# Supplementary material for: Comparative Transcriptome Analysis of Organ-Specific Adaptive Responses to Hypoxia Provides Insights to Human Diseases
Source: Genes (Basel). 2022 Jun 19;13(6):1096. doi: 10.3390/genes13061096 (PMC9222487; doi:10.3390/genes13061096)
Supplement: Supplementary file 1 [file genes-13-01096-s001.zip]

Archive with 16 entries (16 files):
- 0.Supplementary Data.pdf
- Figure S1.pptx
- Figure S2.pptx
- Figure S3.pptx
- Figure S4.pptx
- Table S1.xlsx
- Table S10.xlsx
- Table S11.xlsx
- Table S2.xlsx
- Table S3.xlsx
- Table S4.xlsx
- Table S5.xlsx
- Table S6.xlsx
- Table S7.xlsx
- Table S8.xlsx
- Table S9.xlsx
