# Supplementary material for: Comparative Transcriptome Analysis of Organ-Specific Adaptive Responses to Hypoxia Provides Insights to Human Diseases
Source: Genes (Basel). 2022 Jun 19;13(6):1096. doi: 10.3390/genes13061096 (PMC9222487; doi:10.3390/genes13061096)
Supplement: Supplementary file 1 [file genes-13-01096-s001.zip › Table S1.xlsx]

## Sheet: Brain
Sequence_id	Fold Change	logFC	p-value	FDR	Refseq	Gene_symbol	Gene_Name
abcg4	0.0734107	-3.76787	0.000559208	0.0480596	NP_001335121	-	-
adam9	0.378233	-1.40265	0.00941039	0.0902484	NP_003807	ADAM9	ADAM metallopeptidase domain 9(ADAM9)
adcy8	3.03027	1.59944	0.00750309	0.0811063	NP_001106	ADCY8	adenylate cyclase 8(ADCY8)
adgrb1	3.05409	1.61074	0.00633403	0.0751441	NP_001693	ADGRB1	adhesion G protein-coupled receptor B1(ADGRB1)
adhfe1	3.82483	1.9354	0.00174108	0.0506657	NP_653251	ADHFE1	alcohol dehydrogenase, iron containing 1(ADHFE1)
ak5	7.05104	2.81784	0.000546243	0.0480596	NP_777283	ak5	adenylate kinase 5(AK5)
ak9	5.84079	2.54616	0.000979437	0.0480596	NP_001138600	AK9	adenylate kinase 9(AK9)
ankrd29	0.339573	-1.55821	0.00577621	0.0726215	NP_001295167	ANKRD29	ankyrin repeat domain 29(ANKRD29)
arrb1	3.67358	1.87719	0.00253374	0.053453	NP_004032	ARRB1	arrestin beta 1(ARRB1)
bicd1	0.287239	-1.79968	0.00300484	0.0574839	NP_001003398	BICD1	BICD cargo adaptor 1(BICD1)
c1qtnf4	0.338746	-1.56172	0.00593826	0.0732858	NP_114115	C1QTNF4	C1q and tumor necrosis factor related protein 4(C1QTNF4)
c25h10orf10	13.1692	3.7191	0.000224132	0.0480596	NP_008952	C10orf10	chromosome 10 open reading frame 10(C10orf10)
ca8	0.158915	-2.65367	0.00085808	0.0480596	NP_001308766	CA8	carbonic anhydrase 8(CA8)
cacng2	3.89875	1.96301	0.00398878	0.0621421	NP_001365980	-	-
cald1	2.85917	1.5156	0.00515396	0.0696159	XP_016868143	CALD1	caldesmon 1(CALD1)
cbfa2t2	0.218479	-2.19444	0.00282398	0.0566381	NP_005084	CBFA2T2	CBFA2/RUNX1 translocation partner 2(CBFA2T2)
ccdc178	2.46416	1.30109	0.00931233	0.0897713	XP_011524257	CCDC178	coiled-coil domain containing 178(CCDC178)
cdc42ep3	3.16902	1.66404	0.00820917	0.0846232	NP_001358499	-	-
cdh18	5.08553	2.3464	0.00351104	0.0597322	NP_001336487	-	-
cemip	8.98939	3.16822	0.000763874	0.0480596	NP_001280227	cemip	cell migration inducing hyaluronan binding protein(CEMIP)
cfap54	5.02419	2.32889	0.00319996	0.0589439	NP_001354814	-	-
chn1	2.66244	1.41275	0.00653261	0.076307	NP_001358442	-	-
chst11	6.12874	2.61559	0.00159896	0.0506657	NP_001167453	CHST11	carbohydrate sulfotransferase 11(CHST11)
coro2b	0.137712	-2.86028	0.00068697	0.0480596	NP_006082	CORO2B	coronin 2B(CORO2B)
cpb1	0.0468943	-4.41445	0.00178296	0.0506657	NP_001862	CPB1	carboxypeptidase B1(CPB1)
cpd	0.405412	-1.30254	0.0098339	0.0924029	NP_001295	CPD	carboxypeptidase D(CPD)
cpne9	5.5503	2.47257	0.00110753	0.0480596	NP_705899	CPNE9	copine family member 9(CPNE9)
ctxn1	0.245618	-2.02551	0.00489353	0.0675714	NP_996664	CTXN1	cortexin 1(CTXN1)
dcaf17	0.248969	-2.00596	0.00415338	0.0627773	XP_006712831	DCAF17	DDB1 and CUL4 associated factor 17(DCAF17)
dmrta2	173.133	7.43573	8e-05	0.0480596	XP_011540239	DMRTA2	DMRT like family A2(DMRTA2)
dnttip1	0.394257	-1.34279	0.0084691	0.0858739	NP_443183	DNTTIP1	deoxynucleotidyltransferase terminal interacting protein 1(DNTTIP1)
drc7	3.91781	1.97005	0.00454468	0.0651755	NP_115645	DRC7	dynein regulatory complex subunit 7(DRC7)
dtnbp1	0.328051	-1.60801	0.00631548	0.0750509	NP_115498	DTNBP1	dystrobrevin binding protein 1(DTNBP1)
dusp5	0.262255	-1.93096	0.00347456	0.0597059	NP_004410	DUSP5	dual specificity phosphatase 5(DUSP5)
eml1	2.62729	1.39358	0.00774716	0.0822301	NP_004425	EML1	echinoderm microtubule associated protein like 1(EML1)
erich3	5.53906	2.46964	0.000897154	0.0480596	NP_001002912	ERICH3	glutamate rich 3(ERICH3)
etv1	0.119221	-3.06828	0.000780465	0.0480596	NP_001156622	ETV1	ETS variant 1(ETV1)
etv5	0.23352	-2.09838	0.00165599	0.0506657	NP_004445	ETV5	ETS variant 5(ETV5)
fhdc1	3.87487	1.95415	0.00660164	0.076307	NP_203751	FHDC1	FH2 domain containing 1(FHDC1)
fstl5	7.26219	2.86041	0.00057798	0.0480596	NP_001121899	FSTL5	follistatin like 5(FSTL5)
gad2	3.99412	1.99788	0.00196633	0.0506657	NP_000809	GAD2	glutamate decarboxylase 2(GAD2)
gal3st3	4.93954	2.30438	0.00201408	0.0506657	NP_149025	GAL3ST3	galactose-3-O-sulfotransferase 3(GAL3ST3)
gas6	2.771	1.4704	0.00641436	0.0755623	NP_000811	GAS6	growth arrest specific 6(GAS6)
gata3	8.11239	3.02013	0.00056073	0.0480596	NP_001002295	GATA3	GATA binding protein 3(GATA3)
gfra1	7.90076	2.98199	0.000667726	0.0480596	NP_001369488	-	-
gpi	0.0675118	-3.88872	0.000450177	0.0480596	NP_001316840	GPI	glucose-6-phosphate isomerase(GPI)
hmgxb4	0.327494	-1.61046	0.00402279	0.0622667	NP_001003681	HMGXB4	HMG-box containing 4(HMGXB4)
hook1	0.374505	-1.41694	0.00723473	0.0797536	NP_056972	HOOK1	hook microtubule tethering protein 1(HOOK1)
hsd11b2	7.02409	2.81231	0.000570219	0.0480596	NP_000187	HSD11B2	hydroxysteroid 11-beta dehydrogenase 2(HSD11B2)
ier5l	5.36378	2.42325	0.00177908	0.0506657	NP_982258	IER5L	immediate early response 5 like(IER5L)
itga4	3.31061	1.7271	0.00637329	0.0753523	NP_000876	ITGA4	integrin subunit alpha 4(ITGA4)
kcnj8	3.94436	1.97979	0.00519952	0.0697421	NP_004973	KCNJ8	potassium voltage-gated channel subfamily J member 8(KCNJ8)
kiaa2012	7.19355	2.8467	0.00148768	0.0498198	NP_001264301	KIAA2012	KIAA2012(KIAA2012)
kif15	0.289402	-1.78885	0.00268098	0.0551813	NP_064627	KIF15	kinesin family member 15(KIF15)
kif21a	0.371362	-1.4291	0.00878611	0.0876066	XP_005269071	KIF21A	kinesin family member 21A(KIF21A)
klf12	3.75365	1.90829	0.00179735	0.0506657	XP_016875873	KLF12	Kruppel like factor 12(KLF12)
lgi3	3.60247	1.84899	0.00235872	0.0528183	NP_644807	LGI3	leucine rich repeat LGI family member 3(LGI3)
LOC109044820	3.18913	1.67316	0.00868815	0.0871441	NP_001136202	KCTD1	potassium channel tetramerization domain containing 1(KCTD1)
LOC109044877	0.279421	-1.83949	0.0030382	0.0575036	NP_001316848	UNC13C	unc-13 homolog C(UNC13C)
LOC109044970	4.49028	2.16681	0.00270324	0.0552976	NP_001308572	ROCK2	Rho associated coiled-coil containing protein kinase 2(ROCK2)
LOC109044976	3.05863	1.61288	0.00924516	0.0893554	XP_005267003	GRIK2	glutamate ionotropic receptor kainate type subunit 2(GRIK2)
LOC109045011	0.368306	-1.44103	0.00725424	0.0798594	NP_001355329	-	-
LOC109045026	0.358255	-1.48094	0.00767936	0.0818868	NP_149062	SYNE1	spectrin repeat containing nuclear envelope protein 1(SYNE1)
LOC109045108	6.85105	2.77632	0.0010784	0.0480596	NP_001186026	BAIAP3	BAI1 associated protein 3(BAIAP3)
LOC109045155	2.8089	1.49001	0.009602	0.0912853	NP_000823	GRIN1	glutamate ionotropic receptor NMDA type subunit 1(GRIN1)
LOC109045192	3.38315	1.75837	0.0022637	0.0523301	NP_001354431	-	-
LOC109045223	4.04227	2.01516	0.00142517	0.0493182	NP_000430	pcsk1	proprotein convertase subtilisin/kexin type 1(PCSK1)
LOC109045350	21.2554	4.40976	0.000167266	0.0480596	NP_000818	GRIA1	glutamate ionotropic receptor AMPA type subunit 1(GRIA1)
LOC109045392	3.41357	1.77128	0.00291047	0.0569411	NP_001136157	ARHGAP32	Rho GTPase activating protein 32(ARHGAP32)
LOC109045395	3.78106	1.91879	0.00162263	0.0506657	NP_001287974	CADM1	cell adhesion molecule 1(CADM1)
LOC109045413	5.37106	2.42521	0.00191847	0.0506657	NP_002294	LEPR	leptin receptor(LEPR)
LOC109045416	0.215123	-2.21677	0.00189022	0.0506657	NP_689606	KLHL40	kelch like family member 40(KLHL40)
LOC109045434	0.288793	-1.79189	0.00445443	0.0646098	NP_660149	ZBTB47	zinc finger and BTB domain containing 47(ZBTB47)
LOC109045459	5.36011	2.42226	0.00205927	0.0510313	NP_001362522	-	-
LOC109045462	3.96739	1.98819	0.00577874	0.0726215	NP_872372	VMO1	vitelline membrane outer layer 1 homolog(VMO1)
LOC109045486	0.160938	-2.63542	0.00240011	0.0529533	XP_005251817	olfml2a	olfactomedin like 2A(OLFML2A)
LOC109045542	3.52834	1.81899	0.00689449	0.0779447	NP_001309747	UNC5D	unc-5 netrin receptor D(UNC5D)
LOC109045546	0.305687	-1.70987	0.00432299	0.0636549	XP_024306427	-	-
LOC109045547	0.293837	-1.76691	0.00347893	0.0597059	XP_005256599	RAP1GAP2	RAP1 GTPase activating protein 2(RAP1GAP2)
LOC109045582	4.2299	2.08062	0.00124686	0.0488331	NP_997263	C15orf52	chromosome 15 open reading frame 52(C15orf52)
LOC109045606	0.317052	-1.65721	0.00533005	0.0705384	NP_003710	PDE8B	phosphodiesterase 8B(PDE8B)
LOC109045632	7.2636	2.86069	0.000891184	0.0480596	NP_001264214	IGSF9B	immunoglobulin superfamily member 9B(IGSF9B)
LOC109045659	5.61519	2.48933	0.000725057	0.0480596	NP_001193767	PTPRZ1	protein tyrosine phosphatase, receptor type Z1(PTPRZ1)
LOC109045714	17.2888	4.11177	0.000403482	0.0480596	NP_009048	TRH	thyrotropin releasing hormone(TRH)
LOC109045793	0.151758	-2.72015	0.000750699	0.0480596	NP_064448	BARHL1	BarH like homeobox 1(BARHL1)
LOC109045811	0.187663	-2.41378	0.00973506	0.0921262	NP_066015	EPG5	ectopic P-granules autophagy protein 5 homolog(EPG5)
LOC109045851	0.303045	-1.7224	0.00351394	0.0597322	XP_016873143	b4galnt4	beta-1,4-N-acetyl-galactosaminyltransferase 4(B4GALNT4)
LOC109045891	3.08414	1.62487	0.0043178	0.0636549	NP_001004065	AKAP2	A-kinase anchoring protein 2(AKAP2)
LOC109045897	5.45868	2.44855	0.00143126	0.0493182	NP_001243495	f2rl2	coagulation factor II thrombin receptor like 2(F2RL2)
LOC109045914	4.54447	2.18411	0.0013229	0.0493182	NP_001092140	RASGRP2	RAS guanyl releasing protein 2(RASGRP2)
LOC109045946	0.331424	-1.59325	0.00602047	0.0735677	NP_064448	BARHL1	BarH like homeobox 1(BARHL1)
LOC109046034	0.290883	-1.78149	0.00260939	0.0543461	NP_689498	ARRDC1	arrestin domain containing 1(ARRDC1)
LOC109046120	3.66316	1.87309	0.00497969	0.0681813	NP_003678	PDLIM4	PDZ and LIM domain 4(PDLIM4)
LOC109046231	2.82312	1.49729	0.00641283	0.0755623	NP_001354531	-	-
LOC109046238	0.11658	-3.10061	0.00041432	0.0480596	NP_115925	NTNG2	netrin G2(NTNG2)
LOC109046288	3.45755	1.78975	0.00559671	0.0720151	NP_001138462	NWD2	NACHT and WD repeat domain containing 2(NWD2)
LOC109046428	3.84864	1.94435	0.00197112	0.0506657	NP_001191017	MINOS1-NBL1	MINOS1-NBL1 readthrough(MINOS1-NBL1)
LOC109046444	2.48995	1.31612	0.00952215	0.0908203	NP_004646	AXIN2	axin 2(AXIN2)
LOC109046456	3.33517	1.73776	0.00328809	0.0596567	NP_001374021	-	-
LOC109046493	2.70171	1.43387	0.00694753	0.0781707	NP_001911	DCN	decorin(DCN)
LOC109046501	3.99393	1.99781	0.00174361	0.0506657	NP_001363445	-	-
LOC109046511	0.403641	-1.30886	0.00891553	0.0879178	NP_057283	LSM7	LSM7 homolog, U6 small nuclear RNA and mRNA degradation associated(LSM7)
LOC109046558	6.27249	2.64904	0.00184424	0.0506657	NP_005250	MSTN	myostatin(MSTN)
LOC109046568	0.0907639	-3.46174	0.00060585	0.0480596	NP_000802	GABRA6	gamma-aminobutyric acid type A receptor alpha6 subunit(GABRA6)
LOC109046569	2.74991	1.45938	0.00702135	0.0785191	NP_001121120	GABRA1	gamma-aminobutyric acid type A receptor alpha1 subunit(GABRA1)
LOC109046576	4.07666	2.02739	0.00305874	0.0575036	NP_001277332	TAL1	TAL bHLH transcription factor 1, erythroid differentiation factor(TAL1)
LOC109046608	4.22239	2.07806	0.00383489	0.0610756	NP_000231	MAOA	monoamine oxidase A(MAOA)
LOC109046682	4.16195	2.05726	0.00356916	0.0601964	NP_055108	nptxr	neuronal pentraxin receptor(NPTXR)
LOC109046713	6.65412	2.73425	0.000556524	0.0480596	NP_001094861	lingo3	leucine rich repeat and Ig domain containing 3(LINGO3)
LOC109046727	0.315444	-1.66454	0.00426373	0.0634783	NP_001338707	-	-
LOC109046729	0.325483	-1.61935	0.00471409	0.066295	NP_003191	TCF3	transcription factor 3(TCF3)
LOC109046744	0.394188	-1.34305	0.0098167	0.092391	-	-	-
LOC109046769	3.19741	1.67691	0.00569375	0.0722537	NP_003078	SNCG	synuclein gamma(SNCG)
LOC109046787	0.269518	-1.89154	0.00328644	0.0596567	NP_005068	TLE1	transducin like enhancer of split 1(TLE1)
LOC109046839	3.78687	1.92101	0.0024539	0.0529712	NP_001191017	MINOS1-NBL1	MINOS1-NBL1 readthrough(MINOS1-NBL1)
LOC109046882	0.321261	-1.63818	0.00545292	0.0713718	XP_016871745	ABLIM1	actin binding LIM protein 1(ABLIM1)
LOC109047040	2.40325	1.26499	0.00980033	0.0923676	NP_001308005	dlg4	discs large MAGUK scaffold protein 4(DLG4)
LOC109047169	0.26926	-1.89293	0.00352498	0.0598312	NP_665873	FZD3	frizzled class receptor 3(FZD3)
LOC109047210	3.3939	1.76295	0.003352	0.0596567	NP_009016	FSTL1	follistatin like 1(FSTL1)
LOC109047262	0.0981089	-3.34947	0.00110973	0.0480596	-	-	-
LOC109047270	0.187522	-2.41487	0.00386819	0.0613258	NP_001087199	DYTN	dystrotelin(DYTN)
LOC109047417	3.18498	1.67128	0.00877941	0.0876066	NP_874384	SYPL1	synaptophysin like 1(SYPL1)
LOC109047447	8.07297	3.0131	0.000920421	0.0480596	NP_940918	GALNT18	polypeptide N-acetylgalactosaminyltransferase 18(GALNT18)
LOC109047541	5.18473	2.37427	0.00109958	0.0480596	NP_443138	ELFN2	extracellular leucine rich repeat and fibronectin type III domain containing 2(ELFN2)
LOC109047634	0.316802	-1.65835	0.00801642	0.0837982	-	-	-
LOC109047700	0.0687295	-3.86293	0.000240758	0.0480596	NP_000718	CACNG1	calcium voltage-gated channel auxiliary subunit gamma 1(CACNG1)
LOC109047710	4.76946	2.25383	0.00199589	0.0506657	NP_899069	PHACTR3	phosphatase and actin regulator 3(PHACTR3)
LOC109047711	3.2178	1.68607	0.00811119	0.0843257	XP_016876451	IFI27L1	interferon alpha inducible protein 27 like 1(IFI27L1)
LOC109047782	3.2203	1.6872	0.00611123	0.0739425	NP_057354	KLF2	Kruppel like factor 2(KLF2)
LOC109047942	3.1898	1.67346	0.00563618	0.0720151	NP_954657	KRT18	keratin 18(KRT18)
LOC109047943	2.83741	1.50458	0.00539791	0.0710577	NP_954657	KRT18	keratin 18(KRT18)
LOC109047961	4.80454	2.2644	0.00119057	0.0483929	XP_005270701	TTC39A	tetratricopeptide repeat domain 39A(TTC39A)
LOC109048049	15.0154	3.90837	0.000153003	0.0480596	NP_071356	EGLN3	egl-9 family hypoxia inducible factor 3(EGLN3)
LOC109048076	4.00275	2.00099	0.00186597	0.0506657	XP_005270326	NEURL1	neuralized E3 ubiquitin protein ligase 1(NEURL1)
LOC109048116	0.198275	-2.33442	0.00115698	0.0483229	NP_064705	SLC17A7	solute carrier family 17 member 7(SLC17A7)
LOC109048119	5.46277	2.44963	0.00288823	0.0569411	XP_016865919	PI16	peptidase inhibitor 16(PI16)
LOC109048120	4.24199	2.08474	0.00363589	0.0605958	-	-	-
LOC109048134	0.132044	-2.92091	0.000534241	0.0480596	NP_001308842	DPP10	dipeptidyl peptidase like 10(DPP10)
LOC109048158	10.6584	3.41391	0.00283215	0.0566381	NP_001039	SST	somatostatin(SST)
LOC109048219	48.1878	5.5906	8.98e-05	0.0480596	NP_061054	CAMK2N1	calcium/calmodulin dependent protein kinase II inhibitor 1(CAMK2N1)
LOC109048316	0.173665	-2.52562	0.000900912	0.0480596	XP_016883129	TSHZ2	teashirt zinc finger homeobox 2(TSHZ2)
LOC109048368	4.1291	2.04583	0.00210156	0.0512594	NP_000293	PLOD1	procollagen-lysine,2-oxoglutarate 5-dioxygenase 1(PLOD1)
LOC109048372	4.70412	2.23392	0.00302915	0.0575036	NP_071334	EGLN1	egl-9 family hypoxia inducible factor 1(EGLN1)
LOC109048389	3.54777	1.82691	0.00201704	0.0506657	NP_056531	MINK1	misshapen like kinase 1(MINK1)
LOC109048390	3.10819	1.63608	0.00542029	0.0710577	XP_016880253	PLD2	phospholipase D2(PLD2)
LOC109048437	146.831	7.19802	5.04e-05	0.0480596	NP_981945	RPRML	reprimo like(RPRML)
LOC109048450	3.2555	1.70288	0.00350956	0.0597322	NP_060724	RCOR3	REST corepressor 3(RCOR3)
LOC109048483	0.317074	-1.65711	0.00375343	0.0609413	XP_016875477	DUSP16	dual specificity phosphatase 16(DUSP16)
LOC109048575	0.169411	-2.5614	0.000876268	0.0480596	NP_073565	NEUROD6	neuronal differentiation 6(NEUROD6)
LOC109048638	0.325706	-1.61836	0.00478726	0.0668993	NP_001293073	MTMR1	myotubularin related protein 1(MTMR1)
LOC109048655	0.410469	-1.28466	0.0085854	0.0866794	NP_001349918	-	-
LOC109048685	0.239119	-2.0642	0.00195666	0.0506657	NP_001288014	QKI	QKI, KH domain containing RNA binding(QKI)
LOC109048706	0.355934	-1.49032	0.00624299	0.0746668	NP_001137435	L1CAM	L1 cell adhesion molecule(L1CAM)
LOC109048922	3.44982	1.78652	0.00309569	0.0578685	NP_000809	GAD2	glutamate decarboxylase 2(GAD2)
LOC109048958	0.255758	-1.96715	0.00281245	0.056633	NP_002187	INSM1	INSM transcriptional repressor 1(INSM1)
LOC109048966	4.89392	2.29099	0.00142566	0.0493182	NP_001892	CTGF	connective tissue growth factor(CTGF)
LOC109048981	0.29251	-1.77344	0.00331371	0.0596567	NP_004787	NRXN3	neurexin 3(NRXN3)
LOC109048993	2.93424	1.55298	0.00510964	0.0691681	NP_001307489	CSRNP1	cysteine and serine rich nuclear protein 1(CSRNP1)
LOC109048999	3.19983	1.67799	0.00455662	0.065201	NP_874389	CREM	cAMP responsive element modulator(CREM)
LOC109049001	0.153782	-2.70104	0.00087521	0.0480596	NP_003403	ZIC1	Zic family member 1(ZIC1)
LOC109049002	0.129264	-2.9516	0.00117705	0.0483929	NP_003403	ZIC1	Zic family member 1(ZIC1)
LOC109049003	0.119583	-3.06392	0.000963832	0.0480596	NP_003403	ZIC1	Zic family member 1(ZIC1)
LOC109049004	0.11009	-3.18325	0.000886128	0.0480596	NP_003403	ZIC1	Zic family member 1(ZIC1)
LOC109049007	0.139806	-2.8385	0.000877214	0.0480596	NP_003403	ZIC1	Zic family member 1(ZIC1)
LOC109049031	0.19722	-2.34212	0.0012656	0.0490052	-	-	-
LOC109049076	3.55416	1.82951	0.00529352	0.0702752	NP_001356476	-	-
LOC109049081	0.337354	-1.56767	0.00526436	0.0702393	NP_002063	GNAQ	G protein subunit alpha q(GNAQ)
LOC109049113	2.78512	1.47774	0.00629981	0.0750509	NP_001830	CNN3	calponin 3(CNN3)
LOC109049119	0.234504	-2.09232	0.00138868	0.0493182	NP_001257295	PLPPR3	phospholipid phosphatase related 3(PLPPR3)
LOC109049152	3.32008	1.73122	0.00876389	0.0876066	NP_036578	SSBP2	single stranded DNA binding protein 2(SSBP2)
LOC109049229	0.255334	-1.96954	0.00333968	0.0596567	-	-	-
LOC109049230	0.287124	-1.80026	0.0038341	0.0610756	NP_001356623	-	-
LOC109049284	5.87714	2.55511	0.00217325	0.0517113	NP_001352538	-	-
LOC109049320	5.11041	2.35344	0.00234141	0.0524939	XP_011515850	SNTG1	syntrophin gamma 1(SNTG1)
LOC109049349	2.98152	1.57605	0.00431817	0.0636549	NP_874389	CREM	cAMP responsive element modulator(CREM)
LOC109049386	3.07529	1.62072	0.00474239	0.0664721	NP_001356463	-	-
LOC109049472	0.235246	-2.08776	0.00288785	0.0569411	XP_016861614	NECTIN3	nectin cell adhesion molecule 3(NECTIN3)
LOC109049592	4.38303	2.13193	0.0037597	0.0609413	NP_695008	SLC22A6	solute carrier family 22 member 6(SLC22A6)
LOC109049682	0.3602	-1.47313	0.0076181	0.0817725	NP_001354378	-	-
LOC109049772	3.6263	1.8585	0.0023034	0.0524021	NP_001305723	Cox4I1	cytochrome c oxidase subunit 4I1(COX4I1)
LOC109049844	0.370298	-1.43324	0.00693295	0.0781291	NP_001138837	ZNF652	zinc finger protein 652(ZNF652)
LOC109049918	5.041	2.33371	0.00146799	0.0495172	NP_001153509	RHOBTB2	Rho related BTB domain containing 2(RHOBTB2)
LOC109049923	3.99938	1.99978	0.00141936	0.0493182	NP_150284	CAMK2N2	calcium/calmodulin dependent protein kinase II inhibitor 2(CAMK2N2)
LOC109049929	0.243018	-2.04087	0.00209217	0.0511706	NP_055147	SMPX	small muscle protein, X-linked(SMPX)
LOC109049966	2.46501	1.30159	0.00994276	0.0930759	NP_001693	ADGRB1	adhesion G protein-coupled receptor B1(ADGRB1)
LOC109050005	2.7154	1.44117	0.00699039	0.0784088	NP_001341247	-	-
LOC109050007	0.197019	-2.34359	0.000786488	0.0480596	NP_001139194	HOMER3	homer scaffolding protein 3(HOMER3)
LOC109050010	3.93552	1.97656	0.00171472	0.0506657	NP_116321	RAB11FIP4	RAB11 family interacting protein 4(RAB11FIP4)
LOC109050030	9.7357	3.28328	0.000400379	0.0480596	XP_005248319	DNAH5	dynein axonemal heavy chain 5(DNAH5)
LOC109050107	222.491	7.7976	4.27e-05	0.0480596	NP_001278830	SYT1	synaptotagmin 1(SYT1)
LOC109050121	0.303344	-1.72097	0.00946398	0.0904357	NP_001159724	PLPPR4	phospholipid phosphatase related 4(PLPPR4)
LOC109050122	0.09255	-3.43362	0.000601178	0.0480596	NP_001336171	-	-
LOC109050129	0.24222	-2.04561	0.0020416	0.0508649	NP_001121368	CHST8	carbohydrate sulfotransferase 8(CHST8)
LOC109050204	5.87265	2.55401	0.00174012	0.0506657	NP_001076003	CA10	carbonic anhydrase 10(CA10)
LOC109050267	2.73628	1.45221	0.00858076	0.0866794	NP_942089	MAP4K5	mitogen-activated protein kinase kinase kinase kinase 5(MAP4K5)
LOC109050280	0.215214	-2.21616	0.00347905	0.0597059	XP_005263378	UNC5C	unc-5 netrin receptor C(UNC5C)
LOC109050306	2.61399	1.38625	0.00703708	0.0786004	NP_001273651	FAM120A	family with sequence similarity 120A(FAM120A)
LOC109050317	10.9041	3.4468	0.000282964	0.0480596	NP_940998	SULF2	sulfatase 2(SULF2)
LOC109050532	0.378664	-1.40101	0.00676039	0.0771324	NP_001245205	TMEM200A	transmembrane protein 200A(TMEM200A)
LOC109050549	4.49535	2.16843	0.0010522	0.0480596	NP_004369	CRABP1	cellular retinoic acid binding protein 1(CRABP1)
LOC109050557	4.35583	2.12295	0.00166628	0.0506657	NP_000819	GRIA3	glutamate ionotropic receptor AMPA type subunit 3(GRIA3)
LOC109050600	5.04628	2.33522	0.00185172	0.0506657	NP_001186026	BAIAP3	BAI1 associated protein 3(BAIAP3)
LOC109050633	0.0604841	-4.0473	0.000595429	0.0480596	NP_758952	CACNA2D4	calcium voltage-gated channel auxiliary subunit alpha2delta 4(CACNA2D4)
LOC109050645	16.642	4.05676	0.000263426	0.0480596	NP_001358230	-	-
LOC109050693	0.317459	-1.65536	0.00900155	0.0881005	NP_001138505	c11orf96	chromosome 11 open reading frame 96(C11orf96)
LOC109050705	4.0684	2.02446	0.00140669	0.0493182	NP_940685	MMD2	monocyte to macrophage differentiation associated 2(MMD2)
LOC109050719	3.03713	1.60271	0.00400747	0.0622009	NP_001001852	PIM3	Pim-3 proto-oncogene, serine/threonine kinase(PIM3)
LOC109050768	3.39716	1.76433	0.0034092	0.0596567	NP_001316168	TFPI	tissue factor pathway inhibitor(TFPI)
LOC109050776	2.74568	1.45716	0.00912891	0.0889567	NP_001268659	CST8	cystatin 8(CST8)
LOC109050789	0.257697	-1.95625	0.0022543	0.0523301	NP_001317168	TJP1	tight junction protein 1(TJP1)
LOC109050827	0.298449	-1.74444	0.0024169	0.0529533	XP_016863614	GRID2	glutamate ionotropic receptor delta type subunit 2(GRID2)
LOC109050831	0.340028	-1.55628	0.00468781	0.0661562	XP_016863611	GRID2	glutamate ionotropic receptor delta type subunit 2(GRID2)
LOC109050858	3.80875	1.92932	0.00179193	0.0506657	NP_015564	GRIA3	glutamate ionotropic receptor AMPA type subunit 3(GRIA3)
LOC109050899	14.3941	3.84741	0.000240137	0.0480596	XP_011517895	CAMK1D	calcium/calmodulin dependent protein kinase ID(CAMK1D)
LOC109050989	82.2346	6.36167	0.000186413	0.0480596	NP_057057	GAL	galanin and GMAP prepropeptide(GAL)
LOC109051017	0.35037	-1.51305	0.0054139	0.0710577	NP_065751	PPM1H	protein phosphatase, Mg2+/Mn2+ dependent 1H(PPM1H)
LOC109051059	7.45766	2.89872	0.00123788	0.0488331	XP_011515926	TRPA1	transient receptor potential cation channel subfamily A member 1(TRPA1)
LOC109051093	15.2246	3.92833	0.000329094	0.0480596	NP_001374704	-	-
LOC109051104	2.58814	1.37192	0.0081527	0.0843803	NP_001138355	PRICKLE1	prickle planar cell polarity protein 1(PRICKLE1)
LOC109051112	4.7589	2.25063	0.00195796	0.0506657	NP_001350659	-	-
LOC109051116	3.6812	1.88018	0.00391927	0.0614966	NP_006099	SPON1	spondin 1(SPON1)
LOC109051131	0.332944	-1.58665	0.00624223	0.0746668	NP_387450	CDH7	cadherin 7(CDH7)
LOC109051134	3.17512	1.66681	0.00375411	0.0609413	-	-	-
LOC109051136	3.83587	1.93955	0.00185814	0.0506657	NP_001277332	TAL1	TAL bHLH transcription factor 1, erythroid differentiation factor(TAL1)
LOC109051137	3.81108	1.9302	0.00563591	0.0720151	NP_689660	LRFN5	leucine rich repeat and fibronectin type III domain containing 5(LRFN5)
LOC109051150	3.59708	1.84683	0.00615191	0.074054	NP_067628	CHST6	carbohydrate sulfotransferase 6(CHST6)
LOC109051162	2.5629	1.35777	0.00976805	0.0922766	NP_001365272	-	-
LOC109051185	4.57942	2.19516	0.0028287	0.0566381	NP_115644	ZNRF1	zinc and ring finger 1(ZNRF1)
LOC109051221	3.27382	1.71098	0.00845491	0.0858235	NP_001274064	CDK14	cyclin dependent kinase 14(CDK14)
LOC109051243	0.305485	-1.71082	0.00381409	0.0610756	XP_011539275	EPHA8	EPH receptor A8(EPHA8)
LOC109051269	4.3512	2.12141	0.00152678	0.0504155	NP_001873	CRHBP	corticotropin releasing hormone binding protein(CRHBP)
LOC109051284	0.0494178	-4.33883	0.0018584	0.0506657	NP_758952	CACNA2D4	calcium voltage-gated channel auxiliary subunit alpha2delta 4(CACNA2D4)
LOC109051346	4.19439	2.06846	0.00392544	0.0615163	NP_694968	GIMAP7	GTPase, IMAP family member 7(GIMAP7)
LOC109051471	4.67075	2.22365	0.00221455	0.0519523	NP_001341661	-	-
LOC109051517	2.75763	1.46343	0.00495935	0.0681314	XP_011541130	VWA5A	von Willebrand factor A domain containing 5A(VWA5A)
LOC109051528	6.0438	2.59546	0.00103844	0.0480596	NP_002266	KRT15	keratin 15(KRT15)
LOC109051612	3.09322	1.62911	0.00471549	0.066295	NP_005900	MAP1B	microtubule associated protein 1B(MAP1B)
LOC109051640	9.86107	3.30174	0.000419607	0.0480596	NP_001073935	BTBD17	BTB domain containing 17(BTBD17)
LOC109051643	0.326089	-1.61666	0.00418295	0.062876	NP_001108603	C6	complement C6(C6)
LOC109051652	0.351623	-1.5079	0.00897473	0.0880384	XP_016860538	THSD7B	thrombospondin type 1 domain containing 7B(THSD7B)
LOC109051659	6.08257	2.60468	0.000975745	0.0480596	NP_003078	SNCG	synuclein gamma(SNCG)
LOC109051722	2.7495	1.45917	0.00728771	0.0798742	NP_003398	ZFP36	ZFP36 ring finger protein(ZFP36)
LOC109051741	2.82418	1.49783	0.00852741	0.0863564	NP_003398	ZFP36	ZFP36 ring finger protein(ZFP36)
LOC109051762	0.242303	-2.04511	0.00181969	0.0506657	NP_004677	MTMR7	myotubularin related protein 7(MTMR7)
LOC109051816	3.09836	1.63151	0.00436604	0.0637448	NP_113627	SOX7	SRY-box 7(SOX7)
LOC109051849	0.391341	-1.3535	0.00990219	0.0928567	NP_006292	MAP3K12	mitogen-activated protein kinase kinase kinase 12(MAP3K12)
LOC109051850	6.43755	2.68651	0.000524444	0.0480596	NP_001230540	LMO3	LIM domain only 3(LMO3)
LOC109051853	3.54834	1.82714	0.00284335	0.0567022	XP_006710332	PTPRU	protein tyrosine phosphatase, receptor type U(PTPRU)
LOC109051902	3.03846	1.60334	0.00525959	0.0702261	NP_003079	FSCN1	fascin actin-bundling protein 1(FSCN1)
LOC109051982	2.71918	1.44317	0.00569489	0.0722537	NP_002340	LY75	lymphocyte antigen 75(LY75)
LOC109051997	3.17637	1.66738	0.00445657	0.0646098	NP_065759	SLC12A5	solute carrier family 12 member 5(SLC12A5)
LOC109052096	13.5419	3.75936	0.00102332	0.0480596	XP_011520760	GRIN2A	glutamate ionotropic receptor NMDA type subunit 2A(GRIN2A)
LOC109052110	0.352216	-1.50547	0.00712279	0.078901	XP_016857435	PTPRF	protein tyrosine phosphatase, receptor type F(PTPRF)
LOC109052115	13.6441	3.77021	0.0013499	0.0493182	XP_016878661	GRIN2A	glutamate ionotropic receptor NMDA type subunit 2A(GRIN2A)
LOC109052129	0.127462	-2.97186	0.000520063	0.0480596	NP_997274	RGS9BP	regulator of G-protein signaling 9 binding protein(RGS9BP)
LOC109052130	0.214556	-2.22057	0.00123458	0.0488331	NP_001158504	RNF182	ring finger protein 182(RNF182)
LOC109052132	8.37255	3.06567	0.000787664	0.0480596	NP_001108446	SMTNL2	smoothelin like 2(SMTNL2)
LOC109052141	0.244289	-2.03334	0.00169049	0.0506657	NP_001158504	RNF182	ring finger protein 182(RNF182)
LOC109052144	3.95859	1.98499	0.00233101	0.0524362	XP_016855801	SYT2	synaptotagmin 2(SYT2)
LOC109052152	3.38288	1.75825	0.00379515	0.0610756	NP_057419	PRODH	proline dehydrogenase 1(PRODH)
LOC109052172	3.15957	1.65973	0.00638417	0.0754257	NP_065176	NAV1	neuron navigator 1(NAV1)
LOC109052236	19.7276	4.30214	0.000362475	0.0480596	NP_000442	SHOX	short stature homeobox(SHOX)
LOC109052249	0.0276432	-5.17693	8.81e-05	0.0480596	NP_001265111	EOMES	eomesodermin(EOMES)
LOC109052273	0.306742	-1.7049	0.00342188	0.0596567	NP_060223	PLPPR1	phospholipid phosphatase related 1(PLPPR1)
LOC109052303	9.58901	3.26138	0.000318217	0.0480596	NP_001373981	-	-
LOC109052356	4.21662	2.07609	0.00433787	0.0636549	-	-	-
LOC109052357	6.22264	2.63753	0.00112813	0.0480596	NP_001005463	EBF3	early B-cell factor 3(EBF3)
LOC109052367	7.33927	2.87564	0.0020066	0.0506657	NP_001005463	EBF3	early B-cell factor 3(EBF3)
LOC109052385	5.67742	2.50523	0.00341399	0.0596567	NP_001167609	CCK	cholecystokinin(CCK)
LOC109052441	2.69793	1.43185	0.00935071	0.0899394	NP_001356848	-	-
LOC109052454	0.251229	-1.99292	0.00350186	0.0597322	XP_016877714	UNC13C	unc-13 homolog C(UNC13C)
LOC109052493	0.28695	-1.80113	0.00385625	0.0613258	NP_001336055	-	-
LOC109052512	3.61834	1.85533	0.00231401	0.0524021	NP_997700	PRKCB	protein kinase C beta(PRKCB)
LOC109052551	0.293089	-1.77059	0.00553773	0.0716743	XP_005246433	ERBB4	erb-b2 receptor tyrosine kinase 4(ERBB4)
LOC109052704	0.373291	-1.42163	0.00791388	0.0831942	NP_001287774	SLC35F3	solute carrier family 35 member F3(SLC35F3)
LOC109052860	3.76097	1.9111	0.00219248	0.0518058	NP_004648	SDPR	serum deprivation response(SDPR)
LOC109052885	0.177207	-2.49649	0.0011896	0.0483929	NP_064518	AGPAT4	1-acylglycerol-3-phosphate O-acyltransferase 4(AGPAT4)
LOC109052917	11.1454	3.47837	0.00033101	0.0480596	XP_016861699	epha6	EPH receptor A6(EPHA6)
LOC109052950	3.7465	1.90554	0.00180962	0.0506657	NP_001257357	LMO1	LIM domain only 1(LMO1)
LOC109052960	3.06031	1.61368	0.00613516	0.0739636	XP_005253166	TUB	tubby bipartite transcription factor(TUB)
LOC109052994	0.330111	-1.59898	0.00434618	0.0636549	XP_016877726	NEO1	neogenin 1(NEO1)
LOC109053018	3.8003	1.92611	0.00224945	0.0523301	NP_006460	IVNS1ABP	influenza virus NS1A binding protein(IVNS1ABP)
LOC109053099	0.22794	-2.13327	0.0085571	0.0865301	NP_001035931	PSAP	prosaposin(PSAP)
LOC109053128	3.08889	1.62709	0.00332204	0.0596567	NP_002199	ITGAE	integrin subunit alpha E(ITGAE)
LOC109053139	0.255303	-1.96972	0.00220209	0.0518077	NP_689449	CDC42EP1	CDC42 effector protein 1(CDC42EP1)
LOC109053168	6.97296	2.80177	0.000508176	0.0480596	NP_001193880	SLC16A3	solute carrier family 16 member 3(SLC16A3)
LOC109053201	32.1911	5.00859	0.000101745	0.0480596	NP_061054	CAMK2N1	calcium/calmodulin dependent protein kinase II inhibitor 1(CAMK2N1)
LOC109053217	3.0008	1.58535	0.00430167	0.0636549	NP_001371806	-	-
LOC109053220	2.52046	1.33369	0.00942803	0.0903244	-	-	-
LOC109053316	10.6379	3.41114	0.000290904	0.0480596	NP_612464	CTHRC1	collagen triple helix repeat containing 1(CTHRC1)
LOC109053328	8.49461	3.08655	0.00066792	0.0480596	NP_001361244	-	-
LOC109053365	4.17358	2.06128	0.00432923	0.0636549	NP_055035	TM4SF1	transmembrane 4 L six family member 1(TM4SF1)
LOC109053398	0.376843	-1.40796	0.00712342	0.078901	NP_004790	ZFYVE9	zinc finger FYVE-type containing 9(ZFYVE9)
LOC109053423	21.0074	4.39282	0.00034404	0.0480596	NP_001034977	ANKRD34A	ankyrin repeat domain 34A(ANKRD34A)
LOC109053436	0.260462	-1.94086	0.00887018	0.0878338	-	-	-
LOC109053443	0.373215	-1.42192	0.00889397	0.0878338	XP_016883209	EPB41L1	erythrocyte membrane protein band 4.1 like 1(EPB41L1)
LOC109053486	3.10003	1.63228	0.00474884	0.0665123	NP_001356465	-	-
LOC109053504	0.263889	-1.922	0.00246878	0.0530224	NP_001280157	MYCN	v-myc avian myelocytomatosis viral oncogene neuroblastoma derived homolog(MYCN)
LOC109053507	0.260111	-1.9428	0.00489023	0.0675714	NP_001280157	MYCN	v-myc avian myelocytomatosis viral oncogene neuroblastoma derived homolog(MYCN)
LOC109053524	43.6417	5.44763	0.000246041	0.0480596	NP_001004065	AKAP2	A-kinase anchoring protein 2(AKAP2)
LOC109053592	0.346712	-1.52819	0.00525358	0.0702261	NP_796374	nkx6-2	NK6 homeobox 2(NKX6-2)
LOC109053614	4.48555	2.16528	0.00332476	0.0596567	-	-	-
LOC109053686	3.91469	1.9689	0.0029646	0.0571992	XP_011530539	FAT4	FAT atypical cadherin 4(FAT4)
LOC109053706	10.7013	3.41972	0.000281084	0.0480596	NP_001307521	ADD3	adducin 3(ADD3)
LOC109053707	2.78354	1.47692	0.00797717	0.0835759	XP_016869645	LOC105379356	uncharacterized LOC105379356(LOC105379356)
LOC109053709	3.19862	1.67745	0.00347877	0.0597059	NP_001193531	CHN1	chimerin 1(CHN1)
LOC109053714	35.3877	5.14518	9.54e-05	0.0480596	-	-	-
LOC109053716	0.305447	-1.71101	0.00351593	0.0597322	NP_001135917	ANK1	ankyrin 1(ANK1)
LOC109053718	43.1897	5.43262	0.000104059	0.0480596	XP_024303581	-	-
LOC109053720	4.25035	2.08758	0.00213212	0.0513977	NP_001278232	FAT4	FAT atypical cadherin 4(FAT4)
LOC109053727	0.379549	-1.39764	0.00969644	0.091948	XP_016871605	ANK3	ankyrin 3(ANK3)
LOC109053732	0.356543	-1.48785	0.00717998	0.0793384	XP_016871610	ANK3	ankyrin 3(ANK3)
LOC109053744	2.96915	1.57005	0.00895315	0.0879178	NP_000747	CRH	corticotropin releasing hormone(CRH)
LOC109053860	0.31076	-1.68613	0.0055293	0.0716743	XP_024306598	-	-
LOC109053927	2.74956	1.4592	0.00593794	0.0732858	NP_149035	RTKN	rhotekin(RTKN)
LOC109054006	5.7573	2.52539	0.00693287	0.0781291	NP_653278	MGAT5B	mannosyl (alpha-1,6-)-glycoprotein beta-1,6-N-acetyl-glucosaminyltransferase, isozyme B(MGAT5B)
LOC109054070	2.68183	1.42322	0.00683171	0.0775937	XP_016860253	SLC8A1	solute carrier family 8 member A1(SLC8A1)
LOC109054083	0.224713	-2.15385	0.00338452	0.0596567	-	-	-
LOC109054101	2.68334	1.42403	0.00711821	0.078901	NP_001339807	-	-
LOC109054113	5.77073	2.52875	0.000744114	0.0480596	NP_000187	HSD11B2	hydroxysteroid 11-beta dehydrogenase 2(HSD11B2)
LOC109054136	0.224298	-2.15651	0.00421662	0.0632527	XP_016861707	epha6	EPH receptor A6(EPHA6)
LOC109054251	4.94559	2.30614	0.00140368	0.0493182	NP_065976	CACHD1	cache domain containing 1(CACHD1)
LOC109054253	4.55118	2.18624	0.00270448	0.0552976	NP_065976	CACHD1	cache domain containing 1(CACHD1)
LOC109054299	3.1049	1.63455	0.00379268	0.0610756	NP_056978	STMN3	stathmin 3(STMN3)
LOC109054309	0.2065	-2.27578	0.00353782	0.0599398	NP_005966	PTK6	protein tyrosine kinase 6(PTK6)
LOC109054340	4.50859	2.17268	0.00231131	0.0524021	NP_000293	PLOD1	procollagen-lysine,2-oxoglutarate 5-dioxygenase 1(PLOD1)
LOC109054350	0.127945	-2.96641	0.00093995	0.0480596	-	-	-
LOC109054363	0.253317	-1.98098	0.00415887	0.0627773	NP_002933	ROBO2	roundabout guidance receptor 2(ROBO2)
LOC109054397	3.62368	1.85746	0.00211482	0.0513804	NP_056056	MICAL3	microtubule associated monooxygenase, calponin and LIM domain containing 3(MICAL3)
LOC109054444	4.04555	2.01634	0.00169693	0.0506657	NP_001188412	ENO1	enolase 1(ENO1)
LOC109054463	4.10503	2.03739	0.00198401	0.0506657	NP_001341605	-	-
LOC109054488	5.56418	2.47617	0.0028967	0.0569411	NP_001128726	PAX7	paired box 7(PAX7)
LOC109054601	3.34984	1.74409	0.00317299	0.0586986	NP_065149	PPP2R2C	protein phosphatase 2 regulatory subunit Bgamma(PPP2R2C)
LOC109054622	8.58092	3.10113	0.000401249	0.0480596	-	-	-
LOC109054632	6.47262	2.69435	0.000592287	0.0480596	NP_001139321	PROM1	prominin 1(PROM1)
LOC109054676	6.99628	2.80659	0.000522751	0.0480596	NP_000823	GRIN1	glutamate ionotropic receptor NMDA type subunit 1(GRIN1)
LOC109054718	3.97282	1.99016	0.00898587	0.0880861	NP_001366390	-	-
LOC109054734	8.65414	3.11339	0.00106007	0.0480596	NP_001158238	ZFHX3	zinc finger homeobox 3(ZFHX3)
LOC109054771	5.93388	2.56898	0.00282546	0.0566381	NP_002980	CCL21	C-C motif chemokine ligand 21(CCL21)
LOC109054804	0.269342	-1.89249	0.00704638	0.0786571	NP_008968	ADAMTS8	ADAM metallopeptidase with thrombospondin type 1 motif 8(ADAMTS8)
LOC109054917	3.35167	1.74488	0.00330771	0.0596567	NP_001116538	MAPT	microtubule associated protein tau(MAPT)
LOC109054930	3.08505	1.62529	0.00914468	0.0889859	NP_002023	FTH1	ferritin heavy chain 1(FTH1)
LOC109054959	7.54515	2.91555	0.00152206	0.0504155	NP_001307572	LOC102724428	serine/threonine-protein kinase SIK1(LOC102724428)
LOC109054962	0.363607	-1.45955	0.00961482	0.0913605	NP_004967	KCNC1	potassium voltage-gated channel subfamily C member 1(KCNC1)
LOC109054996	3.43423	1.77999	0.00388947	0.0613258	NP_006149	NEFL	neurofilament, light polypeptide(NEFL)
LOC109055015	8.18868	3.03363	0.0010161	0.0480596	NP_001307572	LOC102724428	serine/threonine-protein kinase SIK1(LOC102724428)
LOC109055093	3.35922	1.74813	0.00273659	0.0556174	XP_005247294	nlgn1	neuroligin 1(NLGN1)
LOC109055164	0.175665	-2.5091	0.00133717	0.0493182	NP_064705	SLC17A7	solute carrier family 17 member 7(SLC17A7)
LOC109055217	0.302693	-1.72407	0.00286254	0.0569023	NP_005554	STMN1	stathmin 1(STMN1)
LOC109055231	37.9295	5.24525	9.15e-05	0.0480596	XP_016881049	cbln2	cerebellin 2 precursor(CBLN2)
LOC109055269	3.20401	1.67988	0.00346616	0.0597059	XP_011539620	HSPG2	heparan sulfate proteoglycan 2(HSPG2)
LOC109055278	4.17798	2.06281	0.00350161	0.0597322	NP_848663	RTN4RL1	reticulon 4 receptor like 1(RTN4RL1)
LOC109055293	0.297238	-1.75031	0.00273808	0.0556174	NP_665813	cacng6	calcium voltage-gated channel auxiliary subunit gamma 6(CACNG6)
LOC109055323	3.37107	1.75321	0.0037025	0.0607903	NP_054860	CNTNAP2	contactin associated protein-like 2(CNTNAP2)
LOC109055346	0.317748	-1.65404	0.00410571	0.0627023	NP_002909	RFX1	regulatory factor X1(RFX1)
LOC109055366	7.74168	2.95265	0.000728887	0.0480596	XP_016856500	ak5	adenylate kinase 5(AK5)
LOC109055393	17.445	4.12475	0.00030199	0.0480596	NP_001017962	P4HA1	prolyl 4-hydroxylase subunit alpha 1(P4HA1)
LOC109055412	3.06863	1.61759	0.00862957	0.0867907	NP_066000	SLC7A14	solute carrier family 7 member 14(SLC7A14)
LOC109055553	3.43388	1.77984	0.00853064	0.0863564	NP_001369591	-	-
LOC109055556	3.01279	1.5911	0.00519275	0.0697421	NP_001369586	-	-
LOC109055590	3.60695	1.85078	0.00484108	0.0672972	NP_005618	SGK1	serum/glucocorticoid regulated kinase 1(SGK1)
LOC109055662	2.55231	1.3518	0.00756525	0.0815118	-	-	-
LOC109055718	3.43394	1.77986	0.00784495	0.0829387	NP_001008274	TAGLN3	transgelin 3(TAGLN3)
LOC109055736	5.54444	2.47104	0.000704611	0.0480596	NP_001363399	-	-
LOC109055793	0.109539	-3.19048	0.000484626	0.0480596	NP_001417	EN1	engrailed homeobox 1(EN1)
LOC109055815	25.3463	4.6637	0.00020364	0.0480596	XP_011515898	ZFHX4	zinc finger homeobox 4(ZFHX4)
LOC109055817	2.49508	1.31908	0.009833	0.0924029	NP_001127879	GRIN2A	glutamate ionotropic receptor NMDA type subunit 2A(GRIN2A)
LOC109055877	5.77645	2.53018	0.00305569	0.0575036	NP_001353621	-	-
LOC109055890	5.59047	2.48297	0.00188251	0.0506657	XP_011537839	NT5C2	5'-nucleotidase, cytosolic II(NT5C2)
LOC109055913	0.245524	-2.02606	0.00150386	0.0500013	NP_001375332	-	-
LOC109055929	8.29731	3.05264	0.000894922	0.0480596	NP_001354427	-	-
LOC109056105	0.120696	-3.05055	0.0032677	0.0596567	NP_003980	PAX2	paired box 2(PAX2)
LOC109056130	3.10327	1.63379	0.00375044	0.0609413	NP_060821	FGD6	FYVE, RhoGEF and PH domain containing 6(FGD6)
LOC109056158	3.58054	1.84018	0.0035054	0.0597322	NP_001291490	BTNL2	butyrophilin like 2(BTNL2)
LOC109056206	9.14554	3.19307	0.000326772	0.0480596	NP_005323	HBZ	hemoglobin subunit zeta(HBZ)
LOC109056350	2.7174	1.44223	0.00673623	0.0769984	NP_001856	COX7A2	cytochrome c oxidase subunit 7A2(COX7A2)
LOC109056353	3.20737	1.68139	0.00296675	0.0571992	NP_689958	NXPH1	neurexophilin 1(NXPH1)
LOC109056360	3.69187	1.88435	0.00242237	0.0529533	NP_647475	ANGPTL4	angiopoietin like 4(ANGPTL4)
LOC109056387	4.4739	2.16153	0.00303684	0.0575036	NP_150287	SLC8A3	solute carrier family 8 member A3(SLC8A3)
LOC109056394	2.84128	1.50654	0.00729294	0.0798742	NP_003603	SEMA7A	semaphorin 7A (John Milton Hagen blood group)(SEMA7A)
LOC109056396	0.0238858	-5.3877	0.000305666	0.0480596	NP_001288127	LINGO1	leucine rich repeat and Ig domain containing 1(LINGO1)
LOC109056412	0.162917	-2.61779	0.00738364	0.0803991	NP_067042	JAM2	junctional adhesion molecule 2(JAM2)
LOC109056454	0.357819	-1.4827	0.00773745	0.0821798	XP_024303730	-	-
LOC109056510	0.275288	-1.86099	0.0026521	0.0546474	NP_653236	FAM131A	family with sequence similarity 131 member A(FAM131A)
LOC109056558	0.378426	-1.40192	0.00882926	0.0877074	XP_011529263	OPHN1	oligophrenin 1(OPHN1)
LOC109056616	4.80003	2.26304	0.00122759	0.0488331	NP_060796	GIMAP4	GTPase, IMAP family member 4(GIMAP4)
LOC109056638	11.4497	3.51723	0.000391308	0.0480596	NP_001365167	-	-
LOC109056639	12.9996	3.70039	0.000226592	0.0480596	NP_001365167	-	-
LOC109056663	18.0456	4.17358	0.000333365	0.0480596	NP_110383	TCF7L2	transcription factor 7 like 2(TCF7L2)
LOC109056666	2.66969	1.41667	0.00590201	0.0730506	NP_006832	SLC38A3	solute carrier family 38 member 3(SLC38A3)
LOC109056671	3.1982	1.67726	0.00598127	0.0735347	NP_060275	RASIP1	Ras interacting protein 1(RASIP1)
LOC109056673	3.36479	1.75052	0.00403324	0.0623123	NP_006507	SLC2A1	solute carrier family 2 member 1(SLC2A1)
LOC109056717	3.03	1.59932	0.00429235	0.0636549	NP_003079	FSCN1	fascin actin-bundling protein 1(FSCN1)
LOC109056730	0.097905	-3.35247	0.000467011	0.0480596	NP_612192	PCSK6	proprotein convertase subtilisin/kexin type 6(PCSK6)
LOC109056765	0.329015	-1.60377	0.00659127	0.076307	XP_016870462	PTPRD	protein tyrosine phosphatase, receptor type D(PTPRD)
LOC109056820	0.37326	-1.42175	0.00916103	0.0890517	NP_722522	RASGRF1	Ras protein specific guanine nucleotide releasing factor 1(RASGRF1)
LOC109056840	2.98851	1.57943	0.00790625	0.0831942	NP_001124317	BCL6	B-cell CLL/lymphoma 6(BCL6)
LOC109056842	15.6137	3.96474	0.000529031	0.0480596	NP_061908	PCDH18	protocadherin 18(PCDH18)
LOC109056853	0.294825	-1.76207	0.00321117	0.0590919	NP_001009939	SEPT5	septin 5(SEPT5)
LOC109056858	2.84191	1.50686	0.00630834	0.0750509	XP_016884853	ARHGEF9	Cdc42 guanine nucleotide exchange factor 9(ARHGEF9)
LOC109056912	5.00516	2.32342	0.000929019	0.0480596	NP_001243759	asic1	acid sensing ion channel subunit 1(ASIC1)
LOC109056922	19.0718	4.25337	0.000321	0.0480596	NP_001268992	DOC2A	double C2 domain alpha(DOC2A)
LOC109056933	12.7135	3.66829	0.000514449	0.0480596	NP_001079	AANAT	aralkylamine N-acetyltransferase(AANAT)
LOC109056960	4.80374	2.26416	0.000864427	0.0480596	NP_660282	PRRT2	proline rich transmembrane protein 2(PRRT2)
LOC109056995	0.145873	-2.77722	0.000918878	0.0480596	NP_001438	FAT2	FAT atypical cadherin 2(FAT2)
LOC109057000	3.5791	1.8396	0.003546	0.0600236	NP_001296372	SPARC	secreted protein acidic and cysteine rich(SPARC)
LOC109057001	3.69512	1.88562	0.0043257	0.0636549	NP_000162	GLRA1	glycine receptor alpha 1(GLRA1)
LOC109057007	0.290443	-1.78367	0.0033309	0.0596567	NP_006641	CPLX2	complexin 2(CPLX2)
LOC109057027	3.06679	1.61673	0.00600042	0.0735347	NP_001296372	SPARC	secreted protein acidic and cysteine rich(SPARC)
LOC109057060	4.00767	2.00276	0.00167935	0.0506657	NP_055544	TOX	thymocyte selection associated high mobility group box(TOX)
LOC109057081	3.60466	1.84986	0.00590347	0.0730506	NP_001078846	MCC	mutated in colorectal cancers(MCC)
LOC109057112	11.1509	3.47909	0.000378257	0.0480596	NP_001229537	NCAM1	neural cell adhesion molecule 1(NCAM1)
LOC109057120	3.53492	1.82168	0.00633546	0.0751441	XP_016884158	HIC2	HIC ZBTB transcriptional repressor 2(HIC2)
LOC109057157	0.249035	-2.00558	0.00185541	0.0506657	XP_016877288	NRXN3	neurexin 3(NRXN3)
LOC109057161	4.49149	2.16719	0.00251485	0.0533574	NP_005518	HSPA1L	heat shock protein family A (Hsp70) member 1 like(HSPA1L)
LOC109057167	3.9412	1.97863	0.00221662	0.0519523	NP_001375266	-	-
LOC109057186	3.3023	1.72347	0.0050628	0.0687006	NP_001333374	-	-
LOC109057224	17.1006	4.09597	0.000138797	0.0480596	NP_001358116	-	-
LOC109057291	3.50295	1.80857	0.00307442	0.0577184	NP_001274170	ITM2C	integral membrane protein 2C(ITM2C)
LOC109057318	0.273701	-1.86933	0.0024076	0.0529533	NP_001363801	-	-
LOC109057342	0.262951	-1.92713	0.002897	0.0569411	XP_011539277	EPHA8	EPH receptor A8(EPHA8)
LOC109057409	2.73431	1.45118	0.00624233	0.0746668	NP_001186512	PACSIN1	protein kinase C and casein kinase substrate in neurons 1(PACSIN1)
LOC109057445	0.161692	-2.62868	0.000782825	0.0480596	NP_006604	GRAP	GRB2-related adaptor protein(GRAP)
LOC109057477	2.55982	1.35604	0.00876645	0.0876066	NP_127501	PCBP4	poly(rC) binding protein 4(PCBP4)
LOC109057516	4.36651	2.12648	0.00136127	0.0493182	NP_001193944	PTPRR	protein tyrosine phosphatase, receptor type R(PTPRR)
LOC109057598	2.67747	1.42087	0.00657305	0.076307	NP_006550	KHDRBS1	KH RNA binding domain containing, signal transduction associated 1(KHDRBS1)
LOC109057686	57.9908	5.85775	0.000396334	0.0480596	XP_006721115	GPRC5B	G protein-coupled receptor class C group 5 member B(GPRC5B)
LOC109057717	3.08853	1.62692	0.00586199	0.0730074	NP_060103	FAM46A	family with sequence similarity 46 member A(FAM46A)
LOC109057741	6.60291	2.7231	0.000451709	0.0480596	NP_056056	MICAL3	microtubule associated monooxygenase, calponin and LIM domain containing 3(MICAL3)
LOC109057744	2.83239	1.50202	0.0057288	0.072383	NP_619634	PPP1R14B	protein phosphatase 1 regulatory inhibitor subunit 14B(PPP1R14B)
LOC109057745	3.45199	1.78743	0.00283015	0.0566381	NP_001339718	-	-
LOC109057768	0.221826	-2.1725	0.00135439	0.0493182	XP_011535675	NRXN3	neurexin 3(NRXN3)
LOC109057817	5.17937	2.37278	0.00337671	0.0596567	NP_660279	B3GNT7	UDP-GlcNAc:betaGal beta-1,3-N-acetylglucosaminyltransferase 7(B3GNT7)
LOC109057820	5.87797	2.55532	0.00182	0.0506657	NP_660279	B3GNT7	UDP-GlcNAc:betaGal beta-1,3-N-acetylglucosaminyltransferase 7(B3GNT7)
LOC109057845	0.332857	-1.58703	0.00476759	0.0667247	NP_001295139	TSHZ1	teashirt zinc finger homeobox 1(TSHZ1)
LOC109057846	0.305472	-1.71089	0.0036239	0.06057	NP_001295139	TSHZ1	teashirt zinc finger homeobox 1(TSHZ1)
LOC109057877	4.98664	2.31807	0.00113737	0.0480596	NP_001033	SLC2A4	solute carrier family 2 member 4(SLC2A4)
LOC109057887	2.77596	1.47299	0.00759186	0.0816565	NP_005388	PODXL	podocalyxin like(PODXL)
LOC109057919	4.33118	2.11476	0.0014556	0.049368	NP_001193871	CSPG5	chondroitin sulfate proteoglycan 5(CSPG5)
LOC109057967	0.228819	-2.12772	0.00175005	0.0506657	NP_004445	ETV5	ETS variant 5(ETV5)
LOC109058016	0.228168	-2.13183	0.00197308	0.0506657	NP_570139	TSPAN18	tetraspanin 18(TSPAN18)
LOC109058033	7.05198	2.81803	0.000496602	0.0480596	NP_689958	NXPH1	neurexophilin 1(NXPH1)
LOC109058039	4.12571	2.04464	0.00231806	0.0524021	XP_011538818	IFI44	interferon induced protein 44(IFI44)
LOC109058064	8.39528	3.06958	0.000453327	0.0480596	NP_003608	RGS5	regulator of G-protein signaling 5(RGS5)
LOC109058065	2.68295	1.42382	0.00730986	0.0799437	XP_011508393	RGS8	regulator of G-protein signaling 8(RGS8)
LOC109058077	2.66695	1.41519	0.00726151	0.0798594	NP_919248	RBPMS2	RNA binding protein with multiple splicing 2(RBPMS2)
LOC109058089	5.66658	2.50248	0.00148734	0.0498198	NP_001243495	f2rl2	coagulation factor II thrombin receptor like 2(F2RL2)
LOC109058092	2.74791	1.45834	0.00721444	0.0795772	NP_002244	KDR	kinase insert domain receptor(KDR)
LOC109058212	51.7403	5.69322	9.93e-05	0.0480596	NP_001157150	SHOX2	short stature homeobox 2(SHOX2)
LOC109058301	3.56231	1.83281	0.00451561	0.0651031	NP_997263	C15orf52	chromosome 15 open reading frame 52(C15orf52)
LOC109058310	0.275497	-1.85989	0.00630821	0.0750509	XP_016863370	EPHA5	EPH receptor A5(EPHA5)
LOC109058360	45.2787	5.50076	0.000100818	0.0480596	NP_001316998	PRKD1	protein kinase D1(PRKD1)
LOC109058433	3.95082	1.98215	0.00251231	0.0533574	NP_001124390	TTLL6	tubulin tyrosine ligase like 6(TTLL6)
LOC109058439	0.0715859	-3.80418	0.00466935	0.0660461	NP_116070	TRIM51	tripartite motif-containing 51(TRIM51)
LOC109058442	3.19618	1.67635	0.00338086	0.0596567	NP_078902	VTCN1	V-set domain containing T cell activation inhibitor 1(VTCN1)
LOC109058443	0.366645	-1.44754	0.00893748	0.0879178	NP_001013275	bcam	basal cell adhesion molecule (Lutheran blood group)(BCAM)
LOC109058444	2.9583	1.56477	0.00495974	0.0681314	NP_078902	VTCN1	V-set domain containing T cell activation inhibitor 1(VTCN1)
LOC109058446	0.101602	-3.299	0.00972157	0.0921169	NP_116070	TRIM51	tripartite motif-containing 51(TRIM51)
LOC109058451	3.20061	1.67835	0.00893895	0.0879178	NP_001289619	APOE	apolipoprotein E(APOE)
LOC109058459	0.103026	-3.27892	0.00843528	0.0857096	NP_116070	TRIM51	tripartite motif-containing 51(TRIM51)
LOC109058468	2.44612	1.2905	0.00859337	0.0866794	NP_003636	SLC27A2	solute carrier family 27 member 2(SLC27A2)
LOC109058479	5.26644	2.39683	0.0016264	0.0506657	NP_003729	PTCH2	patched 2(PTCH2)
LOC109058494	0.243705	-2.03679	0.0037444	0.0609413	XP_016859071	ERBB4	erb-b2 receptor tyrosine kinase 4(ERBB4)
LOC109058534	8.99552	3.16921	0.000391742	0.0480596	XP_016881049	cbln2	cerebellin 2 precursor(CBLN2)
LOC109058548	6.76049	2.75713	0.00110189	0.0480596	NP_115618	plxna1	plexin A1(PLXNA1)
LOC109058566	0.279288	-1.84017	0.00911391	0.0889192	XP_011515700	RIMS2	regulating synaptic membrane exocytosis 2(RIMS2)
LOC109058596	11.1013	3.47265	0.000563179	0.0480596	NP_705899	CPNE9	copine family member 9(CPNE9)
LOC109058603	0.242508	-2.0439	0.00233601	0.0524362	NP_001341116	-	-
LOC109058604	0.275197	-1.86146	0.00418812	0.062876	NP_001338420	-	-
LOC109058608	3.07882	1.62238	0.0061122	0.0739425	NP_001161792	TSPAN9	tetraspanin 9(TSPAN9)
LOC109058625	4.12083	2.04294	0.0034452	0.0596618	NP_001317922	GRIK1	glutamate ionotropic receptor kainate type subunit 1(GRIK1)
LOC109058679	0.353959	-1.49834	0.00609758	0.0739425	NP_001074003	UNC13C	unc-13 homolog C(UNC13C)
LOC109058707	0.293612	-1.76802	0.00431395	0.0636549	NP_075461	CACNA1A	calcium voltage-gated channel subunit alpha1 A(CACNA1A)
LOC109058709	0.33547	-1.57574	0.00642746	0.0756081	NP_001120693	CACNA1A	calcium voltage-gated channel subunit alpha1 A(CACNA1A)
LOC109058718	4.88217	2.28752	0.00245007	0.0529712	NP_036603	TRPC5	transient receptor potential cation channel subfamily C member 5(TRPC5)
LOC109058770	3.94122	1.97864	0.00188948	0.0506657	NP_003033	SLC6A1	solute carrier family 6 member 1(SLC6A1)
LOC109058771	4.00996	2.00359	0.00185857	0.0506657	NP_003033	SLC6A1	solute carrier family 6 member 1(SLC6A1)
LOC109058843	0.0902607	-3.46976	0.00134957	0.0493182	NP_001288127	LINGO1	leucine rich repeat and Ig domain containing 1(LINGO1)
LOC109058849	0.195838	-2.35226	0.0086702	0.0870477	NP_001288127	LINGO1	leucine rich repeat and Ig domain containing 1(LINGO1)
LOC109059036	0.27965	-1.83831	0.00581174	0.0727768	NP_631875	KCNC2	potassium voltage-gated channel subfamily C member 2(KCNC2)
LOC109059048	3.83344	1.93864	0.00365024	0.0606468	NP_001303	CRIP2	cysteine rich protein 2(CRIP2)
LOC109059084	0.387009	-1.36956	0.00831179	0.0849741	NP_001157945	FNBP1L	formin binding protein 1 like(FNBP1L)
LOC109059114	0.292323	-1.77437	0.00605049	0.0737627	-	-	-
LOC109059196	4.86605	2.28275	0.0010943	0.0480596	XP_011522041	RAP1GAP2	RAP1 GTPase activating protein 2(RAP1GAP2)
LOC109059202	0.253659	-1.97904	0.00242094	0.0529533	NP_009060	ZIC2	Zic family member 2(ZIC2)
LOC109059204	0.235801	-2.08436	0.00189441	0.0506657	NP_149123	ZIC5	Zic family member 5(ZIC5)
LOC109059224	3.06121	1.6141	0.00770868	0.0820581	NP_001305408	TSKU	tsukushi, small leucine rich proteoglycan(TSKU)
LOC109059236	2.77253	1.4712	0.00711373	0.078901	XP_016861958	MYLK	myosin light chain kinase(MYLK)
LOC109059275	6.32835	2.66183	0.00114291	0.0480596	NP_473455	TAGAP	T-cell activation RhoGTPase activating protein(TAGAP)
LOC109059308	0.320844	-1.64006	0.00948259	0.0905671	NP_055888	SIPA1L3	signal induced proliferation associated 1 like 3(SIPA1L3)
LOC109059338	3.21188	1.68342	0.00531885	0.0705069	NP_663780	SYNM	synemin(SYNM)
LOC109059352	2.57669	1.36552	0.00979182	0.0923342	NP_001335329	-	-
LOC109059400	0.220159	-2.18338	0.00194965	0.0506657	XP_011515614	ARHGAP39	Rho GTPase activating protein 39(ARHGAP39)
LOC109059431	0.121978	-3.0353	0.00165653	0.0506657	NP_004343	CBLN1	cerebellin 1 precursor(CBLN1)
LOC109059480	2.75889	1.46409	0.00817294	0.084437	NP_057276	TMEFF2	transmembrane protein with EGF like and two follistatin like domains 2(TMEFF2)
LOC109059484	6.16154	2.62329	0.00086526	0.0480596	NP_001352935	-	-
LOC109059490	2.99761	1.58381	0.00889265	0.0878338	NP_001371475	-	-
LOC109059492	8.78598	3.1352	0.00106744	0.0480596	NP_001352931	-	-
LOC109059608	3.93182	1.9752	0.00555392	0.0717839	NP_001335028	-	-
LOC109059676	13.5186	3.75688	0.000350451	0.0480596	NP_005645	NR2F1	nuclear receptor subfamily 2 group F member 1(NR2F1)
LOC109059696	0.331453	-1.59312	0.00566653	0.0721852	-	-	-
LOC109059703	2.85253	1.51224	0.00693602	0.0781291	NP_065852	ARRDC3	arrestin domain containing 3(ARRDC3)
LOC109059771	0.153339	-2.70521	0.000753375	0.0480596	NP_073565	NEUROD6	neuronal differentiation 6(NEUROD6)
LOC109059777	0.327379	-1.61097	0.00872769	0.0874463	NP_001028	SCN1B	sodium voltage-gated channel beta subunit 1(SCN1B)
LOC109059847	15.5411	3.95802	0.000198787	0.0480596	NP_001892	CTGF	connective tissue growth factor(CTGF)
LOC109059857	12.6302	3.65881	0.000338343	0.0480596	NP_055544	TOX	thymocyte selection associated high mobility group box(TOX)
LOC109059872	0.288799	-1.79186	0.00413297	0.0627773	-	-	-
LOC109059881	5.07431	2.34321	0.0010089	0.0480596	XP_024309981	-	-
LOC109059922	3.10654	1.63531	0.00457994	0.0654288	XP_011532610	IQSEC1	IQ motif and Sec7 domain 1(IQSEC1)
LOC109060044	13.1356	3.71541	0.000227411	0.0480596	NP_002729	PRKCB	protein kinase C beta(PRKCB)
LOC109060072	4.96977	2.31318	0.00342866	0.0596618	NP_005515	HES1	hes family bHLH transcription factor 1(HES1)
LOC109060145	6.78415	2.76217	0.000595443	0.0480596	XP_024301780	-	-
LOC109060148	2.67974	1.42209	0.00745416	0.0809246	XP_016873111	GRIK4	glutamate ionotropic receptor kainate type subunit 4(GRIK4)
LOC109060187	4.0896	2.03196	0.00280439	0.0565318	NP_000187	HSD11B2	hydroxysteroid 11-beta dehydrogenase 2(HSD11B2)
LOC109060290	2.84509	1.50847	0.00665985	0.0766029	NP_055146	SLC7A11	solute carrier family 7 member 11(SLC7A11)
LOC109060392	3.52714	1.8185	0.00292245	0.0569954	XP_016880767	KSR1	kinase suppressor of ras 1(KSR1)
LOC109060419	6.22302	2.63762	0.000592521	0.0480596	NP_001165125	KLHL5	kelch like family member 5(KLHL5)
LOC109060420	7.64469	2.93446	0.000918764	0.0480596	NP_004737	DLGAP1	DLG associated protein 1(DLGAP1)
LOC109060434	2.63297	1.39669	0.00655585	0.076307	NP_002329	LSAMP	limbic system-associated membrane protein(LSAMP)
LOC109060444	0.372204	-1.42583	0.00862524	0.0867907	NP_001098720	NRXN3	neurexin 3(NRXN3)
LOC109060527	3.31279	1.72805	0.00257681	0.0539817	NP_775782	FAM117B	family with sequence similarity 117 member B(FAM117B)
LOC109060542	3.64501	1.86592	0.00227708	0.0524021	NP_001193874	CSPG5	chondroitin sulfate proteoglycan 5(CSPG5)
LOC109060547	3.06658	1.61663	0.00728966	0.0798742	NP_001308037	SLC4A7	solute carrier family 4 member 7(SLC4A7)
LOC109060580	0.210319	-2.24935	0.00174703	0.0506657	NP_001288014	QKI	QKI, KH domain containing RNA binding(QKI)
LOC109060581	2.88893	1.53054	0.00580621	0.0727768	NP_001668	ATP1B1	ATPase Na+/K+ transporting subunit beta 1(ATP1B1)
LOC109060713	14.5529	3.86324	0.00117677	0.0483929	XP_005249304	CPNE5	copine 5(CPNE5)
LOC109060740	2.81878	1.49507	0.00581762	0.0727768	NP_055682	KBTBD11	kelch repeat and BTB domain containing 11(KBTBD11)
LOC109060751	3.59178	1.8447	0.00226371	0.0523301	NP_055682	KBTBD11	kelch repeat and BTB domain containing 11(KBTBD11)
LOC109060784	4.01972	2.00709	0.0040443	0.0623795	NP_001317669	RUSC2	RUN and SH3 domain containing 2(RUSC2)
LOC109060820	11.8583	3.56782	0.00764546	0.0818868	NP_004282	CARTPT	CART prepropeptide(CARTPT)
LOC109060863	0.161261	-2.63253	0.00111313	0.0480596	NP_000826	GRIN2C	glutamate ionotropic receptor NMDA type subunit 2C(GRIN2C)
LOC109060912	0.328994	-1.60387	0.00488398	0.0675714	NP_001244897	CCDC129	coiled-coil domain containing 129(CCDC129)
LOC109060927	0.36809	-1.44187	0.00694905	0.0781707	NP_002513	NPTX1	neuronal pentraxin 1(NPTX1)
LOC109060940	3.46752	1.7939	0.00206971	0.0510384	NP_001185546	MAP7	microtubule associated protein 7(MAP7)
LOC109060985	3.15846	1.65922	0.00310067	0.0578685	XP_011543787	MAP7D2	MAP7 domain containing 2(MAP7D2)
LOC109061017	2.93227	1.55202	0.00750126	0.0811063	NP_006189	PCP4	Purkinje cell protein 4(PCP4)
LOC109061043	37.5022	5.2289	0.000152049	0.0480596	NP_001350918	-	-
LOC109061053	0.272335	-1.87655	0.00579348	0.072706	NP_005084	CBFA2T2	CBFA2/RUNX1 translocation partner 2(CBFA2T2)
LOC109061054	5.15824	2.36688	0.00143415	0.0493182	NP_071746	NECAB1	N-terminal EF-hand calcium binding protein 1(NECAB1)
LOC109061076	2.85785	1.51493	0.00563726	0.0720151	XP_011525822	lrrc4b	leucine rich repeat containing 4B(LRRC4B)
LOC109061105	0.383427	-1.38298	0.006963	0.0782432	NP_065897	SLAIN2	SLAIN motif family member 2(SLAIN2)
LOC109061118	4.44114	2.15093	0.00396145	0.0618718	XP_016868287	CADPS2	calcium dependent secretion activator 2(CADPS2)
LOC109061150	0.314438	-1.66915	0.00472904	0.0664353	-	-	-
LOC109061171	5.29201	2.40382	0.00106383	0.0480596	NP_002421	MN1	MN1 proto-oncogene, transcriptional regulator(MN1)
LOC109061197	7.36365	2.88042	0.000456257	0.0480596	NP_006329	LRRN2	leucine rich repeat neuronal 2(LRRN2)
LOC109061199	5.50124	2.45976	0.00160388	0.0506657	NP_006613	PLK2	polo like kinase 2(PLK2)
LOC109061263	0.222205	-2.17003	0.00949295	0.0906194	NP_004953	GDF10	growth differentiation factor 10(GDF10)
LOC109061320	3.02947	1.59906	0.00468411	0.0661542	NP_003177	TAGLN	transgelin(TAGLN)
LOC109061370	0.20635	-2.27683	0.00144161	0.0493182	NP_001244288	SAMD14	sterile alpha motif domain containing 14(SAMD14)
LOC109061423	3.40881	1.76927	0.00248715	0.0531336	NP_982272	DOCK8	dedicator of cytokinesis 8(DOCK8)
LOC109061527	0.18638	-2.42368	0.0016245	0.0506657	NP_001316069	PTPRF	protein tyrosine phosphatase, receptor type F(PTPRF)
LOC109061616	0.347352	-1.52553	0.00928024	0.0896479	XP_011513239	DTNBP1	dystrobrevin binding protein 1(DTNBP1)
LOC109061649	6.6757	2.73892	0.00357666	0.0601973	NP_001362321	-	-
LOC109061691	3.42546	1.7763	0.00253711	0.0534635	NP_006085	DLC1	DLC1 Rho GTPase activating protein(DLC1)
LOC109061723	0.418389	-1.25708	0.00973225	0.0921262	-	-	-
LOC109061753	0.364322	-1.45672	0.00773779	0.0821798	NP_001269707	RGS7	regulator of G-protein signaling 7(RGS7)
LOC109061823	0.118506	-3.07696	0.00143947	0.0493182	NP_940972	VWC2	von Willebrand factor C domain containing 2(VWC2)
LOC109061843	3.77717	1.91731	0.00212062	0.0513977	NP_598005	SPACA4	sperm acrosome associated 4(SPACA4)
LOC109061862	0.0890251	-3.48964	0.000319464	0.0480596	NP_543013	SRMS	src-related kinase lacking C-terminal regulatory tyrosine and N-terminal myristylation sites(SRMS)
LOC109061870	3.45269	1.78772	0.00367663	0.0607068	NP_001268432	SLITRK1	SLIT and NTRK like family member 1(SLITRK1)
LOC109061873	2.93341	1.55258	0.00541195	0.0710577	NP_001268432	SLITRK1	SLIT and NTRK like family member 1(SLITRK1)
LOC109061883	4.33217	2.11509	0.00341811	0.0596567	XP_005264018	NPAS2	neuronal PAS domain protein 2(NPAS2)
LOC109061887	119.129	6.89638	0.000208665	0.0480596	NP_543140	RLN3	relaxin 3(RLN3)
LOC109061898	3.85162	1.94547	0.00383388	0.0610756	NP_001317701	CNKSR2	connector enhancer of kinase suppressor of Ras 2(CNKSR2)
LOC109061912	3.69466	1.88544	0.00405531	0.0623941	-	-	-
LOC109061956	5.04901	2.336	0.000969125	0.0480596	NP_004758	GPR37L1	G protein-coupled receptor 37 like 1(GPR37L1)
LOC109061972	2.81217	1.49168	0.00767853	0.0818868	NP_006079	TUBB4B	tubulin beta 4B class IVb(TUBB4B)
LOC109061977	3.07774	1.62187	0.0080538	0.0839999	NP_071738	GLIPR2	GLI pathogenesis related 2(GLIPR2)
LOC109062032	2.75786	1.46355	0.00786391	0.0830558	NP_001138462	NWD2	NACHT and WD repeat domain containing 2(NWD2)
LOC109062062	2.666	1.41468	0.00658305	0.076307	NP_001672	ATP2A2	ATPase sarcoplasmic/endoplasmic reticulum Ca2+ transporting 2(ATP2A2)
LOC109062146	4.29368	2.10222	0.00226214	0.0523301	NP_064548	SEMA3G	semaphorin 3G(SEMA3G)
LOC109062179	0.405549	-1.30205	0.00929721	0.0896721	NP_002019	FNTB	farnesyltransferase, CAAX box, beta(FNTB)
LOC109062259	3.39701	1.76426	0.00332495	0.0596567	XP_005246291	CALCRL	calcitonin receptor like receptor(CALCRL)
LOC109062260	2.72173	1.44452	0.00709065	0.078867	NP_001316168	TFPI	tissue factor pathway inhibitor(TFPI)
LOC109062263	4.99609	2.3208	0.00107472	0.0480596	NP_000709	CACNA1B	calcium voltage-gated channel subunit alpha1 B(CACNA1B)
LOC109062266	4.29395	2.10231	0.00136768	0.0493182	NP_004243	SLC9A3R1	SLC9A3 regulator 1(SLC9A3R1)
LOC109062276	3.11903	1.6411	0.00471263	0.066295	NP_079469	HSD3B7	hydroxy-delta-5-steroid dehydrogenase, 3 beta- and steroid delta-isomerase 7(HSD3B7)
LOC109062288	3.0272	1.59798	0.00557755	0.0719517	NP_002961	SAT1	spermidine/spermine N1-acetyltransferase 1(SAT1)
LOC109062300	3.63738	1.8629	0.00228515	0.0524021	NP_150094	CSMD1	CUB and Sushi multiple domains 1(CSMD1)
LOC109062325	3.68409	1.88131	0.00227972	0.0524021	NP_001128711	LDHA	lactate dehydrogenase A(LDHA)
LOC109062375	2.54077	1.34527	0.00767928	0.0818868	NP_060345	SLC25A38	solute carrier family 25 member 38(SLC25A38)
LOC109062377	3.02778	1.59826	0.00432224	0.0636549	NP_060345	SLC25A38	solute carrier family 25 member 38(SLC25A38)
LOC109062418	4.89328	2.2908	0.00322469	0.0591158	-	-	-
LOC109062446	0.263134	-1.92613	0.00211403	0.0513804	NP_001308766	CA8	carbonic anhydrase 8(CA8)
LOC109062472	4.85192	2.27855	0.002302	0.0524021	XP_024303762	-	-
LOC109062480	0.232234	-2.10635	0.00599566	0.0735347	NP_001438	FAT2	FAT atypical cadherin 2(FAT2)
LOC109062492	0.199005	-2.32912	0.00138176	0.0493182	XP_016877404	TMEM266	transmembrane protein 266(TMEM266)
LOC109062529	0.298991	-1.74183	0.00481954	0.067179	XP_016877404	TMEM266	transmembrane protein 266(TMEM266)
LOC109062576	2.75935	1.46433	0.00962965	0.0914546	NP_001138590	GRID2IP	Grid2 interacting protein(GRID2IP)
LOC109062609	5.54362	2.47083	0.000774894	0.0480596	NP_003704	PLPP3	phospholipid phosphatase 3(PLPP3)
LOC109062610	0.251638	-1.99058	0.00336634	0.0596567	NP_073581	c16orf58	chromosome 16 open reading frame 58(C16orf58)
LOC109062622	8.69185	3.11966	0.000382417	0.0480596	NP_000825	GRIN2B	glutamate ionotropic receptor NMDA type subunit 2B(GRIN2B)
LOC109062728	0.287954	-1.79609	0.00555066	0.0717839	NP_064611	PRDM8	PR/SET domain 8(PRDM8)
LOC109062737	2.74288	1.45569	0.00600999	0.0735347	NP_001020331	ADGRE5	adhesion G protein-coupled receptor E5(ADGRE5)
LOC109062785	0.332891	-1.58688	0.00659155	0.076307	NP_054860	CNTNAP2	contactin associated protein-like 2(CNTNAP2)
LOC109062871	0.347671	-1.5242	0.00825257	0.0846491	XP_016875493	TMTC1	transmembrane and tetratricopeptide repeat containing 1(TMTC1)
LOC109062957	0.19998	-2.32207	0.00141528	0.0493182	XP_016876131	enox1	ecto-NOX disulfide-thiol exchanger 1(ENOX1)
LOC109062961	0.322566	-1.63234	0.00411336	0.0627161	NP_588614	PLCD3	phospholipase C delta 3(PLCD3)
LOC109063048	4.23753	2.08322	0.00168142	0.0506657	NP_064554	LXN	latexin(LXN)
LOC109063076	0.222027	-2.17119	0.00153598	0.0505031	NP_006082	CORO2B	coronin 2B(CORO2B)
LOC109063084	2.84567	1.50877	0.00652744	0.0763013	NP_542119	SLC32A1	solute carrier family 32 member 1(SLC32A1)
LOC109063119	0.218177	-2.19643	0.00189764	0.0506657	NP_001362992	-	-
LOC109063138	10.8205	3.43569	0.000262449	0.0480596	NP_001357457	-	-
LOC109063167	2.37251	1.24642	0.00974857	0.092207	NP_001364955	-	-
LOC109063217	2.90171	1.5369	0.00955452	0.0910601	NP_001376374	-	-
LOC109063222	5.83633	2.54506	0.00264238	0.0546191	NP_001353190	-	-
LOC109063238	4.17666	2.06235	0.00402454	0.0622667	NP_001356420	-	-
LOC109063240	2.68231	1.42347	0.00650407	0.0761887	NP_001032416	PDE4B	phosphodiesterase 4B(PDE4B)
LOC109063242	2.69848	1.43215	0.00672008	0.0768612	NP_001284370	PDE4B	phosphodiesterase 4B(PDE4B)
LOC109063263	10.5292	3.39632	0.000287579	0.0480596	-	-	-
LOC109063298	0.325536	-1.61911	0.0042654	0.0634783	NP_001338963	-	-
LOC109063311	4.24051	2.08424	0.00311007	0.0579195	NP_065170	ASPHD2	aspartate beta-hydroxylase domain containing 2(ASPHD2)
LOC109063317	0.176898	-2.49901	0.00121806	0.0488331	NP_001265482	GRIN2C	glutamate ionotropic receptor NMDA type subunit 2C(GRIN2C)
LOC109063351	0.267061	-1.90476	0.00530093	0.0703233	NP_001124435	NEMP1	nuclear envelope integral membrane protein 1(NEMP1)
LOC109063395	2.4699	1.30445	0.00935484	0.0899394	NP_001333480	-	-
LOC109063566	3.81174	1.93045	0.00319086	0.0588346	NP_001138580	NELL2	neural EGFL like 2(NELL2)
LOC109063670	5.02476	2.32906	0.00225402	0.0523301	NP_001307076	CAMKV	CaM kinase like vesicle associated(CAMKV)
LOC109063682	8.6055	3.10526	0.00080759	0.0480596	-	-	-
LOC109063755	0.204956	-2.28662	0.00175044	0.0506657	NP_001154	APBA1	amyloid beta precursor protein binding family A member 1(APBA1)
LOC109063801	2.63714	1.39898	0.00767371	0.0818868	NP_071334	EGLN1	egl-9 family hypoxia inducible factor 1(EGLN1)
LOC109063861	0.292577	-1.77311	0.00371538	0.0609413	NP_001093422	ITPR1	inositol 1,4,5-trisphosphate receptor type 1(ITPR1)
LOC109063879	12.9856	3.69884	0.000234517	0.0480596	NP_872352	VSTM2A	V-set and transmembrane domain containing 2A(VSTM2A)
LOC109063942	0.361535	-1.46779	0.00498172	0.0681813	-	-	-
LOC109063962	2.95916	1.56519	0.00506402	0.0687006	XP_016859246	GAD1	glutamate decarboxylase 1(GAD1)
LOC109064026	2.83855	1.50515	0.00701572	0.0785034	XP_005251040	PLEC	plectin(PLEC)
LOC109064028	2.50985	1.3276	0.00993652	0.0930759	NP_958782	PLEC	plectin(PLEC)
LOC109064036	0.323369	-1.62875	0.00394033	0.0616457	NP_055306	FOXP2	forkhead box P2(FOXP2)
LOC109064065	0.100458	-3.31533	0.000777874	0.0480596	NP_001073930	UNCX	UNC homeobox(UNCX)
LOC109064087	3.67642	1.8783	0.00228899	0.0524021	NP_001104740	ARHGEF25	Rho guanine nucleotide exchange factor 25(ARHGEF25)
LOC109064094	26.0044	4.70068	0.000590693	0.0480596	NP_001039	SST	somatostatin(SST)
LOC109064110	10.6182	3.40847	0.000980355	0.0480596	NP_000432	SLC26A4	solute carrier family 26 member 4(SLC26A4)
LOC109064115	5.39524	2.43169	0.000854003	0.0480596	NP_001104740	ARHGEF25	Rho guanine nucleotide exchange factor 25(ARHGEF25)
LOC109064124	0.23255	-2.10439	0.0012473	0.0488331	NP_001085	ASIC2	acid sensing ion channel subunit 2(ASIC2)
LOC109064189	3.80123	1.92647	0.00527283	0.0702752	XP_005265184	LAMB2	laminin subunit beta 2(LAMB2)
LOC109064226	6.74155	2.75308	0.00155434	0.0505031	NP_001702	BGN	biglycan(BGN)
LOC109064243	4.05945	2.02129	0.00195281	0.0506657	NP_057427	CENPF	centromere protein F(CENPF)
LOC109064244	2.81898	1.49517	0.00681274	0.0775867	XP_011507384	CENPF	centromere protein F(CENPF)
LOC109064313	0.265008	-1.91589	0.00233329	0.0524362	XP_011519632	GRAMD2	GRAM domain containing 2(GRAMD2)
LOC109064378	5.5843	2.48138	0.00101275	0.0480596	NP_001786	CDH5	cadherin 5(CDH5)
LOC109064382	2.68904	1.42709	0.00975797	0.092249	NP_001092140	RASGRP2	RAS guanyl releasing protein 2(RASGRP2)
LOC109064386	0.251264	-1.99272	0.00183674	0.0506657	NP_001263189	RGS3	regulator of G-protein signaling 3(RGS3)
LOC109064406	2.64661	1.40415	0.00759147	0.0816565	NP_001309999	PFKP	phosphofructokinase, platelet(PFKP)
LOC109064407	0.165011	-2.59936	0.000968567	0.0480596	NP_001182207	TMEM178B	transmembrane protein 178B(TMEM178B)
LOC109064410	0.128681	-2.95813	0.000566845	0.0480596	NP_001182207	TMEM178B	transmembrane protein 178B(TMEM178B)
LOC109064489	0.341731	-1.54907	0.00882364	0.0877074	XP_016857908	TRMT1L	tRNA methyltransferase 1 like(TRMT1L)
LOC109064506	8.68129	3.11791	0.000487091	0.0480596	XP_011514751	PTPRN2	protein tyrosine phosphatase, receptor type N2(PTPRN2)
LOC109064539	4.18991	2.06692	0.00156354	0.0505031	-	-	-
LOC109064575	0.19577	-2.35277	0.00170072	0.0506657	NP_000631	IL13RA2	interleukin 13 receptor subunit alpha 2(IL13RA2)
LOC109064634	3.44455	1.78432	0.00297866	0.0572534	NP_003957	SEMA5A	semaphorin 5A(SEMA5A)
LOC109064654	0.102073	-3.29233	0.00041807	0.0480596	NP_064448	BARHL1	BarH like homeobox 1(BARHL1)
LOC109064692	0.264366	-1.91939	0.00213909	0.0514514	XP_011507384	CENPF	centromere protein F(CENPF)
LOC109064695	4.15152	2.05364	0.00349424	0.0597322	NP_037513	TRHDE	thyrotropin releasing hormone degrading enzyme(TRHDE)
LOC109064747	2.55016	1.35059	0.00917838	0.0891737	NP_001853	Cox5b	cytochrome c oxidase subunit 5B(COX5B)
LOC109064756	4.17092	2.06037	0.0030579	0.0575036	NP_003370	EZR	ezrin(EZR)
LOC109064764	0.23884	-2.06588	0.00403708	0.0623198	NP_001167635	PRRT4	proline rich transmembrane protein 4(PRRT4)
LOC109064765	0.28458	-1.81309	0.00342081	0.0596567	NP_073583	MARC1	mitochondrial amidoxime reducing component 1(MARC1)
LOC109064766	0.0499873	-4.32229	0.00190695	0.0506657	NP_004029	Amy1a	amylase, alpha 1A (salivary)(AMY1A)
LOC109064768	0.252637	-1.98486	0.00217171	0.0517113	NP_002237	KCNK3	potassium two pore domain channel subfamily K member 3(KCNK3)
LOC109064774	2.58433	1.36979	0.0083416	0.085189	XP_011541648	RGMB	repulsive guidance molecule family member b(RGMB)
LOC109064781	0.282408	-1.82415	0.00611328	0.0739425	XP_016863614	GRID2	glutamate ionotropic receptor delta type subunit 2(GRID2)
LOC109064801	2.60387	1.38066	0.00675496	0.0771324	NP_001306584	OSBPL8	oxysterol binding protein like 8(OSBPL8)
LOC109064947	0.340199	-1.55555	0.00937853	0.0899893	NP_060481	ARGLU1	arginine and glutamate rich 1(ARGLU1)
LOC109064954	0.36634	-1.44874	0.00730077	0.079913	NP_006725	HIVEP2	human immunodeficiency virus type I enhancer binding protein 2(HIVEP2)
LOC109064964	3.09275	1.62889	0.00528192	0.0702752	XP_016857975	SYDE2	synapse defective Rho GTPase homolog 2(SYDE2)
LOC109065034	4.13063	2.04636	0.0029777	0.0572534	NP_005695	PTPRU	protein tyrosine phosphatase, receptor type U(PTPRU)
LOC109065038	4.23061	2.08087	0.0019572	0.0506657	NP_000803	GABRB1	gamma-aminobutyric acid type A receptor beta1 subunit(GABRB1)
LOC109065047	0.205178	-2.28505	0.000830843	0.0480596	NP_001353387	-	-
LOC109065066	3.55381	1.82937	0.00337529	0.0596567	NP_001353608	-	-
LOC109065121	4.43001	2.14731	0.0021078	0.051344	XP_011514525	MET	MET proto-oncogene, receptor tyrosine kinase(MET)
LOC109065128	0.174468	-2.51896	0.00202543	0.0506657	NP_001269644	olfml2a	olfactomedin like 2A(OLFML2A)
LOC109065153	3.01252	1.59097	0.00426074	0.0634783	NP_001744	CAV1	caveolin 1(CAV1)
LOC109065228	0.306353	-1.70673	0.00599784	0.0735347	NP_057700	nme8	NME/NM23 family member 8(NME8)
LOC109065282	10.9338	3.45072	0.000407074	0.0480596	NP_008919	adamts1	ADAM metallopeptidase with thrombospondin type 1 motif 1(ADAMTS1)
LOC109065366	4.26971	2.09414	0.00303904	0.0575036	XP_016864881	GRIA1	glutamate ionotropic receptor AMPA type subunit 1(GRIA1)
LOC109065373	0.280796	-1.8324	0.00400461	0.0622009	-	-	-
LOC109065380	0.225834	-2.14666	0.00153269	0.0505031	NP_001316730	PLEKHG1	pleckstrin homology and RhoGEF domain containing G1(PLEKHG1)
LOC109065388	0.265097	-1.91541	0.00588034	0.0730074	NP_005452	MAFB	MAF bZIP transcription factor B(MAFB)
LOC109065448	0.345082	-1.53499	0.00645184	0.0757032	XP_024303224	-	-
LOC109065465	0.335406	-1.57602	0.00553701	0.0716743	NP_001358152	-	-
LOC109065473	0.198129	-2.33549	0.00381624	0.0610756	NP_004377	NCAN	neurocan(NCAN)
LOC109065481	3.94763	1.98099	0.00332738	0.0596567	XP_016862923	KALRN	kalirin, RhoGEF kinase(KALRN)
LOC109065496	3.41633	1.77245	0.00679813	0.077486	NP_055824	PDZRN3	PDZ domain containing ring finger 3(PDZRN3)
LOC109065506	5.05331	2.33723	0.00207813	0.0510384	NP_001375282	-	-
LOC109065511	4.28441	2.0991	0.0020934	0.0511706	NP_001129162	PENK	proenkephalin(PENK)
LOC109065517	7.99763	2.99957	0.000749187	0.0480596	NP_005293	GPR37	G protein-coupled receptor 37(GPR37)
LOC109065568	2.6088	1.38339	0.00843819	0.0857096	NP_055982	JMJD6	arginine demethylase and lysine hydroxylase(JMJD6)
LOC109065589	4.1101	2.03917	0.00142367	0.0493182	NP_001006639	RAB37	RAB37, member RAS oncogene family(RAB37)
LOC109065615	2.90189	1.53699	0.00705513	0.0786955	NP_006149	NEFL	neurofilament, light polypeptide(NEFL)
LOC109065721	0.238021	-2.07084	0.00141347	0.0493182	XP_016862847	CADPS	calcium dependent secretion activator(CADPS)
LOC109065812	4.20082	2.07067	0.00249967	0.0532786	NP_001936	HBEGF	heparin binding EGF like growth factor(HBEGF)
LOC109065814	3.668	1.87499	0.00303183	0.0575036	XP_016860550	TMEM163	transmembrane protein 163(TMEM163)
LOC109065929	3.84123	1.94157	0.00553564	0.0716743	NP_001276627	ARHGEF3	Rho guanine nucleotide exchange factor 3(ARHGEF3)
LOC109065930	2.68902	1.42708	0.00586892	0.0730074	NP_739580	RASSF2	Ras association domain family member 2(RASSF2)
LOC109065937	0.333482	-1.58432	0.00580869	0.0727768	NP_001295114	CCNL1	cyclin L1(CCNL1)
LOC109065938	3.94376	1.97957	0.00155088	0.0505031	NP_001165095	VEGFA	vascular endothelial growth factor A(VEGFA)
LOC109065942	0.333125	-1.58587	0.00711563	0.078901	NP_001138682	ANKRD65	ankyrin repeat domain 65(ANKRD65)
LOC109065976	0.264979	-1.91605	0.00251242	0.0533574	NP_149978	c16orf45	chromosome 16 open reading frame 45(C16orf45)
LOC109065999	0.379688	-1.39711	0.00964711	0.0915737	NP_774959	RELN	reelin(RELN)
LOC109066060	10.2314	3.35494	0.00030757	0.0480596	NP_001153239	BZW2	basic leucine zipper and W2 domains 2(BZW2)
LOC109066090	11.8987	3.57273	0.000342558	0.0480596	NP_055146	SLC7A11	solute carrier family 7 member 11(SLC7A11)
LOC109066092	3.15202	1.65628	0.00330438	0.0596567	NP_001449	FLNC	filamin C(FLNC)
LOC109066121	0.361235	-1.46899	0.00812044	0.0843257	NP_005932	MMP16	matrix metallopeptidase 16(MMP16)
LOC109066144	3.24587	1.6986	0.00407566	0.062488	NP_000808	GAD1	glutamate decarboxylase 1(GAD1)
LOC109066188	3.52027	1.81568	0.00878071	0.0876066	NP_001291376	WSCD2	WSC domain containing 2(WSCD2)
LOC109066194	0.258539	-1.95155	0.00253299	0.053453	NP_005036	RELN	reelin(RELN)
LOC109066195	3.82833	1.93672	0.00288308	0.0569411	NP_078902	VTCN1	V-set domain containing T cell activation inhibitor 1(VTCN1)
LOC109066218	4.45772	2.15631	0.00382243	0.0610756	NP_002075	GPX3	glutathione peroxidase 3(GPX3)
LOC109066306	3.90551	1.96551	0.00162978	0.0506657	NP_001362916	-	-
LOC109066361	11.3477	3.50433	0.000334273	0.0480596	NP_689558	ANKRD13B	ankyrin repeat domain 13B(ANKRD13B)
LOC109066397	51.5811	5.68877	0.000401985	0.0480596	NP_065873	kcnt1	potassium sodium-activated channel subfamily T member 1(KCNT1)
LOC109066421	3.70043	1.88769	0.00410028	0.062671	NP_001271439	SLC13A5	solute carrier family 13 member 5(SLC13A5)
LOC109066484	3.59077	1.8443	0.00549712	0.0716743	NP_001273130	RERGL	RERG like(RERGL)
LOC109066502	0.274683	-1.86416	0.00241736	0.0529533	-	-	-
LOC109066507	0.312427	-1.67841	0.00513648	0.0694303	NP_001364987	-	-
LOC109066548	4.05146	2.01844	0.00390888	0.061464	NP_110419	GDPD5	glycerophosphodiester phosphodiesterase domain containing 5(GDPD5)
LOC109066560	0.0205094	-5.60757	0.000285224	0.0480596	NP_066305	TLX3	T-cell leukemia homeobox 3(TLX3)
LOC109066584	9.99593	3.32134	0.000670228	0.0480596	NP_001273130	RERGL	RERG like(RERGL)
LOC109066617	2.79473	1.48271	0.0058187	0.0727768	NP_001177779	CNOT4	CCR4-NOT transcription complex subunit 4(CNOT4)
LOC109066635	3.999	1.99964	0.00416128	0.0627773	NP_150094	CSMD1	CUB and Sushi multiple domains 1(CSMD1)
LOC109066650	6.17513	2.62647	0.000917461	0.0480596	NP_001273130	RERGL	RERG like(RERGL)
LOC109066715	5.97217	2.57826	0.00112571	0.0480596	NP_001239002	slc9a3r2	SLC9A3 regulator 2(SLC9A3R2)
LOC109066892	3.99707	1.99894	0.00179651	0.0506657	NP_003128	SRPK1	SRSF protein kinase 1(SRPK1)
LOC109066895	6.2948	2.65416	0.0006276	0.0480596	NP_001164232	SRPK3	SRSF protein kinase 3(SRPK3)
LOC109066905	6.05563	2.59828	0.000939352	0.0480596	NP_775101	SLITRK4	SLIT and NTRK like family member 4(SLITRK4)
LOC109066919	32.3472	5.01557	0.000230565	0.0480596	NP_001025176	CPLX3	complexin 3(CPLX3)
LOC109066966	2.65463	1.40851	0.00823024	0.0846491	NP_002244	KDR	kinase insert domain receptor(KDR)
LOC109067066	86.3592	6.43228	6.05e-05	0.0480596	NP_940686	KCTD4	potassium channel tetramerization domain containing 4(KCTD4)
LOC109067126	0.159811	-2.64556	0.000915803	0.0480596	XP_016861614	NECTIN3	nectin cell adhesion molecule 3(NECTIN3)
LOC109067130	0.266556	-1.90749	0.00553268	0.0716743	XP_016861614	NECTIN3	nectin cell adhesion molecule 3(NECTIN3)
LOC109067154	32.3203	5.01437	0.00012751	0.0480596	NP_001353621	-	-
LOC109067183	0.301863	-1.72803	0.00310173	0.0578685	XP_006715723	THSD7A	thrombospondin type 1 domain containing 7A(THSD7A)
LOC109067215	0.283869	-1.8167	0.00375533	0.0609413	XP_006717900	ABLIM1	actin binding LIM protein 1(ABLIM1)
LOC109067302	0.394494	-1.34192	0.00945283	0.0904357	NP_003738	TNKS	tankyrase(TNKS)
LOC109067314	0.110202	-3.18178	0.0021451	0.0515101	NP_008875	SPP2	secreted phosphoprotein 2(SPP2)
LOC109067324	0.375042	-1.41487	0.00750581	0.0811063	NP_003738	TNKS	tankyrase(TNKS)
LOC109067364	0.205483	-2.28291	0.00131397	0.0493182	NP_003364	VCL	vinculin(VCL)
LOC109067475	3.86515	1.95052	0.00176823	0.0506657	NP_002233	KCNJ13	potassium voltage-gated channel subfamily J member 13(KCNJ13)
LOC109067619	3.54677	1.8265	0.00430632	0.0636549	NP_036381	RHOQ	ras homolog family member Q(RHOQ)
LOC109067621	2.8894	1.53077	0.00803718	0.0839328	NP_001231627	ZFP36L1	ZFP36 ring finger protein like 1(ZFP36L1)
LOC109067684	3.24001	1.696	0.00364626	0.0606468	NP_004558	PFKFB4	6-phosphofructo-2-kinase/fructose-2,6-biphosphatase 4(PFKFB4)
LOC109067730	0.312871	-1.67636	0.00309116	0.0578641	NP_002490	NEO1	neogenin 1(NEO1)
LOC109067819	4.0874	2.03118	0.00392993	0.0615347	NP_057331	IMPG2	interphotoreceptor matrix proteoglycan 2(IMPG2)
LOC109067945	4.01395	2.00502	0.00174071	0.0506657	NP_006673	FGL2	fibrinogen like 2(FGL2)
LOC109067953	0.239681	-2.06081	0.00252828	0.053453	NP_001353732	-	-
LOC109067975	0.16002	-2.64367	0.00379662	0.0610756	NP_009057	VCP	valosin containing protein(VCP)
LOC109068019	0.339386	-1.559	0.00429513	0.0636549	NP_116784	BAD	BCL2 associated agonist of cell death(BAD)
LOC109068027	0.34036	-1.55487	0.00505153	0.0687006	XP_011522555	PLCD3	phospholipase C delta 3(PLCD3)
LOC109068096	62.5381	5.96666	7.96e-05	0.0480596	NP_078902	VTCN1	V-set domain containing T cell activation inhibitor 1(VTCN1)
LOC109068127	0.188514	-2.40725	0.00383469	0.0610756	-	-	-
LOC109068128	5.24794	2.39175	0.000852941	0.0480596	NP_006071	SEMA3A	semaphorin 3A(SEMA3A)
LOC109068163	2.77567	1.47284	0.00585366	0.0730074	NP_001018070	AIFM3	apoptosis inducing factor, mitochondria associated 3(AIFM3)
LOC109068228	4.63977	2.21405	0.00290837	0.0569411	XP_011543830	NHS	NHS actin remodeling regulator(NHS)
LOC109068231	5.33423	2.41528	0.00203058	0.0507263	NP_001278797	NHS	NHS actin remodeling regulator(NHS)
LOC109068254	0.266755	-1.90641	0.00371895	0.0609413	NP_055467	IPO13	importin 13(IPO13)
LOC109068327	0.308724	-1.69561	0.00455163	0.065201	NP_005094	FEZ1	fasciculation and elongation protein zeta 1(FEZ1)
LOC109068395	0.244058	-2.03471	0.00195542	0.0506657	NP_005094	FEZ1	fasciculation and elongation protein zeta 1(FEZ1)
LOC109068400	5.13844	2.36133	0.0035288	0.0598414	NP_116116	INA	internexin neuronal intermediate filament protein alpha(INA)
LOC109068432	4.46718	2.15936	0.00366477	0.0607068	NP_001358099	-	-
LOC109068452	10.4267	3.38221	0.00155003	0.0505031	NP_001334179	-	-
LOC109068519	0.374117	-1.41844	0.0078786	0.0831165	NP_001242993	CNTN1	contactin 1(CNTN1)
LOC109068532	0.347584	-1.52457	0.00517367	0.0696847	NP_116262	UBASH3B	ubiquitin associated and SH3 domain containing B(UBASH3B)
LOC109068535	0.251345	-1.99226	0.00243236	0.0529533	NP_001157865	MTF2	metal response element binding transcription factor 2(MTF2)
LOC109068581	3.22604	1.68976	0.00436028	0.0637448	XP_011511488	PHC3	polyhomeotic homolog 3(PHC3)
LOC109068611	3.24387	1.69772	0.00941736	0.0902687	NP_004065	COX8A	cytochrome c oxidase subunit 8A(COX8A)
LOC109068615	3.70616	1.88993	0.00601381	0.0735347	XP_016872355	NRP1	neuropilin 1(NRP1)
LOC109068636	3.66336	1.87317	0.00255321	0.0536203	NP_006463	TXNIP	thioredoxin interacting protein(TXNIP)
LOC109068637	4.97671	2.31519	0.00122282	0.0488331	NP_006463	TXNIP	thioredoxin interacting protein(TXNIP)
LOC109068688	0.104042	-3.26476	0.000453565	0.0480596	NP_938022	GPRIN3	GPRIN family member 3(GPRIN3)
LOC109068704	2.72414	1.4458	0.00980931	0.092391	NP_001361720	-	-
LOC109068749	3.1245	1.64363	0.00762025	0.0817725	NP_001069	VCAM1	vascular cell adhesion molecule 1(VCAM1)
LOC109068823	0.142031	-2.81573	0.00125119	0.0488331	NP_001288099	SHF	Src homology 2 domain containing F(SHF)
LOC109068842	6.07411	2.60267	0.000588652	0.0480596	NP_001274692	NSG1	neuron specific gene family member 1(NSG1)
LOC109068852	0.197283	-2.34166	0.000919496	0.0480596	NP_000831	GRM3	glutamate metabotropic receptor 3(GRM3)
LOC109068889	3.38823	1.76053	0.00441082	0.0642472	XP_011536654	asic1	acid sensing ion channel subunit 1(ASIC1)
LOC109068908	5.23929	2.38937	0.00161975	0.0506657	NP_001165644	CSRNP3	cysteine and serine rich nuclear protein 3(CSRNP3)
LOC109068912	6.12503	2.61472	0.00160474	0.0506657	NP_001165644	CSRNP3	cysteine and serine rich nuclear protein 3(CSRNP3)
LOC109068936	5.01087	2.32506	0.00111601	0.0480596	NP_001287664	RASGEF1B	RasGEF domain family member 1B(RASGEF1B)
LOC109068950	12.2942	3.61991	0.000506702	0.0480596	-	-	-
LOC109068994	7.00625	2.80864	0.00107082	0.0480596	NP_001002295	GATA3	GATA binding protein 3(GATA3)
LOC109069008	0.366449	-1.44832	0.00563649	0.0720151	XP_011515590	OSGIN2	oxidative stress induced growth inhibitor family member 2(OSGIN2)
LOC109069028	0.183908	-2.44294	0.00128261	0.0493182	-	-	-
LOC109069098	0.371564	-1.42832	0.00589847	0.0730506	NP_001238937	LUZP2	leucine zipper protein 2(LUZP2)
LOC109069167	0.349852	-1.51518	0.0061163	0.0739425	NP_006572	FUT9	fucosyltransferase 9(FUT9)
LOC109069215	0.076766	-3.70339	0.000609335	0.0480596	NP_001353210	-	-
LOC109069404	3.14663	1.65381	0.0087725	0.0876066	NP_378667	COL4A6	collagen type IV alpha 6 chain(COL4A6)
LOC109069459	0.306637	-1.7054	0.00293619	0.0570454	XP_011543433	ANO1	anoctamin 1(ANO1)
LOC109069508	5.08065	2.34501	0.00131	0.0493182	NP_055146	SLC7A11	solute carrier family 7 member 11(SLC7A11)
LOC109069533	6.5134	2.70341	0.000540292	0.0480596	XP_011507700	OLFML2B	olfactomedin like 2B(OLFML2B)
LOC109069551	3.0124	1.59091	0.00373535	0.0609413	NP_002094	GYS1	glycogen synthase 1(GYS1)
LOC109069552	0.147661	-2.75964	0.00103806	0.0480596	NP_065079	SLC17A6	solute carrier family 17 member 6(SLC17A6)
LOC109069589	30.6514	4.93788	0.000424425	0.0480596	NP_000721	CCKAR	cholecystokinin A receptor(CCKAR)
LOC109069640	6.44344	2.68783	0.000896772	0.0480596	NP_001785	CDH4	cadherin 4(CDH4)
LOC109069654	3.34718	1.74295	0.0036319	0.0605958	NP_001020775	ARRDC2	arrestin domain containing 2(ARRDC2)
LOC109069686	4.08698	2.03103	0.00309054	0.0578641	NP_001193928	CIT	citron rho-interacting serine/threonine kinase(CIT)
LOC109069714	3.15805	1.65903	0.00326766	0.0596567	XP_011537209	PPFIA2	PTPRF interacting protein alpha 2(PPFIA2)
LOC109069768	0.332294	-1.58947	0.00825239	0.0846491	NP_001129145	ATL2	atlastin GTPase 2(ATL2)
LOC109069810	0.290577	-1.78301	0.00303131	0.0575036	NP_001358013	-	-
LOC109069830	0.366945	-1.44636	0.0064195	0.0755623	NP_443112	PIK3IP1	phosphoinositide-3-kinase interacting protein 1(PIK3IP1)
LOC109069907	3.6837	1.88115	0.00216713	0.051705	NP_001230209	ALCAM	activated leukocyte cell adhesion molecule(ALCAM)
LOC109069915	0.225317	-2.14997	0.00136344	0.0493182	NP_005452	MAFB	MAF bZIP transcription factor B(MAFB)
LOC109070020	4.87402	2.28511	0.000901333	0.0480596	NP_004454	FGD1	FYVE, RhoGEF and PH domain containing 1(FGD1)
LOC109070025	5.76485	2.52728	0.000710834	0.0480596	NP_001371283	-	-
LOC109070180	4.28718	2.10003	0.00311714	0.0579931	NP_006530	CACNG3	calcium voltage-gated channel auxiliary subunit gamma 3(CACNG3)
LOC109070211	8.58312	3.1015	0.000320579	0.0480596	NP_001184249	MCL1	BCL2 family apoptosis regulator(MCL1)
LOC109070302	0.363687	-1.45923	0.00661825	0.076307	XP_011521267	GSE1	Gse1 coiled-coil protein(GSE1)
LOC109070453	7.69194	2.94335	0.00727927	0.0798742	NP_683694	NPB	neuropeptide B(NPB)
LOC109070550	0.290438	-1.7837	0.00230843	0.0524021	NP_001363793	-	-
LOC109070575	3.38515	1.75922	0.00416483	0.0627798	XP_016883770	DSCAM	DS cell adhesion molecule(DSCAM)
LOC109070614	6.15757	2.62236	0.00114534	0.0480596	NP_006025	TP53I11	tumor protein p53 inducible protein 11(TP53I11)
LOC109070736	4.00686	2.00247	0.00185218	0.0506657	NP_001274692	NSG1	neuron specific gene family member 1(NSG1)
LOC109070743	7.00954	2.80932	0.000595605	0.0480596	NP_001076003	CA10	carbonic anhydrase 10(CA10)
LOC109071000	0.332611	-1.58809	0.0087844	0.0876066	XP_011543428	ANO1	anoctamin 1(ANO1)
LOC109071050	3.37954	1.75683	0.00841607	0.0856633	NP_066363	ZNFX1	zinc finger NFX1-type containing 1(ZNFX1)
LOC109071095	0.058252	-4.10155	0.000218462	0.0480596	NP_001417	EN1	engrailed homeobox 1(EN1)
LOC109071096	2.86431	1.51819	0.00544739	0.0713497	NP_951009	MKNK2	MAP kinase interacting serine/threonine kinase 2(MKNK2)
LOC109071112	2.65933	1.41106	0.00957778	0.0911736	NP_000144	GALC	galactosylceramidase(GALC)
LOC109071138	2.5471	1.34885	0.00814983	0.0843803	NP_001356803	-	-
LOC109071173	2.78124	1.47573	0.00529243	0.0702752	NP_997263	C15orf52	chromosome 15 open reading frame 52(C15orf52)
LOC109071177	5.22048	2.38418	0.00177206	0.0506657	NP_001288197	Inafm2	InaF motif containing 2(INAFM2)
LOC109071195	2.64745	1.4046	0.00687726	0.0778643	NP_001269264	ARHGAP45	Rho GTPase activating protein 45(ARHGAP45)
LOC109071235	3.01195	1.5907	0.00463504	0.0657609	NP_065962	PLXNA4	plexin A4(PLXNA4)
LOC109071269	3.38914	1.76092	0.00447246	0.0646888	NP_003603	SEMA7A	semaphorin 7A (John Milton Hagen blood group)(SEMA7A)
LOC109071332	4.44112	2.15092	0.00124933	0.0488331	NP_001121899	FSTL5	follistatin like 5(FSTL5)
LOC109071345	5.35537	2.42099	0.000874783	0.0480596	NP_597700	GPT2	glutamic--pyruvic transaminase 2(GPT2)
LOC109071363	0.296179	-1.75546	0.00558626	0.0719517	NP_001358098	-	-
LOC109071366	0.307928	-1.69933	0.00499663	0.0682849	-	-	-
LOC109071423	9.59695	3.26258	0.000717669	0.0480596	XP_016858648	SPEG	SPEG complex locus(SPEG)
LOC109071429	4.97147	2.31367	0.00286257	0.0569023	XP_016867226	ADCYAP1R1	ADCYAP receptor type I(ADCYAP1R1)
LOC109071488	0.0932084	-3.4234	0.00222629	0.0520475	NP_002336	LUM	lumican(LUM)
LOC109071491	0.363307	-1.46074	0.00881326	0.0877074	XP_005260741	c20orf194	chromosome 20 open reading frame 194(C20orf194)
LOC109071508	3.75996	1.91072	0.00181066	0.0506657	NP_001193944	PTPRR	protein tyrosine phosphatase, receptor type R(PTPRR)
LOC109071556	0.372466	-1.42482	0.00718777	0.0793772	NP_001363399	-	-
LOC109071576	0.117495	-3.08933	0.00577893	0.0726215	NP_001008224	C1QL4	complement C1q like 4(C1QL4)
LOC109071578	0.334893	-1.57823	0.00780103	0.0825213	NP_057224	TPPP3	tubulin polymerization promoting protein family member 3(TPPP3)
LOC109071604	0.184371	-2.43932	0.00145009	0.049352	NP_065433	ADCY2	adenylate cyclase 2(ADCY2)
LOC109071653	8.02845	3.00512	0.00101577	0.0480596	NP_000832	GRM4	glutamate metabotropic receptor 4(GRM4)
LOC109071659	5.06	2.33914	0.0019478	0.0506657	NP_004377	NCAN	neurocan(NCAN)
LOC109071717	0.235856	-2.08402	0.00486459	0.067523	NP_001192181	Rnf223	ring finger protein 223(RNF223)
LOC109071866	0.25353	-1.97977	0.00193304	0.0506657	NP_001001346	CLDN20	claudin 20(CLDN20)
LOC109071936	3.19751	1.67695	0.00877953	0.0876066	NP_001345280	-	-
LOC109071944	3.76001	1.91074	0.00520458	0.0697421	NP_002217	JAG2	jagged 2(JAG2)
LOC109071948	3.29166	1.71882	0.00345021	0.0596618	NP_065962	PLXNA4	plexin A4(PLXNA4)
LOC109071954	3.88591	1.95825	0.00193004	0.0506657	NP_001158136	MAST4	microtubule associated serine/threonine kinase family member 4(MAST4)
LOC109071964	2.57087	1.36226	0.00836811	0.0852684	XP_011513418	GPR146	G protein-coupled receptor 146(GPR146)
LOC109071965	5.66393	2.5018	0.00300566	0.0574839	NP_002959	SALL1	spalt like transcription factor 1(SALL1)
LOC109072027	0.126703	-2.98047	0.00295496	0.0571507	NP_940972	VWC2	von Willebrand factor C domain containing 2(VWC2)
LOC109072029	3.83549	1.93941	0.0020228	0.0506657	NP_001171595	ABI1	abl interactor 1(ABI1)
LOC109072149	0.0813476	-3.61976	0.000354143	0.0480596	NP_115899	PARD6G	par-6 family cell polarity regulator gamma(PARD6G)
LOC109072190	0.164009	-2.60815	0.000863018	0.0480596	NP_006151	NEUROD2	neuronal differentiation 2(NEUROD2)
LOC109072229	2.78522	1.47779	0.00654419	0.076307	NP_000890	KITLG	KIT ligand(KITLG)
LOC109072245	0.399056	-1.32534	0.00882331	0.0877074	NP_060292	KANSL2	KAT8 regulatory NSL complex subunit 2(KANSL2)
LOC109072257	2.80942	1.49027	0.00548764	0.0716245	NP_001937	DUSP6	dual specificity phosphatase 6(DUSP6)
LOC109072258	3.53525	1.82181	0.00444482	0.0645401	NP_000890	KITLG	KIT ligand(KITLG)
LOC109072273	3.30117	1.72298	0.00859985	0.0866794	NP_055721	PPM1E	protein phosphatase, Mg2+/Mn2+ dependent 1E(PPM1E)
LOC109072303	5.81069	2.53871	0.000636265	0.0480596	XP_011514750	PTPRN2	protein tyrosine phosphatase, receptor type N2(PTPRN2)
LOC109072314	3.39338	1.76272	0.00617837	0.0741804	NP_002816	PTN	pleiotrophin(PTN)
LOC109072348	0.402064	-1.3145	0.00892277	0.0879178	NP_001122098	SPIRE1	spire type actin nucleation factor 1(SPIRE1)
LOC109072438	6.68449	2.74082	0.000907447	0.0480596	XP_016865171	RASGRF2	Ras protein specific guanine nucleotide releasing factor 2(RASGRF2)
LOC109072451	3.292	1.71897	0.00347386	0.0597059	XP_005248100	ATP8A1	ATPase phospholipid transporting 8A1(ATP8A1)
LOC109072460	2.58739	1.3715	0.00816445	0.0843962	XP_016856289	KIAA1107	KIAA1107(KIAA1107)
LOC109072467	4.08578	2.03061	0.00164897	0.0506657	NP_001231902	NRP1	neuropilin 1(NRP1)
LOC109072492	2.78945	1.47998	0.00601026	0.0735347	NP_002323	LRP1	LDL receptor related protein 1(LRP1)
LOC109072493	4.29483	2.1026	0.00134567	0.0493182	NP_055407	KCNIP1	potassium voltage-gated channel interacting protein 1(KCNIP1)
LOC109072494	0.0360821	-4.79257	0.000609666	0.0480596	NP_066305	TLX3	T-cell leukemia homeobox 3(TLX3)
LOC109072516	8.00589	3.00106	0.000422696	0.0480596	XP_016867964	PTPRN2	protein tyrosine phosphatase, receptor type N2(PTPRN2)
LOC109072596	2.58016	1.36746	0.00849469	0.0860863	NP_001341375	-	-
LOC109072705	18.9872	4.24696	0.000281206	0.0480596	NP_542174	VSTM2L	V-set and transmembrane domain containing 2 like(VSTM2L)
LOC109072760	4.30233	2.10512	0.00376088	0.0609413	NP_001257624	ARHGAP12	Rho GTPase activating protein 12(ARHGAP12)
LOC109072795	2.84959	1.51076	0.00631182	0.0750509	NP_003371	VIM	vimentin(VIM)
LOC109072910	3.71048	1.8916	0.00537873	0.0709504	XP_011533055	CSMD1	CUB and Sushi multiple domains 1(CSMD1)
LOC109072936	3.27966	1.71355	0.00691448	0.078119	XP_005252887	SWAP70	SWAP switching B-cell complex 70kDa subunit(SWAP70)
LOC109072970	2.99056	1.58041	0.00812354	0.0843257	NP_071414	CLSTN2	calsyntenin 2(CLSTN2)
LOC109072975	3.36535	1.75076	0.00636318	0.0753148	XP_011515850	SNTG1	syntrophin gamma 1(SNTG1)
LOC109073032	0.338912	-1.56102	0.00453873	0.0651403	NP_602299	RGS3	regulator of G-protein signaling 3(RGS3)
LOC109073043	0.280048	-1.83626	0.00636606	0.0753148	NP_001295118	CPEB4	cytoplasmic polyadenylation element binding protein 4(CPEB4)
LOC109073114	4.50678	2.1721	0.00125861	0.0488362	NP_001138648	SHISA7	shisa family member 7(SHISA7)
LOC109073133	4.15371	2.0544	0.00402693	0.0622667	NP_542197	COL11A1	collagen type XI alpha 1 chain(COL11A1)
LOC109073163	4.45146	2.15428	0.00240537	0.0529533	NP_001949	EEF1A2	eukaryotic translation elongation factor 1 alpha 2(EEF1A2)
LOC109073164	3.24158	1.6967	0.00391359	0.0614861	NP_001184038	SCHIP1	schwannomin interacting protein 1(SCHIP1)
LOC109073213	0.055693	-4.16636	0.000324693	0.0480596	NP_000788	DRD4	dopamine receptor D4(DRD4)
LOC109073215	3.20207	1.679	0.00298929	0.0573956	NP_056535	PODXL2	podocalyxin like 2(PODXL2)
LOC109073298	0.259067	-1.9486	0.00276243	0.0559898	NP_002513	NPTX1	neuronal pentraxin 1(NPTX1)
LOC109073324	2.6731	1.41851	0.00815382	0.0843803	NP_002584	PCOLCE	procollagen C-endopeptidase enhancer(PCOLCE)
LOC109073404	2.72491	1.44621	0.00885072	0.0877331	-	-	-
LOC109073419	5.40369	2.43395	0.00172379	0.0506657	NP_001295282	RAMP1	receptor activity modifying protein 1(RAMP1)
LOC109073547	3.87381	1.95375	0.00169942	0.0506657	XP_016861848	LHFPL4	lipoma HMGIC fusion partner-like 4(LHFPL4)
LOC109073562	6.33366	2.66304	0.00186542	0.0506657	NP_000586	LTA	lymphotoxin alpha(LTA)
LOC109073759	7.75562	2.95524	0.000427882	0.0480596	NP_060496	PACS1	phosphofurin acidic cluster sorting protein 1(PACS1)
LOC109073770	15.2948	3.93497	0.000286357	0.0480596	NP_060496	PACS1	phosphofurin acidic cluster sorting protein 1(PACS1)
LOC109073809	2.78918	1.47984	0.00553436	0.0716743	NP_006013	TSC22D1	TSC22 domain family member 1(TSC22D1)
LOC109073820	0.188517	-2.40724	0.00378735	0.0610756	NP_001438	FAT2	FAT atypical cadherin 2(FAT2)
LOC109073892	7.37713	2.88306	0.000554277	0.0480596	XP_011541328	KIRREL3	kin of IRRE like 3 (Drosophila)(KIRREL3)
LOC109073893	3.23814	1.69517	0.00363782	0.0605958	XP_011541334	KIRREL3	kin of IRRE like 3 (Drosophila)(KIRREL3)
LOC109073946	3.6058	1.85032	0.00358382	0.0601973	NP_001182613	TGFBR3	transforming growth factor beta receptor 3(TGFBR3)
LOC109073990	5.40342	2.43387	0.00176929	0.0506657	NP_001123467	KCTD15	potassium channel tetramerization domain containing 15(KCTD15)
LOC109074008	2.86246	1.51725	0.00750508	0.0811063	NP_001760	CD9	CD9 molecule(CD9)
LOC109074034	3.26642	1.70771	0.00335789	0.0596567	NP_000430	pcsk1	proprotein convertase subtilisin/kexin type 1(PCSK1)
LOC109074049	2.56436	1.3586	0.00913211	0.0889567	-	-	-
LOC109074064	2.84097	1.50639	0.00532235	0.0705069	XP_005252553	PRKCQ	protein kinase C theta(PRKCQ)
LOC109074105	0.247768	-2.01294	0.00172069	0.0506657	XP_006713876	KALRN	kalirin, RhoGEF kinase(KALRN)
LOC109074184	0.326593	-1.61443	0.00367781	0.0607068	NP_659443	SUSD3	sushi domain containing 3(SUSD3)
LOC109074188	8.76432	3.13164	0.000504264	0.0480596	NP_001309747	UNC5D	unc-5 netrin receptor D(UNC5D)
LOC109074270	4.05886	2.02108	0.00143246	0.0493182	NP_002917	RGS12	regulator of G-protein signaling 12(RGS12)
LOC109074298	5.68759	2.50782	0.000998544	0.0480596	NP_000413	krt17	keratin 17(KRT17)
LOC109074334	4.60489	2.20317	0.00156003	0.0505031	NP_004438	EPS8	epidermal growth factor receptor pathway substrate 8(EPS8)
LOC109074521	35.2907	5.14122	8.96e-05	0.0480596	XP_016881049	cbln2	cerebellin 2 precursor(CBLN2)
LOC109074525	2.58728	1.37143	0.00995683	0.0930781	NP_444274	EGLN2	egl-9 family hypoxia inducible factor 2(EGLN2)
LOC109074617	7.75256	2.95467	0.00202015	0.0506657	NP_001129162	PENK	proenkephalin(PENK)
LOC109074644	3.45094	1.78699	0.00378802	0.0610756	NP_004408	DUSP1	dual specificity phosphatase 1(DUSP1)
LOC109074660	0.273882	-1.86837	0.00284831	0.0567402	XP_011519934	NEO1	neogenin 1(NEO1)
LOC109074670	6.28087	2.65096	0.000706434	0.0480596	NP_000600	CXCL12	C-X-C motif chemokine ligand 12(CXCL12)
LOC109074671	6.11256	2.61178	0.00087035	0.0480596	NP_000600	CXCL12	C-X-C motif chemokine ligand 12(CXCL12)
LOC109074696	0.316599	-1.65927	0.00381231	0.0610756	NP_001001346	CLDN20	claudin 20(CLDN20)
LOC109074700	3.14737	1.65415	0.00375468	0.0609413	NP_001243222	KRT8	keratin 8(KRT8)
LOC109074705	2.76879	1.46925	0.00558556	0.0719517	NP_001243222	KRT8	keratin 8(KRT8)
LOC109074718	3.07827	1.62212	0.0048872	0.0675714	NP_001243211	KRT8	keratin 8(KRT8)
LOC109074743	0.320192	-1.64299	0.00388852	0.0613258	NP_001034548	ELMO1	engulfment and cell motility 1(ELMO1)
LOC109074771	0.0502061	-4.31599	0.00428735	0.0636549	XP_005267003	GRIK2	glutamate ionotropic receptor kainate type subunit 2(GRIK2)
LOC109074772	0.0339637	-4.87986	0.00305609	0.0575036	XP_005267003	GRIK2	glutamate ionotropic receptor kainate type subunit 2(GRIK2)
LOC109074820	0.284012	-1.81597	0.00556317	0.0718534	NP_001288197	Inafm2	InaF motif containing 2(INAFM2)
LOC109074865	4.24397	2.08542	0.00122567	0.0488331	NP_001166932	SHISA6	shisa family member 6(SHISA6)
LOC109074923	42.3198	5.40326	0.000117379	0.0480596	NP_065079	SLC17A6	solute carrier family 17 member 6(SLC17A6)
LOC109074957	7.07382	2.82249	0.00124907	0.0488331	XP_011512207	LDB2	LIM domain binding 2(LDB2)
LOC109075029	0.311912	-1.68079	0.00708303	0.0788529	XP_011513528	HECW1	HECT, C2 and WW domain containing E3 ubiquitin protein ligase 1(HECW1)
LOC109075054	0.299493	-1.73941	0.00381748	0.0610756	XP_016875477	DUSP16	dual specificity phosphatase 16(DUSP16)
LOC109075125	4.31657	2.10989	0.00196715	0.0506657	NP_000590	IGFBP5	insulin like growth factor binding protein 5(IGFBP5)
LOC109075211	2.80629	1.48866	0.00881289	0.0877074	XP_011514857	ZAN	zonadhesin (gene/pseudogene)(ZAN)
LOC109075307	3.98264	1.99372	0.00191798	0.0506657	NP_001070711	GRIA4	glutamate ionotropic receptor AMPA type subunit 4(GRIA4)
LOC109075387	0.249287	-2.00412	0.00426214	0.0634783	NP_001129162	PENK	proenkephalin(PENK)
LOC109075467	0.377354	-1.40601	0.00958044	0.0911736	XP_016862382	CCNL1	cyclin L1(CCNL1)
LOC109075469	4.1794	2.0633	0.00400221	0.0622009	NP_001531	HSPB1	heat shock protein family B (small) member 1(HSPB1)
LOC109075514	2.82781	1.49969	0.00960008	0.0912853	XP_011514358	GPR22	G protein-coupled receptor 22(GPR22)
LOC109075517	11.5957	3.53551	0.000452736	0.0480596	NP_000833	GRM5	glutamate metabotropic receptor 5(GRM5)
LOC109075523	3.97313	1.99028	0.0046445	0.0657947	NP_002023	FTH1	ferritin heavy chain 1(FTH1)
LOC109075524	6.0243	2.59079	0.00767701	0.0818868	NP_002023	FTH1	ferritin heavy chain 1(FTH1)
LOC109075533	2.99704	1.58354	0.00565413	0.0720766	XP_024304643	-	-
LOC109075542	0.269476	-1.89177	0.00229729	0.0524021	NP_001363814	-	-
LOC109075589	0.36268	-1.46323	0.00617161	0.0741804	NP_001375332	-	-
LOC109075681	0.329598	-1.60122	0.00610055	0.0739425	NP_001257697	STRIP1	striatin interacting protein 1(STRIP1)
LOC109075706	0.312312	-1.67894	0.00447785	0.0647165	-	-	-
LOC109075741	0.214929	-2.21807	0.00207171	0.0510384	NP_001371280	-	-
LOC109075753	0.250079	-1.99954	0.00301319	0.0574839	XP_016875496	TMTC1	transmembrane and tetratricopeptide repeat containing 1(TMTC1)
LOC109075757	0.23624	-2.08168	0.00275413	0.0558823	XP_016869681	UNC13B	unc-13 homolog B(UNC13B)
LOC109075768	0.23901	-2.06486	0.0015719	0.050633	XP_016877714	UNC13C	unc-13 homolog C(UNC13C)
LOC109075781	0.153223	-2.7063	0.00143974	0.0493182	NP_057171	WNT16	Wnt family member 16(WNT16)
LOC109075833	18.9645	4.24523	0.000145476	0.0480596	NP_940686	KCTD4	potassium channel tetramerization domain containing 4(KCTD4)
LOC109075966	4.18956	2.0668	0.00344037	0.0596618	NP_001231902	NRP1	neuropilin 1(NRP1)
LOC109075980	2.68864	1.42688	0.00693478	0.0781291	NP_002528	OAZ2	ornithine decarboxylase antizyme 2(OAZ2)
LOC109076026	6.2888	2.65278	0.000684794	0.0480596	NP_001356325	-	-
LOC109076128	3.34045	1.74004	0.00865498	0.0869521	NP_001353	DIO3	deiodinase, iodothyronine type III(DIO3)
LOC109076312	3.20888	1.68207	0.00773068	0.0821798	NP_001129941	TMEM108	transmembrane protein 108(TMEM108)
LOC109076406	0.260777	-1.93911	0.00197735	0.0506657	NP_036413	KCND2	potassium voltage-gated channel subfamily D member 2(KCND2)
LOC109076527	5.16748	2.36946	0.000939148	0.0480596	XP_016884158	HIC2	HIC ZBTB transcriptional repressor 2(HIC2)
LOC109076566	10.3837	3.37625	0.000698553	0.0480596	XP_005249000	scube3	signal peptide, CUB domain and EGF like domain containing 3(SCUBE3)
LOC109076567	0.295642	-1.75808	0.00600583	0.0735347	XP_006715474	SYNE1	spectrin repeat containing nuclear envelope protein 1(SYNE1)
LOC109076569	3.30235	1.72349	0.00417008	0.0627973	XP_016869220	CSMD1	CUB and Sushi multiple domains 1(CSMD1)
LOC109076590	0.258078	-1.95412	0.0020831	0.0510772	XP_011537898	HERC4	HECT and RLD domain containing E3 ubiquitin protein ligase 4(HERC4)
LOC109076596	0.244288	-2.03335	0.00423968	0.063445	NP_001030086	KCNIP3	potassium voltage-gated channel interacting protein 3(KCNIP3)
LOC109076608	0.215714	-2.21281	0.00733425	0.0801039	NP_001271353	MYRIP	myosin VIIA and Rab interacting protein(MYRIP)
LOC109076642	28.6629	4.84111	0.000334313	0.0480596	NP_001955	EGR1	early growth response 1(EGR1)
LOC109076650	0.336866	-1.56975	0.00459568	0.0654523	NP_001189487	CHURC1-FNTB	CHURC1-FNTB readthrough(CHURC1-FNTB)
LOC109076737	0.206465	-2.27603	0.0033767	0.0596567	XP_016873611	ROBO3	roundabout guidance receptor 3(ROBO3)
LOC109076754	3.06299	1.61494	0.00897626	0.0880384	XP_011536094	CIT	citron rho-interacting serine/threonine kinase(CIT)
LOC109076976	4.83272	2.27284	0.00304864	0.0575036	NP_005293	GPR37	G protein-coupled receptor 37(GPR37)
LOC109077003	4.35111	2.12138	0.00122344	0.0488331	XP_006724642	IQSEC2	IQ motif and Sec7 domain 2(IQSEC2)
LOC109077052	4.84046	2.27514	0.00242909	0.0529533	NP_775766	PTCHD1	patched domain containing 1(PTCHD1)
LOC109077134	2.7827	1.47648	0.00835115	0.085189	XP_024303752	-	-
LOC109077165	0.348626	-1.52025	0.00583061	0.0728768	-	-	-
LOC109077166	0.283585	-1.81815	0.00375295	0.0609413	-	-	-
LOC109077176	2.75319	1.4611	0.00656761	0.076307	XP_016873759	AHNAK	AHNAK nucleoprotein(AHNAK)
LOC109077178	12.4975	3.64357	0.000537003	0.0480596	XP_016880920	TBKBP1	TBK1 binding protein 1(TBKBP1)
LOC109077181	19.3472	4.27406	0.000171308	0.0480596	NP_001365167	-	-
LOC109077323	16.8237	4.07242	0.000276124	0.0480596	XP_011517896	CAMK1D	calcium/calmodulin dependent protein kinase ID(CAMK1D)
LOC109077355	2.89544	1.53378	0.00623817	0.0746668	NP_001035751	SLC29A4	solute carrier family 29 member 4(SLC29A4)
LOC109077426	17.7225	4.14751	0.000256734	0.0480596	NP_001308653	LOC645177	uncharacterized LOC645177(LOC645177)
LOC109077438	28.478	4.83178	9.78e-05	0.0480596	NP_001308653	LOC645177	uncharacterized LOC645177(LOC645177)
LOC109077504	5.87766	2.55524	0.000611652	0.0480596	NP_001295196	PTPRN2	protein tyrosine phosphatase, receptor type N2(PTPRN2)
LOC109078018	4.70807	2.23514	0.00127622	0.0493134	NP_001155291	MYO1B	myosin IB(MYO1B)
LOC109078057	3.97026	1.98923	0.00195152	0.0506657	NP_001268695	EPHA5	EPH receptor A5(EPHA5)
LOC109078064	0.103464	-3.27279	0.00046349	0.0480596	NP_001354552	-	-
LOC109078135	0.316557	-1.65946	0.00327655	0.0596567	NP_602299	RGS3	regulator of G-protein signaling 3(RGS3)
LOC109078178	7.19718	2.84743	0.000431814	0.0480596	NP_061931	DDIT4	DNA damage inducible transcript 4(DDIT4)
LOC109078195	3.52442	1.81739	0.0026364	0.0546191	NP_997460	MAP6	microtubule associated protein 6(MAP6)
LOC109078272	0.363738	-1.45903	0.00684675	0.0775937	NP_065073	ARFGEF3	ARFGEF family member 3(ARFGEF3)
LOC109078335	0.288448	-1.79362	0.00345079	0.0596618	NP_001093422	ITPR1	inositol 1,4,5-trisphosphate receptor type 1(ITPR1)
LOC109078352	2.51849	1.33256	0.00978672	0.092333	-	-	-
LOC109078405	0.345494	-1.53327	0.00561045	0.0720151	XP_011532365	NR2C2	nuclear receptor subfamily 2 group C member 2(NR2C2)
LOC109078476	5.84804	2.54795	0.000714458	0.0480596	NP_001375388	-	-
LOC109078490	4.42872	2.14689	0.00338518	0.0596567	NP_997460	MAP6	microtubule associated protein 6(MAP6)
LOC109078561	9.19268	3.20049	0.000617594	0.0480596	NP_001362741	-	-
LOC109078604	0.225095	-2.15139	0.0035727	0.0601973	NP_001438	FAT2	FAT atypical cadherin 2(FAT2)
LOC109078605	0.360723	-1.47104	0.00884104	0.0877307	NP_005554	STMN1	stathmin 1(STMN1)
LOC109078619	0.124179	-3.0095	0.000665333	0.0480596	NP_056133	ARHGEF18	Rho/Rac guanine nucleotide exchange factor 18(ARHGEF18)
LOC109078681	3.72245	1.89625	0.00471424	0.066295	NP_001192223	CACNA1E	calcium voltage-gated channel subunit alpha1 E(CACNA1E)
LOC109078802	2.68735	1.42618	0.00609012	0.0739425	NP_001093590	ECE2	endothelin converting enzyme 2(ECE2)
LOC109078804	2.58722	1.3714	0.00721429	0.0795772	NP_001106820	ECE1	endothelin converting enzyme 1(ECE1)
LOC109078837	0.137732	-2.86007	0.00207877	0.0510384	NP_705932	SLC24A4	solute carrier family 24 member 4(SLC24A4)
LOC109078846	4.4762	2.16227	0.00170607	0.0506657	NP_001180276	MEF2C	myocyte enhancer factor 2C(MEF2C)
LOC109078897	3.34091	1.74024	0.00263924	0.0546191	NP_001349894	-	-
LOC109078907	0.342959	-1.54389	0.00981772	0.092391	NP_001275902	ADAM12	ADAM metallopeptidase domain 12(ADAM12)
LOC109078959	3.37162	1.75344	0.00241863	0.0529533	NP_004064	PLK3	polo like kinase 3(PLK3)
LOC109079002	0.293318	-1.76946	0.0073871	0.0803991	XP_011532504	CADPS	calcium dependent secretion activator(CADPS)
LOC109079003	0.22077	-2.17938	0.00160025	0.0506657	XP_011532504	CADPS	calcium dependent secretion activator(CADPS)
LOC109079069	2.76795	1.46882	0.00561609	0.0720151	NP_005159	RND3	Rho family GTPase 3(RND3)
LOC109079096	0.250748	-1.99569	0.00222283	0.052032	XP_016862924	KALRN	kalirin, RhoGEF kinase(KALRN)
LOC109079097	10.0985	3.33607	0.000327648	0.0480596	XP_005249000	scube3	signal peptide, CUB domain and EGF like domain containing 3(SCUBE3)
LOC109079112	2.86436	1.51821	0.00521516	0.0698335	NP_001177411	PCSK5	proprotein convertase subtilisin/kexin type 5(PCSK5)
LOC109079125	25.8311	4.69104	0.000249926	0.0480596	NP_000611	NOS1	nitric oxide synthase 1(NOS1)
LOC109079156	12.9051	3.68987	0.000260617	0.0480596	NP_001191142	NOS1	nitric oxide synthase 1(NOS1)
LOC109079157	0.283601	-1.81807	0.00264791	0.0546217	NP_689613	C4orf32	chromosome 4 open reading frame 32(C4orf32)
LOC109079181	0.257175	-1.95918	0.00188629	0.0506657	XP_016866010	RIMS1	regulating synaptic membrane exocytosis 1(RIMS1)
LOC109079204	4.63437	2.21237	0.00119772	0.0483929	NP_001165094	VEGFA	vascular endothelial growth factor A(VEGFA)
LOC109079226	68.6998	6.10223	0.000170598	0.0480596	NP_001073935	BTBD17	BTB domain containing 17(BTBD17)
LOC109079318	3.06557	1.61616	0.00825992	0.0846491	NP_065761	LRRC47	leucine rich repeat containing 47(LRRC47)
LOC109079420	3.42741	1.77712	0.00753961	0.0813298	NP_009208	EXOC3	exocyst complex component 3(EXOC3)
LOC109079467	28.9322	4.8546	0.000271179	0.0480596	NP_001129735	C2CD4C	C2 calcium dependent domain containing 4C(C2CD4C)
LOC109079510	2.86008	1.51606	0.00684025	0.0775937	XP_011520149	IGDCC4	immunoglobulin superfamily DCC subclass member 4(IGDCC4)
LOC109079710	0.235332	-2.08723	0.00140306	0.0493182	NP_997253	GPR153	G protein-coupled receptor 153(GPR153)
LOC109079848	3.16342	1.66148	0.00325107	0.0594729	NP_001161792	TSPAN9	tetraspanin 9(TSPAN9)
LOC109079850	0.289394	-1.78889	0.0056108	0.0720151	NP_001310434	OSMR	oncostatin M receptor(OSMR)
LOC109079860	0.105702	-3.24192	0.000664106	0.0480596	NP_001156624	ETV1	ETS variant 1(ETV1)
LOC109079881	7.2407	2.85613	0.000443404	0.0480596	XP_016880920	TBKBP1	TBK1 binding protein 1(TBKBP1)
LOC109079883	0.132273	-2.91841	0.000581203	0.0480596	-	-	-
LOC109079987	3.1201	1.64159	0.00405412	0.0623941	XP_005251041	PLEC	plectin(PLEC)
LOC109079991	3.49337	1.80462	0.00239354	0.0529533	NP_109590	RAI1	retinoic acid induced 1(RAI1)
LOC109080000	2.86844	1.52027	0.0076048	0.0817331	XP_016867944	FAM20C	FAM20C, golgi associated secretory pathway kinase(FAM20C)
LOC109080095	3.27575	1.71183	0.00520446	0.0697421	NP_002023	FTH1	ferritin heavy chain 1(FTH1)
LOC109080132	5.45653	2.44798	0.000758743	0.0480596	NP_005731	DNAL4	dynein axonemal light chain 4(DNAL4)
LOC109080153	10.2124	3.35225	0.000686867	0.0480596	NP_000825	GRIN2B	glutamate ionotropic receptor NMDA type subunit 2B(GRIN2B)
LOC109080154	2.44621	1.29055	0.00977336	0.0922766	NP_001310303	CAMK4	calcium/calmodulin dependent protein kinase IV(CAMK4)
LOC109080156	0.187675	-2.41369	0.0010315	0.0480596	XP_016861313	DLG1	discs large MAGUK scaffold protein 1(DLG1)
LOC109080208	9.00147	3.17016	0.000675578	0.0480596	NP_001073984	FAM163B	family with sequence similarity 163 member B(FAM163B)
LOC109080214	13.0376	3.70461	0.000212661	0.0480596	NP_001073984	FAM163B	family with sequence similarity 163 member B(FAM163B)
LOC109080232	0.34127	-1.55101	0.00990969	0.0928802	NP_001309968	SV2B	synaptic vesicle glycoprotein 2B(SV2B)
LOC109080282	0.150817	-2.72913	0.000607945	0.0480596	NP_001372230	-	-
LOC109080288	9.04738	3.1775	0.0017696	0.0506657	NP_001350918	-	-
LOC109080344	0.223745	-2.16008	0.00254645	0.0535995	-	-	-
LOC109080345	0.366299	-1.44891	0.00525735	0.0702261	-	-	-
LOC109080440	0.356164	-1.48939	0.00777578	0.0823949	NP_064448	BARHL1	BarH like homeobox 1(BARHL1)
LOC109080452	10.4035	3.379	0.0010138	0.0480596	NP_001172030	CD22	CD22 molecule(CD22)
LOC109080485	3.55243	1.82881	0.00738844	0.0803991	XP_016874227	CIT	citron rho-interacting serine/threonine kinase(CIT)
LOC109080495	20.6074	4.36509	0.000250804	0.0480596	NP_004282	CARTPT	CART prepropeptide(CARTPT)
LOC109080536	0.185065	-2.4339	0.000899859	0.0480596	NP_001372552	-	-
LOC109080634	3.90382	1.96489	0.00237623	0.0529533	NP_003460	SCG2	secretogranin II(SCG2)
LOC109080636	3.22915	1.69116	0.00503732	0.068639	NP_542402	KCNE4	potassium voltage-gated channel subfamily E regulatory subunit 4(KCNE4)
LOC109080642	0.230044	-2.12002	0.00110175	0.0480596	NP_001186704	CPD	carboxypeptidase D(CPD)
LOC109080669	3.3783	1.7563	0.00597182	0.0735347	NP_001009944	PKD1	polycystin 1, transient receptor potential channel interacting(PKD1)
LOC109080706	0.26921	-1.8932	0.00702922	0.0785599	-	-	-
LOC109080757	6.41613	2.6817	0.000963077	0.0480596	NP_001358202	-	-
LOC109080760	3.03551	1.60194	0.00425536	0.0634783	NP_065433	ADCY2	adenylate cyclase 2(ADCY2)
LOC109080764	0.346705	-1.52822	0.00535005	0.0706919	NP_001358152	-	-
LOC109080771	4.10705	2.0381	0.00162395	0.0506657	XP_016855574	TXNIP	thioredoxin interacting protein(TXNIP)
LOC109080798	2.78568	1.47803	0.00853926	0.0863967	NP_001158509	GABRA5	gamma-aminobutyric acid type A receptor alpha5 subunit(GABRA5)
LOC109080805	7.02028	2.81153	0.000710129	0.0480596	-	-	-
LOC109080828	3.07218	1.61926	0.00398871	0.0621421	NP_001310003	PFKP	phosphofructokinase, platelet(PFKP)
LOC109080888	43.5055	5.44313	0.000108275	0.0480596	NP_065079	SLC17A6	solute carrier family 17 member 6(SLC17A6)
LOC109081399	3.09549	1.63017	0.00349525	0.0597322	NP_001369680	-	-
LOC109081426	3.65867	1.87132	0.00276899	0.0560615	NP_000823	GRIN1	glutamate ionotropic receptor NMDA type subunit 1(GRIN1)
LOC109081444	0.386196	-1.37259	0.00860917	0.0866794	NP_001098721	ZFYVE16	zinc finger FYVE-type containing 16(ZFYVE16)
LOC109081495	0.271879	-1.87896	0.00400073	0.0622009	NP_543150	ASB5	ankyrin repeat and SOCS box containing 5(ASB5)
LOC109081503	3.84126	1.94158	0.00568769	0.0722537	NP_001335916	-	-
LOC109081523	0.326592	-1.61444	0.00931868	0.0897859	-	-	-
LOC109081536	0.400286	-1.3209	0.00793965	0.0833708	NP_002881	RASA1	RAS p21 protein activator 1(RASA1)
LOC109081644	2.77866	1.47439	0.00996586	0.0930781	NP_006071	SEMA3A	semaphorin 3A(SEMA3A)
LOC109081693	0.342806	-1.54454	0.00508802	0.0689584	XP_024309105	-	-
LOC109081702	0.214394	-2.22167	0.00151766	0.0503701	NP_689603	TMEM178A	transmembrane protein 178A(TMEM178A)
LOC109081779	4.99146	2.31946	0.00189899	0.0506657	-	-	-
LOC109081849	0.235566	-2.0858	0.00240589	0.0529533	NP_001193871	CSPG5	chondroitin sulfate proteoglycan 5(CSPG5)
LOC109081852	2.93472	1.55322	0.00922577	0.0893554	XP_024306209	-	-
LOC109081955	0.148953	-2.74707	0.0019286	0.0506657	-	-	-
LOC109081972	0.271134	-1.88292	0.00227428	0.0524021	NP_001138682	ANKRD65	ankyrin repeat domain 65(ANKRD65)
LOC109081993	3.83306	1.9385	0.00175605	0.0506657	NP_000256	NCF1	neutrophil cytosolic factor 1(NCF1)
LOC109082000	3.20635	1.68093	0.00909771	0.0888078	XP_011525699	CNFN	cornifelin(CNFN)
LOC109082010	0.303064	-1.72231	0.00872361	0.0874463	XP_005273079	SDCCAG8	serologically defined colon cancer antigen 8(SDCCAG8)
LOC109082029	4.12791	2.04541	0.00423422	0.0634143	-	-	-
LOC109082054	3.65731	1.87078	0.00321764	0.0591158	XP_011513418	GPR146	G protein-coupled receptor 146(GPR146)
LOC109082209	0.260331	-1.94158	0.00572479	0.072383	NP_001918	DES	desmin(DES)
LOC109082279	2.89859	1.53535	0.00928887	0.0896721	NP_006460	IVNS1ABP	influenza virus NS1A binding protein(IVNS1ABP)
LOC109082296	2.97474	1.57276	0.00477331	0.0667546	XP_011514358	GPR22	G protein-coupled receptor 22(GPR22)
LOC109082360	2.8225	1.49698	0.00908916	0.0887709	NP_001792	CDO1	cysteine dioxygenase type 1(CDO1)
LOC109082370	5.95832	2.57491	0.000713185	0.0480596	NP_001792	CDO1	cysteine dioxygenase type 1(CDO1)
LOC109082517	3.25824	1.70409	0.00518798	0.0697421	-	-	-
LOC109082626	21.6752	4.43797	0.000231676	0.0480596	NP_004813	NTN1	netrin 1(NTN1)
LOC109082700	5.1219	2.35668	0.0022499	0.0523301	NP_001186792	KCNAB2	potassium voltage-gated channel subfamily A regulatory beta subunit 2(KCNAB2)
LOC109082736	2.93044	1.55112	0.0058886	0.0730188	NP_443094	RCSD1	RCSD domain containing 1(RCSD1)
LOC109082806	12.575	3.65249	0.000404424	0.0480596	NP_919260	CLDN23	claudin 23(CLDN23)
LOC109082849	36.5923	5.19347	0.000176958	0.0480596	NP_006276	TESK1	testis-specific kinase 1(TESK1)
LOC109082856	5.08781	2.34705	0.00100104	0.0480596	NP_006276	TESK1	testis-specific kinase 1(TESK1)
LOC109082959	2.42235	1.27641	0.0091249	0.0889567	NP_001161792	TSPAN9	tetraspanin 9(TSPAN9)
LOC109082968	5.46175	2.44936	0.00133814	0.0493182	XP_016860301	TNS1	tensin 1(TNS1)
LOC109082997	0.386523	-1.37137	0.00744134	0.0808916	NP_001356609	-	-
LOC109083034	5.69198	2.50893	0.000915161	0.0480596	NP_477520	ANTXR2	anthrax toxin receptor 2(ANTXR2)
LOC109083036	6.32114	2.66018	0.000563452	0.0480596	NP_001287664	RASGEF1B	RasGEF domain family member 1B(RASGEF1B)
LOC109083061	0.139634	-2.84028	0.00288933	0.0569411	XP_016873621	EPS8L2	EPS8 like 2(EPS8L2)
LOC109083102	3.9536	1.98317	0.00201061	0.0506657	NP_001375332	-	-
LOC109083134	2.68227	1.42346	0.00894516	0.0879178	NP_113600	GABARAPL1	GABA type A receptor associated protein like 1(GABARAPL1)
LOC109083135	5.44556	2.44508	0.000708363	0.0480596	NP_001307488	CSRNP1	cysteine and serine rich nuclear protein 1(CSRNP1)
LOC109083138	4.56886	2.19183	0.00123187	0.0488331	NP_001338078	-	-
LOC109083144	2.75902	1.46416	0.00668862	0.0766901	NP_001334596	-	-
LOC109083188	0.201165	-2.31355	0.00218907	0.0518058	XP_011517414	NTNG2	netrin G2(NTNG2)
LOC109083221	6.40555	2.67932	0.00113503	0.0480596	NP_001271438	SLC13A5	solute carrier family 13 member 5(SLC13A5)
LOC109083303	0.0173061	-5.85258	0.000662233	0.0480596	NP_001223	CASQ2	calsequestrin 2(CASQ2)
LOC109083336	3.18884	1.67303	0.00464367	0.0657947	NP_001276041	CPNE4	copine 4(CPNE4)
LOC109083342	6.02905	2.59193	0.000636981	0.0480596	NP_001272808	CEBPB	CCAAT/enhancer binding protein beta(CEBPB)
LOC109083348	3.67159	1.8764	0.00529029	0.0702752	NP_001263424	psg4	pregnancy specific beta-1-glycoprotein 4(PSG4)
LOC109083354	4.34689	2.11999	0.00670056	0.0767323	NP_112185	TMEM163	transmembrane protein 163(TMEM163)
LOC109083365	0.30507	-1.71279	0.00503263	0.0686328	NP_001158309	FXYD6	FXYD domain containing ion transport regulator 6(FXYD6)
LOC109083439	3.49902	1.80695	0.00688319	0.0778643	XP_011531277	PRKCE	protein kinase C epsilon(PRKCE)
LOC109083464	5.65958	2.50069	0.00109905	0.0480596	NP_057064	HMP19	HMP19 protein(HMP19)
LOC109083500	3.01211	1.59078	0.00765567	0.0818868	XP_016873143	b4galnt4	beta-1,4-N-acetyl-galactosaminyltransferase 4(B4GALNT4)
LOC109083501	0.261513	-1.93504	0.00261847	0.0543765	NP_055159	fjx1	four jointed box 1(FJX1)
LOC109083632	0.354445	-1.49637	0.00473972	0.0664721	NP_116586	PCDH10	protocadherin 10(PCDH10)
LOC109083642	3.68063	1.87995	0.00388199	0.0613258	NP_852091	CCDC39	coiled-coil domain containing 39(CCDC39)
LOC109083647	6.68438	2.74079	0.000503973	0.0480596	XP_011529234	NHSL2	NHS like 2(NHSL2)
LOC109083654	0.388311	-1.36472	0.00997374	0.0931049	NP_001358656	-	-
LOC109083780	2.96285	1.56699	0.00413995	0.0627773	NP_001138648	SHISA7	shisa family member 7(SHISA7)
LOC109083883	3.16218	1.66092	0.00452125	0.0651031	NP_000691	ANXA1	annexin A1(ANXA1)
LOC109083949	3.06042	1.61373	0.00643541	0.0756373	NP_001304335	SLC6A11	solute carrier family 6 member 11(SLC6A11)
LOC109083952	20.6821	4.37031	0.000185021	0.0480596	NP_001307076	CAMKV	CaM kinase like vesicle associated(CAMKV)
LOC109084013	11.3653	3.50656	0.0010015	0.0480596	NP_005321	HBE1	hemoglobin subunit epsilon 1(HBE1)
LOC109084074	0.215145	-2.21662	0.00542127	0.0710577	NP_063938	CYP26B1	cytochrome P450 family 26 subfamily B member 1(CYP26B1)
LOC109084168	0.271968	-1.87849	0.00590952	0.0730768	XP_011533321	MTUS2	microtubule associated tumor suppressor candidate 2(MTUS2)
LOC109084202	0.21135	-2.2423	0.00165341	0.0506657	NP_001273747	KLF5	Kruppel like factor 5(KLF5)
LOC109084261	0.173808	-2.52443	0.0011259	0.0480596	NP_002561	PCSK6	proprotein convertase subtilisin/kexin type 6(PCSK6)
LOC109084315	0.294567	-1.76333	0.00859694	0.0866794	NP_001316069	PTPRF	protein tyrosine phosphatase, receptor type F(PTPRF)
LOC109084316	3.87988	1.95601	0.0024858	0.0531336	NP_000370	XDH	xanthine dehydrogenase(XDH)
LOC109084329	0.0627399	-3.99447	0.000399672	0.0480596	NP_001291277	OLFM2	olfactomedin 2(OLFM2)
LOC109084333	3.75976	1.91064	0.00315838	0.058526	NP_001127911	PHLDB2	pleckstrin homology like domain family B member 2(PHLDB2)
LOC109084345	0.365013	-1.45398	0.00569524	0.0722537	NP_001267471	DPF3	double PHD fingers 3(DPF3)
LOC109084421	0.178432	-2.48656	0.00133427	0.0493182	NP_001350794	-	-
LOC109084499	2.79234	1.48147	0.00937588	0.0899893	NP_001822	CLU	clusterin(CLU)
LOC109084538	4.2427	2.08498	0.00242543	0.0529533	NP_005518	HSPA1L	heat shock protein family A (Hsp70) member 1 like(HSPA1L)
LOC109084553	7.7153	2.94772	0.000698274	0.0480596	NP_001357457	-	-
LOC109084564	4.11251	2.04002	0.00198886	0.0506657	XP_016863883	TENM3	teneurin transmembrane protein 3(TENM3)
LOC109084597	4.26675	2.09314	0.00131117	0.0493182	NP_000819	GRIA3	glutamate ionotropic receptor AMPA type subunit 3(GRIA3)
LOC109084672	4.00755	2.00272	0.00167316	0.0506657	NP_003246	TIMP2	TIMP metallopeptidase inhibitor 2(TIMP2)
LOC109084694	3.26046	1.70508	0.00337676	0.0596567	NP_003246	TIMP2	TIMP metallopeptidase inhibitor 2(TIMP2)
LOC109084713	3.14826	1.65456	0.00560895	0.0720151	NP_001193880	SLC16A3	solute carrier family 16 member 3(SLC16A3)
LOC109084761	11.1319	3.47663	0.000275896	0.0480596	NP_001034977	ANKRD34A	ankyrin repeat domain 34A(ANKRD34A)
LOC109084802	3.46215	1.79167	0.00700691	0.0784521	NP_001305121	SLC13A4	solute carrier family 13 member 4(SLC13A4)
LOC109084841	3.40856	1.76916	0.00564125	0.0720151	XP_011536092	CIT	citron rho-interacting serine/threonine kinase(CIT)
LOC109084844	103.474	6.69313	0.000145706	0.0480596	XP_011527552	PDYN	prodynorphin(PDYN)
LOC109084856	3.13835	1.65001	0.0065066	0.0761887	NP_064707	ACKR3	atypical chemokine receptor 3(ACKR3)
LOC109084906	3.62415	1.85764	0.00697365	0.0782683	NP_065962	PLXNA4	plexin A4(PLXNA4)
LOC109084987	3.5874	1.84294	0.00231981	0.0524021	NP_001006625	PDPN	podoplanin(PDPN)
LOC109085004	3.08723	1.62631	0.00656923	0.076307	NP_835228	ANGPTL5	angiopoietin like 5(ANGPTL5)
LOC109085024	4.4442	2.15192	0.00221568	0.0519523	XP_005248100	ATP8A1	ATPase phospholipid transporting 8A1(ATP8A1)
LOC109085042	0.233016	-2.1015	0.00169215	0.0506657	NP_001316730	PLEKHG1	pleckstrin homology and RhoGEF domain containing G1(PLEKHG1)
LOC109085210	29.943	4.90415	0.000221744	0.0480596	XP_016883382	rin2	Ras and Rab interactor 2(RIN2)
LOC109085243	0.249758	-2.0014	0.00228575	0.0524021	NP_001278790	IGF2	insulin like growth factor 2(IGF2)
LOC109085244	3.64565	1.86617	0.0066076	0.076307	NP_060019	EPDR1	ependymin related 1(EPDR1)
LOC109085354	4.46945	2.1601	0.00389608	0.0613666	NP_060019	EPDR1	ependymin related 1(EPDR1)
LOC109085366	4.21151	2.07434	0.00156514	0.0505031	NP_001192223	CACNA1E	calcium voltage-gated channel subunit alpha1 E(CACNA1E)
LOC109085376	3.13474	1.64834	0.00825545	0.0846491	NP_150094	CSMD1	CUB and Sushi multiple domains 1(CSMD1)
LOC109085432	0.34624	-1.53016	0.00520284	0.0697421	NP_001309917	KALRN	kalirin, RhoGEF kinase(KALRN)
LOC109085452	3.95838	1.98491	0.00243957	0.0529712	XP_016864942	MAST4	microtubule associated serine/threonine kinase family member 4(MAST4)
LOC109085457	0.286912	-1.80132	0.00337664	0.0596567	NP_001378878	-	-
LOC109085471	0.11879	-3.07351	0.00092022	0.0480596	NP_996808	CA12	carbonic anhydrase 12(CA12)
LOC109085478	0.260253	-1.94201	0.00485878	0.0674928	NP_001337381	-	-
LOC109085536	0.318517	-1.65056	0.00426582	0.0634783	NP_001310218	CDKL5	cyclin dependent kinase like 5(CDKL5)
LOC109085598	12.5212	3.6463	0.000289832	0.0480596	NP_061054	CAMK2N1	calcium/calmodulin dependent protein kinase II inhibitor 1(CAMK2N1)
LOC109085599	3.27663	1.71221	0.00442647	0.064355	NP_001171951	CLDN7	claudin 7(CLDN7)
LOC109085632	3.46514	1.79291	0.00337075	0.0596567	NP_715637	FNDC5	fibronectin type III domain containing 5(FNDC5)
LOC109085646	3.64628	1.86643	0.00407253	0.062488	NP_116321	RAB11FIP4	RAB11 family interacting protein 4(RAB11FIP4)
LOC109085693	0.0613388	-4.02706	0.000525297	0.0480596	NP_758952	CACNA2D4	calcium voltage-gated channel auxiliary subunit alpha2delta 4(CACNA2D4)
LOC109085752	13.2052	3.72304	0.000224076	0.0480596	NP_078997	ZFHX4	zinc finger homeobox 4(ZFHX4)
LOC109085797	3.65986	1.87179	0.00191374	0.0506657	XP_005247182	CPOX	coproporphyrinogen oxidase(CPOX)
LOC109085877	4.4333	2.14838	0.00334494	0.0596567	NP_002325	LRP4	LDL receptor related protein 4(LRP4)
LOC109085880	3.1021	1.63324	0.00387456	0.0613258	NP_055453	PLCH2	phospholipase C eta 2(PLCH2)
LOC109085913	0.261843	-1.93323	0.00411287	0.0627161	NP_002098	H3F3A	H3 histone family member 3A(H3F3A)
LOC109085932	0.236297	-2.08133	0.00172565	0.0506657	NP_001258949	NRXN3	neurexin 3(NRXN3)
LOC109085933	2.8466	1.50924	0.00800347	0.0837099	-	-	-
LOC109085934	0.29742	-1.74942	0.0035131	0.0597322	NP_001258949	NRXN3	neurexin 3(NRXN3)
LOC109085952	0.365913	-1.45043	0.00634021	0.0751525	NP_003150	CDKL5	cyclin dependent kinase like 5(CDKL5)
LOC109085967	0.120373	-3.05442	0.00213989	0.0514514	-	-	-
LOC109085970	0.108445	-3.20496	0.000815289	0.0480596	NP_938022	GPRIN3	GPRIN family member 3(GPRIN3)
LOC109085999	7.3857	2.88473	0.000440311	0.0480596	XP_011514358	GPR22	G protein-coupled receptor 22(GPR22)
LOC109086029	0.280897	-1.83189	0.00541761	0.0710577	-	-	-
LOC109086048	3.30067	1.72276	0.0041572	0.0627773	NP_872333	CABP7	calcium binding protein 7(CABP7)
LOC109086066	3.50313	1.80864	0.00261409	0.0543461	NP_004064	PLK3	polo like kinase 3(PLK3)
LOC109086072	0.288497	-1.79337	0.00374668	0.0609413	NP_542780	B3GAT2	beta-1,3-glucuronyltransferase 2(B3GAT2)
LOC109086073	0.221359	-2.17554	0.00446437	0.0646724	NP_005757	FARP1	FERM, ARH/RhoGEF and pleckstrin domain protein 1(FARP1)
LOC109086101	2.8901	1.53112	0.00533232	0.0705384	XP_016870289	PCSK5	proprotein convertase subtilisin/kexin type 5(PCSK5)
LOC109086127	2.70876	1.43764	0.00755995	0.0815018	NP_001093635	PHACTR2	phosphatase and actin regulator 2(PHACTR2)
LOC109086232	0.311308	-1.68358	0.00355624	0.0601422	NP_689808	PGBD4	piggyBac transposable element derived 4(PGBD4)
LOC109086462	2.6965	1.43109	0.00725983	0.0798594	XP_016884273	CECR5	cat eye syndrome chromosome region, candidate 5(CECR5)
LOC109086531	2.94809	1.55978	0.0038798	0.0613258	NP_741994	USP2	ubiquitin specific peptidase 2(USP2)
LOC109086564	0.13544	-2.88428	0.00252579	0.053453	-	-	-
LOC109086643	3.84248	1.94204	0.001538	0.0505031	XP_005248100	ATP8A1	ATPase phospholipid transporting 8A1(ATP8A1)
LOC109086675	2.87416	1.52314	0.00599276	0.0735347	NP_065433	ADCY2	adenylate cyclase 2(ADCY2)
LOC109086677	2.93643	1.55407	0.00512863	0.0693746	NP_000282	PGK1	phosphoglycerate kinase 1(PGK1)
LOC109086784	2.82748	1.49952	0.00797064	0.0835546	NP_001239155	PLK2	polo like kinase 2(PLK2)
LOC109086852	3.48036	1.79924	0.00287296	0.0569399	NP_001098713	PCDH19	protocadherin 19(PCDH19)
LOC109086864	0.00112905	-9.79067	2.63e-05	0.0480596	XP_016880939	TMEM94	transmembrane protein 94(TMEM94)
LOC109086876	2.9455	1.55851	0.00597223	0.0735347	NP_004701	SYNGR2	synaptogyrin 2(SYNGR2)
LOC109086899	2.92613	1.549	0.00695234	0.0781707	NP_569057	COLEC12	collectin subfamily member 12(COLEC12)
LOC109086954	0.198756	-2.33093	0.0019071	0.0506657	NP_001316989	CACNB2	calcium voltage-gated channel auxiliary subunit beta 2(CACNB2)
LOC109086971	3.31952	1.73097	0.00261168	0.0543461	NP_002419	MMP15	matrix metallopeptidase 15(MMP15)
LOC109086975	2.77509	1.47253	0.00644928	0.0757032	NP_964012	SLC6A9	solute carrier family 6 member 9(SLC6A9)
LOC109087003	0.264873	-1.91663	0.00309152	0.0578641	NP_001265125	zbtb18	zinc finger and BTB domain containing 18(ZBTB18)
LOC109087058	0.264305	-1.91972	0.0017248	0.0506657	NP_004758	GPR37L1	G protein-coupled receptor 37 like 1(GPR37L1)
LOC109087189	4.33812	2.11707	0.00189995	0.0506657	NP_001291276	OLFM2	olfactomedin 2(OLFM2)
LOC109087252	7.3374	2.87527	0.000471264	0.0480596	XP_016863882	TENM3	teneurin transmembrane protein 3(TENM3)
LOC109087255	3.41953	1.7738	0.00255695	0.0536383	XP_016863882	TENM3	teneurin transmembrane protein 3(TENM3)
LOC109087256	2.73443	1.45124	0.00550971	0.0716743	NP_056372	CHD5	chromodomain helicase DNA binding protein 5(CHD5)
LOC109087274	0.323796	-1.62684	0.00442861	0.064355	XP_006716890	PTPRD	protein tyrosine phosphatase, receptor type D(PTPRD)
LOC109087373	3.91702	1.96976	0.00189465	0.0506657	XP_011516310	SLC1A1	solute carrier family 1 member 1(SLC1A1)
LOC109087388	3.72862	1.89864	0.00232025	0.0524021	NP_001192244	STEAP4	STEAP4 metalloreductase(STEAP4)
LOC109087421	0.275039	-1.86229	0.00481473	0.067179	XP_016866734	UTRN	utrophin(UTRN)
LOC109087561	3.94122	1.97864	0.00198629	0.0506657	NP_015564	GRIA3	glutamate ionotropic receptor AMPA type subunit 3(GRIA3)
LOC109087680	3.23964	1.69583	0.0036718	0.0607068	NP_001372078	-	-
LOC109087743	0.183417	-2.4468	0.00505542	0.0687006	-	-	-
LOC109087747	0.299359	-1.74005	0.00453328	0.0651124	XP_011529919	ASB5	ankyrin repeat and SOCS box containing 5(ASB5)
LOC109087762	0.36632	-1.44882	0.00578654	0.072668	NP_005676	GTF2IRD1	GTF2I repeat domain containing 1(GTF2IRD1)
LOC109087778	54.1587	5.75912	0.000116994	0.0480596	NP_001373220	-	-
LOC109087827	3.71134	1.89194	0.00301863	0.0574839	NP_848634	FAM19A2	family with sequence similarity 19 member A2, C-C motif chemokine like(FAM19A2)
LOC109087834	6.14834	2.6202	0.000632168	0.0480596	NP_008920	rasa4	RAS p21 protein activator 4(RASA4)
LOC109087885	0.298916	-1.74219	0.00503317	0.0686328	NP_009055	UTRN	utrophin(UTRN)
LOC109088014	3.58706	1.8428	0.00434537	0.0636549	XP_011543341	MAP6	microtubule associated protein 6(MAP6)
LOC109088106	0.0732321	-3.77138	0.000639823	0.0480596	NP_001355847	-	-
LOC109088199	5.40383	2.43398	0.00140501	0.0493182	NP_443202	HSPA12B	heat shock protein family A (Hsp70) member 12B(HSPA12B)
LOC109088217	6.14591	2.61963	0.00115465	0.0483229	NP_000740	CHRNB3	cholinergic receptor nicotinic beta 3 subunit(CHRNB3)
LOC109088267	108.74	6.76474	0.000159137	0.0480596	NP_000316	PITX2	paired like homeodomain 2(PITX2)
LOC109088327	3.90367	1.96483	0.00218248	0.0518054	NP_001334596	-	-
LOC109088339	5.18578	2.37456	0.00197509	0.0506657	XP_016856424	SYT14	synaptotagmin 14(SYT14)
LOC109088347	3.93012	1.97457	0.00216211	0.0516516	NP_001307130	METTL18	methyltransferase like 18(METTL18)
LOC109088462	4.79157	2.2605	0.00766602	0.0818868	NP_003986	NPR2	natriuretic peptide receptor 2(NPR2)
LOC109088464	0.203209	-2.29896	0.00173713	0.0506657	NP_055490	CROCC	ciliary rootlet coiled-coil, rootletin(CROCC)
LOC109088477	3.54851	1.82721	0.00346487	0.0597059	NP_006088	MYL9	myosin light chain 9(MYL9)
LOC109088484	2.4847	1.31307	0.00977578	0.0922766	NP_001074248	MYO1C	myosin IC(MYO1C)
LOC109088528	2.93591	1.55381	0.00398514	0.0621421	XP_006722001	RAPGEFL1	Rap guanine nucleotide exchange factor like 1(RAPGEFL1)
LOC109088548	0.257154	-1.95929	0.00462826	0.0657149	XP_011509628	PDE1A	phosphodiesterase 1A(PDE1A)
LOC109088613	3.18002	1.66904	0.00891691	0.0879178	XP_016868501	CSMD3	CUB and Sushi multiple domains 3(CSMD3)
LOC109088691	0.275382	-1.86049	0.00331744	0.0596567	NP_003081	SNRPA1	small nuclear ribonucleoprotein polypeptide A'(SNRPA1)
LOC109088706	3.94882	1.98142	0.00331112	0.0596567	XP_016874733	TRHDE	thyrotropin releasing hormone degrading enzyme(TRHDE)
LOC109088713	4.92062	2.29884	0.00119262	0.0483929	NP_037513	TRHDE	thyrotropin releasing hormone degrading enzyme(TRHDE)
LOC109088781	2.48058	1.31068	0.00918692	0.0892101	NP_001290471	RAB11FIP4	RAB11 family interacting protein 4(RAB11FIP4)
LOC109088789	4.37018	2.12769	0.00139801	0.0493182	-	-	-
LOC109088801	4.02866	2.0103	0.00295809	0.0571507	NP_001074419	MYO1C	myosin IC(MYO1C)
LOC109088811	3.26984	1.70922	0.00753722	0.0813298	NP_006770	CDC42EP2	CDC42 effector protein 2(CDC42EP2)
LOC109088905	7.41526	2.8905	0.00110032	0.0480596	NP_004282	CARTPT	CART prepropeptide(CARTPT)
LOC109088950	0.0470419	-4.40991	0.000168016	0.0480596	NP_065865	MARCH4	membrane associated ring-CH-type finger 4(MARCH4)
LOC109088990	0.187353	-2.41617	0.00155972	0.0505031	XP_006710859	PTPRF	protein tyrosine phosphatase, receptor type F(PTPRF)
LOC109088991	0.219518	-2.18759	0.00199651	0.0506657	XP_016857431	PTPRF	protein tyrosine phosphatase, receptor type F(PTPRF)
LOC109089020	2.71533	1.44113	0.00804284	0.0839328	NP_002211	ITPKA	inositol-trisphosphate 3-kinase A(ITPKA)
LOC109089175	3.207	1.68123	0.00522542	0.0699205	NP_079285	CEP135	centrosomal protein 135(CEP135)
LOC109089523	3.43241	1.77922	0.0037475	0.0609413	NP_001185774	RBM14-RBM4	RBM14-RBM4 readthrough(RBM14-RBM4)
LOC109089958	0.287253	-1.79961	0.00365134	0.0606468	XP_005266130	GRIN1	glutamate ionotropic receptor NMDA type subunit 1(GRIN1)
LOC109090124	5.66353	2.5017	0.000638015	0.0480596	NP_008920	rasa4	RAS p21 protein activator 4(RASA4)
LOC109090174	3.61333	1.85333	0.00243313	0.0529533	NP_001264006	HOMER1	homer scaffolding protein 1(HOMER1)
LOC109090239	0.30906	-1.69404	0.00429269	0.0636549	NP_001364151	-	-
LOC109090243	4.78327	2.258	0.00147891	0.0497835	NP_001278924	SGK1	serum/glucocorticoid regulated kinase 1(SGK1)
LOC109090299	0.112891	-3.147	0.000441036	0.0480596	NP_001307396	ZDHHC23	zinc finger DHHC-type containing 23(ZDHHC23)
LOC109090329	0.0347016	-4.84886	0.000470843	0.0480596	NP_001222	CASQ1	calsequestrin 1(CASQ1)
LOC109090352	0.328811	-1.60467	0.00765577	0.0818868	XP_016873228	ARNTL	aryl hydrocarbon receptor nuclear translocator like(ARNTL)
LOC109090363	0.297287	-1.75007	0.00305989	0.0575036	NP_001035037	SGSM1	small G protein signaling modulator 1(SGSM1)
LOC109090415	0.354366	-1.49669	0.00635351	0.0752622	NP_001139194	HOMER3	homer scaffolding protein 3(HOMER3)
LOC109090443	20.3854	4.34947	0.000388758	0.0480596	NP_001955	EGR1	early growth response 1(EGR1)
LOC109090510	3.33483	1.73762	0.00335446	0.0596567	XP_016871736	ABLIM1	actin binding LIM protein 1(ABLIM1)
LOC109090529	5.41652	2.43737	0.00159276	0.0506657	XP_016867896	PPP1R9A	protein phosphatase 1 regulatory subunit 9A(PPP1R9A)
LOC109090530	0.326527	-1.61473	0.00494257	0.0681314	NP_055622	C2CD2L	C2CD2 like(C2CD2L)
LOC109090573	3.36328	1.74987	0.00358541	0.0601973	NP_003003	SFRP1	secreted frizzled related protein 1(SFRP1)
LOC109090626	0.314963	-1.66675	0.00402175	0.0622667	NP_005676	GTF2IRD1	GTF2I repeat domain containing 1(GTF2IRD1)
LOC109090648	0.369269	-1.43726	0.00824126	0.0846491	XP_011517391	GARNL3	GTPase activating Rap/RanGAP domain like 3(GARNL3)
LOC109090707	0.126183	-2.98641	0.0023204	0.0524021	XP_005248321	FGF10	fibroblast growth factor 10(FGF10)
LOC109090709	7.20481	2.84896	0.00052873	0.0480596	XP_024303186	-	-
LOC109090779	0.345843	-1.53181	0.00929374	0.0896721	-	-	-
LOC109090792	0.301795	-1.72836	0.00369082	0.0607845	NP_001269540	OLFM1	olfactomedin 1(OLFM1)
LOC109090794	0.299986	-1.73703	0.00330773	0.0596567	NP_001269540	OLFM1	olfactomedin 1(OLFM1)
LOC109090799	3.0451	1.60649	0.00780054	0.0825213	-	-	-
LOC109090995	0.302489	-1.72505	0.00433765	0.0636549	NP_002514	NPTX2	neuronal pentraxin 2(NPTX2)
LOC109091012	3.45636	1.78925	0.00348695	0.0597322	NP_001193910	C4orf26	chromosome 4 open reading frame 26(C4orf26)
LOC109091018	3.16935	1.66419	0.00494637	0.0681314	-	-	-
LOC109091070	3.61115	1.85246	0.00224872	0.0523301	NP_001335182	-	-
LOC109091134	0.309634	-1.69136	0.00415252	0.0627773	NP_689982	CBARP	CACN beta subunit associated regulatory protein(CBARP)
LOC109091135	6.00914	2.58716	0.000706944	0.0480596	NP_004513	KIF5C	kinesin family member 5C(KIF5C)
LOC109091158	0.191681	-2.38322	0.00102789	0.0480596	NP_001358152	-	-
LOC109091186	11.3265	3.50163	0.000520484	0.0480596	NP_003033	SLC6A1	solute carrier family 6 member 1(SLC6A1)
LOC109091208	2.99789	1.58395	0.00667007	0.0766029	NP_001159968	SLC16A1	solute carrier family 16 member 1(SLC16A1)
LOC109091245	0.118818	-3.07318	0.000405466	0.0480596	XP_016878200	SHF	Src homology 2 domain containing F(SHF)
LOC109091310	2.86972	1.52091	0.00834679	0.085189	NP_950252	BRINP3	BMP/retinoic acid inducible neural specific 3(BRINP3)
LOC109091319	3.99501	1.9982	0.0030157	0.0574839	XP_006719071	SLC6A13	solute carrier family 6 member 13(SLC6A13)
LOC109091329	3.32846	1.73485	0.00576521	0.0726215	-	-	-
LOC109091400	0.386624	-1.371	0.00746704	0.0810044	NP_001071169	MIER1	MIER1 transcriptional regulator(MIER1)
LOC109091403	0.34973	-1.51569	0.00440629	0.0642316	NP_085128	TET1	tet methylcytosine dioxygenase 1(TET1)
LOC109091429	5.02613	2.32945	0.00120321	0.0485096	-	-	-
LOC109091438	4.69554	2.23129	0.00268936	0.0552315	NP_942153	EFCAB6	EF-hand calcium binding domain 6(EFCAB6)
LOC109091452	2.91016	1.5411	0.00567507	0.0722445	NP_003608	RGS5	regulator of G-protein signaling 5(RGS5)
LOC109091454	3.30705	1.72554	0.00517524	0.0696847	NP_001241677	RGS5	regulator of G-protein signaling 5(RGS5)
LOC109091464	3.85433	1.94648	0.00369166	0.0607845	NP_950252	BRINP3	BMP/retinoic acid inducible neural specific 3(BRINP3)
LOC109091474	3.37965	1.75687	0.00318878	0.0588346	NP_001419	ENO1	enolase 1(ENO1)
LOC109091525	4.49425	2.16808	0.00107787	0.0480596	NP_001139811	VSTM2B	V-set and transmembrane domain containing 2B(VSTM2B)
LOC109091582	2.72935	1.44856	0.00598343	0.0735347	NP_001130002	SERPINE2	serpin family E member 2(SERPINE2)
LOC109091629	0.238803	-2.06611	0.00158744	0.0506657	XP_016882044	CBARP	CACN beta subunit associated regulatory protein(CBARP)
LOC109091659	3.41042	1.76995	0.00615121	0.074054	NP_001359035	-	-
LOC109091680	3.29181	1.71888	0.00999351	0.0931702	NP_203744	MICALL1	MICAL like 1(MICALL1)
LOC109091744	0.174038	-2.52252	0.000704478	0.0480596	NP_001191198	KCNA2	potassium voltage-gated channel subfamily A member 2(KCNA2)
LOC109091786	0.334417	-1.58028	0.00417275	0.0627973	-	-	-
LOC109091787	0.379718	-1.397	0.00913783	0.0889658	XP_016884963	NHSL2	NHS like 2(NHSL2)
LOC109091823	0.227162	-2.13821	0.00203612	0.0507964	NP_001265545	BUB1	BUB1 mitotic checkpoint serine/threonine kinase(BUB1)
LOC109091825	2.89207	1.5321	0.00496959	0.0681473	NP_056978	STMN3	stathmin 3(STMN3)
LOC109091920	4.99469	2.3204	0.000951623	0.0480596	NP_001193531	CHN1	chimerin 1(CHN1)
LOC109091936	0.215982	-2.21102	0.00209517	0.0511706	NP_003364	VCL	vinculin(VCL)
LOC109091967	4.47742	2.16267	0.0040602	0.0624176	NP_391988	ITGB1	integrin subunit beta 1(ITGB1)
LOC109091977	0.146898	-2.76711	0.000848556	0.0480596	NP_001154	APBA1	amyloid beta precursor protein binding family A member 1(APBA1)
LOC109091999	2.73071	1.44927	0.00791305	0.0831942	NP_065433	ADCY2	adenylate cyclase 2(ADCY2)
LOC109092001	4.59483	2.20001	0.00286746	0.0569387	NP_001307550	GRIK1	glutamate ionotropic receptor kainate type subunit 1(GRIK1)
LOC109092015	4.76269	2.25178	0.00212201	0.0513977	NP_001128243	SLC12A5	solute carrier family 12 member 5(SLC12A5)
LOC109092078	3.01179	1.59062	0.0083429	0.085189	NP_001271272	FKBP9	FK506 binding protein 9(FKBP9)
LOC109092122	0.327345	-1.61112	0.00499367	0.0682849	NP_001161860	CITED2	Cbp/p300 interacting transactivator with Glu/Asp rich carboxy-terminal domain 2(CITED2)
LOC109092126	0.294232	-1.76497	0.00558462	0.0719517	XP_005271084	MAP7D1	MAP7 domain containing 1(MAP7D1)
LOC109092189	8.78346	3.13479	0.00189324	0.0506657	NP_001156750	TENM1	teneurin transmembrane protein 1(TENM1)
LOC109092242	0.208112	-2.26457	0.00119046	0.0483929	NP_001154	APBA1	amyloid beta precursor protein binding family A member 1(APBA1)
LOC109092287	0.308517	-1.69658	0.00344207	0.0596618	NP_004419	EFNA1	ephrin A1(EFNA1)
LOC109092323	2.58151	1.36821	0.00818328	0.08445	NP_001290471	RAB11FIP4	RAB11 family interacting protein 4(RAB11FIP4)
LOC109092347	3.69302	1.8848	0.00310421	0.0578685	NP_055416	EHD2	EH domain containing 2(EHD2)
LOC109092409	3.0861	1.62578	0.0049719	0.0681473	NP_003079	FSCN1	fascin actin-bundling protein 1(FSCN1)
LOC109092499	0.280574	-1.83355	0.0069948	0.0784109	NP_066191	B3GALT1	beta-1,3-galactosyltransferase 1(B3GALT1)
LOC109092535	0.103733	-3.26906	0.00155717	0.0505031	NP_006832	SLC38A3	solute carrier family 38 member 3(SLC38A3)
LOC109092640	5.07637	2.3438	0.00273203	0.0556174	NP_000709	CACNA1B	calcium voltage-gated channel subunit alpha1 B(CACNA1B)
LOC109092730	4.66433	2.22167	0.00107386	0.0480596	NP_004975	KIF5A	kinesin family member 5A(KIF5A)
LOC109092778	4.69009	2.22962	0.00299699	0.0574839	NP_001373664	-	-
LOC109092800	8.14685	3.02624	0.000491466	0.0480596	NP_001158238	ZFHX3	zinc finger homeobox 3(ZFHX3)
LOC109092820	2.81027	1.49071	0.00587047	0.0730074	NP_001265571	EDIL3	EGF like repeats and discoidin domains 3(EDIL3)
LOC109092867	2.60049	1.37878	0.00903411	0.0883726	NP_001280219	SPRY4	sprouty RTK signaling antagonist 4(SPRY4)
LOC109092932	0.287828	-1.79672	0.00528807	0.0702752	NP_001350597	-	-
LOC109092947	0.225889	-2.14631	0.00734728	0.0801859	NP_001242913	COLEC11	collectin subfamily member 11(COLEC11)
LOC109092950	0.0335328	-4.89828	0.000232772	0.0480596	NP_004343	CBLN1	cerebellin 1 precursor(CBLN1)
LOC109092958	2.55457	1.35308	0.00691832	0.078119	NP_001948	EDNRA	endothelin receptor type A(EDNRA)
LOC109092983	6.54929	2.71134	0.000667145	0.0480596	NP_733776	MEIS2	Meis homeobox 2(MEIS2)
LOC109092994	7.12174	2.83223	0.000819735	0.0480596	NP_000593	SERPINE1	serpin family E member 1(SERPINE1)
LOC109093092	0.403284	-1.31013	0.00982969	0.0924029	XP_016867301	DPP6	dipeptidyl peptidase like 6(DPP6)
LOC109093156	0.309231	-1.69324	0.00546038	0.0714192	-	-	-
LOC109093274	0.321132	-1.63876	0.00441915	0.0643182	XP_024305521	-	-
LOC109093281	3.39931	1.76524	0.00291463	0.0569625	NP_001760	CD9	CD9 molecule(CD9)
LOC109093306	2.73645	1.4523	0.00770044	0.0820174	NP_689935	HEPACAM	hepatic and glial cell adhesion molecule(HEPACAM)
LOC109093309	7.26021	2.86001	0.000730375	0.0480596	NP_059121	SPA17	sperm autoantigenic protein 17(SPA17)
LOC109093541	9.15463	3.1945	0.000768886	0.0480596	NP_001731	CALB2	calbindin 2(CALB2)
LOC109093599	10.9835	3.45726	0.000270708	0.0480596	XP_011534742	SLC24A4	solute carrier family 24 member 4(SLC24A4)
LOC109093628	3.80923	1.9295	0.00290792	0.0569411	NP_001307440	NMNAT3	nicotinamide nucleotide adenylyltransferase 3(NMNAT3)
LOC109093644	3.58189	1.84072	0.00413452	0.0627773	NP_001288039	ADAMTSL3	ADAMTS like 3(ADAMTSL3)
LOC109093710	5.84277	2.54665	0.000824178	0.0480596	NP_001987	FBLN1	fibulin 1(FBLN1)
LOC109093761	6.13502	2.61707	0.00257913	0.0539817	XP_011513239	DTNBP1	dystrobrevin binding protein 1(DTNBP1)
LOC109093784	2.86936	1.52073	0.00466223	0.0659955	NP_001184038	SCHIP1	schwannomin interacting protein 1(SCHIP1)
LOC109093787	3.84756	1.94395	0.00253267	0.053453	NP_597700	GPT2	glutamic--pyruvic transaminase 2(GPT2)
LOC109093820	0.240257	-2.05735	0.00206846	0.0510384	NP_036561	SEC14L2	SEC14 like lipid binding 2(SEC14L2)
LOC109093856	6.0696	2.6016	0.000621962	0.0480596	XP_016867964	PTPRN2	protein tyrosine phosphatase, receptor type N2(PTPRN2)
LOC109094046	7.14371	2.83667	0.000563619	0.0480596	NP_001035751	SLC29A4	solute carrier family 29 member 4(SLC29A4)
LOC109094047	0.210261	-2.24974	0.00826178	0.0846491	NP_063938	CYP26B1	cytochrome P450 family 26 subfamily B member 1(CYP26B1)
LOC109094109	0.187705	-2.41346	0.00247725	0.0531052	NP_001276994	ROBO2	roundabout guidance receptor 2(ROBO2)
LOC109094124	0.195283	-2.35636	0.00293913	0.0570454	NP_444277	UCN3	urocortin 3(UCN3)
LOC109094144	3.33763	1.73882	0.00369691	0.0607845	NP_060727	PCMTD2	protein-L-isoaspartate (D-aspartate) O-methyltransferase domain containing 2(PCMTD2)
LOC109094169	3.23405	1.69334	0.00361401	0.060459	NP_001300922	IGFBP2	insulin like growth factor binding protein 2(IGFBP2)
LOC109094192	4.16978	2.05997	0.00174466	0.0506657	XP_016879279	GPT2	glutamic--pyruvic transaminase 2(GPT2)
LOC109094194	3.42003	1.77401	0.00675788	0.0771324	NP_963887	CACNB2	calcium voltage-gated channel auxiliary subunit beta 2(CACNB2)
LOC109094197	6.50891	2.70242	0.0014011	0.0493182	NP_001788	CDH11	cadherin 11(CDH11)
LOC109094236	0.315215	-1.66559	0.00418783	0.062876	NP_064569	CNNM4	cyclin and CBS domain divalent metal cation transport mediator 4(CNNM4)
LOC109094327	0.0219826	-5.50749	0.0005464	0.0480596	-	-	-
LOC109094336	3.89089	1.9601	0.00458349	0.0654291	NP_060712	SLC47A1	solute carrier family 47 member 1(SLC47A1)
LOC109094348	0.301337	-1.73055	0.00358319	0.0601973	NP_569077	PTPRD	protein tyrosine phosphatase, receptor type D(PTPRD)
LOC109094393	7.00286	2.80794	0.00134184	0.0493182	NP_001295163	ERICH6	glutamate rich 6(ERICH6)
LOC109094458	3.11998	1.64154	0.00605231	0.0737627	NP_001153605	KCNQ5	potassium voltage-gated channel subfamily Q member 5(KCNQ5)
LOC109094461	2.68538	1.42512	0.00859758	0.0866794	NP_001316557	CD276	CD276 molecule(CD276)
LOC109094553	3.95965	1.98537	0.00166244	0.0506657	NP_060120	PPP1R9A	protein phosphatase 1 regulatory subunit 9A(PPP1R9A)
LOC109094554	4.55816	2.18845	0.00116616	0.0483929	NP_821079	LRRTM3	leucine rich repeat transmembrane neuronal 3(LRRTM3)
LOC109094564	0.20887	-2.25932	0.00659104	0.076307	XP_011532443	GRIP2	glutamate receptor interacting protein 2(GRIP2)
LOC109094597	5.60792	2.48747	0.000755416	0.0480596	NP_004028	AMPD2	adenosine monophosphate deaminase 2(AMPD2)
LOC109094633	0.387692	-1.36702	0.0089915	0.0880949	-	-	-
LOC109094634	3.56034	1.83201	0.00264485	0.0546191	NP_001873	CRHBP	corticotropin releasing hormone binding protein(CRHBP)
LOC109094671	3.42671	1.77682	0.00661676	0.076307	NP_001129610	RPS6KC1	ribosomal protein S6 kinase C1(RPS6KC1)
LOC109094695	3.86899	1.95196	0.00247054	0.0530224	XP_011524907	EMP3	epithelial membrane protein 3(EMP3)
LOC109094718	3.51816	1.81482	0.00528365	0.0702752	-	-	-
LOC109094745	0.163278	-2.6146	0.00240464	0.0529533	NP_000631	IL13RA2	interleukin 13 receptor subunit alpha 2(IL13RA2)
LOC109094818	0.324142	-1.6253	0.00424835	0.0634783	NP_001310878	MBD1	methyl-CpG binding domain protein 1(MBD1)
LOC109094837	5.04238	2.3341	0.00197971	0.0506657	XP_005253945	ATP2A2	ATPase sarcoplasmic/endoplasmic reticulum Ca2+ transporting 2(ATP2A2)
LOC109094842	3.75464	1.90867	0.00174044	0.0506657	NP_940685	MMD2	monocyte to macrophage differentiation associated 2(MMD2)
LOC109094866	2.52888	1.3385	0.0086401	0.0868495	NP_001374706	-	-
LOC109094910	2.73986	1.4541	0.00639271	0.075438	NP_001284598	RGL1	ral guanine nucleotide dissociation stimulator like 1(RGL1)
LOC109094933	4.68167	2.22702	0.00109233	0.0480596	XP_011540089	AJAP1	adherens junctions associated protein 1(AJAP1)
LOC109094947	9.45501	3.24108	0.0005246	0.0480596	NP_001278914	GABRP	gamma-aminobutyric acid type A receptor pi subunit(GABRP)
LOC109095036	6.16218	2.62344	0.0015944	0.0506657	NP_940685	MMD2	monocyte to macrophage differentiation associated 2(MMD2)
LOC109095056	0.264847	-1.91677	0.00215717	0.0516313	NP_002831	PTPRF	protein tyrosine phosphatase, receptor type F(PTPRF)
LOC109095064	0.0777843	-3.68438	0.000586681	0.0480596	NP_001073930	UNCX	UNC homeobox(UNCX)
LOC109095072	5.41072	2.43582	0.00166804	0.0506657	NP_001129242	PVR	poliovirus receptor(PVR)
LOC109095106	4.75582	2.24969	0.001314	0.0493182	NP_001272808	CEBPB	CCAAT/enhancer binding protein beta(CEBPB)
LOC109095160	3.926	1.97306	0.00380268	0.0610756	NP_982301	porcn	porcupine homolog (Drosophila)(PORCN)
LOC109095187	7.22151	2.8523	0.000970269	0.0480596	-	-	-
LOC109095244	3.40468	1.76752	0.00658675	0.076307	-	-	-
LOC109095266	6.90588	2.78783	0.00245896	0.0529732	NP_000207	ANOS1	anosmin 1(ANOS1)
LOC109095280	5.96611	2.57679	0.00118664	0.0483929	NP_116116	INA	internexin neuronal intermediate filament protein alpha(INA)
LOC109095283	0.325902	-1.61749	0.00654663	0.076307	NP_055108	nptxr	neuronal pentraxin receptor(NPTXR)
LOC109095289	3.57554	1.83816	0.00487042	0.0675535	XP_011515813	NKAIN3	Na+/K+ transporting ATPase interacting 3(NKAIN3)
LOC109095310	0.290152	-1.78512	0.00794712	0.0834021	NP_060146	GIN1	gypsy retrotransposon integrase 1(GIN1)
LOC109095396	6.18147	2.62795	0.000670856	0.0480596	XP_011540089	AJAP1	adherens junctions associated protein 1(AJAP1)
LOC109095399	3.37671	1.75562	0.00449384	0.0648466	NP_116116	INA	internexin neuronal intermediate filament protein alpha(INA)
LOC109095434	3.88422	1.95763	0.00244218	0.0529712	NP_001338158	-	-
LOC109095438	0.327237	-1.61159	0.00664967	0.0765742	NP_997234	PRRT3	proline rich transmembrane protein 3(PRRT3)
LOC109095479	4.04947	2.01773	0.00146331	0.0494491	NP_110433	c1orf21	chromosome 1 open reading frame 21(C1orf21)
LOC109095500	3.13778	1.64974	0.00807444	0.0841208	NP_006071	SEMA3A	semaphorin 3A(SEMA3A)
LOC109095506	7.21381	2.85076	0.000787053	0.0480596	NP_112177	LBH	limb bud and heart development(LBH)
LOC109095512	0.329255	-1.60272	0.00728016	0.0798742	NP_997000	SLC25A47	solute carrier family 25 member 47(SLC25A47)
LOC109095569	13.1461	3.71656	0.00078162	0.0480596	NP_009048	TRH	thyrotropin releasing hormone(TRH)
LOC109095575	2.72194	1.44463	0.00883999	0.0877307	NP_001034485	MPEG1	macrophage expressed 1(MPEG1)
LOC109095591	5.55234	2.4731	0.00130097	0.0493182	NP_005186	CEBPD	CCAAT/enhancer binding protein delta(CEBPD)
LOC109095592	6.40514	2.67923	0.000780634	0.0480596	NP_005186	CEBPD	CCAAT/enhancer binding protein delta(CEBPD)
LOC109095621	0.358227	-1.48106	0.0069733	0.0782683	-	-	-
LOC109095641	0.299247	-1.74059	0.00489322	0.0675714	NP_001350800	-	-
LOC109095679	0.335045	-1.57757	0.00835829	0.0852152	XP_024307880	-	-
LOC109095681	0.283004	-1.82111	0.00369888	0.0607845	NP_065073	ARFGEF3	ARFGEF family member 3(ARFGEF3)
LOC109095739	0.346656	-1.52843	0.00629319	0.0750509	NP_001165883	VANGL1	VANGL planar cell polarity protein 1(VANGL1)
LOC109095752	3.85619	1.94718	0.00313688	0.0582437	XP_011519369	NALCN	sodium leak channel, non-selective(NALCN)
LOC109095779	2.46572	1.30201	0.00906077	0.0885868	NP_061027	LRP1B	LDL receptor related protein 1B(LRP1B)
LOC109095780	0.346168	-1.53046	0.0063038	0.0750509	NP_001371818	-	-
LOC109095807	7.65651	2.93669	0.000865215	0.0480596	NP_689936	CCDC89	coiled-coil domain containing 89(CCDC89)
LOC109095835	4.79237	2.26074	0.00111256	0.0480596	NP_004377	NCAN	neurocan(NCAN)
LOC109095837	3.07928	1.62259	0.00356794	0.0601964	NP_940819	BCAN	brevican(BCAN)
LOC109095839	3.18056	1.66928	0.00392088	0.0614966	NP_001350453	-	-
LOC109095840	0.292863	-1.7717	0.00288664	0.0569411	XP_006713876	KALRN	kalirin, RhoGEF kinase(KALRN)
LOC109095854	14.9279	3.89993	0.000500651	0.0480596	NP_001353621	-	-
LOC109095871	0.236725	-2.07871	0.00123223	0.0488331	NP_001161883	RIMS1	regulating synaptic membrane exocytosis 1(RIMS1)
LOC109095873	0.239432	-2.06231	0.00205409	0.0510313	XP_016869516	RIMS2	regulating synaptic membrane exocytosis 2(RIMS2)
LOC109095879	0.334215	-1.58115	0.00650719	0.0761887	NP_001335173	-	-
LOC109095897	0.285852	-1.80666	0.00380828	0.0610756	-	-	-
LOC109095922	12.9974	3.70015	0.000407871	0.0480596	NP_003863	NRP2	neuropilin 2(NRP2)
LOC109095924	0.302842	-1.72336	0.00283308	0.0566381	NP_919226	ZNF804A	zinc finger protein 804A(ZNF804A)
LOC109095937	0.204273	-2.29143	0.000913331	0.0480596	-	-	-
LOC109096001	3.36277	1.74965	0.00760778	0.0817331	XP_016875894	GPR183	G protein-coupled receptor 183(GPR183)
LOC109096078	0.148998	-2.74663	0.000761812	0.0480596	NP_001074014	PPP1R1C	protein phosphatase 1 regulatory inhibitor subunit 1C(PPP1R1C)
LOC109096195	6.47975	2.69594	0.00155602	0.0505031	NP_000790	EPO	erythropoietin(EPO)
LOC109096214	3.12398	1.64339	0.00995881	0.0930781	NP_689540	AK7	adenylate kinase 7(AK7)
LOC109096226	0.291818	-1.77686	0.00346451	0.0597059	NP_001364148	-	-
LOC109096232	4.42032	2.14415	0.00400929	0.0622009	NP_004943	EFNA3	ephrin A3(EFNA3)
LOC109096237	2.68221	1.42342	0.00769306	0.0819858	NP_002364	MAP1A	microtubule associated protein 1A(MAP1A)
LOC109096245	0.201303	-2.31256	0.00100311	0.0480596	NP_001334899	-	-
LOC109096284	0.251562	-1.99101	0.00170583	0.0506657	NP_001339745	-	-
LOC109096314	3.79532	1.92422	0.00238952	0.0529533	XP_016876026	NALCN	sodium leak channel, non-selective(NALCN)
LOC109096326	3.85817	1.94792	0.00259746	0.0543041	XP_005249675	ADCYAP1R1	ADCYAP receptor type I(ADCYAP1R1)
LOC109096363	3.5409	1.82411	0.00409481	0.0626437	XP_016885013	MAOB	monoamine oxidase B(MAOB)
LOC109096397	2.82167	1.49655	0.0047107	0.066295	NP_004263	HOMER1	homer scaffolding protein 1(HOMER1)
LOC109096399	21.7353	4.44197	0.000178664	0.0480596	XP_016865171	RASGRF2	Ras protein specific guanine nucleotide releasing factor 2(RASGRF2)
LOC109096456	3.00858	1.58908	0.00569387	0.0722537	XP_011538087	KCNMA1	potassium calcium-activated channel subfamily M alpha 1(KCNMA1)
LOC109096478	2.84221	1.50702	0.00613644	0.0739636	NP_071451	IFIH1	interferon induced with helicase C domain 1(IFIH1)
LOC109096541	0.229025	-2.12642	0.00333728	0.0596567	NP_065173	PTGFRN	prostaglandin F2 receptor inhibitor(PTGFRN)
LOC109096548	0.219661	-2.18665	0.00128108	0.0493182	NP_001156624	ETV1	ETS variant 1(ETV1)
LOC109096554	0.187581	-2.41442	0.00611887	0.0739425	NP_001242955	ARHGAP22	Rho GTPase activating protein 22(ARHGAP22)
LOC109096562	6.3278	2.6617	0.00101442	0.0480596	NP_003458	CXCR4	C-X-C motif chemokine receptor 4(CXCR4)
LOC109096565	0.262449	-1.92989	0.00250544	0.0533404	NP_001341706	-	-
LOC109096570	3.23467	1.69362	0.00301415	0.0574839	NP_002219	JUN	Jun proto-oncogene, AP-1 transcription factor subunit(JUN)
LOC109096583	2.8734	1.52276	0.00669612	0.0767288	NP_009016	FSTL1	follistatin like 1(FSTL1)
LOC109096621	2.51579	1.33101	0.00823639	0.0846491	XP_024303908	-	-
LOC109096627	0.139293	-2.84381	0.000863476	0.0480596	NP_000802	GABRA6	gamma-aminobutyric acid type A receptor alpha6 subunit(GABRA6)
LOC109096644	0.366765	-1.44707	0.00764442	0.0818868	NP_001269855	ABI2	abl interactor 2(ABI2)
LOC109096646	0.283561	-1.81827	0.0026137	0.0543461	-	-	-
LOC109096653	0.361845	-1.46656	0.00666098	0.0766029	XP_016874555	ERC1	ELKS/RAB6-interacting/CAST family member 1(ERC1)
LOC109096687	3.08523	1.62538	0.00611435	0.0739425	NP_002957	S100A10	S100 calcium binding protein A10(S100A10)
LOC109096753	18.6178	4.21861	0.000333772	0.0480596	NP_001354872	-	-
LOC109096784	3.20974	1.68246	0.00860779	0.0866794	XP_016876031	LATS2	large tumor suppressor kinase 2(LATS2)
LOC109096798	0.142512	-2.81085	0.000988767	0.0480596	NP_001104531	NHLH2	nescient helix-loop-helix 2(NHLH2)
LOC109096805	3.4329	1.77943	0.0055239	0.0716743	NP_001073852	GJC1	gap junction protein gamma 1(GJC1)
LOC109096948	3.40507	1.76768	0.00233309	0.0524362	NP_001008274	TAGLN3	transgelin 3(TAGLN3)
LOC109096977	4.51619	2.17511	0.00248685	0.0531336	NP_872333	CABP7	calcium binding protein 7(CABP7)
LOC109096990	0.120256	-3.05582	0.00116071	0.0483697	NP_001269642	FAM107A	family with sequence similarity 107 member A(FAM107A)
LOC109097007	0.292367	-1.77415	0.00535153	0.0706919	NP_001017961	FAM78B	family with sequence similarity 78 member B(FAM78B)
LOC109097009	0.0881477	-3.50393	0.000335133	0.0480596	NP_000718	CACNG1	calcium voltage-gated channel auxiliary subunit gamma 1(CACNG1)
LOC109097019	2.63815	1.39953	0.00806651	0.0840853	NP_001230106	ALDOA	aldolase, fructose-bisphosphate A(ALDOA)
LOC109097171	3.47318	1.79626	0.00587302	0.0730074	NP_003347	UCP3	uncoupling protein 3(UCP3)
LOC109097172	0.146072	-2.77525	0.00118239	0.0483929	NP_001350433	-	-
LOC109097182	3.80715	1.92871	0.00435756	0.0637448	NP_073714	UCP3	uncoupling protein 3(UCP3)
LOC109097188	3.44825	1.78587	0.00843907	0.0857096	NP_001317299	LRRTM4	leucine rich repeat transmembrane neuronal 4(LRRTM4)
LOC109097252	0.156762	-2.67335	0.000662836	0.0480596	XP_016874523	RPH3A	rabphilin 3A(RPH3A)
LOC109097298	4.03912	2.01404	0.00167252	0.0506657	NP_001013715	LDLRAD2	low density lipoprotein receptor class A domain containing 2(LDLRAD2)
LOC109097327	2.99605	1.58306	0.00999577	0.0931702	NP_001350016	-	-
LOC109097353	7.43703	2.89473	0.00049732	0.0480596	NP_002679	SEPT5	septin 5(SEPT5)
LOC109097383	0.404735	-1.30495	0.00989384	0.0928253	XP_011519263	iqsec3	IQ motif and Sec7 domain 3(IQSEC3)
LOC109097523	17.8605	4.1587	0.00018144	0.0480596	NP_064630	TULP4	tubby like protein 4(TULP4)
LOC109097540	3.33501	1.73769	0.003174	0.0586986	-	-	-
LOC109097552	3.40138	1.76612	0.0029788	0.0572534	XP_011510003	SSFA2	sperm specific antigen 2(SSFA2)
LOC109097642	0.258521	-1.95164	0.00390412	0.0614411	-	-	-
LOC109097667	4.51494	2.17471	0.00193639	0.0506657	NP_001137303	GRM5	glutamate metabotropic receptor 5(GRM5)
LOC109097694	2.61023	1.38418	0.00842851	0.0857096	XP_011517640	MPP7	membrane palmitoylated protein 7(MPP7)
LOC109097795	3.61792	1.85516	0.00195964	0.0506657	NP_003702	PLPP1	phospholipid phosphatase 1(PLPP1)
LOC109097817	0.067119	-3.89714	0.000407404	0.0480596	NP_001352844	-	-
LOC109097823	0.243275	-2.03934	0.00240071	0.0529533	NP_149123	ZIC5	Zic family member 5(ZIC5)
LOC109097826	0.277347	-1.85024	0.00343902	0.0596618	NP_009060	ZIC2	Zic family member 2(ZIC2)
LOC109097855	2.46367	1.30081	0.0096963	0.091948	XP_011516129	PHF24	PHD finger protein 24(PHF24)
LOC109097868	3.18299	1.67038	0.00367301	0.0607068	NP_001486	GFRA2	GDNF family receptor alpha 2(GFRA2)
LOC109097869	5.0478	2.33565	0.00217574	0.0517113	NP_006025	TP53I11	tumor protein p53 inducible protein 11(TP53I11)
LOC109097892	0.377581	-1.40514	0.00810341	0.0843257	NP_997269	SHISA6	shisa family member 6(SHISA6)
LOC109097926	0.252213	-1.98729	0.00202454	0.0506657	NP_001353138	-	-
LOC109097946	2.87275	1.52243	0.00452747	0.0651031	NP_057423	RAPGEFL1	Rap guanine nucleotide exchange factor like 1(RAPGEFL1)
LOC109097949	4.09861	2.03513	0.00188378	0.0506657	XP_016885182	NLGN4X	neuroligin 4, X-linked(NLGN4X)
LOC109097954	3.04401	1.60598	0.0066349	0.0764515	NP_001329	CXADR	coxsackie virus and adenovirus receptor(CXADR)
LOC109097957	12.3389	3.62514	0.000262513	0.0480596	NP_872359	CNIH2	cornichon family AMPA receptor auxiliary protein 2(CNIH2)
LOC109097959	26.0549	4.70348	0.00020235	0.0480596	-	-	-
LOC109097967	0.258527	-1.95161	0.00343283	0.0596618	NP_001353579	-	-
LOC109097982	13.019	3.70255	0.000209388	0.0480596	NP_872359	CNIH2	cornichon family AMPA receptor auxiliary protein 2(CNIH2)
LOC109098015	0.224561	-2.15482	0.0019884	0.0506657	NP_473366	B3GAT1	beta-1,3-glucuronyltransferase 1(B3GAT1)
LOC109098036	2.63323	1.39683	0.00808791	0.0842139	NP_000910	PAM	peptidylglycine alpha-amidating monooxygenase(PAM)
LOC109098040	4.04403	2.0158	0.00220172	0.0518077	NP_001139317	ROBO1	roundabout guidance receptor 1(ROBO1)
LOC109098063	0.234329	-2.09339	0.00142577	0.0493182	NP_001307545	GRIK1	glutamate ionotropic receptor kainate type subunit 1(GRIK1)
LOC109098202	0.169611	-2.5597	0.00237281	0.0529533	-	-	-
LOC109098298	9.17173	3.19719	0.00110786	0.0480596	NP_009294	COMT	catechol-O-methyltransferase(COMT)
LOC109098330	2.57136	1.36253	0.00728338	0.0798742	NP_056372	CHD5	chromodomain helicase DNA binding protein 5(CHD5)
LOC109098463	8.18791	3.0335	0.00205804	0.0510313	XP_006714628	EFNA5	ephrin A5(EFNA5)
LOC109098480	11.3238	3.50128	0.000339255	0.0480596	XP_011534248	TULP4	tubby like protein 4(TULP4)
LOC109098496	5.47218	2.45212	0.00119602	0.0483929	NP_001357457	-	-
LOC109098537	4.42488	2.14564	0.00323495	0.0592363	NP_000322	SAA1	serum amyloid A1(SAA1)
LOC109098540	3.48776	1.8023	0.00283709	0.0566381	NP_001278790	IGF2	insulin like growth factor 2(IGF2)
LOC109098543	0.304581	-1.7151	0.00683889	0.0775937	-	-	-
LOC109098562	0.0800494	-3.64296	0.000715295	0.0480596	NP_003296	TRPC3	transient receptor potential cation channel subfamily C member 3(TRPC3)
LOC109098570	3.78934	1.92195	0.00314938	0.0584176	-	-	-
LOC109098571	4.79776	2.26236	0.00141016	0.0493182	NP_001307076	CAMKV	CaM kinase like vesicle associated(CAMKV)
LOC109098591	7.70382	2.94557	0.000935874	0.0480596	NP_006282	TNFAIP2	TNF alpha induced protein 2(TNFAIP2)
LOC109098604	3.0497	1.60867	0.00434026	0.0636549	NP_002061	GNAI2	G protein subunit alpha i2(GNAI2)
LOC109098611	0.321246	-1.63825	0.00509044	0.0689584	XP_011531992	ITPR1	inositol 1,4,5-trisphosphate receptor type 1(ITPR1)
LOC109098652	0.285223	-1.80984	0.00682172	0.0775937	-	-	-
LOC109098663	2.95927	1.56524	0.00887178	0.0878338	NP_002480	NDUFA4	NDUFA4, mitochondrial complex associated(NDUFA4)
LOC109098669	9.76657	3.28785	0.000890209	0.0480596	NP_001123475	SYNPR	synaptoporin(SYNPR)
LOC109098706	0.0492894	-4.34258	0.00069393	0.0480596	NP_000261	PNP	purine nucleoside phosphorylase(PNP)
LOC109098736	5.60206	2.48596	0.0018786	0.0506657	XP_016862453	PTPRG	protein tyrosine phosphatase, receptor type G(PTPRG)
LOC109098754	7.13744	2.83541	0.000554119	0.0480596	NP_001373978	-	-
LOC109098757	3.1246	1.64367	0.00707476	0.0788318	XP_016871902	PRKG1	protein kinase, cGMP-dependent, type I(PRKG1)
LOC109098790	4.01077	2.00388	0.00180613	0.0506657	NP_001362400	-	-
LOC109098792	4.17187	2.06069	0.0016003	0.0506657	XP_016862453	PTPRG	protein tyrosine phosphatase, receptor type G(PTPRG)
LOC109098800	15.6613	3.96913	0.000360992	0.0480596	NP_001361244	-	-
LOC109098807	8.33853	3.05979	0.000540962	0.0480596	XP_006710552	ADGRL2	adhesion G protein-coupled receptor L2(ADGRL2)
LOC109098817	8.55376	3.09656	0.000384389	0.0480596	NP_001186623	SLC4A2	solute carrier family 4 member 2(SLC4A2)
LOC109098830	0.183572	-2.44558	0.00191936	0.0506657	NP_001353153	-	-
LOC109098923	0.31217	-1.6796	0.00461108	0.0656213	NP_443112	PIK3IP1	phosphoinositide-3-kinase interacting protein 1(PIK3IP1)
LOC109098927	0.323589	-1.62777	0.00411693	0.0627191	-	-	-
LOC109098943	3.62106	1.85641	0.00572525	0.072383	NP_659422	cdh24	cadherin 24(CDH24)
LOC109098970	5.52229	2.46527	0.00202013	0.0506657	NP_777568	CCDC50	coiled-coil domain containing 50(CCDC50)
LOC109099027	14.0225	3.80967	0.000473153	0.0480596	NP_003156	STXBP1	syntaxin binding protein 1(STXBP1)
LOC109099038	2.84983	1.51088	0.00467928	0.0661361	NP_071442	ADGRL4	adhesion G protein-coupled receptor L4(ADGRL4)
LOC109099098	2.89989	1.536	0.00452913	0.0651031	NP_005018	PIK3R2	phosphoinositide-3-kinase regulatory subunit 2(PIK3R2)
LOC109099116	4.6072	2.20389	0.00189722	0.0506657	NP_001300895	TFRC	transferrin receptor(TFRC)
LOC109099278	0.312718	-1.67706	0.00292228	0.0569954	NP_940916	NHLRC2	NHL repeat containing 2(NHLRC2)
LOC109099307	0.325434	-1.61957	0.00564543	0.0720151	NP_005036	RELN	reelin(RELN)
LOC109099311	0.234687	-2.09119	0.00134243	0.0493182	NP_899233	ASIC2	acid sensing ion channel subunit 2(ASIC2)
LOC109099322	0.108492	-3.20434	0.00748348	0.0811009	NP_001129162	PENK	proenkephalin(PENK)
LOC109099460	3.0077	1.58866	0.00448679	0.0647952	NP_004032	ARRB1	arrestin beta 1(ARRB1)
LOC109099532	5.06066	2.33932	0.000933062	0.0480596	NP_001076003	CA10	carbonic anhydrase 10(CA10)
LOC109099537	3.6874	1.8826	0.00322519	0.0591158	NP_001231063	MAP3K8	mitogen-activated protein kinase kinase kinase 8(MAP3K8)
LOC109099584	3.26011	1.70492	0.00771684	0.082098	XP_016882647	slc5a5	solute carrier family 5 member 5(SLC5A5)
LOC109099597	3.93303	1.97564	0.00145247	0.049352	NP_852664	PIK3R1	phosphoinositide-3-kinase regulatory subunit 1(PIK3R1)
LOC109099658	0.0982898	-3.34681	0.000542682	0.0480596	NP_000675	ADRB1	adrenoceptor beta 1(ADRB1)
LOC109099670	18.6287	4.21945	0.000296617	0.0480596	NP_001357255	-	-
LOC109099671	23.3365	4.54451	0.000227827	0.0480596	NP_002117	HLF	HLF, PAR bZIP transcription factor(HLF)
LOC109099687	3.64352	1.86533	0.00380048	0.0610756	NP_001244958	GSN	gelsolin(GSN)
LOC109099688	2.95348	1.56241	0.00515888	0.0696318	NP_079187	WLS	wntless Wnt ligand secretion mediator(WLS)
LOC109099842	2.92717	1.5495	0.00617528	0.0741804	NP_001019572	SBK1	SH3 domain binding kinase 1(SBK1)
LOC109099941	15.7883	3.98079	0.00028276	0.0480596	NP_001357255	-	-
LOC109099976	0.0582256	-4.1022	0.000283151	0.0480596	NP_000675	ADRB1	adrenoceptor beta 1(ADRB1)
LOC109100011	3.87153	1.9529	0.0060893	0.0739425	NP_002117	HLF	HLF, PAR bZIP transcription factor(HLF)
LOC109100040	0.128704	-2.95787	0.000444161	0.0480596	NP_001244288	SAMD14	sterile alpha motif domain containing 14(SAMD14)
LOC109100051	0.350929	-1.51075	0.00820297	0.0846062	NP_149062	SYNE1	spectrin repeat containing nuclear envelope protein 1(SYNE1)
LOC109100108	0.224516	-2.15511	0.00255037	0.0536203	NP_001923	MPP3	membrane palmitoylated protein 3(MPP3)
LOC109100230	4.2668	2.09315	0.00643808	0.0756373	NP_001372207	-	-
LOC109100284	0.082905	-3.5924	0.000768995	0.0480596	NP_004953	GDF10	growth differentiation factor 10(GDF10)
LOC109100417	3.20827	1.6818	0.00482174	0.067179	XP_011535569	ACTN1	actinin alpha 1(ACTN1)
LOC109100514	3.25027	1.70056	0.00341312	0.0596567	NP_001356473	-	-
LOC109100534	3.40577	1.76798	0.00332316	0.0596567	NP_071407	CDH23	cadherin related 23(CDH23)
LOC109100557	2.76964	1.4697	0.00633129	0.0751441	NP_001171608	cpeb3	cytoplasmic polyadenylation element binding protein 3(CPEB3)
LOC109100575	3.78412	1.91996	0.00495274	0.0681314	NP_001123633	STOX1	storkhead box 1(STOX1)
LOC109100627	3.10646	1.63527	0.00934907	0.0899394	NP_001308988	PDE1C	phosphodiesterase 1C(PDE1C)
LOC109100631	0.160103	-2.64292	0.00100828	0.0480596	NP_001240701	-	-
LOC109100726	0.19739	-2.34088	0.000855595	0.0480596	XP_016882044	CBARP	CACN beta subunit associated regulatory protein(CBARP)
LOC109100734	4.63084	2.21127	0.0028003	0.0565107	NP_060483	SOBP	sine oculis binding protein homolog(SOBP)
LOC109100822	0.271785	-1.87946	0.00481914	0.067179	NP_002440	MSX2	msh homeobox 2(MSX2)
LOC109100892	2.61462	1.3866	0.00895003	0.0879178	NP_001306035	OPCML	opioid binding protein/cell adhesion molecule like(OPCML)
LOC109100935	2.86324	1.51765	0.00887729	0.0878338	NP_001814	CKB	creatine kinase B(CKB)
LOC109100967	4.29265	2.10187	0.00547121	0.0714603	NP_005373	NEFM	neurofilament, medium polypeptide(NEFM)
LOC109101004	3.79553	1.9243	0.00574972	0.072598	-	-	-
LOC109101017	4.05782	2.02071	0.00342482	0.0596567	NP_001025041	SOWAHB	sosondowah ankyrin repeat domain family member B(SOWAHB)
LOC109101059	0.362872	-1.46247	0.00683497	0.0775937	NP_115590	SLA2	Src like adaptor 2(SLA2)
LOC109101151	6.23601	2.64062	0.00214791	0.051511	XP_016864309	LDB2	LIM domain binding 2(LDB2)
LOC109101188	0.374504	-1.41695	0.00610984	0.0739425	XP_016862476	ROBO2	roundabout guidance receptor 2(ROBO2)
LOC109101204	0.228647	-2.12881	0.00206682	0.0510384	NP_001265125	zbtb18	zinc finger and BTB domain containing 18(ZBTB18)
LOC109101224	0.330323	-1.59805	0.00775137	0.0822301	NP_001337962	-	-
LOC109101229	3.77533	1.9166	0.0054064	0.0710577	NP_065740	SLC24A3	solute carrier family 24 member 3(SLC24A3)
LOC109101251	0.052162	-4.26086	0.000839102	0.0480596	NP_006045	RTN3	reticulon 3(RTN3)
LOC109101315	2.77022	1.47	0.00615912	0.0740929	XP_016857737	CACNA1E	calcium voltage-gated channel subunit alpha1 E(CACNA1E)
LOC109101316	2.79562	1.48317	0.00641703	0.0755623	XP_011536093	CIT	citron rho-interacting serine/threonine kinase(CIT)
LOC109101318	0.267303	-1.90345	0.00301433	0.0574839	NP_001035025	CHN2	chimerin 2(CHN2)
LOC109101325	4.14725	2.05216	0.00294342	0.0570454	NP_001305808	STK32C	serine/threonine kinase 32C(STK32C)
LOC109101359	9.35586	3.22587	0.000541039	0.0480596	XP_006716504	SULF1	sulfatase 1(SULF1)
LOC109101407	0.116585	-3.10055	0.00200739	0.0506657	NP_849195	NPAS4	neuronal PAS domain protein 4(NPAS4)
LOC109101435	0.186137	-2.42556	0.000681134	0.0480596	NP_000015	ADRB2	adrenoceptor beta 2(ADRB2)
LOC109101556	6.80012	2.76556	0.000630075	0.0480596	NP_001093203	ADCYAP1	adenylate cyclase activating polypeptide 1(ADCYAP1)
LOC109101638	2.77787	1.47398	0.00744241	0.0808916	NP_057427	CENPF	centromere protein F(CENPF)
LOC109101715	5.60891	2.48772	0.000694349	0.0480596	NP_000819	GRIA3	glutamate ionotropic receptor AMPA type subunit 3(GRIA3)
LOC109101787	9.83788	3.29835	0.00242602	0.0529533	NP_001445	FOXJ1	forkhead box J1(FOXJ1)
LOC109101862	3.54752	1.82681	0.00661513	0.076307	NP_004775	NDST3	N-deacetylase and N-sulfotransferase 3(NDST3)
LOC109101937	2.7511	1.46001	0.00684349	0.0775937	NP_001316840	GPI	glucose-6-phosphate isomerase(GPI)
LOC109101980	0.396498	-1.33461	0.00900008	0.0881005	NP_001350590	-	-
LOC109101999	3.1091	1.6365	0.0061268	0.0739433	NP_001371614	-	-
LOC109102003	3.09911	1.63186	0.00459558	0.0654523	XP_016867148	AKAP9	A-kinase anchoring protein 9(AKAP9)
LOC109102009	4.26967	2.09413	0.00155245	0.0505031	NP_015564	GRIA3	glutamate ionotropic receptor AMPA type subunit 3(GRIA3)
LOC109102015	4.36054	2.12451	0.00132673	0.0493182	NP_015564	GRIA3	glutamate ionotropic receptor AMPA type subunit 3(GRIA3)
LOC109102080	3.68904	1.88324	0.00244929	0.0529712	NP_003460	SCG2	secretogranin II(SCG2)
LOC109102093	0.244991	-2.0292	0.0041476	0.0627773	NP_000997	RPS3A	ribosomal protein S3A(RPS3A)
LOC109102103	26.4715	4.72637	0.00018636	0.0480596	NP_443131	GPRIN1	G protein regulated inducer of neurite outgrowth 1(GPRIN1)
LOC109102138	0.267604	-1.90183	0.00423114	0.0634143	NP_001158091	GPC3	glypican 3(GPC3)
LOC109102168	10.7828	3.43066	0.000238943	0.0480596	XP_005266130	GRIN1	glutamate ionotropic receptor NMDA type subunit 1(GRIN1)
LOC109102244	2.59411	1.37524	0.00936364	0.0899394	NP_001135919	ATP1B4	ATPase Na+/K+ transporting family member beta 4(ATP1B4)
LOC109102282	3.23106	1.69201	0.00359312	0.0602487	NP_001280	CLIC2	chloride intracellular channel 2(CLIC2)
LOC109102360	4.64911	2.21695	0.00129402	0.0493182	NP_001295282	RAMP1	receptor activity modifying protein 1(RAMP1)
LOC109102441	6.6364	2.7304	0.000467235	0.0480596	NP_056284	NIPSNAP3A	nipsnap homolog 3A(NIPSNAP3A)
LOC109102482	5.72648	2.51765	0.000694943	0.0480596	NP_001291363	LDB2	LIM domain binding 2(LDB2)
LOC109102510	2.73917	1.45374	0.00599734	0.0735347	NP_001073864	AATK	apoptosis associated tyrosine kinase(AATK)
LOC109102512	0.34647	-1.5292	0.00828131	0.0847436	NP_689982	CBARP	CACN beta subunit associated regulatory protein(CBARP)
LOC109102513	2.92639	1.54912	0.00550744	0.0716743	NP_001165094	VEGFA	vascular endothelial growth factor A(VEGFA)
LOC109102536	0.406131	-1.29998	0.0094611	0.0904357	NP_060422	PTCD3	pentatricopeptide repeat domain 3(PTCD3)
LOC109102560	0.248579	-2.00822	0.00185799	0.0506657	-	-	-
LOC109102584	0.36197	-1.46606	0.00867385	0.0870477	-	-	-
LOC109102585	0.132275	-2.91839	0.000724249	0.0480596	-	-	-
LOC109102605	2.85705	1.51453	0.00687942	0.0778643	NP_001186623	SLC4A2	solute carrier family 4 member 2(SLC4A2)
LOC109102607	3.67706	1.87855	0.00213108	0.0513977	NP_542388	RSAD2	radical S-adenosyl methionine domain containing 2(RSAD2)
LOC109102612	0.361701	-1.46713	0.00744847	0.0809101	NP_001336113	-	-
LOC109102647	5.29985	2.40595	0.000993287	0.0480596	NP_001156751	TENM1	teneurin transmembrane protein 1(TENM1)
LOC109102655	6.25365	2.6447	0.00114256	0.0480596	NP_006632	CCR9	C-C motif chemokine receptor 9(CCR9)
LOC109102752	5.13959	2.36165	0.00083331	0.0480596	NP_001373377	-	-
LOC109102783	8.70523	3.12188	0.00118507	0.0483929	XP_016856501	ak5	adenylate kinase 5(AK5)
LOC109102850	7.14405	2.83674	0.00112973	0.0480596	NP_001121900	FSTL5	follistatin like 5(FSTL5)
LOC109102854	4.71988	2.23875	0.00103152	0.0480596	NP_004161	SLC1A1	solute carrier family 1 member 1(SLC1A1)
LOC109102887	4.25807	2.0902	0.0018702	0.0506657	NP_150284	CAMK2N2	calcium/calmodulin dependent protein kinase II inhibitor 2(CAMK2N2)
LOC109102918	0.20725	-2.27056	0.00111886	0.0480596	NP_002223	KCNA3	potassium voltage-gated channel subfamily A member 3(KCNA3)
LOC109102935	0.280999	-1.83136	0.00269894	0.0552976	NP_001155037	TNIK	TRAF2 and NCK interacting kinase(TNIK)
LOC109102982	4.87511	2.28544	0.00407823	0.062488	-	-	-
LOC109103077	2.68012	1.4223	0.00638761	0.0754257	NP_001305847	GLIS2	GLIS family zinc finger 2(GLIS2)
LOC109103078	5.06475	2.34049	0.00238758	0.0529533	XP_016868497	CSMD3	CUB and Sushi multiple domains 3(CSMD3)
LOC109103085	0.354456	-1.49632	0.00661598	0.076307	NP_001305742	TTC9C	tetratricopeptide repeat domain 9C(TTC9C)
LOC109103114	7.71384	2.94745	0.000767393	0.0480596	XP_005259622	PALM	paralemmin(PALM)
LOC109103133	0.227179	-2.1381	0.00132627	0.0493182	XP_016868166	CALN1	calneuron 1(CALN1)
LOC109103149	2.7464	1.45754	0.00827992	0.0847436	NP_036200	ATF5	activating transcription factor 5(ATF5)
LOC109103155	3.1887	1.67297	0.00505815	0.0687006	NP_036200	ATF5	activating transcription factor 5(ATF5)
LOC109103180	5.83645	2.54509	0.000609128	0.0480596	NP_001093868	RAP1GAP2	RAP1 GTPase activating protein 2(RAP1GAP2)
LOC109103182	0.241581	-2.04942	0.00229614	0.0524021	NP_001365122	-	-
LOC109103305	2.8389	1.50533	0.00952377	0.0908203	NP_848663	RTN4RL1	reticulon 4 receptor like 1(RTN4RL1)
LOC109103415	0.303414	-1.72064	0.00552722	0.0716743	NP_055878	SLC8A2	solute carrier family 8 member A2(SLC8A2)
LOC109103453	8.07657	3.01374	0.00138033	0.0493182	NP_006189	PCP4	Purkinje cell protein 4(PCP4)
LOC109103463	4.42702	2.14634	0.00129488	0.0493182	NP_001350461	-	-
LOC109103583	5.24905	2.39206	0.00225761	0.0523301	NP_001186623	SLC4A2	solute carrier family 4 member 2(SLC4A2)
LOC109103593	3.19311	1.67496	0.00923799	0.0893554	NP_036582	SLC13A4	solute carrier family 13 member 4(SLC13A4)
LOC109103734	2.73991	1.45413	0.00751898	0.0812015	XP_005271779	USP2	ubiquitin specific peptidase 2(USP2)
LOC109103749	0.0174052	-5.84433	0.000959658	0.0480596	NP_005156	ALDOC	aldolase, fructose-bisphosphate C(ALDOC)
LOC109103780	3.08973	1.62748	0.00946077	0.0904357	NP_851397	HIF1A	hypoxia inducible factor 1 alpha subunit(HIF1A)
LOC109103785	4.1662	2.05873	0.00136393	0.0493182	NP_001353732	-	-
LOC109103803	0.204109	-2.29259	0.00137689	0.0493182	NP_001161431	TMEM178A	transmembrane protein 178A(TMEM178A)
LOC109103849	3.37641	1.75549	0.00389019	0.0613258	NP_112177	LBH	limb bud and heart development(LBH)
LOC109103861	0.398631	-1.32687	0.00994559	0.0930759	NP_001123318	CACNA1C	calcium voltage-gated channel subunit alpha1 C(CACNA1C)
LOC109103864	0.387026	-1.3695	0.00776529	0.0823307	-	-	-
LOC109103941	0.335647	-1.57498	0.0045268	0.0651031	XP_011543579	GDPD5	glycerophosphodiester phosphodiesterase domain containing 5(GDPD5)
LOC109103971	0.10745	-3.21827	0.0076611	0.0818868	NP_001245391	PAX6	paired box 6(PAX6)
LOC109103978	0.201674	-2.3099	0.00712864	0.0789109	NP_001245391	PAX6	paired box 6(PAX6)
LOC109104073	0.343677	-1.54088	0.00612275	0.0739425	NP_005139	UNC119	unc-119 lipid binding chaperone(UNC119)
LOC109104112	7.14673	2.83728	0.00106563	0.0480596	NP_065915	NYAP2	neuronal tyrosine-phosphorylated phosphoinositide-3-kinase adaptor 2(NYAP2)
LOC109104203	8.17119	3.03055	0.000933467	0.0480596	XP_005249641	ADCY1	adenylate cyclase 1(ADCY1)
LOC109104210	0.336323	-1.57208	0.00388318	0.0613258	XP_011522404	SGSM2	small G protein signaling modulator 2(SGSM2)
LOC109104244	7.83582	2.97008	0.000861947	0.0480596	NP_001099049	SYNDIG1L	synapse differentiation inducing 1 like(SYNDIG1L)
LOC109104259	2.96391	1.5675	0.00537332	0.0709294	XP_016873014	TENM4	teneurin transmembrane protein 4(TENM4)
LOC109104324	0.0903934	-3.46764	0.00131584	0.0493182	NP_001355832	-	-
LOC109104369	0.220516	-2.18105	0.00277548	0.0561317	NP_001295137	ARHGAP39	Rho GTPase activating protein 39(ARHGAP39)
LOC109104454	0.256356	-1.96378	0.00790693	0.0831942	NP_001291465	EPHA4	EPH receptor A4(EPHA4)
LOC109104580	0.284695	-1.81251	0.00342095	0.0596567	NP_006325	OLFM1	olfactomedin 1(OLFM1)
LOC109104610	6.54415	2.7102	0.00138633	0.0493182	NP_848595	phospho1	phosphoethanolamine/phosphocholine phosphatase(PHOSPHO1)
LOC109104617	10.1883	3.34884	0.000808661	0.0480596	NP_001167609	CCK	cholecystokinin(CCK)
LOC109104631	3.67241	1.87673	0.00294083	0.0570454	NP_002989	SDC2	syndecan 2(SDC2)
LOC109104637	3.1728	1.66576	0.00388755	0.0613258	-	-	-
LOC109104641	0.271325	-1.88191	0.00461991	0.0656967	NP_001139734	SYT14	synaptotagmin 14(SYT14)
LOC109104654	3.50244	1.80836	0.00504456	0.0686873	NP_005323	HBZ	hemoglobin subunit zeta(HBZ)
LOC109104675	6.89288	2.78511	0.000599816	0.0480596	NP_001159968	SLC16A1	solute carrier family 16 member 1(SLC16A1)
LOC109104737	2.94732	1.5594	0.00817823	0.0844448	XP_011518916	CLEC4E	C-type lectin domain family 4 member E(CLEC4E)
LOC109104768	2.49337	1.3181	0.00891816	0.0879178	NP_001137854	PLCL2	phospholipase C like 2(PLCL2)
LOC109104784	6.65503	2.73444	0.0011935	0.0483929	NP_001375266	-	-
LOC109104786	3.12084	1.64193	0.00380043	0.0610756	NP_061130	ZNF395	zinc finger protein 395(ZNF395)
LOC109104800	3.03015	1.59939	0.00816151	0.0843962	NP_002217	JAG2	jagged 2(JAG2)
LOC109104824	3.31107	1.7273	0.0033096	0.0596567	NP_056531	MINK1	misshapen like kinase 1(MINK1)
LOC109104826	2.78476	1.47755	0.00588017	0.0730074	NP_733763	MINK1	misshapen like kinase 1(MINK1)
LOC109104961	2.57258	1.36322	0.0093546	0.0899394	NP_001093635	PHACTR2	phosphatase and actin regulator 2(PHACTR2)
LOC109104964	0.203271	-2.29853	0.00109107	0.0480596	NP_001272456	OPRM1	opioid receptor mu 1(OPRM1)
LOC109104972	2.70533	1.4358	0.00804207	0.0839328	XP_024307070	-	-
LOC109105012	2.94381	1.55769	0.0071328	0.0789109	NP_001308032	SLC4A7	solute carrier family 4 member 7(SLC4A7)
LOC109105179	2.67199	1.41792	0.00679972	0.077486	XP_011523388	RNF213	ring finger protein 213(RNF213)
LOC109105189	0.24348	-2.03812	0.00201573	0.0506657	XP_005264201	TMEM178A	transmembrane protein 178A(TMEM178A)
LOC109105295	3.41299	1.77104	0.00724798	0.0798524	NP_001345280	-	-
LOC109105305	5.16701	2.36933	0.000938778	0.0480596	NP_000827	GRIN2D	glutamate ionotropic receptor NMDA type subunit 2D(GRIN2D)
LOC109105329	0.254973	-1.97158	0.0019682	0.0506657	NP_001339742	-	-
LOC109105387	0.191136	-2.38733	0.00145034	0.049352	NP_001265482	GRIN2C	glutamate ionotropic receptor NMDA type subunit 2C(GRIN2C)
LOC109105414	0.315041	-1.66639	0.00828468	0.0847436	NP_001273295	MAP7D1	MAP7 domain containing 1(MAP7D1)
LOC109105422	2.86282	1.51744	0.00798632	0.0835925	NP_647475	ANGPTL4	angiopoietin like 4(ANGPTL4)
LOC109105428	0.247545	-2.01424	0.00273098	0.0556174	NP_058649	PDE11A	phosphodiesterase 11A(PDE11A)
LOC109105459	9.53208	3.25279	0.000505748	0.0480596	XP_016861699	epha6	EPH receptor A6(EPHA6)
LOC109105479	0.303228	-1.72153	0.00366436	0.0607068	NP_057737	ZAK	sterile alpha motif and leucine zipper containing kinase AZK(ZAK)
LOC109105484	5.2491	2.39207	0.00269321	0.0552494	NP_937756	CSMD3	CUB and Sushi multiple domains 3(CSMD3)
LOC109105501	6.515	2.70376	0.00125151	0.0488331	NP_078973	ZNF385D	zinc finger protein 385D(ZNF385D)
LOC109105502	2.53196	1.34025	0.00972417	0.0921169	XP_024308551	-	-
LOC109105523	0.300027	-1.73684	0.00591878	0.0731426	NP_001131032	TMEM151B	transmembrane protein 151B(TMEM151B)
LOC109105577	4.65979	2.22027	0.00131981	0.0493182	NP_001307489	CSRNP1	cysteine and serine rich nuclear protein 1(CSRNP1)
LOC109105585	0.356865	-1.48655	0.00813041	0.0843257	-	-	-
LOC109105745	5.52052	2.4648	0.00105976	0.0480596	XP_011509547	NPPC	natriuretic peptide C(NPPC)
LOC109105814	2.53326	1.341	0.00987757	0.0927195	NP_001368872	-	-
LOC109105865	3.11222	1.63794	0.00341017	0.0596567	NP_001189452	ddr1	discoidin domain receptor tyrosine kinase 1(DDR1)
LOC109105870	4.32792	2.11367	0.00135859	0.0493182	NP_055851	ENDOD1	endonuclease domain containing 1(ENDOD1)
LOC109105887	4.487	2.16575	0.00328152	0.0596567	NP_001019384	S100A13	S100 calcium binding protein A13(S100A13)
LOC109105896	16.4871	4.04327	0.000467489	0.0480596	NP_110380	WNT3	Wnt family member 3(WNT3)
LOC109105949	0.0431555	-4.53431	0.00103014	0.0480596	NP_002760	prss1	protease, serine 1(PRSS1)
LOC109105974	2.91063	1.54133	0.00414585	0.0627773	XP_016869185	ADGRB1	adhesion G protein-coupled receptor B1(ADGRB1)
LOC109105991	4.22258	2.07812	0.00197667	0.0506657	NP_068779	MCL1	BCL2 family apoptosis regulator(MCL1)
LOC109106047	0.367891	-1.44265	0.00758429	0.0816565	NP_001099026	THEMIS2	thymocyte selection associated family member 2(THEMIS2)
LOC109106057	3.01556	1.59242	0.00495654	0.0681314	NP_003770	B4GALT3	beta-1,4-galactosyltransferase 3(B4GALT3)
LOC109106093	4.67498	2.22496	0.00279992	0.0565107	NP_005593	CLDN11	claudin 11(CLDN11)
LOC109106101	0.380169	-1.39529	0.00599241	0.0735347	NP_001257295	PLPPR3	phospholipid phosphatase related 3(PLPPR3)
LOC109106137	0.270523	-1.88618	0.00290379	0.0569411	NP_000902	OPRD1	opioid receptor delta 1(OPRD1)
LOC109106143	3.76191	1.91146	0.00488842	0.0675714	NP_003453	DNALI1	dynein axonemal light intermediate chain 1(DNALI1)
LOC109106154	3.41829	1.77327	0.00846441	0.0858731	NP_004459	FHL3	four and a half LIM domains 3(FHL3)
LOC109106212	0.335682	-1.57483	0.00609051	0.0739425	XP_024305521	-	-
LOC109106214	0.245088	-2.02863	0.00317735	0.058702	NP_006707	DBF4	DBF4 zinc finger(DBF4)
LOC109106328	8.5011	3.08765	0.00077315	0.0480596	NP_002230	KCNJ3	potassium voltage-gated channel subfamily J member 3(KCNJ3)
LOC109106333	0.28837	-1.794	0.00293076	0.0570454	NP_056019	THSD7A	thrombospondin type 1 domain containing 7A(THSD7A)
LOC109106352	7.67005	2.93924	0.000882531	0.0480596	NP_001138590	GRID2IP	Grid2 interacting protein(GRID2IP)
LOC109106368	3.25109	1.70092	0.00409513	0.0626437	XP_006716653	PLEC	plectin(PLEC)
LOC109106407	0.283127	-1.82048	0.00369714	0.0607845	NP_001280001	CHN2	chimerin 2(CHN2)
LOC109106456	2.53649	1.34283	0.00923189	0.0893554	NP_001275902	ADAM12	ADAM metallopeptidase domain 12(ADAM12)
LOC109106498	0.333336	-1.58495	0.00789287	0.0831942	NP_001191379	CCPG1	cell cycle progression 1(CCPG1)
LOC109106509	3.25317	1.70185	0.00563299	0.0720151	XP_005262892	FAT1	FAT atypical cadherin 1(FAT1)
LOC109106527	5.15134	2.36495	0.000886073	0.0480596	NP_001287973	CADM1	cell adhesion molecule 1(CADM1)
LOC109106625	0.385939	-1.37356	0.00778094	0.0824026	XP_016877795	CTDSPL2	CTD small phosphatase like 2(CTDSPL2)
LOC109106847	0.31709	-1.65703	0.00621282	0.0745458	NP_001337979	-	-
LOC109106881	4.5643	2.19039	0.00340654	0.0596567	NP_006069	CACNG2	calcium voltage-gated channel auxiliary subunit gamma 2(CACNG2)
LOC109106883	2.96891	1.56993	0.00407244	0.062488	XP_016876605	PPP1R13B	protein phosphatase 1 regulatory subunit 13B(PPP1R13B)
LOC109106889	2.63545	1.39805	0.00700092	0.0784323	NP_055399	ERO1A	endoplasmic reticulum oxidoreductase 1 alpha(ERO1A)
LOC109106900	0.298189	-1.7457	0.00923081	0.0893554	NP_000320	RPE65	RPE65, retinoid isomerohydrolase(RPE65)
LOC109106911	0.252258	-1.98703	0.00183588	0.0506657	XP_016877293	NRXN3	neurexin 3(NRXN3)
LOC109106916	0.379694	-1.39709	0.0071511	0.0790662	NP_001242937	PNPLA8	patatin like phospholipase domain containing 8(PNPLA8)
LOC109107003	2.58029	1.36753	0.00798775	0.0835925	NP_963833	NDRG2	NDRG family member 2(NDRG2)
LOC109107018	0.34755	-1.52471	0.00583936	0.0728881	NP_001020423	TPD52	tumor protein D52(TPD52)
LOC109107035	4.74076	2.24512	0.00375281	0.0609413	NP_001288574	LRAT	lecithin retinol acyltransferase (phosphatidylcholine--retinol O-acyltransferase)(LRAT)
LOC109107057	0.271068	-1.88327	0.00998737	0.0931702	XP_016885672	KIF26B	kinesin family member 26B(KIF26B)
LOC109107103	0.158884	-2.65395	0.000647843	0.0480596	NP_004758	GPR37L1	G protein-coupled receptor 37 like 1(GPR37L1)
LOC109107142	10.288	3.36289	0.00143002	0.0493182	NP_004566	POU4F2	POU class 4 homeobox 2(POU4F2)
LOC109107150	0.30764	-1.70069	0.00342122	0.0596567	NP_113668	RIOK1	RIO kinase 1(RIOK1)
LOC109107152	0.125567	-2.99347	0.000919954	0.0480596	NP_998734	NEBL	nebulette(NEBL)
LOC109107155	0.241626	-2.04915	0.00218606	0.0518058	NP_001364254	-	-
LOC109107188	0.0733275	-3.7695	0.00045158	0.0480596	NP_065865	MARCH4	membrane associated ring-CH-type finger 4(MARCH4)
LOC109107195	0.290967	-1.78107	0.00336427	0.0596567	XP_011542755	TRIM35	tripartite motif containing 35(TRIM35)
LOC109107272	0.324104	-1.62547	0.00517742	0.0696847	NP_002513	NPTX1	neuronal pentraxin 1(NPTX1)
LOC109107301	3.8804	1.95621	0.00243155	0.0529533	NP_001375332	-	-
LOC109107332	4.50029	2.17002	0.00191431	0.0506657	NP_000205	JAG1	jagged 1(JAG1)
LOC109107408	0.0853084	-3.55117	0.000960627	0.0480596	NP_001335123	-	-
LOC109107443	15.1301	3.91935	0.000206941	0.0480596	NP_064630	TULP4	tubby like protein 4(TULP4)
LOC109107471	16.866	4.07604	0.000190143	0.0480596	NP_849188	RP1L1	retinitis pigmentosa 1 like 1(RP1L1)
LOC109107541	4.96404	2.31151	0.00339646	0.0596567	NP_065978	VAT1L	vesicle amine transport 1 like(VAT1L)
LOC109107687	3.91052	1.96736	0.00220163	0.0518077	XP_016859109	MYT1L	myelin transcription factor 1 like(MYT1L)
LOC109107701	0.395767	-1.33728	0.00884613	0.0877331	NP_060295	ADPRHL2	ADP-ribosylhydrolase like 2(ADPRHL2)
LOC109107705	0.217936	-2.19802	0.00198661	0.0506657	XP_011534978	POMT2	protein O-mannosyltransferase 2(POMT2)
LOC109107784	19.794	4.30699	0.00166669	0.0506657	NP_004566	POU4F2	POU class 4 homeobox 2(POU4F2)
LOC109107841	14.7073	3.87846	0.0013635	0.0493182	NP_005412	TAL2	TAL bHLH transcription factor 2(TAL2)
LOC109107852	0.290138	-1.78519	0.00708514	0.0788529	XP_011507384	CENPF	centromere protein F(CENPF)
LOC109107960	2.92539	1.54863	0.00629755	0.0750509	NP_001356799	-	-
LOC109107962	5.86253	2.55152	0.00139416	0.0493182	NP_001333739	-	-
LOC109107998	17.7578	4.15038	0.000233754	0.0480596	NP_671492	PALM2-AKAP2	PALM2-AKAP2 readthrough(PALM2-AKAP2)
LOC109108019	4.08902	2.03175	0.0041293	0.0627773	XP_016877285	NRXN3	neurexin 3(NRXN3)
LOC109108028	2.85558	1.51379	0.00895433	0.0879178	NP_004888	MINPP1	multiple inositol-polyphosphate phosphatase 1(MINPP1)
LOC109108044	7.06093	2.81986	0.00144351	0.0493182	NP_689660	LRFN5	leucine rich repeat and fibronectin type III domain containing 5(LRFN5)
LOC109108078	7.49817	2.90654	0.00134504	0.0493182	NP_001269167	BCL11B	B-cell CLL/lymphoma 11B(BCL11B)
LOC109108082	0.389804	-1.35918	0.00924053	0.0893554	-	-	-
LOC109108120	3.01056	1.59003	0.00432147	0.0636549	NP_892113	SHC1	SHC adaptor protein 1(SHC1)
LOC109108126	12.0125	3.58647	0.000613646	0.0480596	NP_002514	NPTX2	neuronal pentraxin 2(NPTX2)
LOC109108186	5.42173	2.43875	0.00207452	0.0510384	NP_001186699	OTX1	orthodenticle homeobox 1(OTX1)
LOC109108195	0.32959	-1.60125	0.00483449	0.0672705	NP_064582	SMYD2	SET and MYND domain containing 2(SMYD2)
LOC109108216	2.43856	1.28603	0.00889251	0.0878338	-	-	-
LOC109108227	4.71648	2.23771	0.00683197	0.0775937	NP_067080	ngb	neuroglobin(NGB)
LOC109108241	7.95368	2.99162	0.00138839	0.0493182	XP_011535672	NRXN3	neurexin 3(NRXN3)
LOC109108243	0.227625	-2.13527	0.00168732	0.0506657	XP_011514358	GPR22	G protein-coupled receptor 22(GPR22)
LOC109108256	2.65989	1.41137	0.00749052	0.0811063	NP_001356464	-	-
LOC109108289	3.15179	1.65617	0.00660937	0.076307	XP_011534927	PLEKHG3	pleckstrin homology and RhoGEF domain containing G3(PLEKHG3)
LOC109108320	3.74058	1.90326	0.0026234	0.054418	NP_001332934	IGFLR1	IGF like family receptor 1(IGFLR1)
LOC109108375	4.776	2.2558	0.00246745	0.0530224	NP_002667	PMM1	phosphomannomutase 1(PMM1)
LOC109108425	0.293355	-1.76928	0.00268791	0.0552315	NP_699197	SVEP1	sushi, von Willebrand factor type A, EGF and pentraxin domain containing 1(SVEP1)
LOC109108429	0.163423	-2.61332	0.000716837	0.0480596	NP_079497	KCNIP4	potassium voltage-gated channel interacting protein 4(KCNIP4)
LOC109108476	5.95896	2.57506	0.0018209	0.0506657	NP_037359	ACAN	aggrecan(ACAN)
LOC109108492	3.05809	1.61263	0.00667592	0.0766029	NP_068758	FKBP10	FK506 binding protein 10(FKBP10)
LOC109108652	4.07632	2.02727	0.00175364	0.0506657	NP_079147	MAP6D1	MAP6 domain containing 1(MAP6D1)
LOC109108712	0.39863	-1.32688	0.00839658	0.0855117	NP_001099043	FBXO45	F-box protein 45(FBXO45)
LOC109108722	0.324158	-1.62523	0.00667675	0.0766029	NP_001264996	GRM1	glutamate metabotropic receptor 1(GRM1)
LOC109108798	3.64936	1.86764	0.00456049	0.065201	NP_001309234	CNIH3	cornichon family AMPA receptor auxiliary protein 3(CNIH3)
LOC109108854	4.77415	2.25524	0.00273699	0.0556174	NP_064595	SEMA4B	semaphorin 4B(SEMA4B)
LOC109108878	2.61453	1.38655	0.0088878	0.0878338	NP_002636	PIK3C2A	phosphatidylinositol-4-phosphate 3-kinase catalytic subunit type 2 alpha(PIK3C2A)
LOC109108919	4.0787	2.02811	0.00125328	0.0488331	NP_001167565	ZEB1	zinc finger E-box binding homeobox 1(ZEB1)
LOC109108928	13.8309	3.78982	0.000205237	0.0480596	NP_005016	SERPINI1	serpin family I member 1(SERPINI1)
LOC109108935	5.89687	2.55995	0.00064789	0.0480596	NP_005016	SERPINI1	serpin family I member 1(SERPINI1)
LOC109108959	3.74496	1.90495	0.00201973	0.0506657	NP_001197	KLF9	Kruppel like factor 9(KLF9)
LOC109108993	3.42998	1.7782	0.00287365	0.0569399	NP_001207419	CDH13	cadherin 13(CDH13)
LOC109109003	0.21276	-2.2327	0.00130356	0.0493182	-	-	-
LOC109109053	0.235198	-2.08805	0.00188371	0.0506657	NP_065907	TSHZ3	teashirt zinc finger homeobox 3(TSHZ3)
LOC109109055	0.233734	-2.09706	0.00295552	0.0571507	NP_065907	TSHZ3	teashirt zinc finger homeobox 3(TSHZ3)
LOC109109069	0.000717374	-10.445	2.5e-05	0.0480596	XP_011538315	ARHGAP22	Rho GTPase activating protein 22(ARHGAP22)
LOC109109074	6.58194	2.71851	0.00107718	0.0480596	NP_079513	sost	sclerostin(SOST)
LOC109109081	4.14844	2.05257	0.00249237	0.053184	XP_011518206	SYT9	synaptotagmin 9(SYT9)
LOC109109111	3.32378	1.73282	0.00747022	0.0810044	XP_005257846	SLC16A6	solute carrier family 16 member 6(SLC16A6)
LOC109109153	3.13643	1.64912	0.00459106	0.0654523	XP_011518203	SYT9	synaptotagmin 9(SYT9)
LOC109109159	4.28372	2.09886	0.00623475	0.0746668	NP_001357427	-	-
LOC109109230	9.5024	3.24829	0.000435072	0.0480596	NP_002846	NECTIN1	nectin cell adhesion molecule 1(NECTIN1)
LOC109109273	0.31351	-1.67342	0.00388522	0.0613258	NP_057735	DACT1	dishevelled binding antagonist of beta catenin 1(DACT1)
LOC109109300	2.53945	1.34452	0.00906561	0.0885875	NP_001094288	PID1	phosphotyrosine interaction domain containing 1(PID1)
LOC109109321	3.98939	1.99617	0.00172256	0.0506657	NP_001316677	NECAB2	N-terminal EF-hand calcium binding protein 2(NECAB2)
LOC109109371	3.15337	1.6569	0.00652053	0.0762684	NP_982272	DOCK8	dedicator of cytokinesis 8(DOCK8)
LOC109109398	16.9432	4.08264	0.000370011	0.0480596	NP_705900	CPNE7	copine 7(CPNE7)
LOC109109414	2.97758	1.57414	0.00546592	0.0714414	NP_001139138	GLG1	golgi glycoprotein 1(GLG1)
LOC109109500	0.0600834	-4.05689	0.000843871	0.0480596	NP_758952	CACNA2D4	calcium voltage-gated channel auxiliary subunit alpha2delta 4(CACNA2D4)
LOC109109529	6.8071	2.76704	0.00112243	0.0480596	NP_002042	GATA3	GATA binding protein 3(GATA3)
LOC109109535	0.27728	-1.85058	0.00812669	0.0843257	NP_065907	TSHZ3	teashirt zinc finger homeobox 3(TSHZ3)
LOC109109613	3.34947	1.74393	0.00305824	0.0575036	NP_071746	NECAB1	N-terminal EF-hand calcium binding protein 1(NECAB1)
LOC109109652	0.330127	-1.59891	0.00571305	0.0723315	NP_689801	TMTC2	transmembrane and tetratricopeptide repeat containing 2(TMTC2)
LOC109109654	3.9565	1.98422	0.00271246	0.0553997	NP_932766	AQP1	aquaporin 1 (Colton blood group)(AQP1)
LOC109109693	10.2654	3.35972	0.000539991	0.0480596	NP_001338211	-	-
LOC109109842	0.132814	-2.91252	0.00229069	0.0524021	NP_006110	FGF8	fibroblast growth factor 8(FGF8)
LOC109109843	7.32678	2.87318	0.000949582	0.0480596	NP_001025176	CPLX3	complexin 3(CPLX3)
LOC109109850	6.3426	2.66507	0.00107887	0.0480596	NP_602299	RGS3	regulator of G-protein signaling 3(RGS3)
LOC109109930	0.338884	-1.56114	0.00541252	0.0710577	XP_006711278	PLEKHA6	pleckstrin homology domain containing A6(PLEKHA6)
LOC109109944	4.19051	2.06713	0.00179222	0.0506657	NP_689940	CPNE2	copine 2(CPNE2)
LOC109109959	0.330063	-1.59919	0.00489808	0.0675841	XP_011543433	ANO1	anoctamin 1(ANO1)
LOC109109994	2.71678	1.4419	0.00727634	0.0798742	NP_067675	TRIB2	tribbles pseudokinase 2(TRIB2)
LOC109110010	3.86688	1.95117	0.00191368	0.0506657	NP_067675	TRIB2	tribbles pseudokinase 2(TRIB2)
LOC109110016	3.08257	1.62413	0.00365558	0.0606631	NP_055870	SWAP70	SWAP switching B-cell complex 70kDa subunit(SWAP70)
LOC109110044	4.06588	2.02357	0.00427065	0.0634994	NP_065831	DISP3	dispatched RND transporter family member 3(DISP3)
LOC109110062	6.53361	2.70788	0.00106192	0.0480596	NP_066285	NR2F2	nuclear receptor subfamily 2 group F member 2(NR2F2)
LOC109110063	4.47106	2.16062	0.00152717	0.0504155	NP_004408	DUSP1	dual specificity phosphatase 1(DUSP1)
LOC109110073	0.202403	-2.3047	0.00293202	0.0570454	NP_116161	ZNF503	zinc finger protein 503(ZNF503)
LOC109110129	16.0137	4.00124	0.000397879	0.0480596	NP_001731	CALB2	calbindin 2(CALB2)
LOC109110130	7.02467	2.81243	0.00242928	0.0529533	NP_001731	CALB2	calbindin 2(CALB2)
LOC109110131	7.80671	2.96471	0.000580139	0.0480596	NP_001093203	ADCYAP1	adenylate cyclase activating polypeptide 1(ADCYAP1)
LOC109110220	7.26077	2.86012	0.00107863	0.0480596	NP_001310535	SYNDIG1	synapse differentiation inducing 1(SYNDIG1)
LOC109110223	2.89112	1.53163	0.00604114	0.0737233	NP_001310535	SYNDIG1	synapse differentiation inducing 1(SYNDIG1)
LOC109110230	4.63388	2.21222	0.00159647	0.0506657	NP_001290441	PDZD4	PDZ domain containing 4(PDZD4)
LOC109110232	2.97145	1.57117	0.00875851	0.0876066	XP_006713553	CLCN2	chloride voltage-gated channel 2(CLCN2)
LOC109110277	3.41336	1.77119	0.00497112	0.0681473	NP_001161860	CITED2	Cbp/p300 interacting transactivator with Glu/Asp rich carboxy-terminal domain 2(CITED2)
LOC109110339	4.88782	2.28919	0.00245969	0.0529732	NP_976031	NECTIN1	nectin cell adhesion molecule 1(NECTIN1)
LOC109110370	0.327636	-1.60983	0.00396022	0.0618718	-	-	-
LOC109110376	3.94524	1.98011	0.00322436	0.0591158	NP_004369	CRABP1	cellular retinoic acid binding protein 1(CRABP1)
LOC109110531	4.58354	2.19646	0.00125861	0.0488362	NP_001158238	ZFHX3	zinc finger homeobox 3(ZFHX3)
LOC109110535	0.191969	-2.38106	0.00134401	0.0493182	XP_016874523	RPH3A	rabphilin 3A(RPH3A)
LOC109110545	0.326566	-1.61455	0.00539726	0.0710577	NP_001009909	LUZP2	leucine zipper protein 2(LUZP2)
LOC109110693	4.61027	2.20485	0.00149958	0.0500013	NP_001670	ATP1B3	ATPase Na+/K+ transporting subunit beta 3(ATP1B3)
LOC109110713	2.88146	1.5268	0.00915296	0.0890198	XP_011507765	MR1	major histocompatibility complex, class I-related(MR1)
LOC109110836	0.257805	-1.95565	0.00172126	0.0506657	NP_005304	PDIA3	protein disulfide isomerase family A member 3(PDIA3)
LOC109110873	2.58151	1.36821	0.00985762	0.0925789	-	-	-
LOC109110874	2.64439	1.40294	0.00733546	0.0801039	NP_001340243	-	-
LOC109110896	0.308041	-1.69881	0.00786496	0.0830558	NP_001186789	KCNAB2	potassium voltage-gated channel subfamily A regulatory beta subunit 2(KCNAB2)
LOC109110906	0.17559	-2.50972	0.00079329	0.0480596	NP_001307076	CAMKV	CaM kinase like vesicle associated(CAMKV)
LOC109110913	3.61775	1.85509	0.00212513	0.0513977	NP_071746	NECAB1	N-terminal EF-hand calcium binding protein 1(NECAB1)
LOC109110933	0.369608	-1.43593	0.00812214	0.0843257	NP_001122098	SPIRE1	spire type actin nucleation factor 1(SPIRE1)
LOC109110991	5.26986	2.39777	0.00161131	0.0506657	NP_940685	MMD2	monocyte to macrophage differentiation associated 2(MMD2)
LOC109111006	2.99125	1.58075	0.00502416	0.0686106	NP_001271214	INPP5J	inositol polyphosphate-5-phosphatase J(INPP5J)
LOC109111025	0.37999	-1.39597	0.00936143	0.0899394	NP_001135917	ANK1	ankyrin 1(ANK1)
LOC109111059	3.38027	1.75714	0.00245309	0.0529712	-	-	-
LOC109111067	4.51368	2.1743	0.0013358	0.0493182	NP_004084	EFNB2	ephrin B2(EFNB2)
LOC109111074	7.50073	2.90703	0.00114034	0.0480596	NP_001139324	PROM1	prominin 1(PROM1)
LOC109111089	0.186493	-2.42281	0.00412503	0.0627773	NP_006110	FGF8	fibroblast growth factor 8(FGF8)
LOC109111138	0.30791	-1.69942	0.0040487	0.0623941	XP_016857405	KIAA1522	KIAA1522(KIAA1522)
LOC109111155	6.6021	2.72293	0.000640005	0.0480596	NP_085154	PRRT1	proline rich transmembrane protein 1(PRRT1)
LOC109111195	4.87159	2.28439	0.00178719	0.0506657	-	-	-
LOC109111245	3.63685	1.86269	0.00197693	0.0506657	XP_011508439	ARHGEF2	Rho/Rac guanine nucleotide exchange factor 2(ARHGEF2)
LOC109111349	3.66655	1.87442	0.00587527	0.0730074	NP_006485	ERF	ETS2 repressor factor(ERF)
LOC109111351	3.16816	1.66364	0.00386599	0.0613258	NP_001287964	ERF	ETS2 repressor factor(ERF)
LOC109111382	4.85061	2.27817	0.00110975	0.0480596	NP_001035719	NCALD	neurocalcin delta(NCALD)
LOC109111413	3.18444	1.67104	0.00630422	0.0750509	NP_003247	TIMP4	TIMP metallopeptidase inhibitor 4(TIMP4)
LOC109111430	0.111417	-3.16596	0.00114551	0.0480596	XP_011532443	GRIP2	glutamate receptor interacting protein 2(GRIP2)
LOC109111505	4.10576	2.03765	0.00185551	0.0506657	NP_085154	PRRT1	proline rich transmembrane protein 1(PRRT1)
LOC109111510	6.24813	2.64342	0.00160956	0.0506657	NP_001350453	-	-
LOC109111583	3.17421	1.6664	0.00821844	0.0846491	NP_003765	GALNT4	polypeptide N-acetylgalactosaminyltransferase 4(GALNT4)
LOC109111619	4.76243	2.2517	0.000966547	0.0480596	NP_001361775	-	-
LOC109111666	0.123498	-3.01744	0.000473778	0.0480596	NP_001375348	-	-
LOC109111686	8.51836	3.09058	0.00163791	0.0506657	NP_054703	TAC1	tachykinin precursor 1(TAC1)
LOC109111693	0.390524	-1.35652	0.00792991	0.0833156	NP_612435	GLCCI1	glucocorticoid induced 1(GLCCI1)
LOC109111698	2.68697	1.42598	0.00789879	0.0831942	NP_116000	PTP4A3	protein tyrosine phosphatase type IVA, member 3(PTP4A3)
LOC109111707	6.28577	2.65209	0.000960253	0.0480596	NP_004986	MMP14	matrix metallopeptidase 14(MMP14)
LOC109111713	3.83753	1.94018	0.00196445	0.0506657	NP_004986	MMP14	matrix metallopeptidase 14(MMP14)
LOC109111717	0.112894	-3.14696	0.00219365	0.0518058	NP_004343	CBLN1	cerebellin 1 precursor(CBLN1)
LOC109111719	4.99255	2.31978	0.00148124	0.0497835	NP_001095146	SAMD12	sterile alpha motif domain containing 12(SAMD12)
LOC109111752	8.90287	3.15427	0.000307597	0.0480596	NP_001358857	-	-
LOC109111765	5.99577	2.58395	0.000744604	0.0480596	NP_001358857	-	-
LOC109111796	0.193651	-2.36847	0.00213174	0.0513977	NP_001011666	CREB5	cAMP responsive element binding protein 5(CREB5)
LOC109111806	0.220508	-2.1811	0.00172181	0.0506657	NP_001193871	CSPG5	chondroitin sulfate proteoglycan 5(CSPG5)
LOC109111813	0.213596	-2.22704	0.00192161	0.0506657	NP_001418	EN2	engrailed homeobox 2(EN2)
LOC109111826	0.36421	-1.45716	0.00671167	0.0768123	XP_011524579	znf516	zinc finger protein 516(ZNF516)
LOC109111862	3.65523	1.86996	0.00657111	0.076307	-	-	-
LOC109112052	0.307558	-1.70107	0.00738173	0.0803991	XP_016871694	INPP5A	inositol polyphosphate-5-phosphatase A(INPP5A)
LOC109112099	0.255915	-1.96627	0.00232898	0.0524362	NP_055467	IPO13	importin 13(IPO13)
LOC109112132	7.45878	2.89894	0.000859293	0.0480596	XP_011516372	ADAMTSL1	ADAMTS like 1(ADAMTSL1)
LOC109112175	0.275223	-1.86133	0.00244394	0.0529712	XP_011511585	KALRN	kalirin, RhoGEF kinase(KALRN)
LOC109112206	3.43814	1.78163	0.00564234	0.0720151	XP_016868732	DENND3	DENN domain containing 3(DENND3)
LOC109112249	10.8423	3.4386	0.00110119	0.0480596	NP_872333	CABP7	calcium binding protein 7(CABP7)
LOC109112324	3.58382	1.8415	0.00236631	0.0529245	NP_536800	COLQ	collagen like tail subunit of asymmetric acetylcholinesterase(COLQ)
LOC109112339	4.45682	2.15602	0.00165127	0.0506657	NP_006069	CACNG2	calcium voltage-gated channel auxiliary subunit gamma 2(CACNG2)
LOC109112546	0.0750452	-3.7361	0.00731218	0.0799437	NP_001121177	serpina1	serpin family A member 1(SERPINA1)
LOC109112616	2.5067	1.32579	0.00996399	0.0930781	NP_001135858	PDK3	pyruvate dehydrogenase kinase 3(PDK3)
LOC109112621	0.325119	-1.62096	0.0047345	0.0664618	-	-	-
LOC109112641	0.0667637	-3.90479	0.00455739	0.065201	NP_000375	APOB	apolipoprotein B(APOB)
LOC109112644	15.8654	3.98781	0.000343926	0.0480596	NP_001245288	HPCAL1	hippocalcin like 1(HPCAL1)
LOC109112649	5.87178	2.5538	0.00163482	0.0506657	NP_001245288	HPCAL1	hippocalcin like 1(HPCAL1)
LOC109112677	0.180193	-2.47238	0.00143459	0.0493182	-	-	-
LOC109112818	5.14069	2.36196	0.00260273	0.0543461	NP_777594	SCN4B	sodium voltage-gated channel beta subunit 4(SCN4B)
LOC109112821	0.124853	-3.00169	0.00149702	0.0500013	NP_001276916	FILIP1	filamin A interacting protein 1(FILIP1)
LOC109112830	5.114	2.35445	0.00201171	0.0506657	NP_001374706	-	-
LOC109112857	4.35456	2.12253	0.00150127	0.0500013	NP_002232	KCNJ10	potassium voltage-gated channel subfamily J member 10(KCNJ10)
LOC109112925	0.255074	-1.97101	0.00204457	0.0508707	XP_016864279	UNC5C	unc-5 netrin receptor C(UNC5C)
LOC109113089	2.71958	1.44339	0.00955871	0.0910601	NP_004361	COL12A1	collagen type XII alpha 1 chain(COL12A1)
LOC109113099	0.289472	-1.7885	0.00583803	0.0728881	XP_005263378	UNC5C	unc-5 netrin receptor C(UNC5C)
LOC109113114	0.404588	-1.30548	0.00945057	0.0904357	XP_006715666	LATS1	large tumor suppressor kinase 1(LATS1)
LOC109113249	2.78065	1.47542	0.00655958	0.076307	XP_011536472	ZNF385A	zinc finger protein 385A(ZNF385A)
LOC109113275	2.54341	1.34676	0.00882539	0.0877074	NP_001243390	SLC12A2	solute carrier family 12 member 2(SLC12A2)
LOC109113303	5.00827	2.32431	0.00117446	0.0483929	NP_003704	PLPP3	phospholipid phosphatase 3(PLPP3)
LOC109113307	5.34576	2.4184	0.000857574	0.0480596	NP_003704	PLPP3	phospholipid phosphatase 3(PLPP3)
LOC109113390	4.03561	2.01279	0.00191451	0.0506657	NP_000589	IGFBP3	insulin like growth factor binding protein 3(IGFBP3)
LOC109113418	2.86968	1.52089	0.0051778	0.0696847	NP_001366390	-	-
LOC109113426	3.13409	1.64805	0.00709768	0.078898	NP_066918	SLC5A6	solute carrier family 5 member 6(SLC5A6)
LOC109113481	0.328698	-1.60517	0.00787965	0.0831165	NP_006025	TP53I11	tumor protein p53 inducible protein 11(TP53I11)
LOC109113497	3.57636	1.83849	0.00570433	0.0722704	NP_689540	AK7	adenylate kinase 7(AK7)
LOC109113504	9.37737	3.22918	0.000361219	0.0480596	NP_000352	THBD	thrombomodulin(THBD)
LOC109113578	2.55609	1.35394	0.00919856	0.0892298	XP_011535461	CLMN	calmin(CLMN)
LOC109113582	0.2268	-2.14051	0.0032824	0.0596567	NP_002513	NPTX1	neuronal pentraxin 1(NPTX1)
LOC109113598	2.79656	1.48365	0.00575696	0.0726215	NP_002094	GYS1	glycogen synthase 1(GYS1)
LOC109113657	16.9355	4.08198	0.00189743	0.0506657	XP_005265929	GABRP	gamma-aminobutyric acid type A receptor pi subunit(GABRP)
LOC109113683	2.82005	1.49572	0.00576716	0.0726215	NP_001101	ADAM10	ADAM metallopeptidase domain 10(ADAM10)
LOC109113710	2.79878	1.4848	0.00824926	0.0846491	NP_001186826	LAMP5	lysosomal associated membrane protein family member 5(LAMP5)
LOC109113714	0.382551	-1.38627	0.00629516	0.0750509	NP_057646	TLR7	toll like receptor 7(TLR7)
LOC109113728	5.22212	2.38464	0.000874831	0.0480596	-	-	-
LOC109113796	15.3676	3.94182	0.000615029	0.0480596	XP_011536254	CPNE8	copine 8(CPNE8)
LOC109113826	0.239762	-2.06033	0.00187292	0.0506657	NP_001337347	-	-
lrp4	4.30652	2.10652	0.00200857	0.0506657	NP_002325	LRP4	LDL receptor related protein 4(LRP4)
lrrtm2	4.17741	2.06261	0.00145844	0.0493743	NP_056379	LRRTM2	leucine rich repeat transmembrane neuronal 2(LRRTM2)
mgp	5.39622	2.43195	0.00215848	0.0516313	NP_000891	MGP	matrix Gla protein(MGP)
mkx	0.355474	-1.49219	0.00603522	0.0736995	NP_001229631	MKX	mohawk homeobox(MKX)
mpnd	0.362317	-1.46468	0.00661159	0.076307	NP_001287791	MPND	MPN domain containing(MPND)
mtf2	0.320805	-1.64023	0.00436294	0.0637448	NP_031384	MTF2	metal response element binding transcription factor 2(MTF2)
mxd4	3.84388	1.94256	0.00283573	0.0566381	NP_006445	MXD4	MAX dimerization protein 4(MXD4)
mybpc1	14.7391	3.88157	0.000273256	0.0480596	XP_006719471	MYBPC1	myosin binding protein C, slow type(MYBPC1)
myo1b	5.92256	2.56622	0.00094613	0.0480596	NP_001155291	MYO1B	myosin IB(MYO1B)
necab2	3.33213	1.73645	0.00356332	0.0601964	NP_001316678	NECAB2	N-terminal EF-hand calcium binding protein 2(NECAB2)
neurod6	4.34547	2.11951	0.00340644	0.0596567	NP_073565	NEUROD6	neuronal differentiation 6(NEUROD6)
ngef	14.1592	3.82367	0.000185887	0.0480596	XP_011509225	NGEF	neuronal guanine nucleotide exchange factor(NGEF)
ngrn	0.333598	-1.58382	0.00462751	0.0657149	NP_001028260	NGRN	neugrin, neurite outgrowth associated(NGRN)
nkx6-2	0.367235	-1.44523	0.00705829	0.0786955	NP_796374	nkx6-2	NK6 homeobox 2(NKX6-2)
npr3	4.46354	2.15819	0.00290584	0.0569411	NP_000899	NPR3	natriuretic peptide receptor 3(NPR3)
npy	37.0666	5.21205	0.000574327	0.0480596	NP_000896	NPY	neuropeptide Y(NPY)
nrgn	13.5542	3.76067	0.000294886	0.0480596	NP_002036	GAP43	growth associated protein 43(GAP43)
nrp2	6.26597	2.64754	0.000697664	0.0480596	NP_003863	NRP2	neuropilin 2(NRP2)
ogfod2	0.346627	-1.52855	0.0089545	0.0879178	NP_001291762	OGFOD2	2-oxoglutarate and iron dependent oxygenase domain containing 2(OGFOD2)
oxsr1	2.52557	1.33661	0.00824702	0.0846491	NP_005100	OXSR1	oxidative stress responsive 1(OXSR1)
plch1	9.86584	3.30244	0.000395141	0.0480596	XP_016861412	PLCH1	phospholipase C eta 1(PLCH1)
plcxd3	3.03321	1.60085	0.00563538	0.0720151	NP_001005473	PLCXD3	phosphatidylinositol specific phospholipase C X domain containing 3(PLCXD3)
pmp22	3.11049	1.63714	0.00650961	0.0761887	NP_696997	PMP22	peripheral myelin protein 22(PMP22)
ppfia2	4.03545	2.01273	0.00169264	0.0506657	XP_011537209	PPFIA2	PTPRF interacting protein alpha 2(PPFIA2)
ppp1r1b	0.187013	-2.41879	0.00103257	0.0480596	NP_115568	PPP1R1B	protein phosphatase 1 regulatory inhibitor subunit 1B(PPP1R1B)
ppp1r32	0.273316	-1.87136	0.00608595	0.0739425	NP_659454	PPP1R32	protein phosphatase 1 regulatory subunit 32(PPP1R32)
prkg1	7.10511	2.82886	0.00108396	0.0480596	NP_001091982	PRKG1	protein kinase, cGMP-dependent, type I(PRKG1)
ptn	5.54094	2.47013	0.000775852	0.0480596	NP_002816	PTN	pleiotrophin(PTN)
ptrf	3.85016	1.94492	0.00377951	0.0610756	NP_036364	PTRF	polymerase I and transcript release factor(PTRF)
pxdn	3.26441	1.70682	0.00330464	0.0596567	NP_036425	PXDN	peroxidasin(PXDN)
ralgds	3.63201	1.86077	0.00195459	0.0506657	NP_055964	RGL1	ral guanine nucleotide dissociation stimulator like 1(RGL1)
rhoj	2.86616	1.51912	0.00814876	0.0843803	NP_065714	RHOJ	ras homolog family member J(RHOJ)
rock2	3.74981	1.90682	0.00168905	0.0506657	XP_016860867	ROCK2	Rho associated coiled-coil containing protein kinase 2(ROCK2)
sdccag8	0.343897	-1.53995	0.00569924	0.0722551	NP_006633	SDCCAG8	serologically defined colon cancer antigen 8(SDCCAG8)
sema4c	3.37682	1.75566	0.00736369	0.0803178	XP_006712669	SEMA4C	semaphorin 4C(SEMA4C)
serpinc1	0.102531	-3.28587	0.00483554	0.0672705	NP_000479	SERPINC1	serpin family C member 1(SERPINC1)
serpinf1	3.68556	1.88188	0.00553354	0.0716743	NP_002606	SERPINF1	serpin family F member 1(SERPINF1)
sh2d3c	0.40081	-1.31901	0.00920826	0.0892773	NP_001136006	SH2D3C	SH2 domain containing 3C(SH2D3C)
shox	37.0129	5.20996	0.000438641	0.0480596	NP_000442	SHOX	short stature homeobox(SHOX)
slc12a5	4.97355	2.31428	0.0011266	0.0480596	NP_065759	SLC12A5	solute carrier family 12 member 5(SLC12A5)
slc2a1	3.05277	1.61012	0.00446827	0.0646786	NP_006507	SLC2A1	solute carrier family 2 member 1(SLC2A1)
slc39a13	0.347583	-1.52457	0.00588912	0.0730188	NP_001317174	SLC39A13	solute carrier family 39 member 13(SLC39A13)
slc6a20	4.77445	2.25533	0.00313231	0.058217	NP_064593	SLC6A20	solute carrier family 6 member 20(SLC6A20)
slc6a9	3.37549	1.7551	0.00360561	0.0603729	NP_964012	SLC6A9	solute carrier family 6 member 9(SLC6A9)
slco2a1	4.15747	2.0557	0.00228023	0.0524021	NP_005621	SLCO2A1	solute carrier organic anion transporter family member 2A1(SLCO2A1)
slitrk4	3.57237	1.83688	0.00363849	0.0605958	NP_775101	SLITRK4	SLIT and NTRK like family member 4(SLITRK4)
smyd2	0.328221	-1.60726	0.00438566	0.0639811	NP_064582	SMYD2	SET and MYND domain containing 2(SMYD2)
spock1	2.39987	1.26295	0.00919267	0.0892193	NP_004589	SPOCK1	SPARC/osteonectin, cwcv and kazal like domains proteoglycan 1(SPOCK1)
st18	2.68025	1.42237	0.00880773	0.0877074	NP_001339779	-	-
stum	3.01748	1.59334	0.00667689	0.0766029	NP_001003665	STUM	stum, mechanosensory transduction mediator homolog(STUM)
susd5	6.32039	2.66001	0.00110205	0.0480596	NP_056366	SUSD5	sushi domain containing 5(SUSD5)
syndig1	2.80563	1.48833	0.00576869	0.0726215	NP_001310535	SYNDIG1	synapse differentiation inducing 1(SYNDIG1)
syt14	26.9529	4.75237	0.000199581	0.0480596	XP_006711325	SYT14	synaptotagmin 14(SYT14)
tap1	3.01263	1.59102	0.00795753	0.0834643	NP_000584	TAP1	transporter 1, ATP binding cassette subfamily B member(TAP1)
tnni3k	14.0935	3.81696	0.000419891	0.0480596	NP_057062	TNNI3K	TNNI3 interacting kinase(TNNI3K)
tox2	4.06678	2.02389	0.00163295	0.0506657	NP_001092267	TOX2	TOX high mobility group box family member 2(TOX2)
unc5a	4.99878	2.32158	0.00089572	0.0480596	NP_588610	UNC5A	unc-5 netrin receptor A(UNC5A)
vat1l	8.15553	3.02778	0.000701196	0.0480596	NP_065978	VAT1L	vesicle amine transport 1 like(VAT1L)
vegfa	2.9179	1.54493	0.00711725	0.078901	NP_001165099	VEGFA	vascular endothelial growth factor A(VEGFA)
vgf	13.5707	3.76242	0.000793779	0.0480596	NP_003369	VGF	VGF nerve growth factor inducible(VGF)
zc4h2	3.15143	1.65601	0.00383373	0.0610756	NP_061154	ZC4H2	zinc finger C4H2-type containing(ZC4H2)
zdhhc2	0.19048	-2.39229	0.000833616	0.0480596	NP_057437	ZDHHC2	zinc finger DHHC-type containing 2(ZDHHC2)
znf385a	3.26287	1.70614	0.00359495	0.0602487	NP_001124439	ZNF385A	zinc finger protein 385A(ZNF385A)

## Sheet: Gill
Sequence_id	Fold Change	logFC	p-value	FDR	Refseq	Gene_symbol	Gene_Name
cdk1	0.268476	-1.89714	0.00141895	0.103421	NP_001163878	CDK1	cyclin dependent kinase 1(CDK1)
cdk17	2.34702	1.23083	0.00414722	0.128851	XP_016874895	CDK17	cyclin dependent kinase 17(CDK17)
cdk2	0.404003	-1.30756	0.00603555	0.146808	NP_001789	CDK2	cyclin dependent kinase 2(CDK2)
cemip	3.52662	1.81829	0.00197523	0.107191	NP_001280227	cemip	cell migration inducing hyaluronan binding protein(CEMIP)
clock	0.425373	-1.2332	0.00496327	0.13578	NP_001254772	CLOCK	clock circadian regulator(CLOCK)
crot	0.384898	-1.37745	0.00588398	0.145577	NP_066974	CROT	carnitine O-octanoyltransferase(CROT)
dtymk	0.310413	-1.68774	0.002807	0.111877	NP_036277	DTYMK	deoxythymidylate kinase(DTYMK)
dut	0.237889	-2.07164	0.00151818	0.103421	NP_001939	DUT	deoxyuridine triphosphatase(DUT)
esd	0.341559	-1.54979	0.002835	0.112328	XP_011533256	ESD	esterase D(ESD)
ezh2	0.478982	-1.06196	0.00910282	0.178188	NP_001190176	EZH2	enhancer of zeste 2 polycomb repressive complex 2 subunit(EZH2)
gldc	2.18193	1.1256	0.00669449	0.155452	NP_000161	GLDC	glycine decarboxylase(GLDC)
gprc6a	0.383601	-1.38232	0.00630425	0.150451	XP_016865964	GPRC6A	G protein-coupled receptor class C group 6 member A(GPRC6A)
hdac8	0.474166	-1.07654	0.00992922	0.186536	NP_060956	HDAC8	histone deacetylase 8(HDAC8)
hif1an	6.34062	2.66462	0.000302081	0.103421	NP_060372	HIF1AN	hypoxia inducible factor 1 alpha subunit inhibitor(HIF1AN)
hmgn2	0.456373	-1.13172	0.00925403	0.179863	NP_005508	HMGN2	high mobility group nucleosomal binding domain 2(HMGN2)
kif15	0.293214	-1.76998	0.00107143	0.103421	NP_064627	KIF15	kinesin family member 15(KIF15)
kif20a	0.227667	-2.135	0.00060125	0.103421	NP_005724	KIF20A	kinesin family member 20A(KIF20A)
kif23	0.313086	-1.67537	0.00149998	0.103421	NP_004847	KIF23	kinesin family member 23(KIF23)
LOC109045538	2.68281	1.42375	0.00352011	0.122336	NP_001838	COL4A6	collagen type IV alpha 6 chain(COL4A6)
LOC109045716	0.19055	-2.39176	0.000580894	0.103421	-	-	-
LOC109045737	0.204936	-2.28675	0.000627974	0.103421	NP_000469	ALPL	alkaline phosphatase, liver/bone/kidney(ALPL)
LOC109045775	4.70697	2.2348	0.00435492	0.129995	NP_001309767	KCNMA1	potassium calcium-activated channel subfamily M alpha 1(KCNMA1)
LOC109045847	0.430898	-1.21458	0.0052625	0.139536	NP_078902	VTCN1	V-set domain containing T cell activation inhibitor 1(VTCN1)
LOC109046155	0.232515	-2.1046	0.000864339	0.103421	NP_001252531	SMC2	structural maintenance of chromosomes 2(SMC2)
LOC109046168	0.428089	-1.22402	0.00775615	0.16456	NP_003881	FCGBP	Fc fragment of IgG binding protein(FCGBP)
LOC109046263	2.20915	1.14349	0.00975395	0.184823	NP_001036134	arhgap24	Rho GTPase activating protein 24(ARHGAP24)
LOC109046471	5.74678	2.52275	0.000606383	0.103421	NP_000490	CYP1A1	cytochrome P450 family 1 subfamily A member 1(CYP1A1)
LOC109046497	2.83755	1.50465	0.00216084	0.107546	NP_689851	CCER1	coiled-coil glutamate rich protein 1(CCER1)
LOC109046594	0.298243	-1.74544	0.00177457	0.106382	NP_001955	EGR1	early growth response 1(EGR1)
LOC109046624	2.57198	1.36288	0.00503631	0.136538	NP_116244	HSH2D	hematopoietic SH2 domain containing(HSH2D)
LOC109046772	2.67123	1.4175	0.00225816	0.107546	NP_067028	RHOU	ras homolog family member U(RHOU)
LOC109047177	2.58225	1.36863	0.00318566	0.117207	NP_001722	BTG1	BTG anti-proliferation factor 1(BTG1)
LOC109047202	2.39993	1.26299	0.00396663	0.127824	NP_001116857	BCOR	BCL6 corepressor(BCOR)
LOC109047273	0.424514	-1.23611	0.00723945	0.160863	NP_000675	ADRB1	adrenoceptor beta 1(ADRB1)
LOC109047310	0.407965	-1.29348	0.00714947	0.16038	NP_000413	krt17	keratin 17(KRT17)
LOC109047459	2.4261	1.27864	0.00440717	0.130434	-	-	-
LOC109047590	3.97127	1.9896	0.00109488	0.103421	NP_001340275	-	-
LOC109047725	0.309023	-1.69421	0.00800076	0.167588	NP_001275885	IFI27	interferon alpha inducible protein 27(IFI27)
LOC109047735	21.6725	4.43779	9.79e-05	0.103421	-	-	-
LOC109047802	0.355572	-1.49179	0.00279009	0.111843	NP_001817	CKS1B	CDC28 protein kinase regulatory subunit 1B(CKS1B)
LOC109047941	0.255339	-1.96951	0.00126238	0.103421	NP_001273615	CKAP2	cytoskeleton associated protein 2(CKAP2)
LOC109047943	0.404133	-1.3071	0.00476254	0.134093	NP_954657	KRT18	keratin 18(KRT18)
LOC109048022	2.33138	1.22118	0.0048905	0.134472	-	-	-
LOC109048049	14.7512	3.88276	0.000150577	0.103421	NP_071356	EGLN3	egl-9 family hypoxia inducible factor 3(EGLN3)
LOC109048144	5.17064	2.37034	0.0005642	0.103421	NP_001029058	CXCL12	C-X-C motif chemokine ligand 12(CXCL12)
LOC109048339	4.2806	2.09781	0.000640973	0.103421	NP_002323	LRP1	LDL receptor related protein 1(LRP1)
LOC109048343	0.34607	-1.53086	0.0027692	0.111363	NP_000290	pkp1	plakophilin 1(PKP1)
LOC109048368	5.56126	2.47541	0.000396942	0.103421	NP_000293	PLOD1	procollagen-lysine,2-oxoglutarate 5-dioxygenase 1(PLOD1)
LOC109048372	36.8632	5.20411	8.89e-05	0.103421	NP_071334	EGLN1	egl-9 family hypoxia inducible factor 1(EGLN1)
LOC109048427	0.389372	-1.36078	0.00420022	0.128851	XP_024304726	-	-
LOC109048430	0.281345	-1.82959	0.00182578	0.107013	XP_024304726	-	-
LOC109048509	0.424885	-1.23486	0.00727569	0.161232	NP_003309	TTK	TTK protein kinase(TTK)
LOC109048626	0.389993	-1.35848	0.00479854	0.134105	NP_001005337	pkp1	plakophilin 1(PKP1)
LOC109048693	0.310243	-1.68853	0.00152964	0.103421	NP_001284533	CDCA3	cell division cycle associated 3(CDCA3)
LOC109048696	2.4311	1.28161	0.00867747	0.175304	NP_055077	P3H3	prolyl 3-hydroxylase 3(P3H3)
LOC109048699	2.39126	1.25777	0.00569955	0.145065	NP_000356	TPI1	triosephosphate isomerase 1(TPI1)
LOC109048749	2.95663	1.56395	0.00311374	0.117207	NP_004701	SYNGR2	synaptogyrin 2(SYNGR2)
LOC109048787	3.07411	1.62017	0.00540773	0.141591	NP_001341531	-	-
LOC109048971	0.489289	-1.03124	0.00923046	0.179617	NP_005029	PPID	peptidylprolyl isomerase D(PPID)
LOC109048974	4.39543	2.136	0.000578185	0.103421	NP_001892	CTGF	connective tissue growth factor(CTGF)
LOC109048979	2.22549	1.15412	0.00793331	0.166813	NP_003750	SLC4A4	solute carrier family 4 member 4(SLC4A4)
LOC109048999	2.27242	1.18423	0.00755933	0.163335	NP_874389	CREM	cAMP responsive element modulator(CREM)
LOC109049059	2.49335	1.31809	0.00487522	0.134472	XP_016862499	BDH1	3-hydroxybutyrate dehydrogenase, type 1(BDH1)
LOC109049127	2.54522	1.34779	0.00435035	0.129995	NP_001290459	TUBB6	tubulin beta 6 class V(TUBB6)
LOC109049135	0.318589	-1.65023	0.00157671	0.103421	NP_001307540	KPNA2	karyopherin subunit alpha 2(KPNA2)
LOC109049243	0.324529	-1.62358	0.00511985	0.137558	NP_079534	VWA7	von Willebrand factor A domain containing 7(VWA7)
LOC109049349	2.79533	1.48302	0.00582173	0.145065	NP_874389	CREM	cAMP responsive element modulator(CREM)
LOC109049468	2.31774	1.21272	0.00944357	0.182041	NP_001073888	UNK	unkempt family zinc finger(UNK)
LOC109049517	2.7267	1.44715	0.00248308	0.107656	NP_932076	NME7	NME/NM23 family member 7(NME7)
LOC109049589	0.311441	-1.68297	0.00158315	0.103421	NP_473368	ANKH	ANKH inorganic pyrophosphate transport regulator(ANKH)
LOC109049599	2.60945	1.38375	0.00538115	0.14112	NP_001309997	PFKP	phosphofructokinase, platelet(PFKP)
LOC109049634	4.50575	2.17177	0.00264102	0.109435	NP_000185	HPRT1	hypoxanthine phosphoribosyltransferase 1(HPRT1)
LOC109049698	3.22941	1.69127	0.00223057	0.107546	NP_004554	PCK2	phosphoenolpyruvate carboxykinase 2, mitochondrial(PCK2)
LOC109049772	2.62947	1.39477	0.00691318	0.157225	NP_001305723	Cox4I1	cytochrome c oxidase subunit 4I1(COX4I1)
LOC109049818	2.59035	1.37315	0.0068141	0.156486	-	-	-
LOC109049824	2.89316	1.53265	0.00214418	0.107546	XP_024309860	-	-
LOC109049851	2.53117	1.3398	0.00560349	0.143966	NP_653252	PXDNL	peroxidasin like(PXDNL)
LOC109049991	0.291265	-1.7796	0.00197213	0.107191	NP_689775	CDCA2	cell division cycle associated 2(CDCA2)
LOC109050015	2.73187	1.44989	0.00439599	0.130434	NP_859530	CERS2	ceramide synthase 2(CERS2)
LOC109050338	2.9241	1.54799	0.00277001	0.111363	NP_005219	EGFR	epidermal growth factor receptor(EGFR)
LOC109050462	2.70175	1.43389	0.00331261	0.118452	-	-	-
LOC109050669	2.57294	1.36342	0.00315118	0.117207	-	-	-
LOC109050707	3.44174	1.78314	0.00127493	0.103421	NP_085150	KDM7A	lysine demethylase 7A(KDM7A)
LOC109050908	0.301489	-1.72982	0.00297971	0.115379	NP_060606	ASPM	abnormal spindle microtubule assembly(ASPM)
LOC109051116	2.51214	1.32892	0.00942119	0.182015	NP_006099	SPON1	spondin 1(SPON1)
LOC109051117	6.244	2.64247	0.00582247	0.145065	XP_016867426	TECPR1	tectonin beta-propeller repeat containing 1(TECPR1)
LOC109051150	0.157227	-2.66908	0.000558051	0.103421	NP_067628	CHST6	carbohydrate sulfotransferase 6(CHST6)
LOC109051158	2.37528	1.2481	0.00729351	0.161331	NP_006409	OLFM4	olfactomedin 4(OLFM4)
LOC109051161	2.55385	1.35267	0.007054	0.159326	NP_006409	OLFM4	olfactomedin 4(OLFM4)
LOC109051186	2.79077	1.48066	0.00360777	0.123847	NP_001094064	SNRK	SNF related kinase(SNRK)
LOC109051274	5.0801	2.34486	0.00402705	0.128246	NP_001371166	-	-
LOC109051324	0.213599	-2.22702	0.00173681	0.105771	NP_037359	ACAN	aggrecan(ACAN)
LOC109051377	2.38185	1.25208	0.00460208	0.131677	XP_011537047	VPS37B	VPS37B, ESCRT-I subunit(VPS37B)
LOC109051529	4.96137	2.31074	0.00202326	0.107318	NP_002266	KRT15	keratin 15(KRT15)
LOC109051661	0.336759	-1.57021	0.00248803	0.107656	NP_001139487	DLGAP5	DLG associated protein 5(DLGAP5)
LOC109051704	2.8457	1.50878	0.00343106	0.120549	-	-	-
LOC109051710	3.10057	1.63253	0.00214862	0.107546	-	-	-
LOC109051716	3.57302	1.83715	0.00225274	0.107546	NP_665811	AIFM1	apoptosis inducing factor, mitochondria associated 1(AIFM1)
LOC109051881	0.339871	-1.55694	0.00371946	0.125093	NP_001186883	ACTG1	actin gamma 1(ACTG1)
LOC109051885	2.2825	1.19062	0.00640017	0.151858	NP_006460	IVNS1ABP	influenza virus NS1A binding protein(IVNS1ABP)
LOC109052005	3.52017	1.81565	0.00103449	0.103421	NP_000812	GGCX	gamma-glutamyl carboxylase(GGCX)
LOC109052012	15.5734	3.96101	0.000329616	0.103421	NP_001171573	LOX	lysyl oxidase(LOX)
LOC109052131	0.294931	-1.76155	0.00161108	0.103421	NP_008950	UBE2C	ubiquitin conjugating enzyme E2 C(UBE2C)
LOC109052189	0.421895	-1.24504	0.0061256	0.147992	NP_054753	ASF1A	anti-silencing function 1A histone chaperone(ASF1A)
LOC109052274	2.22564	1.15422	0.00696356	0.158152	NP_002309	LOXL2	lysyl oxidase like 2(LOXL2)
LOC109052358	2.38558	1.25434	0.00645619	0.152747	XP_005250008	GIMAP8	GTPase, IMAP family member 8(GIMAP8)
LOC109052414	2.9263	1.54908	0.00232006	0.107656	NP_001333043	FNIP1	folliculin interacting protein 1(FNIP1)
LOC109052440	3.42982	1.77813	0.00117154	0.103421	NP_036272	SLC25A10	solute carrier family 25 member 10(SLC25A10)
LOC109052557	17.7606	4.15061	0.000192785	0.103421	NP_055275	CSDC2	cold shock domain containing C2(CSDC2)
LOC109052613	0.354506	-1.49612	0.00486672	0.134472	NP_001437	FABP7	fatty acid binding protein 7(FABP7)
LOC109052739	0.471731	-1.08396	0.00704862	0.159326	NP_078918	GALNT12	polypeptide N-acetylgalactosaminyltransferase 12(GALNT12)
LOC109052884	0.256415	-1.96344	0.000976878	0.103421	XP_005247986	TACC3	transforming acidic coiled-coil containing protein 3(TACC3)
LOC109052908	0.33303	-1.58628	0.00698162	0.158343	NP_003238	THBS2	thrombospondin 2(THBS2)
LOC109052995	0.303035	-1.72244	0.00237496	0.107656	XP_005247010	B3GNT7	UDP-GlcNAc:betaGal beta-1,3-N-acetylglucosaminyltransferase 7(B3GNT7)
LOC109053018	3.23922	1.69565	0.00152682	0.103421	NP_006460	IVNS1ABP	influenza virus NS1A binding protein(IVNS1ABP)
LOC109053168	7.30286	2.86846	0.000228779	0.103421	NP_001193880	SLC16A3	solute carrier family 16 member 3(SLC16A3)
LOC109053336	0.343703	-1.54077	0.00289832	0.113485	NP_002987	CX3CL1	C-X3-C motif chemokine ligand 1(CX3CL1)
LOC109053466	0.346558	-1.52883	0.00400515	0.128126	NP_001041695	ADORA1	adenosine A1 receptor(ADORA1)
LOC109053533	0.258549	-1.95149	0.00123782	0.103421	NP_002349	MAD2L1	MAD2 mitotic arrest deficient-like 1 (yeast)(MAD2L1)
LOC109053607	170.728	7.41556	5.95e-05	0.103421	-	-	-
LOC109053782	0.458305	-1.12562	0.00730957	0.161331	NP_659401	TRMT10B	tRNA methyltransferase 10B(TRMT10B)
LOC109053795	2.738	1.45312	0.0040479	0.128246	XP_011518916	CLEC4E	C-type lectin domain family 4 member E(CLEC4E)
LOC109053861	3.50382	1.80893	0.000952193	0.103421	XP_016878683	EEF2K	eukaryotic elongation factor 2 kinase(EEF2K)
LOC109053955	0.41531	-1.26774	0.0055085	0.14232	NP_002429	MRC1	mannose receptor, C type 1(MRC1)
LOC109053966	0.459273	-1.12258	0.00921588	0.179546	XP_006712859	CASP10	caspase 10(CASP10)
LOC109053985	0.322774	-1.6314	0.00184764	0.107013	NP_001139438	MKI67	marker of proliferation Ki-67(MKI67)
LOC109054117	0.33468	-1.57914	0.00413581	0.128851	NP_001240778	VTCN1	V-set domain containing T cell activation inhibitor 1(VTCN1)
LOC109054124	0.339297	-1.55938	0.00242201	0.107656	NP_000013	ADA	adenosine deaminase(ADA)
LOC109054219	0.435905	-1.19792	0.00796986	0.167367	XP_011523572	ATAD5	ATPase family, AAA domain containing 5(ATAD5)
LOC109054242	2.25227	1.17138	0.00681391	0.156486	NP_001274117	ODC1	ornithine decarboxylase 1(ODC1)
LOC109054333	0.229122	-2.12581	0.00320052	0.117207	NP_001310479	ZC3H12A	zinc finger CCCH-type containing 12A(ZC3H12A)
LOC109054340	7.15148	2.83824	0.000297424	0.103421	NP_000293	PLOD1	procollagen-lysine,2-oxoglutarate 5-dioxygenase 1(PLOD1)
LOC109054492	0.335939	-1.57373	0.0026977	0.11007	NP_001171810	CD84	CD84 molecule(CD84)
LOC109054556	0.233811	-2.09658	0.00688887	0.157106	NP_001365164	-	-
LOC109054570	9.4898	3.24638	0.000450469	0.103421	XP_011537839	NT5C2	5'-nucleotidase, cytosolic II(NT5C2)
LOC109054573	0.2711	-1.8831	0.00166916	0.104504	NP_001493	GP2	glycoprotein 2(GP2)
LOC109054576	0.204011	-2.29328	0.00244184	0.107656	NP_001365690	-	-
LOC109054783	0.392841	-1.34798	0.00592938	0.145577	NP_000168	GSN	gelsolin(GSN)
LOC109054792	0.260394	-1.94123	0.00142554	0.103421	NP_127490	ZWINT	ZW10 interacting kinetochore protein(ZWINT)
LOC109054814	3.27957	1.71351	0.00222141	0.107546	NP_009101	TESK2	testis-specific kinase 2(TESK2)
LOC109054930	2.39652	1.26094	0.00896665	0.177089	NP_002023	FTH1	ferritin heavy chain 1(FTH1)
LOC109055050	4.04333	2.01555	0.00240996	0.107656	NP_689559	SLC43A2	solute carrier family 43 member 2(SLC43A2)
LOC109055217	0.169209	-2.56312	0.000580754	0.103421	NP_005554	STMN1	stathmin 1(STMN1)
LOC109055238	0.281649	-1.82803	0.00578716	0.145065	XP_006724305	MCM5	minichromosome maintenance complex component 5(MCM5)
LOC109055390	3.24916	1.70006	0.00331373	0.118452	NP_000337	SOX9	SRY-box 9(SOX9)
LOC109055393	12.6164	3.65723	0.000454644	0.103421	NP_001017962	P4HA1	prolyl 4-hydroxylase subunit alpha 1(P4HA1)
LOC109055421	0.28783	-1.79671	0.00194442	0.107191	NP_001269312	PTTG1	pituitary tumor-transforming 1(PTTG1)
LOC109055498	2.93359	1.55267	0.0029533	0.115074	XP_011515673	PKHD1L1	polycystic kidney and hepatic disease 1 (autosomal recessive)-like 1(PKHD1L1)
LOC109055595	0.147625	-2.76	0.000569086	0.103421	NP_079534	VWA7	von Willebrand factor A domain containing 7(VWA7)
LOC109055721	2.17052	1.11804	0.00900299	0.177089	NP_001356420	-	-
LOC109055723	2.1996	1.13724	0.00773122	0.164244	NP_002559	PABPC1	poly(A) binding protein cytoplasmic 1(PABPC1)
LOC109055752	0.421192	-1.24745	0.00590137	0.145577	NP_036544	H2AFV	H2A histone family member V(H2AFV)
LOC109055787	2.5884	1.37206	0.00386076	0.127071	NP_001340766	-	-
LOC109055818	0.443542	-1.17286	0.00837439	0.172105	NP_001304994	RRM1	ribonucleotide reductase catalytic subunit M1(RRM1)
LOC109055847	3.23382	1.69324	0.00232447	0.107656	NP_001139184	NUPR2	nuclear protein 2, transcriptional regulator(NUPR2)
LOC109055890	4.65934	2.22013	0.00161637	0.103421	XP_011537839	NT5C2	5'-nucleotidase, cytosolic II(NT5C2)
LOC109055903	3.73773	1.90216	0.00103137	0.103421	NP_001171649	GYG1	glycogenin 1(GYG1)
LOC109056002	0.347988	-1.52289	0.00357027	0.123073	NP_005906	MCM6	minichromosome maintenance complex component 6(MCM6)
LOC109056102	5.01924	2.32747	0.000497991	0.103421	NP_060372	HIF1AN	hypoxia inducible factor 1 alpha subunit inhibitor(HIF1AN)
LOC109056133	4.06525	2.02335	0.000768994	0.103421	NP_004596	SULT2B1	sulfotransferase family 2B member 1(SULT2B1)
LOC109056139	2.77478	1.47237	0.00254061	0.107656	NP_001159933	MPP1	membrane palmitoylated protein 1(MPP1)
LOC109056189	0.251927	-1.98892	0.00116345	0.103421	NP_056076	NCAPD3	non-SMC condensin II complex subunit D3(NCAPD3)
LOC109056190	0.239062	-2.06455	0.00091144	0.103421	NP_056076	NCAPD3	non-SMC condensin II complex subunit D3(NCAPD3)
LOC109056203	3.11051	1.63715	0.00289177	0.113485	NP_005321	HBE1	hemoglobin subunit epsilon 1(HBE1)
LOC109056206	9.7627	3.28728	0.000181492	0.103421	NP_005323	HBZ	hemoglobin subunit zeta(HBZ)
LOC109056282	0.487296	-1.03713	0.00961107	0.183335	NP_002362	MAL	mal, T-cell differentiation protein(MAL)
LOC109056363	2.21885	1.14981	0.00919164	0.179499	-	-	-
LOC109056469	2.18186	1.12556	0.00592458	0.145577	XP_016883033	KMT2B	lysine methyltransferase 2B(KMT2B)
LOC109056470	0.411323	-1.28166	0.00396907	0.127824	NP_003736	SOCS1	suppressor of cytokine signaling 1(SOCS1)
LOC109056590	3.37278	1.75394	0.00196006	0.107191	XP_016862824	IL17RC	interleukin 17 receptor C(IL17RC)
LOC109056668	2.48002	1.31035	0.00460552	0.131677	NP_006507	SLC2A1	solute carrier family 2 member 1(SLC2A1)
LOC109056673	3.99855	1.99948	0.000748235	0.103421	NP_006507	SLC2A1	solute carrier family 2 member 1(SLC2A1)
LOC109056701	0.368817	-1.43902	0.00441841	0.130434	NP_001316570	SPDL1	spindle apparatus coiled-coil protein 1(SPDL1)
LOC109056726	2.36312	1.24069	0.00570961	0.145065	NP_003113	SPINK1	serine peptidase inhibitor, Kazal type 1(SPINK1)
LOC109056812	0.133197	-2.90837	0.000743551	0.103421	NP_001170826	MSLN	mesothelin(MSLN)
LOC109056983	0.301914	-1.72779	0.00155065	0.103421	XP_016871318	TMEM26	transmembrane protein 26(TMEM26)
LOC109057011	3.63286	1.8611	0.00112661	0.103421	NP_057071	HEBP1	heme binding protein 1(HEBP1)
LOC109057047	0.475423	-1.07272	0.00762671	0.163737	NP_542165	DDX39B	DExD-box helicase 39B(DDX39B)
LOC109057112	36.0384	5.17146	8.68e-05	0.103421	NP_001229537	NCAM1	neural cell adhesion molecule 1(NCAM1)
LOC109057161	5.42439	2.43946	0.0012852	0.103421	NP_005518	HSPA1L	heat shock protein family A (Hsp70) member 1 like(HSPA1L)
LOC109057177	3.3322	1.73647	0.0015806	0.103421	NP_940954	FAM89A	family with sequence similarity 89 member A(FAM89A)
LOC109057248	2.73402	1.45102	0.00318875	0.117207	NP_005600	PYGM	phosphorylase, glycogen, muscle(PYGM)
LOC109057293	4.18395	2.06487	0.000719143	0.103421	NP_073728	PER2	period circadian clock 2(PER2)
LOC109057327	2.73278	1.45037	0.0099377	0.186536	NP_001307748	COQ10B	coenzyme Q10B(COQ10B)
LOC109057329	3.48453	1.80096	0.00187335	0.107191	NP_073728	PER2	period circadian clock 2(PER2)
LOC109057472	4.82668	2.27103	0.000726383	0.103421	NP_002617	PFKL	phosphofructokinase, liver type(PFKL)
LOC109057547	2.38845	1.25607	0.00598602	0.14647	NP_001340928	-	-
LOC109057569	3.42057	1.77424	0.00182363	0.107013	NP_001368852	-	-
LOC109057602	0.229449	-2.12376	0.000997499	0.103421	XP_005249638	AGR2	anterior gradient 2, protein disulphide isomerase family member(AGR2)
LOC109057662	0.245447	-2.02652	0.000997091	0.103421	NP_001307540	KPNA2	karyopherin subunit alpha 2(KPNA2)
LOC109057728	0.44721	-1.16097	0.00903523	0.177089	NP_443086	CREB3L1	cAMP responsive element binding protein 3 like 1(CREB3L1)
LOC109057763	0.287289	-1.79943	0.00255763	0.107656	XP_011542497	NID1	nidogen 1(NID1)
LOC109057769	0.27486	-1.86323	0.00318825	0.117207	NP_000129	FBN1	fibrillin 1(FBN1)
LOC109057770	0.333327	-1.58499	0.00463388	0.131677	XP_011526096	ADGRE1	adhesion G protein-coupled receptor E1(ADGRE1)
LOC109057771	0.320953	-1.63957	0.005116	0.137558	XP_016865910	ADGRF5	adhesion G protein-coupled receptor F5(ADGRF5)
LOC109057824	0.356784	-1.48688	0.00337501	0.11986	NP_001336028	-	-
LOC109057996	0.297764	-1.74776	0.004068	0.128635	NP_004861	MPDU1	mannose-P-dolichol utilization defect 1(MPDU1)
LOC109058034	3.62604	1.8584	0.00132698	0.103421	NP_064706	MNT	MAX network transcriptional repressor(MNT)
LOC109058285	3.23273	1.69275	0.00129098	0.103421	NP_085150	KDM7A	lysine demethylase 7A(KDM7A)
LOC109058335	2.41658	1.27297	0.00991499	0.186536	NP_001284534	TNFRSF14	TNF receptor superfamily member 14(TNFRSF14)
LOC109058386	0.393018	-1.34733	0.00736764	0.162021	NP_057703	PLAC8	placenta specific 8(PLAC8)
LOC109058432	2.18261	1.12606	0.00765977	0.163997	NP_001098549	FBRS	fibrosin(FBRS)
LOC109058443	3.15739	1.65873	0.00151452	0.103421	NP_001013275	bcam	basal cell adhesion molecule (Lutheran blood group)(BCAM)
LOC109058482	2.18275	1.12615	0.00750955	0.162777	NP_001372965	-	-
LOC109058658	0.180716	-2.46821	0.00936018	0.181215	NP_001157570	VCAN	versican(VCAN)
LOC109059050	0.253158	-1.98189	0.00115448	0.103421	NP_001271188	KIF20B	kinesin family member 20B(KIF20B)
LOC109059201	2.76734	1.4685	0.00551346	0.14232	NP_001013633	LURAP1	leucine rich adaptor protein 1(LURAP1)
LOC109059236	0.460473	-1.11881	0.00772965	0.164244	XP_016861958	MYLK	myosin light chain kinase(MYLK)
LOC109059239	0.39616	-1.33585	0.00338636	0.119913	NP_002977	CCL11	C-C motif chemokine ligand 11(CCL11)
LOC109059253	0.41023	-1.2855	0.00513691	0.137792	XP_005252197	WNK2	WNK lysine deficient protein kinase 2(WNK2)
LOC109059267	2.57651	1.36542	0.00959455	0.183335	XP_011541220	dscaml1	DS cell adhesion molecule like 1(DSCAML1)
LOC109059280	0.372897	-1.42315	0.00446319	0.131285	NP_001184224	ECM2	extracellular matrix protein 2(ECM2)
LOC109059328	0.288922	-1.79125	0.00201803	0.107318	NP_060606	ASPM	abnormal spindle microtubule assembly(ASPM)
LOC109059352	3.13771	1.64971	0.00199013	0.107291	NP_001335329	-	-
LOC109059445	0.250827	-1.99523	0.00101306	0.103421	NP_001058	TOP2A	topoisomerase (DNA) II alpha(TOP2A)
LOC109059591	2.20837	1.14298	0.00829805	0.171629	NP_001010000	ARHGAP28	Rho GTPase activating protein 28(ARHGAP28)
LOC109059603	2.70399	1.43509	0.00983047	0.185796	-	-	-
LOC109059654	0.353884	-1.49865	0.00210578	0.107546	NP_075555	FOXL2	forkhead box L2(FOXL2)
LOC109059704	3.05487	1.61111	0.00194973	0.107191	-	-	-
LOC109059847	2.50022	1.32205	0.00548437	0.142239	NP_001892	CTGF	connective tissue growth factor(CTGF)
LOC109059887	0.227513	-2.13598	0.00255855	0.107656	XP_006724305	MCM5	minichromosome maintenance complex component 5(MCM5)
LOC109059962	0.439355	-1.18654	0.00542539	0.141725	NP_000454	UGT1A1	UDP glucuronosyltransferase family 1 member A1(UGT1A1)
LOC109060023	0.0781729	-3.67719	0.000828627	0.103421	NP_078916	YRDC	yrdC N6-threonylcarbamoyltransferase domain containing(YRDC)
LOC109060027	0.429355	-1.21976	0.00639719	0.151858	XP_011531398	XDH	xanthine dehydrogenase(XDH)
LOC109060187	0.257375	-1.95806	0.00142194	0.103421	NP_000187	HSD11B2	hydroxysteroid 11-beta dehydrogenase 2(HSD11B2)
LOC109060270	3.38398	1.75872	0.00252381	0.107656	NP_003230	TGFB3	transforming growth factor beta 3(TGFB3)
LOC109060553	2.99735	1.58369	0.00144795	0.103421	NP_065891	FNIP2	folliculin interacting protein 2(FNIP2)
LOC109060558	2.799	1.48491	0.00329942	0.118452	NP_932076	NME7	NME/NM23 family member 7(NME7)
LOC109060608	2.95811	1.56468	0.00267831	0.109581	NP_001454	FRZB	frizzled-related protein(FRZB)
LOC109060697	2.22529	1.15399	0.00681291	0.156486	XP_016876599	PACS2	phosphofurin acidic cluster sorting protein 2(PACS2)
LOC109060707	0.261648	-1.9343	0.00156517	0.103421	NP_001304994	RRM1	ribonucleotide reductase catalytic subunit M1(RRM1)
LOC109060852	0.323193	-1.62953	0.00159832	0.103421	NP_848600	TMEM26	transmembrane protein 26(TMEM26)
LOC109060982	0.0849227	-3.55771	0.00976775	0.184823	NP_001928	DPT	dermatopontin(DPT)
LOC109060998	2.84321	1.50752	0.0020397	0.107424	NP_001230806	TOB1	transducer of ERBB2, 1(TOB1)
LOC109061298	0.385153	-1.3765	0.00603321	0.146808	NP_741983	TRIM35	tripartite motif containing 35(TRIM35)
LOC109061448	3.38687	1.75995	0.00196318	0.107191	NP_055246	PALD1	phosphatase domain containing, paladin 1(PALD1)
LOC109061751	0.459953	-1.12044	0.00949811	0.182664	XP_005252887	SWAP70	SWAP switching B-cell complex 70kDa subunit(SWAP70)
LOC109061756	0.26952	-1.89153	0.0032701	0.118452	NP_001128360	RTL1	retrotransposon-like 1(RTL1)
LOC109061876	2.78538	1.47787	0.00425513	0.129995	NP_004419	EFNA1	ephrin A1(EFNA1)
LOC109061968	0.21326	-2.22932	0.000832027	0.103421	XP_011529851	CENPE	centromere protein E(CENPE)
LOC109061977	2.68456	1.42469	0.00329183	0.118452	NP_071738	GLIPR2	GLI pathogenesis related 2(GLIPR2)
LOC109061990	2.56541	1.35919	0.00371621	0.125093	-	-	-
LOC109061991	2.59704	1.37687	0.00366629	0.124813	NP_001229820	CSDE1	cold shock domain containing E1(CSDE1)
LOC109061992	3.88446	1.95771	0.000845742	0.103421	NP_009142	RASSF8	Ras association domain family member 8(RASSF8)
LOC109061993	2.7488	1.4588	0.00222418	0.107546	-	-	-
LOC109062037	0.283607	-1.81804	0.00195529	0.107191	NP_033720	AOC2	amine oxidase, copper containing 2(AOC2)
LOC109062119	0.411636	-1.28056	0.0051571	0.137883	NP_002254	KIFC1	kinesin family member C1(KIFC1)
LOC109062156	0.115704	-3.11149	0.00383994	0.127071	NP_689848	OIT3	oncoprotein induced transcript 3(OIT3)
LOC109062193	0.257691	-1.95628	0.00239388	0.107656	NP_004517	MCM2	minichromosome maintenance complex component 2(MCM2)
LOC109062323	3.72089	1.89565	0.00142976	0.103421	NP_001128711	LDHA	lactate dehydrogenase A(LDHA)
LOC109062325	4.47722	2.1626	0.00071886	0.103421	NP_001128711	LDHA	lactate dehydrogenase A(LDHA)
LOC109062348	2.81876	1.49506	0.0035086	0.122336	XP_006718312	PDE3B	phosphodiesterase 3B(PDE3B)
LOC109062389	0.341381	-1.55054	0.00267798	0.109581	NP_005021	PLK1	polo like kinase 1(PLK1)
LOC109062477	2.65409	1.40822	0.00458991	0.131677	NP_001006639	RAB37	RAB37, member RAS oncogene family(RAB37)
LOC109062488	0.436347	-1.19645	0.0078752	0.16616	XP_011508876	COL6A3	collagen type VI alpha 3 chain(COL6A3)
LOC109062719	2.35366	1.23491	0.0083288	0.171964	NP_001304698	STAP1	signal transducing adaptor family member 1(STAP1)
LOC109062725	2.76965	1.4697	0.00362421	0.123974	-	-	-
LOC109062732	4.11823	2.04203	0.0011152	0.103421	NP_001193940	CNTFR	ciliary neurotrophic factor receptor(CNTFR)
LOC109062842	0.358556	-1.47973	0.00370544	0.125093	NP_955445	PRC1	protein regulator of cytokinesis 1(PRC1)
LOC109062932	0.219558	-2.18733	0.000749514	0.103421	NP_002449	MUC5B	mucin 5B, oligomeric mucus/gel-forming(MUC5B)
LOC109062942	0.310248	-1.68851	0.001897	0.107191	NP_005021	PLK1	polo like kinase 1(PLK1)
LOC109062999	0.186215	-2.42496	0.000438801	0.103421	NP_002097	H2AFZ	H2A histone family member Z(H2AFZ)
LOC109063000	0.191019	-2.38821	0.000641828	0.103421	NP_002097	H2AFZ	H2A histone family member Z(H2AFZ)
LOC109063063	0.343983	-1.53959	0.00403722	0.128246	NP_001310233	AURKA	aurora kinase A(AURKA)
LOC109063064	2.51007	1.32773	0.00385284	0.127071	NP_001157903	ARHGAP40	Rho GTPase activating protein 40(ARHGAP40)
LOC109063196	3.20552	1.68056	0.00187653	0.107191	NP_001274355	UPP1	uridine phosphorylase 1(UPP1)
LOC109063217	0.431827	-1.21147	0.00614314	0.148111	NP_001376374	-	-
LOC109063240	3.41906	1.7736	0.00391313	0.127824	NP_001032416	PDE4B	phosphodiesterase 4B(PDE4B)
LOC109063242	2.94656	1.55903	0.00484941	0.13424	NP_001284370	PDE4B	phosphodiesterase 4B(PDE4B)
LOC109063350	0.39587	-1.3369	0.00396149	0.127824	XP_016869094	ARMC1	armadillo repeat containing 1(ARMC1)
LOC109063482	0.35468	-1.49541	0.00233729	0.107656	XP_011537327	ESPL1	extra spindle pole bodies like 1, separase(ESPL1)
LOC109063739	3.71407	1.893	0.00121	0.103421	NP_001193726	PKM	pyruvate kinase, muscle(PKM)
LOC109063801	5.18705	2.37492	0.000460772	0.103421	NP_071334	EGLN1	egl-9 family hypoxia inducible factor 1(EGLN1)
LOC109063819	2.90475	1.53841	0.00222471	0.107546	-	-	-
LOC109063993	0.314293	-1.66982	0.00157565	0.103421	NP_058634	EFEMP2	EGF containing fibulin like extracellular matrix protein 2(EFEMP2)
LOC109064011	2.43434	1.28353	0.00358075	0.123176	NP_001315594	ARHGAP29	Rho GTPase activating protein 29(ARHGAP29)
LOC109064021	0.384121	-1.38037	0.00965006	0.183865	XP_011534467	SH3BGRL2	SH3 domain binding glutamate rich protein like 2(SH3BGRL2)
LOC109064026	0.368608	-1.43984	0.0042909	0.129995	XP_005251040	PLEC	plectin(PLEC)
LOC109064028	0.471328	-1.0852	0.00956915	0.183173	NP_958782	PLEC	plectin(PLEC)
LOC109064029	0.381271	-1.39111	0.00441096	0.130434	NP_112598	EPPK1	epiplakin 1(EPPK1)
LOC109064031	0.414033	-1.27218	0.00671235	0.155452	XP_005251037	PLEC	plectin(PLEC)
LOC109064051	0.444965	-1.16823	0.00769559	0.164244	NP_000886	LTA4H	leukotriene A4 hydrolase(LTA4H)
LOC109064429	2.20134	1.13838	0.00818275	0.170315	NP_002078	GRN	granulin precursor(GRN)
LOC109064520	0.272701	-1.87461	0.00156529	0.103421	NP_001817	CKS1B	CDC28 protein kinase regulatory subunit 1B(CKS1B)
LOC109064692	0.267079	-1.90466	0.0013227	0.103421	XP_011507384	CENPF	centromere protein F(CENPF)
LOC109064747	2.83659	1.50416	0.00262359	0.109214	NP_001853	Cox5b	cytochrome c oxidase subunit 5B(COX5B)
LOC109064749	0.35028	-1.51342	0.00479488	0.134105	XP_011538562	CASP7	caspase 7(CASP7)
LOC109064864	4.21083	2.0741	0.00153748	0.103421	NP_997646	ARID5A	AT-rich interaction domain 5A(ARID5A)
LOC109064905	0.369299	-1.43714	0.00612922	0.147992	NP_002362	MAL	mal, T-cell differentiation protein(MAL)
LOC109065336	2.94969	1.56057	0.00222215	0.107546	NP_001252507	FAM13A	family with sequence similarity 13 member A(FAM13A)
LOC109065510	4.3089	2.10732	0.000670705	0.103421	NP_061130	ZNF395	zinc finger protein 395(ZNF395)
LOC109065546	7.90318	2.98243	0.000400011	0.103421	NP_001364190	-	-
LOC109065567	3.60911	1.85164	0.00124682	0.103421	NP_003575	DUSP11	dual specificity phosphatase 11(DUSP11)
LOC109065568	4.94408	2.3057	0.000588725	0.103421	NP_055982	JMJD6	arginine demethylase and lysine hydroxylase(JMJD6)
LOC109065685	2.34515	1.22968	0.00592032	0.145577	NP_001361433	-	-
LOC109065787	2.70089	1.43344	0.00393836	0.127824	NP_001760	CD9	CD9 molecule(CD9)
LOC109065879	2.11664	1.08178	0.00871806	0.175304	NP_976072	SLC23A2	solute carrier family 23 member 2(SLC23A2)
LOC109065899	0.254958	-1.97167	0.0029892	0.115379	-	-	-
LOC109065938	3.23816	1.69517	0.00228282	0.107656	NP_001165095	VEGFA	vascular endothelial growth factor A(VEGFA)
LOC109066076	2.48367	1.31247	0.00481911	0.13421	NP_001034241	RGS21	regulator of G-protein signaling 21(RGS21)
LOC109066081	0.276828	-1.85294	0.00134064	0.103421	XP_011543366	NUMA1	nuclear mitotic apparatus protein 1(NUMA1)
LOC109066155	2.30517	1.20487	0.00737242	0.162021	-	-	-
LOC109066312	0.22692	-2.13975	0.00117447	0.103421	NP_001159	BIRC5	baculoviral IAP repeat containing 5(BIRC5)
LOC109066425	2.52062	1.33378	0.00656578	0.154224	XP_011541345	barx2	BARX homeobox 2(BARX2)
LOC109066484	3.2108	1.68293	0.0014091	0.103421	NP_001273130	RERGL	RERG like(RERGL)
LOC109066488	0.265157	-1.91508	0.00123355	0.103421	NP_060606	ASPM	abnormal spindle microtubule assembly(ASPM)
LOC109066551	2.58075	1.36779	0.00354888	0.122593	NP_001265281	ACO1	aconitase 1(ACO1)
LOC109066566	0.350087	-1.51421	0.0033135	0.118452	NP_001276980	UHRF1	ubiquitin like with PHD and ring finger domains 1(UHRF1)
LOC109066726	0.310306	-1.68824	0.00308665	0.117207	NP_001305073	AQP3	aquaporin 3 (Gill blood group)(AQP3)
LOC109066728	0.414061	-1.27208	0.00426164	0.129995	NP_001274689	COL4A6	collagen type IV alpha 6 chain(COL4A6)
LOC109066994	3.15521	1.65774	0.00264221	0.109435	NP_055246	PALD1	phosphatase domain containing, paladin 1(PALD1)
LOC109067044	0.14241	-2.81188	0.000326187	0.103421	NP_998765	PLA2G4F	phospholipase A2 group IVF(PLA2G4F)
LOC109067100	2.49988	1.32186	0.00510106	0.137558	NP_064706	MNT	MAX network transcriptional repressor(MNT)
LOC109067131	3.87495	1.95418	0.0010688	0.103421	XP_016861612	NECTIN3	nectin cell adhesion molecule 3(NECTIN3)
LOC109067171	0.381212	-1.39133	0.00521363	0.138743	-	-	-
LOC109067172	0.42854	-1.2225	0.00521458	0.138743	XP_005255858	CSNK2A2	casein kinase 2 alpha 2(CSNK2A2)
LOC109067185	2.66958	1.41661	0.00335725	0.119487	NP_006832	SLC38A3	solute carrier family 38 member 3(SLC38A3)
LOC109067189	2.57722	1.36582	0.00454315	0.131677	NP_001127703	NT5DC2	5'-nucleotidase domain containing 2(NT5DC2)
LOC109067307	0.396572	-1.33435	0.0085195	0.173723	NP_001284534	TNFRSF14	TNF receptor superfamily member 14(TNFRSF14)
LOC109067382	2.57218	1.36299	0.00902934	0.177089	NP_004703	HGS	hepatocyte growth factor-regulated tyrosine kinase substrate(HGS)
LOC109067596	0.151712	-2.72059	0.000769769	0.103421	XP_011543842	POLA1	DNA polymerase alpha 1, catalytic subunit(POLA1)
LOC109067654	0.235128	-2.08848	0.00103461	0.103421	NP_689512	NCAPH2	non-SMC condensin II complex subunit H2(NCAPH2)
LOC109067674	2.52978	1.33901	0.00571767	0.145065	NP_001139809	AFAP1L1	actin filament associated protein 1 like 1(AFAP1L1)
LOC109067684	3.93112	1.97494	0.00120152	0.103421	NP_004558	PFKFB4	6-phosphofructo-2-kinase/fructose-2,6-biphosphatase 4(PFKFB4)
LOC109067760	2.34157	1.22748	0.00584372	0.145368	NP_001317074	RIC8B	RIC8 guanine nucleotide exchange factor B(RIC8B)
LOC109068058	10.5722	3.4022	0.000228117	0.103421	XP_006722133	FMNL1	formin like 1(FMNL1)
LOC109068063	2.9615	1.56633	0.00664809	0.155254	NP_001129	AGRP	agouti related neuropeptide(AGRP)
LOC109068098	0.451322	-1.14777	0.00871383	0.175304	XP_011542941	WRN	Werner syndrome RecQ like helicase(WRN)
LOC109068184	3.20823	1.68178	0.00128659	0.103421	NP_061881	MIEF1	mitochondrial elongation factor 1(MIEF1)
LOC109068406	0.293045	-1.77081	0.00226538	0.107546	XP_016882984	MUC16	mucin 16, cell surface associated(MUC16)
LOC109068461	0.214852	-2.21859	0.000720218	0.103421	-	-	-
LOC109068513	3.064	1.61541	0.00247923	0.107656	NP_001138870	TEF	TEF, PAR bZIP transcription factor(TEF)
LOC109068611	0.41482	-1.26944	0.00504034	0.136538	NP_004065	COX8A	cytochrome c oxidase subunit 8A(COX8A)
LOC109068636	3.13608	1.64896	0.00183406	0.107013	NP_006463	TXNIP	thioredoxin interacting protein(TXNIP)
LOC109068637	3.0379	1.60308	0.00318523	0.117207	NP_006463	TXNIP	thioredoxin interacting protein(TXNIP)
LOC109068640	0.201701	-2.30971	0.000848437	0.103421	NP_060571	CDCA8	cell division cycle associated 8(CDCA8)
LOC109068749	2.29476	1.19834	0.00657489	0.154224	NP_001069	VCAM1	vascular cell adhesion molecule 1(VCAM1)
LOC109068825	0.295211	-1.76018	0.0018483	0.107013	NP_690850	COL24A1	collagen type XXIV alpha 1 chain(COL24A1)
LOC109068840	2.79632	1.48353	0.00239386	0.107656	NP_004826	AGTR1	angiotensin II receptor type 1(AGTR1)
LOC109068950	5.70838	2.51308	0.0043179	0.129995	-	-	-
LOC109068960	0.326794	-1.61355	0.00712428	0.16038	NP_001365166	-	-
LOC109069152	0.32786	-1.60885	0.00221691	0.107546	NP_001243222	KRT8	keratin 8(KRT8)
LOC109069177	0.370933	-1.43077	0.00367537	0.124864	NP_001243222	KRT8	keratin 8(KRT8)
LOC109069267	5.22047	2.38418	0.00362655	0.123974	NP_001275679	TMPRSS5	transmembrane protease, serine 5(TMPRSS5)
LOC109069443	2.75627	1.46272	0.00314205	0.117207	NP_071334	EGLN1	egl-9 family hypoxia inducible factor 1(EGLN1)
LOC109069444	3.29568	1.72058	0.00158141	0.103421	-	-	-
LOC109069551	8.87275	3.14938	0.000205324	0.103421	NP_002094	GYS1	glycogen synthase 1(GYS1)
LOC109069897	2.09808	1.06907	0.0074071	0.162138	NP_001305847	GLIS2	GLIS family zinc finger 2(GLIS2)
LOC109069960	0.41474	-1.26972	0.00877088	0.17545	XP_016877437	NRG4	neuregulin 4(NRG4)
LOC109070211	2.5606	1.35648	0.0034146	0.120227	NP_001184249	MCL1	BCL2 family apoptosis regulator(MCL1)
LOC109070332	3.15936	1.65963	0.00177918	0.106382	NP_001356418	-	-
LOC109070340	2.81585	1.49357	0.00374459	0.125402	NP_056436	CCDC69	coiled-coil domain containing 69(CCDC69)
LOC109070451	2.83771	1.50473	0.0029857	0.115379	NP_001166243	IL34	interleukin 34(IL34)
LOC109070559	2.78235	1.4763	0.00247998	0.107656	XP_011519970	PDE8A	phosphodiesterase 8A(PDE8A)
LOC109070727	2.36617	1.24255	0.00947047	0.182345	XP_005260820	APMAP	adipocyte plasma membrane associated protein(APMAP)
LOC109070917	0.380384	-1.39447	0.00346722	0.12156	NP_775949	TCAF2	TRPM8 channel associated factor 2(TCAF2)
LOC109071041	0.266139	-1.90975	0.00139568	0.103421	NP_203698	CDK1	cyclin dependent kinase 1(CDK1)
LOC109071081	0.463546	-1.10922	0.00807717	0.168973	NP_006024	LIPG	lipase G, endothelial type(LIPG)
LOC109071085	0.348456	-1.52095	0.00214926	0.107546	XP_011530119	epgn	epithelial mitogen(EPGN)
LOC109071096	6.76258	2.75757	0.000325269	0.103421	NP_951009	MKNK2	MAP kinase interacting serine/threonine kinase 2(MKNK2)
LOC109071178	4.39449	2.1357	0.00128318	0.103421	NP_006682	LYVE1	lymphatic vessel endothelial hyaluronan receptor 1(LYVE1)
LOC109071260	2.72982	1.4488	0.00243015	0.107656	-	-	-
LOC109071308	8.50603	3.08849	0.000215957	0.103421	NP_006233	PPP1R3D	protein phosphatase 1 regulatory subunit 3D(PPP1R3D)
LOC109071347	2.74431	1.45644	0.00266168	0.109581	NP_055260	SERP1	stress associated endoplasmic reticulum protein 1(SERP1)
LOC109071498	0.404816	-1.30466	0.00595993	0.146049	NP_001919	CFD	complement factor D(CFD)
LOC109071555	0.283738	-1.81737	0.00124211	0.103421	-	-	-
LOC109071622	3.78898	1.92181	0.00135514	0.103421	NP_002323	LRP1	LDL receptor related protein 1(LRP1)
LOC109071689	0.402111	-1.31433	0.00791514	0.166644	NP_001265662	TAGAP	T-cell activation RhoGTPase activating protein(TAGAP)
LOC109072350	3.24861	1.69982	0.00590085	0.145577	XP_005247182	CPOX	coproporphyrinogen oxidase(CPOX)
LOC109072374	0.342027	-1.54782	0.00677912	0.156338	NP_001014446	OCIAD2	OCIA domain containing 2(OCIAD2)
LOC109072579	2.49752	1.3205	0.00564413	0.144584	NP_061881	MIEF1	mitochondrial elongation factor 1(MIEF1)
LOC109072647	2.15608	1.10841	0.00833519	0.171964	-	-	-
LOC109072724	2.55725	1.35459	0.00419976	0.128851	NP_004406	DSP	desmoplakin(DSP)
LOC109072795	2.21256	1.14572	0.00854315	0.173855	NP_003371	VIM	vimentin(VIM)
LOC109073000	2.22007	1.1506	0.00672196	0.155456	NP_001177693	TMEM238	transmembrane protein 238(TMEM238)
LOC109073016	3.06994	1.61821	0.00200945	0.107318	-	-	-
LOC109073131	2.44436	1.28946	0.0052829	0.139536	NP_055246	PALD1	phosphatase domain containing, paladin 1(PALD1)
LOC109073172	0.285827	-1.80679	0.00415305	0.128851	NP_004376	VCAN	versican(VCAN)
LOC109073280	0.38729	-1.36851	0.00491452	0.134682	NP_001186883	ACTG1	actin gamma 1(ACTG1)
LOC109073446	3.79675	1.92477	0.00237804	0.107656	NP_001276046	NMRK2	nicotinamide riboside kinase 2(NMRK2)
LOC109073447	4.18718	2.06598	0.00157963	0.103421	NP_001276046	NMRK2	nicotinamide riboside kinase 2(NMRK2)
LOC109073536	2.10313	1.07254	0.00903498	0.177089	NP_000026	ALDOB	aldolase, fructose-bisphosphate B(ALDOB)
LOC109073645	3.67753	1.87874	0.000822806	0.103421	NP_001139647	ZNF414	zinc finger protein 414(ZNF414)
LOC109073668	0.31825	-1.65177	0.00182507	0.107013	XP_006712451	NCAPH	non-SMC condensin I complex subunit H(NCAPH)
LOC109073755	2.91307	1.54254	0.00319383	0.117207	XP_016863301	RASGEF1B	RasGEF domain family member 1B(RASGEF1B)
LOC109073985	2.48694	1.31437	0.00382164	0.127071	XP_011511531	B3GNT5	UDP-GlcNAc:betaGal beta-1,3-N-acetylglucosaminyltransferase 5(B3GNT5)
LOC109073986	2.31086	1.20843	0.00491097	0.134682	NP_001958	EIF4A2	eukaryotic translation initiation factor 4A2(EIF4A2)
LOC109074026	2.30014	1.20172	0.00985775	0.185848	NP_001307660	ZBTB21	zinc finger and BTB domain containing 21(ZBTB21)
LOC109074046	2.40747	1.26752	0.0067081	0.155452	NP_036401	hyal4	hyaluronoglucosaminidase 4(HYAL4)
LOC109074213	5.54877	2.47217	0.000481386	0.103421	NP_000211	KCNJ1	potassium voltage-gated channel subfamily J member 1(KCNJ1)
LOC109074219	5.0797	2.34474	0.000535541	0.103421	NP_000211	KCNJ1	potassium voltage-gated channel subfamily J member 1(KCNJ1)
LOC109074305	0.408659	-1.29103	0.00621882	0.149279	NP_149020	CCNB3	cyclin B3(CCNB3)
LOC109074415	4.7247	2.24022	0.000609404	0.103421	-	-	-
LOC109074424	0.437324	-1.19322	0.00653976	0.153839	NP_741983	TRIM35	tripartite motif containing 35(TRIM35)
LOC109074443	0.15383	-2.70059	0.000345663	0.103421	NP_998765	PLA2G4F	phospholipase A2 group IVF(PLA2G4F)
LOC109074483	0.0619994	-4.0116	0.000190222	0.103421	NP_998765	PLA2G4F	phospholipase A2 group IVF(PLA2G4F)
LOC109074525	2.89808	1.5351	0.00349809	0.122336	NP_444274	EGLN2	egl-9 family hypoxia inducible factor 2(EGLN2)
LOC109074527	2.63548	1.39807	0.00453492	0.131677	NP_005338	HSPA5	heat shock protein family A (Hsp70) member 5(HSPA5)
LOC109074606	2.08907	1.06286	0.0093677	0.181215	NP_006829	METAP2	methionyl aminopeptidase 2(METAP2)
LOC109074621	0.238883	-2.06562	0.000877019	0.103421	NP_000779	DCK	deoxycytidine kinase(DCK)
LOC109074643	2.38701	1.2552	0.00464612	0.131718	NP_037369	PRELID1	PRELI domain containing 1(PRELID1)
LOC109074830	2.14699	1.10231	0.00722127	0.160676	NP_002458	MYC	v-myc avian myelocytomatosis viral oncogene homolog(MYC)
LOC109074831	3.38441	1.75891	0.00161129	0.103421	NP_002458	MYC	v-myc avian myelocytomatosis viral oncogene homolog(MYC)
LOC109074833	2.6267	1.39325	0.00858409	0.174257	NP_473368	ANKH	ANKH inorganic pyrophosphate transport regulator(ANKH)
LOC109075216	0.332524	-1.58847	0.00196256	0.107191	XP_011530119	epgn	epithelial mitogen(EPGN)
LOC109075458	0.436406	-1.19626	0.00665817	0.155254	-	-	-
LOC109075523	3.22715	1.69026	0.00603659	0.146808	NP_002023	FTH1	ferritin heavy chain 1(FTH1)
LOC109075524	5.55512	2.47382	0.00872095	0.175304	NP_002023	FTH1	ferritin heavy chain 1(FTH1)
LOC109075554	2.16207	1.11241	0.00850234	0.17367	XP_016857275	ASH1L	ASH1 like histone lysine methyltransferase(ASH1L)
LOC109075558	3.84636	1.94349	0.00147335	0.103421	XP_005245394	ASH1L	ASH1 like histone lysine methyltransferase(ASH1L)
LOC109075562	4.40963	2.14066	0.000770151	0.103421	XP_016857275	ASH1L	ASH1 like histone lysine methyltransferase(ASH1L)
LOC109075640	4.68718	2.22872	0.00143817	0.103421	-	-	-
LOC109075664	3.07703	1.62154	0.0017082	0.105283	NP_001257952	ATRIP	ATR interacting protein(ATRIP)
LOC109075719	2.13251	1.09255	0.00852609	0.173723	NP_001375327	-	-
LOC109075807	0.39134	-1.3535	0.00416571	0.128851	NP_689511	NASP	nuclear autoantigenic sperm protein(NASP)
LOC109075866	2.43027	1.28112	0.00386399	0.127071	NP_065953	CAMSAP3	calmodulin regulated spectrin associated protein family member 3(CAMSAP3)
LOC109075951	4.64844	2.21675	0.00899795	0.177089	XP_011525329	PLAUR	plasminogen activator, urokinase receptor(PLAUR)
LOC109076128	56.7412	5.82633	9.69e-05	0.103421	NP_001353	DIO3	deiodinase, iodothyronine type III(DIO3)
LOC109076300	0.399221	-1.32474	0.00322727	0.117403	XP_024304700	-	-
LOC109076538	0.415756	-1.26619	0.00435504	0.129995	NP_001005337	pkp1	plakophilin 1(PKP1)
LOC109076620	2.17521	1.12116	0.00758979	0.163472	NP_976030	NECTIN1	nectin cell adhesion molecule 1(NECTIN1)
LOC109076645	0.443041	-1.17449	0.00889845	0.176925	NP_006293	MOGS	mannosyl-oligosaccharide glucosidase(MOGS)
LOC109077035	0.324183	-1.62512	0.0069091	0.157225	NP_722576	ADGRG4	adhesion G protein-coupled receptor G4(ADGRG4)
LOC109077054	6.66089	2.73572	0.000442475	0.103421	NP_000435	PHEX	phosphate regulating endopeptidase homolog, X-linked(PHEX)
LOC109077148	4.36735	2.12676	0.000666685	0.103421	NP_001287894	CSRP2	cysteine and glycine rich protein 2(CSRP2)
LOC109077151	5.1483	2.3641	0.000581344	0.103421	XP_011527961	TMPRSS15	transmembrane protease, serine 15(TMPRSS15)
LOC109077159	5.85544	2.54978	0.000445253	0.103421	NP_001287894	CSRP2	cysteine and glycine rich protein 2(CSRP2)
LOC109077313	3.37485	1.75482	0.00121668	0.103421	NP_001166290	PGM1	phosphoglucomutase 1(PGM1)
LOC109077505	4.48952	2.16656	0.000716499	0.103421	NP_001093122	GPR137C	G protein-coupled receptor 137C(GPR137C)
LOC109077541	3.03817	1.6032	0.00239245	0.107656	NP_001309996	PFKP	phosphofructokinase, platelet(PFKP)
LOC109077572	0.464598	-1.10595	0.00717733	0.160567	NP_006639	WNK2	WNK lysine deficient protein kinase 2(WNK2)
LOC109077984	0.14321	-2.8038	0.000463726	0.103421	NP_001258094	PTGS1	prostaglandin-endoperoxide synthase 1(PTGS1)
LOC109077996	4.4141	2.14212	0.000780321	0.103421	NP_005295	FFAR3	free fatty acid receptor 3(FFAR3)
LOC109077998	3.06568	1.61621	0.00193476	0.107191	NP_005295	FFAR3	free fatty acid receptor 3(FFAR3)
LOC109078178	11.2798	3.49567	0.000445227	0.103421	NP_061931	DDIT4	DNA damage inducible transcript 4(DDIT4)
LOC109078181	0.199333	-2.32675	0.00135264	0.103421	NP_057427	CENPF	centromere protein F(CENPF)
LOC109078439	0.139052	-2.84631	0.00107007	0.103421	NP_055851	ENDOD1	endonuclease domain containing 1(ENDOD1)
LOC109078605	0.15608	-2.67964	0.000334599	0.103421	NP_005554	STMN1	stathmin 1(STMN1)
LOC109078700	2.2945	1.19818	0.00660357	0.154529	NP_001026884	INF2	inverted formin, FH2 and WH2 domain containing(INF2)
LOC109078753	10.9139	3.44809	0.00026723	0.103421	XP_016869644	LOC105379356	uncharacterized LOC105379356(LOC105379356)
LOC109078790	0.31185	-1.68108	0.00210921	0.107546	NP_036244	TPX2	TPX2, microtubule nucleation factor(TPX2)
LOC109079176	2.23225	1.1585	0.00798424	0.167455	NP_001274355	UPP1	uridine phosphorylase 1(UPP1)
LOC109079199	0.224111	-2.15772	0.000904598	0.103421	NP_006222	POLE	DNA polymerase epsilon, catalytic subunit(POLE)
LOC109079204	3.2081	1.68172	0.0015238	0.103421	NP_001165094	VEGFA	vascular endothelial growth factor A(VEGFA)
LOC109079839	2.53758	1.34345	0.00383139	0.127071	NP_060401	TTC38	tetratricopeptide repeat domain 38(TTC38)
LOC109079848	2.85009	1.51101	0.00243873	0.107656	NP_001161792	TSPAN9	tetraspanin 9(TSPAN9)
LOC109079850	0.286993	-1.80091	0.00914652	0.17883	NP_001310434	OSMR	oncostatin M receptor(OSMR)
LOC109079949	60.9636	5.92988	0.000383117	0.103421	XP_011538562	CASP7	caspase 7(CASP7)
LOC109079961	0.384123	-1.38036	0.00330977	0.118452	NP_004334	CALR	calreticulin(CALR)
LOC109080095	2.59496	1.37571	0.00751368	0.162777	NP_002023	FTH1	ferritin heavy chain 1(FTH1)
LOC109080134	0.362377	-1.46444	0.00255237	0.107656	NP_001375112	-	-
LOC109080251	2.33506	1.22346	0.00483871	0.13421	NP_055982	JMJD6	arginine demethylase and lysine hydroxylase(JMJD6)
LOC109080376	0.363815	-1.45872	0.00226956	0.107546	NP_001243495	f2rl2	coagulation factor II thrombin receptor like 2(F2RL2)
LOC109080386	0.242796	-2.04219	0.00146062	0.103421	NP_114172	CCNB1	cyclin B1(CCNB1)
LOC109080452	24.9109	4.6387	0.000318587	0.103421	NP_001172030	CD22	CD22 molecule(CD22)
LOC109080567	0.468819	-1.0929	0.00773027	0.164244	NP_000173	HADHA	hydroxyacyl-CoA dehydrogenase/3-ketoacyl-CoA thiolase/enoyl-CoA hydratase (trifunctional protein), alpha subunit(HADHA)
LOC109080610	0.469591	-1.09052	0.00930002	0.180509	XP_006721361	NLRC5	NLR family CARD domain containing 5(NLRC5)
LOC109080634	4.12397	2.04403	0.000981651	0.103421	NP_003460	SCG2	secretogranin II(SCG2)
LOC109080636	4.0007	2.00025	0.00162274	0.103421	NP_542402	KCNE4	potassium voltage-gated channel subfamily E regulatory subunit 4(KCNE4)
LOC109080764	0.477564	-1.06623	0.00875809	0.175407	NP_001358152	-	-
LOC109080771	3.04422	1.60607	0.00214012	0.107546	XP_016855574	TXNIP	thioredoxin interacting protein(TXNIP)
LOC109080784	4.68556	2.22822	0.0011417	0.103421	NP_002764	PRSS8	protease, serine 8(PRSS8)
LOC109080902	3.80956	1.92963	0.000873363	0.103421	NP_001243331	ELOVL1	ELOVL fatty acid elongase 1(ELOVL1)
LOC109080922	0.412461	-1.27767	0.00403461	0.128246	XP_016872155	PLEKHS1	pleckstrin homology domain containing S1(PLEKHS1)
LOC109081010	0.354477	-1.49624	0.00225019	0.107546	NP_001804	CENPE	centromere protein E(CENPE)
LOC109081014	0.190219	-2.39427	0.000693675	0.103421	NP_006466	POSTN	periostin(POSTN)
LOC109081015	0.163207	-2.61522	0.000307146	0.103421	NP_001317446	POSTN	periostin(POSTN)
LOC109081048	0.308526	-1.69654	0.00207195	0.107474	NP_001246	CDC20	cell division cycle 20(CDC20)
LOC109081073	0.36522	-1.45316	0.00308346	0.117207	NP_001192244	STEAP4	STEAP4 metalloreductase(STEAP4)
LOC109081278	0.293567	-1.76824	0.00115732	0.103421	NP_001124295	DNMT1	DNA methyltransferase 1(DNMT1)
LOC109081358	2.95343	1.56239	0.00254229	0.107656	NP_004386	DBN1	drebrin 1(DBN1)
LOC109081590	0.340536	-1.55412	0.00289872	0.113485	NP_001307968	GPSM2	G-protein signaling modulator 2(GPSM2)
LOC109081625	0.476419	-1.0697	0.00772037	0.164244	NP_001036128	PLEKHG5	pleckstrin homology and RhoGEF domain containing G5(PLEKHG5)
LOC109081721	9.01326	3.17205	0.00195906	0.107191	NP_003774	B3GALT2	beta-1,3-galactosyltransferase 2(B3GALT2)
LOC109081867	0.303987	-1.71792	0.00211677	0.107546	NP_150628	KNSTRN	kinetochore localized astrin/SPAG5 binding protein(KNSTRN)
LOC109081971	2.80111	1.486	0.00484016	0.13421	NP_001269261	TSEN34	tRNA splicing endonuclease subunit 34(TSEN34)
LOC109081993	3.14083	1.65115	0.00305287	0.11647	NP_000256	NCF1	neutrophil cytosolic factor 1(NCF1)
LOC109082105	2.77059	1.4702	0.00353399	0.122336	NP_054778	RGCC	regulator of cell cycle(RGCC)
LOC109082227	2.4571	1.29695	0.00419325	0.128851	NP_005233	F2RL1	F2R like trypsin receptor 1(F2RL1)
LOC109082288	0.0412287	-4.60021	0.000192151	0.103421	NP_002429	MRC1	mannose receptor, C type 1(MRC1)
LOC109082370	2.88629	1.52921	0.00353125	0.122336	NP_001792	CDO1	cysteine dioxygenase type 1(CDO1)
LOC109082382	11.005	3.46009	0.000202568	0.103421	NP_001018011	ZBTB16	zinc finger and BTB domain containing 16(ZBTB16)
LOC109082463	0.393861	-1.34424	0.00738026	0.162021	NP_004307	ASCL1	achaete-scute family bHLH transcription factor 1(ASCL1)
LOC109082621	0.375025	-1.41494	0.0024641	0.107656	NP_002766	HTRA1	HtrA serine peptidase 1(HTRA1)
LOC109082736	2.53962	1.34461	0.004041	0.128246	NP_443094	RCSD1	RCSD domain containing 1(RCSD1)
LOC109082809	0.322038	-1.6347	0.00187751	0.107191	NP_002254	KIFC1	kinesin family member C1(KIFC1)
LOC109082858	3.84983	1.94479	0.000871406	0.103421	NP_444274	EGLN2	egl-9 family hypoxia inducible factor 2(EGLN2)
LOC109083134	6.35642	2.66821	0.000296271	0.103421	NP_113600	GABARAPL1	GABA type A receptor associated protein like 1(GABARAPL1)
LOC109083156	2.37743	1.2494	0.00457647	0.131677	NP_067028	RHOU	ras homolog family member U(RHOU)
LOC109083181	0.423315	-1.2402	0.00514639	0.137821	XP_006712859	CASP10	caspase 10(CASP10)
LOC109083342	2.42507	1.27803	0.0078422	0.165958	NP_001272808	CEBPB	CCAAT/enhancer binding protein beta(CEBPB)
LOC109083639	2.17982	1.12421	0.00753794	0.163087	NP_001958	EIF4A2	eukaryotic translation initiation factor 4A2(EIF4A2)
LOC109083744	2.72603	1.4468	0.0024029	0.107656	NP_001289979	MAPRE3	microtubule associated protein RP/EB family member 3(MAPRE3)
LOC109083832	0.456657	-1.13082	0.00686267	0.156726	NP_000248	MYH7	myosin heavy chain 7(MYH7)
LOC109083851	0.415704	-1.26637	0.00747644	0.162777	NP_001017920	DAPL1	death associated protein like 1(DAPL1)
LOC109083855	0.431025	-1.21416	0.00861727	0.1745	NP_000490	CYP1A1	cytochrome P450 family 1 subfamily A member 1(CYP1A1)
LOC109083960	0.401603	-1.31616	0.00456599	0.131677	-	-	-
LOC109084013	12.0723	3.59362	0.000774745	0.103421	NP_005321	HBE1	hemoglobin subunit epsilon 1(HBE1)
LOC109084074	6.38008	2.67357	0.000323431	0.103421	NP_063938	CYP26B1	cytochrome P450 family 26 subfamily B member 1(CYP26B1)
LOC109084248	5.94788	2.57238	0.000417198	0.103421	NP_002169	IGFBP6	insulin like growth factor binding protein 6(IGFBP6)
LOC109084538	4.98673	2.31809	0.00170444	0.105283	NP_005518	HSPA1L	heat shock protein family A (Hsp70) member 1 like(HSPA1L)
LOC109084699	0.34106	-1.5519	0.00431895	0.129995	NP_001337918	-	-
LOC109084713	17.0784	4.09411	0.000415736	0.103421	NP_001193880	SLC16A3	solute carrier family 16 member 3(SLC16A3)
LOC109084790	2.33685	1.22457	0.00646755	0.152796	-	-	-
LOC109085018	0.168825	-2.5664	0.00048819	0.103421	NP_004063	CMKLR1	chemerin chemokine-like receptor 1(CMKLR1)
LOC109085042	3.9751	1.99099	0.00120329	0.103421	NP_001316730	PLEKHG1	pleckstrin homology and RhoGEF domain containing G1(PLEKHG1)
LOC109085360	0.320516	-1.64153	0.00193635	0.107191	NP_004514	KIF11	kinesin family member 11(KIF11)
LOC109085362	0.417746	-1.2593	0.00720472	0.160652	NP_060890	SLC22A15	solute carrier family 22 member 15(SLC22A15)
LOC109085398	0.41071	-1.28381	0.00459635	0.131677	XP_024308525	-	-
LOC109085407	2.40234	1.26444	0.00788205	0.16616	NP_001290193	TSC22D2	TSC22 domain family member 2(TSC22D2)
LOC109085423	2.22122	1.15135	0.00673328	0.155499	NP_006382	IPO7	importin 7(IPO7)
LOC109085479	26.6014	4.73343	0.000127664	0.103421	XP_006722132	FMNL1	formin like 1(FMNL1)
LOC109085566	3.16784	1.6635	0.00225347	0.107546	NP_001106678	TSTD1	thiosulfate sulfurtransferase like domain containing 1(TSTD1)
LOC109085595	0.377384	-1.40589	0.00889443	0.176925	-	-	-
LOC109085757	5.54808	2.47199	0.000481288	0.103421	-	-	-
LOC109085758	5.87128	2.55368	0.000870414	0.103421	-	-	-
LOC109085797	6.1039	2.60973	0.000635808	0.103421	XP_005247182	CPOX	coproporphyrinogen oxidase(CPOX)
LOC109085862	0.381343	-1.39084	0.0059318	0.145577	XP_016860894	SNX17	sorting nexin 17(SNX17)
LOC109085896	0.303509	-1.72019	0.00161826	0.103421	-	-	-
LOC109085985	0.314902	-1.66702	0.00267904	0.109581	XP_016883487	CDH26	cadherin 26(CDH26)
LOC109086351	4.08412	2.03003	0.000906507	0.103421	NP_060796	GIMAP4	GTPase, IMAP family member 4(GIMAP4)
LOC109086677	4.27326	2.09534	0.000692737	0.103421	NP_000282	PGK1	phosphoglycerate kinase 1(PGK1)
LOC109086787	2.06341	1.04503	0.00984591	0.185848	NP_001184152	PDE4D	phosphodiesterase 4D(PDE4D)
LOC109087167	0.376103	-1.4108	0.00382781	0.127071	NP_002499	NID1	nidogen 1(NID1)
LOC109087270	0.305626	-1.71016	0.00175645	0.106181	-	-	-
LOC109087295	0.271383	-1.8816	0.00145848	0.103421	NP_004258	CHST2	carbohydrate sulfotransferase 2(CHST2)
LOC109087658	0.368802	-1.43908	0.00972592	0.184823	NP_000413	krt17	keratin 17(KRT17)
LOC109087668	0.358023	-1.48187	0.00466044	0.131896	NP_000413	krt17	keratin 17(KRT17)
LOC109087743	0.0899746	-3.47434	0.00536746	0.140986	-	-	-
LOC109087778	10.774	3.42949	0.0005806	0.103421	NP_001373220	-	-
LOC109087821	0.268726	-1.89579	0.00150817	0.103421	NP_000121	F5	coagulation factor V(F5)
LOC109087893	0.465003	-1.10469	0.0074965	0.162777	-	-	-
LOC109087939	2.24781	1.16852	0.0060249	0.146808	NP_003113	SPINK1	serine peptidase inhibitor, Kazal type 1(SPINK1)
LOC109087962	0.215489	-2.21432	0.00081547	0.103421	XP_016858491	FAM20B	FAM20B, glycosaminoglycan xylosylkinase(FAM20B)
LOC109087982	0.242101	-2.04632	0.00528682	0.139536	-	-	-
LOC109088004	2.89381	1.53297	0.00411018	0.128851	NP_057269	HN1	hematological and neurological expressed 1(HN1)
LOC109088199	2.89177	1.53195	0.00377885	0.126292	NP_443202	HSPA12B	heat shock protein family A (Hsp70) member 12B(HSPA12B)
LOC109088255	5.63917	2.49548	0.000517558	0.103421	NP_444272	HTRA3	HtrA serine peptidase 3(HTRA3)
LOC109088347	6.2414	2.64187	0.000477212	0.103421	NP_001307130	METTL18	methyltransferase like 18(METTL18)
LOC109088762	2.29914	1.2011	0.00649284	0.153173	NP_008877	SPTBN2	spectrin beta, non-erythrocytic 2(SPTBN2)
LOC109088789	7.68416	2.94189	0.000414353	0.103421	-	-	-
LOC109088801	0.447314	-1.16064	0.00641294	0.151942	NP_001074419	MYO1C	myosin IC(MYO1C)
LOC109089433	0.423791	-1.23858	0.00874998	0.175407	XP_011526096	ADGRE1	adhesion G protein-coupled receptor E1(ADGRE1)
LOC109089434	0.362021	-1.46585	0.004624	0.131677	XP_016866894	RIPK1	receptor interacting serine/threonine kinase 1(RIPK1)
LOC109090042	0.22186	-2.17228	0.00131532	0.103421	NP_001009954	-	-
LOC109090345	3.09878	1.6317	0.00716049	0.160409	NP_061857	SSH1	slingshot protein phosphatase 1(SSH1)
LOC109090406	3.74319	1.90427	0.00163533	0.103422	NP_001135858	PDK3	pyruvate dehydrogenase kinase 3(PDK3)
LOC109090452	3.13662	1.64921	0.00301529	0.115754	NP_065202	ABO	ABO blood group (transferase A, alpha 1-3-N-acetylgalactosaminyltransferase; transferase B, alpha 1-3-galactosyltransferase)(ABO)
LOC109090485	0.182975	-2.45028	0.000742488	0.103421	NP_000843	GSTP1	glutathione S-transferase pi 1(GSTP1)
LOC109090568	0.37901	-1.39969	0.00903077	0.177089	NP_001186652	CRABP2	cellular retinoic acid binding protein 2(CRABP2)
LOC109090573	0.372058	-1.4264	0.00894249	0.177089	NP_003003	SFRP1	secreted frizzled related protein 1(SFRP1)
LOC109090787	2.73867	1.45347	0.00415641	0.128851	NP_001287664	RASGEF1B	RasGEF domain family member 1B(RASGEF1B)
LOC109090850	3.48172	1.7998	0.00119082	0.103421	NP_002023	FTH1	ferritin heavy chain 1(FTH1)
LOC109090931	3.48018	1.79916	0.00140439	0.103421	NP_002594	PDE7A	phosphodiesterase 7A(PDE7A)
LOC109091114	0.305192	-1.71221	0.00184573	0.107013	NP_031391	PADI2	peptidyl arginine deiminase 2(PADI2)
LOC109091138	2.30806	1.20668	0.00591298	0.145577	NP_001719	BSG	basigin (Ok blood group)(BSG)
LOC109091165	0.370254	-1.43341	0.00256175	0.107656	NP_001289958	PKP3	plakophilin 3(PKP3)
LOC109091236	0.319904	-1.64429	0.00452207	0.131677	NP_001264198	OTOG	otogelin(OTOG)
LOC109091237	0.364249	-1.457	0.00627644	0.150223	NP_068813	ST14	suppression of tumorigenicity 14(ST14)
LOC109091293	0.408649	-1.29107	0.0043417	0.129995	NP_064587	NIT2	nitrilase family member 2(NIT2)
LOC109091325	2.30283	1.20341	0.00666603	0.155254	NP_001265281	ACO1	aconitase 1(ACO1)
LOC109091457	0.408488	-1.29163	0.00498226	0.13578	NP_001317119	hmga2	high mobility group AT-hook 2(HMGA2)
LOC109091632	2.80027	1.48556	0.00239867	0.107656	-	-	-
LOC109091724	0.412832	-1.27637	0.00461104	0.131677	NP_001357188	-	-
LOC109091780	0.201513	-2.31105	0.00177652	0.106382	-	-	-
LOC109091878	0.262169	-1.93143	0.00181756	0.107013	-	-	-
LOC109091879	0.155123	-2.68851	0.00201229	0.107318	NP_563578	PTPRC	protein tyrosine phosphatase, receptor type C(PTPRC)
LOC109092101	0.419508	-1.25323	0.00577189	0.145065	NP_612444	FAM83F	family with sequence similarity 83 member F(FAM83F)
LOC109092119	2.17791	1.12295	0.00743101	0.162268	NP_001273295	MAP7D1	MAP7 domain containing 1(MAP7D1)
LOC109092579	0.366909	-1.4465	0.00453804	0.131677	XP_011510614	SMC4	structural maintenance of chromosomes 4(SMC4)
LOC109092582	0.38814	-1.36535	0.00637113	0.151607	XP_011510613	SMC4	structural maintenance of chromosomes 4(SMC4)
LOC109092890	2.3132	1.20989	0.0050564	0.136747	NP_060662	P3H2	prolyl 3-hydroxylase 2(P3H2)
LOC109092892	8.06586	3.01183	0.000533487	0.103421	NP_001375232	-	-
LOC109092919	0.330226	-1.59847	0.00316461	0.117207	NP_149020	CCNB3	cyclin B3(CCNB3)
LOC109092976	4.44339	2.15166	0.00110275	0.103421	XP_011510521	HDAC4	histone deacetylase 4(HDAC4)
LOC109093040	0.15667	-2.6742	0.00408466	0.128851	XP_006722082	ENGASE	endo-beta-N-acetylglucosaminidase(ENGASE)
LOC109093041	0.143355	-2.80234	0.000682492	0.103421	-	-	-
LOC109093071	2.24705	1.16803	0.00555202	0.143091	-	-	-
LOC109093090	0.324895	-1.62195	0.00480374	0.134105	NP_001245359	C20orf27	chromosome 20 open reading frame 27(C20orf27)
LOC109093091	3.99418	1.9979	0.00148274	0.103421	NP_001197	KLF9	Kruppel like factor 9(KLF9)
LOC109093180	2.66916	1.41639	0.00281213	0.111877	NP_116324	MT4	metallothionein 4(MT4)
LOC109093233	0.390667	-1.35599	0.0054301	0.141725	NP_071741	NCAPG	non-SMC condensin I complex subunit G(NCAPG)
LOC109093266	2.17336	1.11993	0.00813921	0.16968	NP_000261	PNP	purine nucleoside phosphorylase(PNP)
LOC109093287	0.392062	-1.35085	0.00573995	0.145065	XP_016865776	RAET1E	retinoic acid early transcript 1E(RAET1E)
LOC109093329	2.2876	1.19384	0.00951387	0.182753	NP_001317388	ATL2	atlastin GTPase 2(ATL2)
LOC109093372	0.378361	-1.40217	0.00580143	0.145065	XP_011533587	scel	sciellin(SCEL)
LOC109093381	2.91486	1.54343	0.00198235	0.107223	XP_016868732	DENND3	DENN domain containing 3(DENND3)
LOC109093691	3.60741	1.85096	0.00203446	0.107424	NP_061008	ERMAP	erythroblast membrane associated protein (Scianna blood group)(ERMAP)
LOC109093710	2.65576	1.40913	0.00339836	0.119913	NP_001987	FBLN1	fibulin 1(FBLN1)
LOC109093770	3.12082	1.64192	0.00270535	0.110109	NP_005156	ALDOC	aldolase, fructose-bisphosphate C(ALDOC)
LOC109093852	4.29064	2.10119	0.000615927	0.103421	NP_000913	PDE3B	phosphodiesterase 3B(PDE3B)
LOC109093886	0.21771	-2.19952	0.00259141	0.108424	NP_001306118	PLAT	plasminogen activator, tissue type(PLAT)
LOC109094036	2.51695	1.33168	0.0076277	0.163737	NP_067076	TRIM39	tripartite motif containing 39(TRIM39)
LOC109094066	0.324805	-1.62236	0.00190941	0.107191	NP_038479	MYOF	myoferlin(MYOF)
LOC109094237	0.264598	-1.91813	0.00187389	0.107191	NP_001291290	CKAP2L	cytoskeleton associated protein 2 like(CKAP2L)
LOC109094259	0.270217	-1.88781	0.00206032	0.107474	NP_955445	PRC1	protein regulator of cytokinesis 1(PRC1)
LOC109094294	3.78851	1.92163	0.00109349	0.103421	NP_000913	PDE3B	phosphodiesterase 3B(PDE3B)
LOC109094296	4.91591	2.29746	0.000519673	0.103421	NP_001364143	-	-
LOC109094505	3.42244	1.77502	0.00398715	0.127824	NP_003740	IRS2	insulin receptor substrate 2(IRS2)
LOC109094520	2.66289	1.41299	0.00243571	0.107656	-	-	-
LOC109094578	0.452742	-1.14324	0.00779342	0.165138	NP_001269555	LMNA	lamin A/C(LMNA)
LOC109094637	0.37519	-1.41431	0.00996299	0.186797	NP_919337	STX2	syntaxin 2(STX2)
LOC109094734	3.42029	1.77412	0.00170957	0.105283	XP_016882490	psg4	pregnancy specific beta-1-glycoprotein 4(PSG4)
LOC109094818	0.326663	-1.61412	0.00251663	0.107656	NP_001310878	MBD1	methyl-CpG binding domain protein 1(MBD1)
LOC109094861	3.45092	1.78698	0.00154198	0.103421	-	-	-
LOC109095079	2.43477	1.28379	0.00395825	0.127824	NP_644812	PPTC7	PTC7 protein phosphatase homolog(PPTC7)
LOC109095203	0.413152	-1.27526	0.00434081	0.129995	NP_000578	C7	complement C7(C7)
LOC109095292	2.72959	1.44869	0.00251463	0.107656	NP_542188	SAMD10	sterile alpha motif domain containing 10(SAMD10)
LOC109095306	3.15777	1.65891	0.00213535	0.107546	-	-	-
LOC109095611	0.395548	-1.33807	0.00758664	0.163472	-	-	-
LOC109095788	0.293915	-1.76653	0.00566528	0.144649	NP_001493	GP2	glycoprotein 2(GP2)
LOC109096107	0.478451	-1.06356	0.00920492	0.179545	NP_059119	GALNT7	polypeptide N-acetylgalactosaminyltransferase 7(GALNT7)
LOC109096386	5.77849	2.53069	0.000647684	0.103421	XP_011510532	HDAC4	histone deacetylase 4(HDAC4)
LOC109096423	4.70198	2.23327	0.000746203	0.103421	XP_011510521	HDAC4	histone deacetylase 4(HDAC4)
LOC109096498	0.260558	-1.94032	0.000985249	0.103421	NP_004258	CHST2	carbohydrate sulfotransferase 2(CHST2)
LOC109096591	2.12805	1.08953	0.0068461	0.156565	NP_001004720	NCK2	NCK adaptor protein 2(NCK2)
LOC109096621	3.40336	1.76696	0.00116959	0.103421	XP_024303908	-	-
LOC109096676	2.6935	1.42948	0.00332595	0.11863	NP_006013	TSC22D1	TSC22 domain family member 1(TSC22D1)
LOC109096740	0.464775	-1.10539	0.00953994	0.183001	XP_011533216	WDFY2	WD repeat and FYVE domain containing 2(WDFY2)
LOC109096751	0.248114	-2.01093	0.00104362	0.103421	NP_001307950	UBA52	ubiquitin A-52 residue ribosomal protein fusion product 1(UBA52)
LOC109096765	8.65064	3.11281	0.000670103	0.103421	NP_009046	TNFAIP6	TNF alpha induced protein 6(TNFAIP6)
LOC109096939	5.44439	2.44477	0.000791089	0.103421	-	-	-
LOC109097019	2.79206	1.48133	0.00234975	0.107656	NP_001230106	ALDOA	aldolase, fructose-bisphosphate A(ALDOA)
LOC109097302	4.50918	2.17286	0.000727901	0.103421	NP_004322	BNIP3L	BCL2 interacting protein 3 like(BNIP3L)
LOC109097356	2.3083	1.20683	0.00566205	0.144649	-	-	-
LOC109097546	0.380455	-1.3942	0.004529	0.131677	XP_011510141	SCRN3	secernin 3(SCRN3)
LOC109097653	0.388125	-1.36541	0.00511779	0.137558	NP_004233	HMGN3	high mobility group nucleosomal binding domain 3(HMGN3)
LOC109097672	0.412316	-1.27818	0.004781	0.134105	NP_001340623	-	-
LOC109097774	4.69075	2.22982	0.00095338	0.103421	NP_976311	MB	myoglobin(MB)
LOC109097778	0.245679	-2.02515	0.00095916	0.103421	NP_001129518	ZMYND15	zinc finger MYND-type containing 15(ZMYND15)
LOC109097779	0.361549	-1.46774	0.00279557	0.111843	NP_004956	HMGN1	high mobility group nucleosome binding domain 1(HMGN1)
LOC109097807	2.21788	1.14918	0.00741517	0.162138	NP_001243342	HVCN1	hydrogen voltage gated channel 1(HVCN1)
LOC109097844	2.99405	1.5821	0.00273062	0.110318	XP_016882902	PLA2G4C	phospholipase A2 group IVC(PLA2G4C)
LOC109097874	0.214768	-2.21915	0.000834514	0.103421	NP_114172	CCNB1	cyclin B1(CCNB1)
LOC109097894	2.32754	1.2188	0.0082443	0.170947	NP_001349995	-	-
LOC109098012	0.372229	-1.42574	0.00369605	0.125093	NP_004233	HMGN3	high mobility group nucleosomal binding domain 3(HMGN3)
LOC109098172	0.164472	-2.60409	0.00435609	0.129995	NP_006265	CCL19	C-C motif chemokine ligand 19(CCL19)
LOC109098518	0.258042	-1.95432	0.00105349	0.103421	NP_112181	FAM83D	family with sequence similarity 83 member D(FAM83D)
LOC109098526	2.95256	1.56197	0.00207042	0.107474	NP_001365684	-	-
LOC109098540	2.15116	1.10511	0.00842183	0.172453	NP_001278790	IGF2	insulin like growth factor 2(IGF2)
LOC109098635	0.408853	-1.29035	0.00550161	0.14232	NP_001092755	PTMA	prothymosin, alpha(PTMA)
LOC109098663	36.9084	5.20588	0.000233984	0.103421	NP_002480	NDUFA4	NDUFA4, mitochondrial complex associated(NDUFA4)
LOC109098710	3.13316	1.64762	0.00740379	0.162138	NP_079524	SRCIN1	SRC kinase signaling inhibitor 1(SRCIN1)
LOC109098765	0.431151	-1.21374	0.00859875	0.174339	XP_005265184	LAMB2	laminin subunit beta 2(LAMB2)
LOC109098869	3.07772	1.62186	0.00148374	0.103421	-	-	-
LOC109098887	3.4525	1.78764	0.00118163	0.103421	NP_005156	ALDOC	aldolase, fructose-bisphosphate C(ALDOC)
LOC109098978	3.58232	1.84089	0.00124395	0.103421	NP_001276792	PER3	period circadian clock 3(PER3)
LOC109098979	6.19882	2.63199	0.000536638	0.103421	-	-	-
LOC109099026	5.86047	2.55102	0.000390967	0.103421	NP_000424	NCF2	neutrophil cytosolic factor 2(NCF2)
LOC109099039	4.08299	2.02962	0.000851763	0.103421	NP_954635	ALAS1	5'-aminolevulinate synthase 1(ALAS1)
LOC109099040	3.7798	1.91831	0.00158414	0.103421	XP_024309161	-	-
LOC109099044	0.372481	-1.42476	0.00432907	0.129995	NP_004177	SEMA3F	semaphorin 3F(SEMA3F)
LOC109099130	0.386791	-1.37037	0.00483972	0.13421	XP_011543298	INCENP	inner centromere protein(INCENP)
LOC109099135	0.44819	-1.15782	0.00813689	0.16968	XP_016871417	ANKRD26	ankyrin repeat domain 26(ANKRD26)
LOC109099147	0.315092	-1.66615	0.00242375	0.107656	NP_001300884	AURKB	aurora kinase B(AURKB)
LOC109099225	4.91654	2.29764	0.00069567	0.103421	NP_001419	ENO1	enolase 1(ENO1)
LOC109099342	0.296472	-1.75403	0.00199953	0.107318	XP_016877784	NUSAP1	nucleolar and spindle associated protein 1(NUSAP1)
LOC109099356	3.10495	1.63457	0.00223111	0.107546	NP_001307587	FGFR2	fibroblast growth factor receptor 2(FGFR2)
LOC109099358	0.425741	-1.23195	0.0071997	0.160652	NP_001305073	AQP3	aquaporin 3 (Gill blood group)(AQP3)
LOC109099474	2.6489	1.4054	0.00391	0.127824	NP_001307730	ORMDL3	ORMDL sphingolipid biosynthesis regulator 3(ORMDL3)
LOC109099495	0.33098	-1.59519	0.00373174	0.125227	NP_003947	CH25H	cholesterol 25-hydroxylase(CH25H)
LOC109099512	5.99618	2.58404	0.000473624	0.103421	NP_071334	EGLN1	egl-9 family hypoxia inducible factor 1(EGLN1)
LOC109099546	2.61513	1.38688	0.00272302	0.110318	XP_024303908	-	-
LOC109099580	2.4489	1.29213	0.0045246	0.131677	NP_001710	BMP7	bone morphogenetic protein 7(BMP7)
LOC109099623	0.291561	-1.77813	0.0013015	0.103421	NP_006452	SPAG5	sperm associated antigen 5(SPAG5)
LOC109099648	0.293083	-1.77062	0.00634513	0.151207	XP_011525390	KLK15	kallikrein related peptidase 15(KLK15)
LOC109099655	0.41096	-1.28293	0.00417692	0.128851	XP_016872155	PLEKHS1	pleckstrin homology domain containing S1(PLEKHS1)
LOC109099700	3.57006	1.83595	0.00168524	0.104964	NP_001454	FRZB	frizzled-related protein(FRZB)
LOC109099701	3.54536	1.82593	0.00144523	0.103421	NP_001454	FRZB	frizzled-related protein(FRZB)
LOC109099731	0.289178	-1.78997	0.00339454	0.119913	NP_001278911	PTPRK	protein tyrosine phosphatase, receptor type K(PTPRK)
LOC109099988	0.41186	-1.27977	0.00616948	0.148311	NP_002901	RENBP	renin binding protein(RENBP)
LOC109100053	2.32095	1.21471	0.00748714	0.162777	NP_001128119	AFAP1	actin filament associated protein 1(AFAP1)
LOC109100072	4.40045	2.13765	0.00072982	0.103421	-	-	-
LOC109100183	3.36187	1.74927	0.00331252	0.118452	XP_005257847	SLC16A5	solute carrier family 16 member 5(SLC16A5)
LOC109100201	0.419182	-1.25435	0.00572267	0.145065	-	-	-
LOC109100202	0.426212	-1.23036	0.00437732	0.130392	-	-	-
LOC109100390	2.23037	1.15728	0.00903591	0.177089	NP_619527	BCL2L11	BCL2 like 11(BCL2L11)
LOC109100429	3.42394	1.77566	0.00223978	0.107546	NP_006652	PDE10A	phosphodiesterase 10A(PDE10A)
LOC109100558	3.2471	1.69915	0.0066785	0.155325	NP_000095	CYP1B1	cytochrome P450 family 1 subfamily B member 1(CYP1B1)
LOC109100594	3.51606	1.81396	0.00129671	0.103421	NP_005428	NCOA4	nuclear receptor coactivator 4(NCOA4)
LOC109100602	0.308425	-1.69701	0.00207076	0.107474	XP_006720624	NUSAP1	nucleolar and spindle associated protein 1(NUSAP1)
LOC109100643	0.271816	-1.8793	0.00165565	0.104306	XP_005247986	TACC3	transforming acidic coiled-coil containing protein 3(TACC3)
LOC109100680	0.255767	-1.9671	0.000785051	0.103421	NP_002080	CXCL2	C-X-C motif chemokine ligand 2(CXCL2)
LOC109100736	0.446671	-1.16272	0.00557971	0.143579	NP_689604	PQLC3	PQ loop repeat containing 3(PQLC3)
LOC109100909	0.240053	-2.05857	0.00111798	0.103421	NP_065726	SPC25	SPC25, NDC80 kinetochore complex component(SPC25)
LOC109101157	0.461011	-1.11713	0.00897726	0.177089	NP_000485	COL17A1	collagen type XVII alpha 1 chain(COL17A1)
LOC109101251	0.170544	-2.55179	0.000559311	0.103421	NP_006045	RTN3	reticulon 3(RTN3)
LOC109101386	0.383668	-1.38207	0.00272556	0.110318	NP_005931	MMP11	matrix metallopeptidase 11(MMP11)
LOC109101405	0.256451	-1.96324	0.00106113	0.103421	NP_001307676	EVPL	envoplakin(EVPL)
LOC109101419	0.223681	-2.16049	0.000718483	0.103421	NP_001307676	EVPL	envoplakin(EVPL)
LOC109101471	8.10882	3.01949	0.000284577	0.103421	NP_071334	EGLN1	egl-9 family hypoxia inducible factor 1(EGLN1)
LOC109101493	0.447331	-1.16059	0.00582271	0.145065	NP_001558	INPPL1	inositol polyphosphate phosphatase like 1(INPPL1)
LOC109101498	0.301799	-1.72834	0.00167151	0.104504	NP_001373117	-	-
LOC109101561	0.251561	-1.99102	0.00138526	0.103421	NP_001228	CCNA2	cyclin A2(CCNA2)
LOC109101961	2.70673	1.43655	0.00256652	0.107656	XP_006714819	SLC36A2	solute carrier family 36 member 2(SLC36A2)
LOC109101980	0.437986	-1.19104	0.00902641	0.177089	NP_001350590	-	-
LOC109102130	0.35837	-1.48048	0.00372016	0.125093	-	-	-
LOC109102183	2.64169	1.40146	0.00413995	0.128851	NP_689619	AFAP1L1	actin filament associated protein 1 like 1(AFAP1L1)
LOC109102208	2.9529	1.56213	0.00214458	0.107546	NP_003723	EIF4EBP3	eukaryotic translation initiation factor 4E binding protein 3(EIF4EBP3)
LOC109102219	3.9582	1.98485	0.00112243	0.103421	NP_003723	EIF4EBP3	eukaryotic translation initiation factor 4E binding protein 3(EIF4EBP3)
LOC109102265	4.43153	2.1478	0.00197083	0.107191	NP_000252	MYOC	myocilin(MYOC)
LOC109102360	2.91895	1.54545	0.00317148	0.117207	NP_001295282	RAMP1	receptor activity modifying protein 1(RAMP1)
LOC109102410	5.73448	2.51966	0.000989365	0.103421	NP_055297	BMP10	bone morphogenetic protein 10(BMP10)
LOC109102441	5.24122	2.3899	0.000403695	0.103421	NP_056284	NIPSNAP3A	nipsnap homolog 3A(NIPSNAP3A)
LOC109102475	3.45923	1.79045	0.00352843	0.122336	NP_001341681	-	-
LOC109102476	2.46894	1.30389	0.00429712	0.129995	XP_016870726	c9orf3	chromosome 9 open reading frame 3(C9orf3)
LOC109102516	0.47654	-1.06933	0.00858258	0.174257	NP_001307628	SETDB2	SET domain bifurcated 2(SETDB2)
LOC109102592	0.299532	-1.73922	0.00259866	0.108451	NP_002406	MIF	macrophage migration inhibitory factor (glycosylation-inhibiting factor)(MIF)
LOC109102597	0.0573218	-4.12477	0.000485049	0.103421	NP_001094347	PHYHD1	phytanoyl-CoA dioxygenase domain containing 1(PHYHD1)
LOC109102722	0.299965	-1.73714	0.00213129	0.107546	NP_001271231	ANLN	anillin actin binding protein(ANLN)
LOC109102759	0.318203	-1.65198	0.00267505	0.109581	NP_004334	CALR	calreticulin(CALR)
LOC109103157	0.35388	-1.49867	0.00396451	0.127824	NP_002044	gbp1	guanylate binding protein 1(GBP1)
LOC109103188	2.75346	1.46125	0.00814193	0.16968	NP_056006	SIK2	salt inducible kinase 2(SIK2)
LOC109103246	2.55757	1.35477	0.00281682	0.111877	NP_001108446	SMTNL2	smoothelin like 2(SMTNL2)
LOC109103354	2.22124	1.15137	0.00943117	0.182015	NP_741994	USP2	ubiquitin specific peptidase 2(USP2)
LOC109103408	3.63009	1.86001	0.00301024	0.115754	-	-	-
LOC109103539	2.33901	1.2259	0.00735916	0.162021	NP_056953	PPARG	peroxisome proliferator activated receptor gamma(PPARG)
LOC109103773	4.64638	2.21611	0.00142907	0.103421	NP_851397	HIF1A	hypoxia inducible factor 1 alpha subunit(HIF1A)
LOC109103780	5.62031	2.49065	0.000970542	0.103421	NP_851397	HIF1A	hypoxia inducible factor 1 alpha subunit(HIF1A)
LOC109103849	2.1818	1.12552	0.00765099	0.163997	NP_112177	LBH	limb bud and heart development(LBH)
LOC109103854	2.41706	1.27325	0.00729976	0.161331	NP_001002838	WNK3	WNK lysine deficient protein kinase 3(WNK3)
LOC109103990	0.280793	-1.83242	0.00184548	0.107013	NP_001284533	CDCA3	cell division cycle associated 3(CDCA3)
LOC109104016	3.21972	1.68694	0.00139945	0.103421	XP_005268284	CDC42BPB	CDC42 binding protein kinase beta(CDC42BPB)
LOC109104115	2.47001	1.30452	0.00398794	0.127824	NP_001375229	-	-
LOC109104263	4.13868	2.04917	0.0006783	0.103421	NP_001106678	TSTD1	thiosulfate sulfurtransferase like domain containing 1(TSTD1)
LOC109104268	0.460898	-1.11748	0.00769423	0.164244	NP_003029	SLC1A4	solute carrier family 1 member 4(SLC1A4)
LOC109104501	2.28769	1.19389	0.00605263	0.146808	NP_000356	TPI1	triosephosphate isomerase 1(TPI1)
LOC109104546	2.69263	1.42901	0.00488939	0.134472	NP_001276929	NFIL3	nuclear factor, interleukin 3 regulated(NFIL3)
LOC109104646	2.77916	1.47465	0.00480092	0.134105	NP_001276929	NFIL3	nuclear factor, interleukin 3 regulated(NFIL3)
LOC109104654	3.56442	1.83367	0.00501677	0.136348	NP_005323	HBZ	hemoglobin subunit zeta(HBZ)
LOC109104738	0.452188	-1.145	0.00973229	0.184823	NP_060677	TRIM62	tripartite motif containing 62(TRIM62)
LOC109104786	20.0261	4.32381	9.4e-05	0.103421	NP_061130	ZNF395	zinc finger protein 395(ZNF395)
LOC109104793	3.09431	1.62962	0.00290976	0.113646	-	-	-
LOC109105053	2.59736	1.37705	0.0031677	0.117207	NP_036215	FRAT2	frequently rearranged in advanced T-cell lymphomas 2(FRAT2)
LOC109105149	0.023547	-5.40832	9.37e-05	0.103421	NP_001165972	SLC6A2	solute carrier family 6 member 2(SLC6A2)
LOC109105227	0.31404	-1.67098	0.00625135	0.149841	NP_004102	FEN1	flap structure-specific endonuclease 1(FEN1)
LOC109105243	3.12589	1.64427	0.00159625	0.103421	NP_001722	BTG1	BTG anti-proliferation factor 1(BTG1)
LOC109105302	0.380617	-1.39359	0.00413642	0.128851	XP_005267516	SYNE2	spectrin repeat containing nuclear envelope protein 2(SYNE2)
LOC109105542	6.5814	2.7184	0.00115596	0.103421	-	-	-
LOC109105682	2.62668	1.39324	0.00564515	0.144584	NP_110389	BHLHE41	basic helix-loop-helix family member e41(BHLHE41)
LOC109105734	6.24671	2.6431	0.000433152	0.103421	NP_001357400	-	-
LOC109105798	0.437885	-1.19138	0.00547279	0.142163	NP_003175	TAF2	TATA-box binding protein associated factor 2(TAF2)
LOC109105829	2.35376	1.23497	0.00714327	0.16038	NP_001273130	RERGL	RERG like(RERGL)
LOC109105906	0.248455	-2.00895	0.00172765	0.105771	NP_002953	S100A5	S100 calcium binding protein A5(S100A5)
LOC109105919	2.25376	1.17233	0.00578419	0.145065	XP_016866867	rspo3	R-spondin 3(RSPO3)
LOC109105991	3.61271	1.85308	0.0014021	0.103421	NP_068779	MCL1	BCL2 family apoptosis regulator(MCL1)
LOC109106048	0.44373	-1.17225	0.00954901	0.183001	NP_001273005	RPA2	replication protein A2(RPA2)
LOC109106083	4.47404	2.16158	0.000891924	0.103421	NP_002056	GLUL	glutamate-ammonia ligase(GLUL)
LOC109106454	0.470541	-1.08761	0.00820682	0.1706	XP_011514639	CROT	carnitine O-octanoyltransferase(CROT)
LOC109106465	0.183316	-2.44759	0.000522319	0.103421	NP_004102	FEN1	flap structure-specific endonuclease 1(FEN1)
LOC109106633	2.4575	1.29719	0.00660671	0.154529	NP_002591	PDE4B	phosphodiesterase 4B(PDE4B)
LOC109106637	0.421999	-1.24469	0.00461447	0.131677	XP_005269750	MYOF	myoferlin(MYOF)
LOC109106657	0.276716	-1.85352	0.00115686	0.103421	XP_024309044	-	-
LOC109106770	2.06738	1.0478	0.00846742	0.173171	-	-	-
LOC109106889	6.54702	2.71084	0.000280896	0.103421	NP_055399	ERO1A	endoplasmic reticulum oxidoreductase 1 alpha(ERO1A)
LOC109106936	0.284858	-1.81168	0.00113942	0.103421	NP_004514	KIF11	kinesin family member 11(KIF11)
LOC109107030	2.68827	1.42668	0.00244453	0.107656	NP_057071	HEBP1	heme binding protein 1(HEBP1)
LOC109107111	2.4695	1.30422	0.00615391	0.148153	NP_001136249	HSD3B7	hydroxy-delta-5-steroid dehydrogenase, 3 beta- and steroid delta-isomerase 7(HSD3B7)
LOC109107112	3.14816	1.65451	0.0025549	0.107656	-	-	-
LOC109107114	2.62893	1.39448	0.00535039	0.140762	-	-	-
LOC109107231	4.01646	2.00592	0.000708966	0.103421	NP_116193	ADO	2-aminoethanethiol dioxygenase(ADO)
LOC109107242	4.8612	2.28131	0.000436125	0.103421	NP_116193	ADO	2-aminoethanethiol dioxygenase(ADO)
LOC109107243	2.8597	1.51587	0.00213366	0.107546	NP_001098028	ELOVL7	ELOVL fatty acid elongase 7(ELOVL7)
LOC109107288	2.19585	1.13478	0.00703349	0.1593	NP_001290027	TMEM198	transmembrane protein 198(TMEM198)
LOC109107332	0.435752	-1.19842	0.00628651	0.150246	NP_000205	JAG1	jagged 1(JAG1)
LOC109107423	2.34219	1.22786	0.00581733	0.145065	NP_000590	IGFBP5	insulin like growth factor binding protein 5(IGFBP5)
LOC109107444	0.341664	-1.54935	0.00409708	0.128851	NP_892006	SYNE1	spectrin repeat containing nuclear envelope protein 1(SYNE1)
LOC109107515	2.41174	1.27008	0.00837532	0.172105	NP_001184150	PDE4D	phosphodiesterase 4D(PDE4D)
LOC109107577	2.64177	1.40151	0.00302748	0.115769	NP_001263400	CORO1C	coronin 1C(CORO1C)
LOC109107665	7.76908	2.95774	0.000401031	0.103421	XP_006722127	FMNL1	formin like 1(FMNL1)
LOC109107725	0.413463	-1.27417	0.00364544	0.124361	NP_003774	B3GALT2	beta-1,3-galactosyltransferase 2(B3GALT2)
LOC109107846	2.6037	1.38056	0.0025312	0.107656	-	-	-
LOC109107852	0.232561	-2.10432	0.00121663	0.103421	XP_011507384	CENPF	centromere protein F(CENPF)
LOC109107871	0.321238	-1.63829	0.00286175	0.112844	-	-	-
LOC109107990	0.428199	-1.22365	0.00498238	0.13578	XP_005273819	CPT1A	carnitine palmitoyltransferase 1A(CPT1A)
LOC109108035	0.0950777	-3.39475	0.000347368	0.103421	-	-	-
LOC109108082	2.52397	1.33569	0.00417458	0.128851	-	-	-
LOC109108134	2.57362	1.3638	0.00285294	0.112767	NP_219494	CIPC	CLOCK interacting pacemaker(CIPC)
LOC109108167	2.58366	1.36942	0.00533374	0.140549	NP_005848	ZMPSTE24	zinc metallopeptidase STE24(ZMPSTE24)
LOC109108190	2.45895	1.29804	0.00322217	0.117403	NP_588613	FNIP1	folliculin interacting protein 1(FNIP1)
LOC109108239	2.1795	1.12399	0.00745077	0.162484	-	-	-
LOC109108289	2.62187	1.3906	0.00322604	0.117403	XP_011534927	PLEKHG3	pleckstrin homology and RhoGEF domain containing G3(PLEKHG3)
LOC109108305	2.36829	1.24385	0.00605337	0.146808	NP_001352951	-	-
LOC109108375	3.66633	1.87434	0.00125798	0.103421	NP_002667	PMM1	phosphomannomutase 1(PMM1)
LOC109108448	22.5915	4.49771	0.000210361	0.103421	NP_803253	LYNX1	Ly6/neurotoxin 1(LYNX1)
LOC109108501	0.428891	-1.22132	0.00606692	0.14692	NP_001615	AIM1	absent in melanoma 1(AIM1)
LOC109108527	3.23921	1.69564	0.00233805	0.107656	NP_068813	ST14	suppression of tumorigenicity 14(ST14)
LOC109108763	0.45261	-1.14366	0.00840864	0.172398	NP_066972	COTL1	coactosin like F-actin binding protein 1(COTL1)
LOC109108794	0.16947	-2.56089	0.000672277	0.103421	NP_659206	Prss21	protease, serine 21(PRSS21)
LOC109108799	4.58963	2.19838	0.000624041	0.103421	NP_000600	CXCL12	C-X-C motif chemokine ligand 12(CXCL12)
LOC109108896	0.329097	-1.60341	0.00463005	0.131677	XP_016871432	SEPHS1	selenophosphate synthetase 1(SEPHS1)
LOC109108940	0.129968	-2.94377	0.0049876	0.13578	NP_071317	CUZD1	CUB and zona pellucida like domains 1(CUZD1)
LOC109108976	2.16989	1.11762	0.00886913	0.17677	NP_055286	spink4	serine peptidase inhibitor, Kazal type 4(SPINK4)
LOC109109117	0.0775063	-3.68954	0.000658567	0.103421	NP_002112	HLA-DPB1	major histocompatibility complex, class II, DP beta 1(HLA-DPB1)
LOC109109143	2.63151	1.39589	0.00394727	0.127824	NP_001171647	TIPARP	TCDD inducible poly(ADP-ribose) polymerase(TIPARP)
LOC109109162	3.42429	1.7758	0.00544632	0.141736	NP_037385	DKK3	dickkopf WNT signaling pathway inhibitor 3(DKK3)
LOC109109188	0.420325	-1.25042	0.00714431	0.16038	XP_011521347	FHOD1	formin homology 2 domain containing 1(FHOD1)
LOC109109189	0.402564	-1.31271	0.0097662	0.184823	-	-	-
LOC109109230	2.26951	1.18238	0.00683588	0.156549	NP_002846	NECTIN1	nectin cell adhesion molecule 1(NECTIN1)
LOC109109260	3.53009	1.8197	0.00234911	0.107656	NP_001252509	FAM13A	family with sequence similarity 13 member A(FAM13A)
LOC109109266	2.71885	1.443	0.00759547	0.163472	NP_001171763	ADGRG2	adhesion G protein-coupled receptor G2(ADGRG2)
LOC109109363	0.399233	-1.3247	0.00445514	0.131283	NP_067082	TMEM8A	transmembrane protein 8A(TMEM8A)
LOC109109407	0.230127	-2.1195	0.000829778	0.103421	XP_006715810	ANLN	anillin actin binding protein(ANLN)
LOC109109444	2.37817	1.24985	0.00581091	0.145065	NP_001093138	HIGD1A	HIG1 hypoxia inducible domain family member 1A(HIGD1A)
LOC109109463	0.0360543	-4.79369	0.00101852	0.103421	NP_689848	OIT3	oncoprotein induced transcript 3(OIT3)
LOC109109482	0.440626	-1.18237	0.00574335	0.145065	NP_078902	VTCN1	V-set domain containing T cell activation inhibitor 1(VTCN1)
LOC109109600	0.377495	-1.40547	0.00398121	0.127824	NP_001269592	MICAL2	microtubule associated monooxygenase, calponin and LIM domain containing 2(MICAL2)
LOC109109747	2.21253	1.1457	0.00652258	0.153654	NP_001269395	WFDC1	WAP four-disulfide core domain 1(WFDC1)
LOC109110100	2.78308	1.47668	0.00225282	0.107546	NP_001171647	TIPARP	TCDD inducible poly(ADP-ribose) polymerase(TIPARP)
LOC109110122	2.46037	1.29887	0.00447298	0.131338	NP_005105	HS3ST1	heparan sulfate-glucosamine 3-sulfotransferase 1(HS3ST1)
LOC109110178	2.10147	1.0714	0.00883079	0.176287	NP_001269027	YAP1	Yes associated protein 1(YAP1)
LOC109110268	0.319319	-1.64693	0.00204486	0.107424	XP_016858495	KIF14	kinesin family member 14(KIF14)
LOC109110269	2.24812	1.16872	0.00527224	0.139536	NP_002383	MDM2	MDM2 proto-oncogene(MDM2)
LOC109110298	0.281407	-1.82927	0.00225161	0.107546	NP_002583	PCNA	proliferating cell nuclear antigen(PCNA)
LOC109110302	0.286939	-1.80118	0.00197424	0.107191	NP_002583	PCNA	proliferating cell nuclear antigen(PCNA)
LOC109110340	0.374216	-1.41806	0.00579113	0.145065	NP_001317091	ING5	inhibitor of growth family member 5(ING5)
LOC109110585	0.419773	-1.25232	0.00838389	0.172105	NP_001335054	-	-
LOC109110943	0.398264	-1.3282	0.00440017	0.130434	XP_011539974	AIM1L	absent in melanoma 1-like(AIM1L)
LOC109110959	2.24366	1.16585	0.00682456	0.156508	XP_011540768	SDC3	syndecan 3(SDC3)
LOC109111191	0.374508	-1.41693	0.00297211	0.115379	NP_001034864	AIM1L	absent in melanoma 1-like(AIM1L)
LOC109111276	2.17434	1.12058	0.00960125	0.183335	NP_859530	CERS2	ceramide synthase 2(CERS2)
LOC109111454	2.901	1.53655	0.00973982	0.184823	XP_011512881	JARID2	jumonji and AT-rich interaction domain containing 2(JARID2)
LOC109111574	2.56742	1.36032	0.00391813	0.127824	-	-	-
LOC109111638	0.34389	-1.53998	0.0038637	0.127071	XP_006715810	ANLN	anillin actin binding protein(ANLN)
LOC109111654	2.37823	1.24989	0.00519494	0.13867	XP_016867292	DLX5	distal-less homeobox 5(DLX5)
LOC109111662	0.347957	-1.52302	0.00250571	0.107656	NP_001177410	CLSPN	claspin(CLSPN)
LOC109111669	2.12029	1.08426	0.00883417	0.176287	NP_078851	TNFAIP8L2	TNF alpha induced protein 8 like 2(TNFAIP8L2)
LOC109111680	3.48376	1.80065	0.00119056	0.103421	NP_055569	PTDSS1	phosphatidylserine synthase 1(PTDSS1)
LOC109111719	0.403397	-1.30973	0.00474662	0.133874	NP_001095146	SAMD12	sterile alpha motif domain containing 12(SAMD12)
LOC109111828	0.39223	-1.35023	0.00428281	0.129995	XP_016861958	MYLK	myosin light chain kinase(MYLK)
LOC109111900	2.28995	1.19532	0.00523276	0.139002	NP_001369470	-	-
LOC109111980	0.0949965	-3.39598	0.00033082	0.103421	NP_000413	krt17	keratin 17(KRT17)
LOC109112075	0.284499	-1.81351	0.00174694	0.105996	XP_011527002	TPX2	TPX2, microtubule nucleation factor(TPX2)
LOC109112335	0.354146	-1.49759	0.00250876	0.107656	XP_016869381	EPPK1	epiplakin 1(EPPK1)
LOC109112590	0.343796	-1.54038	0.00312965	0.117207	NP_001014446	OCIAD2	OCIA domain containing 2(OCIAD2)
LOC109112616	2.77138	1.47061	0.00302003	0.115754	NP_001135858	PDK3	pyruvate dehydrogenase kinase 3(PDK3)
LOC109112777	0.260457	-1.94089	0.00122882	0.103421	NP_001025	RRM2	ribonucleotide reductase regulatory subunit M2(RRM2)
LOC109112791	4.48064	2.1637	0.000718298	0.103421	NP_996809	SELENON	selenoprotein N(SELENON)
LOC109112998	0.431769	-1.21167	0.00870667	0.175304	NP_000129	FBN1	fibrillin 1(FBN1)
LOC109113011	0.387044	-1.36943	0.00311596	0.117207	XP_011532668	PAICS	phosphoribosylaminoimidazole carboxylase; phosphoribosylaminoimidazolesuccinocarboxamide synthase(PAICS)
LOC109113064	0.484689	-1.04487	0.00834641	0.17198	NP_000174	HADHB	hydroxyacyl-CoA dehydrogenase/3-ketoacyl-CoA thiolase/enoyl-CoA hydratase (trifunctional protein), beta subunit(HADHB)
LOC109113066	0.377071	-1.40709	0.00318967	0.117207	NP_000173	HADHA	hydroxyacyl-CoA dehydrogenase/3-ketoacyl-CoA thiolase/enoyl-CoA hydratase (trifunctional protein), alpha subunit(HADHA)
LOC109113259	2.08112	1.05736	0.00899404	0.177089	NP_116189	c1orf198	chromosome 1 open reading frame 198(C1orf198)
LOC109113318	14.4542	3.85341	0.000352114	0.103421	NP_000252	MYOC	myocilin(MYOC)
LOC109113370	0.431598	-1.21224	0.00871296	0.175304	XP_016865658	BTN2A2	butyrophilin subfamily 2 member A2(BTN2A2)
LOC109113399	0.477376	-1.0668	0.00823028	0.170872	NP_775268	PTK2B	protein tyrosine kinase 2 beta(PTK2B)
LOC109113563	0.36329	-1.46081	0.00463668	0.131677	NP_001159403	RRM2	ribonucleotide reductase regulatory subunit M2(RRM2)
LOC109113598	11.6081	3.53706	0.00016097	0.103421	NP_002094	GYS1	glycogen synthase 1(GYS1)
ltbp1	0.342777	-1.54466	0.00255083	0.107656	NP_996826	LTBP1	latent transforming growth factor beta binding protein 1(LTBP1)
mad1l1	0.391922	-1.35136	0.00589814	0.145577	NP_001013859	MAD1L1	MAD1 mitotic arrest deficient like 1(MAD1L1)
mapk1	2.08845	1.06243	0.00826525	0.171166	NP_002736	MAPK1	mitogen-activated protein kinase 1(MAPK1)
marcks	0.356035	-1.48991	0.00315125	0.117207	NP_002347	MARCKS	myristoylated alanine rich protein kinase C substrate(MARCKS)
mcoln3	4.45988	2.15701	0.00173374	0.105771	NP_060768	MCOLN3	mucolipin 3(MCOLN3)
mtf2	0.38971	-1.35953	0.00474112	0.133874	NP_031384	MTF2	metal response element binding transcription factor 2(MTF2)
ncapd2	0.267118	-1.90445	0.000916507	0.103421	NP_055680	NCAPD2	non-SMC condensin I complex subunit D2(NCAPD2)
ncapg2	0.214447	-2.22131	0.000615927	0.103421	NP_001268861	NCAPG2	non-SMC condensin II complex subunit G2(NCAPG2)
ndc80	0.278434	-1.84459	0.0011428	0.103421	NP_006092	NDC80	NDC80, kinetochore complex component(NDC80)
nuf2	0.271952	-1.87857	0.00117495	0.103421	NP_113611	NUF2	NUF2, NDC80 kinetochore complex component(NUF2)
nup37	0.473393	-1.07889	0.00930924	0.180509	NP_076962	NUP37	nucleoporin 37(NUP37)
pdia4	0.444882	-1.16851	0.00874278	0.175407	NP_004902	PDIA4	protein disulfide isomerase family A member 4(PDIA4)
pgm1	3.07839	1.62217	0.00163296	0.103422	NP_002624	PGM1	phosphoglucomutase 1(PGM1)
pik3r3	3.10195	1.63317	0.00220201	0.107546	NP_001107644	PIK3R3	phosphoinositide-3-kinase regulatory subunit 3(PIK3R3)
pold2	0.425164	-1.23391	0.00721043	0.160652	NP_006221	POLD2	DNA polymerase delta 2, accessory subunit(POLD2)
polr2h	0.460106	-1.11996	0.0078698	0.16616	NP_006223	POLR2H	RNA polymerase II subunit H(POLR2H)
pparg	2.3989	1.26237	0.00450867	0.131677	NP_056953	PPARG	peroxisome proliferator activated receptor gamma(PPARG)
ptgs2	0.375009	-1.415	0.00414165	0.128851	NP_000954	PTGS2	prostaglandin-endoperoxide synthase 2(PTGS2)
rpa1	0.375814	-1.41191	0.00433895	0.129995	NP_002936	RPA1	replication protein A1(RPA1)
selplg	3.18603	1.67176	0.00135367	0.103421	NP_002997	SELPLG	selectin P ligand(SELPLG)
slc6a8	2.30785	1.20655	0.00544773	0.141736	NP_001136278	SLC6A8	solute carrier family 6 member 8(SLC6A8)
terf1	0.319685	-1.64528	0.00241816	0.107656	NP_003209	TERF1	telomeric repeat binding factor 1(TERF1)
trpm2	0.297843	-1.74738	0.0022665	0.107546	NP_001307280	TRPM2	transient receptor potential cation channel subfamily M member 2(TRPM2)
ttpa	2.80448	1.48773	0.002511	0.107656	NP_000361	TTPA	alpha tocopherol transfer protein(TTPA)
twf1	0.47453	-1.07543	0.00986713	0.185848	NP_002813	TWF1	twinfilin actin binding protein 1(TWF1)
ube2c	0.246223	-2.02196	0.00127927	0.103421	NP_008950	UBE2C	ubiquitin conjugating enzyme E2 C(UBE2C)
uprt	2.7362	1.45217	0.00233018	0.107656	NP_659489	UPRT	uracil phosphoribosyltransferase homolog(UPRT)
vrk1	0.473715	-1.07791	0.00726787	0.161232	XP_006720310	VRK1	vaccinia related kinase 1(VRK1)
zbtb16	2.64359	1.4025	0.00709071	0.159935	NP_001018011	ZBTB16	zinc finger and BTB domain containing 16(ZBTB16)

## Sheet: Head Kidney
Sequence_id	Fold Change	logFC	p-value	FDR	Refseq	Gene_symbol	Gene_Name
bcl2l1	5.47471	2.45278	0.00576573	0.114927	NP_001309171	BCL2L1	BCL2 like 1(BCL2L1)
brox	3.01407	1.59171	0.00762786	0.128645	XP_006711236	BROX	BRO1 domain and CAAX motif containing(BROX)
c33h14orf1	0.190163	-2.39469	0.00323324	0.090726	NP_009107	C14orf1	chromosome 14 open reading frame 1(C14orf1)
ccng2	6.13206	2.61637	0.002256	0.0849606	NP_004345	CCNG2	cyclin G2(CCNG2)
cdc42bpb	4.76535	2.25258	0.00385922	0.0962781	NP_006026	CDC42BPB	CDC42 binding protein kinase beta(CDC42BPB)
cemip	5.2666	2.39687	0.00157028	0.0827545	NP_001280227	cemip	cell migration inducing hyaluronan binding protein(CEMIP)
cunh14orf180	0.199505	-2.3255	0.00194383	0.0841807	NP_694972	NPHP3	nephrocystin 3(NPHP3)
cunh14orf28	3.12326	1.64305	0.00792159	0.128645	NP_001017923	c14orf28	chromosome 14 open reading frame 28(C14orf28)
dapk3	8.21062	3.03749	0.00228082	0.0849606	NP_001362587
gldc	4.45418	2.15516	0.00924364	0.136312	NP_000161	GLDC	glycine decarboxylase(GLDC)
grhpr	0.344218	-1.53861	0.00871491	0.13303	XP_005251688	GRHPR	glyoxylate and hydroxypyruvate reductase(GRHPR)
hif1an	7.43619	2.89456	0.00145243	0.080201	NP_060372	HIF1AN	hypoxia inducible factor 1 alpha subunit inhibitor(HIF1AN)
hmgcs1	0.123584	-3.01644	0.00214134	0.0849606	NP_001311149	HMGCS1	3-hydroxy-3-methylglutaryl-CoA synthase 1(HMGCS1)
hopx	6.46071	2.69169	0.00190009	0.0841807	NP_631957	HOPX	HOP homeobox(HOPX)
klf12	9.21619	3.20417	0.00127913	0.080201	XP_016875873	KLF12	Kruppel like factor 12(KLF12)
LOC109045144	0.125509	-2.99414	0.00112694	0.080201
LOC109045183	0.108054	-3.21018	0.00195207	0.0841807	NP_001188258	PPP1R3B	protein phosphatase 1 regulatory subunit 3B(PPP1R3B)
LOC109045217	2.89566	1.53389	0.00996191	0.139871	NP_057609	UBAP1	ubiquitin associated protein 1(UBAP1)
LOC109045478	3.25855	1.70423	0.00704868	0.12496	XP_016864732	ELL2	elongation factor for RNA polymerase II 2(ELL2)
LOC109046528	28.5654	4.83619	0.000283246	0.0794937	NP_068370	NR1D1	nuclear receptor subfamily 1 group D member 1(NR1D1)
LOC109046545	0.0975206	-3.35815	0.00136923	0.080201	NP_006736	MSMO1	methylsterol monooxygenase 1(MSMO1)
LOC109046546	0.139781	-2.83876	0.00223443	0.0849606	NP_006736	MSMO1	methylsterol monooxygenase 1(MSMO1)
LOC109046759	5.07979	2.34477	0.00476693	0.105325	NP_001248332	NFKB2	nuclear factor kappa B subunit 2(NFKB2)
LOC109046770	0.111472	-3.16524	0.00179641	0.0839088
LOC109047026	3.37458	1.75471	0.00947449	0.138776	NP_001309864	NFKB2	nuclear factor kappa B subunit 2(NFKB2)
LOC109047177	5.21674	2.38315	0.00256027	0.0849606	NP_001722	BTG1	BTG anti-proliferation factor 1(BTG1)
LOC109047202	3.98114	1.99318	0.0036268	0.0960758	NP_001116857	BCOR	BCL6 corepressor(BCOR)
LOC109047590	14.0985	3.81747	0.000459213	0.0794937	NP_001340275
LOC109047935	3.8927	1.96077	0.00906629	0.134611	NP_775873	DIP2B	disco interacting protein 2 homolog B(DIP2B)
LOC109048035	4.72774	2.24115	0.00519929	0.108888	NP_001121132	MFN2	mitofusin 2(MFN2)
LOC109048049	745.72	9.54249	4.41e-05	0.0794937	NP_071356	EGLN3	egl-9 family hypoxia inducible factor 3(EGLN3)
LOC109048069	8.22064	3.03925	0.00770947	0.128645	XP_011540502	CPTP	ceramide-1-phosphate transfer protein(CPTP)
LOC109048214	4.09935	2.03539	0.00417084	0.099889	XP_011540502	CPTP	ceramide-1-phosphate transfer protein(CPTP)
LOC109048339	5.13137	2.35934	0.00590981	0.116368	NP_002323	LRP1	LDL receptor related protein 1(LRP1)
LOC109048368	9.20927	3.20309	0.000733317	0.0794937	NP_000293	PLOD1	procollagen-lysine,2-oxoglutarate 5-dioxygenase 1(PLOD1)
LOC109048372	377.672	8.56099	9.09e-05	0.0794937	NP_071334	EGLN1	egl-9 family hypoxia inducible factor 1(EGLN1)
LOC109048810	4.89666	2.2918	0.0075588	0.128552	NP_001357267
LOC109048903	17.7319	4.14828	0.000559124	0.0794937	NP_001291	KLF6	Kruppel like factor 6(KLF6)
LOC109048905	16.8723	4.07659	0.000644302	0.0794937	NP_001291	KLF6	Kruppel like factor 6(KLF6)
LOC109048959	8.52474	3.09166	0.00178246	0.0839088	NP_068779	MCL1	BCL2 family apoptosis regulator(MCL1)
LOC109049059	7.52851	2.91236	0.00290068	0.0891823	XP_016862499	BDH1	3-hydroxybutyrate dehydrogenase, type 1(BDH1)
LOC109049077	3.08764	1.62651	0.00897378	0.134479	NP_004573	RABGGTB	Rab geranylgeranyltransferase beta subunit(RABGGTB)
LOC109049230	0.25632	-1.96398	0.0060362	0.116748	NP_001356623
LOC109049340	0.225502	-2.14879	0.00380462	0.0960758	XP_016878731	abcc1	ATP binding cassette subfamily C member 1(ABCC1)
LOC109049349	4.00986	2.00355	0.00376808	0.0960758	NP_874389	CREM	cAMP responsive element modulator(CREM)
LOC109049368	0.0520047	-4.26521	0.000473495	0.0794937	XP_024303748
LOC109049468	4.57447	2.1936	0.00338822	0.0924848	NP_001073888	UNK	unkempt family zinc finger(UNK)
LOC109049746	0.247446	-2.01482	0.00541825	0.111057	NP_001138302	FMO5	flavin containing monooxygenase 5(FMO5)
LOC109050206	0.196698	-2.34595	0.002259	0.0849606	XP_016856291	FMO5	flavin containing monooxygenase 5(FMO5)
LOC109050533	7.69108	2.94319	0.00193184	0.0841807	NP_001186310	RNF145	ring finger protein 145(RNF145)
LOC109050616	4.01485	2.00534	0.00933883	0.137405	NP_001032242	FOXK1	forkhead box K1(FOXK1)
LOC109050692	12.6569	3.66185	0.00125844	0.080201	NP_001816	CKMT2	creatine kinase, mitochondrial 2(CKMT2)
LOC109051339	0.193289	-2.37117	0.00561038	0.113567	XP_016869681	UNC13B	unc-13 homolog B(UNC13B)
LOC109051412	0.339015	-1.56058	0.00867163	0.13303	NP_001373857
LOC109051662	0.183785	-2.44391	0.00265811	0.0861838	NP_008826	HNMT	histamine N-methyltransferase(HNMT)
LOC109051748	13.4263	3.74699	0.00276961	0.0876326	NP_001158504	RNF182	ring finger protein 182(RNF182)
LOC109051819	0.0806465	-3.63224	0.000385846	0.0794937	NP_036461	MMD	monocyte to macrophage differentiation associated(MMD)
LOC109052064	0.0978975	-3.35258	0.00552808	0.112576	NP_005902	MAT2A	methionine adenosyltransferase 2A(MAT2A)
LOC109052152	153.392	7.26108	8.32e-05	0.0794937	NP_057419	PRODH	proline dehydrogenase 1(PRODH)
LOC109052206	4.72556	2.24049	0.00469751	0.104608	XP_024306453
LOC109052358	11.4044	3.51152	0.000859473	0.0795672	XP_005250008	GIMAP8	GTPase, IMAP family member 8(GIMAP8)
LOC109052440	13.1854	3.72087	0.000915696	0.0795672	NP_036272	SLC25A10	solute carrier family 25 member 10(SLC25A10)
LOC109052602	12.9621	3.69623	0.000865154	0.0795672	NP_002990	SDC4	syndecan 4(SDC4)
LOC109052677	8.80817	3.13884	0.000894065	0.0795672	NP_000043	ATP7A	ATPase copper transporting alpha(ATP7A)
LOC109052787	9.47598	3.24427	0.00115804	0.080201	NP_001156731	FAM63A	family with sequence similarity 63 member A(FAM63A)
LOC109052796	4.14951	2.05294	0.00441303	0.10202	NP_001156731	FAM63A	family with sequence similarity 63 member A(FAM63A)
LOC109052891	6.90559	2.78776	0.00145533	0.080201	NP_055429	PSME4	proteasome activator subunit 4(PSME4)
LOC109052951	4.21985	2.07719	0.004397	0.10202	NP_001280627	SEPT9	septin 9(SEPT9)
LOC109052977	3.61089	1.85235	0.00444572	0.102377	NP_001335122
LOC109053018	6.78346	2.76202	0.00246998	0.0849606	NP_006460	IVNS1ABP	influenza virus NS1A binding protein(IVNS1ABP)
LOC109053148	5.94689	2.57214	0.00162995	0.0827545	NP_002351	MAFK	MAF bZIP transcription factor K(MAFK)
LOC109053175	0.0989118	-3.33771	0.00165752	0.0827545	NP_001316360	TP53INP2	tumor protein p53 inducible nuclear protein 2(TP53INP2)
LOC109053382	18.9709	4.24571	0.000232259	0.0794937	NP_004411	DUSP8	dual specificity phosphatase 8(DUSP8)
LOC109053498	2.83669	1.50421	0.00982433	0.139616	NP_056412	GPSM1	G-protein signaling modulator 1(GPSM1)
LOC109053681	4.2962	2.10306	0.00960886	0.139616	NP_005339	HSP90AA1	heat shock protein 90 alpha family class A member 1(HSP90AA1)
LOC109053699	21.4259	4.42129	0.000771402	0.0795672	NP_001231627	ZFP36L1	ZFP36 ring finger protein like 1(ZFP36L1)
LOC109053795	4.54432	2.18406	0.00975961	0.139616	XP_011518916	CLEC4E	C-type lectin domain family 4 member E(CLEC4E)
LOC109053821	4.60629	2.20361	0.00423048	0.10027	XP_016864712	F2RL1	F2R like trypsin receptor 1(F2RL1)
LOC109053861	8.99209	3.16866	0.000698369	0.0794937	XP_016878683	EEF2K	eukaryotic elongation factor 2 kinase(EEF2K)
LOC109053947	10.4511	3.38558	0.000355887	0.0794937	NP_005188	FOXN3	forkhead box N3(FOXN3)
LOC109053990	4.99021	2.3191	0.00611201	0.117171	XP_011527690	ACSS1	acyl-CoA synthetase short-chain family member 1(ACSS1)
LOC109054176	3.31714	1.72994	0.00703453	0.12496	NP_057609	UBAP1	ubiquitin associated protein 1(UBAP1)
LOC109054340	9.51454	3.25013	0.000433322	0.0794937	NP_000293	PLOD1	procollagen-lysine,2-oxoglutarate 5-dioxygenase 1(PLOD1)
LOC109054541	3.67467	1.87762	0.00914822	0.135211	NP_001180412	LIMS1	LIM zinc finger domain containing 1(LIMS1)
LOC109054829	3.21271	1.68379	0.00965799	0.139616	NP_477515	UBE2J2	ubiquitin conjugating enzyme E2 J2(UBE2J2)
LOC109054872	3.10009	1.63231	0.00947455	0.138776	NP_004178	KDM5C	lysine demethylase 5C(KDM5C)
LOC109055045	7.71674	2.94799	0.00317277	0.090726	NP_001354354
LOC109055113	0.255535	-1.9684	0.00339537	0.0924848	NP_871629	STARD5	StAR related lipid transfer domain containing 5(STARD5)
LOC109055120	2.95011	1.56077	0.00883679	0.134262	NP_036234	RERE	arginine-glutamic acid dipeptide repeats(RERE)
LOC109055222	5.44807	2.44574	0.00790433	0.128645	NP_002189	IRF1	interferon regulatory factor 1(IRF1)
LOC109055393	47.0289	5.55548	0.000107212	0.0794937	NP_001017962	P4HA1	prolyl 4-hydroxylase subunit alpha 1(P4HA1)
LOC109055787	4.37337	2.12874	0.00313087	0.090726	NP_001340766
LOC109055798	0.197173	-2.34247	0.00207407	0.0844926	NP_001369506
LOC109055864	3.2101	1.68262	0.00796786	0.128645	NP_001365932
LOC109056009	0.108345	-3.2063	0.00367559	0.0960758	XP_011515548	SQLE	squalene epoxidase(SQLE)
LOC109056102	9.96274	3.31654	0.000534627	0.0794937	NP_060372	HIF1AN	hypoxia inducible factor 1 alpha subunit inhibitor(HIF1AN)
LOC109056125	5.65772	2.50022	0.00121537	0.080201	NP_003611	PPM1D	protein phosphatase, Mg2+/Mn2+ dependent 1D(PPM1D)
LOC109056139	4.07164	2.02561	0.00473095	0.104885	NP_001159933	MPP1	membrane palmitoylated protein 1(MPP1)
LOC109056147	0.141841	-2.81765	0.00314131	0.090726	NP_055577	DHCR24	24-dehydrocholesterol reductase(DHCR24)
LOC109056206	4.96678	2.31231	0.00461288	0.103703	NP_005323	HBZ	hemoglobin subunit zeta(HBZ)
LOC109056673	75.3566	6.23566	0.000230174	0.0794937	NP_006507	SLC2A1	solute carrier family 2 member 1(SLC2A1)
LOC109056719	4.52862	2.17907	0.00714912	0.125263	NP_001092	ACTB	actin beta(ACTB)
LOC109057161	24.7716	4.63062	0.000606683	0.0794937	NP_005518	HSPA1L	heat shock protein family A (Hsp70) member 1 like(HSPA1L)
LOC109057293	3.40994	1.76975	0.00995763	0.139871	NP_073728	PER2	period circadian clock 2(PER2)
LOC109057669	7.0808	2.82391	0.00901027	0.134479	NP_000773	cyp24a1	cytochrome P450 family 24 subfamily A member 1(CYP24A1)
LOC109057804	27.8157	4.79783	0.000636152	0.0794937	NP_001157704	DDHD2	DDHD domain containing 2(DDHD2)
LOC109057953	7.81757	2.96672	0.00300104	0.0897284	NP_001273200	HMOX2	heme oxygenase 2(HMOX2)
LOC109058034	15.031	3.90986	0.000360508	0.0794937	NP_064706	MNT	MAX network transcriptional repressor(MNT)
LOC109058049	0.234233	-2.09399	0.00805236	0.129274	XP_005264324	EML4	echinoderm microtubule associated protein like 4(EML4)
LOC109058092	3.51039	1.81163	0.00983775	0.139616	NP_002244	KDR	kinase insert domain receptor(KDR)
LOC109058272	3.20525	1.68044	0.00668038	0.12156	NP_001341743
LOC109058285	3.82644	1.936	0.0041064	0.0992906	NP_085150	KDM7A	lysine demethylase 7A(KDM7A)
LOC109058450	0.240792	-2.05414	0.01	0.139871
LOC109059120	0.249207	-2.00458	0.00554418	0.112576	NP_057006	NSDHL	NAD(P) dependent steroid dehydrogenase-like(NSDHL)
LOC109059373	9.44891	3.24015	0.00205137	0.0843456	NP_001558	INPPL1	inositol polyphosphate phosphatase like 1(INPPL1)
LOC109060553	4.41659	2.14293	0.00391088	0.0969245	NP_065891	FNIP2	folliculin interacting protein 2(FNIP2)
LOC109060581	10.0004	3.32199	0.00105587	0.080201	NP_001668	ATP1B1	ATPase Na+/K+ transporting subunit beta 1(ATP1B1)
LOC109061070	3.71798	1.89452	0.00536749	0.110713	NP_001349712
LOC109061233	4.90183	2.29332	0.00178302	0.0839088	NP_001073285	INSR	insulin receptor(INSR)
LOC109061326	5.73146	2.5189	0.00297043	0.0897284	NP_001640	SHROOM2	shroom family member 2(SHROOM2)
LOC109061494	3.77509	1.91651	0.00813364	0.129584	NP_005130	ANXA3	annexin A3(ANXA3)
LOC109061682	4.12592	2.04472	0.00975823	0.139616	NP_002060	GNAI1	G protein subunit alpha i1(GNAI1)
LOC109061683	4.80628	2.26492	0.00437355	0.10202
LOC109061719	3.95666	1.98428	0.00693081	0.124184	XP_005249021	ANKS1A	ankyrin repeat and sterile alpha motif domain containing 1A(ANKS1A)
LOC109061993	3.03188	1.60021	0.00851576	0.132931
LOC109062096	0.157549	-2.66613	0.00351281	0.0938382	NP_683878	PANK1	pantothenate kinase 1(PANK1)
LOC109062323	7.91059	2.98379	0.000952169	0.0795672	NP_001128711	LDHA	lactate dehydrogenase A(LDHA)
LOC109062325	4.75512	2.24948	0.00339947	0.0924848	NP_001128711	LDHA	lactate dehydrogenase A(LDHA)
LOC109062808	14.9905	3.90598	0.000701086	0.0794937	XP_016859590	eml6	echinoderm microtubule associated protein like 6(EML6)
LOC109062858	6.66457	2.73651	0.00914758	0.135211	NP_000587	IGFBP1	insulin like growth factor binding protein 1(IGFBP1)
LOC109062881	4.69845	2.23219	0.00634665	0.118878	NP_000161	GLDC	glycine decarboxylase(GLDC)
LOC109062899	4.83157	2.27249	0.00834673	0.131411	NP_006381	IPO8	importin 8(IPO8)
LOC109062905	7.71006	2.94674	0.00243651	0.0849606	NP_001017926	ZHX1	zinc fingers and homeoboxes 1(ZHX1)
LOC109063083	55.2925	5.78901	0.00387003	0.0962781	NP_002582	PCK1	phosphoenolpyruvate carboxykinase 1(PCK1)
LOC109063580	4.03383	2.01215	0.00669532	0.12156	NP_002060	GNAI1	G protein subunit alpha i1(GNAI1)
LOC109063739	11.7908	3.55959	0.000342166	0.0794937	NP_001193726	PKM	pyruvate kinase, muscle(PKM)
LOC109063801	5.30214	2.40657	0.0050789	0.108888	NP_071334	EGLN1	egl-9 family hypoxia inducible factor 1(EGLN1)
LOC109063836	15.9549	3.99593	0.000799666	0.0795672	NP_006136	DNAJB1	DnaJ heat shock protein family (Hsp40) member B1(DNAJB1)
LOC109063875	0.129976	-2.94368	0.00584502	0.115799	NP_000518	LDLR	low density lipoprotein receptor(LDLR)
LOC109064220	0.148585	-2.75064	0.0019222	0.0841807	NP_003271	TNNC1	troponin C1, slow skeletal and cardiac type(TNNC1)
LOC109064295	0.155493	-2.68508	0.00797369	0.128645	NP_001437	FABP7	fatty acid binding protein 7(FABP7)
LOC109064947	0.27951	-1.83903	0.00621352	0.118332	NP_060481	ARGLU1	arginine and glutamate rich 1(ARGLU1)
LOC109065151	3.77336	1.91585	0.00331415	0.0919217	NP_001026855	TP53BP2	tumor protein p53 binding protein 2(TP53BP2)
LOC109065320	6.20188	2.63271	0.00120373	0.080201	XP_016880385	NUFIP2	NUFIP2, FMR1 interacting protein 2(NUFIP2)
LOC109065336	6.46443	2.69252	0.00322416	0.090726	NP_001252507	FAM13A	family with sequence similarity 13 member A(FAM13A)
LOC109065360	6.09857	2.60847	0.00130094	0.080201	XP_016864388	LOC100506514	uncharacterized LOC100506514(LOC100506514)
LOC109065510	21.188	4.40518	0.000710909	0.0794937	NP_061130	ZNF395	zinc finger protein 395(ZNF395)
LOC109065707	7.20171	2.84834	0.00232822	0.0849606	NP_001106177	SCIN	scinderin(SCIN)
LOC109065791	0.0766993	-3.70464	0.000554993	0.0794937	NP_001274671	FDFT1	farnesyl-diphosphate farnesyltransferase 1(FDFT1)
LOC109065938	5.89672	2.55991	0.00257814	0.0849606	NP_001165095	VEGFA	vascular endothelial growth factor A(VEGFA)
LOC109066003	0.187994	-2.41124	0.00203883	0.0843456	NP_001186608	TMEM56	transmembrane protein 56(TMEM56)
LOC109066294	4.10381	2.03696	0.00340539	0.0924848	NP_001354801
LOC109066295	4.07029	2.02513	0.00861815	0.13303	NP_001354801
LOC109066551	5.05505	2.33773	0.00516214	0.108888	NP_001265281	ACO1	aconitase 1(ACO1)
LOC109066847	4.42267	2.14492	0.00638345	0.118878	NP_001035545	SIDT2	SID1 transmembrane family member 2(SIDT2)
LOC109067100	6.21735	2.6363	0.00173923	0.0839088	NP_064706	MNT	MAX network transcriptional repressor(MNT)
LOC109067314	0.224768	-2.15349	0.00776784	0.128645	NP_008875	SPP2	secreted phosphoprotein 2(SPP2)
LOC109067315	0.176417	-2.50294	0.00540949	0.111057	NP_008875	SPP2	secreted phosphoprotein 2(SPP2)
LOC109067621	6.26444	2.64719	0.00714634	0.125263	NP_001231627	ZFP36L1	ZFP36 ring finger protein like 1(ZFP36L1)
LOC109067900	6.88292	2.78302	0.00190694	0.0841807	NP_004678	MTMR4	myotubularin related protein 4(MTMR4)
LOC109067925	0.106411	-3.23229	0.00201407	0.0841807	NP_000850	HMGCR	3-hydroxy-3-methylglutaryl-CoA reductase(HMGCR)
LOC109067975	0.0270697	-5.20718	0.000720632	0.0794937	NP_009057	VCP	valosin containing protein(VCP)
LOC109068184	4.66656	2.22236	0.0029165	0.0892477	NP_061881	MIEF1	mitochondrial elongation factor 1(MIEF1)
LOC109068256	6.42062	2.68271	0.00245484	0.0849606	NP_001269071	TFE3	transcription factor binding to IGHM enhancer 3(TFE3)
LOC109068350	10.3976	3.37818	0.00104238	0.080201	NP_001035787	UEVLD	UEV and lactate/malate dehyrogenase domains(UEVLD)
LOC109068513	5.60008	2.48545	0.00521221	0.108888	NP_001138870	TEF	TEF, PAR bZIP transcription factor(TEF)
LOC109068514	3.44385	1.78402	0.00826264	0.130402	NP_057356	tob2	transducer of ERBB2, 2(TOB2)
LOC109068577	3.12484	1.64378	0.00707428	0.12496	NP_694533	SPPL2B	signal peptide peptidase like 2B(SPPL2B)
LOC109068950	46.2839	5.53244	0.000680118	0.0794937
LOC109069178	5.82946	2.54336	0.00592729	0.116368	NP_001186311	RNF145	ring finger protein 145(RNF145)
LOC109069312	0.256861	-1.96094	0.00799923	0.128738	NP_001334548
LOC109069551	10.6163	3.40821	0.000706852	0.0794937	NP_002094	GYS1	glycogen synthase 1(GYS1)
LOC109069654	7.88025	2.97824	0.00245135	0.0849606	NP_001020775	ARRDC2	arrestin domain containing 2(ARRDC2)
LOC109070084	3.43321	1.77956	0.00852488	0.132931	NP_065192	PAIP2B	poly(A) binding protein interacting protein 2B(PAIP2B)
LOC109070134	5.00882	2.32447	0.00373897	0.0960758
LOC109070211	12.4515	3.63825	0.000894438	0.0795672	NP_001184249	MCL1	BCL2 family apoptosis regulator(MCL1)
LOC109070312	0.1384	-2.85308	0.0047024	0.104608	XP_011541659	HMGCR	3-hydroxy-3-methylglutaryl-CoA reductase(HMGCR)
LOC109070313	0.205058	-2.28589	0.00411299	0.0992906
LOC109071096	28.5035	4.83307	0.00033596	0.0794937	NP_951009	MKNK2	MAP kinase interacting serine/threonine kinase 2(MKNK2)
LOC109071097	0.325863	-1.61766	0.00818226	0.129584	NP_060481	ARGLU1	arginine and glutamate rich 1(ARGLU1)
LOC109071132	3.27743	1.71256	0.00897748	0.134479	NP_001035545	SIDT2	SID1 transmembrane family member 2(SIDT2)
LOC109071159	4.19405	2.06834	0.00251142	0.0849606	NP_001128522	IGSF9	immunoglobulin superfamily member 9(IGSF9)
LOC109071202	9.12077	3.18916	0.000972205	0.080201	NP_001304913	SLC27A6	solute carrier family 27 member 6(SLC27A6)
LOC109071391	4.99119	2.31939	0.00663687	0.12156	NP_001155059	GYS1	glycogen synthase 1(GYS1)
LOC109071412	0.198071	-2.33591	0.00397824	0.0980899	NP_001243412	EPHX2	epoxide hydrolase 2(EPHX2)
LOC109071415	0.26078	-1.93909	0.00436763	0.10202	NP_001243412	EPHX2	epoxide hydrolase 2(EPHX2)
LOC109071498	0.17093	-2.54852	0.00374467	0.0960758	NP_001919	CFD	complement factor D(CFD)
LOC109071622	6.89417	2.78538	0.00309237	0.090726	NP_002323	LRP1	LDL receptor related protein 1(LRP1)
LOC109071932	4.88541	2.28848	0.00214976	0.0849606	NP_061881	MIEF1	mitochondrial elongation factor 1(MIEF1)
LOC109072579	5.34731	2.41881	0.00145583	0.080201	NP_061881	MIEF1	mitochondrial elongation factor 1(MIEF1)
LOC109072959	4.32545	2.11285	0.00419908	0.099889	NP_001009880	KIAA0930	KIAA0930(KIAA0930)
LOC109072961	3.69536	1.88572	0.00951242	0.139018	NP_001369649
LOC109073387	6.11671	2.61276	0.00221739	0.0849606	NP_079472	GRPEL1	GrpE like 1, mitochondrial(GRPEL1)
LOC109073421	0.255289	-1.9698	0.00363506	0.0960758	NP_056206	ANAPC13	anaphase promoting complex subunit 13(ANAPC13)
LOC109073557	7.11981	2.83184	0.00648788	0.120479	NP_066275	HPR	haptoglobin-related protein(HPR)
LOC109073716	13.777	3.78419	0.00101882	0.080201	NP_005389	PPP1R3C	protein phosphatase 1 regulatory subunit 3C(PPP1R3C)
LOC109073725	3.39198	1.76213	0.00788753	0.128645	XP_016872266	PCGF5	polycomb group ring finger 5(PCGF5)
LOC109073786	9.36515	3.2273	0.00195845	0.0841807
LOC109073985	2.82873	1.50015	0.00983801	0.139616	XP_011511531	B3GNT5	UDP-GlcNAc:betaGal beta-1,3-N-acetylglucosaminyltransferase 5(B3GNT5)
LOC109073986	3.26382	1.70656	0.0078282	0.128645	NP_001958	EIF4A2	eukaryotic translation initiation factor 4A2(EIF4A2)
LOC109074026	9.09689	3.18537	0.000743958	0.0794937	NP_001307660	ZBTB21	zinc finger and BTB domain containing 21(ZBTB21)
LOC109074141	145.165	7.18155	7.04e-05	0.0794937	NP_001243020	atf2	activating transcription factor 2(ATF2)
LOC109074224	5.55934	2.47491	0.00153348	0.0819281	NP_006797	btg3	BTG anti-proliferation factor 3(BTG3)
LOC109074537	3.7187	1.8948	0.00372568	0.0960758	NP_055889	KIF1B	kinesin family member 1B(KIF1B)
LOC109074594	4.43423	2.14868	0.00627117	0.11848	NP_001008213	OPTN	optineurin(OPTN)
LOC109074644	13.5649	3.76181	0.00126518	0.080201	NP_004408	DUSP1	dual specificity phosphatase 1(DUSP1)
LOC109074655	3.75732	1.9097	0.00414881	0.0997858	NP_055238	AFF4	AF4/FMR2 family member 4(AFF4)
LOC109074732	8.58888	3.10247	0.0020065	0.0841807	NP_001545	CYR61	cysteine rich angiogenic inducer 61(CYR61)
LOC109075024	12.9265	3.69226	0.00147655	0.080201	NP_056529	G0S2	G0/G1 switch 2(G0S2)
LOC109075297	0.0748915	-3.73905	0.000940572	0.0795672	NP_001229754	FDPS	farnesyl diphosphate synthase(FDPS)
LOC109076076	5.75671	2.52524	0.00992207	0.139871	NP_005338	HSPA5	heat shock protein family A (Hsp70) member 5(HSPA5)
LOC109076143	0.221649	-2.17365	0.0040181	0.0980899	NP_006234	PPP2R5A	protein phosphatase 2 regulatory subunit B'alpha(PPP2R5A)
LOC109076294	10.816	3.43509	0.00181104	0.0839088	NP_001317420	BNIP3L	BCL2 interacting protein 3 like(BNIP3L)
LOC109076348	5.52009	2.46469	0.00256804	0.0849606	NP_001231627	ZFP36L1	ZFP36 ring finger protein like 1(ZFP36L1)
LOC109077180	3.06225	1.61459	0.00737159	0.127448	NP_004055	CDKN1B	cyclin dependent kinase inhibitor 1B(CDKN1B)
LOC109077406	0.232804	-2.10281	0.00322834	0.090726	XP_016855976	CNST	consortin, connexin sorting protein(CNST)
LOC109077498	30.825	4.94603	0.000535471	0.0794937	XP_016868744	DDHD2	DDHD domain containing 2(DDHD2)
LOC109077505	3.66331	1.87315	0.00587266	0.115994	NP_001093122	GPR137C	G protein-coupled receptor 137C(GPR137C)
LOC109078013	16.2773	4.02479	0.0014509	0.080201	NP_006233	PPP1R3D	protein phosphatase 1 regulatory subunit 3D(PPP1R3D)
LOC109078178	151.684	7.24492	0.000101201	0.0794937	NP_061931	DDIT4	DNA damage inducible transcript 4(DDIT4)
LOC109078185	8.86729	3.14849	0.00132023	0.080201	NP_005121	fgfbp1	fibroblast growth factor binding protein 1(FGFBP1)
LOC109078257	32.4584	5.02052	0.000442295	0.0794937	NP_665857	CRYZL1	crystallin zeta like 1(CRYZL1)
LOC109078402	0.272749	-1.87435	0.00432686	0.101814	NP_036238	ARL2BP	ADP ribosylation factor like GTPase 2 binding protein(ARL2BP)
LOC109078945	6.71226	2.7468	0.00145174	0.080201	NP_001278675	REL	REL proto-oncogene, NF-kB subunit(REL)
LOC109079168	8.25738	3.04568	0.00192332	0.0841807	XP_006713277	SLC25A38	solute carrier family 25 member 38(SLC25A38)
LOC109079204	7.79196	2.96199	0.00253747	0.0849606	NP_001165094	VEGFA	vascular endothelial growth factor A(VEGFA)
LOC109079291	4.42147	2.14453	0.00512856	0.108888	NP_002582	PCK1	phosphoenolpyruvate carboxykinase 1(PCK1)
LOC109079369	7.22999	2.85399	0.00296806	0.0897284	NP_001306769	AACS	acetoacetyl-CoA synthetase(AACS)
LOC109079472	4.95013	2.30747	0.00233969	0.0849606	NP_002351	MAFK	MAF bZIP transcription factor K(MAFK)
LOC109079487	3.9456	1.98025	0.00509595	0.108888	NP_001269133	PCYT2	phosphate cytidylyltransferase 2, ethanolamine(PCYT2)
LOC109079839	4.59267	2.19933	0.00451169	0.102822	NP_060401	TTC38	tetratricopeptide repeat domain 38(TTC38)
LOC109080237	7.09664	2.82714	0.00311132	0.090726	NP_001161860	CITED2	Cbp/p300 interacting transactivator with Glu/Asp rich carboxy-terminal domain 2(CITED2)
LOC109080651	4.65607	2.21911	0.0031773	0.090726	NP_065881	WDFY1	WD repeat and FYVE domain containing 1(WDFY1)
LOC109080731	6.24016	2.64158	0.00503171	0.108888	NP_004855	GDF15	growth differentiation factor 15(GDF15)
LOC109081095	3.47592	1.7974	0.00751519	0.128489	XP_016873420	TOLLIP	toll interacting protein(TOLLIP)
LOC109081441	0.336445	-1.57156	0.00793582	0.128645	NP_001280738	GstT1	glutathione S-transferase theta 1(GSTT1)
LOC109081629	0.245689	-2.02509	0.00345335	0.0929153	XP_005265024	SCAP	SREBF chaperone(SCAP)
LOC109081813	3.9353	1.97647	0.0075932	0.128552	NP_000592	HGF	hepatocyte growth factor(HGF)
LOC109081905	0.317596	-1.65474	0.00906167	0.134611	NP_937790	ABHD15	abhydrolase domain containing 15(ABHD15)
LOC109082360	4.70217	2.23333	0.00780168	0.128645	NP_001792	CDO1	cysteine dioxygenase type 1(CDO1)
LOC109082370	4.94955	2.3073	0.00598218	0.116748	NP_001792	CDO1	cysteine dioxygenase type 1(CDO1)
LOC109082393	5.11644	2.35514	0.00493463	0.107813	NP_004466	FLOT2	flotillin 2(FLOT2)
LOC109082552	14.6069	3.86857	0.000541197	0.0794937	XP_016863296	PPM1K	protein phosphatase, Mg2+/Mn2+ dependent 1K(PPM1K)
LOC109082857	0.283294	-1.81963	0.00901618	0.134479	NP_055035	TM4SF1	transmembrane 4 L six family member 1(TM4SF1)
LOC109082959	3.24662	1.69894	0.00629917	0.118665	NP_001161792	TSPAN9	tetraspanin 9(TSPAN9)
LOC109083018	0.317063	-1.65716	0.00666445	0.12156
LOC109083134	8.50252	3.08789	0.00164361	0.0827545	NP_113600	GABARAPL1	GABA type A receptor associated protein like 1(GABARAPL1)
LOC109083135	6.30754	2.65708	0.0062158	0.118332	NP_001307488	CSRNP1	cysteine and serine rich nuclear protein 1(CSRNP1)
LOC109083139	6.95201	2.79743	0.00380543	0.0960758	NP_004152	RAB1A	RAB1A, member RAS oncogene family(RAB1A)
LOC109083207	4.01801	2.00648	0.00967038	0.139616	NP_001265174	ZFAND5	zinc finger AN1-type containing 5(ZFAND5)
LOC109083342	4.67489	2.22493	0.00998549	0.139871	NP_001272808	CEBPB	CCAAT/enhancer binding protein beta(CEBPB)
LOC109083639	3.27625	1.71204	0.00732509	0.126981	NP_001958	EIF4A2	eukaryotic translation initiation factor 4A2(EIF4A2)
LOC109083839	10.8519	3.43988	0.00199709	0.0841807	NP_443204	LRG1	leucine rich alpha-2-glycoprotein 1(LRG1)
LOC109083961	121.294	6.92237	8.53e-05	0.0794937
LOC109084201	6.96524	2.80017	0.000950652	0.0795672	XP_016875874	KLF12	Kruppel like factor 12(KLF12)
LOC109084277	19.9066	4.31518	0.000200948	0.0794937	NP_002351	MAFK	MAF bZIP transcription factor K(MAFK)
LOC109084339	4.94847	2.30698	0.00209539	0.084831	NP_001127911	PHLDB2	pleckstrin homology like domain family B member 2(PHLDB2)
LOC109084538	36.7851	5.20105	0.000359441	0.0794937	NP_005518	HSPA1L	heat shock protein family A (Hsp70) member 1 like(HSPA1L)
LOC109084975	3.83068	1.9376	0.00607935	0.117171	NP_002720	HHEX	hematopoietically expressed homeobox(HHEX)
LOC109084984	23.4054	4.54877	0.000448144	0.0794937	NP_775913	RIMKLA	ribosomal modification protein rimK like family member A(RIMKLA)
LOC109085393	5.22566	2.38561	0.00447645	0.102377	NP_001107592	DEPDC1	DEP domain containing 1(DEPDC1)
LOC109085598	7.29961	2.86782	0.000992422	0.080201	NP_061054	CAMK2N1	calcium/calmodulin dependent protein kinase II inhibitor 1(CAMK2N1)
LOC109085661	3.50849	1.81085	0.00460169	0.103703	NP_001192184	OCLN	occludin(OCLN)
LOC109085726	10.662	3.41441	0.00056205	0.0794937	XP_016867770	PRKAG2	protein kinase AMP-activated non-catalytic subunit gamma 2(PRKAG2)
LOC109085786	8.48205	3.08441	0.0057176	0.114669	NP_001186551	NCOA7	nuclear receptor coactivator 7(NCOA7)
LOC109085797	6.74807	2.75447	0.00218573	0.0849606	XP_005247182	CPOX	coproporphyrinogen oxidase(CPOX)
LOC109085968	4.99277	2.31984	0.00346401	0.0929153	XP_016863292	PPM1K	protein phosphatase, Mg2+/Mn2+ dependent 1K(PPM1K)
LOC109086009	4.97413	2.31444	0.00248573	0.0849606	XP_011517369	ARPC5L	actin related protein 2/3 complex subunit 5 like(ARPC5L)
LOC109086130	3.64125	1.86443	0.00693512	0.124184	NP_938009	HIPK1	homeodomain interacting protein kinase 1(HIPK1)
LOC109086145	4.24673	2.08635	0.00288532	0.0891823	NP_006268	ITSN2	intersectin 2(ITSN2)
LOC109086677	4.83838	2.27452	0.00819092	0.129584	NP_000282	PGK1	phosphoglycerate kinase 1(PGK1)
LOC109087274	7.282	2.86433	0.00201476	0.0841807	XP_006716890	PTPRD	protein tyrosine phosphatase, receptor type D(PTPRD)
LOC109087464	3.85996	1.94859	0.00482571	0.106263
LOC109087539	4.71441	2.23708	0.00599597	0.116748	NP_005309	H1F0	H1 histone family member 0(H1F0)
LOC109087549	6.05483	2.59809	0.00176384	0.0839088	NP_005309	H1F0	H1 histone family member 0(H1F0)
LOC109087738	8.70895	3.1225	0.00058578	0.0794937	NP_055179	GAPDHS	glyceraldehyde-3-phosphate dehydrogenase, spermatogenic(GAPDHS)
LOC109087745	6.52332	2.70561	0.000845918	0.0795672	NP_055179	GAPDHS	glyceraldehyde-3-phosphate dehydrogenase, spermatogenic(GAPDHS)
LOC109087858	12.1515	3.60306	0.00123463	0.080201	NP_001274117	ODC1	ornithine decarboxylase 1(ODC1)
LOC109087885	5.15267	2.36532	0.00491932	0.107813	NP_009055	UTRN	utrophin(UTRN)
LOC109088368	5.64598	2.49722	0.00525635	0.10946	NP_001034444	SLC25A29	solute carrier family 25 member 29(SLC25A29)
LOC109088762	4.4013	2.13793	0.00740377	0.127666	NP_008877	SPTBN2	spectrin beta, non-erythrocytic 2(SPTBN2)
LOC109088789	22.3819	4.48426	0.000400968	0.0794937
LOC109089296	6.43261	2.6854	0.0013146	0.080201	NP_003661	BHLHE40	basic helix-loop-helix family member e40(BHLHE40)
LOC109089399	4.72447	2.24015	0.00228775	0.0849606	XP_016874734	GYS2	glycogen synthase 2(GYS2)
LOC109089599	3.37791	1.75613	0.00663896	0.12156	NP_004827	EIF2AK3	eukaryotic translation initiation factor 2 alpha kinase 3(EIF2AK3)
LOC109090069	0.171493	-2.54378	0.00753036	0.128489	XP_016883112	HRH3	histamine receptor H3(HRH3)
LOC109090079	3.44191	1.78321	0.0074742	0.128202	NP_002395	MFAP4	microfibrillar associated protein 4(MFAP4)
LOC109090194	14.4461	3.85261	0.000626836	0.0794937	NP_001138569	SKIL	SKI like proto-oncogene(SKIL)
LOC109090421	11.178	3.48259	0.0018593	0.0841807	NP_001273897	jund	JunD proto-oncogene, AP-1 transcription factor subunit(JUND)
LOC109090748	5.34392	2.4179	0.00264693	0.0861838	XP_011529889	ANTXR2	anthrax toxin receptor 2(ANTXR2)
LOC109090796	0.23603	-2.08296	0.00882854	0.134262	NP_057218	CPQ	carboxypeptidase Q(CPQ)
LOC109091325	5.34416	2.41796	0.00461396	0.103703	NP_001265281	ACO1	aconitase 1(ACO1)
LOC109091339	25.434	4.66869	0.000237465	0.0794937	NP_009215	TWF2	twinfilin actin binding protein 2(TWF2)
LOC109091354	13.9348	3.80062	0.00112247	0.080201	NP_001257437	TNFAIP3	TNF alpha induced protein 3(TNFAIP3)
LOC109091408	0.0735725	-3.76469	0.000735058	0.0794937	NP_057455	HSD17B7	hydroxysteroid 17-beta dehydrogenase 7(HSD17B7)
LOC109091540	5.81829	2.5406	0.00574168	0.114798	NP_001304065	PFKFB4	6-phosphofructo-2-kinase/fructose-2,6-biphosphatase 4(PFKFB4)
LOC109091556	5.07461	2.3433	0.00553433	0.112576	XP_011540599	NR0B2	nuclear receptor subfamily 0 group B member 2(NR0B2)
LOC109091678	0.279494	-1.83911	0.00816346	0.129584	NP_002807	PSMD12	proteasome 26S subunit, non-ATPase 12(PSMD12)
LOC109091806	0.171744	-2.54167	0.00241562	0.0849606	XP_016872971	EML3	echinoderm microtubule associated protein like 3(EML3)
LOC109091983	7.40298	2.88811	0.00324688	0.090726	NP_001276929	NFIL3	nuclear factor, interleukin 3 regulated(NFIL3)
LOC109092119	4.04424	2.01587	0.00793411	0.128645	NP_001273295	MAP7D1	MAP7 domain containing 1(MAP7D1)
LOC109092246	7.33657	2.87511	0.00166322	0.0827545	NP_001265174	ZFAND5	zinc finger AN1-type containing 5(ZFAND5)
LOC109092250	6.27614	2.64988	0.00531494	0.109997	NP_001276929	NFIL3	nuclear factor, interleukin 3 regulated(NFIL3)
LOC109092410	4.09175	2.03272	0.0098913	0.139851	NP_001186883	ACTG1	actin gamma 1(ACTG1)
LOC109092411	3.86274	1.94962	0.00459395	0.103703
LOC109092450	10.1184	3.33891	0.00160607	0.0827545	NP_061063	SLC16A10	solute carrier family 16 member 10(SLC16A10)
LOC109092469	7.92574	2.98655	0.00181515	0.0839088	NP_006832	SLC38A3	solute carrier family 38 member 3(SLC38A3)
LOC109092551	0.204049	-2.29301	0.00165897	0.0827545	NP_001308073	CIDEC	cell death inducing DFFA like effector c(CIDEC)
LOC109092553	7.16265	2.84049	0.00246304	0.0849606	NP_005054	SCD	stearoyl-CoA desaturase(SCD)
LOC109092604	4.46561	2.15886	0.00373586	0.0960758	XP_016866734	UTRN	utrophin(UTRN)
LOC109092734	0.126434	-2.98355	0.00318825	0.090726	NP_001317287	MTHFR	methylenetetrahydrofolate reductase(MTHFR)
LOC109093429	0.215028	-2.2174	0.00636338	0.118878	NP_996805	CRIP3	cysteine rich protein 3(CRIP3)
LOC109093435	0.19117	-2.38708	0.00382166	0.0960758	NP_848509	PAQR7	progestin and adipoQ receptor family member 7(PAQR7)
LOC109093715	5.0626	2.33988	0.00282169	0.0884221	NP_001271267	NEDD4	neural precursor cell expressed, developmentally down-regulated 4, E3 ubiquitin protein ligase(NEDD4)
LOC109094047	16.7036	4.06209	0.000249528	0.0794937	NP_063938	CYP26B1	cytochrome P450 family 26 subfamily B member 1(CYP26B1)
LOC109094139	7.3952	2.88659	0.00137393	0.080201	NP_542164	OSBPL1A	oxysterol binding protein like 1A(OSBPL1A)
LOC109094231	5.5086	2.46169	0.0046698	0.104597	NP_005309	H1F0	H1 histone family member 0(H1F0)
LOC109094313	4.63189	2.2116	0.00231078	0.0849606	NP_005309	H1F0	H1 histone family member 0(H1F0)
LOC109094849	3.51921	1.81525	0.00518028	0.108888	NP_003822	RIOK3	RIO kinase 3(RIOK3)
LOC109095141	6.93497	2.79389	0.00243908	0.0849606	NP_003661	BHLHE40	basic helix-loop-helix family member e40(BHLHE40)
LOC109095202	8.70596	3.122	0.0013067	0.080201	XP_016875231	PXN	paxillin(PXN)
LOC109095250	4.03921	2.01407	0.00866858	0.13303	NP_001258925	CREB3L3	cAMP responsive element binding protein 3 like 3(CREB3L3)
LOC109095252	16.9012	4.07905	0.00122665	0.080201	NP_006696	GADD45G	growth arrest and DNA damage inducible gamma(GADD45G)
LOC109095370	2.91394	1.54297	0.00982397	0.139616	NP_067037	ABHD17C	abhydrolase domain containing 17C(ABHD17C)
LOC109095407	5.51697	2.46387	0.00163845	0.0827545	NP_060257	WBP1L	WW domain binding protein 1-like(WBP1L)
LOC109095557	0.209143	-2.25744	0.00275691	0.0876326
LOC109095593	3.23326	1.69299	0.00722576	0.125593	NP_001340926
LOC109095914	3.54748	1.82679	0.00706278	0.12496
LOC109095927	3.94933	1.98161	0.00811055	0.129584	NP_001274267	CAB39L	calcium binding protein 39 like(CAB39L)
LOC109096073	5.80832	2.53812	0.00314035	0.090726	XP_011531008	PSME4	proteasome activator subunit 4(PSME4)
LOC109096117	13.0233	3.70302	0.000305731	0.0794937	XP_016875972	LRCH1	leucine rich repeats and calponin homology domain containing 1(LRCH1)
LOC109096406	0.0746013	-3.74465	0.000919086	0.0795672	NP_001365086
LOC109096506	0.24517	-2.02814	0.00868945	0.13303	NP_001372793
LOC109096545	13.2254	3.72524	0.00196714	0.0841807	NP_001193997	BZW1	basic leucine zipper and W2 domains 1(BZW1)
LOC109096748	3.36751	1.75168	0.00506079	0.108888	NP_079423	COQ10B	coenzyme Q10B(COQ10B)
LOC109096791	3.50379	1.80892	0.00622704	0.118332	XP_024305174
LOC109097019	11.4407	3.5161	0.000949052	0.0795672	NP_001230106	ALDOA	aldolase, fructose-bisphosphate A(ALDOA)
LOC109097302	5.12721	2.35817	0.00664599	0.12156	NP_004322	BNIP3L	BCL2 interacting protein 3 like(BNIP3L)
LOC109097464	4.33511	2.11607	0.00325712	0.090726	NP_001011513	PDLIM5	PDZ and LIM domain 5(PDLIM5)
LOC109097723	4.86986	2.28388	0.00580047	0.115267	NP_003349	UGCG	UDP-glucose ceramide glucosyltransferase(UGCG)
LOC109097783	16.9302	4.08153	0.000786627	0.0795672	NP_001300893	DNAJB1	DnaJ heat shock protein family (Hsp40) member B1(DNAJB1)
LOC109097800	3.34448	1.74178	0.00780146	0.128645	NP_114143	TBC1D10A	TBC1 domain family member 10A(TBC1D10A)
LOC109097871	2.81326	1.49224	0.00972434	0.139616	NP_001159584	PNPLA6	patatin like phospholipase domain containing 6(PNPLA6)
LOC109097963	0.0844076	-3.56648	0.000417806	0.0794937	NP_003264	TM7SF2	transmembrane 7 superfamily member 2(TM7SF2)
LOC109097984	0.0679005	-3.88043	0.000717944	0.0794937	NP_003264	TM7SF2	transmembrane 7 superfamily member 2(TM7SF2)
LOC109098089	7.47713	2.90249	0.00145703	0.080201	NP_001307660	ZBTB21	zinc finger and BTB domain containing 21(ZBTB21)
LOC109098333	3.90424	1.96504	0.00680567	0.122879	NP_006609	KDM5B	lysine demethylase 5B(KDM5B)
LOC109098537	7.10652	2.82914	0.00653481	0.121005	NP_000322	SAA1	serum amyloid A1(SAA1)
LOC109098582	6.45735	2.69094	0.0015908	0.0827545	NP_005953	MXI1	MAX interactor 1, dimerization protein(MXI1)
LOC109098604	3.76969	1.91445	0.00400707	0.0980899	NP_002061	GNAI2	G protein subunit alpha i2(GNAI2)
LOC109098862	4.15469	2.05474	0.00306704	0.090726	NP_002198	ITGA9	integrin subunit alpha 9(ITGA9)
LOC109098887	18.8926	4.23975	0.000496483	0.0794937	NP_005156	ALDOC	aldolase, fructose-bisphosphate C(ALDOC)
LOC109099225	11.0965	3.47203	0.00289512	0.0891823	NP_001419	ENO1	enolase 1(ENO1)
LOC109099387	4.27208	2.09494	0.00299966	0.0897284	NP_000205	JAG1	jagged 1(JAG1)
LOC109099476	8.75267	3.12972	0.00118789	0.080201	NP_006500	RELB	RELB proto-oncogene, NF-kB subunit(RELB)
LOC109099682	19.1155	4.25667	0.000427304	0.0794937	XP_011527279	SDC4	syndecan 4(SDC4)
LOC109100072	6.86659	2.77959	0.0010289	0.080201
LOC109100107	3.378	1.75617	0.00870591	0.13303	NP_005389	PPP1R3C	protein phosphatase 1 regulatory subunit 3C(PPP1R3C)
LOC109100396	3.49116	1.80371	0.00662328	0.12156	NP_000867	IGF2R	insulin like growth factor 2 receptor(IGF2R)
LOC109100594	6.45643	2.69074	0.00258088	0.0849606	NP_005428	NCOA4	nuclear receptor coactivator 4(NCOA4)
LOC109100680	5.17784	2.37235	0.00446284	0.102377	NP_002080	CXCL2	C-X-C motif chemokine ligand 2(CXCL2)
LOC109100813	3.65801	1.87106	0.00766626	0.128645	NP_066952	PPA1	pyrophosphatase (inorganic) 1(PPA1)
LOC109100829	2.91868	1.54531	0.00974098	0.139616	XP_005263215	FNIP2	folliculin interacting protein 2(FNIP2)
LOC109101115	0.264745	-1.91732	0.00519719	0.108888	XP_016871674	MALRD1	MAM and LDL receptor class A domain containing 1(MALRD1)
LOC109101213	8.45069	3.07907	0.000702902	0.0794937	NP_942147	PHLDB3	pleckstrin homology like domain family B member 3(PHLDB3)
LOC109101578	8.30236	3.05352	0.00174828	0.0839088	NP_004411	DUSP8	dual specificity phosphatase 8(DUSP8)
LOC109101931	5.27827	2.40007	0.00494571	0.107813	NP_001276719	GPI	glucose-6-phosphate isomerase(GPI)
LOC109101932	5.38398	2.42867	0.00563193	0.11365	NP_001276719	GPI	glucose-6-phosphate isomerase(GPI)
LOC109102300	3.90887	1.96675	0.00335669	0.0924848	NP_055986	XPO6	exportin 6(XPO6)
LOC109102357	14.3811	3.8461	0.000882655	0.0795672	NP_001184249	MCL1	BCL2 family apoptosis regulator(MCL1)
LOC109102363	3.52982	1.8196	0.00685754	0.123474	NP_002578	PCDH1	protocadherin 1(PCDH1)
LOC109102398	5.40855	2.43524	0.00365672	0.0960758	NP_001371692
LOC109102628	0.261067	-1.93751	0.00985325	0.139616	NP_667339	ZNRF2	zinc and ring finger 2(ZNRF2)
LOC109103188	3.13189	1.64703	0.00888061	0.134479	NP_056006	SIK2	salt inducible kinase 2(SIK2)
LOC109103231	0.0819025	-3.60995	0.00318573	0.090726	NP_000473	APOA4	apolipoprotein A4(APOA4)
LOC109103423	10.7929	3.43201	0.00135172	0.080201	NP_001098117	SLC25A36	solute carrier family 25 member 36(SLC25A36)
LOC109103773	11.4983	3.52334	0.00129517	0.080201	NP_851397	HIF1A	hypoxia inducible factor 1 alpha subunit(HIF1A)
LOC109103981	5.64211	2.49623	0.00383242	0.0960758	NP_001307852	JAK1	Janus kinase 1(JAK1)
LOC109104270	5.06948	2.34184	0.00375488	0.0960758	NP_001748	CBR1	carbonyl reductase 1(CBR1)
LOC109104343	3.64686	1.86665	0.00426082	0.100623	NP_002301	LIFR	leukemia inhibitory factor receptor alpha(LIFR)
LOC109104646	6.60558	2.72369	0.00236582	0.0849606	NP_001276929	NFIL3	nuclear factor, interleukin 3 regulated(NFIL3)
LOC109104786	124.39	6.95873	0.000175556	0.0794937	NP_061130	ZNF395	zinc finger protein 395(ZNF395)
LOC109104846	5.79379	2.53451	0.00221762	0.0849606	NP_116000	PTP4A3	protein tyrosine phosphatase type IVA, member 3(PTP4A3)
LOC109104873	0.295092	-1.76077	0.00785613	0.128645	NP_060518	MAGOHB	mago homolog B, exon junction complex core component(MAGOHB)
LOC109104899	3.56048	1.83207	0.00624714	0.118369	NP_036466	MYO10	myosin X(MYO10)
LOC109104999	4.26529	2.09264	0.00717335	0.125351	NP_001161860	CITED2	Cbp/p300 interacting transactivator with Glu/Asp rich carboxy-terminal domain 2(CITED2)
LOC109105172	6.94748	2.79649	0.00127525	0.080201	NP_073592	IPPK	inositol-pentakisphosphate 2-kinase(IPPK)
LOC109105243	6.5625	2.71424	0.0018549	0.0841807	NP_001722	BTG1	BTG anti-proliferation factor 1(BTG1)
LOC109105433	3.80849	1.92922	0.0089904	0.134479	NP_004359	CNN2	calponin 2(CNN2)
LOC109105796	3.35031	1.74429	0.00720135	0.125504	NP_877439	MACC1	MACC1, MET transcriptional regulator(MACC1)
LOC109105814	4.59369	2.19965	0.00864734	0.13303	NP_001368872
LOC109105940	6.72264	2.74903	0.00273683	0.0874444	NP_001171470	SLC34A2	solute carrier family 34 member 2(SLC34A2)
LOC109105991	11.5776	3.53326	0.000907673	0.0795672	NP_068779	MCL1	BCL2 family apoptosis regulator(MCL1)
LOC109106121	0.309302	-1.69291	0.00868581	0.13303	NP_001309345	PNISR	PNN interacting serine and arginine rich protein(PNISR)
LOC109106168	7.92114	2.98571	0.00302737	0.0901022	XP_016857180	PNRC2	proline rich nuclear receptor coactivator 2(PNRC2)
LOC109106501	4.43646	2.14941	0.00504443	0.108888	NP_065821	CGN	cingulin(CGN)
LOC109106603	0.333062	-1.58614	0.00817552	0.129584	NP_001373857
LOC109106607	136.951	7.09751	0.000209823	0.0794937	NP_001186550	NCOA7	nuclear receptor coactivator 7(NCOA7)
LOC109106889	33.6307	5.07171	0.000371879	0.0794937	NP_055399	ERO1A	endoplasmic reticulum oxidoreductase 1 alpha(ERO1A)
LOC109107006	4.51743	2.1755	0.00251578	0.0849606	NP_001307852	JAK1	Janus kinase 1(JAK1)
LOC109107034	0.0865651	-3.53007	0.00419582	0.099889	NP_001171187	KLF11	Kruppel like factor 11(KLF11)
LOC109107148	3.41777	1.77306	0.0084783	0.13284	NP_001003698	RREB1	ras responsive element binding protein 1(RREB1)
LOC109107242	4.89274	2.29064	0.00610291	0.117171	NP_116193	ADO	2-aminoethanethiol dioxygenase(ADO)
LOC109107585	3.40375	1.76712	0.0053159	0.109997	XP_024308705
LOC109107655	5.79072	2.53374	0.00366886	0.0960758	XP_024301883
LOC109107943	7.64528	2.93457	0.00139098	0.080201	NP_055275	CSDC2	cold shock domain containing C2(CSDC2)
LOC109108003	0.222476	-2.16828	0.00205753	0.0843456
LOC109108057	3.13561	1.64875	0.00979983	0.139616	XP_016877054	ARID4A	AT-rich interaction domain 4A(ARID4A)
LOC109108134	4.79305	2.26095	0.00280778	0.0884112	NP_219494	CIPC	CLOCK interacting pacemaker(CIPC)
LOC109108189	6.3754	2.67252	0.00168225	0.0830677	NP_002145	HSPA4	heat shock protein family A (Hsp70) member 4(HSPA4)
LOC109108375	47.2007	5.56074	0.000182679	0.0794937	NP_002667	PMM1	phosphomannomutase 1(PMM1)
LOC109108708	4.35405	2.12236	0.00900601	0.134479	NP_001307667	FAM107B	family with sequence similarity 107 member B(FAM107B)
LOC109108741	7.45759	2.89871	0.00234005	0.0849606	NP_001317145	CNP	2',3'-cyclic nucleotide 3' phosphodiesterase(CNP)
LOC109109056	3.65822	1.87114	0.00441388	0.10202	XP_005256293	MTSS1L	MTSS1L, I-BAR domain containing(MTSS1L)
LOC109109104	3.78827	1.92154	0.00570303	0.114669	NP_003496	FZD1	frizzled class receptor 1(FZD1)
LOC109109143	7.18126	2.84424	0.00213723	0.0849606	NP_001171647	TIPARP	TCDD inducible poly(ADP-ribose) polymerase(TIPARP)
LOC109109161	0.234731	-2.09092	0.00979517	0.139616	NP_001289755	CYB5R2	cytochrome b5 reductase 2(CYB5R2)
LOC109109260	24.3948	4.6085	0.000250647	0.0794937	NP_001252509	FAM13A	family with sequence similarity 13 member A(FAM13A)
LOC109109444	3.95016	1.98191	0.00843388	0.132463	NP_001093138	HIGD1A	HIG1 hypoxia inducible domain family member 1A(HIGD1A)
LOC109109593	0.277437	-1.84977	0.00601175	0.116748	NP_015565	cyb5r3	cytochrome b5 reductase 3(CYB5R3)
LOC109110063	14.905	3.89773	0.0010423	0.080201	NP_004408	DUSP1	dual specificity phosphatase 1(DUSP1)
LOC109110100	6.88555	2.78357	0.00152848	0.0819281	NP_001171647	TIPARP	TCDD inducible poly(ADP-ribose) polymerase(TIPARP)
LOC109110124	5.85745	2.55027	0.00249722	0.0849606	NP_005985	TBX2	T-box 2(TBX2)
LOC109110189	0.246609	-2.0197	0.00603393	0.116748	NP_569732	TSPAN17	tetraspanin 17(TSPAN17)
LOC109110226	3.81186	1.9305	0.00785035	0.128645	XP_016866733	UTRN	utrophin(UTRN)
LOC109110269	4.66339	2.22138	0.00220037	0.0849606	NP_002383	MDM2	MDM2 proto-oncogene(MDM2)
LOC109110277	6.54589	2.71059	0.00379357	0.0960758	NP_001161860	CITED2	Cbp/p300 interacting transactivator with Glu/Asp rich carboxy-terminal domain 2(CITED2)
LOC109110334	54.2658	5.76197	0.000305796	0.0794937	NP_000616	NOS2	nitric oxide synthase 2(NOS2)
LOC109110565	7.29442	2.86679	0.00128657	0.080201	NP_003364	VCL	vinculin(VCL)
LOC109110840	3.00844	1.58901	0.00792365	0.128645	XP_024304715
LOC109110864	7.41142	2.88975	0.004083	0.0992906	NP_116182	MFSD2A	major facilitator superfamily domain containing 2A(MFSD2A)
LOC109110935	0.0969856	-3.36609	0.0011759	0.080201	NP_006570	EBP	emopamil binding protein (sterol isomerase)(EBP)
LOC109111186	0.285415	-1.80886	0.00897101	0.134479	NP_001012410	SGO1	shugoshin 1(SGO1)
LOC109111460	0.103485	-3.27251	0.00144788	0.080201	NP_001020127	SC5D	sterol-C5-desaturase(SC5D)
LOC109111491	0.15113	-2.72614	0.0025383	0.0849606	NP_006264	CCL7	C-C motif chemokine ligand 7(CCL7)
LOC109111619	4.54889	2.18551	0.0074516	0.128152	NP_001361775
LOC109111637	4.39841	2.13698	0.00343377	0.0928684	NP_699172	RNF19B	ring finger protein 19B(RNF19B)
LOC109111642	4.43093	2.14761	0.00863062	0.13303	NP_001356789
LOC109111698	4.30233	2.10512	0.00299351	0.0897284	NP_116000	PTP4A3	protein tyrosine phosphatase type IVA, member 3(PTP4A3)
LOC109111706	8.39445	3.06943	0.00129315	0.080201	NP_001017926	ZHX1	zinc fingers and homeoboxes 1(ZHX1)
LOC109111832	0.104613	-3.25687	0.00146845	0.080201	NP_000777	CYP51A1	cytochrome P450 family 51 subfamily A member 1(CYP51A1)
LOC109111989	4.94496	2.30596	0.00263718	0.0861838	XP_011512857	hivep1	human immunodeficiency virus type I enhancer binding protein 1(HIVEP1)
LOC109112073	4.96663	2.31227	0.00289686	0.0891823	NP_001372905
LOC109112176	4.83712	2.27415	0.0070976	0.125033	NP_009151	CA5B	carbonic anhydrase 5B(CA5B)
LOC109112177	7.37268	2.88219	0.0052103	0.108888	NP_071504	PC	pyruvate carboxylase(PC)
LOC109112178	5.98402	2.58112	0.00399477	0.0980899	NP_071504	PC	pyruvate carboxylase(PC)
LOC109112409	8.21523	3.0383	0.0009097	0.0795672	XP_011512855	hivep1	human immunodeficiency virus type I enhancer binding protein 1(HIVEP1)
LOC109112877	9.94893	3.31454	0.00114663	0.080201	NP_001248356	LPIN1	lipin 1(LPIN1)
LOC109113210	4.74024	2.24496	0.00759077	0.128552	NP_054798	KLF15	Kruppel like factor 15(KLF15)
LOC109113360	5.07435	2.34322	0.00679671	0.122879	NP_002219	JUN	Jun proto-oncogene, AP-1 transcription factor subunit(JUN)
LOC109113363	9.31916	3.2202	0.0022032	0.0849606	NP_002219	JUN	Jun proto-oncogene, AP-1 transcription factor subunit(JUN)
LOC109113581	15.1666	3.92282	0.000445437	0.0794937	NP_003740	IRS2	insulin receptor substrate 2(IRS2)
LOC109113598	8.35714	3.06301	0.00216915	0.0849606	NP_002094	GYS1	glycogen synthase 1(GYS1)
LOC109113683	4.91472	2.29711	0.00181482	0.0839088	NP_001101	ADAM10	ADAM metallopeptidase domain 10(ADAM10)
lss	0.111306	-3.1674	0.00140611	0.080201	NP_001001438	LSS	lanosterol synthase (2,3-oxidosqualene-lanosterol cyclase)(LSS)
mtf2	0.247139	-2.0166	0.00270142	0.0867383	NP_031384	MTF2	metal response element binding transcription factor 2(MTF2)
nadk	4.88928	2.28962	0.00777428	0.128645	NP_001340570
nit1	0.29448	-1.76376	0.00792752	0.128645	NP_001172021	NIT1	nitrilase 1(NIT1)
ppp2cb	4.50598	2.17184	0.00702441	0.12496	NP_001009552	PPP2CB	protein phosphatase 2 catalytic subunit beta(PPP2CB)
psph	0.164883	-2.60049	0.00636799	0.118878	NP_001357449
rep15	0.114615	-3.12513	0.000604095	0.0794937	NP_001025045	REP15	RAB15 effector protein(REP15)
slc26a5	5.81479	2.53973	0.00507688	0.108888	NP_945350	SLC26A5	solute carrier family 26 member 5(SLC26A5)
slc2a1	10.512	3.39396	0.000593867	0.0794937	NP_006507	SLC2A1	solute carrier family 2 member 1(SLC2A1)
triqk	0.220462	-2.1814	0.00267093	0.0861838	NP_001165270	triqk	triple QxxK/R motif containing(TRIQK)
uprt	5.08567	2.34644	0.00242933	0.0849606	NP_659489	UPRT	uracil phosphoribosyltransferase homolog(UPRT)
zmynd12	10.6595	3.41407	0.000595458	0.0794937	NP_115633	ZMYND12	zinc finger MYND-type containing 12(ZMYND12)

## Sheet: Liver
Sequence_id	Fold Change	logFC	p-value	FDR	Refseq	Gene_symbol	Gene_Name
bckdk	0.276009	-1.85721	0.00742173	0.104702	NP_005872	BCKDK	branched chain ketoacid dehydrogenase kinase(BCKDK)
bcl2l1	8.16972	3.03029	0.00182078	0.0667519	NP_001309171	BCL2L1	BCL2 like 1(BCL2L1)
brox	4.73685	2.24393	0.00254171	0.071239	XP_006711236	BROX	BRO1 domain and CAAX motif containing(BROX)
c25h10orf10	81.2978	6.34514	0.000166248	0.0551102	NP_008952	C10orf10	chromosome 10 open reading frame 10(C10orf10)
casc4	0.305624	-1.71017	0.0059542	0.0942686	NP_612432	CASC4	cancer susceptibility candidate 4(CASC4)
ccng2	9.43145	3.23748	0.00114102	0.0591917	NP_004345	CCNG2	cyclin G2(CCNG2)
cdc42bpb	4.33555	2.11622	0.00560106	0.0927841	NP_006026	CDC42BPB	CDC42 binding protein kinase beta(CDC42BPB)
cemip	4.90137	2.29318	0.0034016	0.0773604	NP_001280227	cemip	cell migration inducing hyaluronan binding protein(CEMIP)
comtd1	0.240646	-2.05502	0.00395012	0.0800059	NP_653190	COMTD1	catechol-O-methyltransferase domain containing 1(COMTD1)
csad	0.1135	-3.13924	0.00759277	0.105759	NP_057073	CSAD	cysteine sulfinic acid decarboxylase(CSAD)
cunh14orf180	0.245982	-2.02338	0.0059867	0.0945053	NP_694972	NPHP3	nephrocystin 3(NPHP3)
cunh14orf28	3.67861	1.87916	0.00576795	0.0938213	NP_001017923	c14orf28	chromosome 14 open reading frame 28(C14orf28)
dapk3	18.131	4.18039	0.000777264	0.0551102	NP_001362587	-	-
dgcr14	3.57728	1.83886	0.0067425	0.100746	NP_073210	DGCR14	DiGeorge syndrome critical region gene 14(DGCR14)
fbxo25	5.06296	2.33998	0.00456142	0.0843047	NP_904357	FBXO25	F-box protein 25(FBXO25)
gldc	5.77633	2.53015	0.0040884	0.0800268	NP_000161	GLDC	glycine decarboxylase(GLDC)
grhl1	0.0219862	-5.50726	0.000672854	0.0551102	XP_006711945	GRHL1	grainyhead like transcription factor 1(GRHL1)
hdac5	3.67969	1.87958	0.00478551	0.0861177	XP_005256962	HDAC5	histone deacetylase 5(HDAC5)
hif1an	5.9502	2.57294	0.00230553	0.0684417	NP_060372	HIF1AN	hypoxia inducible factor 1 alpha subunit inhibitor(HIF1AN)
hopx	6.02461	2.59087	0.00269867	0.0731925	NP_631957	HOPX	HOP homeobox(HOPX)
klf12	14.562	3.86413	0.000763314	0.0551102	XP_016875873	KLF12	Kruppel like factor 12(KLF12)
LOC109045144	0.10722	-3.22136	0.000854294	0.0551102	-	-	-
LOC109045183	0.139189	-2.84488	0.00368303	0.0792583	NP_001188258	PPP1R3B	protein phosphatase 1 regulatory subunit 3B(PPP1R3B)
LOC109045217	4.19957	2.07024	0.00321482	0.0754134	NP_057609	UBAP1	ubiquitin associated protein 1(UBAP1)
LOC109045478	3.27957	1.71351	0.00905737	0.115293	XP_016864732	ELL2	elongation factor for RNA polymerase II 2(ELL2)
LOC109045786	7.71286	2.94727	0.00205453	0.0675002	NP_443203	LEAP2	liver enriched antimicrobial peptide 2(LEAP2)
LOC109045842	0.26164	-1.93435	0.00820289	0.10915	NP_005073	TRIM25	tripartite motif containing 25(TRIM25)
LOC109045912	4.26167	2.09142	0.00831699	0.110057	NP_003480	NRIP1	nuclear receptor interacting protein 1(NRIP1)
LOC109046132	4.66165	2.22084	0.00407731	0.0800268	NP_001365861	-	-
LOC109046467	4.51434	2.17451	0.0041037	0.0800268	NP_001350382	-	-
LOC109046528	24.7273	4.62803	0.00037865	0.0551102	NP_068370	NR1D1	nuclear receptor subfamily 1 group D member 1(NR1D1)
LOC109046541	13.3979	3.74393	0.000397962	0.0551102	XP_011526291	INSR	insulin receptor(INSR)
LOC109046759	7.88183	2.97853	0.00235494	0.0689924	NP_001248332	NFKB2	nuclear factor kappa B subunit 2(NFKB2)
LOC109047177	7.27608	2.86316	0.00158593	0.0644847	NP_001722	BTG1	BTG anti-proliferation factor 1(BTG1)
LOC109047202	5.45614	2.44788	0.00181095	0.0667519	NP_001116857	BCOR	BCL6 corepressor(BCOR)
LOC109047414	5.28384	2.40159	0.00226376	0.0675002	NP_005737	NAMPT	nicotinamide phosphoribosyltransferase(NAMPT)
LOC109047426	7.0249	2.81248	0.00110753	0.0591917	NP_001278930	SRF	serum response factor(SRF)
LOC109047590	12.0163	3.58693	0.000842763	0.0551102	NP_001340275	-	-
LOC109047935	4.94368	2.30558	0.00661497	0.100746	NP_775873	DIP2B	disco interacting protein 2 homolog B(DIP2B)
LOC109048035	9.39473	3.23185	0.00178592	0.0662408	NP_001121132	MFN2	mitofusin 2(MFN2)
LOC109048049	369.055	8.52769	7.95e-05	0.0551102	NP_071356	EGLN3	egl-9 family hypoxia inducible factor 3(EGLN3)
LOC109048052	5.51203	2.46258	0.00209882	0.0675002	NP_612145	SPTSSA	serine palmitoyltransferase small subunit A(SPTSSA)
LOC109048069	8.557	3.0971	0.00815393	0.10915	XP_011540502	CPTP	ceramide-1-phosphate transfer protein(CPTP)
LOC109048214	5.52656	2.46638	0.00316675	0.0751709	XP_011540502	CPTP	ceramide-1-phosphate transfer protein(CPTP)
LOC109048368	5.97444	2.5788	0.00178169	0.0662408	NP_000293	PLOD1	procollagen-lysine,2-oxoglutarate 5-dioxygenase 1(PLOD1)
LOC109048372	123.969	6.95383	0.000106361	0.0551102	NP_071334	EGLN1	egl-9 family hypoxia inducible factor 1(EGLN1)
LOC109048698	0.223442	-2.16203	0.00373314	0.0792583	NP_005759	LPCAT3	lysophosphatidylcholine acyltransferase 3(LPCAT3)
LOC109048749	4.24372	2.08533	0.00433093	0.0814531	NP_004701	SYNGR2	synaptogyrin 2(SYNGR2)
LOC109048903	25.96	4.69822	0.000411459	0.0551102	NP_001291	KLF6	Kruppel like factor 6(KLF6)
LOC109048905	21.0697	4.3971	0.000574373	0.0551102	NP_001291	KLF6	Kruppel like factor 6(KLF6)
LOC109048927	3.07957	1.62273	0.0089118	0.114102	NP_001106653	BRD2	bromodomain containing 2(BRD2)
LOC109048959	13.7734	3.78381	0.000995822	0.0573012	NP_068779	MCL1	BCL2 family apoptosis regulator(MCL1)
LOC109048999	5.04776	2.33564	0.00232542	0.0687279	NP_874389	CREM	cAMP responsive element modulator(CREM)
LOC109049059	5.44998	2.44625	0.00382797	0.0798798	XP_016862499	BDH1	3-hydroxybutyrate dehydrogenase, type 1(BDH1)
LOC109049077	4.28801	2.10031	0.00536225	0.0899383	NP_004573	RABGGTB	Rab geranylgeranyltransferase beta subunit(RABGGTB)
LOC109049313	3.60724	1.8509	0.00770998	0.106652	NP_573441	EPS8L1	EPS8 like 1(EPS8L1)
LOC109049340	0.212582	-2.23391	0.00439102	0.0820594	XP_016878731	abcc1	ATP binding cassette subfamily C member 1(ABCC1)
LOC109049349	3.85303	1.94599	0.00372759	0.0792583	NP_874389	CREM	cAMP responsive element modulator(CREM)
LOC109049368	0.0962645	-3.37685	0.00219188	0.0675002	XP_024303748	-	-
LOC109049468	4.04656	2.0167	0.0040333	0.0800268	NP_001073888	UNK	unkempt family zinc finger(UNK)
LOC109049746	0.205487	-2.28288	0.00400174	0.0800268	NP_001138302	FMO5	flavin containing monooxygenase 5(FMO5)
LOC109050206	0.157883	-2.66308	0.00200179	0.0672455	XP_016856291	FMO5	flavin containing monooxygenase 5(FMO5)
LOC109050338	3.40528	1.76777	0.00941511	0.115693	NP_005219	EGFR	epidermal growth factor receptor(EGFR)
LOC109050533	6.82573	2.77098	0.00291627	0.0745936	NP_001186310	RNF145	ring finger protein 145(RNF145)
LOC109050616	4.93765	2.30382	0.00514841	0.0899383	NP_001032242	FOXK1	forkhead box K1(FOXK1)
LOC109050692	7.19686	2.84737	0.00226002	0.0675002	NP_001816	CKMT2	creatine kinase, mitochondrial 2(CKMT2)
LOC109050707	4.80784	2.26539	0.00567499	0.0935467	NP_085150	KDM7A	lysine demethylase 7A(KDM7A)
LOC109051125	4.22271	2.07817	0.00975064	0.117657	NP_077282	FA2H	fatty acid 2-hydroxylase(FA2H)
LOC109051144	0.110577	-3.17688	0.000631516	0.0551102	XP_005273819	CPT1A	carnitine palmitoyltransferase 1A(CPT1A)
LOC109051193	5.77983	2.53103	0.00517943	0.0899383	NP_001138897	NR1D2	nuclear receptor subfamily 1 group D member 2(NR1D2)
LOC109051412	0.298059	-1.74633	0.00920979	0.115404	NP_001373857	-	-
LOC109051662	0.156487	-2.67588	0.00245736	0.0704549	NP_008826	HNMT	histamine N-methyltransferase(HNMT)
LOC109051748	7.51603	2.90997	0.00817513	0.10915	NP_001158504	RNF182	ring finger protein 182(RNF182)
LOC109051770	8.88091	3.15071	0.00395915	0.0800059	NP_001357266	-	-
LOC109051819	0.0999873	-3.32211	0.000691322	0.0551102	NP_036461	MMD	monocyte to macrophage differentiation associated(MMD)
LOC109051881	6.79953	2.76543	0.00405793	0.0800268	NP_001186883	ACTG1	actin gamma 1(ACTG1)
LOC109051886	3.52938	1.81941	0.00682913	0.100746	NP_112196	TRMT1L	tRNA methyltransferase 1 like(TRMT1L)
LOC109052152	55.4881	5.79411	0.00016759	0.0551102	NP_057419	PRODH	proline dehydrogenase 1(PRODH)
LOC109052358	9.05134	3.17813	0.00124307	0.0609716	XP_005250008	GIMAP8	GTPase, IMAP family member 8(GIMAP8)
LOC109052440	13.692	3.77526	0.000758683	0.0551102	NP_036272	SLC25A10	solute carrier family 25 member 10(SLC25A10)
LOC109052557	121.947	6.93012	0.000106	0.0551102	NP_055275	CSDC2	cold shock domain containing C2(CSDC2)
LOC109052560	5.65526	2.49959	0.00287179	0.0745936	NP_065390	NFKBIA	NFKB inhibitor alpha(NFKBIA)
LOC109052602	17.6635	4.1427	0.000658707	0.0551102	NP_002990	SDC4	syndecan 4(SDC4)
LOC109052677	7.99543	2.99918	0.00114695	0.0591917	NP_000043	ATP7A	ATPase copper transporting alpha(ATP7A)
LOC109052787	11.2975	3.49793	0.000981865	0.0573012	NP_001156731	FAM63A	family with sequence similarity 63 member A(FAM63A)
LOC109052891	7.88794	2.97965	0.000954514	0.0571771	NP_055429	PSME4	proteasome activator subunit 4(PSME4)
LOC109052951	3.1559	1.65805	0.00925671	0.115434	NP_001280627	SEPT9	septin 9(SEPT9)
LOC109052977	3.92903	1.97417	0.00520332	0.0899383	NP_001335122	-	-
LOC109053002	3.26197	1.70575	0.00907358	0.115293	NP_005466	SH2B3	SH2B adaptor protein 3(SH2B3)
LOC109053018	8.36295	3.06401	0.00165769	0.0647425	NP_006460	IVNS1ABP	influenza virus NS1A binding protein(IVNS1ABP)
LOC109053148	6.56551	2.71491	0.00301599	0.0745936	NP_002351	MAFK	MAF bZIP transcription factor K(MAFK)
LOC109053168	12.4562	3.63879	0.000563525	0.0551102	NP_001193880	SLC16A3	solute carrier family 16 member 3(SLC16A3)
LOC109053175	0.159134	-2.65169	0.0039291	0.0798798	NP_001316360	TP53INP2	tumor protein p53 inducible nuclear protein 2(TP53INP2)
LOC109053382	30.8739	4.94832	0.00022381	0.0551102	NP_004411	DUSP8	dual specificity phosphatase 8(DUSP8)
LOC109053498	4.18615	2.06563	0.00424467	0.0803094	NP_056412	GPSM1	G-protein signaling modulator 1(GPSM1)
LOC109053681	5.51611	2.46365	0.00537661	0.0899543	NP_005339	HSP90AA1	heat shock protein 90 alpha family class A member 1(HSP90AA1)
LOC109053699	26.8279	4.74566	0.000619476	0.0551102	NP_001231627	ZFP36L1	ZFP36 ring finger protein like 1(ZFP36L1)
LOC109053760	19.222	4.26468	0.000547814	0.0551102	NP_001665	ATF3	activating transcription factor 3(ATF3)
LOC109053821	9.45903	3.24169	0.00262947	0.0720044	XP_016864712	F2RL1	F2R like trypsin receptor 1(F2RL1)
LOC109053861	9.14432	3.19288	0.000839054	0.0551102	XP_016878683	EEF2K	eukaryotic elongation factor 2 kinase(EEF2K)
LOC109053888	0.25489	-1.97205	0.00416948	0.080152	NP_201569	CDC14A	cell division cycle 14A(CDC14A)
LOC109053947	12.2998	3.62056	0.000428907	0.0551102	NP_005188	FOXN3	forkhead box N3(FOXN3)
LOC109053990	4.20801	2.07314	0.00889003	0.114041	XP_011527690	ACSS1	acyl-CoA synthetase short-chain family member 1(ACSS1)
LOC109053993	10.2573	3.35858	0.000487702	0.0551102	NP_060834	RSBN1	round spermatid basic protein 1(RSBN1)
LOC109054172	9.25611	3.21041	0.000763689	0.0551102	NP_055714	RHOBTB3	Rho related BTB domain containing 3(RHOBTB3)
LOC109054176	4.1102	2.03921	0.00312583	0.0751709	NP_057609	UBAP1	ubiquitin associated protein 1(UBAP1)
LOC109054541	4.39335	2.13532	0.00677012	0.100746	NP_001180412	LIMS1	LIM zinc finger domain containing 1(LIMS1)
LOC109054751	3.58073	1.84025	0.00617721	0.0963789	NP_005900	MAP1B	microtubule associated protein 1B(MAP1B)
LOC109054829	4.30783	2.10696	0.0049957	0.0886671	NP_477515	UBE2J2	ubiquitin conjugating enzyme E2 J2(UBE2J2)
LOC109055045	7.11846	2.83157	0.00319328	0.0751709	NP_001354354	-	-
LOC109055222	7.89048	2.98011	0.00271083	0.0731925	NP_002189	IRF1	interferon regulatory factor 1(IRF1)
LOC109055307	5.24391	2.39064	0.00219162	0.0675002	NP_001306768	AACS	acetoacetyl-CoA synthetase(AACS)
LOC109055393	30.2704	4.91984	0.000182912	0.0551102	NP_001017962	P4HA1	prolyl 4-hydroxylase subunit alpha 1(P4HA1)
LOC109055459	8.83025	3.14245	0.000826083	0.0551102	NP_000350	TGM1	transglutaminase 1(TGM1)
LOC109055515	4.39576	2.13611	0.0073211	0.103993	NP_001612	AHR	aryl hydrocarbon receptor(AHR)
LOC109055586	9.2914	3.2159	0.000640229	0.0551102	NP_001161860	CITED2	Cbp/p300 interacting transactivator with Glu/Asp rich carboxy-terminal domain 2(CITED2)
LOC109055784	6.66389	2.73637	0.00144499	0.0625446	XP_016869244	SPAG1	sperm associated antigen 1(SPAG1)
LOC109055787	5.19523	2.37719	0.00254831	0.071239	NP_001340766	-	-
LOC109055798	0.304913	-1.71353	0.00705775	0.102255	NP_001369506	-	-
LOC109055864	3.56474	1.8338	0.00778587	0.107056	NP_001365932	-	-
LOC109055999	3.34223	1.74081	0.0067499	0.100746	NP_001032242	FOXK1	forkhead box K1(FOXK1)
LOC109056102	10.8355	3.4377	0.000419863	0.0551102	NP_060372	HIF1AN	hypoxia inducible factor 1 alpha subunit inhibitor(HIF1AN)
LOC109056125	6.59342	2.72103	0.00130735	0.0612814	NP_003611	PPM1D	protein phosphatase, Mg2+/Mn2+ dependent 1D(PPM1D)
LOC109056139	6.82596	2.77103	0.00163719	0.0647425	NP_001159933	MPP1	membrane palmitoylated protein 1(MPP1)
LOC109056147	0.15447	-2.6946	0.00477243	0.0861177	NP_055577	DHCR24	24-dehydrocholesterol reductase(DHCR24)
LOC109056360	4.73346	2.24289	0.00725402	0.103768	NP_647475	ANGPTL4	angiopoietin like 4(ANGPTL4)
LOC109056524	3.46997	1.79492	0.00801563	0.108203	-	-	-
LOC109056668	12.7055	3.66739	0.000468894	0.0551102	NP_006507	SLC2A1	solute carrier family 2 member 1(SLC2A1)
LOC109056673	97.4484	6.60657	0.000207385	0.0551102	NP_006507	SLC2A1	solute carrier family 2 member 1(SLC2A1)
LOC109056719	4.82995	2.27201	0.00676702	0.100746	NP_001092	ACTB	actin beta(ACTB)
LOC109056773	0.146872	-2.76737	0.00414425	0.080126	NP_004382	CYP8B1	cytochrome P450 family 8 subfamily B member 1(CYP8B1)
LOC109057161	9.47753	3.24451	0.00315675	0.0751709	NP_005518	HSPA1L	heat shock protein family A (Hsp70) member 1 like(HSPA1L)
LOC109057281	4.93416	2.3028	0.00575307	0.0938213	-	-	-
LOC109057293	3.88339	1.95732	0.00821308	0.10915	NP_073728	PER2	period circadian clock 2(PER2)
LOC109057320	8.3217	3.05688	0.00348633	0.0782264	NP_001041629	SLC7A3	solute carrier family 7 member 3(SLC7A3)
LOC109057352	0.207227	-2.27072	0.00373222	0.0792583	NP_113665	YPEL3	yippee like 3(YPEL3)
LOC109057745	3.39067	1.76157	0.00743004	0.104702	NP_001339718	-	-
LOC109057804	47.7497	5.57742	0.000335831	0.0551102	NP_001157704	DDHD2	DDHD domain containing 2(DDHD2)
LOC109057953	4.63621	2.21295	0.00761386	0.105759	NP_001273200	HMOX2	heme oxygenase 2(HMOX2)
LOC109058034	26.7765	4.7429	0.000254253	0.0551102	NP_064706	MNT	MAX network transcriptional repressor(MNT)
LOC109058049	0.213494	-2.22773	0.00646566	0.099635	XP_005264324	EML4	echinoderm microtubule associated protein like 4(EML4)
LOC109058092	3.38217	1.75795	0.00794482	0.107821	NP_002244	KDR	kinase insert domain receptor(KDR)
LOC109058272	5.09556	2.34924	0.00595426	0.0942686	NP_001341743	-	-
LOC109058285	4.19451	2.0685	0.00460822	0.0849355	NP_085150	KDM7A	lysine demethylase 7A(KDM7A)
LOC109058441	3.50213	1.80823	0.00479655	0.0861177	NP_071898	rnf25	ring finger protein 25(RNF25)
LOC109058450	0.225171	-2.15091	0.00731729	0.103993	-	-	-
LOC109059373	13.5377	3.75891	0.00133546	0.0612814	NP_001558	INPPL1	inositol polyphosphate phosphatase like 1(INPPL1)
LOC109059395	4.2472	2.08651	0.00399073	0.0800268	NP_112240	ARPC5L	actin related protein 2/3 complex subunit 5 like(ARPC5L)
LOC109059699	4.41859	2.14359	0.00420869	0.0803094	NP_001294931	MEF2C	myocyte enhancer factor 2C(MEF2C)
LOC109059703	8.80126	3.13771	0.000783948	0.0551102	NP_065852	ARRDC3	arrestin domain containing 3(ARRDC3)
LOC109060127	3.333	1.73682	0.00967951	0.117432	NP_001304995	SEC24D	SEC24 homolog D, COPII coat complex component(SEC24D)
LOC109060553	4.97901	2.31586	0.00488781	0.0872137	NP_065891	FNIP2	folliculin interacting protein 2(FNIP2)
LOC109060558	8.93343	3.15921	0.000852991	0.0551102	NP_932076	NME7	NME/NM23 family member 7(NME7)
LOC109060581	12.2899	3.6194	0.000947445	0.0571771	NP_001668	ATP1B1	ATPase Na+/K+ transporting subunit beta 1(ATP1B1)
LOC109060671	5.48816	2.45632	0.00237632	0.069245	-	-	-
LOC109060735	3.60158	1.84863	0.00922363	0.115404	NP_005198	CRKL	CRK like proto-oncogene, adaptor protein(CRKL)
LOC109061070	4.60684	2.20378	0.00570454	0.0936648	NP_001349712	-	-
LOC109061189	0.253905	-1.97764	0.00481355	0.0861177	-	-	-
LOC109061233	5.08057	2.34499	0.00286237	0.0745936	NP_001073285	INSR	insulin receptor(INSR)
LOC109061326	6.3296	2.66211	0.00262209	0.0720044	NP_001640	SHROOM2	shroom family member 2(SHROOM2)
LOC109061682	6.10702	2.61047	0.00361099	0.0789125	NP_002060	GNAI1	G protein subunit alpha i1(GNAI1)
LOC109061683	5.42142	2.43867	0.00455467	0.0843047	-	-	-
LOC109061691	3.11954	1.64133	0.00853685	0.111863	NP_006085	DLC1	DLC1 Rho GTPase activating protein(DLC1)
LOC109061719	3.93634	1.97685	0.00683444	0.100746	XP_005249021	ANKS1A	ankyrin repeat and sterile alpha motif domain containing 1A(ANKS1A)
LOC109062096	0.18264	-2.45292	0.00535435	0.0899383	NP_683878	PANK1	pantothenate kinase 1(PANK1)
LOC109062323	9.30433	3.2179	0.000999291	0.0573012	NP_001128711	LDHA	lactate dehydrogenase A(LDHA)
LOC109062325	4.54716	2.18497	0.00422112	0.0803094	NP_001128711	LDHA	lactate dehydrogenase A(LDHA)
LOC109062808	11.0918	3.47142	0.00152869	0.0636283	XP_016859590	eml6	echinoderm microtubule associated protein like 6(EML6)
LOC109062881	4.48636	2.16554	0.00861447	0.112441	NP_000161	GLDC	glycine decarboxylase(GLDC)
LOC109062905	9.72554	3.28178	0.00153641	0.0636283	NP_001017926	ZHX1	zinc fingers and homeoboxes 1(ZHX1)
LOC109062968	3.70451	1.88928	0.00827061	0.109659	XP_011527207	ACSS2	acyl-CoA synthetase short-chain family member 2(ACSS2)
LOC109063083	17.547	4.13316	0.00684721	0.100746	NP_002582	PCK1	phosphoenolpyruvate carboxykinase 1(PCK1)
LOC109063226	3.61728	1.85491	0.00592895	0.0942686	NP_620116	BAX	BCL2 associated X, apoptosis regulator(BAX)
LOC109063298	5.4664	2.45059	0.00253396	0.071239	NP_001338963	-	-
LOC109063541	4.2543	2.08892	0.00532215	0.0899383	NP_001356789	-	-
LOC109063580	4.38874	2.13381	0.00577328	0.0938213	NP_002060	GNAI1	G protein subunit alpha i1(GNAI1)
LOC109063656	3.40225	1.76649	0.00944199	0.115695	NP_001121696	TMCC1	transmembrane and coiled-coil domain family 1(TMCC1)
LOC109063673	6.72346	2.7492	0.00162879	0.0647425	NP_065390	NFKBIA	NFKB inhibitor alpha(NFKBIA)
LOC109063739	19.2349	4.26565	0.000371611	0.0551102	NP_001193726	PKM	pyruvate kinase, muscle(PKM)
LOC109063801	4.69609	2.23146	0.00708729	0.102255	NP_071334	EGLN1	egl-9 family hypoxia inducible factor 1(EGLN1)
LOC109063836	11.058	3.46702	0.00119629	0.0605244	NP_006136	DNAJB1	DnaJ heat shock protein family (Hsp40) member B1(DNAJB1)
LOC109063875	0.107657	-3.21549	0.00389515	0.0798798	NP_000518	LDLR	low density lipoprotein receptor(LDLR)
LOC109063920	4.1949	2.06864	0.00475945	0.0861177	NP_001317145	CNP	2',3'-cyclic nucleotide 3' phosphodiesterase(CNP)
LOC109064067	5.29641	2.40501	0.00468404	0.0853946	NP_001138367	CD209	CD209 molecule(CD209)
LOC109064220	0.214672	-2.2198	0.00695609	0.101896	NP_003271	TNNC1	troponin C1, slow skeletal and cardiac type(TNNC1)
LOC109064247	4.54282	2.18359	0.00777918	0.107056	NP_066272	PDLIM1	PDZ and LIM domain 1(PDLIM1)
LOC109064256	6.8997	2.78653	0.00198603	0.0672455	NP_006725	HIVEP2	human immunodeficiency virus type I enhancer binding protein 2(HIVEP2)
LOC109064451	4.53871	2.18228	0.00357646	0.0784134	NP_003811	TNFRSF14	TNF receptor superfamily member 14(TNFRSF14)
LOC109064551	0.106232	-3.23472	0.00125888	0.0612016	NP_006789	ugt2a1	UDP glucuronosyltransferase family 2 member A1 complex locus(UGT2A1)
LOC109064947	0.258271	-1.95304	0.00391302	0.0798798	NP_060481	ARGLU1	arginine and glutamate rich 1(ARGLU1)
LOC109065047	5.54964	2.47239	0.00514784	0.0899383	NP_001353387	-	-
LOC109065151	5.78771	2.53299	0.00210129	0.0675002	NP_001026855	TP53BP2	tumor protein p53 binding protein 2(TP53BP2)
LOC109065320	8.90023	3.15384	0.000679675	0.0551102	XP_016880385	NUFIP2	NUFIP2, FMR1 interacting protein 2(NUFIP2)
LOC109065336	11.6008	3.53615	0.00101983	0.0579836	NP_001252507	FAM13A	family with sequence similarity 13 member A(FAM13A)
LOC109065360	6.25711	2.6455	0.0016836	0.0647963	XP_016864388	LOC100506514	uncharacterized LOC100506514(LOC100506514)
LOC109065510	10.7564	3.42712	0.00390574	0.0798798	NP_061130	ZNF395	zinc finger protein 395(ZNF395)
LOC109065707	5.27375	2.39883	0.00515609	0.0899383	NP_001106177	SCIN	scinderin(SCIN)
LOC109065879	4.16077	2.05685	0.0038351	0.0798798	NP_976072	SLC23A2	solute carrier family 23 member 2(SLC23A2)
LOC109065938	6.52776	2.70659	0.00208521	0.0675002	NP_001165095	VEGFA	vascular endothelial growth factor A(VEGFA)
LOC109066003	0.170935	-2.54848	0.00165982	0.0647425	NP_001186608	TMEM56	transmembrane protein 56(TMEM56)
LOC109066047	4.09964	2.0355	0.0052386	0.0899383	NP_001159586	PNPLA6	patatin like phospholipase domain containing 6(PNPLA6)
LOC109066267	0.255205	-1.97027	0.00492405	0.0876272	NP_569732	TSPAN17	tetraspanin 17(TSPAN17)
LOC109066302	9.7715	3.28858	0.00385674	0.0798798	NP_054862	CD274	CD274 molecule(CD274)
LOC109066551	4.98732	2.31826	0.00481086	0.0861177	NP_001265281	ACO1	aconitase 1(ACO1)
LOC109066737	5.44761	2.44562	0.00436746	0.0818471	NP_002607	PER1	period circadian clock 1(PER1)
LOC109067100	7.91165	2.98398	0.00115986	0.0594008	NP_064706	MNT	MAX network transcriptional repressor(MNT)
LOC109067315	0.208459	-2.26217	0.00833891	0.11008	NP_008875	SPP2	secreted phosphoprotein 2(SPP2)
LOC109067437	4.60302	2.20258	0.00718133	0.102948	NP_001155901	PDCD6IP	programmed cell death 6 interacting protein(PDCD6IP)
LOC109067900	5.30725	2.40796	0.00389942	0.0798798	NP_004678	MTMR4	myotubularin related protein 4(MTMR4)
LOC109067975	0.0216738	-5.52791	0.000464527	0.0551102	NP_009057	VCP	valosin containing protein(VCP)
LOC109068184	6.19959	2.63217	0.00189711	0.0672455	NP_061881	MIEF1	mitochondrial elongation factor 1(MIEF1)
LOC109068256	15.1263	3.91899	0.000842459	0.0551102	NP_001269071	TFE3	transcription factor binding to IGHM enhancer 3(TFE3)
LOC109068350	12.1904	3.60767	0.0020311	0.0675002	NP_001035787	UEVLD	UEV and lactate/malate dehyrogenase domains(UEVLD)
LOC109068513	6.64888	2.73311	0.00296628	0.0745936	NP_001138870	TEF	TEF, PAR bZIP transcription factor(TEF)
LOC109068772	0.235763	-2.08459	0.00530688	0.0899383	XP_024308975	-	-
LOC109068950	27.9708	4.80585	0.00109706	0.0591917	-	-	-
LOC109069178	6.41349	2.68111	0.00295794	0.0745936	NP_001186311	RNF145	ring finger protein 145(RNF145)
LOC109069435	0.236247	-2.08163	0.00595765	0.0942686	XP_011512246	SUB1	SUB1 homolog, transcriptional regulator(SUB1)
LOC109069551	8.51984	3.09083	0.000978653	0.0573012	NP_002094	GYS1	glycogen synthase 1(GYS1)
LOC109069654	9.04512	3.17714	0.00216143	0.0675002	NP_001020775	ARRDC2	arrestin domain containing 2(ARRDC2)
LOC109070134	4.33797	2.11702	0.00998958	0.119041	-	-	-
LOC109070211	15.0057	3.90744	0.000661254	0.0551102	NP_001184249	MCL1	BCL2 family apoptosis regulator(MCL1)
LOC109070735	27.206	4.76585	0.000561552	0.0551102	NP_005400	CXCL11	C-X-C motif chemokine ligand 11(CXCL11)
LOC109070789	5.05295	2.33713	0.00283085	0.0745936	NP_001036189	NECTIN2	nectin cell adhesion molecule 2(NECTIN2)
LOC109070992	4.64361	2.21525	0.00256158	0.0713098	NP_115805	LZTS2	leucine zipper tumor suppressor 2(LZTS2)
LOC109071096	41.4399	5.37295	0.000201609	0.0551102	NP_951009	MKNK2	MAP kinase interacting serine/threonine kinase 2(MKNK2)
LOC109071097	0.245846	-2.02417	0.00467333	0.0853946	NP_060481	ARGLU1	arginine and glutamate rich 1(ARGLU1)
LOC109071202	10.1285	3.34035	0.00105201	0.0591917	NP_001304913	SLC27A6	solute carrier family 27 member 6(SLC27A6)
LOC109071412	0.192227	-2.37912	0.00392013	0.0798798	NP_001243412	EPHX2	epoxide hydrolase 2(EPHX2)
LOC109071415	0.254877	-1.97213	0.0040775	0.0800268	NP_001243412	EPHX2	epoxide hydrolase 2(EPHX2)
LOC109071498	0.196503	-2.34738	0.0054239	0.0905197	NP_001919	CFD	complement factor D(CFD)
LOC109071577	3.39774	1.76457	0.00666682	0.100746	XP_016872335	FBXO18	F-box protein, helicase, 18(FBXO18)
LOC109071932	5.68876	2.50811	0.00157309	0.0643527	NP_061881	MIEF1	mitochondrial elongation factor 1(MIEF1)
LOC109072578	4.06589	2.02357	0.00412718	0.0800268	NP_004074	DDIT3	DNA damage inducible transcript 3(DDIT3)
LOC109072579	6.33505	2.66336	0.001361	0.0612814	NP_061881	MIEF1	mitochondrial elongation factor 1(MIEF1)
LOC109072924	3.92062	1.97108	0.00647501	0.099635	NP_003381	WEE1	WEE1 G2 checkpoint kinase(WEE1)
LOC109072959	7.95026	2.991	0.00128906	0.0612814	NP_001009880	KIAA0930	KIAA0930(KIAA0930)
LOC109073135	0.29401	-1.76606	0.00769854	0.106652	NP_001032238	ACOT1	acyl-CoA thioesterase 1(ACOT1)
LOC109073260	4.33717	2.11676	0.00375021	0.0793696	NP_115910	PARD6B	par-6 family cell polarity regulator beta(PARD6B)
LOC109073280	4.85946	2.2808	0.00994078	0.118882	NP_001186883	ACTG1	actin gamma 1(ACTG1)
LOC109073387	8.43772	3.07685	0.00149227	0.063365	NP_079472	GRPEL1	GrpE like 1, mitochondrial(GRPEL1)
LOC109073636	33.3098	5.05788	0.000381059	0.0551102	NP_443096	TIFA	TRAF interacting protein with forkhead associated domain(TIFA)
LOC109073716	19.2588	4.26744	0.000566294	0.0551102	NP_005389	PPP1R3C	protein phosphatase 1 regulatory subunit 3C(PPP1R3C)
LOC109073725	3.98714	1.99535	0.00477351	0.0861177	XP_016872266	PCGF5	polycomb group ring finger 5(PCGF5)
LOC109073786	7.6175	2.92932	0.00213616	0.0675002	-	-	-
LOC109073986	3.69517	1.88564	0.00708447	0.102255	NP_001958	EIF4A2	eukaryotic translation initiation factor 4A2(EIF4A2)
LOC109074026	13.2948	3.73279	0.000695671	0.0551102	NP_001307660	ZBTB21	zinc finger and BTB domain containing 21(ZBTB21)
LOC109074102	15.3391	3.93914	0.00196183	0.0672455	NP_064515	c8orf4	chromosome 8 open reading frame 4(C8orf4)
LOC109074141	926.192	9.85517	3.92e-05	0.0551102	NP_001243020	atf2	activating transcription factor 2(ATF2)
LOC109074329	5.89266	2.55892	0.00168109	0.0647963	NP_037386	TBK1	TANK binding kinase 1(TBK1)
LOC109074594	5.23623	2.38853	0.00522927	0.0899383	NP_001008213	OPTN	optineurin(OPTN)
LOC109074644	13.4933	3.75418	0.000938482	0.0571771	NP_004408	DUSP1	dual specificity phosphatase 1(DUSP1)
LOC109074645	14.0911	3.81671	0.000370575	0.0551102	-	-	-
LOC109074655	4.09823	2.035	0.00352827	0.0782264	NP_055238	AFF4	AF4/FMR2 family member 4(AFF4)
LOC109074678	4.69886	2.23231	0.00297713	0.0745936	XP_011533312	FOXO1	forkhead box O1(FOXO1)
LOC109074732	9.24315	3.20838	0.00165684	0.0647425	NP_001545	CYR61	cysteine rich angiogenic inducer 61(CYR61)
LOC109075024	15.4624	3.9507	0.00112565	0.0591917	NP_056529	G0S2	G0/G1 switch 2(G0S2)
LOC109075297	0.133688	-2.90306	0.00350421	0.0782264	NP_001229754	FDPS	farnesyl diphosphate synthase(FDPS)
LOC109076076	6.88454	2.78336	0.00781866	0.107056	NP_005338	HSPA5	heat shock protein family A (Hsp70) member 5(HSPA5)
LOC109076143	0.255584	-1.96813	0.0053222	0.0899383	NP_006234	PPP2R5A	protein phosphatase 2 regulatory subunit B'alpha(PPP2R5A)
LOC109076162	0.123476	-3.0177	0.00692028	0.101593	NP_001039	SST	somatostatin(SST)
LOC109076294	8.6859	3.11868	0.00252284	0.071239	NP_001317420	BNIP3L	BCL2 interacting protein 3 like(BNIP3L)
LOC109076348	7.01299	2.81003	0.00244776	0.0704549	NP_001231627	ZFP36L1	ZFP36 ring finger protein like 1(ZFP36L1)
LOC109077180	3.39739	1.76443	0.00679558	0.100746	NP_004055	CDKN1B	cyclin dependent kinase inhibitor 1B(CDKN1B)
LOC109077406	0.214426	-2.22145	0.0037969	0.0798798	XP_016855976	CNST	consortin, connexin sorting protein(CNST)
LOC109077498	42.6031	5.41289	0.000293298	0.0551102	XP_016868744	DDHD2	DDHD domain containing 2(DDHD2)
LOC109077505	4.68012	2.22654	0.00309226	0.0751709	NP_001093122	GPR137C	G protein-coupled receptor 137C(GPR137C)
LOC109077896	3.2222	1.68804	0.0090394	0.115293	XP_005272021	AFF4	AF4/FMR2 family member 4(AFF4)
LOC109078178	141.118	7.14076	9.28e-05	0.0551102	NP_061931	DDIT4	DNA damage inducible transcript 4(DDIT4)
LOC109078185	14.7605	3.88367	0.0013077	0.0612814	NP_005121	fgfbp1	fibroblast growth factor binding protein 1(FGFBP1)
LOC109078257	23.797	4.57271	0.000434688	0.0551102	NP_665857	CRYZL1	crystallin zeta like 1(CRYZL1)
LOC109078402	0.244767	-2.03052	0.00402624	0.0800268	NP_036238	ARL2BP	ADP ribosylation factor like GTPase 2 binding protein(ARL2BP)
LOC109078439	0.115691	-3.11165	0.00465247	0.0852917	NP_055851	ENDOD1	endonuclease domain containing 1(ENDOD1)
LOC109078747	3.14241	1.65187	0.00961153	0.116818	NP_068378	AVPI1	arginine vasopressin induced 1(AVPI1)
LOC109078945	10.2428	3.35654	0.00129236	0.0612814	NP_001278675	REL	REL proto-oncogene, NF-kB subunit(REL)
LOC109079168	8.35847	3.06324	0.00273004	0.0732633	XP_006713277	SLC25A38	solute carrier family 25 member 38(SLC25A38)
LOC109079204	7.84736	2.97221	0.00260279	0.0718606	NP_001165094	VEGFA	vascular endothelial growth factor A(VEGFA)
LOC109079291	3.58116	1.84043	0.00910601	0.115371	NP_002582	PCK1	phosphoenolpyruvate carboxykinase 1(PCK1)
LOC109079369	10.5683	3.40167	0.00120811	0.0605244	NP_001306769	AACS	acetoacetyl-CoA synthetase(AACS)
LOC109079472	5.31162	2.40915	0.0039048	0.0798798	NP_002351	MAFK	MAF bZIP transcription factor K(MAFK)
LOC109079487	6.59014	2.72031	0.0013453	0.0612814	NP_001269133	PCYT2	phosphate cytidylyltransferase 2, ethanolamine(PCYT2)
LOC109079839	3.75368	1.90831	0.00735654	0.104124	NP_060401	TTC38	tetratricopeptide repeat domain 38(TTC38)
LOC109079979	4.53301	2.18047	0.00338879	0.0773604	XP_016863292	PPM1K	protein phosphatase, Mg2+/Mn2+ dependent 1K(PPM1K)
LOC109080237	10.242	3.35642	0.00151571	0.0635555	NP_001161860	CITED2	Cbp/p300 interacting transactivator with Glu/Asp rich carboxy-terminal domain 2(CITED2)
LOC109080651	3.43233	1.77919	0.00821125	0.10915	NP_065881	WDFY1	WD repeat and FYVE domain containing 1(WDFY1)
LOC109080731	6.78547	2.76245	0.00352271	0.0782264	NP_004855	GDF15	growth differentiation factor 15(GDF15)
LOC109080931	0.074079	-3.75479	0.00547203	0.090871	NP_005243	FOS	Fos proto-oncogene, AP-1 transcription factor subunit(FOS)
LOC109081095	3.7382	1.90234	0.00678495	0.100746	XP_016873420	TOLLIP	toll interacting protein(TOLLIP)
LOC109081441	0.270633	-1.88559	0.00782107	0.107056	NP_001280738	GstT1	glutathione S-transferase theta 1(GSTT1)
LOC109081813	4.00888	2.0032	0.00982068	0.11767	NP_000592	HGF	hepatocyte growth factor(HGF)
LOC109081862	4.77322	2.25496	0.00676969	0.100746	NP_005389	PPP1R3C	protein phosphatase 1 regulatory subunit 3C(PPP1R3C)
LOC109081905	0.20545	-2.28314	0.00220235	0.0675002	NP_937790	ABHD15	abhydrolase domain containing 15(ABHD15)
LOC109082279	4.28994	2.10096	0.00332212	0.0768556	NP_006460	IVNS1ABP	influenza virus NS1A binding protein(IVNS1ABP)
LOC109082393	5.04903	2.33601	0.00581107	0.0939433	NP_004466	FLOT2	flotillin 2(FLOT2)
LOC109082552	13.9902	3.80635	0.000527688	0.0551102	XP_016863296	PPM1K	protein phosphatase, Mg2+/Mn2+ dependent 1K(PPM1K)
LOC109082617	3.58201	1.84077	0.00871344	0.113073	NP_003306	DNAJC7	DnaJ heat shock protein family (Hsp40) member C7(DNAJC7)
LOC109082959	5.16491	2.36874	0.00248595	0.0709712	NP_001161792	TSPAN9	tetraspanin 9(TSPAN9)
LOC109083006	13.0912	3.71053	0.000565933	0.0551102	NP_001138569	SKIL	SKI like proto-oncogene(SKIL)
LOC109083018	0.259904	-1.94395	0.00422923	0.0803094	-	-	-
LOC109083029	4.05771	2.02066	0.00503457	0.0889826	NP_055621	RUSC2	RUN and SH3 domain containing 2(RUSC2)
LOC109083134	10.0602	3.33058	0.00139934	0.0621015	NP_113600	GABARAPL1	GABA type A receptor associated protein like 1(GABARAPL1)
LOC109083139	8.92883	3.15847	0.00192945	0.0672455	NP_004152	RAB1A	RAB1A, member RAS oncogene family(RAB1A)
LOC109083207	5.69572	2.50988	0.00445334	0.082791	NP_001265174	ZFAND5	zinc finger AN1-type containing 5(ZFAND5)
LOC109083342	5.15178	2.36507	0.00841216	0.110661	NP_001272808	CEBPB	CCAAT/enhancer binding protein beta(CEBPB)
LOC109083631	13.3932	3.74343	0.000639418	0.0551102	NP_001265174	ZFAND5	zinc finger AN1-type containing 5(ZFAND5)
LOC109083639	3.54545	1.82597	0.00751999	0.105547	NP_001958	EIF4A2	eukaryotic translation initiation factor 4A2(EIF4A2)
LOC109083839	13.2911	3.73239	0.00112132	0.0591917	NP_443204	LRG1	leucine rich alpha-2-glycoprotein 1(LRG1)
LOC109083868	5.71632	2.51509	0.00297363	0.0745936	NP_006473	DYRK2	dual specificity tyrosine phosphorylation regulated kinase 2(DYRK2)
LOC109083961	75.9856	6.24765	0.000133188	0.0551102	-	-	-
LOC109084201	7.52236	2.91119	0.000796456	0.0551102	XP_016875874	KLF12	Kruppel like factor 12(KLF12)
LOC109084277	28.4769	4.83172	0.000156719	0.0551102	NP_002351	MAFK	MAF bZIP transcription factor K(MAFK)
LOC109084339	4.80027	2.26312	0.00351108	0.0782264	NP_001127911	PHLDB2	pleckstrin homology like domain family B member 2(PHLDB2)
LOC109084527	0.223202	-2.16358	0.00866616	0.112677	NP_004351	CDH1	cadherin 1(CDH1)
LOC109084538	12.5458	3.64914	0.00257905	0.0714995	NP_005518	HSPA1L	heat shock protein family A (Hsp70) member 1 like(HSPA1L)
LOC109084698	6.30497	2.65649	0.00193068	0.0672455	XP_006718037	MFSD13A	major facilitator superfamily domain containing 13A(MFSD13A)
LOC109084713	59.1812	5.88707	0.000120231	0.0551102	NP_001193880	SLC16A3	solute carrier family 16 member 3(SLC16A3)
LOC109084975	3.77972	1.91828	0.00883785	0.114041	NP_002720	HHEX	hematopoietically expressed homeobox(HHEX)
LOC109084984	46.3582	5.53475	0.000214145	0.0551102	NP_775913	RIMKLA	ribosomal modification protein rimK like family member A(RIMKLA)
LOC109085393	4.84595	2.27678	0.00971557	0.117445	NP_001107592	DEPDC1	DEP domain containing 1(DEPDC1)
LOC109085598	11.7329	3.55248	0.000440252	0.0551102	NP_061054	CAMK2N1	calcium/calmodulin dependent protein kinase II inhibitor 1(CAMK2N1)
LOC109085626	0.204256	-2.29155	0.00878738	0.113812	NP_000473	APOA4	apolipoprotein A4(APOA4)
LOC109085661	3.88791	1.959	0.00419574	0.0803094	NP_001192184	OCLN	occludin(OCLN)
LOC109085726	8.3353	3.05923	0.00145976	0.0627636	XP_016867770	PRKAG2	protein kinase AMP-activated non-catalytic subunit gamma 2(PRKAG2)
LOC109085786	6.91083	2.78886	0.0065179	0.100065	NP_001186551	NCOA7	nuclear receptor coactivator 7(NCOA7)
LOC109085797	5.94672	2.5721	0.00410861	0.0800268	XP_005247182	CPOX	coproporphyrinogen oxidase(CPOX)
LOC109085865	90.5152	6.50009	0.000546566	0.0551102	NP_085143	DUSP16	dual specificity phosphatase 16(DUSP16)
LOC109085968	6.03062	2.59231	0.00337522	0.0773604	XP_016863292	PPM1K	protein phosphatase, Mg2+/Mn2+ dependent 1K(PPM1K)
LOC109086009	5.78763	2.53297	0.00278371	0.0741349	XP_011517369	ARPC5L	actin related protein 2/3 complex subunit 5 like(ARPC5L)
LOC109086130	3.471	1.79535	0.00982193	0.11767	NP_938009	HIPK1	homeodomain interacting protein kinase 1(HIPK1)
LOC109086145	4.84691	2.27706	0.00224755	0.0675002	NP_006268	ITSN2	intersectin 2(ITSN2)
LOC109086450	3.73853	1.90247	0.00941546	0.115693	XP_024309489	-	-
LOC109087274	5.72219	2.51657	0.0033104	0.0768494	XP_006716890	PTPRD	protein tyrosine phosphatase, receptor type D(PTPRD)
LOC109087464	4.64997	2.21722	0.00284062	0.0745936	-	-	-
LOC109087539	7.07294	2.82231	0.00219869	0.0675002	NP_005309	H1F0	H1 histone family member 0(H1F0)
LOC109087549	10.6857	3.41761	0.000654742	0.0551102	NP_005309	H1F0	H1 histone family member 0(H1F0)
LOC109087738	8.42217	3.07419	0.00107971	0.0591917	NP_055179	GAPDHS	glyceraldehyde-3-phosphate dehydrogenase, spermatogenic(GAPDHS)
LOC109087745	5.98303	2.58088	0.00185286	0.0672455	NP_055179	GAPDHS	glyceraldehyde-3-phosphate dehydrogenase, spermatogenic(GAPDHS)
LOC109087782	0.200278	-2.31992	0.00676841	0.100746	NP_004596	SULT2B1	sulfotransferase family 2B member 1(SULT2B1)
LOC109087858	24.3682	4.60693	0.000424065	0.0551102	NP_001274117	ODC1	ornithine decarboxylase 1(ODC1)
LOC109088789	24.8958	4.63783	0.000344518	0.0551102	-	-	-
LOC109089296	8.52364	3.09147	0.000907122	0.0568774	NP_003661	BHLHE40	basic helix-loop-helix family member e40(BHLHE40)
LOC109089399	3.21347	1.68413	0.0083516	0.11008	XP_016874734	GYS2	glycogen synthase 2(GYS2)
LOC109089599	3.55646	1.83044	0.00623731	0.0970907	NP_004827	EIF2AK3	eukaryotic translation initiation factor 2 alpha kinase 3(EIF2AK3)
LOC109089960	4.27486	2.09588	0.00306722	0.0751709	NP_000103	SLC26A2	solute carrier family 26 member 2(SLC26A2)
LOC109090079	3.69202	1.88441	0.00760483	0.105759	NP_002395	MFAP4	microfibrillar associated protein 4(MFAP4)
LOC109090176	5.87735	2.55517	0.00296695	0.0745936	NP_003814	TNFRSF6B	TNF receptor superfamily member 6b(TNFRSF6B)
LOC109090194	17.8733	4.15973	0.000600041	0.0551102	NP_001138569	SKIL	SKI like proto-oncogene(SKIL)
LOC109090372	0.255209	-1.97025	0.00715465	0.102785	NP_006032	HS3ST3B1	heparan sulfate-glucosamine 3-sulfotransferase 3B1(HS3ST3B1)
LOC109090421	10.2477	3.35724	0.00387019	0.0798798	NP_001273897	jund	JunD proto-oncogene, AP-1 transcription factor subunit(JUND)
LOC109090582	31.3798	4.97176	0.000774382	0.0551102	NP_064515	c8orf4	chromosome 8 open reading frame 4(C8orf4)
LOC109090724	4.98562	2.31777	0.00370229	0.0792583	NP_003892	SGPL1	sphingosine-1-phosphate lyase 1(SGPL1)
LOC109090748	6.86455	2.77917	0.00178709	0.0662408	XP_011529889	ANTXR2	anthrax toxin receptor 2(ANTXR2)
LOC109090796	0.219218	-2.18956	0.0090627	0.115293	NP_057218	CPQ	carboxypeptidase Q(CPQ)
LOC109091325	4.70203	2.23328	0.00670576	0.100746	NP_001265281	ACO1	aconitase 1(ACO1)
LOC109091339	26.0875	4.70529	0.000283565	0.0551102	NP_009215	TWF2	twinfilin actin binding protein 2(TWF2)
LOC109091353	10.9343	3.45078	0.00064246	0.0551102	NP_001257437	TNFAIP3	TNF alpha induced protein 3(TNFAIP3)
LOC109091354	18.6947	4.22455	0.000649481	0.0551102	NP_001257437	TNFAIP3	TNF alpha induced protein 3(TNFAIP3)
LOC109091408	0.105346	-3.2468	0.00194094	0.0672455	NP_057455	HSD17B7	hydroxysteroid 17-beta dehydrogenase 7(HSD17B7)
LOC109091540	4.90751	2.29499	0.00631809	0.0978939	NP_001304065	PFKFB4	6-phosphofructo-2-kinase/fructose-2,6-biphosphatase 4(PFKFB4)
LOC109091678	0.187071	-2.41834	0.00327318	0.0762492	NP_002807	PSMD12	proteasome 26S subunit, non-ATPase 12(PSMD12)
LOC109091806	0.146256	-2.77344	0.00220498	0.0675002	XP_016872971	EML3	echinoderm microtubule associated protein like 3(EML3)
LOC109092119	4.96909	2.31298	0.00684752	0.100746	NP_001273295	MAP7D1	MAP7 domain containing 1(MAP7D1)
LOC109092246	9.15765	3.19498	0.000848886	0.0551102	NP_001265174	ZFAND5	zinc finger AN1-type containing 5(ZFAND5)
LOC109092247	3.16005	1.65995	0.00730218	0.103993	NP_001265174	ZFAND5	zinc finger AN1-type containing 5(ZFAND5)
LOC109092410	4.42115	2.14442	0.00920471	0.115404	NP_001186883	ACTG1	actin gamma 1(ACTG1)
LOC109092450	8.08133	3.01459	0.00216194	0.0675002	NP_061063	SLC16A10	solute carrier family 16 member 10(SLC16A10)
LOC109092469	7.93305	2.98788	0.00188026	0.0672455	NP_006832	SLC38A3	solute carrier family 38 member 3(SLC38A3)
LOC109092553	6.7173	2.74788	0.00343094	0.0777642	NP_005054	SCD	stearoyl-CoA desaturase(SCD)
LOC109092734	0.124513	-3.00563	0.00311174	0.0751709	NP_001317287	MTHFR	methylenetetrahydrofolate reductase(MTHFR)
LOC109093034	9.6505	3.2706	0.00081876	0.0551102	NP_001287768	CIART	circadian associated repressor of transcription(CIART)
LOC109093429	0.175027	-2.51435	0.00302421	0.0745936	NP_996805	CRIP3	cysteine rich protein 3(CRIP3)
LOC109093435	0.236549	-2.07979	0.0070341	0.102255	NP_848509	PAQR7	progestin and adipoQ receptor family member 7(PAQR7)
LOC109093468	3.57048	1.83612	0.00886982	0.114041	NP_001239225	CEBPG	CCAAT/enhancer binding protein gamma(CEBPG)
LOC109093715	6.95921	2.79892	0.00223405	0.0675002	NP_001271267	NEDD4	neural precursor cell expressed, developmentally down-regulated 4, E3 ubiquitin protein ligase(NEDD4)
LOC109093827	0.170752	-2.55002	0.00744417	0.104702	NP_443203	LEAP2	liver enriched antimicrobial peptide 2(LEAP2)
LOC109094047	14.8485	3.89225	0.000360166	0.0551102	NP_063938	CYP26B1	cytochrome P450 family 26 subfamily B member 1(CYP26B1)
LOC109094139	5.35521	2.42094	0.00313788	0.0751709	NP_542164	OSBPL1A	oxysterol binding protein like 1A(OSBPL1A)
LOC109094231	7.10781	2.82941	0.00212723	0.0675002	NP_005309	H1F0	H1 histone family member 0(H1F0)
LOC109094295	9.76396	3.28747	0.000682268	0.0551102	NP_005309	H1F0	H1 histone family member 0(H1F0)
LOC109094313	9.4787	3.24469	0.000762267	0.0551102	NP_005309	H1F0	H1 histone family member 0(H1F0)
LOC109094849	4.42276	2.14495	0.00354462	0.0782264	NP_003822	RIOK3	RIO kinase 3(RIOK3)
LOC109095141	8.57747	3.10055	0.00161725	0.0647425	NP_003661	BHLHE40	basic helix-loop-helix family member e40(BHLHE40)
LOC109095165	3.74596	1.90533	0.00921801	0.115404	NP_001243239	GLS	glutaminase(GLS)
LOC109095202	10.9684	3.45528	0.000806808	0.0551102	XP_016875231	PXN	paxillin(PXN)
LOC109095240	4.7419	2.24547	0.00845227	0.110971	NP_001258925	CREB3L3	cAMP responsive element binding protein 3 like 3(CREB3L3)
LOC109095250	6.84755	2.77559	0.00318674	0.0751709	NP_001258925	CREB3L3	cAMP responsive element binding protein 3 like 3(CREB3L3)
LOC109095252	17.7006	4.14573	0.000663252	0.0551102	NP_006696	GADD45G	growth arrest and DNA damage inducible gamma(GADD45G)
LOC109095370	3.89393	1.96123	0.00636191	0.0983458	NP_067037	ABHD17C	abhydrolase domain containing 17C(ABHD17C)
LOC109095407	7.39866	2.88726	0.00150916	0.0635555	NP_060257	WBP1L	WW domain binding protein 1-like(WBP1L)
LOC109095557	0.227556	-2.13571	0.00528628	0.0899383	-	-	-
LOC109095927	5.03831	2.33294	0.0058717	0.0942686	NP_001274267	CAB39L	calcium binding protein 39 like(CAB39L)
LOC109096073	5.96374	2.57622	0.0033461	0.0771442	XP_011531008	PSME4	proteasome activator subunit 4(PSME4)
LOC109096117	19.1845	4.26187	0.000402596	0.0551102	XP_016875972	LRCH1	leucine rich repeats and calponin homology domain containing 1(LRCH1)
LOC109096406	0.0526102	-4.24851	0.00088803	0.0567409	NP_001365086	-	-
LOC109096545	10.5792	3.40315	0.00223886	0.0675002	NP_001193997	BZW1	basic leucine zipper and W2 domains 1(BZW1)
LOC109096791	3.21929	1.68674	0.00980023	0.11767	XP_024305174	-	-
LOC109096796	3.79354	1.92354	0.00912184	0.115371	NP_001092264	fam160a2	family with sequence similarity 160 member A2(FAM160A2)
LOC109097019	16.6406	4.05663	0.000596667	0.0551102	NP_001230106	ALDOA	aldolase, fructose-bisphosphate A(ALDOA)
LOC109097302	4.52666	2.17845	0.00969746	0.117437	NP_004322	BNIP3L	BCL2 interacting protein 3 like(BNIP3L)
LOC109097464	6.76474	2.75803	0.00114683	0.0591917	NP_001011513	PDLIM5	PDZ and LIM domain 5(PDLIM5)
LOC109097552	3.18418	1.67092	0.0094501	0.115695	XP_011510003	SSFA2	sperm specific antigen 2(SSFA2)
LOC109097720	4.94259	2.30527	0.00308759	0.0751709	NP_003349	UGCG	UDP-glucose ceramide glucosyltransferase(UGCG)
LOC109097723	8.88347	3.15112	0.00156902	0.0643527	NP_003349	UGCG	UDP-glucose ceramide glucosyltransferase(UGCG)
LOC109097783	13.152	3.71721	0.000758126	0.0551102	NP_001300893	DNAJB1	DnaJ heat shock protein family (Hsp40) member B1(DNAJB1)
LOC109097871	3.69791	1.88671	0.00706919	0.102255	NP_001159584	PNPLA6	patatin like phospholipase domain containing 6(PNPLA6)
LOC109097984	0.121364	-3.04259	0.00562084	0.0928823	NP_003264	TM7SF2	transmembrane 7 superfamily member 2(TM7SF2)
LOC109098086	13.773	3.78377	0.00210683	0.0675002	NP_115953	DGAT2	diacylglycerol O-acyltransferase 2(DGAT2)
LOC109098089	11.4166	3.51306	0.00090194	0.0568774	NP_001307660	ZBTB21	zinc finger and BTB domain containing 21(ZBTB21)
LOC109098146	5.70904	2.51325	0.00364589	0.0791594	NP_079427	RAB11FIP1	RAB11 family interacting protein 1(RAB11FIP1)
LOC109098537	10.9272	3.44985	0.00197605	0.0672455	NP_000322	SAA1	serum amyloid A1(SAA1)
LOC109098582	5.45855	2.44852	0.00319184	0.0751709	NP_005953	MXI1	MAX interactor 1, dimerization protein(MXI1)
LOC109098604	4.06394	2.02288	0.00445485	0.082791	NP_002061	GNAI2	G protein subunit alpha i2(GNAI2)
LOC109098745	4.103	2.03668	0.00593516	0.0942686	NP_001351227	-	-
LOC109098750	4.38899	2.13389	0.00300761	0.0745936	NP_001364270	-	-
LOC109098862	3.45563	1.78895	0.00754827	0.105723	NP_002198	ITGA9	integrin subunit alpha 9(ITGA9)
LOC109098887	13.9316	3.80029	0.000765919	0.0551102	NP_005156	ALDOC	aldolase, fructose-bisphosphate C(ALDOC)
LOC109098923	5.36247	2.4229	0.002407	0.069606	NP_443112	PIK3IP1	phosphoinositide-3-kinase interacting protein 1(PIK3IP1)
LOC109099060	0.315536	-1.66412	0.00933253	0.115693	NP_079105	PLBD1	phospholipase B domain containing 1(PLBD1)
LOC109099225	9.86841	3.30282	0.00323577	0.0756403	NP_001419	ENO1	enolase 1(ENO1)
LOC109099396	4.48496	2.1651	0.00314052	0.0751709	NP_001231191	HBP1	HMG-box transcription factor 1(HBP1)
LOC109099398	3.23984	1.69592	0.00957075	0.116607	NP_001231191	HBP1	HMG-box transcription factor 1(HBP1)
LOC109099476	14.4031	3.84831	0.000747405	0.0551102	NP_006500	RELB	RELB proto-oncogene, NF-kB subunit(RELB)
LOC109099682	26.988	4.75424	0.000343965	0.0551102	XP_011527279	SDC4	syndecan 4(SDC4)
LOC109100062	4.53215	2.1802	0.00795517	0.107821	NP_001335645	-	-
LOC109100072	7.27783	2.86351	0.00141624	0.0621015	-	-	-
LOC109100107	4.09643	2.03437	0.00680082	0.100746	NP_005389	PPP1R3C	protein phosphatase 1 regulatory subunit 3C(PPP1R3C)
LOC109100137	3.6964	1.88612	0.00600217	0.0945272	NP_001339726	-	-
LOC109100396	3.12107	1.64204	0.00955192	0.116607	NP_000867	IGF2R	insulin like growth factor 2 receptor(IGF2R)
LOC109100594	5.50826	2.4616	0.00424949	0.0803094	NP_005428	NCOA4	nuclear receptor coactivator 4(NCOA4)
LOC109100680	11.2761	3.49519	0.00106992	0.0591917	NP_002080	CXCL2	C-X-C motif chemokine ligand 2(CXCL2)
LOC109100813	4.92707	2.30073	0.0036669	0.0792583	NP_066952	PPA1	pyrophosphatase (inorganic) 1(PPA1)
LOC109101213	12.9004	3.68934	0.000510455	0.0551102	NP_942147	PHLDB3	pleckstrin homology like domain family B member 3(PHLDB3)
LOC109101387	4.33845	2.11718	0.00587985	0.0942686	XP_011535859	PPARGC1B	PPARG coactivator 1 beta(PPARGC1B)
LOC109101393	3.09591	1.63036	0.00937729	0.115693	XP_011543526	STX5	syntaxin 5(STX5)
LOC109101578	16.7083	4.06249	0.000540874	0.0551102	NP_004411	DUSP8	dual specificity phosphatase 8(DUSP8)
LOC109101931	4.1418	2.05026	0.00788835	0.107349	NP_001276719	GPI	glucose-6-phosphate isomerase(GPI)
LOC109102208	3.95936	1.98527	0.00534332	0.0899383	NP_003723	EIF4EBP3	eukaryotic translation initiation factor 4E binding protein 3(EIF4EBP3)
LOC109102225	3.98446	1.99439	0.00937795	0.115693	-	-	-
LOC109102290	0.234016	-2.09532	0.00782087	0.107056	XP_016855574	TXNIP	thioredoxin interacting protein(TXNIP)
LOC109102300	6.91564	2.78986	0.00163758	0.0647425	NP_055986	XPO6	exportin 6(XPO6)
LOC109102357	15.8683	3.98808	0.00141011	0.0621015	NP_001184249	MCL1	BCL2 family apoptosis regulator(MCL1)
LOC109102362	5.53467	2.4685	0.00526412	0.0899383	XP_005254595	MAPK6	mitogen-activated protein kinase 6(MAPK6)
LOC109102363	4.86013	2.281	0.00380076	0.0798798	NP_002578	PCDH1	protocadherin 1(PCDH1)
LOC109102398	5.59915	2.48521	0.00412158	0.0800268	NP_001371692	-	-
LOC109103098	4.0362	2.013	0.00529252	0.0899383	XP_006722217	KSR1	kinase suppressor of ras 1(KSR1)
LOC109103188	3.41118	1.77027	0.00863417	0.112479	NP_056006	SIK2	salt inducible kinase 2(SIK2)
LOC109103231	0.0678432	-3.88165	0.00123736	0.0609716	NP_000473	APOA4	apolipoprotein A4(APOA4)
LOC109103423	14.5171	3.85968	0.000732641	0.0551102	NP_001098117	SLC25A36	solute carrier family 25 member 36(SLC25A36)
LOC109103539	3.98786	1.99562	0.00818293	0.10915	NP_056953	PPARG	peroxisome proliferator activated receptor gamma(PPARG)
LOC109103773	14.6676	3.87456	0.000803431	0.0551102	NP_851397	HIF1A	hypoxia inducible factor 1 alpha subunit(HIF1A)
LOC109103780	18.8009	4.23273	0.000407551	0.0551102	NP_851397	HIF1A	hypoxia inducible factor 1 alpha subunit(HIF1A)
LOC109103872	4.31066	2.10791	0.00519726	0.0899383	XP_011533312	FOXO1	forkhead box O1(FOXO1)
LOC109103981	5.26729	2.39706	0.00545833	0.0908684	NP_001307852	JAK1	Janus kinase 1(JAK1)
LOC109104119	3.32793	1.73463	0.00855946	0.11194	XP_005246744	MFF	mitochondrial fission factor(MFF)
LOC109104270	4.41447	2.14224	0.00786471	0.107245	NP_001748	CBR1	carbonyl reductase 1(CBR1)
LOC109104343	3.88335	1.9573	0.00504	0.0889826	NP_002301	LIFR	leukemia inhibitory factor receptor alpha(LIFR)
LOC109104474	6.33349	2.663	0.0029657	0.0745936	NP_006636	STARD10	StAR related lipid transfer domain containing 10(STARD10)
LOC109104646	7.84978	2.97265	0.00278462	0.0741349	NP_001276929	NFIL3	nuclear factor, interleukin 3 regulated(NFIL3)
LOC109104731	4.60144	2.20209	0.00804253	0.108348	NP_003391	XPO1	exportin 1(XPO1)
LOC109104786	54.8932	5.77856	0.000381163	0.0551102	NP_061130	ZNF395	zinc finger protein 395(ZNF395)
LOC109104846	7.9394	2.98903	0.00135106	0.0612814	NP_116000	PTP4A3	protein tyrosine phosphatase type IVA, member 3(PTP4A3)
LOC109104873	0.279438	-1.8394	0.00533727	0.0899383	NP_060518	MAGOHB	mago homolog B, exon junction complex core component(MAGOHB)
LOC109104899	4.85877	2.28059	0.00298357	0.0745936	NP_036466	MYO10	myosin X(MYO10)
LOC109104999	3.89208	1.96054	0.00578954	0.0938213	NP_001161860	CITED2	Cbp/p300 interacting transactivator with Glu/Asp rich carboxy-terminal domain 2(CITED2)
LOC109105172	10.1645	3.34547	0.000992861	0.0573012	NP_073592	IPPK	inositol-pentakisphosphate 2-kinase(IPPK)
LOC109105243	8.01283	3.00231	0.00186805	0.0672455	NP_001722	BTG1	BTG anti-proliferation factor 1(BTG1)
LOC109105433	4.67718	2.22564	0.00674465	0.100746	NP_004359	CNN2	calponin 2(CNN2)
LOC109105682	7.86106	2.97472	0.00124506	0.0609716	NP_110389	BHLHE41	basic helix-loop-helix family member e41(BHLHE41)
LOC109105796	5.34063	2.41701	0.00221623	0.0675002	NP_877439	MACC1	MACC1, MET transcriptional regulator(MACC1)
LOC109105814	4.78072	2.25723	0.00712737	0.102613	NP_001368872	-	-
LOC109105901	3.27125	1.70984	0.00997882	0.119041	NP_064512	TUFT1	tuftelin 1(TUFT1)
LOC109105910	6.92987	2.79283	0.00188291	0.0672455	NP_150601	TP53INP1	tumor protein p53 inducible nuclear protein 1(TP53INP1)
LOC109105940	9.78446	3.29049	0.00283932	0.0745936	NP_001171470	SLC34A2	solute carrier family 34 member 2(SLC34A2)
LOC109105991	11.7308	3.55223	0.00113361	0.0591917	NP_068779	MCL1	BCL2 family apoptosis regulator(MCL1)
LOC109106168	7.29972	2.86784	0.00339344	0.0773604	XP_016857180	PNRC2	proline rich nuclear receptor coactivator 2(PNRC2)
LOC109106501	7.74805	2.95383	0.00175374	0.0661002	NP_065821	CGN	cingulin(CGN)
LOC109106529	3.8352	1.9393	0.00513118	0.0899383	NP_001076581	GPD2	glycerol-3-phosphate dehydrogenase 2(GPD2)
LOC109106603	0.312014	-1.68032	0.00932264	0.115693	NP_001373857	-	-
LOC109106607	122.988	6.94238	0.000139607	0.0551102	NP_001186550	NCOA7	nuclear receptor coactivator 7(NCOA7)
LOC109106889	28.7503	4.8455	0.000620914	0.0551102	NP_055399	ERO1A	endoplasmic reticulum oxidoreductase 1 alpha(ERO1A)
LOC109107006	5.10587	2.35216	0.00224326	0.0675002	NP_001307852	JAK1	Janus kinase 1(JAK1)
LOC109107034	0.0668257	-3.90345	0.00169804	0.0647963	NP_001171187	KLF11	Kruppel like factor 11(KLF11)
LOC109107148	3.84918	1.94455	0.00611052	0.0957287	NP_001003698	RREB1	ras responsive element binding protein 1(RREB1)
LOC109107242	5.16683	2.36928	0.00519235	0.0899383	NP_116193	ADO	2-aminoethanethiol dioxygenase(ADO)
LOC109107424	0.312505	-1.67805	0.00921558	0.115404	NP_001970	EPHX2	epoxide hydrolase 2(EPHX2)
LOC109107585	3.55504	1.82987	0.00578453	0.0938213	XP_024308705	-	-
LOC109107655	4.35239	2.12181	0.00821591	0.10915	XP_024301883	-	-
LOC109107695	19.5768	4.29107	0.000593537	0.0551102	NP_001274117	ODC1	ornithine decarboxylase 1(ODC1)
LOC109107943	3.88601	1.95829	0.00977341	0.11767	NP_055275	CSDC2	cold shock domain containing C2(CSDC2)
LOC109108009	0.228906	-2.12717	0.00290787	0.0745936	NP_005225	NR2F6	nuclear receptor subfamily 2 group F member 6(NR2F6)
LOC109108049	5.44713	2.4455	0.00571007	0.0936648	NP_001304995	SEC24D	SEC24 homolog D, COPII coat complex component(SEC24D)
LOC109108057	3.76733	1.91354	0.0070751	0.102255	XP_016877054	ARID4A	AT-rich interaction domain 4A(ARID4A)
LOC109108134	6.51784	2.70439	0.00171551	0.0650245	NP_219494	CIPC	CLOCK interacting pacemaker(CIPC)
LOC109108189	6.94565	2.79611	0.00371551	0.0792583	NP_002145	HSPA4	heat shock protein family A (Hsp70) member 4(HSPA4)
LOC109108287	4.551	2.18618	0.00300077	0.0745936	NP_001106197	CEP170B	centrosomal protein 170B(CEP170B)
LOC109108375	13.1579	3.71785	0.00198296	0.0672455	NP_002667	PMM1	phosphomannomutase 1(PMM1)
LOC109108708	4.8633	2.28193	0.00313078	0.0751709	NP_001307667	FAM107B	family with sequence similarity 107 member B(FAM107B)
LOC109108723	0.222799	-2.16618	0.00584321	0.0942359	NP_005114	NR1H4	nuclear receptor subfamily 1 group H member 4(NR1H4)
LOC109108741	7.91467	2.98453	0.00197877	0.0672455	NP_001317145	CNP	2',3'-cyclic nucleotide 3' phosphodiesterase(CNP)
LOC109108871	12.2319	3.61258	0.000507024	0.0551102	-	-	-
LOC109108959	0.297466	-1.7492	0.00957676	0.116607	NP_001197	KLF9	Kruppel like factor 9(KLF9)
LOC109109056	3.83365	1.93872	0.00612127	0.0957287	XP_005256293	MTSS1L	MTSS1L, I-BAR domain containing(MTSS1L)
LOC109109104	5.39025	2.43035	0.00265698	0.0724621	NP_003496	FZD1	frizzled class receptor 1(FZD1)
LOC109109143	8.26338	3.04673	0.00142895	0.0622521	NP_001171647	TIPARP	TCDD inducible poly(ADP-ribose) polymerase(TIPARP)
LOC109109214	0.250211	-1.99879	0.00887951	0.114041	NP_002852	PCYT2	phosphate cytidylyltransferase 2, ethanolamine(PCYT2)
LOC109109260	24.3736	4.60725	0.000418815	0.0551102	NP_001252509	FAM13A	family with sequence similarity 13 member A(FAM13A)
LOC109109302	0.274787	-1.86361	0.00608528	0.0956115	NP_000704	BLVRB	biliverdin reductase B(BLVRB)
LOC109110063	11.8099	3.56192	0.00206116	0.0675002	NP_004408	DUSP1	dual specificity phosphatase 1(DUSP1)
LOC109110100	6.56048	2.7138	0.00140869	0.0621015	NP_001171647	TIPARP	TCDD inducible poly(ADP-ribose) polymerase(TIPARP)
LOC109110124	5.05145	2.3367	0.00433429	0.0814531	NP_005985	TBX2	T-box 2(TBX2)
LOC109110189	0.153431	-2.70434	0.00199036	0.0672455	NP_569732	TSPAN17	tetraspanin 17(TSPAN17)
LOC109110257	2.91911	1.54553	0.00932025	0.115693	NP_079517	UBXN6	UBX domain protein 6(UBXN6)
LOC109110269	4.48481	2.16505	0.00294568	0.0745936	NP_002383	MDM2	MDM2 proto-oncogene(MDM2)
LOC109110277	5.86463	2.55204	0.00653675	0.100126	NP_001161860	CITED2	Cbp/p300 interacting transactivator with Glu/Asp rich carboxy-terminal domain 2(CITED2)
LOC109110334	97.6982	6.61026	0.000187847	0.0551102	NP_000616	NOS2	nitric oxide synthase 2(NOS2)
LOC109110565	14.9926	3.90618	0.000557382	0.0551102	NP_003364	VCL	vinculin(VCL)
LOC109110840	3.9337	1.97589	0.00683012	0.100746	XP_024304715	-	-
LOC109110864	8.36801	3.06488	0.00403898	0.0800268	NP_116182	MFSD2A	major facilitator superfamily domain containing 2A(MFSD2A)
LOC109110873	4.16409	2.058	0.00733173	0.103993	-	-	-
LOC109110918	7.38348	2.8843	0.00108791	0.0591917	XP_011512953	GMNN	geminin, DNA replication inhibitor(GMNN)
LOC109110935	0.140019	-2.8363	0.00354171	0.0782264	NP_006570	EBP	emopamil binding protein (sterol isomerase)(EBP)
LOC109111349	3.18123	1.66958	0.00756858	0.105759	NP_006485	ERF	ETS2 repressor factor(ERF)
LOC109111491	0.134897	-2.89007	0.00348274	0.0782264	NP_006264	CCL7	C-C motif chemokine ligand 7(CCL7)
LOC109111542	6.65674	2.73482	0.00134862	0.0612814	-	-	-
LOC109111619	4.37314	2.12867	0.00923714	0.115404	NP_001361775	-	-
LOC109111636	6.48366	2.69681	0.00169983	0.0647963	NP_699172	RNF19B	ring finger protein 19B(RNF19B)
LOC109111637	9.20326	3.20214	0.00120886	0.0605244	NP_699172	RNF19B	ring finger protein 19B(RNF19B)
LOC109111642	4.43018	2.14736	0.00799398	0.108128	NP_001356789	-	-
LOC109111658	3.08367	1.62465	0.00887883	0.114041	XP_005245003	CRTC2	CREB regulated transcription coactivator 2(CRTC2)
LOC109111698	6.00644	2.58651	0.00127027	0.0612814	NP_116000	PTP4A3	protein tyrosine phosphatase type IVA, member 3(PTP4A3)
LOC109111700	5.27081	2.39802	0.00271649	0.0731925	-	-	-
LOC109111706	10.0929	3.33527	0.00136086	0.0612814	NP_001017926	ZHX1	zinc fingers and homeoboxes 1(ZHX1)
LOC109111796	195.926	7.61417	6.83e-05	0.0551102	NP_001011666	CREB5	cAMP responsive element binding protein 5(CREB5)
LOC109111807	3.4653	1.79298	0.00938676	0.115693	NP_056281	PTPN23	protein tyrosine phosphatase, non-receptor type 23(PTPN23)
LOC109111989	6.3705	2.67141	0.00235198	0.0689924	XP_011512857	hivep1	human immunodeficiency virus type I enhancer binding protein 1(HIVEP1)
LOC109112073	5.81385	2.53949	0.0029651	0.0745936	NP_001372905	-	-
LOC109112409	15.7229	3.9748	0.000732885	0.0551102	XP_011512855	hivep1	human immunodeficiency virus type I enhancer binding protein 1(HIVEP1)
LOC109112571	6.45697	2.69086	0.00146876	0.0627636	XP_005248178	SLAIN2	SLAIN motif family member 2(SLAIN2)
LOC109112803	41.3097	5.36841	0.000173474	0.0551102	NP_001665	ATF3	activating transcription factor 3(ATF3)
LOC109112877	16.4105	4.03655	0.00041104	0.0551102	NP_001248356	LPIN1	lipin 1(LPIN1)
LOC109113071	23.5784	4.55939	0.00034179	0.0551102	NP_006725	HIVEP2	human immunodeficiency virus type I enhancer binding protein 2(HIVEP2)
LOC109113360	4.9833	2.3171	0.00783491	0.107056	NP_002219	JUN	Jun proto-oncogene, AP-1 transcription factor subunit(JUN)
LOC109113363	7.81633	2.96649	0.00355691	0.0782404	NP_002219	JUN	Jun proto-oncogene, AP-1 transcription factor subunit(JUN)
LOC109113581	10.182	3.34795	0.00094331	0.0571771	NP_003740	IRS2	insulin receptor substrate 2(IRS2)
LOC109113598	7.87775	2.97778	0.0021172	0.0675002	NP_002094	GYS1	glycogen synthase 1(GYS1)
LOC109113683	4.95936	2.31015	0.00210761	0.0675002	NP_001101	ADAM10	ADAM metallopeptidase domain 10(ADAM10)
mkl2	4.44851	2.15332	0.00416105	0.080152	NP_001295071	MKL2	MKL1/myocardin like 2(MKL2)
mtf2	0.190007	-2.39588	0.00189609	0.0672455	NP_031384	MTF2	metal response element binding transcription factor 2(MTF2)
nadk	6.04729	2.59629	0.00363436	0.0791594	NP_001340570	-	-
ppp2cb	5.80618	2.53759	0.00403918	0.0800268	NP_001009552	PPP2CB	protein phosphatase 2 catalytic subunit beta(PPP2CB)
prune1	4.47579	2.16214	0.00589435	0.0942686	NP_067045	PRUNE1	prune exopolyphosphatase(PRUNE1)
rhobtb3	24.2248	4.59841	0.000745518	0.0551102	NP_055714	RHOBTB3	Rho related BTB domain containing 3(RHOBTB3)
samd4a	7.66426	2.93815	0.000939508	0.0571771	NP_056404	SAMD4A	sterile alpha motif domain containing 4A(SAMD4A)
slc26a5	7.22273	2.85254	0.00254842	0.071239	NP_945350	SLC26A5	solute carrier family 26 member 5(SLC26A5)
slc2a1	12.532	3.64755	0.00074107	0.0551102	NP_006507	SLC2A1	solute carrier family 2 member 1(SLC2A1)
srebf1	4.66328	2.22134	0.00704436	0.102255	NP_004167	SREBF1	sterol regulatory element binding transcription factor 1(SREBF1)
tbk1	3.488	1.8024	0.00913132	0.115371	NP_037386	TBK1	TANK binding kinase 1(TBK1)
tmem220	0.215006	-2.21755	0.00465297	0.0852917	NP_001004313	TMEM220	transmembrane protein 220(TMEM220)
triqk	0.196617	-2.34654	0.00200464	0.0672455	NP_001165270	triqk	triple QxxK/R motif containing(TRIQK)
ube2h	9.47076	3.24348	0.000600743	0.0551102	NP_003335	UBE2H	ubiquitin conjugating enzyme E2 H(UBE2H)
uprt	5.61328	2.48884	0.0023842	0.069245	NP_659489	UPRT	uracil phosphoribosyltransferase homolog(UPRT)
usp36	3.50672	1.81012	0.00628698	0.0976374	NP_001372104	-	-
zmynd12	18.4457	4.20521	0.000294163	0.0551102	NP_115633	ZMYND12	zinc finger MYND-type containing 12(ZMYND12)

## Sheet: Intestine
Sequence_id	Fold Change	logFC	p-value	FDR	Refseq	Gene_symbol	Gene_Name
abcf3	0.26377	-1.92265	0.0056408	0.260927	NP_060828	ABCF3	ATP binding cassette subfamily F member 3(ABCF3)
adi1	0.248807	-2.0069	0.00299642	0.228468	NP_060739	ADI1	acireductone dioxygenase 1(ADI1)
ccng2	4.82898	2.27172	0.00256128	0.228082	NP_004345	CCNG2	cyclin G2(CCNG2)
clptm1l	0.302537	-1.72482	0.00601162	0.264262	NP_110409	CLPTM1L	CLPTM1 like(CLPTM1L)
crot	0.294927	-1.76157	0.00696449	0.276517	NP_066974	CROT	carnitine O-octanoyltransferase(CROT)
cunh14orf28	2.98744	1.57891	0.00904754	0.285221	NP_001017923	c14orf28	chromosome 14 open reading frame 28(C14orf28)
ddx11	3.13865	1.65014	0.00789439	0.281365	XP_005253390	DDX11	DEAD/H-box helicase 11(DDX11)
denr	0.344492	-1.53746	0.00962084	0.285221	NP_003668	DENR	density regulated re-initiation and release factor(DENR)
dhx29	0.294748	-1.76245	0.00975378	0.286793	NP_001332894	DHX29	DExH-box helicase 29(DHX29)
gpaa1	0.208406	-2.26253	0.0038292	0.23597	NP_003792	GPAA1	glycosylphosphatidylinositol anchor attachment 1(GPAA1)
hif1an	5.21234	2.38193	0.00189458	0.227068	NP_060372	HIF1AN	hypoxia inducible factor 1 alpha subunit inhibitor(HIF1AN)
hspa14	0.265492	-1.91326	0.00416192	0.238336	NP_057383	HSPA14	heat shock protein family A (Hsp70) member 14(HSPA14)
lars	0.317678	-1.65436	0.00809928	0.283461	NP_064502	LARS	leucyl-tRNA synthetase(LARS)
LOC109044821	0.292154	-1.7752	0.00622515	0.264262	NP_001295117	PSMA8	proteasome subunit alpha 8(PSMA8)
LOC109045076	0.3051	-1.71264	0.00585827	0.263665	NP_004252	SELENOF	selenoprotein F(SELENOF)
LOC109045295	0.322159	-1.63415	0.00804643	0.282577	NP_653164	RPIA	ribose 5-phosphate isomerase A(RPIA)
LOC109045899	2.9384	1.55503	0.00937312	0.285221	-	-	-
LOC109045911	4.09765	2.0348	0.00329423	0.228468	NP_001269970	USP25	ubiquitin specific peptidase 25(USP25)
LOC109045912	3.79014	1.92225	0.00551787	0.260927	NP_003480	NRIP1	nuclear receptor interacting protein 1(NRIP1)
LOC109045959	6.16722	2.62462	0.00243893	0.227068	NP_005428	NCOA4	nuclear receptor coactivator 4(NCOA4)
LOC109046453	0.243408	-2.03855	0.00379781	0.23597	NP_510883	TM2D3	TM2 domain containing 3(TM2D3)
LOC109046541	3.67836	1.87906	0.00862924	0.285221	XP_011526291	INSR	insulin receptor(INSR)
LOC109046642	0.247166	-2.01645	0.00687533	0.274504	NP_001295138	PRSS57	protease, serine 57(PRSS57)
LOC109046717	0.294955	-1.76143	0.00793316	0.281659	XP_011520344	PEAK1	pseudopodium enriched atypical kinase 1(PEAK1)
LOC109046777	0.294867	-1.76186	0.00598028	0.264262	NP_004060	AP2S1	adaptor related protein complex 2 sigma 1 subunit(AP2S1)
LOC109046925	3.80296	1.92712	0.00893413	0.285221	NP_057323	MYO15A	myosin XVA(MYO15A)
LOC109047174	3.31567	1.7293	0.00583107	0.263391	NP_851393	AXIN1	axin 1(AXIN1)
[truncated: 400 more rows]
