# Supplementary material for: Comparative Transcriptome Analysis of Organ-Specific Adaptive Responses to Hypoxia Provides Insights to Human Diseases
Source: Genes (Basel). 2022 Jun 19;13(6):1096. doi: 10.3390/genes13061096 (PMC9222487; doi:10.3390/genes13061096)
Supplement: Supplementary file 1 [file genes-13-01096-s001.zip › Table S2.xlsx]

## Sheet: Brain up GO BP
Category	GO ID and Term Description	Count	%	p-value	Genes	List Total	Pop Hits	Pop Total	Fold Enrichment	Bonferroni	Benjamini	FDR
GOTERM_BP_DIRECT	GO:0001525~angiogenesis	27	3.27273	7.97438e-06	GPI, NRP1, NRP2, CALCRL, SHC1, SERPINE1, TNFAIP2, NRXN3, HIF1A, SAT1, RASIP1, CTGF, RNF213, KDR, LEPR, JUN, JAG1, CAV1, HSPG2, VEGFA, MMP14, TAL1, ACKR3, PRKD1, ANGPTL4, RAMP1, SCG2	753	223	16792	2.70002	0.0255139	0.00234954	0.00228937
GOTERM_BP_DIRECT	GO:0001666~response to hypoxia	30	3.63636	6.41212e-10	CITED2, EPO, CXCR4, TRH, PLOD1, HIF1A, NPPC, HSD11B2, LDHA, EDNRA, UCP3, PENK, NOS1, EGLN1, EGR1, EGLN3, EGLN2, VCAM1, PRKCB, CAV1, ATP1B1, VEGFA, TGFBR3, MMP14, CXCL12, KCNMA1, DDIT4, LTA, ANGPTL4, PAM	753	172	16792	3.88956	2.07817e-06	6.92723e-07	6.74982e-07
GOTERM_BP_DIRECT	GO:0001764~neuron migration	17	2.06061	1.68045e-05	KIRREL3, NRP1, MEF2C, SEMA3A, NAV1, CCK, GATA3, NR2F2, NTN1, CXCL12, CCKAR, DDIT4, SPOCK1, MAPT, PITX2, GAS6, PRKG1	753	105	16792	3.6105	0.0530072	0.00373841	0.00364268
GOTERM_BP_DIRECT	GO:0001822~kidney development	14	1.69697	0.000111299	KCNJ8, SERPINF1, LRP4, GATA3, SULF1, PCSK5, PKD1, DCN, JMJD6, SULF2, VEGFA, CENPF, SALL1, ADAMTS1	753	86	16792	3.63025	0.30284	0.0112725	0.0109838
GOTERM_BP_DIRECT	GO:0001938~positive regulation of endothelial cell proliferation	11	1.33333	0.000948632	SEMA5A, NRP1, NRP2, JUN, CXCL12, KDR, CDH13, PRKD1, SCG2, HIF1A, VEGFA	753	69	16792	3.55509	0.953855	0.049589	0.048319
GOTERM_BP_DIRECT	GO:0002042~cell migration involved in sprouting angiogenesis	6	0.727273	0.000366694	ITGB1, EFNB2, NRP1, KDR, ROBO1, VEGFA	753	15	16792	8.92005	0.695375	0.025836	0.0251743
GOTERM_BP_DIRECT	GO:0002063~chondrocyte development	6	0.727273	0.000366694	ACAN, CHST11, COL11A1, SHOX2, SULF1, SULF2	753	15	16792	8.92005	0.695375	0.025836	0.0251743
GOTERM_BP_DIRECT	GO:0006468~protein phosphorylation	40	4.84848	8.62309e-05	ROCK2, NPR2, AATK, PIK3R1, KALRN, MYLK, RASSF2, CAMKV, RPS6KC1, MKNK2, SPEG, PIM3, MAP3K8, MAP4K5, PRKG1, SRPK3, PLK3, CAMK1D, PRKCB, PRKCE, PLK2, IGFBP3, MINK1, ADAM10, MMD2, TNNI3K, OXSR1, SRPK1, CIT, LOC102724428, SBK1, LATS2, CAMK4, ITPKA, FAM20C, PRKD1, SGK1, GAS6, TRIB2, CDK14	753	456	16792	1.95615	0.243828	0.00945725	0.00921506
GOTERM_BP_DIRECT	GO:0006810~transport	35	4.24242	1.73021e-05	GABRB1, CPNE7, CRABP1, CACNA1B, GRIK4, GRIK1, GRIK2, SLC6A1, CACNA1E, CLCN2, SLC5A5, GJC1, SYNPR, GRIN2A, MAP6, CACNG2, CLIC2, GRIA3, RAB11FIP4, GRIA4, ASIC1, SLC12A2, GABRA1, CHRNB3, SLC12A5, GABRA5, ATP1B4, ATP1B3, GRIN2B, SLC25A38, SLC5A6, SLC6A9, SYPL1, AKAP9, CNIH2	753	348	16792	2.24283	0.0545334	0.00373841	0.00364268
GOTERM_BP_DIRECT	GO:0006811~ion transport	17	2.06061	0.000175569	SLC12A2, GABRP, GABRA1, SLC24A4, GABRB1, SLC24A3, SLC12A5, SLC32A1, TRPA1, SLC1A1, SLC8A1, SLC5A5, SLC8A3, GLRA1, SLCO2A1, SLC17A6, SLC26A4	753	127	16792	2.98506	0.433948	0.0151422	0.0147544
GOTERM_BP_DIRECT	GO:0006814~sodium ion transport	12	1.45455	0.000937214	SLC5A6, SLC12A2, SLC13A4, SLC17A6, ATP1B4, ATP1B3, ATP1B1, SLC13A5, SGK1, SLC38A3, SCN4B, ASIC1	753	81	16792	3.30372	0.952114	0.049589	0.048319
GOTERM_BP_DIRECT	GO:0007155~cell adhesion	57	6.90909	8.24829e-12	DDR1, SEMA5A, CNTNAP2, PTPRU, SPON1, NRP2, NCAN, COL12A1, ATP2A2, ITGAE, RND3, ROBO1, CTGF, CDH5, CDH4, ALCAM, ADGRE5, EDIL3, MYBPC1, DSCAM, ITGA4, PRKCE, RGMB, ATP1B1, AJAP1, BCAN, ADGRB1, ADAM12, CDH11, COL4A6, ANOS1, CDH13, SPACA4, GAS6, NLGN1, HEPACAM, PCDH18, EFNB2, ACAN, PODXL, SPOCK1, NCAM1, HES1, SUSD5, OPCML, NLGN4X, VCAM1, LAMB2, LRRN2, LSAMP, KITLG, CXCL12, FAT1, CD9, ACKR3, CD22, NECT…	753	459	16792	2.7693	2.67327e-08	1.33663e-08	1.3024e-08
GOTERM_BP_DIRECT	GO:0007156~homophilic cell adhesion via plasma membrane adhesion molecules	21	2.54545	2.6613e-05	ITGB1, KIRREL3, TENM3, DSCAM, CLSTN2, CADM1, PCDH19, PCDH18, PVR, PKD1, ROBO1, CDH5, CDH4, CDH11, CDH23, FAT1, CDH24, CDH13, FAT4, IGSF9B, NECTIN1	753	158	16792	2.96394	0.0826387	0.00496142	0.00483436
GOTERM_BP_DIRECT	GO:0007157~heterophilic cell-cell adhesion via plasma membrane cell adhesion molecules	12	1.45455	1.0182e-05	TENM1, NLGN1, CDH4, TENM3, VCAM1, CXADR, ALCAM, CADM1, TENM4, FAT4, PVR, NECTIN1	753	50	16792	5.35203	0.0324613	0.00274998	0.00267955
GOTERM_BP_DIRECT	GO:0007165~signal transduction	92	11.1515	9.71647e-08	TENM1, NRP1, GABRB1, SPARC, TENM3, RTKN, TENM4, EPO, LY75, ARRB1, TRH, EPS8, SYDE2, THBD, CRHBP, EDNRA, ALCAM, TAGAP, PDE4B, CLIC2, PRKG1, ANXA1, CHRNB3, UNC5A, IGFBP5, PRKCB, PRKCE, ARRDC2, IGFBP2, ARRDC3, CARTPT, UNC5D, RGMB, MR1, ARHGAP45, RASA4, AKAP9, ADGRB1, ITPKA, LTA, CRH, PRKD1, GAS6, MET, RIN2, HBEGF, GRIA1, KHDRBS1, PDE1C, SHC1, CRABP1, NRXN3, CREM, PIK3R2, PIK3R1, GATA3, NDRG2, ADCY8,…	753	1161	16792	1.76711	0.000314861	7.87277e-05	7.67115e-05
GOTERM_BP_DIRECT	GO:0007215~glutamate receptor signaling pathway	7	0.848485	2.79567e-05	GRIN2A, GRIK4, GRIK1, GRIK2, GRIN2B, GRIA3, GRIA4	753	15	16792	10.4067	0.0866252	0.00496142	0.00483436
GOTERM_BP_DIRECT	GO:0007268~chemical synaptic transmission	45	5.45455	1.01008e-15	GRIA1, DOC2A, SLC1A1, CACNA1B, GRIK4, GRIK1, GRIK2, SLC6A1, CACNA1E, GJC1, GRIN2A, GRM5, GRM4, NPY, KIF5A, PENK, SNCG, DLGAP1, TAC1, NPTX2, GRIA3, GRIA4, SLC12A5, SYT1, HOMER1, GABRA5, GAD1, MINK1, SLC6A13, GAD2, SLC6A11, CARTPT, PDYN, GRIN2B, GRIN1, GRIN2D, CACNB2, LRFN5, SYPL1, DLG4, SST, AKAP9, PMP22, CRH, KCNQ5	753	240	16792	4.18127	3.23841e-12	3.27367e-12	3.18983e-12
GOTERM_BP_DIRECT	GO:0007269~neurotransmitter secretion	12	1.45455	1.24622e-05	GRM4, PTPRN2, SYT2, SLC32A1, SYT1, GAD1, STXBP1, CACNA1B, NRXN3, GAD2, PPFIA2, BAIAP3	753	51	16792	5.24709	0.0395853	0.00310691	0.00302735
GOTERM_BP_DIRECT	GO:0007399~nervous system development	34	4.12121	6.84175e-07	SEMA5A, TENM1, NLGN1, DOC2A, MYT1L, ZC4H2, SHOX2, STMN3, GRIK1, PTN, EFNA5, BZW2, KALRN, PCDH18, RAPGEFL1, ROBO1, GLIS2, NEUROD6, SPOCK1, HES1, MEF2C, TRPC5, JAG1, DSCAM, LSAMP, GFRA2, VEGFA, GAL, DLG4, MAP1B, NEURL1, CSPG5, MINOS1-NBL1, IGSF9B	753	287	16792	2.64183	0.00221496	0.000316773	0.000308661
GOTERM_BP_DIRECT	GO:0007411~axon guidance	25	3.0303	1.6896e-07	NRP1, NRP2, SEMA3A, NRXN3, GATA3, EFNA5, NTN1, ROBO1, EFNB2, CDH4, KIF5C, KIF5A, NCAM1, WNT3, EPHA5, UNC5A, LAMB2, UNC5D, POU4F2, EFNA3, CXCL12, ANOS1, PRKCQ, EZR, NECTIN1	753	159	16792	3.50631	0.000547451	0.00010952	0.000106715
GOTERM_BP_DIRECT	GO:0007420~brain development	20	2.42424	0.000905254	CNTNAP2, CA10, ZFHX3, SYT1, CADM1, GABRA5, FOXJ1, SLC6A11, SLC7A11, ECE2, PCDH19, PCDH18, EML1, PTPRG, DMRTA2, DDIT4, NEURL1, CD9, CKB, SLC38A3	753	190	16792	2.34738	0.946883	0.0488988	0.0476465
GOTERM_BP_DIRECT	GO:0007507~heart development	25	3.0303	2.29419e-06	NRP2, SPARC, CALCRL, SHC1, CITED2, DNAH5, SHOX2, ECE1, GATA3, PTN, ECE2, PCSK5, PKD1, ROBO1, ZFP36L1, ACAN, GYS1, EDNRA, SALL1, MEF2C, CXADR, KCNJ8, FOXJ1, JMJD6, PAM	753	183	16792	3.04647	0.00740791	0.000743547	0.000724505
GOTERM_BP_DIRECT	GO:0007611~learning or memory	9	1.09091	0.000154441	CRHBP, GPI, MEF2C, GRIN2A, PTPRZ1, CRH, ADCY8, GRIN2B, ZNF385A	753	36	16792	5.57503	0.393821	0.0143012	0.0139349
GOTERM_BP_DIRECT	GO:0007612~learning	12	1.45455	3.77922e-05	SLC8A3, CNTNAP2, GRM5, JUN, SLC12A5, NLGN4X, ATP8A1, DLG4, NRXN3, PTN, COMT, SLC6A1	753	57	16792	4.69476	0.115282	0.00556747	0.00542489
GOTERM_BP_DIRECT	GO:0007616~long-term memory	8	0.969697	0.000182211	GRIA1, CAMK4, ADCY1, CPEB3, ADCY8, SGK1, TAC1, GRIN1	753	28	16792	6.37147	0.446005	0.0151422	0.0147544
GOTERM_BP_DIRECT	GO:0008285~negative regulation of cell proliferation	35	4.24242	0.000224406	DDR1, TENM1, PTPRU, SERPINE2, CHD5, GATA3, NPPC, SLC9A3R1, CDH5, ADAMTS1, CLMN, FTH1, TIMP2, SPEG, TP53I11, SOX7, JUN, BCL11B, IGFBP3, EMP3, AXIN2, SFRP1, ZEB1, BCL6, SST, DLC1, ABI1, NEURL1, ADGRB1, PMP22, CD9, CDH13, ATF5, PLPP1, MXD4	753	396	16792	1.97097	0.516828	0.0173167	0.0168732
GOTERM_BP_DIRECT	GO:0008360~regulation of cell shape	18	2.18182	0.000175478	ANXA1, PTN, PALM2-AKAP2, FGD1, VEGFA, EPS8, SLC9A3R1, FGD6, DLC1, RHOJ, PDPN, PALM, CDC42EP2, S100A13, KDR, ALDOA, EZR, RHOQ	753	140	16792	2.86716	0.433782	0.0151422	0.0147544
GOTERM_BP_DIRECT	GO:0010977~negative regulation of neuron projection development	10	1.21212	0.000119377	RAP1GAP2, LRP1, SEMA3A, PMP22, NR2F1, INPP5J, SPOCK1, VIM, PTPRG, ITM2C	753	44	16792	5.06821	0.320857	0.0117243	0.011424
GOTERM_BP_DIRECT	GO:0015812~gamma-aminobutyric acid transport	4	0.484848	0.000835918	SLC32A1, SLC6A13, SLC6A11, SLC6A1	753	5	16792	17.8401	0.933486	0.0463126	0.0451266
GOTERM_BP_DIRECT	GO:0018401~peptidyl-proline hydroxylation to 4-hydroxy-L-proline	4	0.484848	0.000835918	EGLN1, EGLN3, EGLN2, P4HA1	753	5	16792	17.8401	0.933486	0.0463126	0.0451266
GOTERM_BP_DIRECT	GO:0019933~cAMP-mediated signaling	10	1.21212	3.49213e-05	EPHA5, ADCYAP1, SLC9A3R1, ADCYAP1R1, GAL, KSR1, NPR3, ADCY2, ADCY1, ADCY8	753	38	16792	5.86846	0.107012	0.00538952	0.0052515
GOTERM_BP_DIRECT	GO:0030198~extracellular matrix organization	21	2.54545	0.000518842	ITGB1, DDR1, ERO1A, OLFML2B, VCAM1, SPARC, ITGA4, LAMB2, COL11A1, NCAN, SERPINE1, BGN, FBLN1, ITGAE, HSPG2, DCN, ACAN, BCAN, PXDN, COL4A6, KDR	753	196	16792	2.3893	0.813999	0.0329719	0.0321275
GOTERM_BP_DIRECT	GO:0030334~regulation of cell migration	12	1.45455	0.000428926	JAG2, JAG1, SERPINE2, SST, MINK1, PLXNA1, CXCR4, LDB2, PITX2, SGK1, NTN1, PLXNA4	753	74	16792	3.61624	0.751036	0.0286901	0.0279554
GOTERM_BP_DIRECT	GO:0031623~receptor internalization	9	1.09091	0.00056113	ITGB1, GRIA1, CALCRL, TFRC, CAV1, CD9, ACKR3, EZR, RAMP1	753	43	16792	4.66747	0.837834	0.0349735	0.0340779
GOTERM_BP_DIRECT	GO:0032355~response to estradiol	14	1.69697	0.000199654	GPI, ADCYAP1R1, ANXA1, DUSP1, IGFBP2, PTN, NR2F2, SLC6A1, TFPI, CTGF, MMP15, PENK, TXNIP, PAM	753	91	16792	3.43079	0.476461	0.0157824	0.0153782
GOTERM_BP_DIRECT	GO:0034220~ion transmembrane transport	24	2.90909	7.03e-05	GRIA1, GABRA1, GABRB1, ATP8A1, GABRA5, ATP2A2, GRIK4, ATP1B3, GRIK1, GRIK2, ATP1B1, NALCN, GRIN2B, CLCN2, NCALD, GRIN2D, GJC1, GLRA1, ARHGEF9, DLG4, SGK1, GRIA3, ASIC1, GRIA4	753	210	16792	2.54859	0.203757	0.00876317	0.00853875
GOTERM_BP_DIRECT	GO:0035235~ionotropic glutamate receptor signaling pathway	10	1.21212	4.92476e-07	GRIA1, GRIN2A, GRIK4, GRIK1, GRIK2, GRIN2B, GRIA3, GRIN1, GRIN2D, GRIA4	753	24	16792	9.29172	0.00159484	0.000266019	0.000259206
GOTERM_BP_DIRECT	GO:0035556~intracellular signal transduction	41	4.9697	2.15778e-06	MAST4, SHC1, NPR2, TULP4, HSPB1, ADCY2, ADCY1, ADCY8, KALRN, CTGF, GNAI2, ZFP36, CHN1, MKNK2, MAP4K5, STK32C, TNS1, KSR1, IGFBP5, PRKCB, DUSP1, PRKCE, MINK1, PLCL2, OXSR1, SRPK1, ARHGAP45, CIT, TGFBR3, RP1L1, LOC102724428, LATS2, RASA4, CAMK4, ARHGEF3, PRKCQ, PRKD1, ARHGEF2, PLCH2, SGK1, SCG2	753	403	16792	2.26875	0.00696896	0.000743547	0.000724505
GOTERM_BP_DIRECT	GO:0038033~positive regulation of endothelial cell chemotaxis by VEGF-activated vascular endothelial growth factor receptor signaling pathway	4	0.484848	0.000835918	KDR, HSPB1, PRKD1, VEGFA	753	5	16792	17.8401	0.933486	0.0463126	0.0451266
GOTERM_BP_DIRECT	GO:0042493~response to drug	31	3.75758	4.42873e-05	ADCYAP1R1, MAOB, GATA3, PTN, ADCY1, COMT, SLC8A1, AQP1, NPPC, HSD11B2, GRIN2A, LDHA, TIMP2, TIMP4, JUN, ANXA1, SLC12A5, TRPA1, GAD1, IGFBP2, GAD2, SLC6A11, DUSP6, SFRP1, CENPF, GAL, SST, LTA, CRH, TXNIP, PAM	753	304	16792	2.27403	0.133713	0.00598064	0.00582748
GOTERM_BP_DIRECT	GO:0043065~positive regulation of apoptotic process	28	3.39394	0.000468525	ITGB1, CSRNP3, RASGRF2, PTN, KALRN, CLU, FGD1, GRIN2A, LDHA, RASSF2, CAMK1D, DUSP1, IGFBP3, DUSP6, GRIN1, SFRP1, ARHGEF9, GAL, LATS2, BCL6, KCNMA1, NEURL1, EEF1A2, LTA, ARHGEF3, TXNIP, ARHGEF2, NGEF	753	300	16792	2.08135	0.781036	0.0303698	0.0295921
GOTERM_BP_DIRECT	GO:0043087~regulation of GTPase activity	11	1.33333	0.00058647	SYDE2, EPHA5, FGD6, BCL6, RASA4, STMN3, EFNA5, FGD1, PRKG1, RASIP1, NGEF	753	65	16792	3.77387	0.850626	0.0358632	0.0349447
GOTERM_BP_DIRECT	GO:0043547~positive regulation of GTPase activity	52	6.30303	1.56671e-06	ITGB1, RASGRF2, DOCK8, ARRB1, RAPGEFL1, RGS5, RGS3, RASGEF1B, TAGAP, NEFL, RGS8, PLEKHG3, AXIN2, GFRA2, ARHGAP45, ADCYAP1, SFRP1, ARHGEF9, RASA4, AKAP9, CDC42EP2, ARHGEF3, ARHGEF2, RIN2, NGEF, HBEGF, SHC1, ARHGEF25, PIK3R2, DENND3, RASGRP2, KALRN, FGD1, ARHGAP12, GRIN2A, FGD6, CHN1, NCAM1, S100A10, RAP1GAP2, JUN, IQSEC2, IQSEC1, GRIN2B, GRIN1, GRIN2D, ARHGAP32, KITLG, DLG4, DLC1, RGS12, RGL1	753	565	16792	2.0524	0.00506485	0.000634714	0.000618459
GOTERM_BP_DIRECT	GO:0045471~response to ethanol	16	1.93939	6.61546e-05	ADCYAP1R1, VCAM1, SPARC, MAOB, MSTN, TRH, GATA3, SLC2A4, GRIN2B, GRIN1, NPPC, ADCYAP1, GRIN2A, PENK, CRH, CDO1	753	105	16792	3.39812	0.192986	0.00857629	0.00835665
GOTERM_BP_DIRECT	GO:0048010~vascular endothelial growth factor receptor signaling pathway	12	1.45455	0.000336337	NRP1, NRP2, NCF1, ROCK2, ABI1, KDR, HSPB1, PIK3R2, PRKD1, PIK3R1, SULF1, VEGFA	753	72	16792	3.71669	0.663868	0.0253505	0.0247012
GOTERM_BP_DIRECT	GO:0048013~ephrin receptor signaling pathway	13	1.57576	0.00043376	EPHA5, EPHA6, ROCK2, SDC2, ADAM10, EFNA5, KALRN, GRIN2B, GRIN1, EFNB2, EFNA3, CHN1, NGEF	753	86	16792	3.37095	0.754908	0.0286901	0.0279554
GOTERM_BP_DIRECT	GO:0048813~dendrite morphogenesis	9	1.09091	0.000189391	ITGB1, DSCAM, SEMA3A, SDC2, ABI1, MINK1, DTNBP1, LRP4, MAP6	753	37	16792	5.42436	0.458751	0.0153454	0.0149525
GOTERM_BP_DIRECT	GO:0048842~positive regulation of axon extension involved in axon guidance	5	0.606061	0.000125313	SEMA5A, NRP1, CXCL12, DSCAM, VEGFA	753	7	16792	15.9287	0.333801	0.0119453	0.0116394
GOTERM_BP_DIRECT	GO:0048843~negative regulation of axon extension involved in axon guidance	8	0.969697	0.000109465	SEMA5A, NRP1, SEMA7A, SEMA3A, SEMA4B, SEMA4C, SEMA3G, WNT3	753	26	16792	6.86158	0.298683	0.0112725	0.0109838
GOTERM_BP_DIRECT	GO:0050900~leukocyte migration	18	2.18182	3.06166e-05	ITGB1, SLC16A1, CXADR, ITGA4, SHC1, CAV1, FOXJ1, ATP1B3, PIK3R2, SLC7A11, PIK3R1, ATP1B1, GLG1, THBD, PODXL, PDE4B, GAS6, SLC16A3	753	122	16792	3.29018	0.0944655	0.00496142	0.00483436
GOTERM_BP_DIRECT	GO:0050919~negative chemotaxis	8	0.969697	0.00065514	SEMA5A, SEMA7A, NRP2, SEMA3A, SEMA4B, SEMA4C, SEMA3G, EFNA5	753	34	16792	5.24709	0.880448	0.0393205	0.0383136
GOTERM_BP_DIRECT	GO:0051056~regulation of small GTPase mediated signal transduction	19	2.30303	2.98781e-05	RAP1GAP2, RASGRF2, PIK3R2, KALRN, FGD1, ARHGAP45, RHOBTB2, ARHGAP12, SYDE2, ARHGAP32, ARHGEF9, DLC1, CHN1, RHOJ, TAGAP, ARHGEF3, ARHGEF2, RHOQ, NGEF	753	134	16792	3.16196	0.0922956	0.00496142	0.00483436
GOTERM_BP_DIRECT	GO:0051491~positive regulation of filopodium assembly	7	0.848485	0.000843087	TENM1, NLGN1, CCL21, PALM, NEURL1, FSCN1, RHOQ	753	26	16792	6.00388	0.935015	0.0463126	0.0451266
GOTERM_BP_DIRECT	GO:0051965~positive regulation of synapse assembly	12	1.45455	8.49193e-05	NLGN1, CLSTN2, LRRTM3, SLITRK1, SLITRK4, LRRTM2, ADGRB1, SYNDIG1, NRXN3, EFNA5, CBLN2, LRRC4B	753	62	16792	4.31615	0.240607	0.00945725	0.00921506
GOTERM_BP_DIRECT	GO:0051966~regulation of synaptic transmission, glutamatergic	7	0.848485	0.000414606	MEF2C, GRM5, GRM4, SERPINE2, SYT1, GRIK1, KALRN	753	23	16792	6.787	0.739204	0.0285902	0.027858
GOTERM_BP_DIRECT	GO:0061418~regulation of transcription from RNA polymerase II promoter in response to hypoxia	8	0.969697	0.000182211	EGLN1, EGR1, EGLN3, EGLN2, EPO, HIF1A, STOX1, VEGFA	753	28	16792	6.37147	0.446005	0.0151422	0.0147544
GOTERM_BP_DIRECT	GO:0070588~calcium ion transmembrane transport	18	2.18182	2.20341e-05	SLC24A4, TRPC5, SLC24A3, TRPA1, CACNA1B, ATP2A2, NALCN, CACNA1E, PKD1, SLC8A1, GRIN1, SLC8A3, CACNB2, GRIN2A, CACNG2, GAS6, CACNG3, ASIC1	753	119	16792	3.37313	0.0689229	0.00446328	0.00434898
GOTERM_BP_DIRECT	GO:0071320~cellular response to cAMP	11	1.33333	8.75401e-05	SLC8A3, CRHBP, AANAT, IGFBP5, PENK, AKAP9, EZR, SLC8A1, SLC5A5, ZFP36L1, AQP1	753	52	16792	4.71734	0.24703	0.00945725	0.00921506
GOTERM_BP_DIRECT	GO:0071526~semaphorin-plexin signaling pathway	9	1.09091	7.98143e-05	SEMA5A, NRP1, SEMA7A, SEMA3A, SEMA4B, SEMA4C, SEMA3G, MET, PLXNA4	753	33	16792	6.08185	0.227936	0.00945725	0.00921506
GOTERM_BP_DIRECT	GO:2000310~regulation of N-methyl-D-aspartate selective glutamate receptor activity	6	0.727273	0.000366694	CRHBP, MEF2C, NLGN1, DLG4, CRH, CNIH2	753	15	16792	8.92005	0.695375	0.025836	0.0251743
GOTERM_BP_DIRECT	GO:2000311~regulation of alpha-amino-3-hydroxy-5-methyl-4-isoxazole propionate selective glutamate receptor activity	7	0.848485	4.30391e-05	MEF2C, NLGN1, MINK1, CACNG2, CNIH2, CACNG3, CNIH3	753	16	16792	9.75631	0.130201	0.00598064	0.00582748
GOTERM_BP_DIRECT	GO:2001028~positive regulation of endothelial cell chemotaxis	4	0.484848	0.000835918	SEMA5A, HSPB1, PRKD1, MET	753	5	16792	17.8401	0.933486	0.0463126	0.0451266
GOTERM_BP_DIRECT	GO:0070373~negative regulation of ERK1 and ERK2 cascade	10	1.21212	0.00102533	SLC9A3R1, PTPRR, DUSP1, LMO3, SPRY4, FBLN1, ARRB1, EZR, NDRG2, DUSP6	753	58	16792	3.84485	0.96402	0.0518336	0.0505061
GOTERM_BP_DIRECT	GO:0032956~regulation of actin cytoskeleton organization	9	1.09091	0.00103936	EPHA5, LRP1, ROCK2, DLC1, FSCN1, EZR, EFNA5, PAM, RHOQ	753	47	16792	4.27024	0.965621	0.0518336	0.0505061
GOTERM_BP_DIRECT	GO:0006813~potassium ion transport	12	1.45455	0.00103955	SLC12A2, SLC24A4, KCNJ10, SLC24A3, KCNJ8, KCNJ13, KCNMA1, ATP1B4, ATP1B3, ATP1B1, KCNJ3, AQP1	753	82	16792	3.26343	0.965642	0.0518336	0.0505061
GOTERM_BP_DIRECT	GO:0034332~adherens junction organization	8	0.969697	0.0011158	CDH5, CDH4, CADM1, CDH11, CDH24, CDH13, PVR, NECTIN1	753	37	16792	4.82165	0.973172	0.0547924	0.0533892
GOTERM_BP_DIRECT	GO:0009612~response to mechanical stimulus	10	1.21212	0.00116272	MMP14, JUN, CXCL12, CITED2, IGFBP2, TXNIP, SOST, MEIS2, KALRN, DCN	753	59	16792	3.77968	0.976961	0.0562443	0.0548039
GOTERM_BP_DIRECT	GO:2000352~negative regulation of endothelial cell apoptotic process	7	0.848485	0.00127823	SEMA5A, SERPINE1, KDR, GATA3, ANGPTL4, GAS6, SCG2	753	28	16792	5.57503	0.984163	0.0609226	0.0593624
GOTERM_BP_DIRECT	GO:0060291~long-term synaptic potentiation	8	0.969697	0.00131568	SLC8A3, NLGN1, GRIN2A, SERPINE2, PLK2, LRRTM2, CRH, PTN	753	38	16792	4.69476	0.985975	0.0614107	0.059838
GOTERM_BP_DIRECT	GO:0007015~actin filament organization	11	1.33333	0.00132636	MYO1B, ACTN1, FSCN1, FAT1, CDC42EP2, ARHGEF2, ALDOA, PPP1R9A, PALM2-AKAP2, AKAP2, PACSIN1	753	72	16792	3.40696	0.986453	0.0614107	0.059838
GOTERM_BP_DIRECT	GO:0018105~peptidyl-serine phosphorylation	15	1.81818	0.00142043	MAST4, EPO, PRKCB, PRKCE, PLK2, PKD1, LATS2, CAMK4, MKNK2, PDK3, PRKCQ, PRKD1, SGK1, GAS6, STK32C	753	125	16792	2.67602	0.990017	0.0648302	0.0631699
GOTERM_BP_DIRECT	GO:0030208~dermatan sulfate biosynthetic process	5	0.606061	0.00148023	BCAN, NCAN, BGN, CSPG5, DCN	753	12	16792	9.29172	0.991778	0.0648302	0.0631699
GOTERM_BP_DIRECT	GO:0035641~locomotory exploration behavior	5	0.606061	0.00148023	DLG4, PRKCE, PENK, CRH, LSAMP	753	12	16792	9.29172	0.991778	0.0648302	0.0631699
GOTERM_BP_DIRECT	GO:0009190~cyclic nucleotide biosynthetic process	5	0.606061	0.00148023	NPR2, NPR3, ADCY2, ADCY1, ADCY8	753	12	16792	9.29172	0.991778	0.0648302	0.0631699
GOTERM_BP_DIRECT	GO:0030203~glycosaminoglycan metabolic process	7	0.848485	0.00155142	BCAN, NCAN, SDC2, BGN, CSPG5, HSPG2, DCN	753	29	16792	5.38279	0.993475	0.06616	0.0644657
GOTERM_BP_DIRECT	GO:0001937~negative regulation of endothelial cell proliferation	7	0.848485	0.00155142	SPARC, CAV1, NR2F2, APOE, SULF1, SCG2, XDH	753	29	16792	5.38279	0.993475	0.06616	0.0644657
GOTERM_BP_DIRECT	GO:0071474~cellular hyperosmotic response	4	0.484848	0.00161615	EPO, ARHGEF2, RCSD1, AQP1	753	6	16792	14.8668	0.994711	0.0680253	0.0662832
GOTERM_BP_DIRECT	GO:0031175~neuron projection development	13	1.57576	0.00168648	CNTNAP2, NLGN1, UNC5A, DTNBP1, STMN3, GDPD5, PPP1R9A, ADCYAP1, CLMN, GPRIN1, NPY, MICALL1, NCAM1	753	100	16792	2.89902	0.995791	0.0700755	0.0682809
GOTERM_BP_DIRECT	GO:0071277~cellular response to calcium ion	9	1.09091	0.00179842	CRHBP, MEF2C, JUN, SYT1, RASA4, CPNE7, CPNE2, ADCY1, RASGRP2	753	51	16792	3.93532	0.997073	0.0737808	0.0718913
GOTERM_BP_DIRECT	GO:0030036~actin cytoskeleton organization	15	1.81818	0.00206578	IQSEC2, IQSEC1, FHL3, FOXJ1, RND3, FGD1, SLC9A3R1, FGD6, BCL6, DLC1, RHOJ, ITPKA, FSCN1, CDC42EP2, PRKG1	753	130	16792	2.57309	0.998772	0.08369	0.0815467
GOTERM_BP_DIRECT	GO:0043627~response to estrogen	10	1.21212	0.00233107	MMP14, LDHA, GAL, MSTN, CITED2, EPO, CAV1, IGFBP2, CRH, GATA3	753	65	16792	3.43079	0.999481	0.0932716	0.0908829
GOTERM_BP_DIRECT	GO:0007595~lactation	8	0.969697	0.00240884	DDR1, CAV1, NEURL1, CDO1, HIF1A, PAM, XDH, VEGFA	753	42	16792	4.24764	0.999597	0.0952079	0.0927697
GOTERM_BP_DIRECT	GO:0060999~positive regulation of dendritic spine development	6	0.727273	0.00247782	NLGN1, PALM, NEURL1, APOE, CPEB3, PPP1R9A	753	22	16792	6.08185	0.999678	0.0967544	0.0942766
GOTERM_BP_DIRECT	GO:0030207~chondroitin sulfate catabolic process	5	0.606061	0.00278646	BCAN, NCAN, BGN, CSPG5, DCN	753	14	16792	7.96433	0.999882	0.106319	0.103596
GOTERM_BP_DIRECT	GO:0007417~central nervous system development	14	1.69697	0.00278837	CITED2, NCAN, GRIK1, NPAS2, ACAN, BCAN, PCP4, ZEB1, PTPRZ1, TIMP2, TAGLN3, SERPINI1, PAM, TIMP4	753	120	16792	2.60168	0.999883	0.106319	0.103596
GOTERM_BP_DIRECT	GO:0001558~regulation of cell growth	11	1.33333	0.00295745	DDR1, EGLN2, IGFBP5, TFRC, IGFBP3, IGFBP2, SPOCK1, PRKCQ, RASGRP2, SGK1, CTGF	753	80	16792	3.06627	0.999932	0.110173	0.107352
GOTERM_BP_DIRECT	GO:0001503~ossification	11	1.33333	0.00295745	NPPC, MINPP1, SPARC, RASSF2, NPR2, COL11A1, MGP, CDH11, IGF2, SOST, CTGF	753	80	16792	3.06627	0.999932	0.110173	0.107352
GOTERM_BP_DIRECT	GO:0035924~cellular response to vascular endothelial growth factor stimulus	6	0.727273	0.00305093	NRP1, VCAM1, KDR, HSPB1, PRKD1, VEGFA	753	23	16792	5.81743	0.99995	0.112365	0.109487
GOTERM_BP_DIRECT	GO:0043434~response to peptide hormone	8	0.969697	0.00316708	CXCL12, SPARC, ANXA1, ATP2A2, NEFL, TIMP4, CTGF, GNAI2	753	44	16792	4.05457	0.999966	0.115332	0.112378
GOTERM_BP_DIRECT	GO:0035023~regulation of Rho protein signal transduction	11	1.33333	0.00324199	PLEKHG3, ARHGEF9, FGD6, ARHGEF25, RASGRF2, DLC1, ARHGEF3, ARHGEF2, KALRN, FGD1, NGEF	753	81	16792	3.02841	0.999973	0.11618	0.113205
GOTERM_BP_DIRECT	GO:0001570~vasculogenesis	9	1.09091	0.00329793	GJC1, CITED2, CAV1, KDR, ACKR3, PITX2, RASIP1, ZFP36L1, VEGFA	753	56	16792	3.58395	0.999978	0.11618	0.113205
GOTERM_BP_DIRECT	GO:1903779~regulation of cardiac conduction	9	1.09091	0.00329793	SLC8A3, NPPC, NPR2, ATP2A2, ATP1B3, NOS1, TNNI3K, ATP1B1, SLC8A1	753	56	16792	3.58395	0.999978	0.11618	0.113205
GOTERM_BP_DIRECT	GO:0030336~negative regulation of cell migration	12	1.45455	0.00343349	OSBPL8, SLC9A3R1, PTPRU, SFRP1, TMEFF2, IGFBP5, CITED2, DLC1, SERPINE1, PTN, SULF1, ROBO1	753	95	16792	2.81686	0.999986	0.119655	0.116591
GOTERM_BP_DIRECT	GO:0001755~neural crest cell migration	8	0.969697	0.00360849	SEMA5A, SEMA7A, KITLG, SEMA3A, SEMA4B, SEMA4C, SEMA3G, HIF1A	753	45	16792	3.96447	0.999992	0.124416	0.12123
GOTERM_BP_DIRECT	GO:0001964~startle response	5	0.606061	0.00366638	GLRA1, GRIN2A, PENK, CSMD1, GRIN2D	753	15	16792	7.43338	0.999993	0.125081	0.121878
GOTERM_BP_DIRECT	GO:0051602~response to electrical stimulus	6	0.727273	0.0037138	MSTN, EPO, EEF1A2, AKAP9, S100A13, KCNJ3	753	24	16792	5.57503	0.999994	0.125379	0.122169
GOTERM_BP_DIRECT	GO:0010595~positive regulation of endothelial cell migration	8	0.969697	0.00409516	NRP1, NRP2, SPARC, ROCK2, KDR, GATA3, PRKD1, VEGFA	753	46	16792	3.87828	0.999998	0.133095	0.129687
GOTERM_BP_DIRECT	GO:0051591~response to cAMP	8	0.969697	0.00409516	THBD, LDHA, JUN, SPARC, VGF, DUSP1, CREM, CDO1	753	46	16792	3.87828	0.999998	0.133095	0.129687
GOTERM_BP_DIRECT	GO:0051592~response to calcium ion	9	1.09091	0.00411542	SPARC, AANAT, HOMER1, DUSP1, CAV1, KCNMA1, PENK, TXNIP, SLC6A1	753	58	16792	3.46037	0.999998	0.133095	0.129687
GOTERM_BP_DIRECT	GO:0050918~positive chemotaxis	7	0.848485	0.00422109	SEMA5A, NRP1, CXCL12, SAA1, SCG2, MET, VEGFA	753	35	16792	4.46003	0.999999	0.133095	0.129687
GOTERM_BP_DIRECT	GO:1904322~cellular response to forskolin	4	0.484848	0.00422981	EPHA5, ADCY2, ADCY1, EFNA5	753	8	16792	11.1501	0.999999	0.133095	0.129687
GOTERM_BP_DIRECT	GO:0010837~regulation of keratinocyte proliferation	4	0.484848	0.00422981	ZFP36, BCL11B, PRKD1, ZFP36L1	753	8	16792	11.1501	0.999999	0.133095	0.129687
GOTERM_BP_DIRECT	GO:0051963~regulation of synapse assembly	4	0.484848	0.00422981	MEF2C, PPP1R9A, GRIN1, NECTIN1	753	8	16792	11.1501	0.999999	0.133095	0.129687
GOTERM_BP_DIRECT	GO:0000226~microtubule cytoskeleton organization	10	1.21212	0.00428334	MAP1B, MAP1A, MAP7D2, MAP7, MAP6, MAP6D1, NEFL, MAPT, PHLDB2, EML1	753	71	16792	3.14086	0.999999	0.133484	0.130065
GOTERM_BP_DIRECT	GO:0030206~chondroitin sulfate biosynthetic process	6	0.727273	0.0044738	BCAN, CHST11, NCAN, BGN, CSPG5, DCN	753	25	16792	5.35203	1	0.138091	0.134555
GOTERM_BP_DIRECT	GO:0035162~embryonic hemopoiesis	5	0.606061	0.00471723	KITLG, TAL1, KDR, GATA3, HIF1A	753	16	16792	6.96879	1	0.144232	0.140538
GOTERM_BP_DIRECT	GO:0006928~movement of cell or subcellular component	11	1.33333	0.00500737	ADGRE5, CALD1, NPY, ABI1, PALM, ANOS1, CD9, HSPB1, VIM, TUBB4B, DNALI1	753	86	16792	2.85234	1	0.151672	0.147788
GOTERM_BP_DIRECT	GO:0045669~positive regulation of osteoblast differentiation	9	1.09091	0.00508074	NPPC, MEF2C, CEBPB, JAG1, CEBPD, FAM20C, PRKD1, CTHRC1, CD276	753	60	16792	3.34502	1	0.152469	0.148565
GOTERM_BP_DIRECT	GO:0035725~sodium ion transmembrane transport	10	1.21212	0.00515988	SLC8A3, SLC4A7, SLC24A4, SLC13A4, SLC24A3, NALCN, SCN4B, SLC8A1, SLC5A5, ASIC1	753	73	16792	3.05481	1	0.153423	0.149494
GOTERM_BP_DIRECT	GO:0061621~canonical glycolysis	6	0.727273	0.00533826	GPI, PFKFB4, PGK1, ENO1, ALDOA, PFKP	753	26	16792	5.14618	1	0.157285	0.153257
GOTERM_BP_DIRECT	GO:0007162~negative regulation of cell adhesion	7	0.848485	0.00560522	SEMA5A, DSCAM, PODXL, CLDN7, CDH13, ADAM10, FBLN1	753	37	16792	4.21894	1	0.163416	0.159231
GOTERM_BP_DIRECT	GO:0007584~response to nutrient	10	1.21212	0.00564721	LDHA, VCAM1, CCKAR, SST, UCP3, COX4I1, IGFBP2, LTA, SLC8A1, GNAI2	753	74	16792	3.01353	1	0.163416	0.159231
GOTERM_BP_DIRECT	GO:1903375~facioacoustic ganglion development	3	0.363636	0.00583003	NRP1, NRP2, SEMA3A	753	3	16792	22.3001	1	0.165747	0.161502
GOTERM_BP_DIRECT	GO:0021828~gonadotrophin-releasing hormone neuronal migration to the hypothalamus	3	0.363636	0.00583003	NRP1, NRP2, SEMA3A	753	3	16792	22.3001	1	0.165747	0.161502
GOTERM_BP_DIRECT	GO:0048265~response to pain	5	0.606061	0.00595292	TRPA1, CRH, CACNA1B, COMT, TAC1	753	17	16792	6.55886	1	0.166323	0.162063
GOTERM_BP_DIRECT	GO:0006171~cAMP biosynthetic process	5	0.606061	0.00595292	CALCRL, NPR3, ADCY2, ADCY1, ADCY8	753	17	16792	6.55886	1	0.166323	0.162063
GOTERM_BP_DIRECT	GO:0021612~facial nerve structural organization	4	0.484848	0.00613486	NRP1, NRP2, SEMA3A, PLXNA4	753	9	16792	9.91117	1	0.167085	0.162806
GOTERM_BP_DIRECT	GO:0021785~branchiomotor neuron axon guidance	4	0.484848	0.00613486	NRP1, SEMA3A, PLXNA1, PLXNA4	753	9	16792	9.91117	1	0.167085	0.162806
GOTERM_BP_DIRECT	GO:0008354~germ cell migration	4	0.484848	0.00613486	ITGB1, CXADR, PLPP3, PLPP1	753	9	16792	9.91117	1	0.167085	0.162806
GOTERM_BP_DIRECT	GO:0000902~cell morphogenesis	9	1.09091	0.00621026	TENM1, TENM3, TENM4, BCL6, PDPN, ARHGEF2, CLU, WNT3, KLF2	753	62	16792	3.23712	1	0.167729	0.163433
GOTERM_BP_DIRECT	GO:0007266~Rho protein signal transduction	8	0.969697	0.00655177	RTKN, BCL6, ROCK2, RHOJ, CDC42EP2, ARHGEF3, CDH13, KALRN	753	50	16792	3.56802	1	0.17549	0.170996
GOTERM_BP_DIRECT	GO:0030324~lung development	10	1.21212	0.00672783	CCDC39, MMP14, SPARC, PDPN, CRH, HES1, PTN, CTGF, JMJD6, VEGFA	753	76	16792	2.93423	1	0.177275	0.172736
GOTERM_BP_DIRECT	GO:0006816~calcium ion transport	10	1.21212	0.00672783	TRPC5, CALCRL, PRKCB, NPY, CAV1, CACHD1, CDH23, CACNG3, NALCN, RAMP1	753	76	16792	2.93423	1	0.177275	0.172736
GOTERM_BP_DIRECT	GO:0009611~response to wounding	9	1.09091	0.00684181	NRP1, ZFP36, GAP43, GRIN2A, NMNAT3, F2RL2, CTGF, ZFP36L1, SULF2	753	63	16792	3.18573	1	0.178825	0.174246
GOTERM_BP_DIRECT	GO:0000165~MAPK cascade	22	2.66667	0.00736641	MEF2C, KSR1, SHC1, RASGRF2, CAV1, GFRA2, GRIN2B, POU4F2, DUSP6, ZFP36L1, GRIN1, GRIN2D, ZFP36, GRIN2A, KITLG, RASA4, DLG4, AKAP9, NEFL, NCAM1, SCG2, HBEGF	753	262	16792	1.87253	1	0.187603	0.182798
GOTERM_BP_DIRECT	GO:0048169~regulation of long-term neuronal synaptic plasticity	5	0.606061	0.0073865	GRM5, KCNJ10, DLG4, GRIK2, GRIN1	753	18	16792	6.19448	1	0.187603	0.182798
GOTERM_BP_DIRECT	GO:0051412~response to corticosterone	5	0.606061	0.0073865	AANAT, MAOB, CRH, NEFL, TRH	753	18	16792	6.19448	1	0.187603	0.182798
GOTERM_BP_DIRECT	GO:0010107~potassium ion import	6	0.727273	0.00740919	KCNJ10, KCNJ8, KCNJ13, ATP1B3, ATP1B1, KCNJ3	753	28	16792	4.7786	1	0.187603	0.182798
GOTERM_BP_DIRECT	GO:0046426~negative regulation of JAK-STAT cascade	7	0.848485	0.00826426	LRRTM3, LRRTM4, RTN4RL1, CAV1, BGN, DCN, LRRC4B	753	40	16792	3.90252	1	0.207632	0.202314
GOTERM_BP_DIRECT	GO:0061564~axon development	4	0.484848	0.0084749	DDR1, GAP43, NEFL, NEFM	753	10	16792	8.92005	1	0.209265	0.203906
GOTERM_BP_DIRECT	GO:0001662~behavioral fear response	6	0.727273	0.00862955	ADCYAP1, GABRA5, PENK, CCK, GRIK2, KALRN	753	29	16792	4.61382	1	0.209265	0.203906
GOTERM_BP_DIRECT	GO:0030335~positive regulation of cell migration	17	2.06061	0.00864396	SEMA5A, SEMA7A, CEMIP, ATP8A1, SEMA4B, SEMA4C, SEMA3G, ADAM10, PIK3R1, MYLK, VEGFA, MMP14, MYO1C, PODXL, KDR, CDH13, HBEGF	753	184	16792	2.06034	1	0.209265	0.203906
GOTERM_BP_DIRECT	GO:1902476~chloride transmembrane transport	11	1.33333	0.00865211	SLC12A2, GLRA1, GABRP, GABRA1, GABRB1, SLC12A5, GABRA5, SLC4A2, SLC26A4, CLIC2, CLCN2	753	93	16792	2.63765	1	0.209265	0.203906
GOTERM_BP_DIRECT	GO:0006874~cellular calcium ion homeostasis	11	1.33333	0.00865211	SLC8A3, SLC24A4, CXCL12, SLC24A3, PRKCB, CAV1, ATP2A2, GRIK2, APOE, ATP1B1, GRIN1	753	93	16792	2.63765	1	0.209265	0.203906
GOTERM_BP_DIRECT	GO:0043523~regulation of neuron apoptotic process	5	0.606061	0.00903008	MEF2C, EGLN3, GRM4, EGLN2, GATA3	753	19	16792	5.86846	1	0.216789	0.211237
GOTERM_BP_DIRECT	GO:0045773~positive regulation of axon extension	6	0.727273	0.0099821	SEMA7A, TRPC5, CDH4, MAP1B, MAPT, NTN1	753	30	16792	4.46003	1	0.236146	0.230098
GOTERM_BP_DIRECT	GO:0051017~actin filament bundle assembly	6	0.727273	0.0099821	EPS8, MYO1B, SWAP70, ACTN1, FSCN1, EZR	753	30	16792	4.46003	1	0.236146	0.230098
GOTERM_BP_DIRECT	GO:0009615~response to virus	12	1.45455	0.0102833	IVNS1ABP, IFIH1, MEF2C, CXCL12, BTBD17, RSAD2, IFI44, HSPB1, CXCR4, GATA3, ENO1, CLU	753	110	16792	2.43274	1	0.241509	0.235324
GOTERM_BP_DIRECT	GO:0071456~cellular response to hypoxia	11	1.33333	0.010726	ERO1A, SLC8A3, SFRP1, PRKCE, PTN, SLC2A4, HIF1A, SLC8A1, ZFP36L1, AQP1, VEGFA	753	96	16792	2.55522	1	0.250093	0.243689
GOTERM_BP_DIRECT	GO:0043249~erythrocyte maturation	4	0.484848	0.0112694	HBZ, TAL1, EPO, KLF2	753	11	16792	8.10914	1	0.251158	0.244726
GOTERM_BP_DIRECT	GO:0097491~sympathetic neuron projection guidance	3	0.363636	0.0113141	NRP1, NRP2, SEMA3A	753	4	16792	16.7251	1	0.251158	0.244726
GOTERM_BP_DIRECT	GO:0097490~sympathetic neuron projection extension	3	0.363636	0.0113141	NRP1, NRP2, SEMA3A	753	4	16792	16.7251	1	0.251158	0.244726
GOTERM_BP_DIRECT	GO:1902285~semaphorin-plexin signaling pathway involved in neuron projection guidance	3	0.363636	0.0113141	NRP1, NRP2, SEMA3A	753	4	16792	16.7251	1	0.251158	0.244726
GOTERM_BP_DIRECT	GO:0036486~ventral trunk neural crest cell migration	3	0.363636	0.0113141	NRP1, NRP2, SEMA3A	753	4	16792	16.7251	1	0.251158	0.244726
GOTERM_BP_DIRECT	GO:0097113~AMPA glutamate receptor clustering	3	0.363636	0.0113141	NLGN1, DLG4, APOE	753	4	16792	16.7251	1	0.251158	0.244726
GOTERM_BP_DIRECT	GO:0051447~negative regulation of meiotic cell cycle	3	0.363636	0.0113141	NPPC, DUSP1, NPR2	753	4	16792	16.7251	1	0.251158	0.244726
GOTERM_BP_DIRECT	GO:0051897~positive regulation of protein kinase B signaling	10	1.21212	0.0126981	SEMA5A, OSBPL8, TCF7L2, IGFBP5, CCL21, IGF2, GATA3, GAS6, STOX1, HBEGF	753	84	16792	2.65478	1	0.279963	0.272794
GOTERM_BP_DIRECT	GO:0048167~regulation of synaptic plasticity	6	0.727273	0.0131088	MEF2C, VGF, PLK2, ITPKA, NCAM1, CPEB3	753	32	16792	4.18127	1	0.286187	0.278858
GOTERM_BP_DIRECT	GO:0006469~negative regulation of protein kinase activity	11	1.33333	0.013157	LRRTM3, CAMK2N1, LRRTM4, RTN4RL1, CAMK2N2, BGN, HSPB1, TRIB2, PPM1E, DCN, LRRC4B	753	99	16792	2.47779	1	0.286187	0.278858
GOTERM_BP_DIRECT	GO:0060041~retina development in camera-type eye	8	0.969697	0.014519	RP1L1, TUB, LAMB2, SERPINF1, CLCN2, POU4F2, JMJD6, NECTIN1	753	58	16792	3.07588	1	0.307841	0.299957
GOTERM_BP_DIRECT	GO:0048846~axon extension involved in axon guidance	4	0.484848	0.0145325	NRP1, NRP2, ALCAM, SEMA3A	753	12	16792	7.43338	1	0.307841	0.299957
GOTERM_BP_DIRECT	GO:1902287~semaphorin-plexin signaling pathway involved in axon guidance	4	0.484848	0.0145325	NRP1, SEMA3A, PLXNA1, PLXNA4	753	12	16792	7.43338	1	0.307841	0.299957
GOTERM_BP_DIRECT	GO:0030195~negative regulation of blood coagulation	4	0.484848	0.0145325	THBD, SERPINE2, SERPINE1, APOE	753	12	16792	7.43338	1	0.307841	0.299957
GOTERM_BP_DIRECT	GO:0050808~synapse organization	6	0.727273	0.0148949	NLGN1, NLGN4X, LRRTM4, LRRTM2, LRP4, SNCG	753	33	16792	4.05457	1	0.313469	0.305442
GOTERM_BP_DIRECT	GO:0016337~single organismal cell-cell adhesion	11	1.33333	0.0149933	CDH5, PTPRU, VCAM1, SHC1, ZAN, PDPN, FAT1, CDH24, PKD1, NTN1, NECTIN1	753	101	16792	2.42873	1	0.313505	0.305476
GOTERM_BP_DIRECT	GO:0007214~gamma-aminobutyric acid signaling pathway	5	0.606061	0.0153269	SLC12A2, GABRA1, GABRA5, PLCL2, GNAI2	753	22	16792	5.06821	1	0.316399	0.308296
GOTERM_BP_DIRECT	GO:0001502~cartilage condensation	5	0.606061	0.0153269	ACAN, COL11A1, MGP, PKD1, CTGF	753	22	16792	5.06821	1	0.316399	0.308296
GOTERM_BP_DIRECT	GO:0043524~negative regulation of neuron apoptotic process	13	1.57576	0.0154325	GPI, NRP1, JUN, MEF2C, CEBPB, LRP1, GABRA5, STXBP1, VSTM2L, GRIK2, GRIN1, NEFL, APOE	753	132	16792	2.19623	1	0.316562	0.308455
GOTERM_BP_DIRECT	GO:0003151~outflow tract morphogenesis	7	0.848485	0.0160994	TGFBR3, MEF2C, JUN, CITED2, HES1, HIF1A, VEGFA	753	46	16792	3.3935	1	0.328164	0.31976
GOTERM_BP_DIRECT	GO:0007568~aging	15	1.81818	0.0164158	SLC12A2, JUN, VCAM1, IGFBP5, LRP1, SLC32A1, EPO, SERPINF1, IGFBP2, PPP1R9A, DCN, CTGF, UCP3, PENK, TIMP2	753	165	16792	2.02728	1	0.332523	0.324008
GOTERM_BP_DIRECT	GO:0002576~platelet degranulation	11	1.33333	0.017014	SPARC, ACTN1, STXBP1, SERPINE1, IGF2, CD9, PHACTR2, ALDOA, GAS6, CLU, VEGFA	753	103	16792	2.38157	1	0.335079	0.326498
GOTERM_BP_DIRECT	GO:0042102~positive regulation of T cell proliferation	8	0.969697	0.0172804	VCAM1, ANXA1, TFRC, HES1, PRKCQ, BTNL2, VTCN1, CD276	753	60	16792	2.97335	1	0.335079	0.326498
GOTERM_BP_DIRECT	GO:0007193~adenylate cyclase-inhibiting G-protein coupled receptor signaling pathway	7	0.848485	0.0177778	GPR37, NPR3, ADCY2, GPR37L1, ADCY1, ADCY8, GNAI2	753	47	16792	3.3213	1	0.335079	0.326498
GOTERM_BP_DIRECT	GO:0031532~actin cytoskeleton reorganization	7	0.848485	0.0177778	EPS8, CXADR, ANXA1, SHC1, MINK1, DTNBP1, EZR	753	47	16792	3.3213	1	0.335079	0.326498
GOTERM_BP_DIRECT	GO:0048754~branching morphogenesis of an epithelial tube	5	0.606061	0.0179114	MMP14, MET, PKD1, RASIP1, VEGFA	753	23	16792	4.84785	1	0.335079	0.326498
GOTERM_BP_DIRECT	GO:0043278~response to morphine	5	0.606061	0.0179114	GPI, PRKCE, PENK, TAC1, GRIN1	753	23	16792	4.84785	1	0.335079	0.326498
GOTERM_BP_DIRECT	GO:0007565~female pregnancy	10	1.21212	0.0180312	THBD, CRHBP, ADCYAP1, HSD11B2, IGFBP5, PSG4, IGFBP2, CRH, COMT, SLC38A3	753	89	16792	2.50563	1	0.335079	0.326498
GOTERM_BP_DIRECT	GO:0010952~positive regulation of peptidase activity	4	0.484848	0.0182733	MMP14, CAV1, FBLN1, PCOLCE	753	13	16792	6.86158	1	0.335079	0.326498
GOTERM_BP_DIRECT	GO:0050806~positive regulation of synaptic transmission	4	0.484848	0.0182733	CLSTN2, SYT1, DLG4, GRIK2	753	13	16792	6.86158	1	0.335079	0.326498
GOTERM_BP_DIRECT	GO:0050901~leukocyte tethering or rolling	4	0.484848	0.0182733	ITGB1, VCAM1, PODXL2, ITGA4	753	13	16792	6.86158	1	0.335079	0.326498
GOTERM_BP_DIRECT	GO:0042420~dopamine catabolic process	3	0.363636	0.0182996	MAOB, MAOA, COMT	753	5	16792	13.3801	1	0.335079	0.326498
GOTERM_BP_DIRECT	GO:0035860~glial cell-derived neurotrophic factor receptor signaling pathway	3	0.363636	0.0182996	SULF1, GFRA2, SULF2	753	5	16792	13.3801	1	0.335079	0.326498
GOTERM_BP_DIRECT	GO:0021637~trigeminal nerve structural organization	3	0.363636	0.0182996	NRP1, SEMA3A, PLXNA4	753	5	16792	13.3801	1	0.335079	0.326498
GOTERM_BP_DIRECT	GO:2000987~positive regulation of behavioral fear response	3	0.363636	0.0182996	MEF2C, PENK, CRH	753	5	16792	13.3801	1	0.335079	0.326498
GOTERM_BP_DIRECT	GO:0060666~dichotomous subdivision of terminal units involved in salivary gland branching	3	0.363636	0.0182996	NRP1, SEMA3A, PLXNA1	753	5	16792	13.3801	1	0.335079	0.326498
GOTERM_BP_DIRECT	GO:1901166~neural crest cell migration involved in autonomic nervous system development	3	0.363636	0.0182996	NRP1, NRP2, SEMA3A	753	5	16792	13.3801	1	0.335079	0.326498
GOTERM_BP_DIRECT	GO:0061551~trigeminal ganglion development	3	0.363636	0.0182996	NRP1, NRP2, SEMA3A	753	5	16792	13.3801	1	0.335079	0.326498
GOTERM_BP_DIRECT	GO:0017158~regulation of calcium ion-dependent exocytosis	6	0.727273	0.0189393	SYT2, DOC2A, SYT1, SYT14, C2CD4C, SYT9	753	35	16792	3.82288	1	0.344844	0.336012
GOTERM_BP_DIRECT	GO:0035176~social behavior	7	0.848485	0.0195724	CNTNAP2, NLGN4X, PTCHD1, DLG4, NRXN3, KALRN, GRIN1	753	48	16792	3.2521	1	0.352413	0.343388
GOTERM_BP_DIRECT	GO:0048812~neuron projection morphogenesis	7	0.848485	0.0195724	KIRREL3, DTNBP1, NEFL, MINOS1-NBL1, NYAP2, SGK1, PACSIN1	753	48	16792	3.2521	1	0.352413	0.343388
GOTERM_BP_DIRECT	GO:0022617~extracellular matrix disassembly	9	1.09091	0.0201287	ACAN, BCAN, MMP14, GSN, MMP15, TIMP2, ADAM10, HSPG2, DCN	753	76	16792	2.64081	1	0.360426	0.351196
GOTERM_BP_DIRECT	GO:0048675~axon extension	5	0.606061	0.0207509	ITGB1, SEMA7A, MAP1B, MAPT, POU4F2	753	24	16792	4.64586	1	0.367506	0.358094
GOTERM_BP_DIRECT	GO:0008306~associative learning	5	0.606061	0.0207509	GABRA5, CRH, NPTX2, TAC1, ASIC1	753	24	16792	4.64586	1	0.367506	0.358094
GOTERM_BP_DIRECT	GO:0030177~positive regulation of Wnt signaling pathway	6	0.727273	0.0212073	SFRP1, SALL1, SULF1, WNT3, WLS, SULF2	753	36	16792	3.71669	1	0.373549	0.363982
GOTERM_BP_DIRECT	GO:0014912~negative regulation of smooth muscle cell migration	4	0.484848	0.022497	IGFBP5, LRP1, IGFBP3, SERPINE1	753	14	16792	6.37147	1	0.385782	0.375903
GOTERM_BP_DIRECT	GO:0009607~response to biotic stimulus	4	0.484848	0.022497	PRRT1, SYNDIG1L, PRRT2, SYNDIG1	753	14	16792	6.37147	1	0.385782	0.375903
GOTERM_BP_DIRECT	GO:0090303~positive regulation of wound healing	4	0.484848	0.022497	ANXA1, PRKCE, MYLK, HBEGF	753	14	16792	6.37147	1	0.385782	0.375903
GOTERM_BP_DIRECT	GO:0021794~thalamus development	4	0.484848	0.022497	CNTNAP2, PTCHD1, TAL2, PTN	753	14	16792	6.37147	1	0.385782	0.375903
GOTERM_BP_DIRECT	GO:0071625~vocalization behavior	4	0.484848	0.022497	CNTNAP2, NLGN4X, DLG4, NRXN3	753	14	16792	6.37147	1	0.385782	0.375903
GOTERM_BP_DIRECT	GO:0045666~positive regulation of neuron differentiation	9	1.09091	0.0231736	MEF2C, GPRC5B, ZEB1, BCL6, TIMP2, MINOS1-NBL1, MMD2, GDPD5, BRINP3	753	78	16792	2.57309	1	0.395293	0.38517
GOTERM_BP_DIRECT	GO:0051899~membrane depolarization	5	0.606061	0.0238513	JUN, CAV1, CACNA1B, CACNG2, CACNA1E	753	25	16792	4.46003	1	0.404722	0.394357
GOTERM_BP_DIRECT	GO:0071356~cellular response to tumor necrosis factor	11	1.33333	0.0256821	CRHBP, ZFP36, SFRP1, VCAM1, PID1, CCL21, GATA3, SLC2A4, ARHGEF2, KLF2, ZFP36L1	753	110	16792	2.23001	1	0.430372	0.419351
GOTERM_BP_DIRECT	GO:0051384~response to glucocorticoid	8	0.969697	0.0257613	HSD11B2, PTPRU, SPARC, DUSP1, UCP3, IGFBP2, CDO1, PAM	753	65	16792	2.74463	1	0.430372	0.419351
GOTERM_BP_DIRECT	GO:0008217~regulation of blood pressure	8	0.969697	0.0257613	EDNRA, NPR2, NPY, NPR3, CACNA1B, SGK1, TAC1, TRHDE	753	65	16792	2.74463	1	0.430372	0.419351
GOTERM_BP_DIRECT	GO:0045944~positive regulation of transcription from RNA polymerase II promoter	58	7.0303	0.0260353	CSRNP1, CSRNP3, PID1, CITED2, SERPINE1, ARRB1, LDB2, PKD1, SALL1, NOS1, PITX2, LMO1, KLF12, MEF2C, ATP1B4, EBF3, DCN, ADCYAP1, GAL, ZEB1, PAX7, TAL1, RBM14-RBM4, CDH13, PRKD1, ARHGEF2, ATF5, MET, RHOQ, CEBPB, HLF, CEBPD, SHOX2, CREM, PIK3R2, PIK3R1, GATA3, HIF1A, NPAS2, GLIS2, RAI1, NEUROD6, HES1, OTX1, EGLN1, TCF7L2, EGR1, JUN, JAG1, BCL11B, NR2F1, FOXJ1, MEIS2, POU4F2, KLF2, GRIN1, VEGFA, SSBP2	753	981	16792	1.31846	1	0.43272	0.421638
GOTERM_BP_DIRECT	GO:0034109~homotypic cell-cell adhesion	3	0.363636	0.0266413	PTPRU, CXADR, PLPP3	753	6	16792	11.1501	1	0.436084	0.424916
GOTERM_BP_DIRECT	GO:1901018~positive regulation of potassium ion transmembrane transporter activity	3	0.363636	0.0266413	AKAP9, ATP1B3, ATP1B1	753	6	16792	11.1501	1	0.436084	0.424916
GOTERM_BP_DIRECT	GO:1900042~positive regulation of interleukin-2 secretion	3	0.363636	0.0266413	BTNL2, VTCN1, CD276	753	6	16792	11.1501	1	0.436084	0.424916
GOTERM_BP_DIRECT	GO:0010633~negative regulation of epithelial cell migration	4	0.484848	0.0272047	PTPRR, SEMA3A, MCC, PTPRG	753	15	16792	5.9467	1	0.438861	0.427622
GOTERM_BP_DIRECT	GO:0032793~positive regulation of CREB transcription factor activity	4	0.484848	0.0272047	EPHA5, CAMK1D, PRKD1, VEGFA	753	15	16792	5.9467	1	0.438861	0.427622
GOTERM_BP_DIRECT	GO:0006836~neurotransmitter transport	5	0.606061	0.0272173	SLC6A13, SLC17A6, SLC6A11, SLC6A1, SLC6A20	753	26	16792	4.28849	1	0.438861	0.427622
GOTERM_BP_DIRECT	GO:0051260~protein homooligomerization	15	1.81818	0.0281298	COLEC12, SLC22A6, NLGN1, SYT1, CAV1, SLC1A1, KCTD1, SLC6A1, KCTD4, SCUBE3, GLRA1, RNF213, ANGPTL4, PAM, KCTD15	753	177	16792	1.88984	1	0.451329	0.439771
GOTERM_BP_DIRECT	GO:0043410~positive regulation of MAPK cascade	9	1.09091	0.0283266	GRM4, GPR37, KSR1, PRKCE, IGFBP3, TIMP2, IGF2, KDR, GPR37L1	753	81	16792	2.47779	1	0.452248	0.440667
GOTERM_BP_DIRECT	GO:0048791~calcium ion-regulated exocytosis of neurotransmitter	6	0.727273	0.0290452	SYT2, DOC2A, SYT1, SYT14, C2CD4C, SYT9	753	39	16792	3.43079	1	0.461448	0.449631
GOTERM_BP_DIRECT	GO:0050731~positive regulation of peptidyl-tyrosine phosphorylation	9	1.09091	0.030207	NRP1, KITLG, IGF2, LRP4, CCK, ARHGEF2, PLPP3, EFNA5, VEGFA	753	82	16792	2.44758	1	0.477566	0.465336
GOTERM_BP_DIRECT	GO:0035987~endodermal cell differentiation	5	0.606061	0.0308525	MMP14, ITGA4, MMP15, COL11A1, COL12A1	753	27	16792	4.12965	1	0.483058	0.470688
GOTERM_BP_DIRECT	GO:0014065~phosphatidylinositol 3-kinase signaling	5	0.606061	0.0308525	PIK3R2, GATA3, PIK3R1, NYAP2, ZFP36L1	753	27	16792	4.12965	1	0.483058	0.470688
GOTERM_BP_DIRECT	GO:0007409~axonogenesis	10	1.21212	0.0314516	LRFN5, CCKAR, LINGO3, PTPRZ1, LRRN2, SLITRK1, SLITRK4, ADGRB1, CCK, ADCY1	753	98	16792	2.27552	1	0.490071	0.477521
GOTERM_BP_DIRECT	GO:0060292~long term synaptic depression	4	0.484848	0.0323941	GRIA1, PLK2, STXBP1, GRID2IP	753	16	16792	5.57503	1	0.49758	0.484837
GOTERM_BP_DIRECT	GO:0030279~negative regulation of ossification	4	0.484848	0.0323941	MEF2C, SFRP1, LRP4, SOST	753	16	16792	5.57503	1	0.49758	0.484837
GOTERM_BP_DIRECT	GO:0016486~peptide hormone processing	4	0.484848	0.0323941	PCSK1, ECE1, ECE2, PCSK5	753	16	16792	5.57503	1	0.49758	0.484837
GOTERM_BP_DIRECT	GO:0007229~integrin-mediated signaling pathway	10	1.21212	0.0332811	ITGB1, SEMA7A, ITGA4, ADAMTS1, ADAM12, ADAM10, FBLN1, ITGAE, PRKD1, CTGF	753	99	16792	2.25254	1	0.508793	0.495763
GOTERM_BP_DIRECT	GO:0030168~platelet activation	11	1.33333	0.0335569	PRKCB, ACTN1, PRKCE, PDPN, SAA1, CD9, PRKCQ, ARRB1, PIK3R1, GAS6, F2RL2	753	115	16792	2.13306	1	0.510601	0.497524
GOTERM_BP_DIRECT	GO:0007626~locomotory behavior	9	1.09091	0.0342213	GRM5, GPRC5B, OLFM2, DSCAM, TAL1, CACNA1B, CDH23, SOBP, ZNF385A	753	84	16792	2.3893	1	0.518276	0.505004
GOTERM_BP_DIRECT	GO:0007528~neuromuscular junction development	5	0.606061	0.0347598	CACNB2, LAMB2, ZC4H2, CACNG2, PDZRN3	753	28	16792	3.98217	1	0.521558	0.508201
GOTERM_BP_DIRECT	GO:0060079~excitatory postsynaptic potential	5	0.606061	0.0347598	MEF2C, GRIN2A, GRIK2, PPP1R9A, GRIN1	753	28	16792	3.98217	1	0.521558	0.508201
GOTERM_BP_DIRECT	GO:0070527~platelet aggregation	6	0.727273	0.0351654	ACTN1, STXBP1, HSPB1, SLC7A11, GAS6, MYL9	753	41	16792	3.26343	1	0.525212	0.511761
GOTERM_BP_DIRECT	GO:0060253~negative regulation of glial cell proliferation	3	0.363636	0.0362042	ADCYAP1, HES1, PTN	753	7	16792	9.5572	1	0.53087	0.517275
GOTERM_BP_DIRECT	GO:0010882~regulation of cardiac muscle contraction by calcium ion signaling	3	0.363636	0.0362042	ATP2A2, ATP1B1, SLC8A1	753	7	16792	9.5572	1	0.53087	0.517275
GOTERM_BP_DIRECT	GO:1902004~positive regulation of beta-amyloid formation	3	0.363636	0.0362042	LRRTM3, APOE, CLU	753	7	16792	9.5572	1	0.53087	0.517275
GOTERM_BP_DIRECT	GO:0048841~regulation of axon extension involved in axon guidance	3	0.363636	0.0362042	SEMA3A, PLXNA1, PLXNA4	753	7	16792	9.5572	1	0.53087	0.517275
GOTERM_BP_DIRECT	GO:0098609~cell-cell adhesion	20	2.42424	0.0363632	AHNAK, SWAP70, ENO1, UNC5D, BZW2, MPP7, CNN3, SLC9A3R2, LDHA, MYO1B, KRT18, CALD1, MICALL1, ABI1, FSCN1, EXOC3, ALDOA, PHLDB2, PFKP, PLEC	753	271	16792	1.64577	1	0.53087	0.517275
GOTERM_BP_DIRECT	GO:0033138~positive regulation of peptidyl-serine phosphorylation	8	0.969697	0.036718	TENM1, CAV1, AKAP9, ARRB1, PRKD1, GAS6, STOX1, VEGFA	753	70	16792	2.54859	1	0.533646	0.519979
GOTERM_BP_DIRECT	GO:0042593~glucose homeostasis	10	1.21212	0.0371579	GPI, TCF7L2, GPRC5B, SLC16A1, IGFBP5, VGF, LEPR, SLC2A4, HIF1A, CSMD1	753	101	16792	2.20793	1	0.535239	0.521531
GOTERM_BP_DIRECT	GO:0007218~neuropeptide signaling pathway	10	1.21212	0.0371579	TENM1, ADCYAP1, GLRA1, NPB, GAL, NPY, PENK, CARTPT, PDYN, TAC1	753	101	16792	2.20793	1	0.535239	0.521531
GOTERM_BP_DIRECT	GO:0007267~cell-cell signaling	19	2.30303	0.0374621	SEMA5A, PCSK1, NRP1, CCL21, ADAM10, TRH, CARTPT, ECE2, TRHDE, PCSK5, CTGF, EFNB2, ADCYAP1, EFNA3, ADGRE5, SST, LTA, FAT1, TAC1	753	254	16792	1.66812	1	0.537049	0.523295
GOTERM_BP_DIRECT	GO:0051497~negative regulation of stress fiber assembly	4	0.484848	0.0380601	TMEFF2, DLC1, PPP1R9A, PHLDB2	753	17	16792	5.24709	1	0.537049	0.523295
GOTERM_BP_DIRECT	GO:1901216~positive regulation of neuron death	4	0.484848	0.0380601	PPP1R13B, DDIT4, APOE, CLU	753	17	16792	5.24709	1	0.537049	0.523295
GOTERM_BP_DIRECT	GO:0021987~cerebral cortex development	7	0.848485	0.0384654	CNTNAP2, LRP1, NPY, NEFL, FAT4, HIF1A, GRIN1	753	56	16792	2.78752	1	0.537049	0.523295
GOTERM_BP_DIRECT	GO:0009725~response to hormone	6	0.727273	0.0385018	TUB, MMP14, RBM14-RBM4, TIMP2, PITX2, TAC1	753	42	16792	3.18573	1	0.537049	0.523295
GOTERM_BP_DIRECT	GO:0090002~establishment of protein localization to plasma membrane	6	0.727273	0.0385018	SLC9A3R1, CACNB2, ROCK2, EZR, S100A10, PACSIN1	753	42	16792	3.18573	1	0.537049	0.523295
GOTERM_BP_DIRECT	GO:0001541~ovarian follicle development	6	0.727273	0.0385018	ADCYAP1, MMP14, CEBPB, KITLG, VGF, VEGFA	753	42	16792	3.18573	1	0.537049	0.523295
GOTERM_BP_DIRECT	GO:0048662~negative regulation of smooth muscle cell proliferation	5	0.606061	0.0389406	IGFBP5, IGFBP3, NPR3, COMT, NDRG2	753	29	16792	3.84485	1	0.537049	0.523295
GOTERM_BP_DIRECT	GO:0060412~ventricular septum morphogenesis	5	0.606061	0.0389406	EGLN1, TGFBR3, CITED2, HES1, PITX2	753	29	16792	3.84485	1	0.537049	0.523295
GOTERM_BP_DIRECT	GO:0071549~cellular response to dexamethasone stimulus	5	0.606061	0.0389406	MSTN, SERPINF1, DDIT4, CRH, AQP1	753	29	16792	3.84485	1	0.537049	0.523295
GOTERM_BP_DIRECT	GO:0001501~skeletal system development	12	1.45455	0.043832	JAG2, ACAN, BCAN, RAI1, RASSF2, NCAN, CDH11, NPR3, COL12A1, SHOX2, SHOX, IGF2	753	137	16792	1.9533	1	0.596814	0.58153
GOTERM_BP_DIRECT	GO:0060384~innervation	4	0.484848	0.0441948	SERPINE2, GABRA5, SULF1, SULF2	753	18	16792	4.95559	1	0.596814	0.58153
GOTERM_BP_DIRECT	GO:0001709~cell fate determination	4	0.484848	0.0441948	JAG1, PTCH2, GATA3, MCL1	753	18	16792	4.95559	1	0.596814	0.58153
GOTERM_BP_DIRECT	GO:1903861~positive regulation of dendrite extension	4	0.484848	0.0441948	CPNE9, SYT2, CPNE5, SYT1	753	18	16792	4.95559	1	0.596814	0.58153
GOTERM_BP_DIRECT	GO:0006970~response to osmotic stress	4	0.484848	0.0441948	PLK3, KCNMA1, SLC2A1, MAP7	753	18	16792	4.95559	1	0.596814	0.58153
GOTERM_BP_DIRECT	GO:0007517~muscle organ development	9	1.09091	0.0457965	MEF2C, CENPF, TAGLN, ZFHX3, MSTN, USP2, SPEG, FHL3, HBEGF	753	89	16792	2.25507	1	0.612422	0.596738
GOTERM_BP_DIRECT	GO:0042698~ovulation cycle	3	0.363636	0.0468623	GABRB1, SERPINF1, TIMP4	753	8	16792	8.36255	1	0.612422	0.596738
GOTERM_BP_DIRECT	GO:0042135~neurotransmitter catabolic process	3	0.363636	0.0468623	MAOB, MAOA, COMT	753	8	16792	8.36255	1	0.612422	0.596738
GOTERM_BP_DIRECT	GO:0071305~cellular response to vitamin D	3	0.363636	0.0468623	SFRP1, PENK, PTN	753	8	16792	8.36255	1	0.612422	0.596738
GOTERM_BP_DIRECT	GO:0098909~regulation of cardiac muscle cell action potential involved in regulation of contraction	3	0.363636	0.0468623	CAV1, AKAP9, ATP2A2	753	8	16792	8.36255	1	0.612422	0.596738
GOTERM_BP_DIRECT	GO:0040036~regulation of fibroblast growth factor receptor signaling pathway	3	0.363636	0.0468623	FAM20C, SULF1, DUSP6	753	8	16792	8.36255	1	0.612422	0.596738
GOTERM_BP_DIRECT	GO:0060012~synaptic transmission, glycinergic	3	0.363636	0.0468623	GLRA1, SLC6A9, SLC6A20	753	8	16792	8.36255	1	0.612422	0.596738
GOTERM_BP_DIRECT	GO:0034695~response to prostaglandin E	3	0.363636	0.0468623	TGFBR3, AANAT, CCL21	753	8	16792	8.36255	1	0.612422	0.596738
GOTERM_BP_DIRECT	GO:0007205~protein kinase C-activating G-protein coupled receptor signaling pathway	5	0.606061	0.048125	GRM5, GAP43, LRP1, CCK, PLPP1	753	31	16792	3.5968	1	0.626399	0.610357
GOTERM_BP_DIRECT	GO:0032870~cellular response to hormone stimulus	6	0.727273	0.0496366	LOC102724428, JUN, DUSP1, UCP3, GPR22, IGFBP2	753	45	16792	2.97335	1	0.643489	0.62701
GOTERM_BP_DIRECT	GO:0031290~retinal ganglion cell axon guidance	4	0.484848	0.0507882	NRP1, ALCAM, EFNA5, POU4F2	753	19	16792	4.69476	1	0.645508	0.628977
GOTERM_BP_DIRECT	GO:0045879~negative regulation of smoothened signaling pathway	4	0.484848	0.0507882	SERPINE2, PTCH2, GPR37L1, GLIS2	753	19	16792	4.69476	1	0.645508	0.628977
GOTERM_BP_DIRECT	GO:0006883~cellular sodium ion homeostasis	4	0.484848	0.0507882	ATP1B3, ATP1B1, SGK1, SLC8A1	753	19	16792	4.69476	1	0.645508	0.628977
GOTERM_BP_DIRECT	GO:0030220~platelet formation	4	0.484848	0.0507882	MEF2C, TAL1, ACTN1, ZNF385A	753	19	16792	4.69476	1	0.645508	0.628977
GOTERM_BP_DIRECT	GO:0060122~inner ear receptor stereocilium organization	4	0.484848	0.0507882	CDH23, HES1, FAT4, CTHRC1	753	19	16792	4.69476	1	0.645508	0.628977
GOTERM_BP_DIRECT	GO:0070374~positive regulation of ERK1 and ERK2 cascade	14	1.69697	0.0511601	NRP1, SEMA7A, JUN, CCL21, EPO, ARRB1, CTGF, VEGFA, ADCYAP1, GLIPR2, GPR183, KDR, ACKR3, GAS6	753	175	16792	1.78401	1	0.647695	0.631108
GOTERM_BP_DIRECT	GO:0048666~neuron development	6	0.727273	0.0537265	EPHA5, TENM1, MEF2C, TENM3, TENM4, PACSIN1	753	46	16792	2.90871	1	0.677539	0.660188
GOTERM_BP_DIRECT	GO:0006123~mitochondrial electron transport, cytochrome c to oxygen	4	0.484848	0.0578282	COX8A, NDUFA4, COX4I1, COX5B	753	20	16792	4.46003	1	0.697038	0.679187
GOTERM_BP_DIRECT	GO:0001892~embryonic placenta development	4	0.484848	0.0578282	CEBPB, CITED2, HIF1A, PKD1	753	20	16792	4.46003	1	0.697038	0.679187
GOTERM_BP_DIRECT	GO:0071385~cellular response to glucocorticoid stimulus	4	0.484848	0.0578282	ADCYAP1, ZFP36, ANXA1, ZFP36L1	753	20	16792	4.46003	1	0.697038	0.679187
GOTERM_BP_DIRECT	GO:0045600~positive regulation of fat cell differentiation	6	0.727273	0.0580061	ZFP36, SFRP1, CEBPB, LMO3, ZNF385A, ZFP36L1	753	47	16792	2.84683	1	0.697038	0.679187
GOTERM_BP_DIRECT	GO:0045860~positive regulation of protein kinase activity	6	0.727273	0.0580061	ADCYAP1, RASSF2, CCL21, MMD2, PPP1R9A, GAS6	753	47	16792	2.84683	1	0.697038	0.679187
GOTERM_BP_DIRECT	GO:0071230~cellular response to amino acid stimulus	6	0.727273	0.0580061	GLRA1, CEBPB, ZEB1, NEURL1, COL4A6, CPEB3	753	47	16792	2.84683	1	0.697038	0.679187
GOTERM_BP_DIRECT	GO:0016525~negative regulation of angiogenesis	7	0.848485	0.0583796	SPARC, ROCK2, SERPINF1, ADGRB1, PTN, SULF1, DCN	753	62	16792	2.51776	1	0.697038	0.679187
GOTERM_BP_DIRECT	GO:0010634~positive regulation of epithelial cell migration	5	0.606061	0.0584008	JUN, GLIPR2, PRKCE, TAC1, HIF1A	753	33	16792	3.37881	1	0.697038	0.679187
GOTERM_BP_DIRECT	GO:0097105~presynaptic membrane assembly	3	0.363636	0.0584987	NLGN1, NLGN4X, LRP4	753	9	16792	7.43338	1	0.697038	0.679187
GOTERM_BP_DIRECT	GO:0021675~nerve development	3	0.363636	0.0584987	NRP1, NRP2, SEMA3A	753	9	16792	7.43338	1	0.697038	0.679187
GOTERM_BP_DIRECT	GO:1990573~potassium ion import across plasma membrane	3	0.363636	0.0584987	KCNJ8, ATP1B1, KCNJ3	753	9	16792	7.43338	1	0.697038	0.679187
GOTERM_BP_DIRECT	GO:0061549~sympathetic ganglion development	3	0.363636	0.0584987	NRP1, NRP2, SEMA3A	753	9	16792	7.43338	1	0.697038	0.679187
GOTERM_BP_DIRECT	GO:0015816~glycine transport	3	0.363636	0.0584987	SLC32A1, SLC6A9, SLC6A20	753	9	16792	7.43338	1	0.697038	0.679187
GOTERM_BP_DIRECT	GO:0043583~ear development	3	0.363636	0.0584987	DDR1, ECE1, GATA3	753	9	16792	7.43338	1	0.697038	0.679187
GOTERM_BP_DIRECT	GO:0032330~regulation of chondrocyte differentiation	3	0.363636	0.0584987	SHOX2, GLG1, CTGF	753	9	16792	7.43338	1	0.697038	0.679187
GOTERM_BP_DIRECT	GO:0034765~regulation of ion transmembrane transport	10	1.21212	0.0611483	KCNJ10, KCNJ8, KCNE4, KCNJ13, KCNMA1, CACNA1B, KCNQ5, NALCN, CACNA1E, KCNJ3	753	111	16792	2.00902	1	0.72594	0.70735
GOTERM_BP_DIRECT	GO:0090090~negative regulation of canonical Wnt signaling pathway	13	1.57576	0.0626515	EGR1, TCF7L2, CAV1, IGFBP2, LRP4, PRICKLE1, AXIN2, MCC, SFRP1, LATS2, SOST, APOE, CTHRC1	753	163	16792	1.77854	1	0.741071	0.722093
GOTERM_BP_DIRECT	GO:0006096~glycolytic process	5	0.606061	0.0639427	GPI, LDHA, PGK1, ENO1, ALDOA	753	34	16792	3.27943	1	0.750499	0.73128
GOTERM_BP_DIRECT	GO:0007585~respiratory gaseous exchange	5	0.606061	0.0639427	EDNRA, CHST11, UCP3, COX5B, GRIN1	753	34	16792	3.27943	1	0.750499	0.73128
GOTERM_BP_DIRECT	GO:0032496~response to lipopolysaccharide	13	1.57576	0.0649892	JUN, VCAM1, SPARC, MAOB, KCNJ8, EPO, COMT, DCN, THBD, PENK, LTA, TAC1, TIMP4	753	164	16792	1.76769	1	0.750499	0.73128
GOTERM_BP_DIRECT	GO:0048844~artery morphogenesis	4	0.484848	0.0653011	NRP1, HES1, APOE, VEGFA	753	21	16792	4.24764	1	0.750499	0.73128
GOTERM_BP_DIRECT	GO:0035249~synaptic transmission, glutamatergic	4	0.484848	0.0653011	GRIK2, CNIH2, CNIH3, GRIN1	753	21	16792	4.24764	1	0.750499	0.73128
GOTERM_BP_DIRECT	GO:0051894~positive regulation of focal adhesion assembly	4	0.484848	0.0653011	SFRP1, KDR, S100A10, VEGFA	753	21	16792	4.24764	1	0.750499	0.73128
GOTERM_BP_DIRECT	GO:0035902~response to immobilization stress	4	0.484848	0.0653011	GPI, GAL, CRH, SLC8A1	753	21	16792	4.24764	1	0.750499	0.73128
GOTERM_BP_DIRECT	GO:0002028~regulation of sodium ion transport	4	0.484848	0.0653011	LOC102724428, NKAIN3, NOS1, SLC8A1	753	21	16792	4.24764	1	0.750499	0.73128
GOTERM_BP_DIRECT	GO:0046718~viral entry into host cell	8	0.969697	0.0668615	ITGB1, EFNB2, CXADR, TFRC, NCAM1, GAS6, PVR, NECTIN1	753	80	16792	2.23001	1	0.765718	0.746108
GOTERM_BP_DIRECT	GO:0086091~regulation of heart rate by cardiac conduction	5	0.606061	0.0697496	CACNB2, CAV1, AKAP9, SCN4B, KCNJ3	753	35	16792	3.18573	1	0.788103	0.76792
GOTERM_BP_DIRECT	GO:0051272~positive regulation of cellular component movement	3	0.363636	0.0710047	BCL6, PDPN, VEGFA	753	10	16792	6.69004	1	0.788103	0.76792
GOTERM_BP_DIRECT	GO:2000406~positive regulation of T cell migration	3	0.363636	0.0710047	CXCL12, ITGA4, CCL21	753	10	16792	6.69004	1	0.788103	0.76792
GOTERM_BP_DIRECT	GO:0022407~regulation of cell-cell adhesion	3	0.363636	0.0710047	PODXL, MINK1, EFNA5	753	10	16792	6.69004	1	0.788103	0.76792
GOTERM_BP_DIRECT	GO:0072015~glomerular visceral epithelial cell development	3	0.363636	0.0710047	JAG1, PODXL, AMPD2	753	10	16792	6.69004	1	0.788103	0.76792
GOTERM_BP_DIRECT	GO:0015718~monocarboxylic acid transport	3	0.363636	0.0710047	SLC16A1, SLC16A6, SLC16A3	753	10	16792	6.69004	1	0.788103	0.76792
GOTERM_BP_DIRECT	GO:0032060~bleb assembly	3	0.363636	0.0710047	PMP22, EMP3, MYLK	753	10	16792	6.69004	1	0.788103	0.76792
GOTERM_BP_DIRECT	GO:0045616~regulation of keratinocyte differentiation	3	0.363636	0.0710047	ZFP36, ROCK2, ZFP36L1	753	10	16792	6.69004	1	0.788103	0.76792
GOTERM_BP_DIRECT	GO:0051901~positive regulation of mitochondrial depolarization	3	0.363636	0.0710047	KDR, CCK, DCN	753	10	16792	6.69004	1	0.788103	0.76792
GOTERM_BP_DIRECT	GO:0045766~positive regulation of angiogenesis	10	1.21212	0.0730001	SEMA5A, PRKCB, SERPINE1, KDR, HSPB1, PRKD1, ANGPTL4, HIF1A, AQP1, VEGFA	753	115	16792	1.93914	1	0.804117	0.783524
GOTERM_BP_DIRECT	GO:0031334~positive regulation of protein complex assembly	4	0.484848	0.0731917	TAL1, CDC42EP2, MPP7, VEGFA	753	22	16792	4.05457	1	0.804117	0.783524
GOTERM_BP_DIRECT	GO:0071542~dopaminergic neuron differentiation	4	0.484848	0.0731917	DMRTA2, SFRP1, HIF1A, VEGFA	753	22	16792	4.05457	1	0.804117	0.783524
GOTERM_BP_DIRECT	GO:0002244~hematopoietic progenitor cell differentiation	7	0.848485	0.0745261	SLC8A3, SFRP1, PTPRZ1, CEBPD, CITED2, KCNAB2, EML1	753	66	16792	2.36517	1	0.81601	0.795113
GOTERM_BP_DIRECT	GO:0042542~response to hydrogen peroxide	6	0.727273	0.0770104	LDHA, JUN, TRPA1, DUSP1, TXNIP, SLC8A1	753	51	16792	2.62355	1	0.837553	0.816104
GOTERM_BP_DIRECT	GO:0007519~skeletal muscle tissue development	6	0.727273	0.0770104	SRPK3, MEF2C, CAV1, NEURL1, NR2F2, DCN	753	51	16792	2.62355	1	0.837553	0.816104
GOTERM_BP_DIRECT	GO:0007204~positive regulation of cytosolic calcium ion concentration	11	1.33333	0.0784403	ADCYAP1, EDNRA, TRPC5, CCKAR, DLG4, SWAP70, SAA1, CCR9, CXCR4, TAC1, PKD1	753	134	16792	1.83061	1	0.850251	0.828476
GOTERM_BP_DIRECT	GO:0032868~response to insulin	7	0.848485	0.0789222	EGR1, HSD11B2, GAL, AANAT, VGF, UCP3, IGFBP2	753	67	16792	2.32986	1	0.852622	0.830787
GOTERM_BP_DIRECT	GO:0033137~negative regulation of peptidyl-serine phosphorylation	4	0.484848	0.0814838	RASSF2, CAV1, DDIT4, INPP5J	753	23	16792	3.87828	1	0.865223	0.843065
GOTERM_BP_DIRECT	GO:0060173~limb development	4	0.484848	0.0814838	SALL1, LRP4, NR2F2, PAM	753	23	16792	3.87828	1	0.865223	0.843065
GOTERM_BP_DIRECT	GO:0019233~sensory perception of pain	6	0.727273	0.0822269	ADCYAP1, GRIN2A, TRPA1, PENK, TAC1, GRIN1	753	52	16792	2.57309	1	0.865223	0.843065
GOTERM_BP_DIRECT	GO:0034097~response to cytokine	6	0.727273	0.0822269	JUN, SPARC, AANAT, TIMP2, TIMP4, MCL1	753	52	16792	2.57309	1	0.865223	0.843065
GOTERM_BP_DIRECT	GO:0009749~response to glucose	7	0.848485	0.0834608	TCF7L2, EGR1, LDHA, TXNIP, TRH, SLC8A1, CTGF	753	68	16792	2.2956	1	0.865223	0.843065
GOTERM_BP_DIRECT	GO:0035879~plasma membrane lactate transport	3	0.363636	0.0842792	SLC16A1, SLC16A6, SLC16A3	753	11	16792	6.08185	1	0.865223	0.843065
GOTERM_BP_DIRECT	GO:0050927~positive regulation of positive chemotaxis	3	0.363636	0.0842792	KDR, CDH13, VEGFA	753	11	16792	6.08185	1	0.865223	0.843065
GOTERM_BP_DIRECT	GO:0007206~phospholipase C-activating G-protein coupled glutamate receptor signaling pathway	2	0.242424	0.0875635	GRM5, HOMER1	753	2	16792	22.3001	1	0.865223	0.843065
GOTERM_BP_DIRECT	GO:0060401~cytosolic calcium ion transport	2	0.242424	0.0875635	SLC8A1, CTGF	753	2	16792	22.3001	1	0.865223	0.843065
GOTERM_BP_DIRECT	GO:1902998~positive regulation of neurofibrillary tangle assembly	2	0.242424	0.0875635	APOE, CLU	753	2	16792	22.3001	1	0.865223	0.843065
GOTERM_BP_DIRECT	GO:1904582~positive regulation of intracellular mRNA localization	2	0.242424	0.0875635	ZFP36, ZFP36L1	753	2	16792	22.3001	1	0.865223	0.843065
GOTERM_BP_DIRECT	GO:1902336~positive regulation of retinal ganglion cell axon guidance	2	0.242424	0.0875635	NRP1, VEGFA	753	2	16792	22.3001	1	0.865223	0.843065
GOTERM_BP_DIRECT	GO:0031086~nuclear-transcribed mRNA catabolic process, deadenylation-independent decay	2	0.242424	0.0875635	ZFP36, ZFP36L1	753	2	16792	22.3001	1	0.865223	0.843065
GOTERM_BP_DIRECT	GO:0032370~positive regulation of lipid transport	2	0.242424	0.0875635	LRP1, LRAT	753	2	16792	22.3001	1	0.865223	0.843065
GOTERM_BP_DIRECT	GO:1900221~regulation of beta-amyloid clearance	2	0.242424	0.0875635	APOE, CLU	753	2	16792	22.3001	1	0.865223	0.843065
GOTERM_BP_DIRECT	GO:1904835~dorsal root ganglion morphogenesis	2	0.242424	0.0875635	NRP1, NRP2	753	2	16792	22.3001	1	0.865223	0.843065
GOTERM_BP_DIRECT	GO:0014846~esophagus smooth muscle contraction	2	0.242424	0.0875635	SULF1, SULF2	753	2	16792	22.3001	1	0.865223	0.843065
GOTERM_BP_DIRECT	GO:2000854~positive regulation of corticosterone secretion	2	0.242424	0.0875635	CRH, TAC1	753	2	16792	22.3001	1	0.865223	0.843065
GOTERM_BP_DIRECT	GO:0006540~glutamate decarboxylation to succinate	2	0.242424	0.0875635	GAD1, GAD2	753	2	16792	22.3001	1	0.865223	0.843065
GOTERM_BP_DIRECT	GO:1901631~positive regulation of presynaptic membrane organization	2	0.242424	0.0875635	LRP4, APOE	753	2	16792	22.3001	1	0.865223	0.843065
GOTERM_BP_DIRECT	GO:1904395~positive regulation of skeletal muscle acetylcholine-gated channel clustering	2	0.242424	0.0875635	LRP4, PTN	753	2	16792	22.3001	1	0.865223	0.843065
GOTERM_BP_DIRECT	GO:2000054~negative regulation of Wnt signaling pathway involved in dorsal/ventral axis specification	2	0.242424	0.0875635	SFRP1, SOST	753	2	16792	22.3001	1	0.865223	0.843065
GOTERM_BP_DIRECT	GO:0036303~lymph vessel morphogenesis	2	0.242424	0.0875635	PKD1, VEGFA	753	2	16792	22.3001	1	0.865223	0.843065
GOTERM_BP_DIRECT	GO:0038190~VEGF-activated neuropilin signaling pathway	2	0.242424	0.0875635	NRP1, VEGFA	753	2	16792	22.3001	1	0.865223	0.843065
GOTERM_BP_DIRECT	GO:0090259~regulation of retinal ganglion cell axon guidance	2	0.242424	0.0875635	NRP1, VEGFA	753	2	16792	22.3001	1	0.865223	0.843065
GOTERM_BP_DIRECT	GO:0044702~single organism reproductive process	2	0.242424	0.0875635	NPPC, NPR2	753	2	16792	22.3001	1	0.865223	0.843065
GOTERM_BP_DIRECT	GO:1902172~regulation of keratinocyte apoptotic process	2	0.242424	0.0875635	ZFP36, ZFP36L1	753	2	16792	22.3001	1	0.865223	0.843065
GOTERM_BP_DIRECT	GO:0021649~vestibulocochlear nerve structural organization	2	0.242424	0.0875635	NRP1, NRP2	753	2	16792	22.3001	1	0.865223	0.843065
GOTERM_BP_DIRECT	GO:0007422~peripheral nervous system development	4	0.484848	0.0901599	CITED2, ADGRB1, PMP22, SERPINI1	753	24	16792	3.71669	1	0.882805	0.860197
GOTERM_BP_DIRECT	GO:0048870~cell motility	4	0.484848	0.0901599	MMP14, PDPN, FSCN1, PLD2	753	24	16792	3.71669	1	0.882805	0.860197
GOTERM_BP_DIRECT	GO:0090102~cochlea development	4	0.484848	0.0901599	GABRA5, HES1, GATA3, SOBP	753	24	16792	3.71669	1	0.882805	0.860197
GOTERM_BP_DIRECT	GO:0007265~Ras protein signal transduction	7	0.848485	0.0929621	JUN, KSR1, SHC1, PLK2, PRKD1, RASGRP2, NTN1	753	70	16792	2.23001	1	0.907501	0.88426
GOTERM_BP_DIRECT	GO:0010951~negative regulation of endopeptidase activity	10	1.21212	0.093266	LXN, SERPINE2, SERPINF1, SERPINE1, ANOS1, TIMP2, SPOCK1, SERPINI1, TFPI, TIMP4	753	121	16792	1.84299	1	0.907733	0.884486
GOTERM_BP_DIRECT	GO:0008277~regulation of G-protein coupled receptor protein signaling pathway	5	0.606061	0.0955354	ADCYAP1, RGS5, RGS3, RGS12, RAMP1	753	39	16792	2.85899	1	0.91746	0.893964
GOTERM_BP_DIRECT	GO:0032570~response to progesterone	5	0.606061	0.0955354	GPI, GABRB1, CAV1, TXNIP, PTN	753	39	16792	2.85899	1	0.91746	0.893964
GOTERM_BP_DIRECT	GO:0061158~3'-UTR-mediated mRNA destabilization	3	0.363636	0.0982285	ZFP36, CPEB3, ZFP36L1	753	12	16792	5.57503	1	0.91746	0.893964
GOTERM_BP_DIRECT	GO:0032230~positive regulation of synaptic transmission, GABAergic	3	0.363636	0.0982285	NLGN1, PRKCE, TAC1	753	12	16792	5.57503	1	0.91746	0.893964
GOTERM_BP_DIRECT	GO:0097320~membrane tubulation	3	0.363636	0.0982285	EHD2, MICALL1, PACSIN1	753	12	16792	5.57503	1	0.91746	0.893964
GOTERM_BP_DIRECT	GO:0009268~response to pH	3	0.363636	0.0982285	KCNJ8, PAM, ASIC1	753	12	16792	5.57503	1	0.91746	0.893964
GOTERM_BP_DIRECT	GO:0030007~cellular potassium ion homeostasis	3	0.363636	0.0982285	KCNMA1, ATP1B3, ATP1B1	753	12	16792	5.57503	1	0.91746	0.893964
GOTERM_BP_DIRECT	GO:0042136~neurotransmitter biosynthetic process	3	0.363636	0.0982285	GAD1, GAD2, NOS1	753	12	16792	5.57503	1	0.91746	0.893964
GOTERM_BP_DIRECT	GO:0048024~regulation of mRNA splicing, via spliceosome	3	0.363636	0.0982285	KHDRBS1, JMJD6, SRPK1	753	12	16792	5.57503	1	0.91746	0.893964
GOTERM_BP_DIRECT	GO:0021670~lateral ventricle development	3	0.363636	0.0982285	DNAH5, TSKU, AQP1	753	12	16792	5.57503	1	0.91746	0.893964
GOTERM_BP_DIRECT	GO:0010447~response to acidic pH	3	0.363636	0.0982285	SST, SERPINF1, ASIC1	753	12	16792	5.57503	1	0.91746	0.893964
GOTERM_BP_DIRECT	GO:0045670~regulation of osteoclast differentiation	3	0.363636	0.0982285	CEBPB, RASSF2, CAMK4	753	12	16792	5.57503	1	0.91746	0.893964
GOTERM_BP_DIRECT	GO:0009950~dorsal/ventral axis specification	3	0.363636	0.0982285	SFRP1, AXIN2, WNT3	753	12	16792	5.57503	1	0.91746	0.893964
GOTERM_BP_DIRECT	GO:0055119~relaxation of cardiac muscle	3	0.363636	0.0982285	ATP2A2, ATP1B1, SLC8A1	753	12	16792	5.57503	1	0.91746	0.893964
GOTERM_BP_DIRECT	GO:0000188~inactivation of MAPK activity	4	0.484848	0.099202	RGS3, DUSP1, CAV1, DUSP6	753	25	16792	3.56802	1	0.918611	0.895086
GOTERM_BP_DIRECT	GO:0002040~sprouting angiogenesis	4	0.484848	0.099202	NRP1, RNF213, CDH13, JMJD6	753	25	16792	3.56802	1	0.918611	0.895086
GOTERM_BP_DIRECT	GO:0007159~leukocyte cell-cell adhesion	4	0.484848	0.099202	ITGB1, VCAM1, ITGA4, EZR	753	25	16792	3.56802	1	0.918611	0.895086

## Sheet: Gill up GO BP
Category	GO ID and Term Description	Count	%	p-value	Genes	List Total	Pop Hits	Pop Total	Fold Enrichment	Bonferroni	Benjamini	FDR
GOTERM_BP_DIRECT	GO:0061621~canonical glycolysis	10	3.15457	3.71155e-10	PFKFB4, PFKL, PKM, TPI1, PGK1, ALDOC, ALDOB, ENO1, ALDOA, PFKP	299	26	16792	21.6002	7.13731e-07	7.13731e-07	7.09277e-07
GOTERM_BP_DIRECT	GO:0006094~gluconeogenesis	10	3.15457	6.36235e-08	PER2, TPI1, PGK1, ALDOC, SLC25A10, ALDOB, ENO1, ALDOA, PGM1, PCK2	299	44	16792	12.7638	0.000122341	4.83431e-05	4.80415e-05
GOTERM_BP_DIRECT	GO:0055114~oxidation-reduction process	32	10.0946	7.54183e-08	ERO1A, NCF1, NCF2, GLDC, CPOX, PLOD1, HIGD1A, ADO, LOXL2, CYP26B1, LDHA, AIFM1, FTH1, CYP1B1, HIF1AN, EGLN1, HSD3B7, EGLN3, EGLN2, VCAM1, P3H2, DIO3, PXDNL, P3H3, JMJD6, SELENON, P4HA1, BDH1, LOX, CYP1A1, CDO1, KDM7A	299	592	16792	3.0357	0.000145019	4.83431e-05	4.80415e-05
GOTERM_BP_DIRECT	GO:0006096~glycolytic process	9	2.83912	1.08908e-07	LDHA, PFKL, TPI1, PGK1, ALDOC, ALDOB, ENO1, ALDOA, PGM1	299	34	16792	14.866	0.000209408	5.23575e-05	5.20307e-05
GOTERM_BP_DIRECT	GO:0001666~response to hypoxia	16	5.04732	4.37168e-07	EGLN1, EGLN3, EGLN2, VCAM1, TGFB3, PLOD1, HIF1A, LOXL2, VEGFA, LDHA, PKM, CXCL12, MB, KCNMA1, DDIT4, CYP1A1	299	172	16792	5.22424	0.000840321	0.000168135	0.000167086
GOTERM_BP_DIRECT	GO:0006198~cAMP catabolic process	6	1.89274	4.41786e-06	PDE10A, PDE4D, PDE3B, PDE4B, PDE7A, PDE8A	299	15	16792	22.4642	0.00845957	0.00141592	0.00140709
GOTERM_BP_DIRECT	GO:0018401~peptidyl-proline hydroxylation to 4-hydroxy-L-proline	4	1.26183	5.38911e-05	EGLN1, EGLN3, EGLN2, P4HA1	299	5	16792	44.9284	0.098446	0.0148047	0.0147123
GOTERM_BP_DIRECT	GO:0061418~regulation of transcription from RNA polymerase II promoter in response to hypoxia	6	1.89274	0.000119649	EGLN1, EGLN3, EGLN2, HIF1AN, HIF1A, VEGFA	299	28	16792	12.0344	0.205545	0.0287606	0.0285811
GOTERM_BP_DIRECT	GO:0006006~glucose metabolic process	8	2.52366	0.000180707	SERP1, IGFBP5, MYC, IGF2, CREM, PDK3, IRS2, PGM1	299	67	16792	6.70574	0.293569	0.0353237	0.0351033
GOTERM_BP_DIRECT	GO:0030388~fructose 1,6-bisphosphate metabolic process	4	1.26183	0.000183691	PFKL, ALDOC, ALDOB, ALDOA	299	7	16792	32.0917	0.297612	0.0353237	0.0351033
GOTERM_BP_DIRECT	GO:0008285~negative regulation of cell proliferation	19	5.99369	0.000266057	HDAC4, BTG1, TGFB3, ZBTB16, P3H2, P3H3, BMP7, TOB1, MNT, RGCC, FRZB, HGS, FTH1, NCK2, CD9, CYP1B1, NUPR2, IGFBP6, JARID2	299	396	16792	2.69457	0.400521	0.0465115	0.0462213
GOTERM_BP_DIRECT	GO:0006000~fructose metabolic process	4	1.26183	0.000605327	PFKFB4, ALDOC, ALDOB, ALDOA	299	10	16792	22.4642	0.687889	0.0970037	0.0963983
GOTERM_BP_DIRECT	GO:0050679~positive regulation of epithelial cell proliferation	7	2.2082	0.000665165	DLX5, MYC, SOX9, GLUL, EGFR, FGFR2, VEGFA	299	60	16792	6.55206	0.721834	0.0983932	0.0977792
GOTERM_BP_DIRECT	GO:0001501~skeletal system development	10	3.15457	0.000763434	HDAC4, SERP1, ANKH, DLX5, FRZB, ZBTB16, IGF2, SOX9, BMP7, PHEX	299	137	16792	4.09931	0.769763	0.104863	0.104209
GOTERM_BP_DIRECT	GO:0002053~positive regulation of mesenchymal cell proliferation	5	1.57729	0.00106773	MYC, IRS2, SOX9, FGFR2, VEGFA	299	26	16792	10.8001	0.871822	0.136883	0.136028
GOTERM_BP_DIRECT	GO:0007155~cell adhesion	19	5.99369	0.00147945	BMP10, SPON1, SELPLG, VCAM1, TNFAIP6, OLFM4, LYVE1, LOXL2, CTGF, BCAM, CXCL12, COL4A6, CD9, CYP1B1, NCAM1, DSCAML1, NECTIN3, CD22, NECTIN1	299	459	16792	2.32473	0.941987	0.17001	0.168949
GOTERM_BP_DIRECT	GO:0030855~epithelial cell differentiation	7	2.2082	0.00150295	DLX5, PGK1, ALDOC, PPARG, BMP7, FGFR2, VEGFA	299	70	16792	5.61605	0.944554	0.17001	0.168949
GOTERM_BP_DIRECT	GO:0015671~oxygen transport	4	1.26183	0.002149	HBZ, MB, MYC, HBE1	299	15	16792	14.9761	0.984029	0.229585	0.228152
GOTERM_BP_DIRECT	GO:0060548~negative regulation of cell death	6	1.89274	0.00286768	BNIP3L, MYC, TTPA, PDE8A, BMP7, CTGF	299	55	16792	6.1266	0.996004	0.272265	0.270566
GOTERM_BP_DIRECT	GO:0001837~epithelial to mesenchymal transition	5	1.57729	0.00296351	SOX9, HIF1A, BMP7, FGFR2, LOXL2	299	34	16792	8.2589	0.996678	0.272265	0.270566
GOTERM_BP_DIRECT	GO:0001558~regulation of cell growth	7	2.2082	0.00297325	EGLN2, IGFBP5, HTRA3, AGTR1, WFDC1, IGFBP6, CTGF	299	80	16792	4.91405	0.99674	0.272265	0.270566
GOTERM_BP_DIRECT	GO:0045892~negative regulation of transcription, DNA-templated	19	5.99369	0.00363335	HDAC4, CEBPB, CIPC, ZBTB16, BHLHE41, CREM, ARID5A, ZBTB21, ENO1, BMP7, LOXL2, DKK3, GLIS2, PER2, MDM2, PPARG, BCOR, SOX9, JARID2	299	499	16792	2.13838	0.999088	0.309797	0.307864
GOTERM_BP_DIRECT	GO:0006970~response to osmotic stress	4	1.26183	0.00370532	KCNMA1, TSC22D2, SLC2A1, EGFR	299	18	16792	12.4801	0.999206	0.309797	0.307864
GOTERM_BP_DIRECT	GO:0001892~embryonic placenta development	4	1.26183	0.00504282	CEBPB, TTPA, HIF1A, EGFR	299	20	16792	11.2321	0.99994	0.389274	0.386845
GOTERM_BP_DIRECT	GO:0007165~signal transduction	34	10.7256	0.00506077	CNTFR, GRN, TNFAIP6, PDE3B, FAM13A, CREM, IRS2, HIF1A, IPO7, EGFR, CORO1C, ARHGAP40, PDE4B, NCK2, MAPK1, SOX9, IGFBP6, PDE8A, MPP1, IGFBP5, PDE4D, PLAUR, RASSF8, ARHGAP28, CDC42BPB, LYVE1, ARHGAP24, BCAM, PDE10A, CXCL12, HGS, PPARG, PDE7A, NECTIN1	299	1161	16792	1.64467	0.999942	0.389274	0.386845
GOTERM_BP_DIRECT	GO:0030879~mammary gland development	4	1.26183	0.0058069	BCL2L11, TGFB3, IRS2, SOX9	299	21	16792	10.6972	0.999986	0.429487	0.426807
GOTERM_BP_DIRECT	GO:0006090~pyruvate metabolic process	4	1.26183	0.00663655	LDHA, BSG, SLC16A3, PCK2	299	22	16792	10.211	0.999997	0.440628	0.437878
GOTERM_BP_DIRECT	GO:0009749~response to glucose	6	1.89274	0.00713406	LDHA, PFKL, TXNIP, IRS2, GLUL, CTGF	299	68	16792	4.95534	0.999999	0.440628	0.437878
GOTERM_BP_DIRECT	GO:0071456~cellular response to hypoxia	7	2.2082	0.00725636	ERO1A, BNIP3L, RGCC, MDM2, HIF1A, BMP7, VEGFA	299	96	16792	4.09504	0.999999	0.440628	0.437878
GOTERM_BP_DIRECT	GO:0010628~positive regulation of gene expression	12	3.78549	0.00726854	CYP26B1, RGCC, NFIL3, HGS, MYC, MDM2, STAP1, FBLN1, VIM, HIF1A, CTGF, VEGFA	299	262	16792	2.57224	0.999999	0.440628	0.437878
GOTERM_BP_DIRECT	GO:0043434~response to peptide hormone	5	1.57729	0.00755452	CXCL12, BTG1, BSG, BMP7, CTGF	299	44	16792	6.38188	1	0.440628	0.437878
GOTERM_BP_DIRECT	GO:0006879~cellular iron ion homeostasis	5	1.57729	0.00755452	EGLN1, MYC, FTH1, ACO1, HIF1A	299	44	16792	6.38188	1	0.440628	0.437878
GOTERM_BP_DIRECT	GO:0001934~positive regulation of protein phosphorylation	8	2.52366	0.00756148	IL34, PLAUR, IGF2, SOX9, FNIP1, PDE8A, EGFR, VEGFA	299	127	16792	3.53767	1	0.440628	0.437878
GOTERM_BP_DIRECT	GO:0032963~collagen metabolic process	3	0.946372	0.00818949	P3H2, P3H3, HIF1A	299	8	16792	21.0602	1	0.449954	0.447146
GOTERM_BP_DIRECT	GO:0060100~positive regulation of phagocytosis, engulfment	3	0.946372	0.00818949	STAP1, F2RL1, PPARG	299	8	16792	21.0602	1	0.449954	0.447146
GOTERM_BP_DIRECT	GO:0007568~aging	9	2.83912	0.00935331	CASP7, VCAM1, IGFBP5, LRP1, TGFB3, PDE4D, CYP1A1, LOXL2, CTGF	299	165	16792	3.0633	1	0.496239	0.493143
GOTERM_BP_DIRECT	GO:0000122~negative regulation of transcription from RNA polymerase II promoter	23	7.25552	0.00954803	HDAC4, HBZ, ZBTB16, USP2, BHLHE41, BARX2, GLIS2, VEGFA, PER2, EFNA1, MNT, PER3, NFIL3, MYC, MDM2, TXNIP, NUPR2, PPARG, BCOR, JARID2, FNIP1, FNIP2, FGFR2	299	720	16792	1.79402	1	0.496239	0.493143
GOTERM_BP_DIRECT	GO:0007584~response to nutrient	6	1.89274	0.0101212	LDHA, PKM, VCAM1, TTPA, COX4I1, PPARG	299	74	16792	4.55356	1	0.512184	0.508987
GOTERM_BP_DIRECT	GO:0005978~glycogen biosynthetic process	4	1.26183	0.0106356	PER2, GYS1, GYG1, PGM1	299	26	16792	8.64008	1	0.513966	0.510759
GOTERM_BP_DIRECT	GO:0007623~circadian rhythm	6	1.89274	0.0106909	PER2, HEBP1, NFIL3, KLF9, AGRP, EGFR	299	75	16792	4.49284	1	0.513966	0.510759
GOTERM_BP_DIRECT	GO:0006464~cellular protein modification process	7	2.2082	0.011048	ERO1A, SERP1, GGCX, LOX, PLOD1, PHEX, LOXL2	299	105	16792	3.74404	1	0.516566	0.513343
GOTERM_BP_DIRECT	GO:0030324~lung development	6	1.89274	0.0112823	LOX, EGFR, FGFR2, CTGF, JMJD6, VEGFA	299	76	16792	4.43373	1	0.516566	0.513343
GOTERM_BP_DIRECT	GO:0010800~positive regulation of peptidyl-threonine phosphorylation	4	1.26183	0.0118106	CEMIP, WNK3, MAPK1, BMP7	299	27	16792	8.32008	1	0.528181	0.524885
GOTERM_BP_DIRECT	GO:0015718~monocarboxylic acid transport	3	0.946372	0.012857	BSG, SLC16A3, SLC16A5	299	10	16792	16.8482	1	0.56191	0.558403
GOTERM_BP_DIRECT	GO:0019511~peptidyl-proline hydroxylation	3	0.946372	0.0155316	P3H2, P3H3, HIF1AN	299	11	16792	15.3165	1	0.65916	0.655047
GOTERM_BP_DIRECT	GO:0034504~protein localization to nucleus	4	1.26183	0.0157677	ZBTB16, MDM2, SOX9, BMP7	299	30	16792	7.48807	1	0.65916	0.655047
GOTERM_BP_DIRECT	GO:0030335~positive regulation of cell migration	9	2.83912	0.0170556	CEMIP, TNFAIP6, MYOC, HSPA5, F2RL1, MAPK1, IRS2, EGFR, VEGFA	299	184	16792	2.74698	1	0.69591	0.691568
GOTERM_BP_DIRECT	GO:0001525~angiogenesis	10	3.15457	0.0183072	EFNA1, PDE3B, CYP1B1, SCG2, HIF1A, RAMP1, ARHGAP24, FGFR2, CTGF, VEGFA	299	223	16792	2.51841	1	0.69591	0.691568
GOTERM_BP_DIRECT	GO:0032922~circadian regulation of gene expression	5	1.57729	0.0183901	PER2, PER3, USP2, BHLHE41, CREM	299	57	16792	4.92636	1	0.69591	0.691568
GOTERM_BP_DIRECT	GO:0030728~ovulation	3	0.946372	0.0184217	TNFAIP6, MYC, KMT2B	299	12	16792	14.0401	1	0.69591	0.691568
GOTERM_BP_DIRECT	GO:0001822~kidney development	6	1.89274	0.0184563	BCL2L11, TIPARP, ODC1, AGTR1, JMJD6, VEGFA	299	86	16792	3.91818	1	0.69591	0.691568
GOTERM_BP_DIRECT	GO:0071364~cellular response to epidermal growth factor stimulus	4	1.26183	0.0203828	MYC, SOX9, PDE8A, EGFR	299	33	16792	6.80734	1	0.748081	0.743412
GOTERM_BP_DIRECT	GO:0071407~cellular response to organic cyclic compound	5	1.57729	0.0206179	CEBPB, IGFBP5, TIPARP, CYP1A1, CYP1B1	299	59	16792	4.75937	1	0.748081	0.743412
GOTERM_BP_DIRECT	GO:0048286~lung alveolus development	4	1.26183	0.0220685	SELENON, IGFBP5, TGFB3, FGFR2	299	34	16792	6.60712	1	0.785884	0.78098
GOTERM_BP_DIRECT	GO:0007411~axon guidance	8	2.52366	0.023517	EFNA1, CXCL12, DLX5, MAPK1, NCAM1, BMP7, SPTBN2, NECTIN1	299	159	16792	2.82569	1	0.818239	0.813133
GOTERM_BP_DIRECT	GO:0006865~amino acid transport	4	1.26183	0.0238281	SLC36A2, SLC43A2, MYC, SLC38A3	299	35	16792	6.41835	1	0.818239	0.813133
GOTERM_BP_DIRECT	GO:0043547~positive regulation of GTPase activity	18	5.67823	0.0243914	PLEKHG3, PLEKHG1, FAM13A, ARHGAP29, ARHGAP28, DENND3, IRS2, EGFR, ARHGAP24, RIC8B, ARHGAP40, RASGEF1B, NCK2, RGS21, NCAM1, FNIP1, FGFR2, SPTBN2	299	565	16792	1.78919	1	0.822751	0.817616
GOTERM_BP_DIRECT	GO:0042176~regulation of protein catabolic process	3	0.946372	0.0248151	HGS, ODC1, MDM2	299	14	16792	12.0344	1	0.822751	0.817616
GOTERM_BP_DIRECT	GO:0050930~induction of positive chemotaxis	3	0.946372	0.0283022	CXCL12, SCG2, VEGFA	299	15	16792	11.2321	1	0.907087	0.901427
GOTERM_BP_DIRECT	GO:0030502~negative regulation of bone mineralization	3	0.946372	0.0283022	BCOR, SOX9, HIF1A	299	15	16792	11.2321	1	0.907087	0.901427
GOTERM_BP_DIRECT	GO:0030199~collagen fibril organization	4	1.26183	0.0316026	P4HA1, LOX, CYP1B1, LOXL2	299	39	16792	5.76005	1	0.991663	0.985475
GOTERM_BP_DIRECT	GO:0061036~positive regulation of cartilage development	3	0.946372	0.0319725	BMP10, ZBTB16, SOX9	299	16	16792	10.5301	1	0.991663	0.985475
GOTERM_BP_DIRECT	GO:0016337~single organismal cell-cell adhesion	6	1.89274	0.0339808	DSP, VCAM1, SOX9, NECTIN3, EGFR, NECTIN1	299	101	16792	3.33627	1	1	0.994277
GOTERM_BP_DIRECT	GO:1901898~negative regulation of relaxation of cardiac muscle	2	0.630915	0.0351792	PDE4D, PDE4B	299	2	16792	56.1605	1	1	0.994277
GOTERM_BP_DIRECT	GO:0006116~NADH oxidation	2	0.630915	0.0351792	ALDOB, PCK2	299	2	16792	56.1605	1	1	0.994277
GOTERM_BP_DIRECT	GO:0071300~cellular response to retinoic acid	5	1.57729	0.035767	YAP1, CYP26B1, MYC, PPARG, SOX9	299	70	16792	4.01147	1	1	0.994277
GOTERM_BP_DIRECT	GO:0032024~positive regulation of insulin secretion	4	1.26183	0.0359284	SERP1, IRS2, GLUL, PCK2	299	41	16792	5.47908	1	1	0.994277
GOTERM_BP_DIRECT	GO:0042981~regulation of apoptotic process	9	2.83912	0.0364743	BNIP3L, BMP10, PRELID1, TGFB3, TNFRSF14, SOX9, OLFM4, BMP7, MCL1	299	213	16792	2.37298	1	1	0.994277
GOTERM_BP_DIRECT	GO:0007595~lactation	4	1.26183	0.0381995	UPRT, CDO1, HIF1A, VEGFA	299	42	16792	5.34862	1	1	0.994277
GOTERM_BP_DIRECT	GO:0001541~ovarian follicle development	4	1.26183	0.0381995	CEBPB, MYC, KMT2B, VEGFA	299	42	16792	5.34862	1	1	0.994277
GOTERM_BP_DIRECT	GO:0051496~positive regulation of stress fiber assembly	4	1.26183	0.0381995	RGCC, MYOC, TGFB3, CTGF	299	42	16792	5.34862	1	1	0.994277
GOTERM_BP_DIRECT	GO:0008284~positive regulation of cell proliferation	15	4.73186	0.0394074	YAP1, HDAC4, CNTFR, IL34, ODC1, IGF2, IRS2, EGFR, CTGF, VEGFA, MYC, MDM2, MAPK1, SOX9, FGFR2	299	466	16792	1.80774	1	1	0.994277
GOTERM_BP_DIRECT	GO:0001709~cell fate determination	3	0.946372	0.0398325	CYP26B1, DSCAML1, MCL1	299	18	16792	9.36009	1	1	0.994277
GOTERM_BP_DIRECT	GO:0045893~positive regulation of transcription, DNA-templated	16	5.04732	0.0420456	HDAC4, BMP10, TGFB3, DLX5, ZBTB16, NCOA4, BMP7, HIF1A, GLIS2, LBH, MYC, MAPK1, MAPRE3, PPARG, SOX9, KDM7A	299	515	16792	1.74479	1	1	0.994277
GOTERM_BP_DIRECT	GO:0043065~positive regulation of apoptotic process	11	3.47003	0.0422011	BNIP3L, LDHA, BCL2L11, AIFM1, TGFB3, FRZB, ZBTB16, KCNMA1, TXNIP, CYP1B1, BMP7	299	300	16792	2.05922	1	1	0.994277
GOTERM_BP_DIRECT	GO:0032332~positive regulation of chondrocyte differentiation	3	0.946372	0.0440078	ZBTB16, SOX9, LOXL2	299	19	16792	8.86745	1	1	0.994277
GOTERM_BP_DIRECT	GO:0009116~nucleoside metabolic process	3	0.946372	0.0440078	PNP, UPRT, UPP1	299	19	16792	8.86745	1	1	0.994277
GOTERM_BP_DIRECT	GO:0042493~response to drug	11	3.47003	0.0452455	SPINK4, HDAC4, LDHA, PNP, LOX, MYC, MDM2, CYP1A1, TXNIP, WFDC1, PPARG	299	304	16792	2.03212	1	1	0.994277
GOTERM_BP_DIRECT	GO:0051591~response to cAMP	4	1.26183	0.047994	LDHA, BSG, CREM, CDO1	299	46	16792	4.88352	1	1	0.994277
GOTERM_BP_DIRECT	GO:0032869~cellular response to insulin stimulus	5	1.57729	0.0480261	EEF2K, MYC, PDE3B, IRS2, PPARG	299	77	16792	3.64679	1	1	0.994277
GOTERM_BP_DIRECT	GO:0045454~cell redox homeostasis	5	1.57729	0.0480261	ERO1A, EGLN2, NCF1, AIFM1, NCF2	299	77	16792	3.64679	1	1	0.994277
GOTERM_BP_DIRECT	GO:0006123~mitochondrial electron transport, cytochrome c to oxygen	3	0.946372	0.0483372	NDUFA4, COX4I1, COX5B	299	20	16792	8.42408	1	1	0.994277
GOTERM_BP_DIRECT	GO:0051781~positive regulation of cell division	4	1.26183	0.050617	TGFB3, IGF2, FGFR2, VEGFA	299	47	16792	4.77962	1	1	0.994277
GOTERM_BP_DIRECT	GO:0045600~positive regulation of fat cell differentiation	4	1.26183	0.050617	CEBPB, FRZB, ZBTB16, PPARG	299	47	16792	4.77962	1	1	0.994277
GOTERM_BP_DIRECT	GO:1902414~protein localization to cell junction	2	0.630915	0.0523035	NECTIN3, NECTIN1	299	3	16792	37.4404	1	1	0.994277
GOTERM_BP_DIRECT	GO:1901857~positive regulation of cellular respiration	2	0.630915	0.0523035	PRELID1, MYC	299	3	16792	37.4404	1	1	0.994277
GOTERM_BP_DIRECT	GO:0021502~neural fold elevation formation	2	0.630915	0.0523035	HIF1A, BMP7	299	3	16792	37.4404	1	1	0.994277
GOTERM_BP_DIRECT	GO:0005980~glycogen catabolic process	3	0.946372	0.0528141	PYGM, GYG1, PGM1	299	21	16792	8.02293	1	1	0.994277
GOTERM_BP_DIRECT	GO:0001503~ossification	5	1.57729	0.0539069	IGF2, SOX9, BMP7, EGFR, CTGF	299	80	16792	3.51003	1	1	0.994277
GOTERM_BP_DIRECT	GO:0031334~positive regulation of protein complex assembly	3	0.946372	0.0574318	FNIP1, FNIP2, VEGFA	299	22	16792	7.65825	1	1	0.994277
GOTERM_BP_DIRECT	GO:0001502~cartilage condensation	3	0.946372	0.0574318	SOX9, BARX2, CTGF	299	22	16792	7.65825	1	1	0.994277
GOTERM_BP_DIRECT	GO:2001243~negative regulation of intrinsic apoptotic signaling pathway	3	0.946372	0.0574318	IVNS1ABP, PLAUR, MCL1	299	22	16792	7.65825	1	1	0.994277
GOTERM_BP_DIRECT	GO:0009880~embryonic pattern specification	3	0.946372	0.0621841	ZBTB16, BMP7, FGFR2	299	23	16792	7.32529	1	1	0.994277
GOTERM_BP_DIRECT	GO:0032967~positive regulation of collagen biosynthetic process	3	0.946372	0.0621841	RGCC, TGFB3, CTGF	299	23	16792	7.32529	1	1	0.994277
GOTERM_BP_DIRECT	GO:0033137~negative regulation of peptidyl-serine phosphorylation	3	0.946372	0.0621841	PDE4D, DDIT4, NCK2	299	23	16792	7.32529	1	1	0.994277
GOTERM_BP_DIRECT	GO:0030308~negative regulation of cell growth	6	1.89274	0.0645137	BMP10, BTG1, FRZB, WFDC1, PPARG, ENO1	299	121	16792	2.78482	1	1	0.994277
GOTERM_BP_DIRECT	GO:0009636~response to toxic substance	5	1.57729	0.064534	AIFM1, TTPA, MDM2, CYP1B1, MAPK1	299	85	16792	3.30356	1	1	0.994277
GOTERM_BP_DIRECT	GO:0007010~cytoskeleton organization	7	2.2082	0.0675239	FMNL1, TUBB6, KRT15, RHOU, SOX9, CDC42BPB, SPTBN2	299	161	16792	2.44176	1	1	0.994277
GOTERM_BP_DIRECT	GO:0002741~positive regulation of cytokine secretion involved in immune response	2	0.630915	0.0691248	F2RL1, TNFRSF14	299	4	16792	28.0803	1	1	0.994277
GOTERM_BP_DIRECT	GO:2000138~positive regulation of cell proliferation involved in heart morphogenesis	2	0.630915	0.0691248	BMP10, SOX9	299	4	16792	28.0803	1	1	0.994277
GOTERM_BP_DIRECT	GO:0061419~positive regulation of transcription from RNA polymerase II promoter in response to hypoxia	2	0.630915	0.0691248	HIF1A, VEGFA	299	4	16792	28.0803	1	1	0.994277
GOTERM_BP_DIRECT	GO:0006778~porphyrin-containing compound metabolic process	2	0.630915	0.0691248	ALAS1, CYP1A1	299	4	16792	28.0803	1	1	0.994277
GOTERM_BP_DIRECT	GO:0046040~IMP metabolic process	2	0.630915	0.0691248	HPRT1, NT5C2	299	4	16792	28.0803	1	1	0.994277
GOTERM_BP_DIRECT	GO:0097411~hypoxia-inducible factor-1alpha signaling pathway	2	0.630915	0.0691248	PDK3, HIF1A	299	4	16792	28.0803	1	1	0.994277
GOTERM_BP_DIRECT	GO:1901203~positive regulation of extracellular matrix assembly	2	0.630915	0.0691248	RGCC, SOX9	299	4	16792	28.0803	1	1	0.994277
GOTERM_BP_DIRECT	GO:0048511~rhythmic process	4	1.26183	0.0708442	TEF, CIPC, CREM, PPARG	299	54	16792	4.16004	1	1	0.994277
GOTERM_BP_DIRECT	GO:0048146~positive regulation of fibroblast proliferation	4	1.26183	0.0708442	MYC, FBLN1, FBRS, EGFR	299	54	16792	4.16004	1	1	0.994277
GOTERM_BP_DIRECT	GO:0002040~sprouting angiogenesis	3	0.946372	0.0720675	RSPO3, LOXL2, JMJD6	299	25	16792	6.73926	1	1	0.994277
GOTERM_BP_DIRECT	GO:0007565~female pregnancy	5	1.57729	0.0737653	IGFBP5, TGFB3, PSG4, UPRT, SLC38A3	299	89	16792	3.15509	1	1	0.994277
GOTERM_BP_DIRECT	GO:0006954~inflammatory response	12	3.78549	0.0748378	HDAC4, CEBPB, CYP26B1, CXCL12, TNFAIP6, IL34, PLA2G4C, FFAR3, F2RL1, TNFRSF14, CDO1, SCG2	299	379	16792	1.77817	1	1	0.994277
GOTERM_BP_DIRECT	GO:0007160~cell-matrix adhesion	5	1.57729	0.0761725	BCAM, BCL2L11, VCAM1, LYVE1, CTGF	299	90	16792	3.12003	1	1	0.994277
GOTERM_BP_DIRECT	GO:0006027~glycosaminoglycan catabolic process	3	0.946372	0.0771869	SDC3, HYAL4, LYVE1	299	26	16792	6.48006	1	1	0.994277
GOTERM_BP_DIRECT	GO:0072661~protein targeting to plasma membrane	3	0.946372	0.0771869	PACS2, WNK3, BSG	299	26	16792	6.48006	1	1	0.994277
GOTERM_BP_DIRECT	GO:0032355~response to estradiol	5	1.57729	0.0786188	MYC, TXNIP, WFDC1, BMP7, CTGF	299	91	16792	3.08574	1	1	0.994277
GOTERM_BP_DIRECT	GO:0042476~odontogenesis	3	0.946372	0.082417	TGFB3, BCOR, FGFR2	299	27	16792	6.24006	1	1	0.994277
GOTERM_BP_DIRECT	GO:0006089~lactate metabolic process	2	0.630915	0.0856486	LDHA, HIF1A	299	5	16792	22.4642	1	1	0.994277
GOTERM_BP_DIRECT	GO:0060850~regulation of transcription involved in cell fate commitment	2	0.630915	0.0856486	CEBPB, PPARG	299	5	16792	22.4642	1	1	0.994277
GOTERM_BP_DIRECT	GO:0002934~desmosome organization	2	0.630915	0.0856486	DSP, NECTIN1	299	5	16792	22.4642	1	1	0.994277
GOTERM_BP_DIRECT	GO:0016477~cell migration	7	2.2082	0.0859449	EFNA1, BTG1, SDC3, NCK2, CDC42BPB, LURAP1, CTGF	299	172	16792	2.2856	1	1	0.994277
GOTERM_BP_DIRECT	GO:0051216~cartilage development	4	1.26183	0.0871742	ZBTB16, SOX9, HIF1A, BMP7	299	59	16792	3.80749	1	1	0.994277
GOTERM_BP_DIRECT	GO:0032007~negative regulation of TOR signaling	3	0.946372	0.0877523	DDIT4, FNIP1, HIF1A	299	28	16792	6.0172	1	1	0.994277
GOTERM_BP_DIRECT	GO:0070374~positive regulation of ERK1 and ERK2 cascade	7	2.2082	0.0903521	GLIPR2, F2RL1, PDE8A, EGFR, FGFR2, CTGF, VEGFA	299	175	16792	2.24642	1	1	0.994277
GOTERM_BP_DIRECT	GO:0051056~regulation of small GTPase mediated signal transduction	6	1.89274	0.0905268	ARHGAP40, FAM13A, ARHGAP29, RHOU, ARHGAP28, ARHGAP24	299	134	16792	2.51465	1	1	0.994277
GOTERM_BP_DIRECT	GO:0048661~positive regulation of smooth muscle cell proliferation	4	1.26183	0.0906155	HDAC4, MYC, EGFR, FGFR2	299	60	16792	3.74404	1	1	0.994277
GOTERM_BP_DIRECT	GO:0043542~endothelial cell migration	3	0.946372	0.0931876	CYP1B1, SCG2, LOXL2	299	29	16792	5.80971	1	1	0.994277
GOTERM_BP_DIRECT	GO:0097421~liver regeneration	3	0.946372	0.0931876	CEBPB, MYC, EGFR	299	29	16792	5.80971	1	1	0.994277
GOTERM_BP_DIRECT	GO:0042149~cellular response to glucose starvation	3	0.946372	0.0931876	HSPA5, SLC2A1, UPP1	299	29	16792	5.80971	1	1	0.994277
GOTERM_BP_DIRECT	GO:0000165~MAPK cascade	9	2.83912	0.0952506	EFNA1, MYC, MAPK1, IRS2, NCAM1, SCG2, EGFR, FGFR2, SPTBN2	299	262	16792	1.92918	1	1	0.994277
GOTERM_BP_DIRECT	GO:0060395~SMAD protein signal transduction	4	1.26183	0.0976645	BMP10, TGFB3, VIM, BMP7	299	62	16792	3.62326	1	1	0.994277
GOTERM_BP_DIRECT	GO:0060325~face morphogenesis	3	0.946372	0.0987176	TGFB3, DLX5, TIPARP	299	30	16792	5.61605	1	1	0.994277

## Sheet: HK up GO BP
Category	GO ID and Term Description	Count	%	p-value	Genes	List Total	Pop Hits	Pop Total	Fold Enrichment	Bonferroni	Benjamini	FDR
GOTERM_BP_DIRECT	GO:0006094~gluconeogenesis	10	3.69004	1.77944e-08	PER2, GPI, PC, GAPDHS, PGK1, ALDOC, SLC25A10, ENO1, PCK1, ALDOA	258	44	16792	14.7921	2.95917e-05	2.95921e-05	2.92185e-05
GOTERM_BP_DIRECT	GO:0061621~canonical glycolysis	8	2.95203	9.30193e-08	GPI, PFKFB4, PKM, GAPDHS, PGK1, ALDOC, ENO1, ALDOA	258	26	16792	20.0262	0.000154679	7.73455e-05	7.63688e-05
GOTERM_BP_DIRECT	GO:0045892~negative regulation of transcription, DNA-templated	25	9.22509	7.72236e-07	KDM5B, CEBPB, KDM5C, CDKN1B, CITED2, CIPC, CREM, ZBTB21, ARID4A, FOXK1, ENO1, HHEX, FZD1, JUN, FOXN3, NR1D1, ZHX1, TBX2, PER2, IRF1, BHLHE40, DEPDC1, MDM2, BCOR, LIMS1	258	499	16792	3.26079	0.0012834	0.000428076	0.00042267
GOTERM_BP_DIRECT	GO:0034097~response to cytokine	9	3.32103	1.13527e-06	JUN, JUND, REL, LIFR, SKIL, RELB, BCL2L1, NFKB2, MCL1	258	52	16792	11.2648	0.00188618	0.00047199	0.00046603
GOTERM_BP_DIRECT	GO:0003151~outflow tract morphogenesis	8	2.95203	5.82946e-06	FZD1, ATF2, JUN, CITED2, NEDD4, HIF1A, TBX2, VEGFA	258	46	16792	11.3192	0.00964758	0.00193888	0.00191439
GOTERM_BP_DIRECT	GO:0006096~glycolytic process	7	2.58303	1.13802e-05	GPI, LDHA, GAPDHS, PGK1, ALDOC, ENO1, ALDOA	258	34	16792	13.3999	0.0187474	0.00315421	0.00311438
GOTERM_BP_DIRECT	GO:0001666~response to hypoxia	13	4.79705	1.38493e-05	EGLN1, EGLN3, CDKN1B, NOS2, CITED2, PLOD1, ATP1B1, HIF1A, VEGFA, LDHA, PKM, DDIT4, HMOX2	258	172	16792	4.91924	0.0227683	0.0032902	0.00324865
GOTERM_BP_DIRECT	GO:0098609~cell-cell adhesion	16	5.90406	1.94184e-05	RAB1A, HSPA5, TWF2, ENO1, CGN, BZW1, CNN2, DNAJB1, SEPT9, LDHA, PKM, ALDOA, PDLIM5, PHLDB2, TBC1D10A, SPTBN2	258	271	16792	3.84267	0.0317773	0.0040366	0.00398563
GOTERM_BP_DIRECT	GO:0055114~oxidation-reduction process	24	8.85609	4.23521e-05	ERO1A, EGLN1, CBR1, KDM5B, EGLN3, KDM5C, NOS2, GLDC, CPOX, PLOD1, HIGD1A, ADO, UEVLD, LDHA, CYP26B1, CYP24A1, P4HA1, BDH1, SCD, CRYZL1, HIF1AN, CDO1, PRODH, KDM7A	258	592	16792	2.63859	0.0680099	0.00782573	0.00772691
GOTERM_BP_DIRECT	GO:0000122~negative regulation of transcription from RNA polymerase II promoter	26	9.5941	0.000119551	RERE, ATF2, CITED2, RELB, HHEX, MNT, NFIL3, HIVEP1, FNIP2, RREB1, SKIL, HBZ, KLF12, JUND, NR1D1, ZHX1, NR0B2, HOPX, NFKB2, TBX2, VEGFA, PER2, BHLHE40, REL, MDM2, BCOR	258	720	16792	2.3503	0.180306	0.0198813	0.0196302
GOTERM_BP_DIRECT	GO:0006986~response to unfolded protein	6	2.21402	0.000432586	DNAJB1, HSP90AA1, HSPA1L, HSPA4, MFN2, UBE2J2	258	42	16792	9.2979	0.513027	0.0653992	0.0645734
GOTERM_BP_DIRECT	GO:0045944~positive regulation of transcription from RNA polymerase II promoter	30	11.0701	0.00052423	RERE, CSRNP1, ATF2, CEBPB, CITED2, CREM, ARID4A, HIF1A, CYR61, RELB, HHEX, CREB3L3, EGLN1, JUN, KLF12, JUND, JAG1, PCGF5, HGF, TFE3, KLF15, NFKB2, VEGFA, TEF, IRF1, REL, F2RL1, NCOA7, MAFK, LPIN1	258	981	16792	1.99038	0.581895	0.0689123	0.0680421
GOTERM_BP_DIRECT	GO:0043434~response to peptide hormone	6	2.21402	0.000538701	HHEX, CDKN1B, BTG1, JUND, GNAI1, GNAI2	258	44	16792	8.87526	0.591842	0.0689123	0.0680421
GOTERM_BP_DIRECT	GO:0005978~glycogen biosynthetic process	5	1.84502	0.000614634	PER2, GYS2, GYS1, PPP1R3C, NR1D1	258	26	16792	12.5164	0.640288	0.0717106	0.070805
GOTERM_BP_DIRECT	GO:0051591~response to cAMP	6	2.21402	0.00066326	LDHA, JUN, JUND, DUSP1, CREM, CDO1	258	46	16792	8.48938	0.668248	0.0717106	0.070805
GOTERM_BP_DIRECT	GO:0051365~cellular response to potassium ion starvation	3	1.10701	0.00069294	JUN, PCK1, SLC38A3	258	3	16792	65.0853	0.684236	0.0717106	0.070805
GOTERM_BP_DIRECT	GO:0031100~organ regeneration	6	2.21402	0.000733061	PKM, ANXA3, HGF, LPIN1, NR0B2, IGF2R	258	47	16792	8.30876	0.70463	0.0717106	0.070805
GOTERM_BP_DIRECT	GO:0061418~regulation of transcription from RNA polymerase II promoter in response to hypoxia	5	1.84502	0.00082182	EGLN1, EGLN3, HIF1AN, HIF1A, VEGFA	258	28	16792	11.6224	0.745193	0.0759271	0.0749683
GOTERM_BP_DIRECT	GO:0006366~transcription from RNA polymerase II promoter	19	7.01107	0.000960045	ATF2, CSRNP1, JUN, CEBPB, JUND, ARID4A, KLF15, HIF1A, AFF4, NFKB2, MNT, TEF, NFIL3, CREB3L3, IRF1, REL, HIVEP1, MAFK, RREB1	258	513	16792	2.41057	0.797562	0.0840292	0.0829681
GOTERM_BP_DIRECT	GO:0046677~response to antibiotic	5	1.84502	0.00137581	PPP2CB, HSP90AA1, MDM2, SKIL, JAK1	258	32	16792	10.1696	0.898688	0.109735	0.108349
GOTERM_BP_DIRECT	GO:0048511~rhythmic process	6	2.21402	0.00138571	KDM5B, KDM5C, TEF, CIPC, CREM, NFKB2	258	54	16792	7.2317	0.900344	0.109735	0.108349
GOTERM_BP_DIRECT	GO:0001570~vasculogenesis	6	2.21402	0.0016328	HHEX, CITED2, TIPARP, KDR, ZFP36L1, VEGFA	258	56	16792	6.97342	0.933964	0.123424	0.121866
GOTERM_BP_DIRECT	GO:0045766~positive regulation of angiogenesis	8	2.95203	0.00195319	BTG1, LRG1, ANXA3, HGF, KDR, HIPK1, HIF1A, VEGFA	258	115	16792	4.52767	0.961277	0.141224	0.139441
GOTERM_BP_DIRECT	GO:0030335~positive regulation of cell migration	10	3.69004	0.00214641	CEMIP, HSPA5, HGF, INSR, KDR, F2RL1, ADAM10, IRS2, CYR61, VEGFA	258	184	16792	3.53724	0.971937	0.144767	0.142939
GOTERM_BP_DIRECT	GO:0042127~regulation of cell proliferation	10	3.69004	0.00222674	CNN2, JUN, EGLN3, HHEX, CDKN1B, JAG1, JUND, NOS2, CXCL2, JAK1	258	185	16792	3.51812	0.975454	0.144767	0.142939
GOTERM_BP_DIRECT	GO:0018401~peptidyl-proline hydroxylation to 4-hydroxy-L-proline	3	1.10701	0.00226335	EGLN1, EGLN3, P4HA1	258	5	16792	39.0512	0.976907	0.144767	0.142939
GOTERM_BP_DIRECT	GO:0007179~transforming growth factor beta receptor signaling pathway	7	2.58303	0.00288482	JUN, CITED2, GDF15, PXN, CGN, MTMR4, SKIL	258	92	16792	4.95214	0.991806	0.177684	0.17544
GOTERM_BP_DIRECT	GO:0071456~cellular response to hypoxia	7	2.58303	0.00356597	ERO1A, BNIP3L, MDM2, PCK1, HIF1A, ZFP36L1, VEGFA	258	96	16792	4.7458	0.99737	0.206165	0.203561
GOTERM_BP_DIRECT	GO:0007595~lactation	5	1.84502	0.00380049	UPRT, ATP7A, CDO1, HIF1A, VEGFA	258	42	16792	7.74825	0.998222	0.206165	0.203561
GOTERM_BP_DIRECT	GO:0009749~response to glucose	6	2.21402	0.00384231	GYS2, LDHA, CDKN1B, IRS2, NR0B2, SIDT2	258	68	16792	5.74282	0.998342	0.206165	0.203561
GOTERM_BP_DIRECT	GO:0051894~positive regulation of focal adhesion assembly	4	1.47601	0.00384311	SDC4, KDR, LIMS1, VEGFA	258	21	16792	12.3972	0.998344	0.206165	0.203561
GOTERM_BP_DIRECT	GO:0030855~epithelial cell differentiation	6	2.21402	0.00435263	FZD1, CBR1, TOLLIP, PGK1, ALDOC, VEGFA	258	70	16792	5.57874	0.999293	0.226201	0.223344
GOTERM_BP_DIRECT	GO:0048010~vascular endothelial growth factor receptor signaling pathway	6	2.21402	0.00490951	HSP90AA1, PXN, KDR, ACTB, ACTG1, VEGFA	258	72	16792	5.42377	0.999721	0.247364	0.244241
GOTERM_BP_DIRECT	GO:0010629~negative regulation of gene expression	8	2.95203	0.00517153	PC, NOS2, CITED2, TIPARP, INPPL1, REL, FLOT2, NR0B2	258	137	16792	3.8006	0.99982	0.247364	0.244241
GOTERM_BP_DIRECT	GO:0009791~post-embryonic development	6	2.21402	0.0052061	CSRNP1, KDM5B, TIPARP, INPPL1, ACO1, IGF2R	258	73	16792	5.34947	0.99983	0.247364	0.244241
GOTERM_BP_DIRECT	GO:0001889~liver development	6	2.21402	0.00551516	JUN, PKM, CITED2, HGF, AACS, IGF2R	258	74	16792	5.27718	0.999899	0.25477	0.251552
GOTERM_BP_DIRECT	GO:0007623~circadian rhythm	6	2.21402	0.00583695	PER2, JUN, JUND, NOS2, NFIL3, NR1D1	258	75	16792	5.20682	0.999941	0.262347	0.259034
GOTERM_BP_DIRECT	GO:0071236~cellular response to antibiotic	3	1.10701	0.00614776	CDKN1B, HSPA5, MDM2	258	8	16792	24.407	0.999965	0.269045	0.265648
GOTERM_BP_DIRECT	GO:0007569~cell aging	4	1.47601	0.00635363	MNT, CITED2, LIMS1, TBX2	258	25	16792	10.4136	0.999975	0.270926	0.267504
GOTERM_BP_DIRECT	GO:0032869~cellular response to insulin stimulus	6	2.21402	0.00651981	EEF2K, INSR, IRS2, PCK1, LPIN1, ZFP36L1	258	77	16792	5.07158	0.999981	0.271061	0.267638
GOTERM_BP_DIRECT	GO:0010628~positive regulation of gene expression	11	4.05904	0.00725541	CNN2, KDM5B, CYP26B1, NFIL3, CITED2, MDM2, EIF2AK3, HIF1A, NR0B2, LIMS1, VEGFA	258	262	16792	2.73259	0.999994	0.294287	0.29057
GOTERM_BP_DIRECT	GO:0007219~Notch signaling pathway	7	2.58303	0.00852391	PTP4A3, HHEX, CDKN1B, JAG1, ADAM10, NR0B2, TBX2	258	115	16792	3.96171	0.999999	0.337506	0.333244
GOTERM_BP_DIRECT	GO:0006000~fructose metabolic process	3	1.10701	0.00968285	PFKFB4, ALDOC, ALDOA	258	10	16792	19.5256	1	0.374479	0.36975
GOTERM_BP_DIRECT	GO:0032922~circadian regulation of gene expression	5	1.84502	0.0112265	PER2, BHLHE40, CREM, NR1D1, RELB	258	57	16792	5.70923	1	0.42431	0.418952
GOTERM_BP_DIRECT	GO:0050927~positive regulation of positive chemotaxis	3	1.10701	0.011716	KDR, F2RL1, VEGFA	258	11	16792	17.7505	1	0.43297	0.427503
GOTERM_BP_DIRECT	GO:0051726~regulation of cell cycle	7	2.58303	0.0120868	PER2, JUN, MNT, JUND, CCNG2, IRF1, GADD45G	258	124	16792	3.67417	1	0.436723	0.431208
GOTERM_BP_DIRECT	GO:0008284~positive regulation of cell proliferation	15	5.53506	0.012891	FGFBP1, CDKN1B, HGF, INSR, ODC1, ADAM10, LIFR, IRS2, HIPK1, GNAI2, TBX2, VEGFA, MDM2, KDR, BCL2L1	258	466	16792	2.09502	1	0.436723	0.431208
GOTERM_BP_DIRECT	GO:0006470~protein dephosphorylation	7	2.58303	0.013002	PTPRD, PPP2CB, PPP1R3C, PPP1R3D, PPM1K, MTMR4, PPM1D	258	126	16792	3.61585	1	0.436723	0.431208
GOTERM_BP_DIRECT	GO:0045669~positive regulation of osteoblast differentiation	5	1.84502	0.0133769	CEBPB, JAG1, JUND, HGF, CYR61	258	60	16792	5.42377	1	0.436723	0.431208
GOTERM_BP_DIRECT	GO:0036499~PERK-mediated unfolded protein response	3	1.10701	0.0139184	IGFBP1, HSPA5, EIF2AK3	258	12	16792	16.2713	1	0.436723	0.431208
GOTERM_BP_DIRECT	GO:0034329~cell junction assembly	3	1.10701	0.0139184	ACTB, LIMS1, ACTG1	258	12	16792	16.2713	1	0.436723	0.431208
GOTERM_BP_DIRECT	GO:0048596~embryonic camera-type eye morphogenesis	3	1.10701	0.0139184	CITED2, HIPK1, TBX2	258	12	16792	16.2713	1	0.436723	0.431208
GOTERM_BP_DIRECT	GO:1990440~positive regulation of transcription from RNA polymerase II promoter in response to endoplasmic reticulum stress	3	1.10701	0.0139184	CEBPB, CREB3L3, HSPA5	258	12	16792	16.2713	1	0.436723	0.431208
GOTERM_BP_DIRECT	GO:0035909~aorta morphogenesis	3	1.10701	0.0162846	JAG1, LRP1, TBX2	258	13	16792	15.0197	1	0.501504	0.495171
GOTERM_BP_DIRECT	GO:0045821~positive regulation of glycolytic process	3	1.10701	0.0188089	INSR, GAPDHS, HIF1A	258	14	16792	13.9468	1	0.568713	0.561532
GOTERM_BP_DIRECT	GO:0006006~glucose metabolic process	5	1.84502	0.0193636	INPPL1, GAPDHS, CREM, IRS2, PCK1	258	67	16792	4.85711	1	0.575031	0.567769
GOTERM_BP_DIRECT	GO:0001938~positive regulation of endothelial cell proliferation	5	1.84502	0.0213332	JUN, LRG1, KDR, HIF1A, VEGFA	258	69	16792	4.71632	1	0.61606	0.608281
GOTERM_BP_DIRECT	GO:0090141~positive regulation of mitochondrial fission	3	1.10701	0.0214862	DDHD2, KDR, MIEF1	258	15	16792	13.0171	1	0.61606	0.608281
GOTERM_BP_DIRECT	GO:0048593~camera-type eye morphogenesis	3	1.10701	0.024311	SHROOM2, MFN2, VEGFA	258	16	16792	12.2035	1	0.685241	0.676588
GOTERM_BP_DIRECT	GO:0001701~in utero embryonic development	8	2.95203	0.0252333	GPI, SLC34A2, HHEX, ZFAND5, ADAM10, ATP7A, BCL2L1, VEGFA	258	187	16792	2.7844	1	0.699382	0.690551
GOTERM_BP_DIRECT	GO:0006879~cellular iron ion homeostasis	4	1.47601	0.0296042	EGLN1, ACO1, HIF1A, HMOX2	258	44	16792	5.91684	1	0.789492	0.779523
GOTERM_BP_DIRECT	GO:0061402~positive regulation of transcription from RNA polymerase II promoter in response to acidic pH	2	0.738007	0.0303765	PCK1, SLC38A3	258	2	16792	65.0853	1	0.789492	0.779523
GOTERM_BP_DIRECT	GO:0018205~peptidyl-lysine modification	2	0.738007	0.0303765	MDM2, ATP7A	258	2	16792	65.0853	1	0.789492	0.779523
GOTERM_BP_DIRECT	GO:0001709~cell fate determination	3	1.10701	0.0303833	CYP26B1, JAG1, MCL1	258	18	16792	10.8475	1	0.789492	0.779523
GOTERM_BP_DIRECT	GO:0030968~endoplasmic reticulum unfolded protein response	4	1.47601	0.0313701	ERO1A, CREB3L3, HSPA5, EIF2AK3	258	45	16792	5.78536	1	0.790431	0.78045
GOTERM_BP_DIRECT	GO:0032870~cellular response to hormone stimulus	4	1.47601	0.0313701	JUN, JUND, DUSP1, SIK2	258	45	16792	5.78536	1	0.790431	0.78045
GOTERM_BP_DIRECT	GO:0008637~apoptotic mitochondrial changes	3	1.10701	0.0336209	PPP2CB, BCL2L1, MCL1	258	19	16792	10.2766	1	0.834502	0.823964
GOTERM_BP_DIRECT	GO:0001892~embryonic placenta development	3	1.10701	0.0369864	CEBPB, CITED2, HIF1A	258	20	16792	9.76279	1	0.904536	0.893114
GOTERM_BP_DIRECT	GO:0021762~substantia nigra development	4	1.47601	0.0389722	LDHA, CNP, HSPA5, ACTB	258	49	16792	5.31308	1	0.935311	0.9235
GOTERM_BP_DIRECT	GO:0006357~regulation of transcription from RNA polymerase II promoter	13	4.79705	0.0393697	ATF2, KLF12, ZNF395, JUND, ARID4A, FOXK1, HOPX, RELB, NFKB2, VEGFA, TEF, MAFK, LPIN1	258	441	16792	1.91861	1	0.935311	0.9235
GOTERM_BP_DIRECT	GO:0007568~aging	7	2.58303	0.0416201	IGFBP1, JUN, JUND, CNP, LRP1, PCK1, NFKB2	258	165	16792	2.76119	1	0.96791	0.955687
GOTERM_BP_DIRECT	GO:0008285~negative regulation of cell proliferation	12	4.42804	0.0419059	BTG3, JUN, FGFBP1, MNT, CDKN1B, SCIN, BTG1, IRF1, MXI1, INPPL1, PPM1D, TOB2	258	396	16792	1.97228	1	0.96791	0.955687
GOTERM_BP_DIRECT	GO:0042542~response to hydrogen peroxide	4	1.47601	0.0430922	PPP2CB, LDHA, JUN, DUSP1	258	51	16792	5.10473	1	0.977461	0.965118
GOTERM_BP_DIRECT	GO:0045736~negative regulation of cyclin-dependent protein serine/threonine kinase activity	3	1.10701	0.0440827	HHEX, CDKN1B, TNFAIP3	258	22	16792	8.87526	1	0.977461	0.965118
GOTERM_BP_DIRECT	GO:2001243~negative regulation of intrinsic apoptotic signaling pathway	3	1.10701	0.0440827	IVNS1ABP, BCL2L1, MCL1	258	22	16792	8.87526	1	0.977461	0.965118
GOTERM_BP_DIRECT	GO:0034140~negative regulation of toll-like receptor 3 signaling pathway	2	0.738007	0.0452182	F2RL1, TNFAIP3	258	3	16792	43.3902	1	0.989446	0.976952
GOTERM_BP_DIRECT	GO:0042981~regulation of apoptotic process	8	2.95203	0.0464741	BNIP3L, DUSP1, GDF15, TP53BP2, RABGGTB, SKIL, BCL2L1, MCL1	258	213	16792	2.44452	1	1	0.987966
GOTERM_BP_DIRECT	GO:0043066~negative regulation of apoptotic process	13	4.79705	0.0475634	BNIP3L, CDKN1B, HSPA5, CITED2, DUSP1, HIGD1A, CYR61, VEGFA, EEF2K, MDM2, KDR, MCL1, BCL2L1	258	455	16792	1.85958	1	1	0.987966
GOTERM_BP_DIRECT	GO:0016239~positive regulation of macroautophagy	3	1.10701	0.0478045	BNIP3L, KDR, HIF1A	258	23	16792	8.48938	1	1	0.987966
GOTERM_BP_DIRECT	GO:0016477~cell migration	7	2.58303	0.049103	RAB1A, BTG1, SDC4, ARPC5L, SHROOM2, CDC42BPB, JAK1	258	172	16792	2.64882	1	1	0.987966
GOTERM_BP_DIRECT	GO:0045893~positive regulation of transcription, DNA-templated	14	5.16605	0.0538237	FZD1, JUN, CITED2, INSR, TFE3, NCOA4, FOXK1, NR1D1, FOXN3, HIF1A, KLF6, IRF1, RREB1, KDM7A	258	515	16792	1.76931	1	1	0.987966
GOTERM_BP_DIRECT	GO:0001525~angiogenesis	8	2.95203	0.0561032	GPI, JUN, JAG1, EIF2AK3, KDR, PNPLA6, HIF1A, VEGFA	258	223	16792	2.3349	1	1	0.987966
GOTERM_BP_DIRECT	GO:0030182~neuron differentiation	5	1.84502	0.0580447	FZD1, PTPRD, CEBPB, DDIT4, HIPK1	258	95	16792	3.42554	1	1	0.987966
GOTERM_BP_DIRECT	GO:0061419~positive regulation of transcription from RNA polymerase II promoter in response to hypoxia	2	0.738007	0.0598337	HIF1A, VEGFA	258	4	16792	32.5426	1	1	0.987966
GOTERM_BP_DIRECT	GO:0061428~negative regulation of transcription from RNA polymerase II promoter in response to hypoxia	2	0.738007	0.0598337	CITED2, HIF1AN	258	4	16792	32.5426	1	1	0.987966
GOTERM_BP_DIRECT	GO:0001922~B-1 B cell homeostasis	2	0.738007	0.0598337	TNFAIP3, HIF1A	258	4	16792	32.5426	1	1	0.987966
GOTERM_BP_DIRECT	GO:0072606~interleukin-8 secretion	2	0.738007	0.0598337	RAB1A, NOS2	258	4	16792	32.5426	1	1	0.987966
GOTERM_BP_DIRECT	GO:0030097~hemopoiesis	4	1.47601	0.0616245	CNN2, JAG1, TIPARP, MKNK2	258	59	16792	4.41256	1	1	0.987966
GOTERM_BP_DIRECT	GO:0045732~positive regulation of protein catabolic process	4	1.47601	0.0641638	CDKN1B, TIPARP, NEDD4, TNFAIP3	258	60	16792	4.33902	1	1	0.987966
GOTERM_BP_DIRECT	GO:0035335~peptidyl-tyrosine dephosphorylation	5	1.84502	0.0655405	PTPRD, PTP4A3, DUSP1, MTMR4, DUSP8	258	99	16792	3.28713	1	1	0.987966
GOTERM_BP_DIRECT	GO:0007050~cell cycle arrest	6	2.21402	0.0657369	CDKN1B, CAB39L, IRF1, MFN2, PRKAG2, SKIL	258	141	16792	2.76959	1	1	0.987966
GOTERM_BP_DIRECT	GO:0010468~regulation of gene expression	5	1.84502	0.0674897	PPP2CB, ATP1B1, TOB2, HIF1A, ZFP36L1	258	100	16792	3.25426	1	1	0.987966
GOTERM_BP_DIRECT	GO:0009314~response to radiation	3	1.10701	0.0679811	JUN, JUND, PPM1D	258	28	16792	6.97342	1	1	0.987966
GOTERM_BP_DIRECT	GO:0042593~glucose homeostasis	5	1.84502	0.0694688	GPI, INSR, PCK1, HIF1A, SIDT2	258	101	16792	3.22204	1	1	0.987966
GOTERM_BP_DIRECT	GO:0005977~glycogen metabolic process	3	1.10701	0.0723018	PPP1R3C, PPP1R3D, PRKAG2	258	29	16792	6.73296	1	1	0.987966
GOTERM_BP_DIRECT	GO:0006754~ATP biosynthetic process	3	1.10701	0.0723018	PKM, PRKAG2, ALDOA	258	29	16792	6.73296	1	1	0.987966
GOTERM_BP_DIRECT	GO:0048008~platelet-derived growth factor receptor signaling pathway	3	1.10701	0.0723018	CSRNP1, TIPARP, ZFAND5	258	29	16792	6.73296	1	1	0.987966
GOTERM_BP_DIRECT	GO:0042149~cellular response to glucose starvation	3	1.10701	0.0723018	HSPA5, SLC2A1, EIF2AK3	258	29	16792	6.73296	1	1	0.987966
GOTERM_BP_DIRECT	GO:0045661~regulation of myoblast differentiation	2	0.738007	0.0742263	FLOT2, ZFP36L1	258	5	16792	26.0341	1	1	0.987966
GOTERM_BP_DIRECT	GO:0045040~protein import into mitochondrial outer membrane	2	0.738007	0.0742263	HSP90AA1, HSPA4	258	5	16792	26.0341	1	1	0.987966
GOTERM_BP_DIRECT	GO:0006089~lactate metabolic process	2	0.738007	0.0742263	LDHA, HIF1A	258	5	16792	26.0341	1	1	0.987966
GOTERM_BP_DIRECT	GO:0038033~positive regulation of endothelial cell chemotaxis by VEGF-activated vascular endothelial growth factor receptor signaling pathway	2	0.738007	0.0742263	KDR, VEGFA	258	5	16792	26.0341	1	1	0.987966
GOTERM_BP_DIRECT	GO:0061156~pulmonary artery morphogenesis	2	0.738007	0.0742263	JAG1, CITED2	258	5	16792	26.0341	1	1	0.987966
GOTERM_BP_DIRECT	GO:0061734~parkin-mediated mitophagy in response to mitochondrial depolarization	2	0.738007	0.0742263	MFN2, OPTN	258	5	16792	26.0341	1	1	0.987966
GOTERM_BP_DIRECT	GO:0043627~response to estrogen	4	1.47601	0.0775637	SLC34A2, LDHA, HSP90AA1, CITED2	258	65	16792	4.00525	1	1	0.987966
GOTERM_BP_DIRECT	GO:0014068~positive regulation of phosphatidylinositol 3-kinase signaling	4	1.47601	0.0775637	HGF, NEDD4, KDR, F2RL1	258	65	16792	4.00525	1	1	0.987966
GOTERM_BP_DIRECT	GO:0006464~cellular protein modification process	5	1.84502	0.07768	ERO1A, UEVLD, PLOD1, RABGGTB, RIMKLA	258	105	16792	3.0993	1	1	0.987966
GOTERM_BP_DIRECT	GO:0038061~NIK/NF-kappaB signaling	4	1.47601	0.08038	PSME4, REL, RELB, NFKB2	258	66	16792	3.94456	1	1	0.987966
GOTERM_BP_DIRECT	GO:0050790~regulation of catalytic activity	4	1.47601	0.08038	GPSM1, GRPEL1, PPP1R3C, PRKAG2	258	66	16792	3.94456	1	1	0.987966
GOTERM_BP_DIRECT	GO:0032868~response to insulin	4	1.47601	0.0832401	PKM, INPPL1, UPRT, PCK1	258	67	16792	3.88569	1	1	0.987966
GOTERM_BP_DIRECT	GO:0048705~skeletal system morphogenesis	3	1.10701	0.085767	CSRNP1, TIPARP, ZFAND5	258	32	16792	6.10174	1	1	0.987966
GOTERM_BP_DIRECT	GO:0001974~blood vessel remodeling	3	1.10701	0.085767	JAG1, MDM2, ATP7A	258	32	16792	6.10174	1	1	0.987966
GOTERM_BP_DIRECT	GO:0050873~brown fat cell differentiation	3	1.10701	0.085767	ERO1A, CEBPB, LRG1	258	32	16792	6.10174	1	1	0.987966
GOTERM_BP_DIRECT	GO:0032364~oxygen homeostasis	2	0.738007	0.0883994	EGLN1, HIF1A	258	6	16792	21.6951	1	1	0.987966
GOTERM_BP_DIRECT	GO:0043154~negative regulation of cysteine-type endopeptidase activity involved in apoptotic process	4	1.47601	0.0890894	GPI, HGF, MDM2, VEGFA	258	69	16792	3.77306	1	1	0.987966
GOTERM_BP_DIRECT	GO:0002931~response to ischemia	3	1.10701	0.0904113	PER2, EEF2K, SLC26A5	258	33	16792	5.91684	1	1	0.987966
GOTERM_BP_DIRECT	GO:0010634~positive regulation of epithelial cell migration	3	1.10701	0.0904113	JUN, HIF1A, RREB1	258	33	16792	5.91684	1	1	0.987966
GOTERM_BP_DIRECT	GO:0001837~epithelial to mesenchymal transition	3	1.10701	0.0951278	HGF, HIF1A, LIMS1	258	34	16792	5.74282	1	1	0.987966
GOTERM_BP_DIRECT	GO:0097192~extrinsic apoptotic signaling pathway in absence of ligand	3	1.10701	0.0951278	MKNK2, BCL2L1, MCL1	258	34	16792	5.74282	1	1	0.987966
GOTERM_BP_DIRECT	GO:0042493~response to drug	9	3.32103	0.0959017	FZD1, LDHA, HSP90AA1, JUN, CDKN1B, JUND, MDM2, AACS, SLC26A5	258	304	16792	1.92687	1	1	0.987966
GOTERM_BP_DIRECT	GO:0050918~positive chemotaxis	3	1.10701	0.0999133	HGF, SAA1, VEGFA	258	35	16792	5.57874	1	1	0.987966

## Sheet: Liver up GO BP
Category	GO ID and Term Description	Count	%	p-value	Genes	List Total	Pop Hits	Pop Total	Fold Enrichment	Bonferroni	Benjamini	FDR
GOTERM_BP_DIRECT	GO:0045892~negative regulation of transcription, DNA-templated	34	10.0592	3.18123e-10	HDAC5, CEBPB, CDKN1B, CITED2, CIPC, GMNN, BHLHE41, CREM, ZBTB21, ARID4A, FOXK1, AHR, ENO1, FOXO1, CIART, HHEX, PPARGC1B, FZD1, JUN, NR1D2, FOXN3, NR1D1, ZHX1, TBX2, PER2, PER1, IRF1, DDIT3, BHLHE40, DEPDC1, MDM2, PPARG, BCOR, LIMS1	315	499	16792	3.6322	6.48652e-07	6.48652e-07	6.39745e-07
GOTERM_BP_DIRECT	GO:0006094~gluconeogenesis	11	3.25444	6.40331e-09	PER2, GPI, CRTC2, GPD2, GAPDHS, ALDOC, SLC25A10, ENO1, PCK1, ALDOA, ATF3	315	44	16792	13.327	1.30563e-05	6.52818e-06	6.43853e-06
GOTERM_BP_DIRECT	GO:0034097~response to cytokine	11	3.25444	3.57642e-08	CD274, JUN, JUND, SRF, REL, LIFR, SKIL, RELB, BCL2L1, NFKB2, MCL1	315	52	16792	11.2767	7.29206e-05	2.43078e-05	2.3974e-05
GOTERM_BP_DIRECT	GO:0045944~positive regulation of transcription from RNA polymerase II promoter	45	13.3136	6.01305e-08	HDAC5, ATF2, CEBPB, CRTC2, CITED2, SRF, CEBPG, CREM, ARID4A, AHR, HIF1A, FOXO1, CYR61, EGFR, RELB, HHEX, TBK1, CREB3L3, NRIP1, NAMPT, PPARGC1B, MKL2, EGLN1, SREBF1, JUN, KLF12, MEF2C, JUND, PCGF5, HGF, TFE3, NFKB2, VEGFA, NFKBIA, PER1, TEF, IRF1, DDIT3, REL, F2RL1, NCOA7, PPARG, MAFK, LPIN1, ATF3	315	981	16792	2.44532	0.000122599	3.06515e-05	3.02306e-05
GOTERM_BP_DIRECT	GO:0032922~circadian regulation of gene expression	11	3.25444	8.98766e-08	PER2, PER1, NAMPT, BHLHE40, NRIP1, BHLHE41, CREM, AHR, NR1D1, RELB, CIART	315	57	16792	10.2875	0.000183242	3.66517e-05	3.61483e-05
GOTERM_BP_DIRECT	GO:0000122~negative regulation of transcription from RNA polymerase II promoter	35	10.355	6.9674e-07	HDAC5, ATF2, CITED2, BHLHE41, FOXO1, RELB, HHEX, MNT, XPO1, NFIL3, NRIP1, HIVEP1, FNIP2, RREB1, SKIL, SREBF1, KLF12, MEF2C, JUND, NR1D1, ZHX1, HOPX, NFKB2, TBX2, VEGFA, PER2, PER1, DDIT3, BHLHE40, REL, ERF, MDM2, PPARG, BCOR, ATF3	315	720	16792	2.59136	0.00141964	0.000236775	0.000233524
GOTERM_BP_DIRECT	GO:0001666~response to hypoxia	16	4.73373	8.49052e-07	EGLN1, EGLN3, CDKN1B, NOS2, CITED2, SRF, PLOD1, ATP1B1, HIF1A, VEGFA, PDLIM1, LDHA, PKM, DDIT4, ANGPTL4, HMOX2	315	172	16792	4.95888	0.00172972	0.000247317	0.00024392
GOTERM_BP_DIRECT	GO:0007623~circadian rhythm	11	3.25444	1.28156e-06	PER2, SREBF1, PER1, JUN, JUND, NOS2, NFIL3, NAMPT, NRIP1, NR1D1, EGFR	315	75	16792	7.8185	0.00260969	0.000326638	0.000322152
GOTERM_BP_DIRECT	GO:0003151~outflow tract morphogenesis	9	2.66272	1.92307e-06	FZD1, ATF2, MEF2C, JUN, CITED2, NEDD4, HIF1A, TBX2, VEGFA	315	46	16792	10.4298	0.00391346	0.000435682	0.000429699
GOTERM_BP_DIRECT	GO:0098609~cell-cell adhesion	19	5.6213	3.6731e-06	MKL2, RAB1A, HSPA5, TWF2, ENO1, CGN, BZW1, CRKL, PDLIM1, CNN2, DNAJB1, SEPT9, LDHA, PKM, EPS8L1, STX5, ALDOA, PDLIM5, PHLDB2	315	271	16792	3.73746	0.00746149	0.000748945	0.00073866
GOTERM_BP_DIRECT	GO:0061621~canonical glycolysis	7	2.07101	6.84434e-06	GPI, PFKFB4, PKM, GAPDHS, ALDOC, ENO1, ALDOA	315	26	16792	14.3521	0.0138587	0.00126869	0.00125127
GOTERM_BP_DIRECT	GO:0051591~response to cAMP	8	2.36686	2.14047e-05	SREBF1, PER1, LDHA, JUN, JUND, DUSP1, CREM, PPARGC1B	315	46	16792	9.27095	0.0427059	0.00363702	0.00358707
GOTERM_BP_DIRECT	GO:0042127~regulation of cell proliferation	14	4.14201	4.65517e-05	JUN, EGLN3, CDKN1B, TNFRSF6B, JUND, NOS2, CXCL2, CNN2, NFKBIA, FA2H, CXCL11, HHEX, TNFRSF14, JAK1	315	185	16792	4.03411	0.0905553	0.00730145	0.00720118
GOTERM_BP_DIRECT	GO:1990440~positive regulation of transcription from RNA polymerase II promoter in response to endoplasmic reticulum stress	5	1.47929	5.27397e-05	CEBPB, CREB3L3, HSPA5, DDIT3, ATF3	315	12	16792	22.2116	0.101959	0.00768116	0.00757568
GOTERM_BP_DIRECT	GO:0032869~cellular response to insulin stimulus	9	2.66272	9.38802e-05	HDAC5, EEF2K, INSR, IRS2, PPARG, PCK1, LPIN1, FOXO1, ZFP36L1	315	77	16792	6.2308	0.174223	0.0127614	0.0125862
GOTERM_BP_DIRECT	GO:0006366~transcription from RNA polymerase II promoter	24	7.10059	0.000103186	ATF2, JUN, MEF2C, CEBPB, JUND, SRF, CEBPG, ARID4A, AHR, HIF1A, AFF4, NFKB2, MNT, TEF, NFIL3, CREB3L3, IRF1, REL, HIVEP1, MAFK, HIVEP2, RREB1, ATF3, CREB5	315	513	16792	2.49394	0.189746	0.0131498	0.0129692
GOTERM_BP_DIRECT	GO:0006986~response to unfolded protein	7	2.07101	0.000121263	DNAJB1, HSP90AA1, HSPA1L, HSPA4, DDIT3, MFN2, UBE2J2	315	42	16792	8.88466	0.219071	0.0145445	0.0143448
GOTERM_BP_DIRECT	GO:0045893~positive regulation of transcription, DNA-templated	23	6.80473	0.000289377	FZD1, JUN, MEF2C, CITED2, INSR, TFE3, NCOA4, FOXK1, NR1D2, AHR, NR1D1, FOXN3, HIF1A, FOXO1, KLF6, IRF1, DDIT3, TP53INP1, NRIP1, PPARG, RREB1, KDM7A, CREB5	315	515	16792	2.38074	0.445742	0.03278	0.0323299
GOTERM_BP_DIRECT	GO:0006096~glycolytic process	6	1.77515	0.000394797	GPI, LDHA, GAPDHS, ALDOC, ENO1, ALDOA	315	34	16792	9.40728	0.552979	0.042368	0.0417862
GOTERM_BP_DIRECT	GO:0001570~vasculogenesis	7	2.07101	0.00060291	HHEX, SGPL1, CITED2, TIPARP, KDR, ZFP36L1, VEGFA	315	56	16792	6.66349	0.707621	0.0614667	0.0606226
GOTERM_BP_DIRECT	GO:0001568~blood vessel development	6	1.77515	0.000669998	MEF2C, MDM2, AHR, ATP7A, FOXO1, CRKL	315	38	16792	8.41704	0.745024	0.0650537	0.0641603
GOTERM_BP_DIRECT	GO:0030335~positive regulation of cell migration	12	3.5503	0.000706407	CD274, CEMIP, HSPA5, HGF, INSR, KDR, F2RL1, ADAM10, IRS2, CYR61, EGFR, VEGFA	315	184	16792	3.4766	0.763279	0.0654711	0.064572
GOTERM_BP_DIRECT	GO:0051365~cellular response to potassium ion starvation	3	0.887574	0.00103277	JUN, PCK1, SLC38A3	315	3	16792	53.3079	0.878386	0.0915571	0.0902998
GOTERM_BP_DIRECT	GO:0036499~PERK-mediated unfolded protein response	4	1.18343	0.001257	HSPA5, DDIT3, EIF2AK3, ATF3	315	12	16792	17.7693	0.923053	0.103758	0.102334
GOTERM_BP_DIRECT	GO:0005978~glycogen biosynthetic process	5	1.47929	0.00129559	PER2, GYS2, GYS1, PPP1R3C, NR1D1	315	26	16792	10.2515	0.928882	0.103758	0.102334
GOTERM_BP_DIRECT	GO:0043434~response to peptide hormone	6	1.77515	0.00132306	HHEX, CDKN1B, BTG1, JUND, GNAI1, GNAI2	315	44	16792	7.26926	0.932761	0.103758	0.102334
GOTERM_BP_DIRECT	GO:0006357~regulation of transcription from RNA polymerase II promoter	19	5.6213	0.00169995	SREBF1, ATF2, BRD2, KLF12, ZNF395, JUND, CEBPG, ARID4A, FOXK1, AHR, HOPX, RELB, NFKB2, VEGFA, TEF, NRIP1, MAFK, LPIN1, ATF3	315	441	16792	2.29671	0.968857	0.125475	0.123752
GOTERM_BP_DIRECT	GO:0061418~regulation of transcription from RNA polymerase II promoter in response to hypoxia	5	1.47929	0.00172305	EGLN1, EGLN3, HIF1AN, HIF1A, VEGFA	315	28	16792	9.51927	0.970292	0.125475	0.123752
GOTERM_BP_DIRECT	GO:0042752~regulation of circadian rhythm	6	1.77515	0.00215325	PER2, PER1, CREM, NR1D2, PPARG, NR1D1	315	49	16792	6.5275	0.987664	0.151395	0.149316
GOTERM_BP_DIRECT	GO:0090141~positive regulation of mitochondrial fission	4	1.18343	0.00249381	DDHD2, KDR, MIEF1, MFF	315	15	16792	14.2154	0.99385	0.169496	0.167168
GOTERM_BP_DIRECT	GO:0001889~liver development	7	2.07101	0.00259968	JUN, PKM, CITED2, HGF, CEBPG, AACS, IGF2R	315	74	16792	5.04264	0.995046	0.170992	0.168644
GOTERM_BP_DIRECT	GO:0046677~response to antibiotic	5	1.47929	0.00285391	PPP2CB, HSP90AA1, MDM2, SKIL, JAK1	315	32	16792	8.32937	0.997054	0.181847	0.17935
GOTERM_BP_DIRECT	GO:0008284~positive regulation of cell proliferation	19	5.6213	0.00307389	FGFBP1, CDKN1B, HGF, INSR, ODC1, ADAM10, LIFR, IRS2, HIPK1, EGFR, GNAI2, CRKL, TBX2, VEGFA, NAMPT, MDM2, KDR, ATF3, BCL2L1	315	466	16792	2.1735	0.998122	0.189929	0.187321
GOTERM_BP_DIRECT	GO:0048511~rhythmic process	6	1.77515	0.00331057	TEF, CIPC, CREM, NR1D2, PPARG, NFKB2	315	54	16792	5.9231	0.998842	0.195627	0.19294
GOTERM_BP_DIRECT	GO:0018401~peptidyl-proline hydroxylation to 4-hydroxy-L-proline	3	0.887574	0.00335798	EGLN1, EGLN3, P4HA1	315	5	16792	31.9848	0.998949	0.195627	0.19294
GOTERM_BP_DIRECT	GO:0030224~monocyte differentiation	4	1.18343	0.00362533	MEF2C, JUN, PPARG, VEGFA	315	17	16792	12.543	0.999392	0.199785	0.197042
GOTERM_BP_DIRECT	GO:0042789~mRNA transcription from RNA polymerase II promoter	4	1.18343	0.00362533	SREBF1, DDIT3, SRF, HIF1A	315	17	16792	12.543	0.999392	0.199785	0.197042
GOTERM_BP_DIRECT	GO:0010629~negative regulation of gene expression	9	2.66272	0.00425995	MEF2C, TBK1, NOS2, CITED2, TIPARP, TP53INP1, INPPL1, REL, FLOT2	315	137	16792	3.50198	0.999834	0.224328	0.221248
GOTERM_BP_DIRECT	GO:0008053~mitochondrial fusion	4	1.18343	0.00429073	BAX, MFN2, MIEF1, MFF	315	18	16792	11.8462	0.999844	0.224328	0.221248
GOTERM_BP_DIRECT	GO:0008637~apoptotic mitochondrial changes	4	1.18343	0.00502542	PPP2CB, BAX, BCL2L1, MCL1	315	19	16792	11.2227	0.999965	0.251761	0.248304
GOTERM_BP_DIRECT	GO:0007050~cell cycle arrest	9	2.66272	0.00506239	CDKN1B, CAB39L, DDIT3, IRF1, TP53INP1, MFN2, PRKAG2, HBP1, SKIL	315	141	16792	3.40263	0.999968	0.251761	0.248304
GOTERM_BP_DIRECT	GO:0045732~positive regulation of protein catabolic process	6	1.77515	0.00522167	CDKN1B, TIPARP, NEDD4, TNFAIP3, STX5, FOXO1	315	60	16792	5.33079	0.999977	0.2535	0.250019
GOTERM_BP_DIRECT	GO:0001892~embryonic placenta development	4	1.18343	0.00583133	CEBPB, CITED2, HIF1A, EGFR	315	20	16792	10.6616	0.999993	0.271994	0.268259
GOTERM_BP_DIRECT	GO:0045766~positive regulation of angiogenesis	8	2.36686	0.00586941	BTG1, LRG1, HGF, KDR, ANGPTL4, HIPK1, HIF1A, VEGFA	315	115	16792	3.70838	0.999994	0.271994	0.268259
GOTERM_BP_DIRECT	GO:0051894~positive regulation of focal adhesion assembly	4	1.18343	0.00671017	SDC4, KDR, LIMS1, VEGFA	315	21	16792	10.1539	0.999999	0.300365	0.29624
GOTERM_BP_DIRECT	GO:0070417~cellular response to cold	3	0.887574	0.00687905	NFKBIA, EIF2AK3, FOXO1	315	7	16792	22.8463	0.999999	0.300365	0.29624
GOTERM_BP_DIRECT	GO:0042981~regulation of apoptotic process	11	3.25444	0.00692357	BNIP3L, DUSP1, GDF15, TP53INP1, TP53BP2, BAX, TNFRSF14, RABGGTB, SKIL, BCL2L1, MCL1	315	213	16792	2.75299	0.999999	0.300365	0.29624
GOTERM_BP_DIRECT	GO:0007179~transforming growth factor beta receptor signaling pathway	7	2.07101	0.00757654	JUN, CITED2, GDF15, PXN, CGN, MTMR4, SKIL	315	92	16792	4.05604	1	0.321845	0.317425
GOTERM_BP_DIRECT	GO:0007049~cell cycle	11	3.25444	0.00785068	SEPT9, PARD6B, PDCD6IP, GMNN, TP53BP2, ERF, AHR, MAPK6, GNAI1, AVPI1, GNAI2	315	217	16792	2.70225	1	0.326684	0.322198
GOTERM_BP_DIRECT	GO:0055114~oxidation-reduction process	21	6.21302	0.00806211	ERO1A, EGLN1, CBR1, EGLN3, NOS2, GLDC, CPOX, PLOD1, ADO, UEVLD, FA2H, LDHA, CYP26B1, P4HA1, BDH1, SCD, GPD2, CRYZL1, HIF1AN, PRODH, KDM7A	315	592	16792	1.89099	1	0.326899	0.32241
GOTERM_BP_DIRECT	GO:0006351~transcription, DNA-templated	52	15.3846	0.00862523	CRTC2, CITED2, BHLHE41, ZBTB21, AHR, ENO1, BZW1, HHEX, HIF1AN, MKL2, BRD2, KLF12, MEF2C, NCOA4, TFE3, ZHX1, DDIT3, ERF, DEPDC1, NCOA7, PPARG, KDM7A, HDAC5, CEBPB, ZNF395, CIPC, CREM, FOXK1, HIF1A, FOXO1, CIART, RELB, NRIP1, TP53INP1, MXI1, PCGF5, MACC1, NR1D2, FOXN3, NR1D1, HIPK1, HOPX, PNRC2, TBX2, PER2, PER1, KLF6, BHLHE40, MAFK, HBP1, BCOR, LPIN1	315	1955	16792	1.41791	1	0.326899	0.32241
GOTERM_BP_DIRECT	GO:0001836~release of cytochrome c from mitochondria	4	1.18343	0.00869274	JUN, BAX, MFF, BCL2L1	315	23	16792	9.27095	1	0.326899	0.32241
GOTERM_BP_DIRECT	GO:0001701~in utero embryonic development	10	2.95858	0.00872387	GPI, SLC34A2, HHEX, SRF, ZFAND5, ADAM10, ATP7A, SEC24D, BCL2L1, VEGFA	315	187	16792	2.85069	1	0.326899	0.32241
GOTERM_BP_DIRECT	GO:0051726~regulation of cell cycle	8	2.36686	0.00875762	PER2, WEE1, JUN, MNT, JUND, CCNG2, IRF1, GADD45G	315	124	16792	3.43922	1	0.326899	0.32241
GOTERM_BP_DIRECT	GO:0030182~neuron differentiation	7	2.07101	0.00881777	FZD1, PTPRD, HDAC5, MEF2C, CEBPB, DDIT4, HIPK1	315	95	16792	3.92795	1	0.326899	0.32241
GOTERM_BP_DIRECT	GO:0071236~cellular response to antibiotic	3	0.887574	0.00905931	CDKN1B, HSPA5, MDM2	315	8	16792	19.9905	1	0.329856	0.325326
GOTERM_BP_DIRECT	GO:0071456~cellular response to hypoxia	7	2.07101	0.00926207	ERO1A, BNIP3L, MDM2, PCK1, HIF1A, ZFP36L1, VEGFA	315	96	16792	3.88704	1	0.331322	0.326772
GOTERM_BP_DIRECT	GO:0030855~epithelial cell differentiation	6	1.77515	0.00995472	FZD1, CBR1, TOLLIP, ALDOC, PPARG, VEGFA	315	70	16792	4.56925	1	0.34996	0.345154
GOTERM_BP_DIRECT	GO:0035335~peptidyl-tyrosine dephosphorylation	7	2.07101	0.0106907	PTPRD, PTP4A3, DUSP1, PTPN23, MTMR4, DUSP8, DUSP16	315	99	16792	3.76925	1	0.369464	0.36439
GOTERM_BP_DIRECT	GO:0007569~cell aging	4	1.18343	0.0109836	MNT, CITED2, LIMS1, TBX2	315	25	16792	8.52927	1	0.37326	0.368134
GOTERM_BP_DIRECT	GO:0048010~vascular endothelial growth factor receptor signaling pathway	6	1.77515	0.0111678	HSP90AA1, PXN, KDR, ACTB, ACTG1, VEGFA	315	72	16792	4.44233	1	0.373299	0.368172
GOTERM_BP_DIRECT	GO:0031100~organ regeneration	5	1.47929	0.0113782	PKM, HGF, PPARG, LPIN1, IGF2R	315	47	16792	5.67106	1	0.374197	0.369058
GOTERM_BP_DIRECT	GO:0043066~negative regulation of apoptotic process	17	5.02959	0.0119732	BNIP3L, CDKN1B, TNFRSF6B, HSPA5, CITED2, DUSP1, CYR61, FOXO1, EGFR, VEGFA, NFKBIA, EEF2K, MDM2, KDR, ANGPTL4, MCL1, BCL2L1	315	455	16792	1.99173	1	0.384514	0.379234
GOTERM_BP_DIRECT	GO:0032496~response to lipopolysaccharide	9	2.66272	0.0121183	CXCL11, JUN, TNFRSF6B, JUND, CNP, TNFRSF14, PCK1, CXCL2, NFKB2	315	164	16792	2.92544	1	0.384514	0.379234
GOTERM_BP_DIRECT	GO:0042493~response to drug	13	3.84615	0.0122577	FZD1, SREBF1, HDAC5, JUN, HSP90AA1, CDKN1B, JUND, AACS, LDHA, XPO1, MDM2, PPARG, SLC26A5	315	304	16792	2.27962	1	0.384514	0.379234
GOTERM_BP_DIRECT	GO:0051091~positive regulation of sequence-specific DNA binding transcription factor activity	7	2.07101	0.0140043	FZD1, ATF2, HDAC5, SRF, CEBPG, PPARG, PPARGC1B	315	105	16792	3.55386	1	0.425931	0.420082
GOTERM_BP_DIRECT	GO:0006983~ER overload response	3	0.887574	0.0142047	HSPA5, DDIT3, EIF2AK3	315	10	16792	15.9924	1	0.425931	0.420082
GOTERM_BP_DIRECT	GO:0006000~fructose metabolic process	3	0.887574	0.0142047	PFKFB4, ALDOC, ALDOA	315	10	16792	15.9924	1	0.425931	0.420082
GOTERM_BP_DIRECT	GO:0006631~fatty acid metabolic process	5	1.47929	0.0160653	PER2, FA2H, SGPL1, CREM, AACS	315	52	16792	5.12576	1	0.474743	0.468223
GOTERM_BP_DIRECT	GO:0050927~positive regulation of positive chemotaxis	3	0.887574	0.0171488	KDR, F2RL1, VEGFA	315	11	16792	14.5385	1	0.499521	0.492661
GOTERM_BP_DIRECT	GO:0006919~activation of cysteine-type endopeptidase activity involved in apoptotic process	6	1.77515	0.01966	EGLN3, CDKN1B, DLC1, EIF2AK3, BAX, PPARG	315	83	16792	3.85359	1	0.564603	0.55685
GOTERM_BP_DIRECT	GO:0048596~embryonic camera-type eye morphogenesis	3	0.887574	0.0203272	CITED2, HIPK1, TBX2	315	12	16792	13.327	1	0.567769	0.559972
GOTERM_BP_DIRECT	GO:0034329~cell junction assembly	3	0.887574	0.0203272	ACTB, LIMS1, ACTG1	315	12	16792	13.327	1	0.567769	0.559972
GOTERM_BP_DIRECT	GO:0001974~blood vessel remodeling	4	1.18343	0.021526	MEF2C, MDM2, BAX, ATP7A	315	32	16792	6.66349	1	0.593128	0.584983
GOTERM_BP_DIRECT	GO:0007507~heart development	9	2.66272	0.0220539	GYS1, MEF2C, CITED2, SRF, PPARG, BCOR, HOPX, ZFP36L1, CRKL	315	183	16792	2.6217	1	0.597352	0.589149
GOTERM_BP_DIRECT	GO:0001822~kidney development	6	1.77515	0.0225513	SGPL1, TIPARP, ODC1, BAX, LZTS2, VEGFA	315	86	16792	3.71916	1	0.597352	0.589149
GOTERM_BP_DIRECT	GO:0002931~response to ischemia	4	1.18343	0.0233585	PER2, MEF2C, EEF2K, SLC26A5	315	33	16792	6.46157	1	0.597352	0.589149
GOTERM_BP_DIRECT	GO:0070059~intrinsic apoptotic signaling pathway in response to endoplasmic reticulum stress	4	1.18343	0.0233585	ERO1A, CEBPB, DDIT3, BAX	315	33	16792	6.46157	1	0.597352	0.589149
GOTERM_BP_DIRECT	GO:0061029~eyelid development in camera-type eye	3	0.887574	0.02373	JUN, SRF, EGFR	315	13	16792	12.3018	1	0.597352	0.589149
GOTERM_BP_DIRECT	GO:0001829~trophectodermal cell differentiation	3	0.887574	0.02373	CITED2, SRF, HOPX	315	13	16792	12.3018	1	0.597352	0.589149
GOTERM_BP_DIRECT	GO:0050872~white fat cell differentiation	3	0.887574	0.02373	PER2, PPARG, AACS	315	13	16792	12.3018	1	0.597352	0.589149
GOTERM_BP_DIRECT	GO:0030097~hemopoiesis	5	1.47929	0.0244183	CNN2, SGPL1, TIPARP, MKNK2, SH2B3	315	59	16792	4.51762	1	0.607182	0.598844
GOTERM_BP_DIRECT	GO:0097192~extrinsic apoptotic signaling pathway in absence of ligand	4	1.18343	0.0252731	MKNK2, BAX, BCL2L1, MCL1	315	34	16792	6.27152	1	0.618644	0.610149
GOTERM_BP_DIRECT	GO:0007249~I-kappaB kinase/NF-kappaB signaling	5	1.47929	0.0257895	TBK1, TIFA, REL, RELB, NFKB2	315	60	16792	4.44233	1	0.618644	0.610149
GOTERM_BP_DIRECT	GO:0045669~positive regulation of osteoblast differentiation	5	1.47929	0.0257895	MEF2C, CEBPB, JUND, HGF, CYR61	315	60	16792	4.44233	1	0.618644	0.610149
GOTERM_BP_DIRECT	GO:0006954~inflammatory response	14	4.14201	0.0261805	HDAC5, CEBPB, TNFRSF6B, TNFAIP3, CXCL2, RELB, NFKB2, CXCL11, CYP26B1, TBK1, TOLLIP, REL, F2RL1, TNFRSF14	315	379	16792	1.96916	1	0.620721	0.612197
GOTERM_BP_DIRECT	GO:0001947~heart looping	5	1.47929	0.0272061	MEF2C, CITED2, SRF, HIF1A, TBX2	315	61	16792	4.3695	1	0.626543	0.617939
GOTERM_BP_DIRECT	GO:0042176~regulation of protein catabolic process	3	0.887574	0.0273479	XPO1, ODC1, MDM2	315	14	16792	11.4231	1	0.626543	0.617939
GOTERM_BP_DIRECT	GO:0045821~positive regulation of glycolytic process	3	0.887574	0.0273479	INSR, GAPDHS, HIF1A	315	14	16792	11.4231	1	0.626543	0.617939
GOTERM_BP_DIRECT	GO:1901998~toxin transport	4	1.18343	0.0293478	CD274, CRTC2, HSPA5, ANTXR2	315	36	16792	5.9231	1	0.664891	0.655761
GOTERM_BP_DIRECT	GO:0002042~cell migration involved in sprouting angiogenesis	3	0.887574	0.0311716	SRF, KDR, VEGFA	315	15	16792	10.6616	1	0.683429	0.674044
GOTERM_BP_DIRECT	GO:0045725~positive regulation of glycogen biosynthetic process	3	0.887574	0.0311716	DYRK2, INSR, IRS2	315	15	16792	10.6616	1	0.683429	0.674044
GOTERM_BP_DIRECT	GO:0048821~erythrocyte development	3	0.887574	0.0311716	CITED2, SRF, ARID4A	315	15	16792	10.6616	1	0.683429	0.674044
GOTERM_BP_DIRECT	GO:0045597~positive regulation of cell differentiation	4	1.18343	0.0315074	JUN, JUND, SRF, CYR61	315	37	16792	5.76302	1	0.683443	0.674058
GOTERM_BP_DIRECT	GO:0001934~positive regulation of protein phosphorylation	7	2.07101	0.0321639	FZD1, FBXO18, INSR, KDR, CYR61, EGFR, VEGFA	315	127	16792	2.93823	1	0.686776	0.677345
GOTERM_BP_DIRECT	GO:0030336~negative regulation of cell migration	6	1.77515	0.0328258	CNN2, CITED2, SRF, DLC1, TP53INP1, VCL	315	95	16792	3.36682	1	0.686776	0.677345
GOTERM_BP_DIRECT	GO:0043627~response to estrogen	5	1.47929	0.0333312	SLC34A2, LDHA, HSP90AA1, CITED2, PPARG	315	65	16792	4.10061	1	0.686776	0.677345
GOTERM_BP_DIRECT	GO:0048593~camera-type eye morphogenesis	3	0.887574	0.0351922	SHROOM2, MFN2, VEGFA	315	16	16792	9.99524	1	0.686776	0.677345
GOTERM_BP_DIRECT	GO:0043162~ubiquitin-dependent protein catabolic process via the multivesicular body sorting pathway	3	0.887574	0.0351922	NEDD4, UBAP1, PTPN23	315	16	16792	9.99524	1	0.686776	0.677345
GOTERM_BP_DIRECT	GO:0035994~response to muscle stretch	3	0.887574	0.0351922	NFKBIA, GPI, JUN	315	16	16792	9.99524	1	0.686776	0.677345
GOTERM_BP_DIRECT	GO:0035162~embryonic hemopoiesis	3	0.887574	0.0351922	KDR, HIF1A, SH2B3	315	16	16792	9.99524	1	0.686776	0.677345
GOTERM_BP_DIRECT	GO:0008285~negative regulation of cell proliferation	14	4.14201	0.0359043	JUN, FGFBP1, CDKN1B, BTG1, SRF, INPPL1, PPM1D, MNT, SCIN, IRF1, DLC1, TP53INP1, MXI1, LZTS2	315	396	16792	1.88462	1	0.686776	0.677345
GOTERM_BP_DIRECT	GO:0006006~glucose metabolic process	5	1.47929	0.0366712	INPPL1, GAPDHS, CREM, IRS2, PCK1	315	67	16792	3.9782	1	0.686776	0.677345
GOTERM_BP_DIRECT	GO:0061402~positive regulation of transcription from RNA polymerase II promoter in response to acidic pH	2	0.591716	0.0370502	PCK1, SLC38A3	315	2	16792	53.3079	1	0.686776	0.677345
GOTERM_BP_DIRECT	GO:0035947~regulation of gluconeogenesis by regulation of transcription from RNA polymerase II promoter	2	0.591716	0.0370502	NR1D1, FOXO1	315	2	16792	53.3079	1	0.686776	0.677345
GOTERM_BP_DIRECT	GO:0019542~propionate biosynthetic process	2	0.591716	0.0370502	ACSS2, ACSS1	315	2	16792	53.3079	1	0.686776	0.677345
GOTERM_BP_DIRECT	GO:0019413~acetate biosynthetic process	2	0.591716	0.0370502	ACSS2, ACSS1	315	2	16792	53.3079	1	0.686776	0.677345
GOTERM_BP_DIRECT	GO:0018205~peptidyl-lysine modification	2	0.591716	0.0370502	MDM2, ATP7A	315	2	16792	53.3079	1	0.686776	0.677345
GOTERM_BP_DIRECT	GO:0007521~muscle cell fate determination	2	0.591716	0.0370502	MEF2C, TBX2	315	2	16792	53.3079	1	0.686776	0.677345
GOTERM_BP_DIRECT	GO:0019427~acetyl-CoA biosynthetic process from acetate	2	0.591716	0.0370502	ACSS2, ACSS1	315	2	16792	53.3079	1	0.686776	0.677345
GOTERM_BP_DIRECT	GO:0009749~response to glucose	5	1.47929	0.038411	GYS2, SREBF1, LDHA, CDKN1B, IRS2	315	68	16792	3.9197	1	0.705586	0.695896
GOTERM_BP_DIRECT	GO:0001938~positive regulation of endothelial cell proliferation	5	1.47929	0.0401973	JUN, LRG1, KDR, HIF1A, VEGFA	315	69	16792	3.86289	1	0.72812	0.718121
GOTERM_BP_DIRECT	GO:0035556~intracellular signal transduction	14	4.14201	0.0404993	KSR1, DUSP1, TUFT1, PRKAG2, CDC42BPB, GNAI2, CRKL, CD209, TOLLIP, MKNK2, DEPDC1, SIK2, SH2B3, JAK1	315	403	16792	1.85189	1	0.72812	0.718121
GOTERM_BP_DIRECT	GO:0032526~response to retinoic acid	4	1.18343	0.0409512	SREBF1, DUSP1, PPARG, IGF2R	315	41	16792	5.20077	1	0.72812	0.718121
GOTERM_BP_DIRECT	GO:0042593~glucose homeostasis	6	1.77515	0.0410661	GPI, CRTC2, INSR, PPARG, PCK1, HIF1A	315	101	16792	3.16681	1	0.72812	0.718121
GOTERM_BP_DIRECT	GO:0071300~cellular response to retinoic acid	5	1.47929	0.0420302	MEF2C, CYP26B1, TWF2, PPARG, PCK1	315	70	16792	3.80771	1	0.738789	0.728644
GOTERM_BP_DIRECT	GO:0001541~ovarian follicle development	4	1.18343	0.0435108	CEBPB, BAX, BCL2L1, VEGFA	315	42	16792	5.07695	1	0.746098	0.735852
GOTERM_BP_DIRECT	GO:0007595~lactation	4	1.18343	0.0435108	UPRT, ATP7A, HIF1A, VEGFA	315	42	16792	5.07695	1	0.746098	0.735852
GOTERM_BP_DIRECT	GO:0006970~response to osmotic stress	3	0.887574	0.0437899	ATF2, SLC2A1, EGFR	315	18	16792	8.88466	1	0.746098	0.735852
GOTERM_BP_DIRECT	GO:0000226~microtubule cytoskeleton organization	5	1.47929	0.0439096	WEE1, CNP, MAP1B, MAP7D1, PHLDB2	315	71	16792	3.75408	1	0.746098	0.735852
GOTERM_BP_DIRECT	GO:0007165~signal transduction	31	9.1716	0.0450081	CD274, SDC4, PXN, FAM13A, CREM, IRS2, HIF1A, EGFR, GNAI2, NAMPT, HIVEP1, TP53BP2, HIVEP2, MAPK6, SH2B3, MPP1, HSP90AA1, FGFBP1, MYO10, GDF15, ARRDC2, ARRDC3, CDC42BPB, IGF2R, CXCL11, TOLLIP, DLC1, DEPDC1, PPARG, OPTN, NECTIN2	315	1161	16792	1.42338	1	0.758443	0.748028
GOTERM_BP_DIRECT	GO:0043525~positive regulation of neuron apoptotic process	4	1.18343	0.0461483	ATF2, JUN, DDIT3, BAX	315	43	16792	4.95888	1	0.771283	0.760691
GOTERM_BP_DIRECT	GO:0001764~neuron migration	6	1.77515	0.0471959	MEF2C, HSP90AA1, UNK, SRF, DDIT4, BAX	315	105	16792	3.04617	1	0.776067	0.76541
GOTERM_BP_DIRECT	GO:0006464~cellular protein modification process	6	1.77515	0.0471959	ERO1A, TGM1, UEVLD, PLOD1, RABGGTB, RIMKLA	315	105	16792	3.04617	1	0.776067	0.76541
GOTERM_BP_DIRECT	GO:0009791~post-embryonic development	5	1.47929	0.0478081	SGPL1, TIPARP, INPPL1, ACO1, IGF2R	315	73	16792	3.65123	1	0.776273	0.765613
GOTERM_BP_DIRECT	GO:0046716~muscle cell cellular homeostasis	3	0.887574	0.0483505	SRF, ALDOA, HIF1A	315	19	16792	8.41704	1	0.776273	0.765613
GOTERM_BP_DIRECT	GO:0070584~mitochondrion morphogenesis	3	0.887574	0.0483505	BAX, MFF, BCL2L1	315	19	16792	8.41704	1	0.776273	0.765613
GOTERM_BP_DIRECT	GO:0006879~cellular iron ion homeostasis	4	1.18343	0.0488632	EGLN1, ACO1, HIF1A, HMOX2	315	44	16792	4.84618	1	0.778376	0.767687
GOTERM_BP_DIRECT	GO:0007584~response to nutrient	5	1.47929	0.0498269	LDHA, PKM, PPARG, AACS, GNAI2	315	74	16792	3.60189	1	0.787575	0.77676
GOTERM_BP_DIRECT	GO:0032870~cellular response to hormone stimulus	4	1.18343	0.0516546	JUN, JUND, DUSP1, SIK2	315	45	16792	4.73848	1	0.795549	0.784624
GOTERM_BP_DIRECT	GO:0006687~glycosphingolipid metabolic process	4	1.18343	0.0516546	UGCG, CPTP, CREM, BAX	315	45	16792	4.73848	1	0.795549	0.784624
GOTERM_BP_DIRECT	GO:0030968~endoplasmic reticulum unfolded protein response	4	1.18343	0.0516546	ERO1A, CREB3L3, HSPA5, EIF2AK3	315	45	16792	4.73848	1	0.795549	0.784624
GOTERM_BP_DIRECT	GO:0034976~response to endoplasmic reticulum stress	5	1.47929	0.0518921	ERO1A, PPP2CB, CEBPB, DDIT3, EIF2AK3	315	75	16792	3.55386	1	0.795549	0.784624
GOTERM_BP_DIRECT	GO:1902895~positive regulation of pri-miRNA transcription from RNA polymerase II promoter	3	0.887574	0.0530748	JUN, SRF, HIF1A	315	20	16792	7.99619	1	0.807609	0.796518
GOTERM_BP_DIRECT	GO:0060021~palate development	5	1.47929	0.0540034	MEF2C, SGPL1, TIPARP, BCOR, TBX2	315	76	16792	3.5071	1	0.815651	0.804451
GOTERM_BP_DIRECT	GO:0034140~negative regulation of toll-like receptor 3 signaling pathway	2	0.591716	0.0550589	F2RL1, TNFAIP3	315	3	16792	35.5386	1	0.819453	0.8082
GOTERM_BP_DIRECT	GO:0010871~negative regulation of receptor biosynthetic process	2	0.591716	0.0550589	PPARG, NR1D1	315	3	16792	35.5386	1	0.819453	0.8082
GOTERM_BP_DIRECT	GO:0006979~response to oxidative stress	6	1.77515	0.0555817	PDLIM1, SLC23A2, BTG1, DUSP1, EGFR, HMOX2	315	110	16792	2.90771	1	0.82124	0.809963
GOTERM_BP_DIRECT	GO:0008630~intrinsic apoptotic signaling pathway in response to DNA damage	4	1.18343	0.0574631	BAX, FNIP2, BCL2L1, MCL1	315	47	16792	4.53685	1	0.832893	0.821456
GOTERM_BP_DIRECT	GO:0070932~histone H3 deacetylation	3	0.887574	0.0579553	PER2, PER1, HDAC5	315	21	16792	7.61542	1	0.832893	0.821456
GOTERM_BP_DIRECT	GO:0045663~positive regulation of myoblast differentiation	3	0.887574	0.0579553	MEF2C, BTG1, HIF1AN	315	21	16792	7.61542	1	0.832893	0.821456
GOTERM_BP_DIRECT	GO:0008286~insulin receptor signaling pathway	5	1.47929	0.0583638	SREBF1, INSR, NAMPT, IRS2, FOXO1	315	78	16792	3.41718	1	0.832893	0.821456
GOTERM_BP_DIRECT	GO:0010628~positive regulation of gene expression	10	2.95858	0.0584128	CNN2, MEF2C, CYP26B1, NFIL3, CITED2, MDM2, EIF2AK3, HIF1A, LIMS1, VEGFA	315	262	16792	2.03465	1	0.832893	0.821456
GOTERM_BP_DIRECT	GO:0071222~cellular response to lipopolysaccharide	6	1.77515	0.0610001	HDAC5, MEF2C, CEBPB, NOS2, TNFAIP3, NR1D1	315	113	16792	2.83051	1	0.863744	0.851883
GOTERM_BP_DIRECT	GO:2001243~negative regulation of intrinsic apoptotic signaling pathway	3	0.887574	0.0629845	IVNS1ABP, BCL2L1, MCL1	315	22	16792	7.26926	1	0.879626	0.867547
GOTERM_BP_DIRECT	GO:0045736~negative regulation of cyclin-dependent protein serine/threonine kinase activity	3	0.887574	0.0629845	HHEX, CDKN1B, TNFAIP3	315	22	16792	7.26926	1	0.879626	0.867547
GOTERM_BP_DIRECT	GO:0021762~substantia nigra development	4	1.18343	0.0635663	LDHA, CNP, HSPA5, ACTB	315	49	16792	4.35167	1	0.881712	0.869604
GOTERM_BP_DIRECT	GO:0043410~positive regulation of MAPK cascade	5	1.47929	0.0652461	TNFRSF6B, KSR1, INSR, KDR, TNFRSF14	315	81	16792	3.29061	1	0.898897	0.886553
GOTERM_BP_DIRECT	GO:0016239~positive regulation of macroautophagy	3	0.887574	0.0681551	BNIP3L, KDR, HIF1A	315	23	16792	6.95321	1	0.918929	0.90631
GOTERM_BP_DIRECT	GO:0033137~negative regulation of peptidyl-serine phosphorylation	3	0.887574	0.0681551	HGF, DDIT4, BAX	315	23	16792	6.95321	1	0.918929	0.90631
GOTERM_BP_DIRECT	GO:0042542~response to hydrogen peroxide	4	1.18343	0.0699559	PPP2CB, LDHA, JUN, DUSP1	315	51	16792	4.18101	1	0.918929	0.90631
GOTERM_BP_DIRECT	GO:0071277~cellular response to calcium ion	4	1.18343	0.0699559	MEF2C, JUN, EEF2K, JUND	315	51	16792	4.18101	1	0.918929	0.90631
GOTERM_BP_DIRECT	GO:0001922~B-1 B cell homeostasis	2	0.591716	0.0727319	TNFAIP3, HIF1A	315	4	16792	26.654	1	0.918929	0.90631
GOTERM_BP_DIRECT	GO:1903553~positive regulation of extracellular exosome assembly	2	0.591716	0.0727319	PDCD6IP, SDC4	315	4	16792	26.654	1	0.918929	0.90631
GOTERM_BP_DIRECT	GO:0002741~positive regulation of cytokine secretion involved in immune response	2	0.591716	0.0727319	F2RL1, TNFRSF14	315	4	16792	26.654	1	0.918929	0.90631
GOTERM_BP_DIRECT	GO:1900015~regulation of cytokine production involved in inflammatory response	2	0.591716	0.0727319	PER1, NOS2	315	4	16792	26.654	1	0.918929	0.90631
GOTERM_BP_DIRECT	GO:0072606~interleukin-8 secretion	2	0.591716	0.0727319	RAB1A, NOS2	315	4	16792	26.654	1	0.918929	0.90631
GOTERM_BP_DIRECT	GO:0097167~circadian regulation of translation	2	0.591716	0.0727319	PER2, PER1	315	4	16792	26.654	1	0.918929	0.90631
GOTERM_BP_DIRECT	GO:0061428~negative regulation of transcription from RNA polymerase II promoter in response to hypoxia	2	0.591716	0.0727319	CITED2, HIF1AN	315	4	16792	26.654	1	0.918929	0.90631
GOTERM_BP_DIRECT	GO:0061419~positive regulation of transcription from RNA polymerase II promoter in response to hypoxia	2	0.591716	0.0727319	HIF1A, VEGFA	315	4	16792	26.654	1	0.918929	0.90631
GOTERM_BP_DIRECT	GO:0070232~regulation of T cell apoptotic process	2	0.591716	0.0727319	CD274, GIMAP8	315	4	16792	26.654	1	0.918929	0.90631
GOTERM_BP_DIRECT	GO:0071333~cellular response to glucose stimulus	4	1.18343	0.0732553	MEF2C, SRF, IRS2, AACS	315	52	16792	4.10061	1	0.918929	0.90631
GOTERM_BP_DIRECT	GO:0090314~positive regulation of protein targeting to membrane	3	0.887574	0.0734602	CEMIP, MIEF1, MFF	315	24	16792	6.66349	1	0.918929	0.90631
GOTERM_BP_DIRECT	GO:0009636~response to toxic substance	5	1.47929	0.0750496	CNP, SRF, MDM2, BAX, AHR	315	85	16792	3.13576	1	0.933087	0.920273
GOTERM_BP_DIRECT	GO:0000188~inactivation of MAPK activity	3	0.887574	0.078893	DUSP1, DUSP8, DUSP16	315	25	16792	6.39695	1	0.969053	0.955746
GOTERM_BP_DIRECT	GO:0060612~adipose tissue development	3	0.887574	0.078893	ATF2, NAMPT, AACS	315	25	16792	6.39695	1	0.969053	0.955746
GOTERM_BP_DIRECT	GO:1901796~regulation of signal transduction by p53 class mediator	6	1.77515	0.0833272	DYRK2, TP53INP1, MDM2, TP53BP2, PRKAG2, HIPK1	315	124	16792	2.57942	1	1	0.986752
GOTERM_BP_DIRECT	GO:0019216~regulation of lipid metabolic process	3	0.887574	0.0844468	IRS2, NR1D2, NR1D1	315	26	16792	6.15092	1	1	0.986752
GOTERM_BP_DIRECT	GO:0006470~protein dephosphorylation	6	1.77515	0.0877949	PTPRD, PPP2CB, PPP1R3C, PPM1K, MTMR4, PPM1D	315	126	16792	2.53847	1	1	0.986752
GOTERM_BP_DIRECT	GO:0070389~chaperone cofactor-dependent protein refolding	2	0.591716	0.0900753	DNAJB1, DNAJC7	315	5	16792	21.3232	1	1	0.986752
GOTERM_BP_DIRECT	GO:0045040~protein import into mitochondrial outer membrane	2	0.591716	0.0900753	HSP90AA1, HSPA4	315	5	16792	21.3232	1	1	0.986752
GOTERM_BP_DIRECT	GO:0061734~parkin-mediated mitophagy in response to mitochondrial depolarization	2	0.591716	0.0900753	MFN2, OPTN	315	5	16792	21.3232	1	1	0.986752
GOTERM_BP_DIRECT	GO:0002634~regulation of germinal center formation	2	0.591716	0.0900753	MEF2C, TNFAIP3	315	5	16792	21.3232	1	1	0.986752
GOTERM_BP_DIRECT	GO:0006089~lactate metabolic process	2	0.591716	0.0900753	LDHA, HIF1A	315	5	16792	21.3232	1	1	0.986752
GOTERM_BP_DIRECT	GO:0019217~regulation of fatty acid metabolic process	2	0.591716	0.0900753	SREBF1, PRKAG2	315	5	16792	21.3232	1	1	0.986752
GOTERM_BP_DIRECT	GO:0060850~regulation of transcription involved in cell fate commitment	2	0.591716	0.0900753	CEBPB, PPARG	315	5	16792	21.3232	1	1	0.986752
GOTERM_BP_DIRECT	GO:0045661~regulation of myoblast differentiation	2	0.591716	0.0900753	FLOT2, ZFP36L1	315	5	16792	21.3232	1	1	0.986752
GOTERM_BP_DIRECT	GO:0042634~regulation of hair cycle	2	0.591716	0.0900753	FA2H, PER1	315	5	16792	21.3232	1	1	0.986752
GOTERM_BP_DIRECT	GO:0038033~positive regulation of endothelial cell chemotaxis by VEGF-activated vascular endothelial growth factor receptor signaling pathway	2	0.591716	0.0900753	KDR, VEGFA	315	5	16792	21.3232	1	1	0.986752
GOTERM_BP_DIRECT	GO:0051281~positive regulation of release of sequestered calcium ion into cytosol	3	0.887574	0.0901153	CXCL11, CEMIP, BAX	315	27	16792	5.9231	1	1	0.986752
GOTERM_BP_DIRECT	GO:0030154~cell differentiation	14	4.14201	0.0947251	GPSM1, CITED2, BHLHE41, CREM, FOXK1, NR1D1, FOXN3, ZHX1, GADD45G, HHEX, ERF, ANGPTL4, SH2B3, JAK1	315	462	16792	1.61539	1	1	0.986752
GOTERM_BP_DIRECT	GO:0009314~response to radiation	3	0.887574	0.0958922	JUN, JUND, PPM1D	315	28	16792	5.71156	1	1	0.986752
GOTERM_BP_DIRECT	GO:0051881~regulation of mitochondrial membrane potential	3	0.887574	0.0958922	BAX, SLC25A36, BCL2L1	315	28	16792	5.71156	1	1	0.986752
GOTERM_BP_DIRECT	GO:2000352~negative regulation of endothelial cell apoptotic process	3	0.887574	0.0958922	KDR, TNFAIP3, ANGPTL4	315	28	16792	5.71156	1	1	0.986752
GOTERM_BP_DIRECT	GO:0009612~response to mechanical stimulus	4	1.18343	0.0981935	JUN, JUND, CITED2, PPARG	315	59	16792	3.6141	1	1	0.986752
GOTERM_BP_DIRECT	GO:0071407~cellular response to organic cyclic compound	4	1.18343	0.0981935	NFKBIA, CEBPB, CDKN1B, TIPARP	315	59	16792	3.6141	1	1	0.986752

## Sheet: Intestine up GO BP
Category	GO ID and Term Description	Count	%	p-value	Genes	List Total	Pop Hits	Pop Total	Fold Enrichment	Bonferroni	Benjamini	FDR
GOTERM_BP_DIRECT	GO:0001666~response to hypoxia	12	5.85366	4.923e-06	EGLN1, SMAD4, EGLN3, CDKN1B, EGLN2, CITED2, BNIP3, DDIT4, ANGPTL4, HIF1A, SLC2A8, VEGFA	194	172	16792	6.03884	0.00734266	0.00565004	0.0055972
GOTERM_BP_DIRECT	GO:0008203~cholesterol metabolic process	8	3.90244	1.27402e-05	ABCA1, APP, RXRA, INSIG2, APOA1, APOE, CYP7B1, NR0B2	194	68	16792	10.1831	0.0188915	0.00565004	0.0055972
GOTERM_BP_DIRECT	GO:0071456~cellular response to hypoxia	9	4.39024	1.47245e-05	ERO1A, BNIP3L, RGCC, BNIP3, MDM2, PCK1, FOXO3, HIF1A, VEGFA	194	96	16792	8.11469	0.0218016	0.00565004	0.0055972
GOTERM_BP_DIRECT	GO:0061418~regulation of transcription from RNA polymerase II promoter in response to hypoxia	6	2.92683	1.5097e-05	EGLN1, EGLN3, EGLN2, HIF1AN, HIF1A, VEGFA	194	28	16792	18.5479	0.0223469	0.00565004	0.0055972
GOTERM_BP_DIRECT	GO:0055114~oxidation-reduction process	20	9.7561	5.42615e-05	ERO1A, EGLN1, EGLN3, STEAP4, EGLN2, NCF2, MICAL3, CPOX, CYP7B1, ADO, JMJD6, C15ORF48, CYP26A1, BDH1, SCD, FTH1, HIF1AN, BCO1, XDH, KDM7A	194	592	16792	2.92421	0.0780199	0.0162459	0.016094
GOTERM_BP_DIRECT	GO:0016239~positive regulation of macroautophagy	5	2.43902	0.000126227	BNIP3L, RAB12, BNIP3, ULK1, HIF1A	194	23	16792	18.8167	0.172191	0.0307383	0.0304509
GOTERM_BP_DIRECT	GO:0006094~gluconeogenesis	6	2.92683	0.000143733	ALDOC, PCK1, ALDOA, ATF3, PGM1, PCK2	194	44	16792	11.8032	0.193607	0.0307383	0.0304509
GOTERM_BP_DIRECT	GO:0061621~canonical glycolysis	5	2.43902	0.000207442	PFKFB4, PFKL, ALDOC, ALDOA, PFKP	194	26	16792	16.6455	0.266973	0.0384574	0.0380977
GOTERM_BP_DIRECT	GO:0000122~negative regulation of transcription from RNA polymerase II promoter	21	10.2439	0.000242853	ATF2, SMAD4, CITED2, FOXO3, NR0B2, ESR2, VEGFA, EFNA1, MNT, RXRA, NFIL3, DDIT3, NRIP1, MDM2, NUPR2, PPARG, MXD1, FNIP2, JUNB, RREB1, ATF3	194	720	16792	2.52457	0.304827	0.0384574	0.0380977
GOTERM_BP_DIRECT	GO:0032869~cellular response to insulin stimulus	7	3.41463	0.000256896	ERRFI1, EEF2K, INSR, IRS2, PPARG, PCK1, LPIN1	194	77	16792	7.86879	0.319293	0.0384574	0.0380977
GOTERM_BP_DIRECT	GO:0045893~positive regulation of transcription, DNA-templated	17	8.29268	0.000308305	KMT2E, SMAD4, CITED2, INSR, NCOA4, AXIN1, NR1D2, FOXN3, FOXO3, HIF1A, ESR2, DDIT3, TP53INP1, NRIP1, PPARG, RREB1, KDM7A	194	515	16792	2.85721	0.369728	0.0419575	0.0415651
GOTERM_BP_DIRECT	GO:0006096~glycolytic process	5	2.43902	0.000598946	PFKL, OGDH, ALDOC, ALDOA, PGM1	194	34	16792	12.7289	0.592164	0.0717573	0.0710862
GOTERM_BP_DIRECT	GO:0045732~positive regulation of protein catabolic process	6	2.92683	0.000623143	MYLIP, CDKN1B, EGLN2, TIPARP, NEDD4, AXIN1	194	60	16792	8.65567	0.606682	0.0717573	0.0710862
GOTERM_BP_DIRECT	GO:0045944~positive regulation of transcription from RNA polymerase II promoter	24	11.7073	0.000908424	EGLN1, ATF2, CSRNP1, APP, SMAD4, KLF13, CITED2, ASH1L, FOXO3, HIF1A, VEGFA, RXRA, TFDP1, RGCC, TEF, DDIT3, NRIP1, F2RL1, ALX4, NCOA7, PPARG, LPIN1, JUNB, ATF3	194	981	16792	2.1176	0.743475	0.0971365	0.0962281
GOTERM_BP_DIRECT	GO:0032489~regulation of Cdc42 protein signal transduction	3	1.46341	0.00128461	ABCA1, APOA1, APOE	194	5	16792	51.934	0.854021	0.120191	0.119067
GOTERM_BP_DIRECT	GO:0018401~peptidyl-proline hydroxylation to 4-hydroxy-L-proline	3	1.46341	0.00128461	EGLN1, EGLN3, EGLN2	194	5	16792	51.934	0.854021	0.120191	0.119067
GOTERM_BP_DIRECT	GO:0032147~activation of protein kinase activity	5	2.43902	0.00174408	RGCC, INSR, AXIN1, MARK2, VEGFA	194	45	16792	9.61741	0.926698	0.153582	0.152146
GOTERM_BP_DIRECT	GO:0003151~outflow tract morphogenesis	5	2.43902	0.00189323	ATF2, CITED2, NEDD4, HIF1A, VEGFA	194	46	16792	9.40834	0.94139	0.157453	0.155981
GOTERM_BP_DIRECT	GO:0030388~fructose 1,6-bisphosphate metabolic process	3	1.46341	0.00265704	PFKL, ALDOC, ALDOA	194	7	16792	37.0957	0.981368	0.189409	0.187638
GOTERM_BP_DIRECT	GO:0048102~autophagic cell death	3	1.46341	0.00265704	CDKN1B, BNIP3, TP53INP1	194	7	16792	37.0957	0.981368	0.189409	0.187638
GOTERM_BP_DIRECT	GO:0035357~peroxisome proliferator activated receptor signaling pathway	3	1.46341	0.00265704	RXRA, PDK3, PPARG	194	7	16792	37.0957	0.981368	0.189409	0.187638
GOTERM_BP_DIRECT	GO:0019433~triglyceride catabolic process	4	1.95122	0.00285368	DDHD2, APOA1, APOE, PNPLA2	194	25	16792	13.8491	0.98613	0.193792	0.19198
GOTERM_BP_DIRECT	GO:0071333~cellular response to glucose stimulus	5	2.43902	0.00297743	PDK3, IRS2, FOXO3, AACS, PCK2	194	52	16792	8.32276	0.988482	0.193792	0.19198
GOTERM_BP_DIRECT	GO:0031102~neuron projection regeneration	3	1.46341	0.00351598	APOA1, ULK1, APOE	194	8	16792	32.4588	0.99487	0.210537	0.208568
GOTERM_BP_DIRECT	GO:0034380~high-density lipoprotein particle assembly	3	1.46341	0.00351598	ABCA1, APOA1, APOE	194	8	16792	32.4588	0.99487	0.210537	0.208568
GOTERM_BP_DIRECT	GO:0001570~vasculogenesis	5	2.43902	0.00389834	CITED2, TIPARP, HEG1, JUNB, VEGFA	194	56	16792	7.72828	0.997112	0.224454	0.222355
GOTERM_BP_DIRECT	GO:0006000~fructose metabolic process	3	1.46341	0.0055658	PFKFB4, ALDOC, ALDOA	194	10	16792	25.967	0.999765	0.308593	0.305707
GOTERM_BP_DIRECT	GO:0042593~glucose homeostasis	6	2.92683	0.00619614	INSR, PPARG, PCK1, HIF1A, PDK2, SIDT2	194	101	16792	5.14198	0.999909	0.320012	0.317019
GOTERM_BP_DIRECT	GO:0008285~negative regulation of cell proliferation	12	5.85366	0.00619929	BTG3, SMAD4, MNT, CDKN1B, KLF13, BTG1, RGCC, SERPINE2, FTH1, TP53INP1, NUPR2, TOB1	194	396	16792	2.62293	0.999909	0.320012	0.317019
GOTERM_BP_DIRECT	GO:0006366~transcription from RNA polymerase II promoter	14	6.82927	0.0064732	ATF2, CSRNP1, SMAD4, KLF13, ASH1L, FOXO3, HIF1A, MNT, TEF, NFIL3, ALX4, JUNB, RREB1, ATF3	194	513	16792	2.36217	0.99994	0.323013	0.319992
GOTERM_BP_DIRECT	GO:0006006~glucose metabolic process	5	2.43902	0.00737945	PDK3, IRS2, PCK1, PGM1, PDK2	194	67	16792	6.45946	0.999985	0.349277	0.346011
GOTERM_BP_DIRECT	GO:0042594~response to starvation	4	1.95122	0.00746618	DDIT3, ULK1, PPARG, AACS	194	35	16792	9.89219	0.999987	0.349277	0.346011
GOTERM_BP_DIRECT	GO:0009749~response to glucose	5	2.43902	0.00777163	PFKL, CDKN1B, IRS2, NR0B2, SIDT2	194	68	16792	6.36446	0.999992	0.352549	0.349252
GOTERM_BP_DIRECT	GO:0071300~cellular response to retinoic acid	5	2.43902	0.00859656	KMT2E, ABCA1, TWF2, PPARG, PCK1	194	70	16792	6.18262	0.999998	0.378502	0.374962
GOTERM_BP_DIRECT	GO:0055088~lipid homeostasis	4	1.95122	0.0100821	IRS2, NR1D2, PPARG, PNPLA2	194	39	16792	8.87761	1	0.431225	0.427192
GOTERM_BP_DIRECT	GO:0033700~phospholipid efflux	3	1.46341	0.0109206	ABCA1, APOA1, APOE	194	14	16792	18.5479	1	0.454116	0.449869
GOTERM_BP_DIRECT	GO:0060021~palate development	5	2.43902	0.0114085	CSRNP1, SMAD4, INSIG2, TIPARP, ALX4	194	76	16792	5.69452	1	0.455608	0.451347
GOTERM_BP_DIRECT	GO:0032024~positive regulation of insulin secretion	4	1.95122	0.0115652	IRS2, NR0B2, AACS, PCK2	194	41	16792	8.44456	1	0.455608	0.451347
GOTERM_BP_DIRECT	GO:0051496~positive regulation of stress fiber assembly	4	1.95122	0.0123513	RGCC, SDC4, APOA1, ARHGEF5	194	42	16792	8.2435	1	0.468045	0.463668
GOTERM_BP_DIRECT	GO:0090141~positive regulation of mitochondrial fission	3	1.46341	0.0125062	BNIP3, DDHD2, MIEF1	194	15	16792	17.3113	1	0.468045	0.463668
GOTERM_BP_DIRECT	GO:0030308~negative regulation of cell growth	6	2.92683	0.0129558	SMAD4, CDKN1B, BTG1, SERPINE2, PPARG, ESR2	194	121	16792	4.29207	1	0.473045	0.468621
GOTERM_BP_DIRECT	GO:0006879~cellular iron ion homeostasis	4	1.95122	0.0140135	EGLN1, SMAD4, FTH1, HIF1A	194	44	16792	7.86879	1	0.499481	0.49481
GOTERM_BP_DIRECT	GO:0006919~activation of cysteine-type endopeptidase activity involved in apoptotic process	5	2.43902	0.0153642	ACER2, EGLN3, CDKN1B, PPARG, XDH	194	83	16792	5.21426	1	0.534889	0.529886
GOTERM_BP_DIRECT	GO:0031100~organ regeneration	4	1.95122	0.0167338	APOA1, PPARG, LPIN1, NR0B2	194	47	16792	7.36653	1	0.569331	0.564006
GOTERM_BP_DIRECT	GO:0006970~response to osmotic stress	3	1.46341	0.0178171	ATF2, TSC22D2, SLC2A1	194	18	16792	14.4261	1	0.579831	0.574409
GOTERM_BP_DIRECT	GO:0043691~reverse cholesterol transport	3	1.46341	0.0178171	ABCA1, APOA1, APOE	194	18	16792	14.4261	1	0.579831	0.574409
GOTERM_BP_DIRECT	GO:0042127~regulation of cell proliferation	7	3.41463	0.0203159	NUAK1, EGLN3, CDKN1B, SRMS, TNFRSF14, MELTF, JUNB	194	185	16792	3.27512	1	0.647084	0.641033
GOTERM_BP_DIRECT	GO:0048669~collateral sprouting in absence of injury	2	0.97561	0.0228557	APP, COBL	194	2	16792	86.5567	1	0.712812	0.706146
GOTERM_BP_DIRECT	GO:0048511~rhythmic process	4	1.95122	0.0241525	TEF, CIPC, NR1D2, PPARG	194	54	16792	6.41161	1	0.737882	0.730982
GOTERM_BP_DIRECT	GO:0043401~steroid hormone mediated signaling pathway	4	1.95122	0.0277926	RXRA, NR1D2, PPARG, NR0B2	194	57	16792	6.07415	1	0.832111	0.824329
GOTERM_BP_DIRECT	GO:0019915~lipid storage	3	1.46341	0.0307297	NRIP1, APOA1, PNPLA2	194	24	16792	10.8196	1	0.874614	0.866435
GOTERM_BP_DIRECT	GO:0051091~positive regulation of sequence-specific DNA binding transcription factor activity	5	2.43902	0.0329698	ATF2, RGCC, PPARG, ARHGEF5, ESR2	194	105	16792	4.12175	1	0.874614	0.866435
GOTERM_BP_DIRECT	GO:0001523~retinoid metabolic process	4	1.95122	0.0330742	SDC4, APOA1, APOE, BCO1	194	61	16792	5.67585	1	0.874614	0.866435
GOTERM_BP_DIRECT	GO:0033344~cholesterol efflux	3	1.46341	0.0331538	ABCA1, APOA1, APOE	194	25	16792	10.3868	1	0.874614	0.866435
GOTERM_BP_DIRECT	GO:0006974~cellular response to DNA damage stimulus	7	3.41463	0.0332586	VAV3, ATF2, NUAK1, EGLN3, DDIT3, DDX11, NUPR2	194	208	16792	2.91297	1	0.874614	0.866435
GOTERM_BP_DIRECT	GO:0097286~iron ion import	2	0.97561	0.0340879	FTH1, MELTF	194	3	16792	57.7045	1	0.874614	0.866435
GOTERM_BP_DIRECT	GO:1990785~response to water-immersion restraint stress	2	0.97561	0.0340879	MDM2, FOXO3	194	3	16792	57.7045	1	0.874614	0.866435
GOTERM_BP_DIRECT	GO:0055098~response to low-density lipoprotein particle	2	0.97561	0.0340879	ABCA1, PPARG	194	3	16792	57.7045	1	0.874614	0.866435
GOTERM_BP_DIRECT	GO:0006977~DNA damage response, signal transduction by p53 class mediator resulting in cell cycle arrest	4	1.95122	0.0344704	CDKN1B, TFDP1, RGCC, MDM2	194	62	16792	5.5843	1	0.874614	0.866435
GOTERM_BP_DIRECT	GO:0070328~triglyceride homeostasis	3	1.46341	0.03565	APOA1, ANGPTL4, APOE	194	26	16792	9.98731	1	0.889467	0.881149
GOTERM_BP_DIRECT	GO:0042632~cholesterol homeostasis	4	1.95122	0.0373534	ABCA1, MYLIP, APOA1, APOE	194	64	16792	5.40979	1	0.916688	0.908115
GOTERM_BP_DIRECT	GO:0045931~positive regulation of mitotic cell cycle	3	1.46341	0.0408514	APP, SPHK1, MDM2	194	28	16792	9.27393	1	0.93961	0.930823
GOTERM_BP_DIRECT	GO:0060412~ventricular septum morphogenesis	3	1.46341	0.0435527	EGLN1, SMAD4, CITED2	194	29	16792	8.95414	1	0.93961	0.930823
GOTERM_BP_DIRECT	GO:0001937~negative regulation of endothelial cell proliferation	3	1.46341	0.0435527	RGCC, APOE, XDH	194	29	16792	8.95414	1	0.93961	0.930823
GOTERM_BP_DIRECT	GO:0045766~positive regulation of angiogenesis	5	2.43902	0.0437142	BTG1, SPHK1, ANGPTL4, HIF1A, VEGFA	194	115	16792	3.76333	1	0.93961	0.930823
GOTERM_BP_DIRECT	GO:0061428~negative regulation of transcription from RNA polymerase II promoter in response to hypoxia	2	0.97561	0.0451917	CITED2, HIF1AN	194	4	16792	43.2784	1	0.93961	0.930823
GOTERM_BP_DIRECT	GO:0010766~negative regulation of sodium ion transport	2	0.97561	0.0451917	SERPINE2, NEDD4	194	4	16792	43.2784	1	0.93961	0.930823
GOTERM_BP_DIRECT	GO:0002741~positive regulation of cytokine secretion involved in immune response	2	0.97561	0.0451917	F2RL1, TNFRSF14	194	4	16792	43.2784	1	0.93961	0.930823
GOTERM_BP_DIRECT	GO:0032909~regulation of transforming growth factor beta2 production	2	0.97561	0.0451917	SMAD4, HIF1A	194	4	16792	43.2784	1	0.93961	0.930823
GOTERM_BP_DIRECT	GO:0097411~hypoxia-inducible factor-1alpha signaling pathway	2	0.97561	0.0451917	PDK3, HIF1A	194	4	16792	43.2784	1	0.93961	0.930823
GOTERM_BP_DIRECT	GO:0061419~positive regulation of transcription from RNA polymerase II promoter in response to hypoxia	2	0.97561	0.0451917	HIF1A, VEGFA	194	4	16792	43.2784	1	0.93961	0.930823
GOTERM_BP_DIRECT	GO:0035694~mitochondrial protein catabolic process	2	0.97561	0.0451917	BNIP3L, BNIP3	194	4	16792	43.2784	1	0.93961	0.930823
GOTERM_BP_DIRECT	GO:0046777~protein autophosphorylation	6	2.92683	0.0489788	EEF2K, INSR, MKNK2, ULK1, SIK2, MARK2	194	172	16792	3.01942	1	0.994237	0.984939
GOTERM_BP_DIRECT	GO:1990090~cellular response to nerve growth factor stimulus	3	1.46341	0.0491473	APP, MICALL1, FOXO3	194	31	16792	8.37645	1	0.994237	0.984939
GOTERM_BP_DIRECT	GO:0009791~post-embryonic development	4	1.95122	0.0517889	CSRNP1, TIPARP, HEG1, ALX4	194	73	16792	4.74283	1	1	0.99131
GOTERM_BP_DIRECT	GO:0007584~response to nutrient	4	1.95122	0.0535372	ABCA1, APOA1, PPARG, AACS	194	74	16792	4.67874	1	1	0.99131
GOTERM_BP_DIRECT	GO:0010891~negative regulation of sequestering of triglyceride	2	0.97561	0.0561685	PPARG, PNPLA2	194	5	16792	34.6227	1	1	0.99131
GOTERM_BP_DIRECT	GO:0097192~extrinsic apoptotic signaling pathway in absence of ligand	3	1.46341	0.0579923	MKNK2, FOXO3, MCL1	194	34	16792	7.63736	1	1	0.99131
GOTERM_BP_DIRECT	GO:0045454~cell redox homeostasis	4	1.95122	0.0589499	ERO1A, EGLN2, NCF2, DDIT3	194	77	16792	4.49645	1	1	0.99131
GOTERM_BP_DIRECT	GO:0008286~insulin receptor signaling pathway	4	1.95122	0.0608094	INSR, IRS2, PDK2, SLC2A8	194	78	16792	4.43881	1	1	0.99131
GOTERM_BP_DIRECT	GO:0007507~heart development	6	2.92683	0.060818	GYS1, CITED2, HEG1, ECE1, PPARG, JMJD6	194	183	16792	2.83792	1	1	0.99131
GOTERM_BP_DIRECT	GO:0000422~mitophagy	3	1.46341	0.0610544	GABARAPL1, BNIP3, MARK2	194	35	16792	7.41915	1	1	0.99131
GOTERM_BP_DIRECT	GO:0042493~response to drug	8	3.90244	0.0618463	ABCA1, VAV3, CDKN1B, MDM2, APOA1, PPARG, JUNB, AACS	194	304	16792	2.27781	1	1	0.99131
GOTERM_BP_DIRECT	GO:0030335~positive regulation of cell migration	6	2.92683	0.0619413	SPAG9, INSR, SPHK1, F2RL1, IRS2, VEGFA	194	184	16792	2.8225	1	1	0.99131
GOTERM_BP_DIRECT	GO:0045892~negative regulation of transcription, DNA-templated	11	5.36585	0.0628595	SMAD4, CDKN1B, CITED2, CIPC, DDIT3, MDM2, ZBTB21, NR1D2, PPARG, FOXN3, CIART	194	499	16792	1.90806	1	1	0.99131
GOTERM_BP_DIRECT	GO:0010887~negative regulation of cholesterol storage	2	0.97561	0.0670197	ABCA1, PPARG	194	6	16792	28.8522	1	1	0.99131
GOTERM_BP_DIRECT	GO:0060136~embryonic process involved in female pregnancy	2	0.97561	0.0670197	CITED2, JUNB	194	6	16792	28.8522	1	1	0.99131
GOTERM_BP_DIRECT	GO:1903715~regulation of aerobic respiration	2	0.97561	0.0670197	BNIP3, HIF1A	194	6	16792	28.8522	1	1	0.99131
GOTERM_BP_DIRECT	GO:0032364~oxygen homeostasis	2	0.97561	0.0670197	EGLN1, HIF1A	194	6	16792	28.8522	1	1	0.99131
GOTERM_BP_DIRECT	GO:0034384~high-density lipoprotein particle clearance	2	0.97561	0.0670197	APOA1, APOE	194	6	16792	28.8522	1	1	0.99131
GOTERM_BP_DIRECT	GO:0006357~regulation of transcription from RNA polymerase II promoter	10	4.87805	0.0680939	ATF2, ZNF395, TFDP1, TEF, NRIP1, FOXO3, LPIN1, JUNB, ATF3, VEGFA	194	441	16792	1.96274	1	1	0.99131
GOTERM_BP_DIRECT	GO:0042157~lipoprotein metabolic process	3	1.46341	0.0705593	ABCA1, APOA1, APOE	194	38	16792	6.83342	1	1	0.99131
GOTERM_BP_DIRECT	GO:0010629~negative regulation of gene expression	5	2.43902	0.0734524	CITED2, TIPARP, TP53INP1, XDH, NR0B2	194	137	16792	3.159	1	1	0.99131
GOTERM_BP_DIRECT	GO:0008219~cell death	3	1.46341	0.0738283	CDKN1B, BNIP3, AXIN1	194	39	16792	6.65821	1	1	0.99131
GOTERM_BP_DIRECT	GO:0010508~positive regulation of autophagy	3	1.46341	0.0771452	BNIP3, TP53INP1, ULK1	194	40	16792	6.49175	1	1	0.99131
GOTERM_BP_DIRECT	GO:0034141~positive regulation of toll-like receptor 3 signaling pathway	2	0.97561	0.0777468	WDFY1, F2RL1	194	7	16792	24.7305	1	1	0.99131
GOTERM_BP_DIRECT	GO:0071548~response to dexamethasone	2	0.97561	0.0777468	FOXO3, PCK2	194	7	16792	24.7305	1	1	0.99131
GOTERM_BP_DIRECT	GO:0007050~cell cycle arrest	5	2.43902	0.0797361	KMT2E, CDKN1B, DDIT3, TP53INP1, NUPR2	194	141	16792	3.06939	1	1	0.99131
GOTERM_BP_DIRECT	GO:0043066~negative regulation of apoptotic process	10	4.87805	0.0800324	BNIP3L, EEF2K, CDKN1B, CITED2, BNIP3, SPHK1, MDM2, ANGPTL4, MCL1, VEGFA	194	455	16792	1.90235	1	1	0.99131
GOTERM_BP_DIRECT	GO:0032526~response to retinoic acid	3	1.46341	0.0805082	ACER2, RXRA, PPARG	194	41	16792	6.33342	1	1	0.99131
GOTERM_BP_DIRECT	GO:0010628~positive regulation of gene expression	7	3.41463	0.0824484	RGCC, NFIL3, CITED2, MDM2, HIF1A, NR0B2, VEGFA	194	262	16792	2.31258	1	1	0.99131
GOTERM_BP_DIRECT	GO:0006986~response to unfolded protein	3	1.46341	0.0839161	DNAJB1, HSPA1L, DDIT3	194	42	16792	6.18262	1	1	0.99131
GOTERM_BP_DIRECT	GO:0007595~lactation	3	1.46341	0.0839161	HIF1A, XDH, VEGFA	194	42	16792	6.18262	1	1	0.99131
GOTERM_BP_DIRECT	GO:0043525~positive regulation of neuron apoptotic process	3	1.46341	0.0873672	ATF2, DDIT3, FOXO3	194	43	16792	6.03884	1	1	0.99131
GOTERM_BP_DIRECT	GO:0006766~vitamin metabolic process	2	0.97561	0.0883512	CYP26A1, RXRA	194	8	16792	21.6392	1	1	0.99131
GOTERM_BP_DIRECT	GO:0042119~neutrophil activation	2	0.97561	0.0883512	KMT2E, F2RL1	194	8	16792	21.6392	1	1	0.99131
GOTERM_BP_DIRECT	GO:0031017~exocrine pancreas development	2	0.97561	0.0883512	PPDPF, INSR	194	8	16792	21.6392	1	1	0.99131
GOTERM_BP_DIRECT	GO:0071236~cellular response to antibiotic	2	0.97561	0.0883512	CDKN1B, MDM2	194	8	16792	21.6392	1	1	0.99131
GOTERM_BP_DIRECT	GO:0046512~sphingosine biosynthetic process	2	0.97561	0.0883512	ACER2, SPHK1	194	8	16792	21.6392	1	1	0.99131
GOTERM_BP_DIRECT	GO:0010898~positive regulation of triglyceride catabolic process	2	0.97561	0.0883512	APOA1, PNPLA2	194	8	16792	21.6392	1	1	0.99131
GOTERM_BP_DIRECT	GO:0006002~fructose 6-phosphate metabolic process	2	0.97561	0.0883512	PFKL, PFKP	194	8	16792	21.6392	1	1	0.99131
GOTERM_BP_DIRECT	GO:0097345~mitochondrial outer membrane permeabilization	2	0.97561	0.0883512	BNIP3L, BNIP3	194	8	16792	21.6392	1	1	0.99131
GOTERM_BP_DIRECT	GO:0046951~ketone body biosynthetic process	2	0.97561	0.0883512	BDH1, AACS	194	8	16792	21.6392	1	1	0.99131
GOTERM_BP_DIRECT	GO:0070244~negative regulation of thymocyte apoptotic process	2	0.97561	0.0883512	EFNA1, HIF1A	194	8	16792	21.6392	1	1	0.99131
GOTERM_BP_DIRECT	GO:0050702~interleukin-1 beta secretion	2	0.97561	0.0883512	ABCA1, F2RL1	194	8	16792	21.6392	1	1	0.99131
GOTERM_BP_DIRECT	GO:0032966~negative regulation of collagen biosynthetic process	2	0.97561	0.0883512	ERRFI1, PPARG	194	8	16792	21.6392	1	1	0.99131
GOTERM_BP_DIRECT	GO:0060100~positive regulation of phagocytosis, engulfment	2	0.97561	0.0883512	F2RL1, PPARG	194	8	16792	21.6392	1	1	0.99131
GOTERM_BP_DIRECT	GO:0002674~negative regulation of acute inflammatory response	2	0.97561	0.0883512	PPARG, ASH1L	194	8	16792	21.6392	1	1	0.99131
GOTERM_BP_DIRECT	GO:0098609~cell-cell adhesion	7	3.41463	0.0930076	DNAJB1, MICALL1, TWF2, ALDOA, BZW1, MARK2, PFKP	194	271	16792	2.23578	1	1	0.99131
GOTERM_BP_DIRECT	GO:0008542~visual learning	3	1.46341	0.0943938	APP, DDHD2, HIF1A	194	45	16792	5.77045	1	1	0.99131
GOTERM_BP_DIRECT	GO:0071363~cellular response to growth factor stimulus	3	1.46341	0.0943938	INSR, TWF2, MDM2	194	45	16792	5.77045	1	1	0.99131
GOTERM_BP_DIRECT	GO:0030336~negative regulation of cell migration	4	1.95122	0.0963787	CITED2, KRT16, TP53INP1, FAM60A	194	95	16792	3.64449	1	1	0.99131
GOTERM_BP_DIRECT	GO:0010873~positive regulation of cholesterol esterification	2	0.97561	0.0988343	APOA1, APOE	194	9	16792	19.2348	1	1	0.99131
GOTERM_BP_DIRECT	GO:0009062~fatty acid catabolic process	2	0.97561	0.0988343	PLA2G15, LPIN1	194	9	16792	19.2348	1	1	0.99131
GOTERM_BP_DIRECT	GO:1901522~positive regulation of transcription from RNA polymerase II promoter involved in cellular response to chemical stimulus	2	0.97561	0.0988343	SMAD4, RXRA	194	9	16792	19.2348	1	1	0.99131
GOTERM_BP_DIRECT	GO:0033673~negative regulation of kinase activity	2	0.97561	0.0988343	CDKN1B, IRS2	194	9	16792	19.2348	1	1	0.99131
GOTERM_BP_DIRECT	GO:0042158~lipoprotein biosynthetic process	2	0.97561	0.0988343	APOA1, APOE	194	9	16792	19.2348	1	1	0.99131
GOTERM_BP_DIRECT	GO:0043583~ear development	2	0.97561	0.0988343	SHROOM2, ECE1	194	9	16792	19.2348	1	1	0.99131
GOTERM_BP_DIRECT	GO:0055091~phospholipid homeostasis	2	0.97561	0.0988343	ABCA1, APOA1	194	9	16792	19.2348	1	1	0.99131
GOTERM_BP_DIRECT	GO:0006367~transcription initiation from RNA polymerase II promoter	5	2.43902	0.0990731	RXRA, NR1D2, PPARG, NR0B2, ESR2	194	152	16792	2.84726	1	1	0.99131
GOTERM_BP_DIRECT	GO:0042981~regulation of apoptotic process	6	2.92683	0.0995637	BNIP3L, TP53INP1, ALX4, TNFRSF14, BCL2L14, MCL1	194	213	16792	2.43822	1	1	0.99131
