# Supplementary material for: Comparative Transcriptome Analysis of Organ-Specific Adaptive Responses to Hypoxia Provides Insights to Human Diseases
Source: Genes (Basel). 2022 Jun 19;13(6):1096. doi: 10.3390/genes13061096 (PMC9222487; doi:10.3390/genes13061096)
Supplement: Supplementary file 1 [file genes-13-01096-s001.zip › Table S3.xlsx]

## Sheet: Brain down GO BP
Category	GO ID and Term Description	Count	%	p-value	Genes	List Total	Pop Hits	Pop Total	Fold Enrichment	Bonferroni	Benjamini	FDR
GOTERM_BP_DIRECT	GO:0007268~chemical synaptic transmission	25	6.28141	3.03144e-10	OPRD1, RTN3, GRIK1, GRIK2, GRM1, PTPRF, GRM3, PENK, NPTX1, NPTX2, ASIC2, SCN1B, UNC13B, UNC13C, KCND2, OPRM1, GRIN2C, GRIN1, PTPRD, CACNB2, DLG1, UNC119, APBA1, KCNK3, CBLN1	356	240	16792	4.91339	5.40809e-07	5.40809e-07	5.35049e-07
GOTERM_BP_DIRECT	GO:0007411~axon guidance	17	4.27136	2.67894e-07	ROBO2, EPHA5, ROBO3, EPHA8, NRXN3, ETV1, PAX6, UNC5C, ANK3, L1CAM, EFNA1, RELN, OPHN1, FEZ1, KIF26B, NEO1, SCN1B	356	159	16792	5.04318	0.00047781	0.000205296	0.00020311
GOTERM_BP_DIRECT	GO:0061337~cardiac conduction	10	2.51256	3.45229e-07	CACNG6, CACNB2, KCND2, KCNIP3, KCNIP4, CACNG1, CACNA2D4, CACNA1C, KCNK3, SCN1B	356	45	16792	10.4819	0.0006157	0.000205296	0.00020311
GOTERM_BP_DIRECT	GO:0007399~nervous system development	21	5.27638	3.30987e-06	PLPPR1, GRIK1, ZIC5, NR2C2, L1CAM, CPLX2, KALRN, OLFM1, NEUROD2, DLG1, MAFB, OPHN1, FUT9, NEUROD6, ERBB4, FEZ1, DPF3, CSPG5, APBA1, APOB, CBLN1	356	287	16792	3.45136	0.00588743	0.00134222	0.00132793
GOTERM_BP_DIRECT	GO:0043547~positive regulation of GTPase activity	31	7.78894	3.76184e-06	RASGRF1, ADRB1, ARHGAP39, FNBP1L, KALRN, SIPA1L3, ARHGAP22, FGF8, RGS3, OPHN1, ERBB4, CHN2, EPS8L2, ARFGEF3, GARNL3, RGS7, RAP1GAP2, FARP1, PLEKHG1, CDKL5, IQSEC3, SH2D3C, ARHGEF18, GRIN2C, GRIN1, GNAQ, RASA1, SGSM2, ELMO1, CDC42EP1, FGF10	356	565	16792	2.58801	0.00668867	0.00134222	0.00132793
GOTERM_BP_DIRECT	GO:0060079~excitatory postsynaptic potential	7	1.75879	2.17542e-05	NPAS4, GRID2, SLC17A7, GRIK2, OPRM1, GRIN2C, GRIN1	356	28	16792	11.7921	0.0380665	0.00646826	0.00639937
GOTERM_BP_DIRECT	GO:0035249~synaptic transmission, glutamatergic	6	1.50754	6.32093e-05	UNC13B, GRID2, CACNA1A, SLC17A7, GRIK2, GRIN1	356	21	16792	13.4767	0.106643	0.0161093	0.0159378
GOTERM_BP_DIRECT	GO:0035235~ionotropic glutamate receptor signaling pathway	6	1.50754	0.000125319	GRID2, GRIK1, GRIK2, GRIN2C, GRIN1, CPEB4	356	24	16792	11.7921	0.200351	0.027946	0.0276484
GOTERM_BP_DIRECT	GO:0070588~calcium ion transmembrane transport	11	2.76382	0.00021711	CACNG6, CACNB2, SLC24A4, TRPC3, CACNA1A, CACNG1, CACNA2D4, CACNA1C, OPRM1, GRIN1, SLC8A2	356	119	16792	4.36012	0.321158	0.0345628	0.0341947
GOTERM_BP_DIRECT	GO:1901379~regulation of potassium ion transmembrane transport	5	1.25628	0.000222904	DPP10, DPP6, KCNIP3, KCNIP4, KCNAB2	356	15	16792	15.7228	0.32814	0.0345628	0.0341947
GOTERM_BP_DIRECT	GO:0007215~glutamate receptor signaling pathway	5	1.25628	0.000222904	GRID2, GNAQ, GRIK1, GRIK2, GRIN2C	356	15	16792	15.7228	0.32814	0.0345628	0.0341947
GOTERM_BP_DIRECT	GO:0007417~central nervous system development	11	2.76382	0.000232485	CHST8, ROBO2, NHLH2, RELN, TLX3, CITED2, NCAN, GRIK1, PAX6, NPTX1, ASIC2	356	120	16792	4.32378	0.339529	0.0345628	0.0341947
GOTERM_BP_DIRECT	GO:0072659~protein localization to plasma membrane	8	2.01005	0.000356012	DPP10, DLG1, DPP6, KCNIP3, KCNIP4, ZDHHC23, ANK3, TNIK	356	63	16792	5.98966	0.470191	0.0488558	0.0483355
GOTERM_BP_DIRECT	GO:0035176~social behavior	7	1.75879	0.000496527	NPAS4, CNTNAP2, NRXN3, EN1, KALRN, DRD4, GRIN1	356	48	16792	6.87875	0.587708	0.0632717	0.0625979
GOTERM_BP_DIRECT	GO:0045787~positive regulation of cell cycle	6	1.50754	0.000689875	CITED2, CCPG1, FNTB, PTK6, TCF3, GDPD5	356	34	16792	8.32386	0.708047	0.0820491	0.0811753
GOTERM_BP_DIRECT	GO:0019233~sensory perception of pain	7	1.75879	0.000767436	OPRD1, KCND2, KCNA2, PENK, OPRM1, GRM1, GRIN1	356	52	16792	6.34961	0.745799	0.0855691	0.0846578
GOTERM_BP_DIRECT	GO:0016079~synaptic vesicle exocytosis	5	1.25628	0.0010627	UNC13B, UNC13C, RIMS1, CADPS, CPLX2	356	22	16792	10.7201	0.849962	0.111521	0.110333
GOTERM_BP_DIRECT	GO:0051966~regulation of synaptic transmission, glutamatergic	5	1.25628	0.00126517	GRM3, OPHN1, GRIK1, KALRN, GRM1	356	23	16792	10.254	0.895493	0.125393	0.124057
GOTERM_BP_DIRECT	GO:0010628~positive regulation of gene expression	15	3.76884	0.00142708	TLE1, CITED2, DTNBP1, PAX6, ANK3, WNT16, QKI, RIMS2, OLFM1, RIMS1, CYP26B1, MYCN, FGF8, CNTN1, APOB	356	262	16792	2.70049	0.921741	0.133996	0.132568
GOTERM_BP_DIRECT	GO:0007155~cell adhesion	21	5.27638	0.00189562	ROBO2, EPHA4, CNTNAP2, PCDH10, EPHA8, NCAN, L1CAM, PTPRF, BCAM, RELN, THEMIS2, FEZ1, ADAM12, CNTN1, ADAM9, APBA1, SVEP1, NEO1, NECTIN3, SCN1B, VCL	356	459	16792	2.15804	0.966122	0.168177	0.166386
GOTERM_BP_DIRECT	GO:0043524~negative regulation of neuron apoptotic process	10	2.51256	0.00197966	BARHL1, GPI, FGF8, RASA1, EN2, EN1, CACNA1A, GRIK2, GRIN1, CPEB4	356	132	16792	3.57337	0.970848	0.168177	0.166386
GOTERM_BP_DIRECT	GO:0048013~ephrin receptor signaling pathway	8	2.01005	0.00228723	EFNA1, EPHA5, EPHA4, EPHA6, EPHA8, RASA1, KALRN, GRIN1	356	86	16792	4.38777	0.983178	0.185473	0.183498
GOTERM_BP_DIRECT	GO:0007420~brain development	12	3.01508	0.00243435	EOMES, ROBO2, CNTNAP2, RELN, ZIC2, STMN1, ZIC1, H3F3A, SLC17A7, UNC5C, SLC38A3, KCNK3	356	190	16792	2.97907	0.98707	0.188821	0.18681
GOTERM_BP_DIRECT	GO:0007616~long-term memory	5	1.25628	0.0026921	NPAS4, RELN, RASGRF1, SLC17A7, GRIN1	356	28	16792	8.42295	0.991845	0.200113	0.197981
GOTERM_BP_DIRECT	GO:0048172~regulation of short-term neuronal synaptic plasticity	4	1.00503	0.00286783	UNC13B, GRIK2, SHISA6, SLC8A2	356	14	16792	13.4767	0.994045	0.202944	0.200783
GOTERM_BP_DIRECT	GO:0030203~glycosaminoglycan metabolic process	5	1.25628	0.00307147	B3GAT2, NCAN, B3GAT1, GPC3, CSPG5	356	29	16792	8.13251	0.995864	0.202944	0.200783
GOTERM_BP_DIRECT	GO:0001662~behavioral fear response	5	1.25628	0.00307147	NEUROD2, PENK, GRIK2, KALRN, DRD4	356	29	16792	8.13251	0.995864	0.202944	0.200783
GOTERM_BP_DIRECT	GO:0071805~potassium ion transmembrane transport	9	2.26131	0.00418769	KCNC1, KCND2, KCNC2, KCNIP3, KCNA2, KCNIP4, KCNA3, KCNAB2, KCNK3	356	121	16792	3.5084	0.999439	0.266816	0.263974
GOTERM_BP_DIRECT	GO:0009968~negative regulation of signal transduction	5	1.25628	0.00552107	SRMS, UBASH3B, RGS9BP, PTK6, RGS7	356	34	16792	6.93655	0.999949	0.339641	0.336024
GOTERM_BP_DIRECT	GO:0001764~neuron migration	8	2.01005	0.00690353	BARHL1, FZD3, RELN, CDKL5, TLX3, FBXO45, PAX6, SDCCAG8	356	105	16792	3.59379	0.999996	0.41053	0.406158
GOTERM_BP_DIRECT	GO:0021549~cerebellum development	5	1.25628	0.007483	KCNC1, CNTN1, EN1, NR2C2, FOXP2	356	37	16792	6.37413	0.999998	0.427684	0.423129
GOTERM_BP_DIRECT	GO:0051056~regulation of small GTPase mediated signal transduction	9	2.26131	0.00767147	RAP1GAP2, ARHGAP22, OPHN1, CHN2, ARHGEF18, ARHGAP39, KALRN, SIPA1L3, GARNL3	356	134	16792	3.16804	0.999999	0.427684	0.423129
GOTERM_BP_DIRECT	GO:2000463~positive regulation of excitatory postsynaptic potential	4	1.00503	0.00817793	RIMS2, RIMS1, RELN, GRIN1	356	20	16792	9.43371	1	0.442104	0.437395
GOTERM_BP_DIRECT	GO:0097151~positive regulation of inhibitory postsynaptic potential	3	0.753769	0.00872425	UNC13B, RIMS2, RIMS1	356	7	16792	20.2151	1	0.457766	0.452891
GOTERM_BP_DIRECT	GO:0048791~calcium ion-regulated exocytosis of neurotransmitter	5	1.25628	0.00901726	RIMS2, RPH3A, RIMS1, CACNA1A, SYT14	356	39	16792	6.04725	1	0.458903	0.454016
GOTERM_BP_DIRECT	GO:0034765~regulation of ion transmembrane transport	8	2.01005	0.00926038	CACNG6, KCND2, KCNA2, KCNA3, CACNA1A, CACNG1, CACNA2D4, ASIC2	356	111	16792	3.39953	1	0.458903	0.454016
GOTERM_BP_DIRECT	GO:0030154~cell differentiation	19	4.77387	0.00974019	SRMS, ZAK, CITED2, RPS3A, ZIC5, NR2C2, CPLX2, ETV5, ARHGAP22, NPAS4, NHLH2, HERC4, CENPF, ZIC2, NEUROD6, NME8, ZIC1, CSPG5, THSD7A	356	462	16792	1.93983	1	0.469635	0.464633
GOTERM_BP_DIRECT	GO:0007601~visual perception	11	2.76382	0.0106375	RIMS1, CACNB2, OLFM2, ABLIM1, ZIC2, LUM, UNC119, PAX6, PAX2, CNNM4, RPE65	356	201	16792	2.58136	1	0.499403	0.494085
GOTERM_BP_DIRECT	GO:0060080~inhibitory postsynaptic potential	3	0.753769	0.0114707	NPAS4, GRIK2, DRD4	356	8	16792	17.6882	1	0.524711	0.519123
GOTERM_BP_DIRECT	GO:0050770~regulation of axonogenesis	4	1.00503	0.0121255	EFNA1, EPHA4, CACNA1A, GRIN1	356	23	16792	8.20322	1	0.540799	0.535039
GOTERM_BP_DIRECT	GO:0034220~ion transmembrane transport	11	2.76382	0.014114	ANO1, DLG1, GRID2, GABRA6, CASQ2, GRIK1, FXYD6, GRIK2, CASQ1, ASIC2, KCNK3	356	210	16792	2.47073	1	0.614131	0.60759
GOTERM_BP_DIRECT	GO:0018108~peptidyl-tyrosine phosphorylation	9	2.26131	0.0161885	EPHA5, EPHA4, EPHA6, RELN, FGF8, ABI2, ERBB4, EPHA8, FGF10	356	153	16792	2.77462	1	0.687626	0.680303
GOTERM_BP_DIRECT	GO:0007409~axonogenesis	7	1.75879	0.0177304	NTNG2, LINGO1, LUM, PLPPR4, STMN1, ANK3, PAX2	356	98	16792	3.36918	1	0.710733	0.703164
GOTERM_BP_DIRECT	GO:2000300~regulation of synaptic vesicle exocytosis	3	0.753769	0.0179277	RIMS2, RIMS1, SEPT5	356	10	16792	14.1506	1	0.710733	0.703164
GOTERM_BP_DIRECT	GO:0090129~positive regulation of synapse maturation	3	0.753769	0.0179277	NEUROD2, RELN, NRXN3	356	10	16792	14.1506	1	0.710733	0.703164
GOTERM_BP_DIRECT	GO:0035335~peptidyl-tyrosine dephosphorylation	7	1.75879	0.0185502	PTPRD, DUSP5, MTMR1, UBASH3B, DUSP16, PTPRF, MTMR7	356	99	16792	3.33515	1	0.719424	0.711762
GOTERM_BP_DIRECT	GO:0035725~sodium ion transmembrane transport	6	1.50754	0.0191154	SLC24A4, SLC17A7, ASIC2, SCN1B, CNNM4, SLC8A2	356	73	16792	3.87687	1	0.720865	0.713188
GOTERM_BP_DIRECT	GO:0031175~neuron projection development	7	1.75879	0.0193955	CNTNAP2, EPHA8, RASGRF1, STMN1, CNTN1, DTNBP1, GDPD5	356	100	16792	3.3018	1	0.720865	0.713188
GOTERM_BP_DIRECT	GO:0014047~glutamate secretion	4	1.00503	0.0207596	UNC13B, RIMS1, APBA1, SLC17A7	356	28	16792	6.73836	1	0.726178	0.718444
GOTERM_BP_DIRECT	GO:0019228~neuronal action potential	4	1.00503	0.0207596	KCND2, KCNA2, ANK3, GRIK2	356	28	16792	6.73836	1	0.726178	0.718444
GOTERM_BP_DIRECT	GO:0007528~neuromuscular junction development	4	1.00503	0.0207596	UNC13B, CACNB2, ANK3, UTRN	356	28	16792	6.73836	1	0.726178	0.718444
GOTERM_BP_DIRECT	GO:0046839~phospholipid dephosphorylation	3	0.753769	0.0216088	PLPPR1, PLPPR3, PLPPR4	356	11	16792	12.8641	1	0.727361	0.719614
GOTERM_BP_DIRECT	GO:0001823~mesonephros development	3	0.753769	0.0216088	FGF8, PAX2, FGF10	356	11	16792	12.8641	1	0.727361	0.719614
GOTERM_BP_DIRECT	GO:0035556~intracellular signal transduction	16	4.0201	0.0250256	UNC13B, UNC13C, ZAK, RASGRF1, ADCY2, KALRN, RASA1, CHN2, PPP1R1C, STMN1, PPP1R1B, TNIK, ASB5, PLCD3, MAP3K12, RGS7	356	403	16792	1.8727	1	0.826773	0.817968
GOTERM_BP_DIRECT	GO:0071257~cellular response to electrical stimulus	3	0.753769	0.0255729	NEUROD2, RPE65, GRM1	356	12	16792	11.7921	1	0.82949	0.820656
GOTERM_BP_DIRECT	GO:0035023~regulation of Rho protein signal transduction	6	1.50754	0.0284923	FARP1, PLEKHG1, RASGRF1, ARHGEF18, EPS8L2, KALRN	356	81	16792	3.49397	1	0.891758	0.88226
GOTERM_BP_DIRECT	GO:0043410~positive regulation of MAPK cascade	6	1.50754	0.0284923	EPHA8, PSAP, IGF2, GPR37L1, ADRB2, FGF10	356	81	16792	3.49397	1	0.891758	0.88226
GOTERM_BP_DIRECT	GO:0007275~multicellular organism development	19	4.77387	0.0292482	COLEC11, TLE1, TSHZ3, CHURC1-FNTB, TSHZ1, TSHZ2, EN2, IGF2, PAX6, WNT16, PAX2, VANGL1, ANO1, HOOK1, NME8, ZNF516, GTF2IRD1, ERC1, HIVEP2	356	521	16792	1.72016	1	0.899634	0.890052
GOTERM_BP_DIRECT	GO:0048712~negative regulation of astrocyte differentiation	3	0.753769	0.0298063	MYCN, MBD1, GPR37L1	356	13	16792	10.885	1	0.901262	0.891663
GOTERM_BP_DIRECT	GO:1903779~regulation of cardiac conduction	5	1.25628	0.0304995	ITPR1, CASQ2, FXYD6, CASQ1, SLC8A2	356	56	16792	4.21148	1	0.906853	0.897195
GOTERM_BP_DIRECT	GO:0007165~signal transduction	35	8.79397	0.0338251	PLPPR1, PLPPR3, PDE1A, PLPPR4, RASGRF1, NRXN3, ITPR1, ARHGAP39, KALRN, ARHGAP22, SHF, PDE11A, OPHN1, ERBB4, CHN2, STMN1, MIER1, PENK, HIVEP2, PDE8B, UNC13B, PDIA3, LINGO1, MPP3, TLE1, GABRA6, KCNIP3, UNC5C, ANK3, ANK1, BCAM, ZFYVE16, RASA1, PPP1R1B, ZNF516	356	1161	16792	1.42196	1	0.989244	0.978709
GOTERM_BP_DIRECT	GO:2000310~regulation of N-methyl-D-aspartate selective glutamate receptor activity	3	0.753769	0.0390294	RELN, RASGRF1, OPRM1	356	15	16792	9.43371	1	1	0.989905
GOTERM_BP_DIRECT	GO:0006198~cAMP catabolic process	3	0.753769	0.0390294	PDE11A, PDE1A, PDE8B	356	15	16792	9.43371	1	1	0.989905
GOTERM_BP_DIRECT	GO:0042692~muscle cell differentiation	3	0.753769	0.0390294	H3F3A, QKI, SYNE1	356	15	16792	9.43371	1	1	0.989905
GOTERM_BP_DIRECT	GO:0032793~positive regulation of CREB transcription factor activity	3	0.753769	0.0390294	OPRD1, EPHA5, RELN	356	15	16792	9.43371	1	1	0.989905
GOTERM_BP_DIRECT	GO:0009967~positive regulation of signal transduction	5	1.25628	0.0399642	SHF, CHN2, SH2D3C, GRAP, SLA2	356	61	16792	3.86627	1	1	0.989905
GOTERM_BP_DIRECT	GO:0010976~positive regulation of neuron projection development	6	1.50754	0.0403614	RELN, FEZ1, CNTN1, PTK6, CBFA2T2, SCN1B	356	89	16792	3.1799	1	1	0.989905
GOTERM_BP_DIRECT	GO:0021633~optic nerve structural organization	2	0.502513	0.0418363	KCNA2, PAX2	356	2	16792	47.1685	1	1	0.989905
GOTERM_BP_DIRECT	GO:0045944~positive regulation of transcription from RNA polymerase II promoter	30	7.53769	0.0429127	BARHL1, CITED2, TNKS, ADRB2, NR2C2, ARNTL, NHLH2, NEUROD2, NEUROD6, ZIC1, CCNL1, EOMES, LUM, EN2, EN1, TET1, ETV1, PAX6, CBFA2T2, ETV5, PAX2, GRIN1, NPAS4, MYCN, MAFB, KLF5, CCPG1, MTF2, TCF3, FGF10	356	981	16792	1.44246	1	1	0.989905
GOTERM_BP_DIRECT	GO:0033365~protein localization to organelle	3	0.753769	0.0439942	CROCC, PAX6, BICD1	356	16	16792	8.8441	1	1	0.989905
GOTERM_BP_DIRECT	GO:0050908~detection of light stimulus involved in visual perception	3	0.753769	0.0491785	RGS9BP, CACNA2D4, RPE65	356	17	16792	8.32386	1	1	0.989905
GOTERM_BP_DIRECT	GO:0050775~positive regulation of dendrite morphogenesis	3	0.753769	0.0491785	PTPRD, EPHA4, CDKL5	356	17	16792	8.32386	1	1	0.989905
GOTERM_BP_DIRECT	GO:0050804~modulation of synaptic transmission	3	0.753769	0.0491785	RELN, CSPG5, GRIK2	356	17	16792	8.32386	1	1	0.989905
GOTERM_BP_DIRECT	GO:0050796~regulation of insulin secretion	5	1.25628	0.0532878	KCNC2, ITPR1, CACNA1A, CACNA1C, ARNTL	356	67	16792	3.52004	1	1	0.989905
GOTERM_BP_DIRECT	GO:0001709~cell fate determination	3	0.753769	0.054571	CYP26B1, PAX6, PAX2	356	18	16792	7.86142	1	1	0.989905
GOTERM_BP_DIRECT	GO:0001658~branching involved in ureteric bud morphogenesis	4	1.00503	0.0587154	DLG1, FGF8, GPC3, PAX2	356	42	16792	4.49224	1	1	0.989905
GOTERM_BP_DIRECT	GO:0023019~signal transduction involved in regulation of gene expression	3	0.753769	0.0601604	FGF8, MSX2, PAX6	356	19	16792	7.44766	1	1	0.989905
GOTERM_BP_DIRECT	GO:0010765~positive regulation of sodium ion transport	3	0.753769	0.0601604	CNTN1, ANK3, SCN1B	356	19	16792	7.44766	1	1	0.989905
GOTERM_BP_DIRECT	GO:0031649~heat generation	2	0.502513	0.0620953	ADRB1, ADRB2	356	3	16792	31.4457	1	1	0.989905
GOTERM_BP_DIRECT	GO:1990089~response to nerve growth factor	2	0.502513	0.0620953	KCNC1, KCNC2	356	3	16792	31.4457	1	1	0.989905
GOTERM_BP_DIRECT	GO:0030917~midbrain-hindbrain boundary development	2	0.502513	0.0620953	FGF8, EN1	356	3	16792	31.4457	1	1	0.989905
GOTERM_BP_DIRECT	GO:0042596~fear response	2	0.502513	0.0620953	ADRB1, DRD4	356	3	16792	31.4457	1	1	0.989905
GOTERM_BP_DIRECT	GO:0050849~negative regulation of calcium-mediated signaling	2	0.502513	0.0620953	ITPR1, SLA2	356	3	16792	31.4457	1	1	0.989905
GOTERM_BP_DIRECT	GO:0021912~regulation of transcription from RNA polymerase II promoter involved in spinal cord motor neuron fate specification	2	0.502513	0.0620953	NKX6-2, PAX6	356	3	16792	31.4457	1	1	0.989905
GOTERM_BP_DIRECT	GO:0014051~gamma-aminobutyric acid secretion	2	0.502513	0.0620953	CACNA1A, APBA1	356	3	16792	31.4457	1	1	0.989905
GOTERM_BP_DIRECT	GO:0002025~vasodilation by norepinephrine-epinephrine involved in regulation of systemic arterial blood pressure	2	0.502513	0.0620953	ADRB1, ADRB2	356	3	16792	31.4457	1	1	0.989905
GOTERM_BP_DIRECT	GO:0045540~regulation of cholesterol biosynthetic process	2	0.502513	0.0620953	SEC14L2, APOB	356	3	16792	31.4457	1	1	0.989905
GOTERM_BP_DIRECT	GO:0098912~membrane depolarization during atrial cardiac muscle cell action potential	2	0.502513	0.0620953	CACNB2, CACNA1C	356	3	16792	31.4457	1	1	0.989905
GOTERM_BP_DIRECT	GO:0021957~corticospinal tract morphogenesis	2	0.502513	0.0620953	EPHA4, FBXO45	356	3	16792	31.4457	1	1	0.989905
GOTERM_BP_DIRECT	GO:0006886~intracellular protein transport	10	2.51256	0.0640276	RIMS2, IPO13, SGSM1, RPH3A, RIMS1, KCNIP3, SGSM2, APBA1, GRIK2, MYRIP	356	236	16792	1.99867	1	1	0.989905
GOTERM_BP_DIRECT	GO:0043113~receptor clustering	3	0.753769	0.0659363	DLG1, CACNA1A, GRIK2	356	20	16792	7.07528	1	1	0.989905
GOTERM_BP_DIRECT	GO:0000186~activation of MAPKK activity	4	1.00503	0.0730771	ZAK, ADAM9, GRM1, MAP3K12	356	46	16792	4.10161	1	1	0.989905
GOTERM_BP_DIRECT	GO:0048666~neuron development	4	1.00503	0.0730771	EPHA5, NEUROD2, EN2, EN1	356	46	16792	4.10161	1	1	0.989905
GOTERM_BP_DIRECT	GO:0016477~cell migration	8	2.01005	0.0731412	EFNA1, SRMS, ABI2, ERBB4, ELMO1, ADAM9, PTK6, PTPRF	356	172	16792	2.19389	1	1	0.989905
GOTERM_BP_DIRECT	GO:0042391~regulation of membrane potential	5	1.25628	0.0743396	RIMS2, RIMS1, DLG1, ASIC2, GRIN1	356	75	16792	3.14457	1	1	0.989905
GOTERM_BP_DIRECT	GO:0007193~adenylate cyclase-inhibiting G-protein coupled receptor signaling pathway	4	1.00503	0.0768903	OPRD1, PSAP, ADCY2, GPR37L1	356	47	16792	4.01434	1	1	0.989905
GOTERM_BP_DIRECT	GO:0021759~globus pallidus development	2	0.502513	0.0819271	KCNC1, KCNC2	356	4	16792	23.5843	1	1	0.989905
GOTERM_BP_DIRECT	GO:0021800~cerebral cortex tangential migration	2	0.502513	0.0819271	RELN, FBXO45	356	4	16792	23.5843	1	1	0.989905
GOTERM_BP_DIRECT	GO:0010918~positive regulation of mitochondrial membrane potential	2	0.502513	0.0819271	VCP, BAD	356	4	16792	23.5843	1	1	0.989905
GOTERM_BP_DIRECT	GO:0018343~protein farnesylation	2	0.502513	0.0819271	CHURC1-FNTB, FNTB	356	4	16792	23.5843	1	1	0.989905
GOTERM_BP_DIRECT	GO:0090403~oxidative stress-induced premature senescence	2	0.502513	0.0819271	WNT16, ARNTL	356	4	16792	23.5843	1	1	0.989905
GOTERM_BP_DIRECT	GO:0021913~regulation of transcription from RNA polymerase II promoter involved in ventral spinal cord interneuron specification	2	0.502513	0.0819271	NKX6-2, PAX6	356	4	16792	23.5843	1	1	0.989905
GOTERM_BP_DIRECT	GO:0021889~olfactory bulb interneuron differentiation	2	0.502513	0.0819271	ERBB4, UNCX	356	4	16792	23.5843	1	1	0.989905
GOTERM_BP_DIRECT	GO:0016199~axon midline choice point recognition	2	0.502513	0.0819271	ROBO2, ROBO3	356	4	16792	23.5843	1	1	0.989905
GOTERM_BP_DIRECT	GO:0045918~negative regulation of cytolysis	2	0.502513	0.0819271	BAD, PAX2	356	4	16792	23.5843	1	1	0.989905
GOTERM_BP_DIRECT	GO:0045666~positive regulation of neuron differentiation	5	1.25628	0.0831706	NEUROD2, VWC2, TCF3, GDPD5, ETV5	356	78	16792	3.02362	1	1	0.989905
GOTERM_BP_DIRECT	GO:0007194~negative regulation of adenylate cyclase activity	3	0.753769	0.0842804	GRM3, OPRM1, DRD4	356	23	16792	6.15242	1	1	0.989905
GOTERM_BP_DIRECT	GO:0043278~response to morphine	3	0.753769	0.0842804	GPI, PENK, GRIN1	356	23	16792	6.15242	1	1	0.989905
GOTERM_BP_DIRECT	GO:0014070~response to organic cyclic compound	4	1.00503	0.0847722	FGF8, KCNC2, LUM, FNTB	356	49	16792	3.85049	1	1	0.989905
GOTERM_BP_DIRECT	GO:0000122~negative regulation of transcription from RNA polymerase II promoter	22	5.52764	0.0851925	EOMES, ZBTB18, TLE1, NKX6-2, MSX2, TSHZ3, CITED2, TSHZ1, MBD1, TSHZ2, EN1, PAX6, SLA2, FOXP2, EFNA1, DLG1, KLF5, MTF2, SMYD2, TCF3, INSM1, DACT1	356	720	16792	1.44126	1	1	0.989905
GOTERM_BP_DIRECT	GO:0007157~heterophilic cell-cell adhesion via plasma membrane cell adhesion molecules	4	1.00503	0.0888374	PTPRD, GRID2, NECTIN3, CBLN1	356	50	16792	3.77348	1	1	0.989905
GOTERM_BP_DIRECT	GO:0007189~adenylate cyclase-activating G-protein coupled receptor signaling pathway	4	1.00503	0.0888374	UCN3, GNAQ, ADCY2, ADRB2	356	50	16792	3.77348	1	1	0.989905
GOTERM_BP_DIRECT	GO:0045671~negative regulation of osteoclast differentiation	3	0.753769	0.0907018	MAFB, UBASH3B, TMEM178A	356	24	16792	5.89607	1	1	0.989905
GOTERM_BP_DIRECT	GO:0008306~associative learning	3	0.753769	0.0907018	NEUROD2, RELN, NPTX2	356	24	16792	5.89607	1	1	0.989905
GOTERM_BP_DIRECT	GO:0046856~phosphatidylinositol dephosphorylation	3	0.753769	0.0907018	MTMR1, INPP5A, MTMR7	356	24	16792	5.89607	1	1	0.989905
GOTERM_BP_DIRECT	GO:0030866~cortical actin cytoskeleton organization	3	0.753769	0.0907018	STRIP1, DLG1, EPB41L1	356	24	16792	5.89607	1	1	0.989905
GOTERM_BP_DIRECT	GO:0007269~neurotransmitter secretion	4	1.00503	0.0929829	UNC13B, RIMS1, NRXN3, APBA1	356	51	16792	3.69949	1	1	0.989905
GOTERM_BP_DIRECT	GO:0006813~potassium ion transport	5	1.25628	0.0957047	SLC24A4, KCNC1, KCNA2, KCNA3, KCNK3	356	82	16792	2.87613	1	1	0.989905
GOTERM_BP_DIRECT	GO:0050731~positive regulation of peptidyl-tyrosine phosphorylation	5	1.25628	0.0957047	EFNA1, RELN, CNTN1, IGF2, FGF10	356	82	16792	2.87613	1	1	0.989905
GOTERM_BP_DIRECT	GO:0008344~adult locomotory behavior	4	1.00503	0.0972069	OPRD1, EN1, DRD4, GRIN1	356	52	16792	3.62835	1	1	0.989905
GOTERM_BP_DIRECT	GO:0042472~inner ear morphogenesis	4	1.00503	0.0972069	FZD3, MAFB, ZIC1, PAX2	356	52	16792	3.62835	1	1	0.989905
GOTERM_BP_DIRECT	GO:0000188~inactivation of MAPK activity	3	0.753769	0.0972614	DUSP5, RGS3, DUSP16	356	25	16792	5.66022	1	1	0.989905

## Sheet: Gill down GO BP
Category	GO ID and Term Description	Count	%	p-value	Genes	List Total	Pop Hits	Pop Total	Fold Enrichment	Bonferroni	Benjamini	FDR
GOTERM_BP_DIRECT	GO:0000070~mitotic sister chromatid segregation	10	3.48432	9.9266e-11	ESPL1, SPAG5, KIFC1, PLK1, NUSAP1, KNSTRN, SMC4, NDC80, ZWINT, MAD2L1	270	25	16792	24.877	1.76396e-07	3.52791e-08	3.45247e-08
GOTERM_BP_DIRECT	GO:0000082~G1/S transition of mitotic cell cycle	11	3.83275	5.49369e-06	POLA1, RRM2, PCNA, CDK2, RPA1, CDK1, RPA2, MCM5, MCM6, POLE, MCM2	270	102	16792	6.70704	0.00971482	0.000761483	0.000745199
GOTERM_BP_DIRECT	GO:0000086~G2/M transition of mitotic cell cycle	10	3.48432	0.000365489	TPX2, CCNB1, PLK1, CDK2, CDK1, BIRC5, TERF1, UBA52, TAF2, AURKA	270	137	16792	4.53961	0.477741	0.0249797	0.0244456
GOTERM_BP_DIRECT	GO:0000281~mitotic cytokinesis	7	2.43902	5.57078e-06	ANLN, PLK1, STMN1, NUSAP1, CKAP2, KIF23, KIF20A	270	29	16792	15.012	0.00985047	0.000761483	0.000745199
GOTERM_BP_DIRECT	GO:0000722~telomere maintenance via recombination	8	2.78746	5.98418e-07	POLA1, FEN1, WRN, PCNA, POLD2, RPA1, RPA2, POLE	270	32	16792	15.5481	0.00106282	0.000106339	0.000104065
GOTERM_BP_DIRECT	GO:0000723~telomere maintenance	6	2.09059	0.000255216	WRN, PCNA, POLD2, RPA1, RPA2, TERF1	270	36	16792	10.3654	0.364649	0.0197182	0.0192966
GOTERM_BP_DIRECT	GO:0000910~cytokinesis	7	2.43902	0.000111536	ESPL1, INCENP, PRC1, PLK1, BIRC5, KIF23, KIF20A	270	48	16792	9.06975	0.179803	0.00990997	0.00969805
GOTERM_BP_DIRECT	GO:0006260~DNA replication	19	6.62021	5.73639e-11	RRM1, FEN1, DUT, RRM2, PCNA, RPA1, RPA2, ING5, POLA1, WRN, NASP, POLD2, CDK2, CDK1, MCM5, MCM6, CLSPN, POLE, MCM2	270	155	16792	7.62361	1.01936e-07	2.54839e-08	2.49389e-08
GOTERM_BP_DIRECT	GO:0006272~leading strand elongation	3	1.0453	0.000758928	POLA1, PCNA, POLE	270	3	16792	62.1926	0.740533	0.0407971	0.0399247
GOTERM_BP_DIRECT	GO:0006297~nucleotide-excision repair, DNA gap filling	6	2.09059	3.36649e-05	PCNA, POLD2, RPA1, RPA2, POLE, UBA52	270	24	16792	15.5481	0.0580692	0.00332347	0.0032524
GOTERM_BP_DIRECT	GO:0007018~microtubule-based movement	8	2.78746	0.00031705	CENPE, KIFC1, KIF14, KIF23, KIF20A, KIF11, KIF20B, KIF15	270	81	16792	6.14248	0.430779	0.0225359	0.022054
GOTERM_BP_DIRECT	GO:0007051~spindle organization	7	2.43902	1.11885e-07	ASPM, SPAG5, TTK, KIF11, KNSTRN, AURKB, AURKA	270	16	16792	27.2093	0.000198799	2.48524e-05	2.43209e-05
GOTERM_BP_DIRECT	GO:0007052~mitotic spindle organization	8	2.78746	3.71997e-07	GPSM2, CCNB1, STMN1, TTK, KIF11, NDC80, AURKA, SPC25	270	30	16792	16.5847	0.000660821	7.34488e-05	7.18782e-05
GOTERM_BP_DIRECT	GO:0007059~chromosome segregation	12	4.18118	9.93761e-09	TOP2A, CENPE, CENPF, CDCA2, SPAG5, INCENP, NUF2, SETDB2, KIF11, KNSTRN, NDC80, SPC25	270	68	16792	10.9752	1.7659e-05	2.94319e-06	2.88025e-06
GOTERM_BP_DIRECT	GO:0007062~sister chromatid cohesion	17	5.92334	7.78078e-12	PLK1, CDCA8, HDAC8, NDC80, ZWINT, AURKB, CDC20, CENPE, CENPF, INCENP, NUF2, BIRC5, SPDL1, MAD1L1, NUP37, MAD2L1, SPC25	270	103	16792	10.2648	1.38264e-08	4.60881e-09	4.51026e-09
GOTERM_BP_DIRECT	GO:0007067~mitotic nuclear division	30	10.453	4.33962e-17	CDCA2, CDCA3, NUMA1, NCAPG2, KIF11, AURKB, AURKA, KIF15, CDC20, PTTG1, NUF2, FAM83D, SETDB2, PLK1, HMGA2, VRK1, TERF1, NDC80, CCNA2, ASPM, ANLN, TPX2, CENPF, INCENP, CDK2, CDK1, BIRC5, KIF20B, NUP37, SPC25	270	248	16792	7.5233	7.71151e-14	3.85576e-14	3.7733e-14
GOTERM_BP_DIRECT	GO:0007076~mitotic chromosome condensation	7	2.43902	7.08777e-08	NUSAP1, NCAPG, NCAPD2, NCAPD3, SMC4, NCAPH, SMC2	270	15	16792	29.0232	0.000125942	1.79928e-05	1.76081e-05
GOTERM_BP_DIRECT	GO:0007077~mitotic nuclear envelope disassembly	6	2.09059	0.000662413	CCNB1, LMNA, PLK1, CDK1, VRK1, NUP37	270	44	16792	8.48081	0.691952	0.0367846	0.035998
GOTERM_BP_DIRECT	GO:0007080~mitotic metaphase plate congression	6	2.09059	0.000291268	CENPE, CCNB1, KIFC1, KIF14, CDCA8, SPDL1	270	37	16792	10.0853	0.404086	0.021566	0.0211048
GOTERM_BP_DIRECT	GO:0007094~mitotic spindle assembly checkpoint	6	2.09059	1.29414e-05	CENPF, PLK1, TTK, TERF1, MAD1L1, MAD2L1	270	20	16792	18.6578	0.0227345	0.00153312	0.00150033
GOTERM_BP_DIRECT	GO:0008283~cell proliferation	20	6.96864	7.39731e-06	DTYMK, PCNA, UHRF1, PLK1, MIF, MKI67, CUZD1, AURKB, KIF15, CKS1B, POLA1, TPX2, CENPF, NASP, LIPG, CYP1A1, CDK1, TACC3, FAM83D, DLGAP5	270	366	16792	3.3985	0.0130591	0.00093893	0.000918852
GOTERM_BP_DIRECT	GO:0010032~meiotic chromosome condensation	4	1.39373	3.96999e-05	NCAPD2, NCAPD3, SMC4, SMC2	270	5	16792	49.7541	0.0681171	0.00371299	0.00363359
GOTERM_BP_DIRECT	GO:0016925~protein sumoylation	9	3.13589	0.000591676	TOP2A, WRN, PCNA, INCENP, RPA1, CDCA8, BIRC5, AURKB, NUP37	270	117	16792	4.78405	0.650663	0.0350469	0.0342975
GOTERM_BP_DIRECT	GO:0021846~cell proliferation in forebrain	4	1.39373	0.000803545	RRM1, FABP7, KIF14, HMGA2	270	12	16792	20.7309	0.760326	0.0407971	0.0399247
GOTERM_BP_DIRECT	GO:0030261~chromosome condensation	4	1.39373	0.000448841	NCAPH2, NCAPG2, CDK1, HMGA2	270	10	16792	24.877	0.549668	0.0275031	0.026915
GOTERM_BP_DIRECT	GO:0031145~anaphase-promoting complex-dependent catabolic process	10	3.48432	4.69993e-06	CDC20, CCNB1, PTTG1, UBE2C, PLK1, CDK1, UBA52, AURKB, MAD2L1, AURKA	270	79	16792	7.87248	0.00831702	0.000759253	0.000743017
GOTERM_BP_DIRECT	GO:0032355~response to estradiol	8	2.78746	0.000644518	POSTN, PCNA, IFI27, GSTP1, MBD1, CALR, PTGS2, EZH2	270	91	16792	5.46748	0.681992	0.0367846	0.035998
GOTERM_BP_DIRECT	GO:0034501~protein localization to kinetochore	4	1.39373	0.000448841	CDK1, TTK, SPDL1, AURKB	270	10	16792	24.877	0.549668	0.0275031	0.026915
GOTERM_BP_DIRECT	GO:0042493~response to drug	15	5.22648	0.000408839	CPT1A, UGT1A1, TERF1, PTGS2, SLC6A2, HADHA, HSD11B2, CENPF, SFRP1, CCNB1, CYP1A1, CDK1, PTK2B, CALR, ADA	270	304	16792	3.06871	0.516477	0.0269077	0.0263323
GOTERM_BP_DIRECT	GO:0042769~DNA damage response, detection of DNA damage	6	2.09059	0.000255216	PCNA, POLD2, RPA1, RPA2, HMGA2, UBA52	270	36	16792	10.3654	0.364649	0.0197182	0.0192966
GOTERM_BP_DIRECT	GO:0042787~protein ubiquitination involved in ubiquitin-dependent protein catabolic process	11	3.83275	0.000181217	CDC20, CCNB1, PTTG1, UHRF1, UBE2C, PLK1, CDK1, UBA52, AURKB, MAD2L1, AURKA	270	153	16792	4.47136	0.275339	0.0153344	0.0150065
GOTERM_BP_DIRECT	GO:0051301~cell division	47	16.3763	6.65363e-29	CDCA2, CDCA3, NUMA1, NCAPG2, KIF14, NCAPG, CDCA8, KIF11, CUZD1, SMC4, NCAPH, AURKA, CKS1B, SMC2, CDC20, CCNB3, CCNB1, PTTG1, NUF2, SPDL1, FAM83D, SPAG5, UBE2C, SETDB2, HMGA2, VRK1, TERF1, KNSTRN, NDC80, ZWINT, CCNA2, CENPE, TPX2, CENPF, KIFC1, CDK2, CDK1, TACC3, BIRC5, MCM5, NCAPD2, NCAPD3, KIF20B, MAD1L1, NUP37, MAD2L1, SPC25	270	350	16792	8.35158	1.18235e-25	1.18235e-25	1.15707e-25
GOTERM_BP_DIRECT	GO:0051310~metaphase plate congression	4	1.39373	0.000803545	CENPE, CENPF, FAM83D, NDC80	270	12	16792	20.7309	0.760326	0.0407971	0.0399247
GOTERM_BP_DIRECT	GO:0051436~negative regulation of ubiquitin-protein ligase activity involved in mitotic cell cycle	7	2.43902	0.000957832	CDC20, CCNB1, UBE2C, CDK2, CDK1, UBA52, MAD2L1	270	71	16792	6.13166	0.817842	0.0472797	0.0462686
GOTERM_BP_DIRECT	GO:0051439~regulation of ubiquitin-protein ligase activity involved in mitotic cell cycle	6	2.09059	2.70031e-05	CDC20, CCNB1, UBE2C, PLK1, CDK2, CDK1	270	23	16792	16.2242	0.0468521	0.00299903	0.0029349
GOTERM_BP_DIRECT	GO:1901796~regulation of signal transduction by p53 class mediator	11	3.83275	3.09189e-05	ING5, TPX2, WRN, CSNK2A2, CDK2, RPA1, RPA2, UBA52, TAF2, AURKB, AURKA	270	124	16792	5.51708	0.0534617	0.00323194	0.00316283
GOTERM_BP_DIRECT	GO:0006270~DNA replication initiation	5	1.88679	0.00120634	POLA1, MCM5, MCM6, POLE, MCM2	249	32	16792	10.5371	0.862871	0.0536657	0.0521334
GOTERM_BP_DIRECT	GO:0007018~microtubule-based movement	7	2.64151	0.001258	CENPE, KIFC1, KIF14, KIF23, KIF20A, KIF11, KIF20B	249	81	16792	5.82795	0.874064	0.0539468	0.0524064
GOTERM_BP_DIRECT	GO:0031577~spindle checkpoint	3	1.13208	0.0012782	BIRC5, SPDL1, AURKB	249	4	16792	50.5783	0.878187	0.0539468	0.0524064
GOTERM_BP_DIRECT	GO:0007155~cell adhesion	17	6.41509	0.00135946	POSTN, CCL11, MUC16, LAMB2, INPPL1, DPT, PTPRK, THBS2, MSLN, CX3CL1, ADGRE1, ACAN, VCAN, COL4A6, PKP1, COL6A3, TMEM8A	249	459	16792	2.49769	0.893455	0.0559417	0.0543444
GOTERM_BP_DIRECT	GO:0006284~base-excision repair	5	1.88679	0.00169674	FEN1, WRN, RPA1, RPA2, HMGA2	249	35	16792	9.63396	0.938898	0.0681179	0.0661729
GOTERM_BP_DIRECT	GO:0019985~translesion synthesis	5	1.88679	0.00188696	PCNA, POLD2, RPA1, RPA2, UBA52	249	36	16792	9.36635	0.955348	0.0739507	0.0718391
GOTERM_BP_DIRECT	GO:0042493~response to drug	13	4.90566	0.00193615	CPT1A, UGT1A1, TERF1, PTGS2, SLC6A2, HADHA, CENPF, CCNB1, CYP1A1, CDK1, PTK2B, CALR, ADA	249	304	16792	2.88385	0.958828	0.0741141	0.0719978
GOTERM_BP_DIRECT	GO:0006296~nucleotide-excision repair, DNA incision, 5'-to lesion	5	1.88679	0.00209144	PCNA, POLD2, RPA1, RPA2, UBA52	249	37	16792	9.11321	0.968131	0.0771638	0.0749604
GOTERM_BP_DIRECT	GO:0051304~chromosome separation	3	1.13208	0.00210958	TTK, NCAPD2, NCAPD3	249	5	16792	40.4627	0.96907	0.0771638	0.0749604
GOTERM_BP_DIRECT	GO:0006977~DNA damage response, signal transduction by p53 class mediator resulting in cell cycle arrest	6	2.26415	0.00220089	CCNB1, PCNA, CDK2, CDK1, UBA52, AURKA	249	62	16792	6.52623	0.973395	0.0787536	0.0765049
GOTERM_BP_DIRECT	GO:0033683~nucleotide-excision repair, DNA incision	5	1.88679	0.00231073	PCNA, POLD2, RPA1, RPA2, UBA52	249	38	16792	8.87339	0.977804	0.0809247	0.078614
GOTERM_BP_DIRECT	GO:0042276~error-prone translesion synthesis	4	1.50943	0.00258887	PCNA, RPA1, RPA2, UBA52	249	19	16792	14.1974	0.985974	0.0852257	0.0827921
GOTERM_BP_DIRECT	GO:0070987~error-free translesion synthesis	4	1.50943	0.00258887	PCNA, RPA1, RPA2, UBA52	249	19	16792	14.1974	0.985974	0.0852257	0.0827921
GOTERM_BP_DIRECT	GO:0051276~chromosome organization	4	1.50943	0.00258887	PTTG1, NCAPH2, CDCA8, SMC4	249	19	16792	14.1974	0.985974	0.0852257	0.0827921
GOTERM_BP_DIRECT	GO:0006281~DNA repair	11	4.15094	0.00267601	POLA1, FEN1, WRN, PTTG1, UHRF1, CDK2, RPA1, CDK1, CLSPN, POLE, ASF1A	249	235	16792	3.15666	0.987852	0.0863668	0.0839007
GOTERM_BP_DIRECT	GO:0045143~homologous chromosome segregation	3	1.13208	0.00313357	PTTG1, ESPL1, PLK1	249	6	16792	33.7189	0.994292	0.0991896	0.0963574
GOTERM_BP_DIRECT	GO:0000132~establishment of mitotic spindle orientation	4	1.50943	0.00347689	GPSM2, NUMA1, SPDL1, NDC80	249	21	16792	12.8453	0.996762	0.107981	0.104897
GOTERM_BP_DIRECT	GO:0006325~chromatin organization	5	1.88679	0.00364742	PADI2, HMGA2, HDAC8, EZH2, HMGN1	249	43	16792	7.8416	0.997557	0.111179	0.108004
GOTERM_BP_DIRECT	GO:0097190~apoptotic signaling pathway	6	2.26415	0.0039788	IFI27, DAPL1, CASP10, ADORA1, RIPK1, TNFRSF14	249	71	16792	5.69896	0.998587	0.119075	0.115674
GOTERM_BP_DIRECT	GO:0000083~regulation of transcription involved in G1/S transition of mitotic cell cycle	4	1.50943	0.00453028	POLA1, RRM2, PCNA, CDK1	249	23	16792	11.7283	0.999432	0.133158	0.129356
GOTERM_BP_DIRECT	GO:0022617~extracellular matrix disassembly	6	2.26415	0.00532068	ACAN, MMP11, GSN, HTRA1, NID1, FBN1	249	76	16792	5.32403	0.999846	0.153646	0.149259
GOTERM_BP_DIRECT	GO:0051315~attachment of mitotic spindle microtubules to kinetochore	3	1.13208	0.00573623	CENPE, NDC80, MAD1L1	249	8	16792	25.2892	0.999923	0.160031	0.155462
GOTERM_BP_DIRECT	GO:0050848~regulation of calcium-mediated signaling	3	1.13208	0.00573623	PTK2B, GBP1, CMKLR1	249	8	16792	25.2892	0.999923	0.160031	0.155462
GOTERM_BP_DIRECT	GO:0014070~response to organic cyclic compound	5	1.88679	0.00584572	CPT1A, CYP1A1, CDK1, MKI67, TAF2	249	49	16792	6.8814	0.999936	0.160368	0.155788
GOTERM_BP_DIRECT	GO:0045840~positive regulation of mitotic nuclear division	4	1.50943	0.00643809	EPGN, NUSAP1, TERF1, AURKA	249	26	16792	10.375	0.999976	0.173723	0.168762
GOTERM_BP_DIRECT	GO:0030071~regulation of mitotic metaphase/anaphase transition	3	1.13208	0.00730363	CENPE, UBE2C, PLK1	249	9	16792	22.4793	0.999994	0.18495	0.179669
GOTERM_BP_DIRECT	GO:0010389~regulation of G2/M transition of mitotic cell cycle	3	1.13208	0.00730363	CCNB3, CENPF, KIF14	249	9	16792	22.4793	0.999994	0.18495	0.179669
GOTERM_BP_DIRECT	GO:0010226~response to lithium ion	3	1.13208	0.00730363	PTK2B, ASCL1, PTGS2	249	9	16792	22.4793	0.999994	0.18495	0.179669
GOTERM_BP_DIRECT	GO:1904668~positive regulation of ubiquitin protein ligase activity	3	1.13208	0.00730363	CDC20, UBE2C, PLK1	249	9	16792	22.4793	0.999994	0.18495	0.179669
GOTERM_BP_DIRECT	GO:0045931~positive regulation of mitotic cell cycle	4	1.50943	0.00793834	CCNB1, CDK1, BIRC5, TERF1	249	28	16792	9.63396	0.999998	0.197977	0.192324
GOTERM_BP_DIRECT	GO:0030198~extracellular matrix organization	9	3.39623	0.00887052	ACAN, VCAN, POSTN, ECM2, LAMB2, COL4A6, COL6A3, NID1, FBN1	249	196	16792	3.09663	1	0.212595	0.206525
GOTERM_BP_DIRECT	GO:0055015~ventricular cardiac muscle cell development	3	1.13208	0.00904112	CCNB1, LMNA, CDK1	249	10	16792	20.2313	1	0.212595	0.206525
GOTERM_BP_DIRECT	GO:0060487~lung epithelial cell differentiation	3	1.13208	0.00904112	GPSM2, NUMA1, ASCL1	249	10	16792	20.2313	1	0.212595	0.206525
GOTERM_BP_DIRECT	GO:0006268~DNA unwinding involved in DNA replication	3	1.13208	0.00904112	TOP2A, MCM6, MCM2	249	10	16792	20.2313	1	0.212595	0.206525
GOTERM_BP_DIRECT	GO:0032355~response to estradiol	6	2.26415	0.0112178	POSTN, PCNA, IFI27, CALR, PTGS2, EZH2	249	91	16792	4.44645	1	0.260063	0.252637
GOTERM_BP_DIRECT	GO:0007093~mitotic cell cycle checkpoint	4	1.50943	0.011511	TTK, ZWINT, MAD1L1, MAD2L1	249	32	16792	8.42972	1	0.263155	0.255641
GOTERM_BP_DIRECT	GO:0016266~O-glycan processing	5	1.88679	0.0118662	GALNT7, GALNT12, B3GNT7, MUC16, MUC5B	249	60	16792	5.61981	1	0.267559	0.259919
GOTERM_BP_DIRECT	GO:0043065~positive regulation of apoptotic process	11	4.15094	0.0139705	TOP2A, ING5, PLEKHG5, TRIM35, HMGA2, RIPK1, FOXL2, TERF1, PTGS2, UBA52, PPID	249	300	16792	2.47272	1	0.31075	0.301877
GOTERM_BP_DIRECT	GO:0006298~mismatch repair	4	1.50943	0.0147067	PCNA, POLD2, RPA1, RPA2	249	35	16792	7.70717	1	0.322763	0.313547
GOTERM_BP_DIRECT	GO:0007049~cell cycle	9	3.39623	0.0156715	CDC20, DTYMK, NASP, UHRF1, CUZD1, AURKB, AURKA, MCM2, CKS1B	249	217	16792	2.79696	1	0.339292	0.329604
GOTERM_BP_DIRECT	GO:0090307~mitotic spindle assembly	4	1.50943	0.0158721	TPX2, KIFC1, BIRC5, KIF11	249	36	16792	7.49308	1	0.339292	0.329604
GOTERM_BP_DIRECT	GO:0001501~skeletal system development	7	2.64151	0.0161618	ACAN, VCAN, POSTN, ANKH, ALPL, FBN1, CMKLR1	249	137	16792	3.44572	1	0.341055	0.331316
GOTERM_BP_DIRECT	GO:0032467~positive regulation of cytokinesis	4	1.50943	0.0170881	KIF14, KIF23, KIF20B, AURKB	249	37	16792	7.29057	1	0.356037	0.345871
GOTERM_BP_DIRECT	GO:0030890~positive regulation of B cell proliferation	4	1.50943	0.0196721	PTPRC, ATAD5, MIF, ADA	249	39	16792	6.91669	1	0.40342	0.391901
GOTERM_BP_DIRECT	GO:0007095~mitotic G2 DNA damage checkpoint	3	1.13208	0.0200975	CCNA2, CDK1, HMGA2	249	15	16792	13.4876	1	0.40342	0.391901
GOTERM_BP_DIRECT	GO:0006271~DNA strand elongation involved in DNA replication	3	1.13208	0.0200975	POLA1, PCNA, POLD2	249	15	16792	13.4876	1	0.40342	0.391901
GOTERM_BP_DIRECT	GO:0070098~chemokine-mediated signaling pathway	5	1.88679	0.0208691	CCL11, PTK2B, CCL19, CX3CL1, CMKLR1	249	71	16792	4.74914	1	0.412293	0.400521
GOTERM_BP_DIRECT	GO:0007346~regulation of mitotic cell cycle	4	1.50943	0.0210405	PLK1, BIRC5, ASCL1, CKS1B	249	40	16792	6.74378	1	0.412293	0.400521
GOTERM_BP_DIRECT	GO:0071356~cellular response to tumor necrosis factor	6	2.26415	0.0236224	POSTN, CCL11, ZC3H12A, RIPK1, CCL19, CX3CL1	249	110	16792	3.67842	1	0.457441	0.444379
GOTERM_BP_DIRECT	GO:0044849~estrous cycle	3	1.13208	0.0255332	EGR1, TRPM2, PCNA	249	17	16792	11.9008	1	0.488693	0.474739
GOTERM_BP_DIRECT	GO:0006635~fatty acid beta-oxidation	4	1.50943	0.0270233	HADHB, HADHA, CPT1A, CROT	249	44	16792	6.1307	1	0.505459	0.491026
GOTERM_BP_DIRECT	GO:0034644~cellular response to UV	4	1.50943	0.0270233	PCNA, PTPRK, PTGS2, AURKB	249	44	16792	6.1307	1	0.505459	0.491026
GOTERM_BP_DIRECT	GO:0033280~response to vitamin D	3	1.13208	0.0284493	ALPL, PTGS2, AQP3	249	18	16792	11.2396	1	0.524584	0.509605
GOTERM_BP_DIRECT	GO:0042323~negative regulation of circadian sleep/wake cycle, non-REM sleep	2	0.754717	0.0293206	ADORA1, ADA	249	2	16792	67.4378	1	0.524584	0.509605
GOTERM_BP_DIRECT	GO:0070256~negative regulation of mucus secretion	2	0.754717	0.0293206	ADORA1, ADA	249	2	16792	67.4378	1	0.524584	0.509605
GOTERM_BP_DIRECT	GO:0000022~mitotic spindle elongation	2	0.754717	0.0293206	PRC1, KIF23	249	2	16792	67.4378	1	0.524584	0.509605
GOTERM_BP_DIRECT	GO:0001659~temperature homeostasis	3	1.13208	0.0314917	TRPM2, ADORA1, ADRB1	249	19	16792	10.6481	1	0.555197	0.539344
GOTERM_BP_DIRECT	GO:0031100~organ regeneration	4	1.50943	0.0320436	CCNA2, UGT1A1, CDK1, MKI67	249	47	16792	5.73938	1	0.555197	0.539344
GOTERM_BP_DIRECT	GO:0045860~positive regulation of protein kinase activity	4	1.50943	0.0320436	CENPE, PTPRC, PTK2B, CCL19	249	47	16792	5.73938	1	0.555197	0.539344
GOTERM_BP_DIRECT	GO:0006508~proteolysis	14	5.28302	0.0351809	ST14, HTRA1, KLK15, PLAT, F5, PRSS21, MMP11, ACAN, CASP7, ESPL1, CASP10, SCRN3, LTA4H, TAF2	249	500	16792	1.88826	1	0.603207	0.585983
GOTERM_BP_DIRECT	GO:0008544~epidermis development	5	1.88679	0.037141	COL17A1, SCEL, KRT17, CRABP2, EVPL	249	85	16792	3.96693	1	0.630249	0.612253
GOTERM_BP_DIRECT	GO:0043066~negative regulation of apoptotic process	13	4.90566	0.0384747	PLK1, KIF14, HMGA2, MIF, ASCL1, AURKA, PLAC8, ADORA1, CDK1, PTK2B, BIRC5, UBA52, MAD2L1	249	455	16792	1.92679	1	0.646218	0.627766
GOTERM_BP_DIRECT	GO:0006915~apoptotic process	15	5.66038	0.0424244	CSNK2A2, CKAP2, TPX2, CASP7, ESPL1, CASP10, ZC3H12A, TRIM35, CDK1, PTK2B, BIRC5, MAL, RIPK1, PPID, MCM2	249	567	16792	1.78407	1	0.684395	0.664852
GOTERM_BP_DIRECT	GO:0001666~response to hypoxia	7	2.64151	0.0428372	EGR1, POSTN, ADORA1, CYP1A1, PTK2B, PLAT, ADA	249	172	16792	2.74456	1	0.684395	0.664852
GOTERM_BP_DIRECT	GO:0046777~protein autophosphorylation	7	2.64151	0.0428372	WNK2, PTK2B, RIPK1, VRK1, TTK, AURKB, AURKA	249	172	16792	2.74456	1	0.684395	0.664852
GOTERM_BP_DIRECT	GO:0051383~kinetochore organization	2	0.754717	0.0436582	SMC4, SMC2	249	3	16792	44.9585	1	0.684395	0.664852
GOTERM_BP_DIRECT	GO:0035583~sequestering of TGFbeta in extracellular matrix	2	0.754717	0.0436582	LTBP1, FBN1	249	3	16792	44.9585	1	0.684395	0.664852
GOTERM_BP_DIRECT	GO:0009263~deoxyribonucleotide biosynthetic process	2	0.754717	0.0436582	RRM1, RRM2	249	3	16792	44.9585	1	0.684395	0.664852
GOTERM_BP_DIRECT	GO:0033144~negative regulation of intracellular steroid hormone receptor signaling pathway	2	0.754717	0.0436582	HMGA2, CALR	249	3	16792	44.9585	1	0.684395	0.664852
GOTERM_BP_DIRECT	GO:0021987~cerebral cortex development	4	1.50943	0.0497889	ASPM, KIF14, TACC3, ASCL1	249	56	16792	4.81698	1	0.766591	0.744701
GOTERM_BP_DIRECT	GO:0070301~cellular response to hydrogen peroxide	4	1.50943	0.0520023	TRPM2, PCNA, CDK1, EZH2	249	57	16792	4.73247	1	0.766591	0.744701
GOTERM_BP_DIRECT	GO:0071346~cellular response to interferon-gamma	4	1.50943	0.0520023	CCL11, MRC1, CCL19, CX3CL1	249	57	16792	4.73247	1	0.766591	0.744701
GOTERM_BP_DIRECT	GO:0046686~response to cadmium ion	3	1.13208	0.0521617	DTYMK, PCNA, CDK1	249	25	16792	8.09253	1	0.766591	0.744701
GOTERM_BP_DIRECT	GO:0015949~nucleobase-containing small molecule interconversion	3	1.13208	0.0521617	RRM1, DTYMK, RRM2	249	25	16792	8.09253	1	0.766591	0.744701
GOTERM_BP_DIRECT	GO:0001578~microtubule bundle formation	3	1.13208	0.0521617	PRC1, PLK1, KIF20A	249	25	16792	8.09253	1	0.766591	0.744701
GOTERM_BP_DIRECT	GO:0007569~cell aging	3	1.13208	0.0521617	WRN, CDK1, MIF	249	25	16792	8.09253	1	0.766591	0.744701
GOTERM_BP_DIRECT	GO:0006259~DNA metabolic process	3	1.13208	0.055972	WRN, MKI67, KPNA2	249	26	16792	7.78128	1	0.786066	0.76362
GOTERM_BP_DIRECT	GO:0071407~cellular response to organic cyclic compound	4	1.50943	0.0565695	PLA2G4F, CCNB1, CYP1A1, ALPL	249	59	16792	4.57205	1	0.786066	0.76362
GOTERM_BP_DIRECT	GO:0045132~meiotic chromosome segregation	2	0.754717	0.0577849	SMC4, SMC2	249	4	16792	33.7189	1	0.786066	0.76362
GOTERM_BP_DIRECT	GO:0016321~female meiosis chromosome segregation	2	0.754717	0.0577849	PLK1, TTK	249	4	16792	33.7189	1	0.786066	0.76362
GOTERM_BP_DIRECT	GO:0002906~negative regulation of mature B cell apoptotic process	2	0.754717	0.0577849	MIF, ADA	249	4	16792	33.7189	1	0.786066	0.76362
GOTERM_BP_DIRECT	GO:0040001~establishment of mitotic spindle localization	2	0.754717	0.0577849	ESPL1, NUSAP1	249	4	16792	33.7189	1	0.786066	0.76362
GOTERM_BP_DIRECT	GO:0055118~negative regulation of cardiac muscle contraction	2	0.754717	0.0577849	ZC3H12A, ADORA1	249	4	16792	33.7189	1	0.786066	0.76362
GOTERM_BP_DIRECT	GO:0051661~maintenance of centrosome location	2	0.754717	0.0577849	ASPM, GPSM2	249	4	16792	33.7189	1	0.786066	0.76362
GOTERM_BP_DIRECT	GO:0007079~mitotic chromosome movement towards spindle pole	2	0.754717	0.0577849	CENPE, DLGAP5	249	4	16792	33.7189	1	0.786066	0.76362
GOTERM_BP_DIRECT	GO:0018146~keratan sulfate biosynthetic process	3	1.13208	0.0638718	ACAN, B3GNT7, CHST2	249	28	16792	7.22547	1	0.85474	0.830334
GOTERM_BP_DIRECT	GO:0048247~lymphocyte chemotaxis	3	1.13208	0.0638718	CCL11, CCL19, CX3CL1	249	28	16792	7.22547	1	0.85474	0.830334
GOTERM_BP_DIRECT	GO:0006294~nucleotide-excision repair, preincision complex assembly	3	1.13208	0.0679542	RPA1, RPA2, UBA52	249	29	16792	6.97632	1	0.892558	0.867072
GOTERM_BP_DIRECT	GO:0097421~liver regeneration	3	1.13208	0.0679542	PCNA, EZH2, AURKA	249	29	16792	6.97632	1	0.892558	0.867072
GOTERM_BP_DIRECT	GO:1990314~cellular response to insulin-like growth factor stimulus	2	0.754717	0.0717037	CCNA2, FBN1	249	5	16792	26.9751	1	0.892558	0.867072
GOTERM_BP_DIRECT	GO:0031915~positive regulation of synaptic plasticity	2	0.754717	0.0717037	CDC20, PTGS2	249	5	16792	26.9751	1	0.892558	0.867072
GOTERM_BP_DIRECT	GO:0007100~mitotic centrosome separation	2	0.754717	0.0717037	KIF11, AURKA	249	5	16792	26.9751	1	0.892558	0.867072
GOTERM_BP_DIRECT	GO:0010656~negative regulation of muscle cell apoptotic process	2	0.754717	0.0717037	ZC3H12A, PTK2B	249	5	16792	26.9751	1	0.892558	0.867072
GOTERM_BP_DIRECT	GO:0000212~meiotic spindle organization	2	0.754717	0.0717037	ESPL1, AURKA	249	5	16792	26.9751	1	0.892558	0.867072
GOTERM_BP_DIRECT	GO:0040020~regulation of meiotic nuclear division	2	0.754717	0.0717037	CDC20, CALR	249	5	16792	26.9751	1	0.892558	0.867072
GOTERM_BP_DIRECT	GO:2000379~positive regulation of reactive oxygen species metabolic process	3	1.13208	0.0721204	ZC3H12A, RIPK1, XDH	249	30	16792	6.74378	1	0.892558	0.867072
GOTERM_BP_DIRECT	GO:0034504~protein localization to nucleus	3	1.13208	0.0721204	LMNA, CALR, SYNE2	249	30	16792	6.74378	1	0.892558	0.867072
GOTERM_BP_DIRECT	GO:0002244~hematopoietic progenitor cell differentiation	4	1.50943	0.0739763	TOP2A, ANLN, PTPRC, COL24A1	249	66	16792	4.08714	1	0.908694	0.882748
GOTERM_BP_DIRECT	GO:0071392~cellular response to estradiol stimulus	3	1.13208	0.076367	CCNA2, UGT1A1, H2AFZ	249	31	16792	6.52623	1	0.931112	0.904525
GOTERM_BP_DIRECT	GO:0050873~brown fat cell differentiation	3	1.13208	0.0806907	PLAC8, ADRB1, PTGS2	249	32	16792	6.32229	1	0.956447	0.929136
GOTERM_BP_DIRECT	GO:0043161~proteasome-mediated ubiquitin-dependent protein catabolic process	7	2.64151	0.0818912	CDC20, UBE2C, CDK1, KIF14, CLOCK, UBA52, MAD2L1	249	203	16792	2.32544	1	0.956447	0.929136
GOTERM_BP_DIRECT	GO:0002686~negative regulation of leukocyte migration	2	0.754717	0.0854178	ADORA1, ADA	249	6	16792	22.4793	1	0.956447	0.929136
GOTERM_BP_DIRECT	GO:0035965~cardiolipin acyl-chain remodeling	2	0.754717	0.0854178	HADHB, HADHA	249	6	16792	22.4793	1	0.956447	0.929136
GOTERM_BP_DIRECT	GO:0045842~positive regulation of mitotic metaphase/anaphase transition	2	0.754717	0.0854178	ESPL1, DLGAP5	249	6	16792	22.4793	1	0.956447	0.929136
GOTERM_BP_DIRECT	GO:1990000~amyloid fibril formation	2	0.754717	0.0854178	GSN, RIPK1	249	6	16792	22.4793	1	0.956447	0.929136
GOTERM_BP_DIRECT	GO:0031536~positive regulation of exit from mitosis	2	0.754717	0.0854178	UBE2C, BIRC5	249	6	16792	22.4793	1	0.956447	0.929136
GOTERM_BP_DIRECT	GO:0090166~Golgi disassembly	2	0.754717	0.0854178	CDK1, VRK1	249	6	16792	22.4793	1	0.956447	0.929136
GOTERM_BP_DIRECT	GO:0021695~cerebellar cortex development	2	0.754717	0.0854178	KIF14, EZH2	249	6	16792	22.4793	1	0.956447	0.929136
GOTERM_BP_DIRECT	GO:0010216~maintenance of DNA methylation	2	0.754717	0.0854178	DNMT1, UHRF1	249	6	16792	22.4793	1	0.956447	0.929136
GOTERM_BP_DIRECT	GO:0071168~protein localization to chromatin	2	0.754717	0.0854178	PLK1, EZH2	249	6	16792	22.4793	1	0.956447	0.929136
GOTERM_BP_DIRECT	GO:0009437~carnitine metabolic process	2	0.754717	0.0854178	CPT1A, CROT	249	6	16792	22.4793	1	0.956447	0.929136
GOTERM_BP_DIRECT	GO:0071347~cellular response to interleukin-1	4	1.50943	0.0876881	CCL11, ZC3H12A, CCL19, CX3CL1	249	71	16792	3.79931	1	0.975234	0.947387
GOTERM_BP_DIRECT	GO:0043123~positive regulation of I-kappaB kinase/NF-kappaB signaling	6	2.26415	0.0915676	TRIM62, CASP10, PLEKHG5, RIPK1, CCL19, UBA52	249	161	16792	2.51321	1	1	0.972036
GOTERM_BP_DIRECT	GO:0000731~DNA synthesis involved in DNA repair	3	1.13208	0.0940933	POLA1, WRN, POLE	249	35	16792	5.78038	1	1	0.972036
GOTERM_BP_DIRECT	GO:0033209~tumor necrosis factor-mediated signaling pathway	5	1.88679	0.097544	KRT8, PTK2B, RIPK1, TNFRSF14, UBA52	249	118	16792	2.85753	1	1	0.972036
GOTERM_BP_DIRECT	GO:0090267~positive regulation of mitotic cell cycle spindle assembly checkpoint	2	0.754717	0.09893	NDC80, MAD2L1	249	7	16792	19.2679	1	1	0.972036
GOTERM_BP_DIRECT	GO:0051988~regulation of attachment of spindle microtubules to kinetochore	2	0.754717	0.09893	SPAG5, KNSTRN	249	7	16792	19.2679	1	1	0.972036
GOTERM_BP_DIRECT	GO:0043031~negative regulation of macrophage activation	2	0.754717	0.09893	ADGRF5, ZC3H12A	249	7	16792	19.2679	1	1	0.972036
GOTERM_BP_DIRECT	GO:0090305~nucleic acid phosphodiester bond hydrolysis	4	1.50943	0.0993679	POLA1, FEN1, WRN, POLE	249	75	16792	3.59668	1	1	0.972036

## Sheet: HK down GO BP
Category	GO ID and Term Description	Count	%	p-value	Genes	List Total	Pop Hits	Pop Total	Fold Enrichment	Bonferroni	Benjamini	FDR
GOTERM_BP_DIRECT	GO:0006695~cholesterol biosynthetic process	15	22.0588	1.62342e-25	FDPS, HMGCS1, CYP51A1, MSMO1, APOA4, DHCR24, HMGCR, HSD17B7, LSS, TM7SF2, SQLE, EBP, NSDHL, CYB5R3, FDFT1	63	38	16792	105.213	6.5911e-23	6.5911e-23	6.49369e-23
GOTERM_BP_DIRECT	GO:0055114~oxidation-reduction process	15	22.0588	2.39943e-08	CYP51A1, MTHFR, MSMO1, DHCR24, HMGCR, HSD17B7, FMO5, TM7SF2, CYB5R2, GRHPR, SQLE, NSDHL, CYB5R3, SC5D, FDFT1	63	592	16792	6.75354	9.74164e-06	4.87085e-06	4.79886e-06
GOTERM_BP_DIRECT	GO:0016126~sterol biosynthetic process	4	5.88235	5.64682e-06	CYB5R2, SQLE, MSMO1, TM7SF2	63	10	16792	106.616	0.00228999	0.000764204	0.00075291
GOTERM_BP_DIRECT	GO:0008299~isoprenoid biosynthetic process	4	5.88235	1.6949e-05	FDPS, HMGCS1, HMGCR, FDFT1	63	14	16792	76.1542	0.00685774	0.00172033	0.0016949
GOTERM_BP_DIRECT	GO:0033490~cholesterol biosynthetic process via lathosterol	3	4.41176	8.00981e-05	EBP, SC5D, DHCR24	63	4	16792	199.905	0.031998	0.00541997	0.00533987
GOTERM_BP_DIRECT	GO:0033489~cholesterol biosynthetic process via desmosterol	3	4.41176	8.00981e-05	EBP, SC5D, DHCR24	63	4	16792	199.905	0.031998	0.00541997	0.00533987
GOTERM_BP_DIRECT	GO:0008203~cholesterol metabolic process	5	7.35294	0.000114957	SQLE, EBP, SCAP, APOA4, LDLR	63	68	16792	19.5985	0.0456028	0.00666752	0.00656899
GOTERM_BP_DIRECT	GO:0006694~steroid biosynthetic process	4	5.88235	0.000220266	NSDHL, CYP51A1, LSS, FDFT1	63	32	16792	33.3175	0.0855547	0.0111785	0.0110133
GOTERM_BP_DIRECT	GO:0042632~cholesterol homeostasis	4	5.88235	0.00170123	EPHX2, APOA4, MALRD1, LDLR	63	64	16792	16.6587	0.49907	0.0767446	0.0756104
GOTERM_BP_DIRECT	GO:0006696~ergosterol biosynthetic process	2	2.94118	0.00737106	C14ORF1, FDFT1	63	2	16792	266.54	0.950398	0.299265	0.294842
GOTERM_BP_DIRECT	GO:0006629~lipid metabolic process	4	5.88235	0.020285	HMGCS1, SC5D, NPHP3, LDLR	63	157	16792	6.79082	0.999756	0.742749	0.731772
GOTERM_BP_DIRECT	GO:0070508~cholesterol import	2	2.94118	0.0219532	STARD5, LDLR	63	6	16792	88.8466	0.999878	0.742749	0.731772
GOTERM_BP_DIRECT	GO:0034214~protein hexamerization	2	2.94118	0.029165	VCP, MAT2A	63	8	16792	66.6349	0.999994	0.910844	0.897384
GOTERM_BP_DIRECT	GO:0016125~sterol metabolic process	2	2.94118	0.0747828	EBP, CYP51A1	63	21	16792	25.3847	1	1	0.987654
GOTERM_BP_DIRECT	GO:0017144~drug metabolic process	2	2.94118	0.0951195	EPHX2, FMO5	63	27	16792	19.7437	1	1	0.987654

## Sheet: Liver down GO BP
Category	GO ID and Term Description	Count	%	p-value	Genes	List Total	Pop Hits	Pop Total	Fold Enrichment	Bonferroni	Benjamini	FDR
GOTERM_BP_DIRECT	GO:0006695~cholesterol biosynthetic process	6	8.69565	2.88511e-07	FDPS, EBP, APOA4, DHCR24, HSD17B7, TM7SF2	64	38	16792	41.4276	0.000138476	0.000138486	0.000138486
GOTERM_BP_DIRECT	GO:0042493~response to drug	7	10.1449	0.000957478	ABCC1, CPT1A, CDH1, SST, TXNIP, MTHFR, FOS	64	304	16792	6.04153	0.368596	0.229795	0.229795
GOTERM_BP_DIRECT	GO:0071398~cellular response to fatty acid	3	4.34783	0.00333131	CPT1A, NR1H4, LDLR	64	23	16792	34.2228	0.798446	0.533009	0.533009
GOTERM_BP_DIRECT	GO:0033490~cholesterol biosynthetic process via lathosterol	2	2.89855	0.0149242	EBP, DHCR24	64	4	16792	131.188	0.999266	1	1
GOTERM_BP_DIRECT	GO:0033489~cholesterol biosynthetic process via desmosterol	2	2.89855	0.0149242	EBP, DHCR24	64	4	16792	131.188	0.999266	1	1
GOTERM_BP_DIRECT	GO:0043401~steroid hormone mediated signaling pathway	3	4.34783	0.0193675	PAQR7, NR1H4, NR2F6	64	57	16792	13.8092	0.999916	1	1
GOTERM_BP_DIRECT	GO:0055114~oxidation-reduction process	7	10.1449	0.0232821	BLVRB, MTHFR, DHCR24, HSD17B7, FMO5, CYP8B1, TM7SF2	64	592	16792	3.10241	0.999988	1	1
GOTERM_BP_DIRECT	GO:0042632~cholesterol homeostasis	3	4.34783	0.0240587	EPHX2, APOA4, LDLR	64	64	16792	12.2988	0.999992	1	1
GOTERM_BP_DIRECT	GO:0008203~cholesterol metabolic process	3	4.34783	0.0269273	EBP, APOA4, LDLR	64	68	16792	11.5754	0.999998	1	1
GOTERM_BP_DIRECT	GO:0090181~regulation of cholesterol metabolic process	2	2.89855	0.0296292	EPHX2, NR1H4	64	8	16792	65.5938	0.999999	1	1
GOTERM_BP_DIRECT	GO:0006972~hyperosmotic response	2	2.89855	0.0332716	SST, HNMT	64	9	16792	58.3056	1	1	1
GOTERM_BP_DIRECT	GO:2000188~regulation of cholesterol homeostasis	2	2.89855	0.0332716	NR1H4, LDLR	64	9	16792	58.3056	1	1	1
GOTERM_BP_DIRECT	GO:0009636~response to toxic substance	3	4.34783	0.0405282	CDH1, EPHX2, FOS	64	85	16792	9.26029	1	1	1
GOTERM_BP_DIRECT	GO:0036503~ERAD pathway	2	2.89855	0.0548449	VCP, TRIM25	64	15	16792	34.9833	1	1	1
GOTERM_BP_DIRECT	GO:0048545~response to steroid hormone	2	2.89855	0.0724601	PAQR7, SST	64	20	16792	26.2375	1	1	1
GOTERM_BP_DIRECT	GO:0016125~sterol metabolic process	2	2.89855	0.0759442	EBP, CYP8B1	64	21	16792	24.9881	1	1	1
GOTERM_BP_DIRECT	GO:0035902~response to immobilization stress	2	2.89855	0.0759442	FOS, HNMT	64	21	16792	24.9881	1	1	1
GOTERM_BP_DIRECT	GO:0001676~long-chain fatty acid metabolic process	2	2.89855	0.0759442	CPT1A, ACOT1	64	21	16792	24.9881	1	1	1
GOTERM_BP_DIRECT	GO:0036152~phosphatidylethanolamine acyl-chain remodeling	2	2.89855	0.0863194	LPCAT3, PLBD1	64	24	16792	21.8646	1	1	1
GOTERM_BP_DIRECT	GO:0036151~phosphatidylcholine acyl-chain remodeling	2	2.89855	0.0965798	LPCAT3, PLBD1	64	27	16792	19.4352	1	1	1
GOTERM_BP_DIRECT	GO:0017144~drug metabolic process	2	2.89855	0.0965798	EPHX2, FMO5	64	27	16792	19.4352	1	1	1

## Sheet: Intestine down GO BP
Category	GO ID and Term Description	Count	%	p-value	Genes	List Total	Pop Hits	Pop Total	Fold Enrichment	Bonferroni	Benjamini	FDR
GOTERM_BP_DIRECT	GO:0060071~Wnt signaling pathway, planar cell polarity pathway	6	6.45161	0.000102722	PSMD8, PSMC4, PSMB3, AP2S1, RHOA, PSMA8	86	92	16792	12.7341	0.0632461	0.0606775	0.0604867
GOTERM_BP_DIRECT	GO:0055114~oxidation-reduction process	12	12.9032	0.00019081	QDPR, CYP2J2, GLUD1, GSTO1, ADI1, CYP51A1, OGFOD3, TXNDC12, ME3, HMGCR, HSD17B12, ALDH9A1	86	592	16792	3.95789	0.114291	0.0606775	0.0604867
GOTERM_BP_DIRECT	GO:0019886~antigen processing and presentation of exogenous peptide antigen via MHC class II	5	5.37634	0.00121769	SEC13, AP2S1, HLA-DPB1, DYNLL1, DYNLL2	86	92	16792	10.6117	0.53926	0.226924	0.22621
GOTERM_BP_DIRECT	GO:0006635~fatty acid beta-oxidation	4	4.30108	0.00142719	HADHA, CPT1A, ABCD3, CROT	86	44	16792	17.7505	0.596809	0.226924	0.22621
GOTERM_BP_DIRECT	GO:0006521~regulation of cellular amino acid metabolic process	4	4.30108	0.00218772	PSMD8, PSMC4, PSMB3, PSMA8	86	51	16792	15.3142	0.75165	0.278278	0.277403
GOTERM_BP_DIRECT	GO:0002479~antigen processing and presentation of exogenous peptide antigen via MHC class I, TAP-dependent	4	4.30108	0.00399395	PSMD8, PSMC4, PSMB3, PSMA8	86	63	16792	12.3972	0.921545	0.413633	0.412332
GOTERM_BP_DIRECT	GO:0038061~NIK/NF-kappaB signaling	4	4.30108	0.00455256	PSMD8, PSMC4, PSMB3, PSMA8	86	66	16792	11.8337	0.945089	0.413633	0.412332
GOTERM_BP_DIRECT	GO:0051437~positive regulation of ubiquitin-protein ligase activity involved in regulation of mitotic cell cycle transition	4	4.30108	0.00674543	PSMD8, PSMC4, PSMB3, PSMA8	86	76	16792	10.2766	0.986494	0.477377	0.475876
GOTERM_BP_DIRECT	GO:0050852~T cell receptor signaling pathway	5	5.37634	0.00675533	PSMD8, PSMC4, PSMB3, HLA-DPB1, PSMA8	86	148	16792	6.59648	0.986579	0.477377	0.475876
GOTERM_BP_DIRECT	GO:0031145~anaphase-promoting complex-dependent catabolic process	4	4.30108	0.00750598	PSMD8, PSMC4, PSMB3, PSMA8	86	79	16792	9.88637	0.991703	0.47738	0.475879
GOTERM_BP_DIRECT	GO:0043488~regulation of mRNA stability	4	4.30108	0.0153958	PSMD8, PSMC4, PSMB3, PSMA8	86	103	16792	7.58275	0.999948	0.853152	0.850469
GOTERM_BP_DIRECT	GO:0002223~stimulatory C-type lectin receptor signaling pathway	4	4.30108	0.0162025	PSMD8, PSMC4, PSMB3, PSMA8	86	105	16792	7.43832	0.999969	0.853152	0.850469
GOTERM_BP_DIRECT	GO:0006418~tRNA aminoacylation for protein translation	3	3.22581	0.0174386	VARS, LARS, MRPL39	86	40	16792	14.6442	0.999986	0.853152	0.850469
GOTERM_BP_DIRECT	GO:0015936~coenzyme A metabolic process	2	2.15054	0.0200963	HMGCR, CROT	86	4	16792	97.6279	0.999998	0.883835	0.881056
GOTERM_BP_DIRECT	GO:0033209~tumor necrosis factor-mediated signaling pathway	4	4.30108	0.0220193	PSMD8, PSMC4, PSMB3, PSMA8	86	118	16792	6.61884	0.999999	0.883835	0.881056
GOTERM_BP_DIRECT	GO:0090263~positive regulation of canonical Wnt signaling pathway	4	4.30108	0.0230027	PSMD8, PSMC4, PSMB3, PSMA8	86	120	16792	6.50853	1	0.883835	0.881056
GOTERM_BP_DIRECT	GO:0031100~organ regeneration	3	3.22581	0.0236245	PFKFB1, UGT1A1, GSTP1	86	47	16792	12.4631	1	0.883835	0.881056
GOTERM_BP_DIRECT	GO:0021762~substantia nigra development	3	3.22581	0.0255345	GLUD1, DYNLL1, RHOA	86	49	16792	11.9544	1	0.902217	0.89938
GOTERM_BP_DIRECT	GO:0009437~carnitine metabolic process	2	2.15054	0.0299943	CPT1A, CROT	86	6	16792	65.0853	1	1	0.998425
GOTERM_BP_DIRECT	GO:0006621~protein retention in ER lumen	2	2.15054	0.0446562	GPAA1, KDELR2	86	9	16792	43.3902	1	1	0.998425
GOTERM_BP_DIRECT	GO:0042921~glucocorticoid receptor signaling pathway	2	2.15054	0.0446562	PTGES3, CALR	86	9	16792	43.3902	1	1	0.998425
GOTERM_BP_DIRECT	GO:0033138~positive regulation of peptidyl-serine phosphorylation	3	3.22581	0.0489983	NTRK3, PARK7, CD44	86	70	16792	8.36811	1	1	0.998425
GOTERM_BP_DIRECT	GO:0098869~cellular oxidant detoxification	3	3.22581	0.0489983	GSTO1, GSTP1, PARK7	86	70	16792	8.36811	1	1	0.998425
GOTERM_BP_DIRECT	GO:0033762~response to glucagon	2	2.15054	0.0494947	QDPR, PFKFB1	86	10	16792	39.0512	1	1	0.998425
GOTERM_BP_DIRECT	GO:0090090~negative regulation of canonical Wnt signaling pathway	4	4.30108	0.0497971	PSMD8, PSMC4, PSMB3, PSMA8	86	163	16792	4.79155	1	1	0.998425
GOTERM_BP_DIRECT	GO:0051436~negative regulation of ubiquitin-protein ligase activity involved in mitotic cell cycle	3	3.22581	0.0502567	PSMD8, PSMC4, PSMB3	86	71	16792	8.25025	1	1	0.998425
GOTERM_BP_DIRECT	GO:0016236~macroautophagy	3	3.22581	0.0567203	DYNLL1, TOMM20, DYNLL2	86	76	16792	7.70747	1	1	0.998425
GOTERM_BP_DIRECT	GO:0045454~cell redox homeostasis	3	3.22581	0.0580463	TMX2, TXNDC12, PDIA6	86	77	16792	7.60737	1	1	0.998425
GOTERM_BP_DIRECT	GO:0038095~Fc-epsilon receptor signaling pathway	4	4.30108	0.0615956	PSMD8, PSMC4, PSMB3, PSMA8	86	178	16792	4.38777	1	1	0.998425
GOTERM_BP_DIRECT	GO:0006457~protein folding	4	4.30108	0.0632594	NUDCD2, CALR, PDIA6, MPDU1	86	180	16792	4.33902	1	1	0.998425
GOTERM_BP_DIRECT	GO:0033540~fatty acid beta-oxidation using acyl-CoA oxidase	2	2.15054	0.0638653	NUDT19, CROT	86	13	16792	30.0394	1	1	0.998425
GOTERM_BP_DIRECT	GO:0016032~viral process	5	5.37634	0.0651668	EIF4A1, PSMB3, DYNLL1, RHOA, IPO5	86	299	16792	3.26515	1	1	0.998425
GOTERM_BP_DIRECT	GO:0000209~protein polyubiquitination	4	4.30108	0.0666494	PSMD8, PSMC4, PSMB3, PSMA8	86	184	16792	4.24469	1	1	0.998425
GOTERM_BP_DIRECT	GO:0042493~response to drug	5	5.37634	0.0683801	HADHA, CPT1A, ABCD3, UGT1A1, CALR	86	304	16792	3.21144	1	1	0.998425
GOTERM_BP_DIRECT	GO:0048013~ephrin receptor signaling pathway	3	3.22581	0.0704491	NTRK3, AP2S1, RHOA	86	86	16792	6.81125	1	1	0.998425
GOTERM_BP_DIRECT	GO:0006450~regulation of translational fidelity	2	2.15054	0.0733262	VARS, LARS	86	15	16792	26.0341	1	1	0.998425
GOTERM_BP_DIRECT	GO:0043651~linoleic acid metabolic process	2	2.15054	0.0826926	CYP2J2, GSTP1	86	17	16792	22.9713	1	1	0.998425
GOTERM_BP_DIRECT	GO:0043161~proteasome-mediated ubiquitin-dependent protein catabolic process	4	4.30108	0.0838488	PSMD8, PSMC4, PSMB3, PSMA8	86	203	16792	3.84741	1	1	0.998425
GOTERM_BP_DIRECT	GO:1902236~negative regulation of endoplasmic reticulum stress-induced intrinsic apoptotic signaling pathway	2	2.15054	0.0919654	TXNDC12, PARK7	86	19	16792	20.5532	1	1	0.998425
GOTERM_BP_DIRECT	GO:0071385~cellular response to glucocorticoid stimulus	2	2.15054	0.0965671	UGT1A1, GSTP1	86	20	16792	19.5256	1	1	0.998425
GOTERM_BP_DIRECT	GO:0045471~response to ethanol	3	3.22581	0.0990645	NTRK3, GSTP1, HMGCR	86	105	16792	5.57874	1	1	0.998425
