# Supplementary material for: Comparative Transcriptome Analysis of Organ-Specific Adaptive Responses to Hypoxia Provides Insights to Human Diseases
Source: Genes (Basel). 2022 Jun 19;13(6):1096. doi: 10.3390/genes13061096 (PMC9222487; doi:10.3390/genes13061096)
Supplement: Supplementary file 1 [file genes-13-01096-s001.zip › Table S4.xlsx]

## Sheet: 工作表1
Gene regulation	GO ID	Description
Up	GO:0015812	gamma-aminobutyric acid transport
Up	GO:0006814	sodium ion transport
Up	GO:0006810	transport
Up	GO:0006811	ion transport
Up	GO:0034220	ion transmembrane transport
Up and Down	GO:0070588	calcium ion transmembrane transport
Up and Down	GO:0007215	glutamate receptor signaling pathway
Up	GO:2000310	regulation of N-methyl-D-aspartate selective glutamate receptor activity
Down	GO:1901379	regulation of potassium ion transmembrane transport
Up	GO:2000311	regulation of alpha-amino-3-hydroxy-5-methyl-4-isoxazole propionate selective glutamate receptor activity
Up and Down	GO:0035235	ionotropic glutamate receptor signaling pathway
Up	GO:0048010	vascular endothelial growth factor receptor signaling pathway
Up	GO:0050900	leukocyte migration
Up	GO:0030334	regulation of cell migration
Up	GO:0048013	ephrin receptor signaling pathway
Up	GO:0038033	positive regulation of endothelial cell chemotaxis by VEGF-activated vascular endothelial growth factor receptor signaling pathway
Up	GO:0001764	neuron migration
Down	GO:0007417	central nervous system development
Up	GO:2001028	positive regulation of endothelial cell chemotaxis
Up	GO:0048843	negative regulation of axon extension involved in axon guidance
Up	GO:0007420	brain development
Up	GO:0050919	negative chemotaxis
Up and Down	GO:0007411	axon guidance
Up	GO:0051965	positive regulation of synapse assembly
Up	GO:0002042	cell migration involved in sprouting angiogenesis
Up	GO:0048842	positive regulation of axon extension involved in axon guidance
Up	GO:0048813	dendrite morphogenesis
Up	GO:0010977	negative regulation of neuron projection development
Up and Down	GO:0007399	nervous system development
Up	GO:0001822	kidney development
Up	GO:0008360	regulation of cell shape
Up	GO:0007507	heart development
Up	GO:0002063	chondrocyte development
Up	GO:0051491	positive regulation of filopodium assembly
Up	GO:0001525	angiogenesis
Down	GO:0035249	synaptic transmission, glutamatergic
Up and Down	GO:0007268	chemical synaptic transmission
Up	GO:0007269	neurotransmitter secretion
Up	GO:0007165	signal transduction
Down	GO:0061337	cardiac conduction
Up	GO:0051966	regulation of synaptic transmission, glutamatergic
Down	GO:0060079	excitatory postsynaptic potential
Up	GO:0035556	intracellular signal transduction
Up	GO:0007611	learning or memory
Up	GO:0007612	learning
Up	GO:0051056	regulation of small GTPase mediated signal transduction
Up	GO:0019933	cAMP-mediated signaling
Up	GO:0007616	long-term memory
Up	GO:0007156	homophilic cell adhesion via plasma membrane adhesion molecules
Up	GO:0007155	cell adhesion
Up	GO:0007157	heterophilic cell-cell adhesion via plasma membrane cell adhesion molecules
Up	GO:0045471	response to ethanol
Up	GO:0032355	response to estradiol
Up	GO:0071320	cellular response to cAMP
Up	GO:0061418	regulation of transcription from RNA polymerase II promoter in response to hypoxia
Up	GO:0001666	response to hypoxia
Up	GO:0008285	negative regulation of cell proliferation
Up	GO:0001938	positive regulation of endothelial cell proliferation
Up	GO:0043087	regulation of GTPase activity
Up and Down	GO:0043547	positive regulation of GTPase activity
Up	GO:0018401	peptidyl-proline hydroxylation to 4-hydroxy-L-proline
Down	GO:0072659	protein localization to plasma membrane
Up	GO:0043065	positive regulation of apoptotic process
Up	GO:0030198	extracellular matrix organization
Up	GO:0071526	semaphorin-plexin signaling pathway
Up	GO:0006468	protein phosphorylation
Up	GO:0031623	receptor internalization
Up	GO:0042493	response to drug
