# Supplementary material for: Comparative Transcriptome Analysis of Organ-Specific Adaptive Responses to Hypoxia Provides Insights to Human Diseases
Source: Genes (Basel). 2022 Jun 19;13(6):1096. doi: 10.3390/genes13061096 (PMC9222487; doi:10.3390/genes13061096)
Supplement: Supplementary file 1 [file genes-13-01096-s001.zip › Table S5.xlsx]

## Sheet: 工作表1
Gene regulation	GO ID	Description
Down	GO:0006260	DNA replication
Down	GO:0006272	leading strand elongation
Down	GO:0007059	chromosome segregation
Down	GO:0000722	telomere maintenance via recombination
Down	GO:0000723	telomere maintenance
Down	GO:0007076	mitotic chromosome condensation
Down	GO:0007062	sister chromatid cohesion
Down	GO:0051310	metaphase plate congression
Down	GO:0007080	mitotic metaphase plate congression
Down	GO:0000082	G1/S transition of mitotic cell cycle
Down	GO:0030261	chromosome condensation
Down	GO:0007094	mitotic spindle assembly checkpoint
Down	GO:0010032	meiotic chromosome condensation
Down	GO:0000070	mitotic sister chromatid segregation
Down	GO:0007067	mitotic nuclear division
Down	GO:0000910	cytokinesis
Down	GO:0007052	mitotic spindle organization
Down	GO:0007051	spindle organization
Down	GO:0051436	negative regulation of ubiquitin-protein ligase activity involved in mitotic cell cycle
Down	GO:0000281	mitotic cytokinesis
Down	GO:0000086	G2/M transition of mitotic cell cycle
Down	GO:0051439	regulation of ubiquitin-protein ligase activity involved in mitotic cell cycle
Down	GO:0007077	mitotic nuclear envelope disassembly
Down	GO:0051301	cell division
Down	GO:0007018	microtubule-based movement
Down	GO:0016925	protein sumoylation
Down	GO:0042787	protein ubiquitination involved in ubiquitin-dependent protein catabolic process
Down	GO:0031145	anaphase-promoting complex-dependent catabolic process
Up	GO:0055114	oxidation-reduction process
Up	GO:0061621	canonical glycolysis
Up	GO:0006094	gluconeogenesis
Up	GO:0006096	glycolytic process
Up	GO:0006006	glucose metabolic process
Up	GO:0008285	negative regulation of cell proliferation
Down	GO:0021846	cell proliferation in forebrain
Down	GO:0008283	cell proliferation
Up	GO:0061418	regulation of transcription from RNA polymerase II promoter in response to hypoxia
Up	GO:0001666	response to hypoxia
Up	GO:0006198	cAMP catabolic process
Down	GO:1901796	regulation of signal transduction by p53 class mediator
Down	GO:0006297	nucleotide-excision repair, DNA gap filling
Up	GO:0030388	fructose 1,6-bisphosphate metabolic process
Down	GO:0034501	protein localization to kinetochore
Down	GO:0042493	response to drug
Down	GO:0042769	DNA damage response, detection of DNA damage
Down	GO:0032355	response to estradiol
Up	GO:0018401	peptidyl-proline hydroxylation to 4-hydroxy-L-proline
