# Supplementary material for: Comparative Transcriptome Analysis of Organ-Specific Adaptive Responses to Hypoxia Provides Insights to Human Diseases
Source: Genes (Basel). 2022 Jun 19;13(6):1096. doi: 10.3390/genes13061096 (PMC9222487; doi:10.3390/genes13061096)
Supplement: Supplementary file 1 [file genes-13-01096-s001.zip › Table S6.xlsx]

## Sheet: 工作表1
Gene	Fold Change	GO terms
APOA4	0.089	GO:0006695~cholesterol biosynthetic process	GO:0008203~cholesterol metabolic process	-	-
CYB5R3	0.277437	GO:0006695~cholesterol biosynthetic process	-	-	-
CYP51A1	0.104613	GO:0006695~cholesterol biosynthetic process	-	-	-
DHCR24	0.141841	GO:0006695~cholesterol biosynthetic process	-	GO:0033489~cholesterol biosynthetic process via desmosterol	GO:0033490~cholesterol biosynthetic process via lathosterol
EBP	0.0969856	GO:0006695~cholesterol biosynthetic process	GO:0008203~cholesterol metabolic process	GO:0033489~cholesterol biosynthetic process via desmosterol	GO:0033490~cholesterol biosynthetic process via lathosterol
FDFT1	0.0766993	GO:0006695~cholesterol biosynthetic process	-	-	-
FDPS	0.0748915	GO:0006695~cholesterol biosynthetic process	-	-	-
HMGCR	0.106411	GO:0006695~cholesterol biosynthetic process	-	-	-
HMGCS1	0.123584	GO:0006695~cholesterol biosynthetic process	-	-	-
HSD17B7	0.0735725	GO:0006695~cholesterol biosynthetic process	-	-	-
LDLR	0.13	-	GO:0008203~cholesterol metabolic process	-	-
LSS	0.111306	GO:0006695~cholesterol biosynthetic process		-	-
MSMO1	0.0975206	GO:0006695~cholesterol biosynthetic process	-	-	-
NSDHL	0.249207	GO:0006695~cholesterol biosynthetic process	-	-	-
SC5D	0.103	-	-	GO:0033489~cholesterol biosynthetic process via desmosterol	GO:0033490~cholesterol biosynthetic process via lathosterol
SCAP	0.246	-	GO:0008203~cholesterol metabolic process	-	-
SQLE	0.108345	GO:0006695~cholesterol biosynthetic process	GO:0008203~cholesterol metabolic process	-	-
TM7SF2	0.0679005	GO:0006695~cholesterol biosynthetic process	-	-	-
