# Supplementary material for: Comparative Transcriptome Analysis of Organ-Specific Adaptive Responses to Hypoxia Provides Insights to Human Diseases
Source: Genes (Basel). 2022 Jun 19;13(6):1096. doi: 10.3390/genes13061096 (PMC9222487; doi:10.3390/genes13061096)
Supplement: Supplementary file 1 [file genes-13-01096-s001.zip › Table S8.xlsx]

## Sheet: Brain up KEGG
Category	KEGG ID and Term Description	Count	%	p-value	Genes	List Total	Pop Hits	Pop Total	Fold Enrichment	Bonferroni	Benjamini	FDR
KEGG_PATHWAY	hsa04724:Glutamatergic synapse	25	3.0303	3.54097e-10	GRIA1, SLC1A1, GRIK4, GRIK1, ADCY2, GRIK2, ADCY1, ADCY8, GNAI2, PLD2, GRIN2A, GRM5, GRM4, SLC17A6, DLGAP1, SLC38A3, GRIA3, GRIA4, KCNJ3, HOMER1, PRKCB, GRIN2B, GRIN1, GRIN2D, DLG4	325	114	6879	4.6417	8.14423e-08	7.81693e-08	6.59341e-08
KEGG_PATHWAY	hsa04360:Axon guidance	26	3.15152	6.79733e-10	SEMA5A, ITGB1, NRP1, SEMA7A, ROCK2, SEMA3A, SEMA3G, CXCR4, EFNA5, NTN1, ROBO1, GNAI2, EFNB2, ABLIM1, RGS3, PLXNA1, EPHA5, EPHA6, UNC5A, SEMA4B, SEMA4C, UNC5D, EFNA3, CXCL12, MET, NGEF	325	127	6879	4.33323	1.56339e-07	7.81693e-08	6.59341e-08
KEGG_PATHWAY	hsa05033:Nicotine addiction	14	1.69697	1.68054e-08	GRIA1, GABRP, GABRA1, GABRB1, SLC32A1, GABRA5, CACNA1B, GRIN2B, GRIN1, GRIN2D, GRIN2A, SLC17A6, GRIA3, GRIA4	325	40	6879	7.40815	3.86522e-06	1.28841e-06	1.08675e-06
KEGG_PATHWAY	hsa04514:Cell adhesion molecules (CAMs)	23	2.78788	6.4565e-07	ITGB1, CNTNAP2, NLGN1, VCAM1, NLGN4X, CADM1, ITGA4, SDC2, NRXN3, VTCN1, PVR, GLG1, CLDN11, CDH5, CDH4, ALCAM, CLDN23, CLDN7, NCAM1, CD22, LRRC4B, NECTIN1, CD276	325	142	6879	3.42832	0.000148489	3.71249e-05	3.1314e-05
KEGG_PATHWAY	hsa04727:GABAergic synapse	16	1.93939	8.04938e-06	GABRP, GABRA1, GABRB1, GABARAPL1, SLC32A1, PRKCB, GABRA5, GAD1, CACNA1B, GAD2, ADCY2, ADCY1, SLC6A1, ADCY8, GNAI2, SLC38A3	325	85	6879	3.98422	0.00184965	0.000370271	0.000312316
KEGG_PATHWAY	hsa04723:Retrograde endocannabinoid signaling	17	2.06061	1.68236e-05	GRIA1, GABRP, GABRA1, GABRB1, SLC32A1, PRKCB, GABRA5, CACNA1B, ADCY2, ADCY1, ADCY8, GNAI2, GRM5, SLC17A6, GRIA3, GRIA4, KCNJ3	325	101	6879	3.56262	0.00386198	0.000556328	0.00046925
KEGG_PATHWAY	hsa04024:cAMP signaling pathway	25	3.0303	1.69317e-05	GRIA1, ADCYAP1R1, ROCK2, ADCY2, PIK3R2, ADCY1, PIK3R1, ADCY8, GNAI2, PLD2, GRIN2A, EDNRA, NPY, PDE4B, GRIA3, GRIA4, JUN, ATP1B4, ATP1B3, ATP1B1, GRIN2B, GRIN1, GRIN2D, CAMK4, MYL9	325	198	6879	2.67249	0.00388675	0.000556328	0.00046925
KEGG_PATHWAY	hsa04670:Leukocyte transendothelial migration	18	2.18182	2.34307e-05	ITGB1, VCAM1, NCF1, ITGA4, ROCK2, PRKCB, ACTN1, CXCR4, PIK3R2, PIK3R1, GNAI2, CLDN11, CDH5, CXCL12, CLDN23, CLDN7, EZR, MYL9	325	115	6879	3.31296	0.00537463	0.000673633	0.000568195
KEGG_PATHWAY	hsa04713:Circadian entrainment	16	1.93939	3.21761e-05	GRIA1, ADCYAP1R1, PRKCB, ADCY2, ADCY1, ADCY8, GRIN2B, GNAI2, GRIN1, GRIN2D, GRIN2A, NOS1, GRIA3, PRKG1, GRIA4, KCNJ3	325	95	6879	3.56483	0.0073733	0.000822277	0.000693573
KEGG_PATHWAY	hsa05031:Amphetamine addiction	13	1.57576	4.81432e-05	GRIA1, JUN, MAOB, MAOA, PRKCB, PDYN, GRIN2B, GRIN1, GRIN2D, GRIN2A, CAMK4, GRIA3, GRIA4	325	66	6879	4.16909	0.0110121	0.00110729	0.000933977
KEGG_PATHWAY	hsa05032:Morphine addiction	15	1.81818	7.90812e-05	GABRP, GABRA1, GABRB1, SLC32A1, PDE1C, PRKCB, GABRA5, CACNA1B, ADCY2, ARRB1, ADCY1, ADCY8, GNAI2, PDE4B, KCNJ3	325	91	6879	3.48893	0.018025	0.00165352	0.0013947
KEGG_PATHWAY	hsa04971:Gastric acid secretion	13	1.57576	0.000133622	KCNJ10, PRKCB, ATP1B4, ATP1B3, ADCY2, ADCY1, SLC4A2, ATP1B1, ADCY8, GNAI2, MYLK, SST, EZR	325	73	6879	3.76932	0.0302675	0.00255119	0.00215187
KEGG_PATHWAY	hsa04022:cGMP-PKG signaling pathway	20	2.42424	0.000144197	MEF2C, KCNJ8, ROCK2, PRKCE, NPR2, ATP2A2, ATP1B4, ATP1B3, ADCY2, ADCY1, ATP1B1, ADCY8, SLC8A1, GNAI2, MYLK, SLC8A3, EDNRA, KCNMA1, MYL9, PRKG1	325	158	6879	2.67926	0.0326238	0.00255119	0.00215187
KEGG_PATHWAY	hsa04270:Vascular smooth muscle contraction	16	1.93939	0.000359154	CALCRL, ROCK2, PRKCB, PRKCE, NPR2, ADCY2, ADCY1, ADCY8, MYLK, EDNRA, CALD1, KCNMA1, PRKCQ, RAMP1, MYL9, PRKG1	325	117	6879	2.89452	0.0792992	0.00567565	0.00478729
KEGG_PATHWAY	hsa04960:Aldosterone-regulated sodium reabsorption	9	1.09091	0.000379325	SLC9A3R2, HSD11B2, PRKCB, ATP1B4, PIK3R2, ATP1B3, PIK3R1, ATP1B1, SGK1	325	39	6879	4.8845	0.0835624	0.00567565	0.00478729
KEGG_PATHWAY	hsa05030:Cocaine addiction	10	1.21212	0.000394828	GRIN2A, JUN, MAOB, MAOA, DLG4, PDYN, GRIN2B, GNAI2, GRIN1, GRIN2D	325	49	6879	4.31962	0.0868255	0.00567565	0.00478729
KEGG_PATHWAY	hsa04066:HIF-1 signaling pathway	14	1.69697	0.000517283	EGLN1, EGLN3, EGLN2, TFRC, EPO, PRKCB, SERPINE1, SLC2A1, PIK3R2, ENO1, PIK3R1, HIF1A, VEGFA, MKNK2	325	96	6879	3.08673	0.112197	0.00699853	0.00590311
KEGG_PATHWAY	hsa04020:Calcium signaling pathway	20	2.42424	0.000717591	PDE1C, PRKCB, CACNA1B, ATP2A2, ADCY2, ADCY1, ADCY8, CACNA1E, SLC8A1, GRIN1, GRIN2D, MYLK, SLC8A3, GRM5, EDNRA, GRIN2A, CCKAR, CAMK4, ITPKA, NOS1	325	179	6879	2.36493	0.152195	0.00916922	0.00773403
KEGG_PATHWAY	hsa04921:Oxytocin signaling pathway	17	2.06061	0.00176803	JUN, MEF2C, CAMK1D, ROCK2, PRKCB, NPR2, ADCY2, ADCY1, ADCY8, GNAI2, MYLK, CACNB2, CAMK4, CACNG2, CACNG3, MYL9, KCNJ3	325	150	6879	2.39883	0.33436	0.0214024	0.0180525
KEGG_PATHWAY	hsa04911:Insulin secretion	12	1.45455	0.00200108	ADCYAP1, ADCYAP1R1, CCKAR, PRKCB, KCNMA1, SLC2A1, ATP1B4, ATP1B3, ADCY2, ADCY1, ATP1B1, ADCY8	325	85	6879	2.98816	0.369165	0.0230125	0.0194105
KEGG_PATHWAY	hsa04970:Salivary secretion	12	1.45455	0.00220053	SLC12A2, PRKCB, KCNMA1, ATP1B4, ATP1B3, ADCY2, SLC4A2, NOS1, ADCY1, ATP1B1, ADCY8, PRKG1	325	86	6879	2.95342	0.397507	0.024101	0.0203287
KEGG_PATHWAY	hsa04728:Dopaminergic synapse	15	1.81818	0.00266764	GRIA1, MAOB, MAOA, PRKCB, CACNA1B, COMT, GRIN2B, GNAI2, GRIN2A, PPP2R2C, KIF5C, KIF5A, GRIA3, GRIA4, KCNJ3	325	128	6879	2.48041	0.459023	0.027889	0.0235238
KEGG_PATHWAY	hsa04720:Long-term potentiation	10	1.21212	0.00352222	GRIA1, GRM5, GRIN2A, PRKCB, CAMK4, ADCY1, ADCY8, GRIN2B, GRIN1, GRIN2D	325	66	6879	3.20699	0.555827	0.0337546	0.0284713
KEGG_PATHWAY	hsa05211:Renal cell carcinoma	10	1.21212	0.00352222	EGLN1, JUN, EGLN3, EGLN2, SLC2A1, PIK3R2, PIK3R1, HIF1A, MET, VEGFA	325	66	6879	3.20699	0.555827	0.0337546	0.0284713
KEGG_PATHWAY	hsa04972:Pancreatic secretion	12	1.45455	0.00409286	SLC12A2, CCKAR, PRKCB, KCNMA1, ATP2A2, ATP1B4, ATP1B3, ADCY2, SLC4A2, ADCY1, ATP1B1, ADCY8	325	93	6879	2.73112	0.610655	0.0376543	0.0317606
KEGG_PATHWAY	hsa04918:Thyroid hormone synthesis	10	1.21212	0.00524988	PRKCB, GPX3, ATP1B4, ATP1B3, ADCY2, ADCY1, ATP1B1, ADCY8, SLC26A4, SLC5A5	325	70	6879	3.02374	0.701997	0.0464412	0.0391722
KEGG_PATHWAY	hsa04080:Neuroactive ligand-receptor interaction	24	2.90909	0.00553273	GRIA1, GABRP, GABRA1, GABRB1, ADCYAP1R1, CHRNB3, CALCRL, GABRA5, GRIK4, GRIK1, GRIK2, GRIN2B, GRIN1, GRIN2D, GLRA1, GRM5, EDNRA, GRIN2A, GRM4, CCKAR, LEPR, F2RL2, GRIA3, GRIA4	325	277	6879	1.83389	0.720866	0.0471307	0.0397537
KEGG_PATHWAY	hsa04510:Focal adhesion	19	2.30303	0.00816466	ITGB1, JUN, ITGA4, SHC1, ROCK2, LAMB2, PRKCB, COL11A1, ACTN1, CAV1, PIK3R2, PIK3R1, MYLK, VEGFA, COL4A6, KDR, FLNC, MET, MYL9	325	206	6879	1.95222	0.848259	0.0644157	0.0543332
KEGG_PATHWAY	hsa04260:Cardiac muscle contraction	10	1.21212	0.00825877	COX8A, CACNB2, COX4I1, ATP1B4, ATP1B3, COX7A2, CACNG2, ATP1B1, COX5B, CACNG3	325	75	6879	2.82215	0.851535	0.0644157	0.0543332
KEGG_PATHWAY	hsa05014:Amyotrophic lateral sclerosis (ALS)	8	0.969697	0.00840205	GRIA1, GRIN2A, NEFL, NEFM, NOS1, GRIN2B, GRIN1, GRIN2D	325	50	6879	3.38658	0.856387	0.0644157	0.0543332
KEGG_PATHWAY	hsa04015:Rap1 signaling pathway	19	2.30303	0.00987919	ITGB1, PRKCB, ADCY2, PIK3R2, ADCY1, PIK3R1, ADCY8, EFNA5, RASGRP2, GRIN2B, GNAI2, GRIN1, VEGFA, GRIN2A, EFNA3, KITLG, KDR, PRKD1, MET	325	210	6879	1.91503	0.898074	0.0732972	0.0618246
KEGG_PATHWAY	hsa05205:Proteoglycans in cancer	18	2.18182	0.0129554	ITGB1, ROCK2, PRKCB, SDC2, CAV1, IGF2, PIK3R2, PIK3R1, HSPG2, HIF1A, DCN, VEGFA, KDR, FLNC, EZR, MET, WNT3, HBEGF	325	200	6879	1.90495	0.950173	0.0931167	0.0785419
KEGG_PATHWAY	hsa04976:Bile secretion	9	1.09091	0.0151777	SLC2A1, ATP1B4, ATP1B3, ADCY2, SLC4A2, ADCY1, ATP1B1, ADCY8, AQP1	325	69	6879	2.7608	0.970331	0.10386	0.0876038
KEGG_PATHWAY	hsa04923:Regulation of lipolysis in adipocytes	8	0.969697	0.0153532	NPY, PIK3R2, ADCY2, ADCY1, PIK3R1, ADCY8, PRKG1, GNAI2	325	56	6879	3.02374	0.971522	0.10386	0.0876038
KEGG_PATHWAY	hsa04915:Estrogen signaling pathway	11	1.33333	0.0176604	JUN, HSPA1L, SHC1, PIK3R2, ADCY2, ADCY1, PIK3R1, ADCY8, KCNJ3, GNAI2, HBEGF	325	99	6879	2.35179	0.983397	0.116054	0.0978888
KEGG_PATHWAY	hsa04014:Ras signaling pathway	19	2.30303	0.0196958	KSR1, SHC1, PRKCB, RASGRF2, PIK3R2, PIK3R1, EFNA5, RASGRP2, GRIN2B, GRIN1, PLD2, VEGFA, GRIN2A, EFNA3, KITLG, RASA4, KDR, RGL1, MET	325	226	6879	1.77946	0.989696	0.125834	0.106138
KEGG_PATHWAY	hsa04964:Proximal tubule bicarbonate reclamation	5	0.606061	0.0210361	ATP1B4, ATP1B3, ATP1B1, SLC38A3, AQP1	325	23	6879	4.60134	0.992478	0.130765	0.110298
KEGG_PATHWAY	hsa04974:Protein digestion and absorption	10	1.21212	0.0221059	SLC8A3, COL11A1, KCNJ13, COL12A1, SLC1A1, COL4A6, ATP1B4, ATP1B3, ATP1B1, SLC8A1	325	88	6879	2.40524	0.99415	0.133799	0.112856
KEGG_PATHWAY	hsa05010:Alzheimer's disease	15	1.81818	0.026676	COX8A, LRP1, NDUFA4, COX4I1, ADAM10, ATP2A2, COX7A2, COX5B, GRIN2B, GRIN1, GRIN2D, GRIN2A, MAPT, NOS1, APOE	325	168	6879	1.88984	0.998008	0.15732	0.132696
KEGG_PATHWAY	hsa00330:Arginine and proline metabolism	7	0.848485	0.0289059	MAOB, P4HA1, MAOA, CKB, NOS1, PRODH, SAT1	325	50	6879	2.96326	0.998825	0.159118	0.134213
KEGG_PATHWAY	hsa04261:Adrenergic signaling in cardiomyocytes	13	1.57576	0.0289673	CREM, ATP1B4, ATP1B3, ADCY2, ADCY1, ATP1B1, ADCY8, GNAI2, CACNB2, PPP2R2C, CACNG2, CACNG3, SCN4B	325	138	6879	1.99391	0.998842	0.159118	0.134213
KEGG_PATHWAY	hsa04010:MAPK signaling pathway	20	2.42424	0.0290564	PTPRR, JUN, MEF2C, HSPA1L, PRKCB, DUSP1, RASGRF2, CACNA1B, HSPB1, ARRB1, RASGRP2, CACNA1E, DUSP6, CACNB2, MKNK2, MAP3K8, MAPT, FLNC, CACNG2, CACNG3	325	253	6879	1.67321	0.998866	0.159118	0.134213
KEGG_PATHWAY	hsa05200:Pathways in cancer	28	3.39394	0.0298314	ITGB1, ROCK2, SLC2A1, CXCR4, ADCY2, PIK3R2, ADCY1, PIK3R1, ADCY8, RASGRP2, HIF1A, GNAI2, EDNRA, WNT3, EGLN1, TCF7L2, JUN, EGLN3, EGLN2, LAMB2, PRKCB, PTCH2, AXIN2, VEGFA, KITLG, CXCL12, COL4A6, MET	325	393	6879	1.50802	0.999056	0.159564	0.134588
KEGG_PATHWAY	hsa04725:Cholinergic synapse	11	1.33333	0.0357556	PRKCB, CAMK4, CACNA1B, PIK3R2, ADCY2, KCNQ5, ADCY1, PIK3R1, ADCY8, KCNJ3, GNAI2	325	111	6879	2.09755	0.999769	0.186904	0.15765
KEGG_PATHWAY	hsa04750:Inflammatory mediator regulation of TRP channels	10	1.21212	0.0406134	TRPA1, PRKCB, PRKCE, PIK3R2, PRKCQ, ADCY2, ADCY1, PIK3R1, ADCY8, ASIC1	325	98	6879	2.15981	0.999928	0.20758	0.175089
KEGG_PATHWAY	hsa04611:Platelet activation	12	1.45455	0.0421987	ITGB1, ROCK2, COL11A1, PIK3R2, ADCY2, ADCY1, PIK3R1, ADCY8, RASGRP2, PRKG1, GNAI2, MYLK	325	130	6879	1.9538	0.999951	0.210993	0.177968
KEGG_PATHWAY	hsa04666:Fc gamma R-mediated phagocytosis	9	1.09091	0.0433554	GSN, NCF1, PRKCB, PRKCE, PIK3R2, PIK3R1, PLPP3, PLPP1, PLD2	325	84	6879	2.2678	0.999963	0.212165	0.178956
KEGG_PATHWAY	hsa04062:Chemokine signaling pathway	15	1.81818	0.0553235	NCF1, CCL21, SHC1, ROCK2, CXCR4, ADCY2, PIK3R2, ARRB1, ADCY1, PIK3R1, ADCY8, RASGRP2, GNAI2, CXCL12, CCR9	325	186	6879	1.70695	0.999998	0.265092	0.223599
KEGG_PATHWAY	hsa04730:Long-term depression	7	0.848485	0.0618944	GRIA1, PRKCB, CRH, NOS1, PRKG1, GRIA3, GNAI2	325	60	6879	2.46938	1	0.290525	0.245051
KEGG_PATHWAY	hsa04930:Type II diabetes mellitus	6	0.727273	0.0737499	PRKCE, CACNA1B, PIK3R2, SLC2A4, PIK3R1, CACNA1E	325	48	6879	2.64577	1	0.339249	0.28615
KEGG_PATHWAY	hsa04924:Renin secretion	7	0.848485	0.0795313	ADCYAP1, ADCYAP1R1, EDNRA, PDE1C, KCNMA1, GNAI2, AQP1	325	64	6879	2.31505	1	0.351773	0.296713
KEGG_PATHWAY	hsa05230:Central carbon metabolism in cancer	7	0.848485	0.0795313	SLC2A1, PIK3R2, PIK3R1, SLC16A3, HIF1A, MET, PFKP	325	64	6879	2.31505	1	0.351773	0.296713
KEGG_PATHWAY	hsa04925:Aldosterone synthesis and secretion	8	0.969697	0.0860913	CAMK1D, PRKCB, PRKCE, CAMK4, ADCY2, PRKD1, ADCY1, ADCY8	325	81	6879	2.09048	1	0.373604	0.315127
KEGG_PATHWAY	hsa00430:Taurine and hypotaurine metabolism	3	0.363636	0.0918701	GAD1, GAD2, CDO1	325	11	6879	5.77259	1	0.391298	0.330052
KEGG_PATHWAY	hsa00010:Glycolysis / Gluconeogenesis	7	0.848485	0.0944257	GPI, MINPP1, LDHA, PGK1, ENO1, ALDOA, PFKP	325	67	6879	2.21139	1	0.394871	0.333065
KEGG_PATHWAY	hsa05414:Dilated cardiomyopathy	8	0.969697	0.0998291	ITGB1, CACNB2, ITGA4, ADCY2, ADCY1, CACNG2, ADCY8, CACNG3	325	84	6879	2.01582	1	0.410013	0.345837

## Sheet: Gill up KEGG
Category	KEGG ID and Term Description	Count	%	p-value	Genes	List Total	Pop Hits	Pop Total	Fold Enrichment	Bonferroni	Benjamini	FDR
KEGG_PATHWAY	hsa00010:Glycolysis / Gluconeogenesis	12	3.78549	1.65258e-07	LDHA, PFKL, PKM, TPI1, PGK1, ALDOC, ALDOB, ENO1, ALDOA, PGM1, PFKP, PCK2	151	67	6879	8.15934	3.48688e-05	3.48694e-05	3.27211e-05
KEGG_PATHWAY	hsa05230:Central carbon metabolism in cancer	11	3.47003	9.94238e-07	PFKL, PKM, MYC, SLC2A1, PIK3R3, MAPK1, HIF1A, SLC16A3, EGFR, FGFR2, PFKP	151	64	6879	7.82999	0.000209762	0.000104892	9.84296e-05
KEGG_PATHWAY	hsa01230:Biosynthesis of amino acids	11	3.47003	3.03152e-06	PFKL, PKM, TPI1, PGK1, ACO1, ALDOC, ALDOB, ENO1, ALDOA, GLUL, PFKP	151	72	6879	6.95999	0.000639446	0.000213217	0.00020008
KEGG_PATHWAY	hsa00051:Fructose and mannose metabolism	8	2.52366	4.34103e-06	PFKFB4, PFKL, TPI1, PMM1, ALDOC, ALDOB, ALDOA, PFKP	151	32	6879	11.3891	0.00091554	0.000228989	0.000214881
KEGG_PATHWAY	hsa01130:Biosynthesis of antibiotics	17	5.36278	1.33307e-05	TPI1, GLDC, ODC1, ENO1, ZMPSTE24, LDHA, PFKL, PKM, NME7, PGK1, ALDOC, ACO1, ALDOB, ALDOA, PGM1, PFKP, PCK2	151	212	6879	3.6531	0.00280885	0.000562556	0.000527896
KEGG_PATHWAY	hsa04066:HIF-1 signaling pathway	11	3.47003	4.07689e-05	EGLN1, EGLN3, EGLN2, MKNK2, SLC2A1, PIK3R3, MAPK1, ENO1, HIF1A, EGFR, VEGFA	151	96	6879	5.21999	0.00856552	0.00143371	0.00134537
KEGG_PATHWAY	hsa05211:Renal cell carcinoma	9	2.83912	8.34828e-05	EGLN1, EGLN3, EGLN2, TGFB3, SLC2A1, PIK3R3, MAPK1, HIF1A, VEGFA	151	66	6879	6.21222	0.0174614	0.00251641	0.00236137
KEGG_PATHWAY	hsa01200:Carbon metabolism	11	3.47003	0.000163535	PFKL, PKM, TPI1, GLDC, PGK1, ACO1, ALDOC, ALDOB, ENO1, ALDOA, PFKP	151	113	6879	4.43468	0.0339201	0.00431323	0.00404749
KEGG_PATHWAY	hsa00030:Pentose phosphate pathway	6	1.89274	0.000358823	PFKL, ALDOC, ALDOB, ALDOA, PGM1, PFKP	151	29	6879	9.42544	0.0729292	0.00841242	0.00789412
KEGG_PATHWAY	hsa01100:Metabolic pathways	44	13.8801	0.000569948	ALAS1, GLDC, COX4I1, ODC1, CPOX, PYGM, ENO1, NT5C2, ADO, COX5B, ABO, CYP26B1, LDHA, PTDSS1, PNP, NMRK2, B3GALT2, HYAL4, PGK1, UPP1, GLUL, PGM1, PCK2, HSD3B7, TPI1, PMM1, NDUFA4, PLA2G4C, PFKL, PKM, P4HA1, BDH1, NME7, B3GNT5, CYP1A1, UPRT, ALDOC, ACO1, ALDOB, HPRT1, CDO1, ALDOA, PFKP, CERS2	151	1219	6879	1.64436	0.11334	0.0120259	0.011285
KEGG_PATHWAY	hsa00230:Purine metabolism	12	3.78549	0.00153536	PKM, PNP, PDE10A, NME7, PDE4D, PDE3B, PDE4B, HPRT1, NT5C2, PDE7A, PDE8A, PGM1	151	176	6879	3.10611	0.276901	0.0294509	0.0276364
KEGG_PATHWAY	hsa05200:Pathways in cancer	19	5.99369	0.00212808	EGLN1, EGLN3, EGLN2, TGFB3, ZBTB16, NCOA4, SLC2A1, PIK3R3, HIF1A, EGFR, VEGFA, CXCL12, MYC, MDM2, COL4A6, AGTR1, MAPK1, PPARG, FGFR2	151	393	6879	2.20247	0.362055	0.0374187	0.0351133
KEGG_PATHWAY	hsa04152:AMPK signaling pathway	9	2.83912	0.00527198	GYS1, PFKFB4, PFKL, EEF2K, PIK3R3, IRS2, PPARG, PFKP, PCK2	151	123	6879	3.33339	0.672193	0.0855684	0.0802964
KEGG_PATHWAY	hsa04922:Glucagon signaling pathway	8	2.52366	0.00568841	GYS1, LDHA, PKM, PDE3B, SLC2A1, PYGM, SIK2, PCK2	151	99	6879	3.68132	0.699912	0.0857324	0.0804503
KEGG_PATHWAY	hsa04068:FoxO signaling pathway	9	2.83912	0.00873316	GABARAPL1, BCL2L11, TGFB3, MDM2, PIK3R3, MAPK1, IRS2, EGFR, PCK2	151	134	6879	3.05975	0.842887	0.122846	0.115278
KEGG_PATHWAY	hsa04910:Insulin signaling pathway	9	2.83912	0.0103413	GYS1, PDE3B, PPP1R3D, MKNK2, PIK3R3, MAPK1, IRS2, PYGM, PCK2	151	138	6879	2.97106	0.888459	0.136375	0.127973
KEGG_PATHWAY	hsa05219:Bladder cancer	5	1.57729	0.0117612	MYC, MDM2, MAPK1, EGFR, VEGFA	151	41	6879	5.55565	0.917613	0.145978	0.136984
KEGG_PATHWAY	hsa04964:Proximal tubule bicarbonate reclamation	4	1.26183	0.0130712	SLC25A10, SLC38A3, SLC4A4, PCK2	151	23	6879	7.92283	0.937725	0.153223	0.143783
KEGG_PATHWAY	hsa05216:Thyroid cancer	4	1.26183	0.0245312	MYC, NCOA4, MAPK1, PPARG	151	29	6879	6.28363	0.994703	0.272425	0.255641
KEGG_PATHWAY	hsa03018:RNA degradation	6	1.89274	0.0259499	PFKL, BTG1, ENO1, PABPC1, TOB1, PFKP	151	77	6879	3.54984	0.996104	0.273772	0.256904
KEGG_PATHWAY	hsa04931:Insulin resistance	7	2.2082	0.0302078	GYS1, PPP1R3D, SLC2A1, PIK3R3, IRS2, PYGM, PCK2	151	108	6879	2.95272	0.998454	0.303516	0.284816
KEGG_PATHWAY	hsa04151:PI3K-Akt signaling pathway	14	4.4164	0.0375824	PIK3R3, EGFR, VEGFA, EFNA1, GYS1, BCL2L11, MYC, DDIT4, MDM2, COL4A6, MAPK1, FGFR2, MCL1, PCK2	151	345	6879	1.84866	0.999691	0.360449	0.338241
KEGG_PATHWAY	hsa04919:Thyroid hormone signaling pathway	7	2.2082	0.0393074	MYC, MDM2, SLC2A1, DIO3, PIK3R3, MAPK1, HIF1A	151	115	6879	2.77299	0.999788	0.360603	0.338386
KEGG_PATHWAY	hsa05032:Morphine addiction	6	1.89274	0.048099	PDE10A, PDE4D, PDE3B, PDE4B, PDE7A, PDE8A	151	91	6879	3.00371	0.99997	0.42287	0.396817
KEGG_PATHWAY	hsa05212:Pancreatic cancer	5	1.57729	0.0528324	TGFB3, PIK3R3, MAPK1, EGFR, VEGFA	151	65	6879	3.50433	0.999989	0.445906	0.418433
KEGG_PATHWAY	hsa05205:Proteoglycans in cancer	9	2.83912	0.0704384	MYC, MDM2, PLAUR, IGF2, PIK3R3, MAPK1, HIF1A, EGFR, VEGFA	151	200	6879	2.05003	1	0.559497	0.525026
KEGG_PATHWAY	hsa05220:Chronic myeloid leukemia	5	1.57729	0.0715944	TGFB3, MYC, MDM2, PIK3R3, MAPK1	151	72	6879	3.16363	1	0.559497	0.525026
KEGG_PATHWAY	hsa04930:Type II diabetes mellitus	4	1.26183	0.0863885	PKM, PIK3R3, MAPK1, IRS2	151	48	6879	3.79636	1	0.650999	0.61089
KEGG_PATHWAY	hsa04514:Cell adhesion molecules (CAMs)	7	2.2082	0.089548	VCAM1, SELPLG, SDC3, NCAM1, NECTIN3, CD22, NECTIN1	151	142	6879	2.24573	1	0.651539	0.611397
KEGG_PATHWAY	hsa05206:MicroRNAs in cancer	11	3.47003	0.0942834	ST14, BCL2L11, MYC, DDIT4, MDM2, CYP1B1, IRS2, VIM, EGFR, MCL1, VEGFA	151	286	6879	1.75217	1	0.663126	0.62227

## Sheet: HK up KEGG
Category	KEGG ID and Term Description	Count	%	p-value	Genes	List Total	Pop Hits	Pop Total	Fold Enrichment	Bonferroni	Benjamini	FDR
KEGG_PATHWAY	hsa00010:Glycolysis / Gluconeogenesis	10	3.69004	8.16161e-06	GPI, LDHA, PKM, GAPDHS, PGK1, ALDOC, ENO1, PCK1, ALDOA, ACSS1	143	67	6879	7.17984	0.00164729	0.00164865	0.00150174
KEGG_PATHWAY	hsa04152:AMPK signaling pathway	12	4.42804	4.20145e-05	GYS2, GYS1, PPP2CB, PFKFB4, EEF2K, CREB3L3, CAB39L, SCD, INSR, PRKAG2, IRS2, PCK1	143	123	6879	4.69316	0.00845119	0.00424346	0.00386533
KEGG_PATHWAY	hsa04931:Insulin resistance	11	4.05904	7.05745e-05	GYS2, GYS1, PPP1R3C, CREB3L3, INSR, PPP1R3D, SLC2A1, SLC27A6, PRKAG2, IRS2, PCK1	143	108	6879	4.89957	0.0141554	0.00475201	0.00432857
KEGG_PATHWAY	hsa04066:HIF-1 signaling pathway	10	3.69004	0.000149035	EGLN1, EGLN3, CDKN1B, NOS2, INSR, MKNK2, SLC2A1, ENO1, HIF1A, VEGFA	143	96	6879	5.01093	0.0296586	0.00752626	0.0068556
KEGG_PATHWAY	hsa04922:Glucagon signaling pathway	10	3.69004	0.000188824	GYS2, GYS1, ATF2, LDHA, PKM, CREB3L3, SLC2A1, PRKAG2, SIK2, PCK1	143	99	6879	4.85908	0.0374276	0.00762847	0.00694871
KEGG_PATHWAY	hsa01200:Carbon metabolism	10	3.69004	0.000510112	GPI, PKM, PC, GLDC, PGK1, ACO1, ALDOC, ENO1, ALDOA, ACSS1	143	113	6879	4.25707	0.0979353	0.0153633	0.0139943
KEGG_PATHWAY	hsa04910:Insulin signaling pathway	11	4.05904	0.000532392	GYS2, GYS1, PPP1R3C, INSR, PPP1R3D, MKNK2, INPPL1, PRKAG2, FLOT2, IRS2, PCK1	143	138	6879	3.83445	0.101988	0.0153633	0.0139943
KEGG_PATHWAY	hsa04151:PI3K-Akt signaling pathway	18	6.64207	0.000698107	ATF2, HSP90AA1, CDKN1B, HGF, INSR, VEGFA, GYS2, PPP2CB, GYS1, CREB3L3, DDIT4, MDM2, KDR, PCK1, ITGA9, JAK1, MCL1, BCL2L1	143	345	6879	2.50982	0.131569	0.0176272	0.0160565
KEGG_PATHWAY	hsa01130:Biosynthesis of antibiotics	13	4.79705	0.00137839	GPI, GLDC, ODC1, ENO1, LDHA, PKM, PGK1, ALDOC, ACO1, ALDOA, PCK1, ACSS1, PRODH	143	212	6879	2.94983	0.243178	0.0309372	0.0281804
KEGG_PATHWAY	hsa05211:Renal cell carcinoma	7	2.58303	0.00228619	EGLN1, JUN, EGLN3, HGF, SLC2A1, HIF1A, VEGFA	143	66	6879	5.10203	0.370192	0.0461811	0.042066
KEGG_PATHWAY	hsa05200:Pathways in cancer	18	6.64207	0.00287143	FZD1, EGLN1, JUN, EGLN3, HSP90AA1, CDKN1B, NOS2, HGF, NCOA4, SLC2A1, HIF1A, GNAI1, GNAI2, NFKB2, VEGFA, MDM2, JAK1, BCL2L1	143	393	6879	2.20328	0.440585	0.05273	0.0480313
KEGG_PATHWAY	hsa05030:Cocaine addiction	6	2.21402	0.00320997	GPSM1, ATF2, JUN, CREB3L3, GNAI1, GNAI2	143	49	6879	5.8904	0.47767	0.0540344	0.0492195
KEGG_PATHWAY	hsa01230:Biosynthesis of amino acids	7	2.58303	0.00355419	PKM, PC, PGK1, ACO1, ALDOC, ENO1, ALDOA	143	72	6879	4.67686	0.51287	0.0552266	0.0503054
KEGG_PATHWAY	hsa04068:FoxO signaling pathway	9	3.32103	0.00634004	GABARAPL1, CDKN1B, CCNG2, INSR, MDM2, PRKAG2, IRS2, PCK1, GADD45G	143	134	6879	3.23093	0.723284	0.0914777	0.0833262
KEGG_PATHWAY	hsa00620:Pyruvate metabolism	5	1.84502	0.00894058	LDHA, PKM, PC, PCK1, ACSS1	143	40	6879	6.01311	0.837018	0.1204	0.109671
KEGG_PATHWAY	hsa05203:Viral carcinogenesis	11	4.05904	0.00966524	ATF2, JUN, CDKN1B, PKM, SCIN, CREB3L3, PXN, MDM2, REL, JAK1, NFKB2	143	205	6879	2.58124	0.859405	0.122024	0.11115
KEGG_PATHWAY	hsa04964:Proximal tubule bicarbonate reclamation	4	1.47601	0.0112708	SLC25A10, ATP1B1, PCK1, SLC38A3	143	23	6879	8.36607	0.898697	0.133924	0.12199
KEGG_PATHWAY	hsa05169:Epstein-Barr virus infection	8	2.95203	0.0128502	JUN, CDKN1B, NEDD4, MDM2, TNFAIP3, RELB, JAK1, NFKB2	143	122	6879	3.15442	0.926653	0.144208	0.131357
KEGG_PATHWAY	hsa04915:Estrogen signaling pathway	7	2.58303	0.0162346	ATF2, HSP90AA1, JUN, HSPA1L, CREB3L3, GNAI1, GNAI2	143	99	6879	3.40136	0.963349	0.1726	0.15722
KEGG_PATHWAY	hsa00330:Arginine and proline metabolism	5	1.84502	0.0192408	CKMT2, P4HA1, NOS2, ODC1, PRODH	143	50	6879	4.81049	0.980248	0.194332	0.177015
KEGG_PATHWAY	hsa05100:Bacterial invasion of epithelial cells	6	2.21402	0.0221261	SEPT9, PXN, ARPC5L, VCL, ACTB, ACTG1	143	78	6879	3.70038	0.989107	0.201369	0.183425
KEGG_PATHWAY	hsa05205:Proteoglycans in cancer	10	3.69004	0.0222591	FZD1, SDC4, HGF, PXN, MDM2, KDR, HIF1A, ACTB, ACTG1, VEGFA	143	200	6879	2.40524	0.989403	0.201369	0.183425
KEGG_PATHWAY	hsa04668:TNF signaling pathway	7	2.58303	0.0229281	ATF2, CEBPB, JUN, JAG1, CREB3L3, TNFAIP3, CXCL2	143	107	6879	3.14705	0.990771	0.201369	0.183425
KEGG_PATHWAY	hsa04710:Circadian rhythm	4	1.47601	0.0253858	PER2, BHLHE40, PRKAG2, NR1D1	143	31	6879	6.20708	0.994451	0.209953	0.191244
KEGG_PATHWAY	hsa05164:Influenza A	9	3.32103	0.027186	IVNS1ABP, DNAJB1, ATF2, JUN, HSPA1L, EIF2AK3, ACTB, JAK1, ACTG1	143	174	6879	2.48818	0.99618	0.209953	0.191244
KEGG_PATHWAY	hsa00051:Fructose and mannose metabolism	4	1.47601	0.0275987	PFKFB4, PMM1, ALDOC, ALDOA	143	32	6879	6.01311	0.996494	0.209953	0.191244
KEGG_PATHWAY	hsa05132:Salmonella infection	6	2.21402	0.028063	JUN, NOS2, ARPC5L, CXCL2, ACTB, ACTG1	143	83	6879	3.47746	0.996817	0.209953	0.191244
KEGG_PATHWAY	hsa04670:Leukocyte transendothelial migration	7	2.58303	0.031272	OCLN, PXN, GNAI1, VCL, ACTB, GNAI2, ACTG1	143	115	6879	2.92812	0.998368	0.217825	0.198415
KEGG_PATHWAY	hsa04919:Thyroid hormone signaling pathway	7	2.58303	0.031272	MDM2, SLC2A1, SLC16A10, ATP1B1, HIF1A, ACTB, ACTG1	143	115	6879	2.92812	0.998368	0.217825	0.198415
KEGG_PATHWAY	hsa01100:Metabolic pathways	34	12.5461	0.0551341	IPPK, GPI, GLDC, ODC1, CPOX, ENO1, MTMR4, ADO, CKMT2, UGCG, CYP26B1, LDHA, PGK1, RIMKLA, PCK1, ACSS1, PRODH, CBR1, PCYT2, NOS2, PMM1, PKM, PC, CYP24A1, P4HA1, BDH1, B3GNT5, GAPDHS, UPRT, ALDOC, ACO1, LPIN1, CDO1, ALDOA	143	1219	6879	1.34173	0.999989	0.371236	0.338156
KEGG_PATHWAY	hsa05202:Transcriptional misregulation in cancer	8	2.95203	0.0570273	PER2, CEBPB, HHEX, CDKN1B, TFE3, MDM2, REL, BCL2L1	143	167	6879	2.30443	0.999993	0.371597	0.338485
KEGG_PATHWAY	hsa04510:Focal adhesion	9	3.32103	0.0626293	JUN, HGF, PXN, KDR, VCL, ACTB, ITGA9, ACTG1, VEGFA	143	206	6879	2.10167	0.999998	0.395347	0.360118
KEGG_PATHWAY	hsa04261:Adrenergic signaling in cardiomyocytes	7	2.58303	0.0654391	ATF2, PPP2CB, CREB3L3, CREM, ATP1B1, GNAI1, GNAI2	143	138	6879	2.4401	0.999999	0.400567	0.364873
KEGG_PATHWAY	hsa05133:Pertussis	5	1.84502	0.0687874	JUN, NOS2, IRF1, GNAI1, GNAI2	143	75	6879	3.20699	0.999999	0.408678	0.372261
KEGG_PATHWAY	hsa05145:Toxoplasmosis	6	2.21402	0.0766938	HSPA1L, NOS2, GNAI1, GNAI2, JAK1, BCL2L1	143	110	6879	2.6239	1	0.435492	0.396685
KEGG_PATHWAY	hsa04010:MAPK signaling pathway	10	3.69004	0.0776124	ATF2, JUN, JUND, HSPA1L, DUSP1, MKNK2, DUSP8, GADD45G, RELB, NFKB2	143	253	6879	1.90138	1	0.435492	0.396685
KEGG_PATHWAY	hsa05130:Pathogenic Escherichia coli infection	4	1.47601	0.0876383	OCLN, ARPC5L, ACTB, ACTG1	143	51	6879	3.77293	1	0.476018	0.433601
KEGG_PATHWAY	hsa04921:Oxytocin signaling pathway	7	2.58303	0.089548	JUN, EEF2K, PRKAG2, GNAI1, ACTB, GNAI2, ACTG1	143	150	6879	2.2449	1	0.476018	0.433601
KEGG_PATHWAY	hsa05134:Legionellosis	4	1.47601	0.0999348	RAB1A, HSPA1L, CXCL2, NFKB2	143	54	6879	3.56333	1	0.517611	0.471487

## Sheet: Liver up KEGG
Category	KEGG ID and Term Description	Count	%	p-value	Genes	List Total	Pop Hits	Pop Total	Fold Enrichment	Bonferroni	Benjamini	FDR
KEGG_PATHWAY	hsa04152:AMPK signaling pathway	17	5.02959	8.72001e-08	SREBF1, CRTC2, PFKFB4, CAB39L, INSR, PRKAG2, IRS2, FOXO1, GYS2, PPP2CB, GYS1, EEF2K, CREB3L3, SCD, PPARG, PCK1, CREB5	179	123	6879	5.31149	1.81375e-05	9.66012e-06	8.31328e-06
KEGG_PATHWAY	hsa04931:Insulin resistance	16	4.73373	9.28858e-08	SREBF1, CRTC2, INSR, SLC2A1, PRKAG2, IRS2, FOXO1, GYS2, NFKBIA, GYS1, PPP1R3C, CREB3L3, SLC27A6, PCK1, PPARGC1B, CREB5	179	108	6879	5.69336	1.93201e-05	9.66012e-06	8.31328e-06
KEGG_PATHWAY	hsa04922:Glucagon signaling pathway	13	3.84615	8.09147e-06	ATF2, CRTC2, SLC2A1, PRKAG2, FOXO1, GYS2, GYS1, LDHA, PKM, CREB3L3, SIK2, PCK1, CREB5	179	99	6879	5.04639	0.00168162	0.000561009	0.000482791
KEGG_PATHWAY	hsa00010:Glycolysis / Gluconeogenesis	10	2.95858	4.98872e-05	GPI, LDHA, PKM, ACSS2, GAPDHS, ALDOC, ENO1, PCK1, ALDOA, ACSS1	179	67	6879	5.73585	0.0103231	0.00259414	0.00223245
KEGG_PATHWAY	hsa04066:HIF-1 signaling pathway	11	3.25444	0.00017191	EGLN1, EGLN3, CDKN1B, NOS2, INSR, MKNK2, SLC2A1, ENO1, HIF1A, EGFR, VEGFA	179	96	6879	4.40346	0.0351285	0.00633014	0.00544757
KEGG_PATHWAY	hsa05200:Pathways in cancer	24	7.10059	0.0001826	FZD1, EGLN1, JUN, EGLN3, HSP90AA1, CDKN1B, NOS2, HGF, NCOA4, SLC2A1, HIF1A, FOXO1, EGFR, GNAI1, GNAI2, NFKB2, CRKL, VEGFA, NFKBIA, MDM2, BAX, PPARG, JAK1, BCL2L1	179	393	6879	2.34688	0.037272	0.00633014	0.00544757
KEGG_PATHWAY	hsa04910:Insulin signaling pathway	13	3.84615	0.000221622	SREBF1, INSR, INPPL1, PRKAG2, IRS2, FOXO1, CRKL, GYS2, GYS1, PPP1R3C, MKNK2, FLOT2, PCK1	179	138	6879	3.62023	0.045056	0.00658535	0.0056672
KEGG_PATHWAY	hsa05203:Viral carcinogenesis	16	4.73373	0.000254116	ATF2, HDAC5, JUN, CDKN1B, SRF, PXN, NFKB2, NFKBIA, PKM, SCIN, CREB3L3, MDM2, REL, BAX, JAK1, CREB5	179	205	6879	2.99943	0.0514898	0.006607	0.00568584
KEGG_PATHWAY	hsa04151:PI3K-Akt signaling pathway	21	6.21302	0.000557637	ATF2, HSP90AA1, CRTC2, CDKN1B, HGF, INSR, EGFR, VEGFA, GYS2, PPP2CB, GYS1, CREB3L3, DDIT4, MDM2, KDR, PCK1, ITGA9, JAK1, MCL1, CREB5, BCL2L1	179	345	6879	2.33923	0.109543	0.0128876	0.0110908
KEGG_PATHWAY	hsa04068:FoxO signaling pathway	12	3.5503	0.00066368	GABARAPL1, CDKN1B, CCNG2, INSR, MDM2, FBXO25, PRKAG2, IRS2, PCK1, FOXO1, EGFR, GADD45G	179	134	6879	3.44151	0.128981	0.0138046	0.0118799
KEGG_PATHWAY	hsa04710:Circadian rhythm	6	1.77515	0.00107878	PER2, PER1, BHLHE40, BHLHE41, PRKAG2, NR1D1	179	31	6879	7.4381	0.20109	0.0203987	0.0175547
KEGG_PATHWAY	hsa05211:Renal cell carcinoma	8	2.36686	0.00148356	EGLN1, JUN, EGLN3, HGF, SLC2A1, HIF1A, CRKL, VEGFA	179	66	6879	4.6582	0.26568	0.0245041	0.0210877
KEGG_PATHWAY	hsa05030:Cocaine addiction	7	2.07101	0.00153151	GPSM1, ATF2, JUN, CREB3L3, GNAI1, CREB5, GNAI2	179	49	6879	5.49002	0.272977	0.0245041	0.0210877
KEGG_PATHWAY	hsa04010:MAPK signaling pathway	16	4.73373	0.00223683	ATF2, JUN, MEF2C, JUND, HSPA1L, DUSP1, SRF, DUSP8, DUSP16, EGFR, GADD45G, RELB, NFKB2, CRKL, DDIT3, MKNK2	179	253	6879	2.43037	0.372355	0.032229	0.0277355
KEGG_PATHWAY	hsa05166:HTLV-I infection	16	4.73373	0.00232421	FZD1, ATF2, JUN, CRTC2, SRF, CREM, SLC2A1, RELB, NFKB2, NFKBIA, XPO1, TP53INP1, BAX, ATF3, JAK1, BCL2L1	179	254	6879	2.4208	0.383685	0.032229	0.0277355
KEGG_PATHWAY	hsa04964:Proximal tubule bicarbonate reclamation	5	1.47929	0.00261094	SLC25A10, ATP1B1, PCK1, SLC38A3, GLS	179	23	6879	8.35438	0.419454	0.0339423	0.0292099
KEGG_PATHWAY	hsa01130:Biosynthesis of antibiotics	14	4.14201	0.00326909	GPI, ACSS2, GLDC, ODC1, ENO1, LDHA, PKM, NME7, ALDOC, ACO1, ALDOA, PCK1, ACSS1, PRODH	179	212	6879	2.53784	0.493932	0.0399982	0.0344216
KEGG_PATHWAY	hsa05202:Transcriptional misregulation in cancer	12	3.5503	0.00389869	PER2, MEF2C, CEBPB, HHEX, CDKN1B, DDIT3, TFE3, MDM2, REL, PPARG, FOXO1, BCL2L1	179	167	6879	2.76145	0.556258	0.0433648	0.0373188
KEGG_PATHWAY	hsa04915:Estrogen signaling pathway	9	2.66272	0.00396121	ATF2, HSP90AA1, JUN, HSPA1L, CREB3L3, GNAI1, EGFR, CREB5, GNAI2	179	99	6879	3.49365	0.562014	0.0433648	0.0373188
KEGG_PATHWAY	hsa05169:Epstein-Barr virus infection	10	2.95858	0.00421642	NFKBIA, JUN, CDKN1B, TBK1, NEDD4, MDM2, TNFAIP3, RELB, JAK1, NFKB2	179	122	6879	3.15001	0.584748	0.0438508	0.037737
KEGG_PATHWAY	hsa05164:Influenza A	12	3.5503	0.00531433	IVNS1ABP, NFKBIA, DNAJB1, ATF2, JUN, TBK1, XPO1, HSPA1L, EIF2AK3, ACTB, JAK1, ACTG1	179	174	6879	2.65036	0.669889	0.0526371	0.0452983
KEGG_PATHWAY	hsa05215:Prostate cancer	8	2.36686	0.00752343	NFKBIA, HSP90AA1, CDKN1B, CREB3L3, MDM2, FOXO1, EGFR, CREB5	179	88	6879	3.49365	0.792119	0.0711306	0.0612134
KEGG_PATHWAY	hsa01200:Carbon metabolism	9	2.66272	0.00873022	GPI, PKM, ACSS2, GLDC, ACO1, ALDOC, ENO1, ALDOA, ACSS1	179	113	6879	3.06081	0.838598	0.0789516	0.0679439
KEGG_PATHWAY	hsa04141:Protein processing in endoplasmic reticulum	11	3.25444	0.0120507	ERO1A, DNAJB1, HSP90AA1, HSPA1L, HSPA5, DDIT3, EIF2AK3, BAX, UBE2J2, SEC24D, UBXN6	179	169	6879	2.50137	0.919684	0.10444	0.0898785
KEGG_PATHWAY	hsa05100:Bacterial invasion of epithelial cells	7	2.07101	0.0152163	SEPT9, PXN, ARPC5L, VCL, ACTB, ACTG1, CRKL	179	78	6879	3.44886	0.9588	0.1266	0.108949
KEGG_PATHWAY	hsa00620:Pyruvate metabolism	5	1.47929	0.0191771	LDHA, PKM, ACSS2, PCK1, ACSS1	179	40	6879	4.80377	0.982182	0.153416	0.132027
KEGG_PATHWAY	hsa04668:TNF signaling pathway	8	2.36686	0.0205767	NFKBIA, ATF2, CEBPB, JUN, CREB3L3, TNFAIP3, CXCL2, CREB5	179	107	6879	2.87328	0.986761	0.156578	0.134747
KEGG_PATHWAY	hsa04022:cGMP-PKG signaling pathway	10	2.95858	0.0210778	ATF2, MEF2C, CREB3L3, SRF, INSR, IRS2, ATP1B1, GNAI1, CREB5, GNAI2	179	158	6879	2.43229	0.988098	0.156578	0.134747
KEGG_PATHWAY	hsa05230:Central carbon metabolism in cancer	6	1.77515	0.0244523	PKM, SLC2A1, HIF1A, SLC16A3, EGFR, GLS	179	64	6879	3.60283	0.994197	0.169536	0.145899
KEGG_PATHWAY	hsa05131:Shigellosis	6	1.77515	0.0244523	NFKBIA, ARPC5L, VCL, ACTB, ACTG1, CRKL	179	64	6879	3.60283	0.994197	0.169536	0.145899
KEGG_PATHWAY	hsa04919:Thyroid hormone signaling pathway	8	2.36686	0.0291611	MDM2, SLC2A1, SLC16A10, ATP1B1, HIF1A, FOXO1, ACTB, ACTG1	179	115	6879	2.6734	0.997879	0.195662	0.168382
KEGG_PATHWAY	hsa05161:Hepatitis B	9	2.66272	0.0340313	NFKBIA, ATF2, JUN, CDKN1B, TBK1, CREB3L3, BAX, CREB5, JAK1	179	145	6879	2.38532	0.999255	0.216314	0.186155
KEGG_PATHWAY	hsa05205:Proteoglycans in cancer	11	3.25444	0.034319	FZD1, SDC4, HGF, PXN, MDM2, KDR, HIF1A, EGFR, ACTB, ACTG1, VEGFA	179	200	6879	2.11366	0.9993	0.216314	0.186155
KEGG_PATHWAY	hsa04520:Adherens junction	6	1.77515	0.0361948	INSR, EGFR, VCL, NECTIN2, ACTB, ACTG1	179	71	6879	3.24762	0.999533	0.221427	0.190555
KEGG_PATHWAY	hsa00330:Arginine and proline metabolism	5	1.47929	0.0396602	CKMT2, P4HA1, NOS2, ODC1, PRODH	179	50	6879	3.84302	0.999779	0.229017	0.197087
KEGG_PATHWAY	hsa04921:Oxytocin signaling pathway	9	2.66272	0.0403617	MEF2C, JUN, EEF2K, PRKAG2, GNAI1, EGFR, ACTB, GNAI2, ACTG1	179	150	6879	2.30581	0.99981	0.229017	0.197087
KEGG_PATHWAY	hsa04510:Focal adhesion	11	3.25444	0.0407386	JUN, HGF, PXN, KDR, EGFR, VCL, ACTB, ITGA9, ACTG1, CRKL, VEGFA	179	206	6879	2.0521	0.999825	0.229017	0.197087
KEGG_PATHWAY	hsa04015:Rap1 signaling pathway	11	3.25444	0.04544	PARD6B, HGF, INSR, KDR, GNAI1, EGFR, ACTB, GNAI2, ACTG1, CRKL, VEGFA	179	210	6879	2.01301	0.999937	0.248724	0.214047
KEGG_PATHWAY	hsa00051:Fructose and mannose metabolism	4	1.18343	0.0488112	PFKFB4, PMM1, ALDOC, ALDOA	179	32	6879	4.80377	0.99997	0.260326	0.224031
KEGG_PATHWAY	hsa05134:Legionellosis	5	1.47929	0.0503499	NFKBIA, RAB1A, HSPA1L, CXCL2, NFKB2	179	54	6879	3.55835	0.999978	0.26182	0.225316
KEGG_PATHWAY	hsa05160:Hepatitis C	8	2.36686	0.0565775	NFKBIA, PPP2CB, OCLN, TBK1, IRF1, EIF2AK3, EGFR, JAK1	179	133	6879	2.31159	0.999995	0.280193	0.241128
KEGG_PATHWAY	hsa05162:Measles	8	2.36686	0.0565775	NFKBIA, CDKN1B, TBK1, HSPA1L, CD209, EIF2AK3, TNFAIP3, JAK1	179	133	6879	2.31159	0.999995	0.280193	0.241128
KEGG_PATHWAY	hsa05132:Salmonella infection	6	1.77515	0.063285	JUN, NOS2, ARPC5L, CXCL2, ACTB, ACTG1	179	83	6879	2.77808	0.999999	0.306123	0.263442
KEGG_PATHWAY	hsa05145:Toxoplasmosis	7	2.07101	0.0651133	NFKBIA, HSPA1L, NOS2, GNAI1, GNAI2, JAK1, BCL2L1	179	110	6879	2.44556	0.999999	0.306606	0.263858
KEGG_PATHWAY	hsa04261:Adrenergic signaling in cardiomyocytes	8	2.36686	0.066333	ATF2, PPP2CB, CREB3L3, CREM, ATP1B1, GNAI1, CREB5, GNAI2	179	138	6879	2.22784	0.999999	0.306606	0.263858
KEGG_PATHWAY	hsa04530:Tight junction	6	1.77515	0.0743027	PPP2CB, PARD6B, OCLN, CGN, ACTB, ACTG1	179	87	6879	2.65036	1	0.335977	0.289134
KEGG_PATHWAY	hsa04670:Leukocyte transendothelial migration	7	2.07101	0.0771604	OCLN, PXN, GNAI1, VCL, ACTB, GNAI2, ACTG1	179	115	6879	2.33923	1	0.341476	0.293866
KEGG_PATHWAY	hsa04115:p53 signaling pathway	5	1.47929	0.0947618	CCNG2, MDM2, BAX, PPM1D, GADD45G	179	67	6879	2.86792	1	0.400119	0.344334
KEGG_PATHWAY	hsa03320:PPAR signaling pathway	5	1.47929	0.0947618	SCD, SLC27A6, PPARG, ANGPTL4, PCK1	179	67	6879	2.86792	1	0.400119	0.344334
KEGG_PATHWAY	hsa04932:Non-alcoholic fatty liver disease (NAFLD)	8	2.36686	0.0961826	SREBF1, JUN, DDIT3, INSR, EIF2AK3, BAX, PRKAG2, IRS2	179	151	6879	2.03604	1	0.400119	0.344334

## Sheet: Intestine up KEGG
Category	KEGG ID and Term Description	Count	%	PValue	Genes	List Total	Pop Hits	Pop Total	Fold Enrichment	Bonferroni	Benjamini	FDR
KEGG_PATHWAY	hsa04152:AMPK signaling pathway	12	5.85366	1.14682e-06	GYS1, PFKFB4, PFKL, EEF2K, SCD, INSR, IRS2, PPARG, PCK1, FOXO3, PFKP, PCK2	99	123	6879	6.77901	0.000185768	0.000185785	0.000177757
KEGG_PATHWAY	hsa04068:FoxO signaling pathway	11	5.36585	1.83492e-05	SMAD4, GABARAPL1, CDKN1B, CCNG2, BNIP3, INSR, MDM2, IRS2, PCK1, FOXO3, PCK2	99	134	6879	5.70398	0.00296818	0.00148628	0.00142206
KEGG_PATHWAY	hsa04066:HIF-1 signaling pathway	9	4.39024	6.01849e-05	EGLN1, EGLN3, CDKN1B, EGLN2, INSR, MKNK2, SLC2A1, HIF1A, VEGFA	99	96	6879	6.5142	0.00970287	0.00318418	0.0030466
KEGG_PATHWAY	hsa00051:Fructose and mannose metabolism	6	2.92683	7.86218e-05	PFKFB4, PFKL, PMM1, ALDOC, ALDOA, PFKP	99	32	6879	13.0284	0.0126565	0.00318418	0.0030466
KEGG_PATHWAY	hsa03320:PPAR signaling pathway	7	3.41463	0.000354797	RXRA, SCD, APOA1, PPARG, ANGPTL4, PCK1, PCK2	99	67	6879	7.25961	0.0558661	0.00957952	0.00916559
KEGG_PATHWAY	hsa00010:Glycolysis / Gluconeogenesis	7	3.41463	0.000354797	PFKL, ALDOC, PCK1, ALDOA, PGM1, PFKP, PCK2	99	67	6879	7.25961	0.0558661	0.00957952	0.00916559
KEGG_PATHWAY	hsa00030:Pentose phosphate pathway	5	2.43902	0.000699911	PFKL, ALDOC, ALDOA, PGM1, PFKP	99	29	6879	11.9801	0.107229	0.0161979	0.015498
KEGG_PATHWAY	hsa04151:PI3K-Akt signaling pathway	14	6.82927	0.00113481	ATF2, CDKN1B, COL24A1, INSR, FOXO3, VEGFA, EFNA1, GYS1, RXRA, DDIT4, MDM2, PCK1, MCL1, PCK2	99	345	6879	2.81968	0.168017	0.0229799	0.0219869
KEGG_PATHWAY	hsa05211:Renal cell carcinoma	6	2.92683	0.00238195	EGLN1, EGLN3, EGLN2, SLC2A1, HIF1A, VEGFA	99	66	6879	6.3168	0.320458	0.0428751	0.0410225
KEGG_PATHWAY	hsa04931:Insulin resistance	7	3.41463	0.00426217	GYS1, INSR, PPP1R3D, SLC2A1, IRS2, PCK1, PCK2	99	108	6879	4.50365	0.4994	0.0690472	0.0660637
KEGG_PATHWAY	hsa05200:Pathways in cancer	13	6.34146	0.00959034	EGLN1, EGLN3, SMAD4, CDKN1B, EGLN2, NCOA4, SLC2A1, AXIN1, HIF1A, VEGFA, RXRA, MDM2, PPARG	99	393	6879	2.29848	0.790102	0.140758	0.134676
KEGG_PATHWAY	hsa01130:Biosynthesis of antibiotics	9	4.39024	0.0104265	PFKL, NME7, OGDH, ALDOC, PCK1, ALDOA, PGM1, PFKP, PCK2	99	212	6879	2.94983	0.816944	0.140758	0.134676
KEGG_PATHWAY	hsa05230:Central carbon metabolism in cancer	5	2.43902	0.0128181	PFKL, SLC2A1, HIF1A, SLC16A3, PFKP	99	64	6879	5.4285	0.876308	0.147137	0.140779
KEGG_PATHWAY	hsa04922:Glucagon signaling pathway	6	2.92683	0.013204	GYS1, ATF2, SLC2A1, SIK2, PCK1, PCK2	99	99	6879	4.2112	0.883899	0.147137	0.140779
KEGG_PATHWAY	hsa04910:Insulin signaling pathway	7	3.41463	0.0136238	GYS1, INSR, PPP1R3D, MKNK2, IRS2, PCK1, PCK2	99	138	6879	3.52459	0.891632	0.147137	0.140779
KEGG_PATHWAY	hsa04920:Adipocytokine signaling pathway	5	2.43902	0.0173438	RXRA, SLC2A1, IRS2, PCK1, PCK2	99	70	6879	4.9632	0.941243	0.175606	0.168018
KEGG_PATHWAY	hsa03018:RNA degradation	5	2.43902	0.0237505	BTG3, PFKL, BTG1, TOB1, PFKP	99	77	6879	4.512	0.979637	0.226329	0.216549
KEGG_PATHWAY	hsa05216:Thyroid cancer	3	1.46341	0.0636001	RXRA, NCOA4, PPARG	99	29	6879	7.18809	0.999976	0.546974	0.523339
KEGG_PATHWAY	hsa00052:Galactose metabolism	3	1.46341	0.0675276	PFKL, PGM1, PFKP	99	30	6879	6.94848	0.999988	0.546974	0.523339
KEGG_PATHWAY	hsa00020:Citrate cycle (TCA cycle)	3	1.46341	0.0675276	OGDH, PCK1, PCK2	99	30	6879	6.94848	0.999988	0.546974	0.523339
KEGG_PATHWAY	hsa01200:Carbon metabolism	5	2.43902	0.0771724	PFKL, OGDH, ALDOC, ALDOA, PFKP	99	113	6879	3.07455	0.999998	0.583126	0.557929
KEGG_PATHWAY	hsa04919:Thyroid hormone signaling pathway	5	2.43902	0.0811401	RXRA, MDM2, SLC2A1, SLC16A10, HIF1A	99	115	6879	3.02108	0.999999	0.583126	0.557929
KEGG_PATHWAY	hsa01230:Biosynthesis of amino acids	4	1.95122	0.0827895	PFKL, ALDOC, ALDOA, PFKP	99	72	6879	3.86027	0.999999	0.583126	0.557929
