# Supplementary material for: Comparative Transcriptome Analysis of Organ-Specific Adaptive Responses to Hypoxia Provides Insights to Human Diseases
Source: Genes (Basel). 2022 Jun 19;13(6):1096. doi: 10.3390/genes13061096 (PMC9222487; doi:10.3390/genes13061096)
Supplement: Supplementary file 1 [file genes-13-01096-s001.zip › Table S9.xlsx]

## Sheet: Brain down KEGG
Category	KEGG ID and Term Description	Count	%	p-value	Genes	List Total	Pop Hits	Pop Total	Fold Enrichment	Bonferroni	Benjamini	FDR
KEGG_PATHWAY	hsa04724:Glutamatergic synapse	15	3.76884	9.34944e-08	ITPR1, CACNA1A, ADCY2, GRIK1, CACNA1C, GRIK2, GRIN2C, GRM1, GRIN1, GRM3, GNAQ, SLC17A6, SLC17A7, HOMER3, SLC38A3	146	114	6879	6.19953	1.5146e-05	1.51461e-05	1.38372e-05
KEGG_PATHWAY	hsa04360:Axon guidance	13	3.26633	1.31187e-05	ROBO2, EPHA5, NTNG2, EPHA4, ROBO3, EPHA6, EPHA8, UNC5C, L1CAM, EFNA1, ABLIM1, RGS3, RASA1	146	127	6879	4.82294	0.00212299	0.00106262	0.000970785
KEGG_PATHWAY	hsa04020:Calcium signaling pathway	14	3.51759	9.36715e-05	PDE1A, ITPR1, CACNA1A, ADCY2, ADRB1, CACNA1C, ADRB2, GRIN2C, GRM1, SLC8A2, GRIN1, ERBB4, GNAQ, PLCD3	146	179	6879	3.68508	0.0150609	0.00505826	0.00462113
KEGG_PATHWAY	hsa04723:Retrograde endocannabinoid signaling	10	2.51256	0.000257456	RIMS1, GABRA6, GNAQ, ITPR1, CACNA1A, SLC17A6, SLC17A7, ADCY2, CACNA1C, GRM1	146	101	6879	4.66499	0.0408552	0.010427	0.00952586
KEGG_PATHWAY	hsa04261:Adrenergic signaling in cardiomyocytes	11	2.76382	0.000627877	CACNG6, CACNB2, GNAQ, ADRB1, ADCY2, CACNG1, CACNA2D4, CACNA1C, ADRB2, SCN1B, CREB5	146	138	6879	3.75566	0.0967429	0.0203432	0.0185852
KEGG_PATHWAY	hsa04010:MAPK signaling pathway	15	3.76884	0.000848696	DUSP5, ZAK, RASGRF1, CACNA1A, CACNA1C, CACNA2D4, DUSP16, CACNG6, CACNB2, FGF8, RASA1, STMN1, CACNG1, MAP3K12, FGF10	146	253	6879	2.79346	0.128507	0.0229148	0.0209345
KEGG_PATHWAY	hsa05033:Nicotine addiction	6	1.50754	0.00141046	GABRA6, CACNA1A, SLC17A6, SLC17A7, GRIN2C, GRIN1	146	40	6879	7.06747	0.204397	0.0324014	0.0296012
KEGG_PATHWAY	hsa04022:cGMP-PKG signaling pathway	11	2.76382	0.00177424	OPRD1, BAD, GNAQ, ITPR1, GTF2IRD1, ADRB1, ADCY2, CACNA1C, ADRB2, CREB5, SLC8A2	146	158	6879	3.28026	0.25	0.0324014	0.0296012
KEGG_PATHWAY	hsa05414:Dilated cardiomyopathy	8	2.01005	0.00186954	CACNG6, CACNB2, DES, ADRB1, ADCY2, CACNG1, CACNA2D4, CACNA1C	146	84	6879	4.48728	0.261511	0.0324014	0.0296012
KEGG_PATHWAY	hsa04721:Synaptic vesicle cycle	7	1.75879	0.00200008	UNC13B, UNC13C, RIMS1, CACNA1A, SLC17A6, SLC17A7, CPLX2	146	63	6879	5.23516	0.276994	0.0324014	0.0296012
KEGG_PATHWAY	hsa04514:Cell adhesion molecules (CAMs)	10	2.51256	0.0029683	NTNG2, CNTNAP2, CLDN20, CNTN1, NRXN3, L1CAM, NEO1, NECTIN3, PTPRF, JAM2	146	142	6879	3.31806	0.382193	0.043715	0.0399371
KEGG_PATHWAY	hsa04080:Neuroactive ligand-receptor interaction	14	3.51759	0.00547264	OPRD1, PRSS1, GRID2, GABRA6, GRIK1, ADRB1, GRIK2, ADRB2, OPRM1, GRIN2C, GRM1, GRIN1, GRM3, DRD4	146	277	6879	2.38134	0.588934	0.0738806	0.0674959
KEGG_PATHWAY	hsa04924:Renin secretion	6	1.50754	0.0109249	PDE1A, GNAQ, ITPR1, ADRB1, CACNA1C, ADRB2	146	64	6879	4.41717	0.831289	0.133276	0.121758
KEGG_PATHWAY	hsa05032:Morphine addiction	7	1.75879	0.0121491	PDE11A, GABRA6, PDE1A, CACNA1A, ADCY2, OPRM1, PDE8B	146	91	6879	3.62434	0.861959	0.133276	0.121758
KEGG_PATHWAY	hsa04720:Long-term potentiation	6	1.50754	0.0123854	GNAQ, ITPR1, CACNA1C, GRIN2C, GRM1, GRIN1	146	66	6879	4.28331	0.867206	0.133276	0.121758
KEGG_PATHWAY	hsa05412:Arrhythmogenic right ventricular cardiomyopathy (ARVC)	6	1.50754	0.013163	CACNG6, CACNB2, DES, CACNG1, CACNA2D4, CACNA1C	146	67	6879	4.21938	0.883115	0.133276	0.121758
KEGG_PATHWAY	hsa04728:Dopaminergic synapse	8	2.01005	0.0181832	GNAQ, PPP1R1B, ITPR1, CACNA1A, CACNA1C, DRD4, CREB5, ARNTL	146	128	6879	2.94478	0.948839	0.173275	0.158301
KEGG_PATHWAY	hsa05030:Cocaine addiction	5	1.25628	0.0192675	GRM3, PPP1R1B, GRIN2C, CREB5, GRIN1	146	49	6879	4.8078	0.957225	0.173408	0.158422
KEGG_PATHWAY	hsa05410:Hypertrophic cardiomyopathy (HCM)	6	1.50754	0.0239689	CACNG6, CACNB2, DES, CACNG1, CACNA2D4, CACNA1C	146	78	6879	3.62434	0.980361	0.204367	0.186705
KEGG_PATHWAY	hsa04925:Aldosterone synthesis and secretion	6	1.50754	0.0276813	GNAQ, ITPR1, ADCY2, CACNA1C, KCNK3, CREB5	146	81	6879	3.49011	0.989408	0.224219	0.204842
KEGG_PATHWAY	hsa04730:Long-term depression	5	1.25628	0.0371868	GRID2, GNAQ, ITPR1, CACNA1A, GRM1	146	60	6879	3.92637	0.997843	0.273096	0.249495
KEGG_PATHWAY	hsa04540:Gap junction	6	1.50754	0.0377085	TJP1, GNAQ, ITPR1, ADRB1, ADCY2, GRM1	146	88	6879	3.21248	0.998024	0.273096	0.249495
KEGG_PATHWAY	hsa04921:Oxytocin signaling pathway	8	2.01005	0.0387729	CACNG6, CACNB2, GNAQ, ITPR1, ADCY2, CACNG1, CACNA2D4, CACNA1C	146	150	6879	2.51288	0.998349	0.273096	0.249495
KEGG_PATHWAY	hsa04713:Circadian entrainment	6	1.50754	0.0497105	GNAQ, ITPR1, ADCY2, CACNA1C, GRIN2C, GRIN1	146	95	6879	2.97578	0.999741	0.323748	0.29577
KEGG_PATHWAY	hsa05031:Amphetamine addiction	5	1.25628	0.0499612	PPP1R1B, CACNA1C, GRIN2C, CREB5, GRIN1	146	66	6879	3.56943	0.999752	0.323748	0.29577
KEGG_PATHWAY	hsa04024:cAMP signaling pathway	9	2.26131	0.0573759	BAD, PPP1R1B, ADRB1, ADCY2, CACNA1C, ADRB2, GRIN2C, CREB5, GRIN1	146	198	6879	2.14166	0.99993	0.344835	0.315035
KEGG_PATHWAY	hsa04915:Estrogen signaling pathway	6	1.50754	0.0574726	GNAQ, ITPR1, ADCY2, OPRM1, GRM1, CREB5	146	99	6879	2.85554	0.999932	0.344835	0.315035
KEGG_PATHWAY	hsa05205:Proteoglycans in cancer	9	2.26131	0.0601602	FZD3, ERBB4, LUM, IGF2, ITPR1, GPC3, ANK3, WNT16, ANK1	146	200	6879	2.12024	0.999957	0.34807	0.31799
KEGG_PATHWAY	hsa04260:Cardiac muscle contraction	5	1.25628	0.0730863	CACNG6, CACNB2, CACNG1, CACNA2D4, CACNA1C	146	75	6879	3.1411	0.999995	0.408275	0.372992
KEGG_PATHWAY	hsa04725:Cholinergic synapse	6	1.50754	0.0846936	GNAQ, ITPR1, CACNA1A, ADCY2, CACNA1C, CREB5	146	111	6879	2.54683	0.999999	0.457345	0.417822

## Sheet: Gill down KEGG
Category	KEGG ID and Term Description	Count	%	p-value	Genes	List Total	Pop Hits	Pop Total	Fold Enrichment	Bonferroni	Benjamini	FDR
KEGG_PATHWAY	hsa04110:Cell cycle	16	5.57491	1.46183e-08	PCNA, PLK1, TTK, CCNB3, CCNA2, CDC20, CCNB1, ESPL1, PTTG1, CDK2, CDK1, MCM5, MCM6, MAD1L1, MCM2, MAD2L1	136	124	6879	6.52657	2.99674e-06	2.03553e-06	2.00574e-06
KEGG_PATHWAY	hsa03030:DNA replication	10	3.48432	1.98588e-08	POLA1, FEN1, PCNA, POLD2, RPA1, RPA2, MCM5, MCM6, POLE, MCM2	136	36	6879	14.0502	4.07106e-06	2.03553e-06	2.00574e-06
KEGG_PATHWAY	hsa00240:Pyrimidine metabolism	9	3.13589	0.000779847	POLA1, RRM1, DTYMK, DUT, RRM2, POLD2, POLR2H, DCK, POLE	136	101	6879	4.50721	0.147797	0.0532896	0.0525097
KEGG_PATHWAY	hsa04114:Oocyte meiosis	9	3.13589	0.00144635	CDC20, CCNB1, PTTG1, ESPL1, PLK1, CDK2, CDK1, MAD2L1, AURKA	136	111	6879	4.10115	0.256746	0.0622961	0.0613845
KEGG_PATHWAY	hsa04914:Progesterone-mediated oocyte maturation	8	2.78746	0.00151942	CCNB3, CCNA2, CCNB1, PLK1, CDK2, CDK1, MAD1L1, MAD2L1	136	87	6879	4.65112	0.267812	0.0622961	0.0613845
KEGG_PATHWAY	hsa04668:TNF signaling pathway	8	2.78746	0.00490707	CASP7, JAG1, CASP10, CREB3L1, RIPK1, PTGS2, CXCL2, CX3CL1	136	107	6879	3.78175	0.635207	0.167658	0.165205
KEGG_PATHWAY	hsa00230:Purine metabolism	10	3.48432	0.00756317	POLA1, RRM1, RRM2, POLD2, POLR2H, DCK, POLE, XDH, PAICS, ADA	136	176	6879	2.87391	0.789094	0.221493	0.218251
KEGG_PATHWAY	hsa03430:Mismatch repair	4	1.39373	0.00982235	PCNA, POLD2, RPA1, RPA2	136	23	6879	8.79668	0.867813	0.251698	0.248014
KEGG_PATHWAY	hsa03420:Nucleotide excision repair	5	1.74216	0.0131821	PCNA, POLD2, RPA1, RPA2, POLE	136	47	6879	5.38094	0.934145	0.300259	0.295865
KEGG_PATHWAY	hsa03410:Base excision repair	4	1.39373	0.0262597	FEN1, PCNA, POLD2, POLE	136	33	6879	6.13102	0.995726	0.538324	0.530446
KEGG_PATHWAY	hsa00533:Glycosaminoglycan biosynthesis - keratan sulfate	3	1.0453	0.033967	CHST6, B3GNT7, CHST2	136	15	6879	10.1162	0.999162	0.633021	0.623757
KEGG_PATHWAY	hsa04115:p53 signaling pathway	5	1.74216	0.042066	CCNB3, CCNB1, RRM2, CDK2, CDK1	136	67	6879	3.77469	0.999851	0.718627	0.708111
KEGG_PATHWAY	hsa05161:Hepatitis B	7	2.43902	0.0651668	CCNA2, PCNA, CASP10, CREB3L1, CDK2, PTK2B, BIRC5	136	145	6879	2.44184	0.999999	1	0.990196
KEGG_PATHWAY	hsa05222:Small cell lung cancer	5	1.74216	0.0853241	LAMB2, CDK2, COL4A6, PTGS2, CKS1B	136	85	6879	2.97535	1	1	0.990196
KEGG_PATHWAY	hsa04512:ECM-receptor interaction	5	1.74216	0.0911059	COL24A1, LAMB2, COL4A6, COL6A3, THBS2	136	87	6879	2.90695	1	1	0.990196
KEGG_PATHWAY	hsa04923:Regulation of lipolysis in adipocytes	4	1.39373	0.096813	ADORA1, ADRB1, PTGS2, PTGS1	136	56	6879	3.61292	1	1	0.990196

## Sheet: HK down KEGG
Category	KEGG ID and Term Description	Count	%	p-value	Genes	List Total	Pop Hits	Pop Total	Fold Enrichment	Bonferroni	Benjamini	FDR
KEGG_PATHWAY	hsa00100:Steroid biosynthesis	11	16.1765	2.30755e-18	SQLE, EBP, NSDHL, CYP51A1, SC5D, MSMO1, DHCR24, HSD17B7, LSS, TM7SF2, FDFT1	41	20	6879	92.2793	1.52298e-16	1.52298e-16	1.52298e-16
KEGG_PATHWAY	hsa01130:Biosynthesis of antibiotics	12	17.6471	1.93906e-08	FDPS, SQLE, NSDHL, HMGCS1, CYP51A1, SC5D, MSMO1, HMGCR, HSD17B7, LSS, TM7SF2, FDFT1	41	212	6879	9.49701	1.27978e-06	6.3989e-07	6.3989e-07
KEGG_PATHWAY	hsa01100:Metabolic pathways	19	27.9412	5.74641e-05	FDPS, HMGCS1, PANK1, EPHX2, CYP51A1, MTHFR, MSMO1, DHCR24, HMGCR, HSD17B7, LSS, TM7SF2, GRHPR, SQLE, EBP, NSDHL, MAT2A, SC5D, FDFT1	41	1219	6879	2.61512	0.00378556	0.00126421	0.00126421
KEGG_PATHWAY	hsa00900:Terpenoid backbone biosynthesis	3	4.41176	0.00707623	FDPS, HMGCS1, HMGCR	41	22	6879	22.8792	0.374179	0.116758	0.116758

## Sheet: Liver down KEGG
Category	KEGG ID and Term Description	Count	%	p-value	Genes	List Total	Pop Hits	Pop Total	Fold Enrichment	Bonferroni	Benjamini	FDR
KEGG_PATHWAY	hsa00100:Steroid biosynthesis	4	5.7971	0.000166188	EBP, DHCR24, HSD17B7, TM7SF2	39	20	6879	35.2769	0.0172998	0.0174497	0.0174497
KEGG_PATHWAY	hsa01100:Metabolic pathways	13	18.8406	0.0269703	FDPS, PCYT2, PANK1, EPHX2, MTHFR, DHCR24, CSAD, HSD17B7, CYP8B1, TM7SF2, EBP, ACOT1, UGT2A1	39	1219	6879	1.88105	0.943345	1	1
KEGG_PATHWAY	hsa00140:Steroid hormone biosynthesis	3	4.34783	0.0404611	SULT2B1, UGT2A1, HSD17B7	39	58	6879	9.12334	0.986921	1	1
KEGG_PATHWAY	hsa00982:Drug metabolism - cytochrome P450	3	4.34783	0.0538831	GSTT1, UGT2A1, FMO5	39	68	6879	7.78167	0.99702	1	1

## Sheet: Intestine down KEGG
Category	KEGG ID and Term Description	Count	%	p-value	Genes	List Total	Pop Hits	Pop Total	Fold Enrichment	Bonferroni	Benjamini	FDR
KEGG_PATHWAY	hsa01100:Metabolic pathways	20	21.5054	0.000531509	CYP2J2, UGT1A1, GPAA1, PTGES3, CYP51A1, NDUFC2, HSD17B12, HMGCR, PAPSS2, DDOST, GCK, QDPR, RPIA, HADHA, GLUD1, ADI1, NDUFS4, ME3, UQCRC2, ALDH9A1	51	1219	6879	2.213	0.0717285	0.0744113	0.0744113
KEGG_PATHWAY	hsa03050:Proteasome	4	4.30108	0.00388108	PSMD8, PSMC4, PSMB3, PSMA8	51	44	6879	12.262	0.419815	0.190847	0.190847
KEGG_PATHWAY	hsa01130:Biosynthesis of antibiotics	7	7.52688	0.00408958	RPIA, HADHA, CYP51A1, HMGCR, PAPSS2, GCK, ALDH9A1	51	212	6879	4.45366	0.436571	0.190847	0.190847
KEGG_PATHWAY	hsa01200:Carbon metabolism	5	5.37634	0.00889451	RPIA, HADHA, GLUD1, ME3, GCK	51	113	6879	5.96825	0.713725	0.311308	0.311308
KEGG_PATHWAY	hsa00071:Fatty acid degradation	3	3.22581	0.037062	HADHA, CPT1A, ALDH9A1	51	42	6879	9.63445	0.994944	1	1
KEGG_PATHWAY	hsa01212:Fatty acid metabolism	3	3.22581	0.0472428	HADHA, CPT1A, HSD17B12	51	48	6879	8.43015	0.998858	1	1
KEGG_PATHWAY	hsa00480:Glutathione metabolism	3	3.22581	0.0526747	GSTO1, GSTP1, TXNDC12	51	51	6879	7.93426	0.999487	1	1
KEGG_PATHWAY	hsa05169:Epstein-Barr virus infection	4	4.30108	0.0584113	PSMD8, PSMC4, HLA-DPB1, CD44	51	122	6879	4.42237	0.999781	1	1
KEGG_PATHWAY	hsa05012:Parkinson's disease	4	4.30108	0.0836921	NDUFS4, NDUFC2, PARK7, UQCRC2	51	142	6879	3.7995	0.999995	1	1
KEGG_PATHWAY	hsa00982:Drug metabolism - cytochrome P450	3	3.22581	0.0871347	UGT1A1, GSTO1, GSTP1	51	68	6879	5.95069	0.999997	1	1
