# Supplementary material for: Comparative Transcriptome Analysis of Organ-Specific Adaptive Responses to Hypoxia Provides Insights to Human Diseases
Source: Genes (Basel). 2022 Jun 19;13(6):1096. doi: 10.3390/genes13061096 (PMC9222487; doi:10.3390/genes13061096)
Supplement: Supplementary file 1 [file genes-13-01096-s001.zip › Table S10.xlsx]

## Sheet: Brain GO
Category	Term	Count	%	p-value	Genes	List Total	Pop Hits	Pop Total	Fold Enrichment	Bonferroni	Benjamini	FDR
DISGENET	C0036341~Schizophrenia	95	17.3042	9.59791e-17	DDR1, CNTNAP2, GABRB1, TENM4, MYT1L, NCAN, GRIK4, ATP2A2, GRIK1, GRIK2, SLC6A1, COMT, CLU, GRM1, GRM3, RGS5, GRM5, GRM4, CCKAR, PDE4B, KDR, NEFL, DLGAP1, NOS1, SLC6A11, UNC5C, NAV1, PAX6, ANK3, OXSR1, OPRM1, PDYN, NPAS4, CACNB2, ADCYAP1, FEZ1, ADAM12, LTA, CRH, TNIK, MET, GRIA1, NLGN1, ADCYAP1R1, MAOB, LRP1, SEMA3A, STXBP1, SLC1A1, CACNA1B, NRXN3, CACNA1C, CPLX2, EFNB2, GRIN2A, RELN, PTPRZ1, ERBB…	429	883	9702	2.43314	2.47247e-13	2.13745e-13	2.05299e-13
DISGENET	C0005586~Bipolar Disorder	62	11.2933	2.30356e-14	CNTNAP2, GABRB1, TENM4, NCAN, RASGRF1, GRIK4, GRIK1, GRIK2, COMT, SAT1, GRM3, GRM5, GRM4, CCKAR, PDE4B, NEFL, CHRNB3, DSCAM, TRPC3, IGFBP2, SLC6A13, ANK3, PDYN, DUSP6, CACNB2, ADCYAP1, SFRP1, GAL, CRH, ATF5, GRIA1, NLGN1, MAOB, SLC1A1, CACNA1B, CACNA1A, ADCY2, CACNA1C, CPLX2, ADCY8, HIF1A, GRIN2A, LDHA, RELN, ERBB4, SLC17A6, SLC17A7, NCAM1, TAC1, GRIA3, S100A10, GABRA1, GABRA5, GAD1, DTNBP1, GAD2…	429	477	9702	2.93953	5.11801e-11	2.56502e-11	2.46366e-11
DISGENET	C0011570~Mental Depression	42	7.65027	2.98922e-13	GRIA1, MAOB, SLC1A1, ATP2A2, ADRB1, CACNA1C, TRH, SLC6A1, COMT, ADCY8, CPLX2, HIF1A, GRM1, CRHBP, GRIN2A, LDHA, AANAT, RELN, NPY, PENK, PDE4B, NCAM1, TAC1, GRIA3, S100A10, CHRNB3, HOMER1, DUSP1, GAD1, DTNBP1, CARTPT, OPRM1, PDYN, GRIN2B, DUSP6, VEGFA, ADCYAP1, SFRP1, GAL, DLG4, CRH, CDH13	429	254	9702	3.73955	6.65588e-10	2.21899e-10	2.13131e-10
DISGENET	C0011581~Depressive disorder	44	8.01457	1.35547e-12	GRIA1, MAOB, SLC1A1, ATP2A2, ADRB1, CACNA1C, TRH, SLC6A1, COMT, ADCY8, CPLX2, SAT1, GRM1, CRHBP, GRIN2A, AANAT, RELN, NPY, FTH1, PENK, PDE4B, NCAM1, NOS1, TAC1, GRIA3, S100A10, CHRNB3, CADM1, HOMER1, DUSP1, GAD1, DTNBP1, CARTPT, OPRM1, PDYN, GRIN2B, DUSP6, VEGFA, ADCYAP1, SFRP1, GAL, DLG4, CRH, CDH13	429	289	9702	3.44317	3.01863e-09	7.54657e-10	7.24837e-10
DISGENET	C1269683~Major Depressive Disorder	39	7.10383	6.3246e-12	CNTNAP2, LRP1, MAOB, MYT1L, SERPINE1, GRIK4, ARRB1, CACNA1C, COMT, HIF1A, SAT1, KALRN, CRHBP, GRM5, LDHA, RELN, CCKAR, NPY, KDR, NEFL, SLC17A6, NCAM1, TAC1, S100A10, HOMER1, PRKCB, GAD1, SLC6A13, LSAMP, DTNBP1, GAD2, PDYN, VEGFA, GAL, DLG4, SST, DDIT4, CRH, SGK1	429	243	9702	3.62963	1.40849e-08	2.81698e-09	2.70566e-09
DISGENET	C0525045~Mood Disorders	32	5.82878	7.64186e-12	MAOB, ATP2A2, ADRB1, CACNA1C, GRIK2, COMT, ADCY8, HIF1A, SAT1, GRM3, CRHBP, GRIN2A, LDHA, RELN, NPY, NCAM1, TAC1, S100A10, GABRA1, SLC12A5, GABRA5, GAD1, DTNBP1, GAD2, ANK3, PDYN, DUSP6, VEGFA, GAL, DLG4, SST, CRH	429	168	9702	4.30769	1.70185e-08	2.8364e-09	2.72432e-09
DISGENET	C0041696~Unipolar Depression	40	7.28597	1.09633e-11	CNTNAP2, LRP1, MAOB, MYT1L, SERPINE1, GRIK4, ARRB1, CACNA1C, TRH, COMT, HIF1A, SAT1, KALRN, GRM1, CRHBP, GRM5, LDHA, RELN, CCKAR, NPY, FTH1, KDR, NEFL, SLC17A6, NCAM1, NOS1, S100A10, CADM1, HOMER1, PRKCB, GAD1, SLC6A13, LSAMP, DTNBP1, PDYN, DLG4, SST, DDIT4, CRH, SGK1	429	259	9702	3.49272	2.44151e-08	3.48789e-09	3.35006e-09
DISGENET	C0001973~Alcoholic Intoxication, Chronic	39	7.10383	1.27399e-10	SEMA5A, OPRD1, CNTNAP2, GABRB1, MAOB, RASGRF2, NRXN3, GRIK1, TRH, PIK3R1, SLC6A1, COMT, SAT1, GRM1, GRM3, CDH5, CRHBP, GRIN2A, CCKAR, NPY, PDE4B, NCAM1, TAC1, GABRA1, NLGN4X, CHRNB3, GABRA5, EPHA8, GAD1, CCK, CARTPT, OPRM1, PDYN, GRIN2B, GRIN1, GAL, CDH11, CRH, CDH13	429	268	9702	3.29104	2.83717e-07	2.72614e-08	2.61842e-08
DISGENET	C3495874~Nonepileptic Seizures	23	4.18944	3.30515e-10	NRP2, PLPPR1, CDKL5, SLC12A5, GABRA5, SLC1A1, GAD2, GRIK1, CCK, TRH, OPRM1, SLC6A1, PDYN, CLU, SLC8A1, SLC8A3, ADCYAP1, SST, NPY, CRH, SLC17A7, NOS1, PAM	429	101	9702	5.15004	7.36057e-07	2.72614e-08	2.61842e-08
DISGENET	C0422850~Seizures, Somatosensory	23	4.18944	3.30515e-10	NRP2, PLPPR1, CDKL5, SLC12A5, GABRA5, SLC1A1, GAD2, GRIK1, CCK, TRH, OPRM1, SLC6A1, PDYN, CLU, SLC8A1, SLC8A3, ADCYAP1, SST, NPY, CRH, SLC17A7, NOS1, PAM	429	101	9702	5.15004	7.36057e-07	2.72614e-08	2.61842e-08
DISGENET	C4317109~Epileptic Seizures	23	4.18944	3.30515e-10	NRP2, PLPPR1, CDKL5, SLC12A5, GABRA5, SLC1A1, GAD2, GRIK1, CCK, TRH, OPRM1, SLC6A1, PDYN, CLU, SLC8A1, SLC8A3, ADCYAP1, SST, NPY, CRH, SLC17A7, NOS1, PAM	429	101	9702	5.15004	7.36057e-07	2.72614e-08	2.61842e-08
DISGENET	C0422855~Vertiginous seizure	23	4.18944	3.30515e-10	NRP2, PLPPR1, CDKL5, SLC12A5, GABRA5, SLC1A1, GAD2, GRIK1, CCK, TRH, OPRM1, SLC6A1, PDYN, CLU, SLC8A1, SLC8A3, ADCYAP1, SST, NPY, CRH, SLC17A7, NOS1, PAM	429	101	9702	5.15004	7.36057e-07	2.72614e-08	2.61842e-08
DISGENET	C4505436~Generalized Absence Seizures	23	4.18944	3.30515e-10	NRP2, PLPPR1, CDKL5, SLC12A5, GABRA5, SLC1A1, GAD2, GRIK1, CCK, TRH, OPRM1, SLC6A1, PDYN, CLU, SLC8A1, SLC8A3, ADCYAP1, SST, NPY, CRH, SLC17A7, NOS1, PAM	429	101	9702	5.15004	7.36057e-07	2.72614e-08	2.61842e-08
DISGENET	C0422853~Olfactory seizure	23	4.18944	3.30515e-10	NRP2, PLPPR1, CDKL5, SLC12A5, GABRA5, SLC1A1, GAD2, GRIK1, CCK, TRH, OPRM1, SLC6A1, PDYN, CLU, SLC8A1, SLC8A3, ADCYAP1, SST, NPY, CRH, SLC17A7, NOS1, PAM	429	101	9702	5.15004	7.36057e-07	2.72614e-08	2.61842e-08
DISGENET	C0751110~Single Seizure	23	4.18944	3.30515e-10	NRP2, PLPPR1, CDKL5, SLC12A5, GABRA5, SLC1A1, GAD2, GRIK1, CCK, TRH, OPRM1, SLC6A1, PDYN, CLU, SLC8A1, SLC8A3, ADCYAP1, SST, NPY, CRH, SLC17A7, NOS1, PAM	429	101	9702	5.15004	7.36057e-07	2.72614e-08	2.61842e-08
DISGENET	C0751496~Seizures, Sensory	23	4.18944	3.30515e-10	NRP2, PLPPR1, CDKL5, SLC12A5, GABRA5, SLC1A1, GAD2, GRIK1, CCK, TRH, OPRM1, SLC6A1, PDYN, CLU, SLC8A1, SLC8A3, ADCYAP1, SST, NPY, CRH, SLC17A7, NOS1, PAM	429	101	9702	5.15004	7.36057e-07	2.72614e-08	2.61842e-08
DISGENET	C0422852~Seizures, Auditory	23	4.18944	3.30515e-10	NRP2, PLPPR1, CDKL5, SLC12A5, GABRA5, SLC1A1, GAD2, GRIK1, CCK, TRH, OPRM1, SLC6A1, PDYN, CLU, SLC8A1, SLC8A3, ADCYAP1, SST, NPY, CRH, SLC17A7, NOS1, PAM	429	101	9702	5.15004	7.36057e-07	2.72614e-08	2.61842e-08
DISGENET	C0270846~Epileptic drop attack	23	4.18944	3.30515e-10	NRP2, PLPPR1, CDKL5, SLC12A5, GABRA5, SLC1A1, GAD2, GRIK1, CCK, TRH, OPRM1, SLC6A1, PDYN, CLU, SLC8A1, SLC8A3, ADCYAP1, SST, NPY, CRH, SLC17A7, NOS1, PAM	429	101	9702	5.15004	7.36057e-07	2.72614e-08	2.61842e-08
DISGENET	C0270824~Visual seizure	23	4.18944	3.30515e-10	NRP2, PLPPR1, CDKL5, SLC12A5, GABRA5, SLC1A1, GAD2, GRIK1, CCK, TRH, OPRM1, SLC6A1, PDYN, CLU, SLC8A1, SLC8A3, ADCYAP1, SST, NPY, CRH, SLC17A7, NOS1, PAM	429	101	9702	5.15004	7.36057e-07	2.72614e-08	2.61842e-08
DISGENET	C0751123~Atonic Absence Seizures	23	4.18944	3.30515e-10	NRP2, PLPPR1, CDKL5, SLC12A5, GABRA5, SLC1A1, GAD2, GRIK1, CCK, TRH, OPRM1, SLC6A1, PDYN, CLU, SLC8A1, SLC8A3, ADCYAP1, SST, NPY, CRH, SLC17A7, NOS1, PAM	429	101	9702	5.15004	7.36057e-07	2.72614e-08	2.61842e-08
DISGENET	C0234533~Generalized seizures	23	4.18944	3.30515e-10	NRP2, PLPPR1, CDKL5, SLC12A5, GABRA5, SLC1A1, GAD2, GRIK1, CCK, TRH, OPRM1, SLC6A1, PDYN, CLU, SLC8A1, SLC8A3, ADCYAP1, SST, NPY, CRH, SLC17A7, NOS1, PAM	429	101	9702	5.15004	7.36057e-07	2.72614e-08	2.61842e-08
DISGENET	C0234535~Clonic Seizures	23	4.18944	3.30515e-10	NRP2, PLPPR1, CDKL5, SLC12A5, GABRA5, SLC1A1, GAD2, GRIK1, CCK, TRH, OPRM1, SLC6A1, PDYN, CLU, SLC8A1, SLC8A3, ADCYAP1, SST, NPY, CRH, SLC17A7, NOS1, PAM	429	101	9702	5.15004	7.36057e-07	2.72614e-08	2.61842e-08
DISGENET	C0422854~Gustatory seizure	23	4.18944	3.30515e-10	NRP2, PLPPR1, CDKL5, SLC12A5, GABRA5, SLC1A1, GAD2, GRIK1, CCK, TRH, OPRM1, SLC6A1, PDYN, CLU, SLC8A1, SLC8A3, ADCYAP1, SST, NPY, CRH, SLC17A7, NOS1, PAM	429	101	9702	5.15004	7.36057e-07	2.72614e-08	2.61842e-08
DISGENET	C0149958~Complex partial seizures	23	4.18944	3.30515e-10	NRP2, PLPPR1, CDKL5, SLC12A5, GABRA5, SLC1A1, GAD2, GRIK1, CCK, TRH, OPRM1, SLC6A1, PDYN, CLU, SLC8A1, SLC8A3, ADCYAP1, SST, NPY, CRH, SLC17A7, NOS1, PAM	429	101	9702	5.15004	7.36057e-07	2.72614e-08	2.61842e-08
DISGENET	C0751056~Non-epileptic convulsion	23	4.18944	3.30515e-10	NRP2, PLPPR1, CDKL5, SLC12A5, GABRA5, SLC1A1, GAD2, GRIK1, CCK, TRH, OPRM1, SLC6A1, PDYN, CLU, SLC8A1, SLC8A3, ADCYAP1, SST, NPY, CRH, SLC17A7, NOS1, PAM	429	101	9702	5.15004	7.36057e-07	2.72614e-08	2.61842e-08
DISGENET	C0751494~Convulsive Seizures	23	4.18944	3.30515e-10	NRP2, PLPPR1, CDKL5, SLC12A5, GABRA5, SLC1A1, GAD2, GRIK1, CCK, TRH, OPRM1, SLC6A1, PDYN, CLU, SLC8A1, SLC8A3, ADCYAP1, SST, NPY, CRH, SLC17A7, NOS1, PAM	429	101	9702	5.15004	7.36057e-07	2.72614e-08	2.61842e-08
DISGENET	C0022333~Jacksonian Seizure	23	4.18944	3.30515e-10	NRP2, PLPPR1, CDKL5, SLC12A5, GABRA5, SLC1A1, GAD2, GRIK1, CCK, TRH, OPRM1, SLC6A1, PDYN, CLU, SLC8A1, SLC8A3, ADCYAP1, SST, NPY, CRH, SLC17A7, NOS1, PAM	429	101	9702	5.15004	7.36057e-07	2.72614e-08	2.61842e-08
DISGENET	C4316903~Absence Seizures	23	4.18944	4.04491e-10	NRP2, PLPPR1, CDKL5, SLC12A5, GABRA5, SLC1A1, GAD2, GRIK1, CCK, TRH, OPRM1, SLC6A1, PDYN, CLU, SLC8A1, SLC8A3, ADCYAP1, SST, NPY, CRH, SLC17A7, NOS1, PAM	429	102	9702	5.09955	9.00802e-07	3.00267e-08	2.88402e-08
DISGENET	C4048158~Convulsions	23	4.18944	4.04491e-10	NRP2, PLPPR1, CDKL5, SLC12A5, GABRA5, SLC1A1, GAD2, GRIK1, CCK, TRH, OPRM1, SLC6A1, PDYN, CLU, SLC8A1, SLC8A3, ADCYAP1, SST, NPY, CRH, SLC17A7, NOS1, PAM	429	102	9702	5.09955	9.00802e-07	3.00267e-08	2.88402e-08
DISGENET	C0270844~Tonic Seizures	23	4.18944	4.04491e-10	NRP2, PLPPR1, CDKL5, SLC12A5, GABRA5, SLC1A1, GAD2, GRIK1, CCK, TRH, OPRM1, SLC6A1, PDYN, CLU, SLC8A1, SLC8A3, ADCYAP1, SST, NPY, CRH, SLC17A7, NOS1, PAM	429	102	9702	5.09955	9.00802e-07	3.00267e-08	2.88402e-08
DISGENET	C0494475~Tonic - clonic seizures	23	4.18944	6.01029e-10	NRP2, PLPPR1, CDKL5, SLC12A5, GABRA5, SLC1A1, GAD2, GRIK1, CCK, TRH, OPRM1, SLC6A1, PDYN, CLU, SLC8A1, SLC8A3, ADCYAP1, SST, NPY, CRH, SLC17A7, NOS1, PAM	429	104	9702	5.00148	1.33849e-06	4.05604e-08	3.89576e-08
DISGENET	C4317123~Myoclonic Seizures	23	4.18944	6.01029e-10	NRP2, PLPPR1, CDKL5, SLC12A5, GABRA5, SLC1A1, GAD2, GRIK1, CCK, TRH, OPRM1, SLC6A1, PDYN, CLU, SLC8A1, SLC8A3, ADCYAP1, SST, NPY, CRH, SLC17A7, NOS1, PAM	429	104	9702	5.00148	1.33849e-06	4.05604e-08	3.89576e-08
DISGENET	C0751495~Seizures, Focal	23	4.18944	6.01029e-10	NRP2, PLPPR1, CDKL5, SLC12A5, GABRA5, SLC1A1, GAD2, GRIK1, CCK, TRH, OPRM1, SLC6A1, PDYN, CLU, SLC8A1, SLC8A3, ADCYAP1, SST, NPY, CRH, SLC17A7, NOS1, PAM	429	104	9702	5.00148	1.33849e-06	4.05604e-08	3.89576e-08
DISGENET	C0005587~Depression, Bipolar	19	3.46084	6.42965e-09	TRPC3, TENM4, GAD1, NCAN, GAD2, GRIK4, ADCY2, ANK3, CACNA1C, GRIK2, COMT, CPLX2, NPAS4, GRIN2A, AANAT, RELN, PDE4B, NCAM1, TAC1	429	79	9702	5.43914	1.43187e-05	4.21142e-07	4.04501e-07
DISGENET	C0004352~Autistic Disorder	34	6.19308	4.06215e-08	GRIA1, ROBO2, SEMA5A, ROBO3, CNTNAP2, GABRB1, NLGN1, NRP2, MAOB, SERPINE1, NRXN3, CACNA1C, GRIK2, COMT, ROBO1, GRIN2A, RELN, PDE4B, ASIC2, GABRA1, MEF2C, NLGN4X, CADM1, ITGA4, KCND2, PRKCB, GABRA5, GAD1, IGFBP3, PAX6, MCC, GRIN2B, KCNMA1, MET	429	261	9702	2.94607	9.04601e-05	2.58469e-06	2.48256e-06
DISGENET	C0236018~Aura	18	3.27869	7.59972e-08	OPRD1, SLC12A2, CNTNAP2, MEF2C, CDKL5, SLC12A5, IQSEC2, STXBP1, SLC1A1, KCNAB2, OPRM1, SLC6A1, PCDH19, GRIN2B, GRM1, GRIN2A, NPY, EEF1A2	429	82	9702	4.96435	0.000169231	4.45384e-06	4.27784e-06
DISGENET	C0086237~Epilepsy, Cryptogenic	18	3.27869	7.59972e-08	OPRD1, SLC12A2, CNTNAP2, MEF2C, CDKL5, SLC12A5, IQSEC2, STXBP1, SLC1A1, KCNAB2, OPRM1, SLC6A1, PCDH19, GRIN2B, GRM1, GRIN2A, NPY, EEF1A2	429	82	9702	4.96435	0.000169231	4.45384e-06	4.27784e-06
DISGENET	C0751111~Awakening Epilepsy	18	3.27869	7.59972e-08	OPRD1, SLC12A2, CNTNAP2, MEF2C, CDKL5, SLC12A5, IQSEC2, STXBP1, SLC1A1, KCNAB2, OPRM1, SLC6A1, PCDH19, GRIN2B, GRM1, GRIN2A, NPY, EEF1A2	429	82	9702	4.96435	0.000169231	4.45384e-06	4.27784e-06
DISGENET	C0014544~Epilepsy	20	3.64299	2.40924e-07	OPRD1, SLC12A2, CNTNAP2, MEF2C, CDKL5, SLC12A5, KCND2, IQSEC2, STXBP1, SLC1A1, KCNAB2, OPRM1, SLC6A1, PCDH19, GRIN2B, GRM1, SLC5A6, GRIN2A, NPY, EEF1A2	429	109	9702	4.14961	0.000536393	1.37573e-05	1.32137e-05
DISGENET	C0014558~Uncinate Epilepsy	10	1.82149	2.73942e-07	GRM3, SLC12A2, GRM5, GRM4, SLC12A5, NPY, SLC1A1, KDR, GRM1, VEGFA	429	23	9702	9.83278	0.000609882	1.41876e-05	1.3627e-05
DISGENET	C0014556~Epilepsy, Temporal Lobe	10	1.82149	2.73942e-07	GRM3, SLC12A2, GRM5, GRM4, SLC12A5, NPY, SLC1A1, KDR, GRM1, VEGFA	429	23	9702	9.83278	0.000609882	1.41876e-05	1.3627e-05
DISGENET	C0393682~Epilepsy, Lateral Temporal	10	1.82149	2.73942e-07	GRM3, SLC12A2, GRM5, GRM4, SLC12A5, NPY, SLC1A1, KDR, GRM1, VEGFA	429	23	9702	9.83278	0.000609882	1.41876e-05	1.3627e-05
DISGENET	C0393672~Epilepsy, Benign Psychomotor, Childhood	10	1.82149	2.73942e-07	GRM3, SLC12A2, GRM5, GRM4, SLC12A5, NPY, SLC1A1, KDR, GRM1, VEGFA	429	23	9702	9.83278	0.000609882	1.41876e-05	1.3627e-05
DISGENET	C0311335~Grand Mal Status Epilepticus	15	2.73224	9.80176e-07	JUN, MEF2C, SLC12A5, EPO, ATP2A2, HSPB1, ANK3, SLC8A1, GRM1, VEGFA, SLC8A3, GRM5, KCNMA1, CRH, NOS1	429	67	9702	5.06315	0.00218047	4.4548e-05	4.27877e-05
DISGENET	C0393734~Complex Partial Status Epilepticus	15	2.73224	9.80176e-07	JUN, MEF2C, SLC12A5, EPO, ATP2A2, HSPB1, ANK3, SLC8A1, GRM1, VEGFA, SLC8A3, GRM5, KCNMA1, CRH, NOS1	429	67	9702	5.06315	0.00218047	4.4548e-05	4.27877e-05
DISGENET	C0751524~Simple Partial Status Epilepticus	15	2.73224	9.80176e-07	JUN, MEF2C, SLC12A5, EPO, ATP2A2, HSPB1, ANK3, SLC8A1, GRM1, VEGFA, SLC8A3, GRM5, KCNMA1, CRH, NOS1	429	67	9702	5.06315	0.00218047	4.4548e-05	4.27877e-05
DISGENET	C0751522~Status Epilepticus, Subclinical	15	2.73224	9.80176e-07	JUN, MEF2C, SLC12A5, EPO, ATP2A2, HSPB1, ANK3, SLC8A1, GRM1, VEGFA, SLC8A3, GRM5, KCNMA1, CRH, NOS1	429	67	9702	5.06315	0.00218047	4.4548e-05	4.27877e-05
DISGENET	C0751523~Non-Convulsive Status Epilepticus	15	2.73224	9.80176e-07	JUN, MEF2C, SLC12A5, EPO, ATP2A2, HSPB1, ANK3, SLC8A1, GRM1, VEGFA, SLC8A3, GRM5, KCNMA1, CRH, NOS1	429	67	9702	5.06315	0.00218047	4.4548e-05	4.27877e-05
DISGENET	C0270823~Petit mal status	15	2.73224	9.80176e-07	JUN, MEF2C, SLC12A5, EPO, ATP2A2, HSPB1, ANK3, SLC8A1, GRM1, VEGFA, SLC8A3, GRM5, KCNMA1, CRH, NOS1	429	67	9702	5.06315	0.00218047	4.4548e-05	4.27877e-05
DISGENET	C0038220~Status Epilepticus	15	2.73224	1.18537e-06	JUN, MEF2C, SLC12A5, EPO, ATP2A2, HSPB1, ANK3, SLC8A1, GRM1, VEGFA, SLC8A3, GRM5, KCNMA1, CRH, NOS1	429	68	9702	4.98869	0.00263634	5.27963e-05	5.071e-05
DISGENET	C0338831~Manic	16	2.91439	1.23837e-06	TRPC3, TENM4, GAD1, NCAN, GAD2, ADCY2, CCK, ANK3, CACNA1C, GRIK2, COMT, CPLX2, GRIN2A, RELN, PDE4B, TAC1	429	78	9702	4.63905	0.00275405	5.40755e-05	5.19387e-05
DISGENET	C0024713~Manic Disorder	15	2.73224	2.05093e-06	TRPC3, TENM4, GAD1, NCAN, GAD2, ADCY2, ANK3, CACNA1C, GRIK2, COMT, CPLX2, GRIN2A, RELN, PDE4B, TAC1	429	71	9702	4.7779	0.00455702	8.78352e-05	8.43644e-05
DISGENET	C0036572~Seizures	27	4.91803	3.49204e-06	NRP2, PLPPR1, SLC1A1, CACNA1B, GRIK1, TRH, SLC6A1, CACNA1E, CLU, SLC8A1, RHOBTB2, NPY, SLC17A7, NOS1, CDKL5, SLC12A5, GABRA5, GAD2, CCK, OPRM1, PDYN, SLC8A3, SLC5A6, ADCYAP1, SST, CRH, PAM	429	218	9702	2.80099	0.00774664	0.000146732	0.000140934
DISGENET	C0020538~Hypertensive disease	23	4.18944	3.14694e-05	SLC12A2, JUN, TRPC5, ANXA1, VCAM1, TRPC3, NCF1, EPO, CAV1, SERPINE1, ECE1, ADRB1, TRH, CACNA1C, OXSR1, HIF1A, AQP1, GJC1, RGS5, HSD11B2, EDNRA, GAL, LEPR	429	190	9702	2.73765	0.067684	0.00129782	0.00124654
DISGENET	C0751217~Hyperkinesia, Generalized	9	1.63934	5.54651e-05	GRIA1, NPPC, CNTNAP2, NPY, MAP6, SNCG, CCK, ADCY1, ADCY8	429	32	9702	6.36058	0.1162	0.00220573	0.00211857
DISGENET	C3887506~Hyperkinesia	9	1.63934	5.54651e-05	GRIA1, NPPC, CNTNAP2, NPY, MAP6, SNCG, CCK, ADCY1, ADCY8	429	32	9702	6.36058	0.1162	0.00220573	0.00211857
DISGENET	C2936719~Mechanical Allodynia	14	2.55009	7.15514e-05	SPARC, SLC12A5, TRPA1, PRKCE, CARTPT, OPRM1, COMT, PDYN, GRIN2B, GRIN1, THBD, GAL, NOS1, TAC1	429	84	9702	3.76923	0.147303	0.00252929	0.00242934
DISGENET	C0020429~Hyperalgesia	14	2.55009	7.15514e-05	SPARC, SLC12A5, TRPA1, PRKCE, CARTPT, OPRM1, COMT, PDYN, GRIN2B, GRIN1, THBD, GAL, NOS1, TAC1	429	84	9702	3.76923	0.147303	0.00252929	0.00242934
DISGENET	C0751212~Hyperalgesia, Secondary	14	2.55009	7.15514e-05	SPARC, SLC12A5, TRPA1, PRKCE, CARTPT, OPRM1, COMT, PDYN, GRIN2B, GRIN1, THBD, GAL, NOS1, TAC1	429	84	9702	3.76923	0.147303	0.00252929	0.00242934
DISGENET	C0751214~Hyperalgesia, Thermal	14	2.55009	7.15514e-05	SPARC, SLC12A5, TRPA1, PRKCE, CARTPT, OPRM1, COMT, PDYN, GRIN2B, GRIN1, THBD, GAL, NOS1, TAC1	429	84	9702	3.76923	0.147303	0.00252929	0.00242934
DISGENET	C0751211~Hyperalgesia, Primary	14	2.55009	7.15514e-05	SPARC, SLC12A5, TRPA1, PRKCE, CARTPT, OPRM1, COMT, PDYN, GRIN2B, GRIN1, THBD, GAL, NOS1, TAC1	429	84	9702	3.76923	0.147303	0.00252929	0.00242934
DISGENET	C0751213~Tactile Allodynia	14	2.55009	7.15514e-05	SPARC, SLC12A5, TRPA1, PRKCE, CARTPT, OPRM1, COMT, PDYN, GRIN2B, GRIN1, THBD, GAL, NOS1, TAC1	429	84	9702	3.76923	0.147303	0.00252929	0.00242934
DISGENET	C0458247~Allodynia	14	2.55009	7.15514e-05	SPARC, SLC12A5, TRPA1, PRKCE, CARTPT, OPRM1, COMT, PDYN, GRIN2B, GRIN1, THBD, GAL, NOS1, TAC1	429	84	9702	3.76923	0.147303	0.00252929	0.00242934
DISGENET	C0205696~Anaplastic carcinoma	20	3.64299	9.90356e-05	SLC12A2, ANXA1, RASGRF2, PLK2, GATA3, PTN, PIK3R1, HIF1A, DUSP6, AQP1, GNAI2, KITLG, ALCAM, RASA1, ACKR3, SNCG, ANGPTL4, EZR, SGK1, MET	429	163	9702	2.77489	0.197933	0.00329183	0.00316175
DISGENET	C0205697~Carcinoma, Spindle-Cell	20	3.64299	9.90356e-05	SLC12A2, ANXA1, RASGRF2, PLK2, GATA3, PTN, PIK3R1, HIF1A, DUSP6, AQP1, GNAI2, KITLG, ALCAM, RASA1, ACKR3, SNCG, ANGPTL4, EZR, SGK1, MET	429	163	9702	2.77489	0.197933	0.00329183	0.00316175
DISGENET	C0205698~Undifferentiated carcinoma	20	3.64299	9.90356e-05	SLC12A2, ANXA1, RASGRF2, PLK2, GATA3, PTN, PIK3R1, HIF1A, DUSP6, AQP1, GNAI2, KITLG, ALCAM, RASA1, ACKR3, SNCG, ANGPTL4, EZR, SGK1, MET	429	163	9702	2.77489	0.197933	0.00329183	0.00316175
DISGENET	C0205699~Carcinomatosis	20	3.64299	9.90356e-05	SLC12A2, ANXA1, RASGRF2, PLK2, GATA3, PTN, PIK3R1, HIF1A, DUSP6, AQP1, GNAI2, KITLG, ALCAM, RASA1, ACKR3, SNCG, ANGPTL4, EZR, SGK1, MET	429	163	9702	2.77489	0.197933	0.00329183	0.00316175
DISGENET	C0007097~Carcinoma	20	3.64299	0.000107548	SLC12A2, ANXA1, RASGRF2, PLK2, GATA3, PTN, PIK3R1, HIF1A, DUSP6, AQP1, GNAI2, KITLG, ALCAM, RASA1, ACKR3, SNCG, ANGPTL4, EZR, SGK1, MET	429	164	9702	2.75797	0.212996	0.00352219	0.00338301
DISGENET	C0600427~Cocaine Dependence	18	3.27869	0.00012651	GRIA1, OPRD1, EGR1, TENM3, CHRNB3, HOMER1, GAD1, GAD2, CARTPT, OPRM1, COMT, PDYN, GRIN1, CRHBP, GRM5, CAMK4, NPY, CRH	429	139	9702	2.92861	0.245543	0.00408317	0.00392182
DISGENET	C0751197~Fulminant Hepatic Failure with Cerebral Edema	6	1.0929	0.000156519	GABRA1, GABRB1, MAOB, LTA, NOS1, OPRM1	429	13	9702	10.4379	0.294321	0.0047749	0.00458622
DISGENET	C0019147~Hepatic Coma	6	1.0929	0.000156519	GABRA1, GABRB1, MAOB, LTA, NOS1, OPRM1	429	13	9702	10.4379	0.294321	0.0047749	0.00458622
DISGENET	C0019151~Hepatic Encephalopathy	6	1.0929	0.000156519	GABRA1, GABRB1, MAOB, LTA, NOS1, OPRM1	429	13	9702	10.4379	0.294321	0.0047749	0.00458622
DISGENET	C0751198~Hepatic Stupor	6	1.0929	0.000156519	GABRA1, GABRB1, MAOB, LTA, NOS1, OPRM1	429	13	9702	10.4379	0.294321	0.0047749	0.00458622
DISGENET	C0236736~Cocaine-Related Disorders	16	2.91439	0.000184968	GRIA1, EGR1, TENM3, HOMER1, GAD1, GAD2, CARTPT, OPRM1, COMT, PDYN, GRIN1, CRHBP, GRM5, CAMK4, NPY, CRH	429	117	9702	3.0927	0.33765	0.00556653	0.00534657
DISGENET	C0151744~Myocardial Ischemia	20	3.64299	0.000272762	VCAM1, SPARC, KCNJ8, TFRC, DUSP1, PRKCE, IGFBP3, ADRB1, AXIN2, DCN, SLC8A1, DUSP6, VEGFA, ZFP36, KITLG, ZEB1, KDR, PDE4B, MAP3K8, ALDOA	429	176	9702	2.56993	0.455302	0.00809921	0.00777917
DISGENET	C1510586~Autism Spectrum Disorders	13	2.36794	0.000328359	DPP10, CNTNAP2, MEF2C, NLGN4X, MYT1L, GABRA5, SLC1A1, NRXN3, GRIN2B, DPP6, RELN, LRRTM3, DLG4	429	85	9702	3.45882	0.518754	0.00962179	0.00924158
DISGENET	C0013386~Dyskinesia, Drug-Induced	6	1.0929	0.000339364	HOMER1, GAD1, RASGRF1, PENK, CCK, PDYN	429	15	9702	9.04615	0.530409	0.00968929	0.00930641
DISGENET	C0751088~Dyskinesia, Medication-Induced	6	1.0929	0.000339364	HOMER1, GAD1, RASGRF1, PENK, CCK, PDYN	429	15	9702	9.04615	0.530409	0.00968929	0.00930641
DISGENET	C0009171~Cocaine Abuse	16	2.91439	0.000456926	GRIA1, EGR1, TENM3, HOMER1, GAD1, GAD2, CARTPT, OPRM1, COMT, PDYN, GRIN1, CRHBP, GRM5, CAMK4, NPY, CRH	429	127	9702	2.84918	0.638613	0.0119072	0.0114367
DISGENET	C0234247~Neuralgia, Atypical	6	1.0929	0.000475862	GRM5, GAL, CXCR4, OPRM1, TAC1, PRKG1	429	16	9702	8.48077	0.653543	0.0119072	0.0114367
DISGENET	C0751372~Nerve Pain	6	1.0929	0.000475862	GRM5, GAL, CXCR4, OPRM1, TAC1, PRKG1	429	16	9702	8.48077	0.653543	0.0119072	0.0114367
DISGENET	C0423712~Neuralgia, Iliohypogastric Nerve	6	1.0929	0.000475862	GRM5, GAL, CXCR4, OPRM1, TAC1, PRKG1	429	16	9702	8.48077	0.653543	0.0119072	0.0114367
DISGENET	C0027796~Neuralgia	6	1.0929	0.000475862	GRM5, GAL, CXCR4, OPRM1, TAC1, PRKG1	429	16	9702	8.48077	0.653543	0.0119072	0.0114367
DISGENET	C0038870~Neuralgia, Supraorbital	6	1.0929	0.000475862	GRM5, GAL, CXCR4, OPRM1, TAC1, PRKG1	429	16	9702	8.48077	0.653543	0.0119072	0.0114367
DISGENET	C0234249~Neuralgia, Stump	6	1.0929	0.000475862	GRM5, GAL, CXCR4, OPRM1, TAC1, PRKG1	429	16	9702	8.48077	0.653543	0.0119072	0.0114367
DISGENET	C0042656~Neuralgia, Vidian	6	1.0929	0.000475862	GRM5, GAL, CXCR4, OPRM1, TAC1, PRKG1	429	16	9702	8.48077	0.653543	0.0119072	0.0114367
DISGENET	C0751373~Paroxysmal Nerve Pain	6	1.0929	0.000475862	GRM5, GAL, CXCR4, OPRM1, TAC1, PRKG1	429	16	9702	8.48077	0.653543	0.0119072	0.0114367
DISGENET	C0751371~Neuralgia, Ilioinguinal	6	1.0929	0.000475862	GRM5, GAL, CXCR4, OPRM1, TAC1, PRKG1	429	16	9702	8.48077	0.653543	0.0119072	0.0114367
DISGENET	C0423711~Neuralgia, Perineal	6	1.0929	0.000475862	GRM5, GAL, CXCR4, OPRM1, TAC1, PRKG1	429	16	9702	8.48077	0.653543	0.0119072	0.0114367
DISGENET	C0024667~Animal Mammary Neoplasms	17	3.09654	0.000508202	SLC12A2, ANXA1, RASGRF2, PLK2, GATA3, PTN, PIK3R1, COMT, DUSP6, AQP1, GNAI2, KITLG, ALCAM, RASA1, SNCG, EZR, SGK1	429	142	9702	2.70748	0.67763	0.012437	0.0119455
DISGENET	C1257925~Mammary Carcinoma, Animal	17	3.09654	0.000508202	SLC12A2, ANXA1, RASGRF2, PLK2, GATA3, PTN, PIK3R1, COMT, DUSP6, AQP1, GNAI2, KITLG, ALCAM, RASA1, SNCG, EZR, SGK1	429	142	9702	2.70748	0.67763	0.012437	0.0119455
DISGENET	C0234254~Radiating pain	9	1.63934	0.00123224	TRPA1, PENK, CRH, TRH, COMT, PDYN, TAC1, AQP1, GRIN1	429	49	9702	4.15385	0.935808	0.0277191	0.0266238
DISGENET	C0030193~Pain	9	1.63934	0.00123224	TRPA1, PENK, CRH, TRH, COMT, PDYN, TAC1, AQP1, GRIN1	429	49	9702	4.15385	0.935808	0.0277191	0.0266238
DISGENET	C0234230~Pain, Burning	9	1.63934	0.00123224	TRPA1, PENK, CRH, TRH, COMT, PDYN, TAC1, AQP1, GRIN1	429	49	9702	4.15385	0.935808	0.0277191	0.0266238
DISGENET	C0751407~Pain, Migratory	9	1.63934	0.00123224	TRPA1, PENK, CRH, TRH, COMT, PDYN, TAC1, AQP1, GRIN1	429	49	9702	4.15385	0.935808	0.0277191	0.0266238
DISGENET	C0234238~Ache	9	1.63934	0.00123224	TRPA1, PENK, CRH, TRH, COMT, PDYN, TAC1, AQP1, GRIN1	429	49	9702	4.15385	0.935808	0.0277191	0.0266238
DISGENET	C0751408~Suffering, Physical	9	1.63934	0.00123224	TRPA1, PENK, CRH, TRH, COMT, PDYN, TAC1, AQP1, GRIN1	429	49	9702	4.15385	0.935808	0.0277191	0.0266238
DISGENET	C0458257~Pain, Splitting	9	1.63934	0.00123224	TRPA1, PENK, CRH, TRH, COMT, PDYN, TAC1, AQP1, GRIN1	429	49	9702	4.15385	0.935808	0.0277191	0.0266238
DISGENET	C0458259~Pain, Crushing	9	1.63934	0.00123224	TRPA1, PENK, CRH, TRH, COMT, PDYN, TAC1, AQP1, GRIN1	429	49	9702	4.15385	0.935808	0.0277191	0.0266238
DISGENET	C0027626~Neoplasm Invasiveness	19	3.46084	0.00126147	ITGB1, ANXA1, EPO, CXCR4, PAX6, HIF1A, MYLK, EPS8, MMP14, ZFP36, CXCL12, ZEB1, ADAMTS1, FTH1, NCAM1, VIM, ANGPTL4, ALDOA, MET	429	184	9702	2.33528	0.93986	0.028093	0.0269829
DISGENET	C0024668~Mammary Neoplasms, Experimental	17	3.09654	0.00131952	DDR1, SLC12A2, ANXA1, RASGRF2, PLK2, GATA3, PTN, PIK3R1, DUSP6, AQP1, GNAI2, KITLG, ALCAM, RASA1, SNCG, EZR, SGK1	429	155	9702	2.4804	0.947161	0.0290948	0.0279451
DISGENET	C0029231~Organic Mental Disorders, Substance-Induced	14	2.55009	0.00161835	OPRD1, FARP1, CSRNP3, DSCAM, PDE1C, PRKCE, NRXN3, GRIK2, OPRM1, ATP1B1, GRM5, NPY, CDH13, GRIA4	429	115	9702	2.75318	0.972866	0.0327642	0.0314695
DISGENET	C0038580~Substance Dependence	14	2.55009	0.00161835	OPRD1, FARP1, CSRNP3, DSCAM, PDE1C, PRKCE, NRXN3, GRIK2, OPRM1, ATP1B1, GRM5, NPY, CDH13, GRIA4	429	115	9702	2.75318	0.972866	0.0327642	0.0314695
DISGENET	C1510472~Drug Dependence	14	2.55009	0.00161835	OPRD1, FARP1, CSRNP3, DSCAM, PDE1C, PRKCE, NRXN3, GRIK2, OPRM1, ATP1B1, GRM5, NPY, CDH13, GRIA4	429	115	9702	2.75318	0.972866	0.0327642	0.0314695
DISGENET	C0038586~Substance Use Disorders	14	2.55009	0.00161835	OPRD1, FARP1, CSRNP3, DSCAM, PDE1C, PRKCE, NRXN3, GRIK2, OPRM1, ATP1B1, GRM5, NPY, CDH13, GRIA4	429	115	9702	2.75318	0.972866	0.0327642	0.0314695
DISGENET	C0013222~Drug Use Disorders	14	2.55009	0.00161835	OPRD1, FARP1, CSRNP3, DSCAM, PDE1C, PRKCE, NRXN3, GRIK2, OPRM1, ATP1B1, GRM5, NPY, CDH13, GRIA4	429	115	9702	2.75318	0.972866	0.0327642	0.0314695
DISGENET	C0236969~Substance-Related Disorders	14	2.55009	0.00161835	OPRD1, FARP1, CSRNP3, DSCAM, PDE1C, PRKCE, NRXN3, GRIK2, OPRM1, ATP1B1, GRM5, NPY, CDH13, GRIA4	429	115	9702	2.75318	0.972866	0.0327642	0.0314695
DISGENET	C4316881~Prescription Drug Abuse	14	2.55009	0.00161835	OPRD1, FARP1, CSRNP3, DSCAM, PDE1C, PRKCE, NRXN3, GRIK2, OPRM1, ATP1B1, GRM5, NPY, CDH13, GRIA4	429	115	9702	2.75318	0.972866	0.0327642	0.0314695
DISGENET	C0013170~Drug habituation	14	2.55009	0.00161835	OPRD1, FARP1, CSRNP3, DSCAM, PDE1C, PRKCE, NRXN3, GRIK2, OPRM1, ATP1B1, GRM5, NPY, CDH13, GRIA4	429	115	9702	2.75318	0.972866	0.0327642	0.0314695
DISGENET	C0013146~Drug abuse	14	2.55009	0.00161835	OPRD1, FARP1, CSRNP3, DSCAM, PDE1C, PRKCE, NRXN3, GRIK2, OPRM1, ATP1B1, GRM5, NPY, CDH13, GRIA4	429	115	9702	2.75318	0.972866	0.0327642	0.0314695
DISGENET	C0740858~Substance abuse problem	14	2.55009	0.0017515	OPRD1, FARP1, CSRNP3, DSCAM, PDE1C, PRKCE, NRXN3, GRIK2, OPRM1, ATP1B1, GRM5, NPY, CDH13, GRIA4	429	116	9702	2.72944	0.979839	0.0351404	0.0337519
DISGENET	C0017667~Nodular glomerulosclerosis	8	1.45719	0.00189272	PRKCE, SERPINE1, LEPR, ELMO1, KDR, TXNIP, GAS6, VEGFA	429	41	9702	4.41276	0.985288	0.0376348	0.0361476
DISGENET	C0751122~Infantile Severe Myoclonic Epilepsy	5	0.910747	0.00194297	GABRA1, STXBP1, PMP22, PCDH19, SCN1B	429	13	9702	8.69822	0.986848	0.0382919	0.0367788
DISGENET	C0086133~Depressive Syndrome	8	1.45719	0.00218678	RELN, CADM1, NPY, FTH1, CRH, NOS1, COMT, S100A10	429	42	9702	4.30769	0.992367	0.0427189	0.0410308
DISGENET	C0009402~Colorectal Carcinoma	48	8.74317	0.00251823	TENM1, PTPRU, SPARC, CSRNP3, LRP1, CLSTN2, TFRC, RASGRF2, CHD5, ADCY8, KALRN, GRM1, CDH5, GRIN2A, RASSF2, KDR, APOB, STK32C, UNC13B, CHST8, GRID2, CDKL5, NLGN4X, PTPRN2, SLC12A5, BCL11B, PRKCB, PRKCE, IGFBP3, ETV1, TNNI3K, AXIN2, MCC, PTPRD, CACNB2, SFRP1, DLC1, MAP1B, AKAP9, SLCO2A1, NEURL1, COL4A6, FAT1, CD9, ACKR3, KCNQ5, PRKD1, CDO1	429	702	9702	1.54635	0.996358	0.0485516	0.0466331
DISGENET	C1535926~Neurodevelopmental Disorders	12	2.18579	0.00252896	MEF2C, CDKL5, DSCAM, IQSEC2, MYT1L, DLG4, DOCK8, STXBP1, EEF1A2, DLGAP1, SLC6A1, GRIN2B	429	93	9702	2.91811	0.996444	0.0485516	0.0466331
DISGENET	C0026552~Morphine Dependence	4	0.728597	0.00261243	GRIA1, GRIN2A, NOS1, OPRM1	429	7	9702	12.9231	0.997049	0.049304	0.0473558
DISGENET	C0600272~Morphine Abuse	4	0.728597	0.00261243	GRIA1, GRIN2A, NOS1, OPRM1	429	7	9702	12.9231	0.997049	0.049304	0.0473558
DISGENET	C0011881~Diabetic Nephropathy	8	1.45719	0.00287958	PRKCE, SERPINE1, LEPR, ELMO1, KDR, TXNIP, GAS6, VEGFA	429	44	9702	4.11189	0.998375	0.0538894	0.0517599
DISGENET	C0033578~Prostatic Neoplasms	43	7.83242	0.0029975	DDR1, ROBO2, NRP1, NPR3, SERPINE1, FBLN1, PIK3R2, PIK3R1, COMT, HIF1A, CLU, PVR, SLC5A5, ROBO1, PODXL, UCP3, PENK, SPOCK1, TIMP4, SLC12A2, EGR1, ZFHX3, ANXA1, LAMB2, CAV1, IGFBP3, SERPINF1, ETV1, PAX6, EMP3, RGMB, JMJD6, VEGFA, OLFM1, CENPF, CXCL12, CD9, CDH13, VIM, EZR, SLC26A4, MET, FGF10	429	616	9702	1.57867	0.998751	0.0551689	0.0529889
DISGENET	C0376358~Malignant neoplasm of prostate	43	7.83242	0.0029975	DDR1, ROBO2, NRP1, NPR3, SERPINE1, FBLN1, PIK3R2, PIK3R1, COMT, HIF1A, CLU, PVR, SLC5A5, ROBO1, PODXL, UCP3, PENK, SPOCK1, TIMP4, SLC12A2, EGR1, ZFHX3, ANXA1, LAMB2, CAV1, IGFBP3, SERPINF1, ETV1, PAX6, EMP3, RGMB, JMJD6, VEGFA, OLFM1, CENPF, CXCL12, CD9, CDH13, VIM, EZR, SLC26A4, MET, FGF10	429	616	9702	1.57867	0.998751	0.0551689	0.0529889
DISGENET	C0220636~Malignant neoplasm of salivary gland	8	1.45719	0.00328346	JAG1, SLC24A3, SERPINF1, IGFBP2, FAT1, PRKD1, GAS6, AQP1	429	45	9702	4.02051	0.999341	0.0599366	0.0575682
DISGENET	C0038587~Substance Withdrawal Syndrome	9	1.63934	0.00370746	OPRD1, GRIA1, GRIN2A, NPY, CRH, ADCY1, SLC6A1, ADCY8, NPTX2	429	58	9702	3.50928	0.999744	0.0660522	0.0634421
DISGENET	C0087169~Withdrawal Symptoms	9	1.63934	0.00370746	OPRD1, GRIA1, GRIN2A, NPY, CRH, ADCY1, SLC6A1, ADCY8, NPTX2	429	58	9702	3.50928	0.999744	0.0660522	0.0634421
DISGENET	C0086189~Drug Withdrawal Symptoms	9	1.63934	0.00370746	OPRD1, GRIA1, GRIN2A, NPY, CRH, ADCY1, SLC6A1, ADCY8, NPTX2	429	58	9702	3.50928	0.999744	0.0660522	0.0634421
DISGENET	C1571984~Psychosis, Involutional	6	1.0929	0.00416999	RELN, GAL, GAD1, GAD2, CACNA1C, TAC1	429	25	9702	5.42769	0.999909	0.0725514	0.0696845
DISGENET	C1571983~Involutional paraphrenia	6	1.0929	0.00416999	RELN, GAL, GAD1, GAD2, CACNA1C, TAC1	429	25	9702	5.42769	0.999909	0.0725514	0.0696845
DISGENET	C0011574~Involutional Depression	6	1.0929	0.00416999	RELN, GAL, GAD1, GAD2, CACNA1C, TAC1	429	25	9702	5.42769	0.999909	0.0725514	0.0696845
DISGENET	C0036095~Salivary Gland Neoplasms	8	1.45719	0.00421935	JAG1, SLC24A3, SERPINF1, IGFBP2, FAT1, PRKD1, GAS6, AQP1	429	47	9702	3.84943	0.999919	0.072841	0.0699627
DISGENET	C0678222~Breast Carcinoma	38	6.92168	0.00460142	GPI, TFRC, CXCR4, GATA3, GRIK2, COMT, HIF1A, SLC5A5, GNAI2, CDH5, ERBB4, ADAMTS1, KDR, LEPR, SNCG, HES1, SLC16A3, JAG2, JUN, JAG1, CADM1, IGFBP5, CAV1, ARRDC3, NR2F1, ADAM10, JMJD6, EFNA1, PTPRD, SFRP1, MMP14, CENPF, ZEB1, CXCL12, VIM, ANGPTL4, ALDOA, FGF10	429	538	9702	1.59737	0.999965	0.0788258	0.075711
DISGENET	C0033975~Psychotic Disorders	12	2.18579	0.00481597	SLC12A2, CCKAR, SLC6A9, TENM4, FEZ1, GRIK4, ANK3, CACNA1C, OPRM1, CPLX2, SAT1, GRIN1	429	101	9702	2.68698	0.999979	0.0818715	0.0786364
DISGENET	C0041948~Uremia	5	0.910747	0.00562172	VCAM1, SPARC, EPO, KDR, SGK1	429	17	9702	6.65158	0.999996	0.0932817	0.0895956
DISGENET	C0038273~Stereotypic Movement Disorder	3	0.546448	0.0056547	MEF2C, CRH, TRH	429	3	9702	22.6154	0.999997	0.0932817	0.0895956
DISGENET	C0018672~Head Banging	3	0.546448	0.0056547	MEF2C, CRH, TRH	429	3	9702	22.6154	0.999997	0.0932817	0.0895956
DISGENET	C0005899~Body Rocking	3	0.546448	0.0056547	MEF2C, CRH, TRH	429	3	9702	22.6154	0.999997	0.0932817	0.0895956
DISGENET	C0009241~Cognition Disorders	7	1.27505	0.00591636	EPO, LAMB2, SLC1A1, CRH, MAPT, COMT, MET	429	38	9702	4.16599	0.999998	0.0968804	0.0930522
DISGENET	C0017636~Glioblastoma	10	1.82149	0.00775313	JAG2, JAG1, FAT1, CD9, HES1, GRIK2, HIF1A, MET, DUSP6, VEGFA	429	79	9702	2.86271	1	0.125612	0.120648
DISGENET	C1330966~Developmental Academic Disorder	6	1.0929	0.00806576	GRIA1, SLC17A6, SLC17A7, TRH, MAPT, VEGFA	429	29	9702	4.67905	1	0.125612	0.120648
DISGENET	C0751263~Learning Disturbance	6	1.0929	0.00806576	GRIA1, SLC17A6, SLC17A7, TRH, MAPT, VEGFA	429	29	9702	4.67905	1	0.125612	0.120648
DISGENET	C0751262~Adult Learning Disorders	6	1.0929	0.00806576	GRIA1, SLC17A6, SLC17A7, TRH, MAPT, VEGFA	429	29	9702	4.67905	1	0.125612	0.120648
DISGENET	C0023186~Learning Disorders	6	1.0929	0.00806576	GRIA1, SLC17A6, SLC17A7, TRH, MAPT, VEGFA	429	29	9702	4.67905	1	0.125612	0.120648
DISGENET	C0036337~Schizoaffective Disorder	6	1.0929	0.00806576	GRIA1, SST, NPY, CPLX2, SAT1, GRIN1	429	29	9702	4.67905	1	0.125612	0.120648
DISGENET	C0751265~Learning Disabilities	6	1.0929	0.00806576	GRIA1, SLC17A6, SLC17A7, TRH, MAPT, VEGFA	429	29	9702	4.67905	1	0.125612	0.120648
DISGENET	C0282126~Depression, Neurotic	7	1.27505	0.00862459	RELN, CADM1, NPY, FTH1, CRH, NOS1, S100A10	429	41	9702	3.86116	1	0.132462	0.127228
DISGENET	C0025193~Melancholia	7	1.27505	0.00862459	RELN, CADM1, NPY, FTH1, CRH, NOS1, S100A10	429	41	9702	3.86116	1	0.132462	0.127228
DISGENET	C0085762~Alcohol abuse	9	1.63934	0.00894795	GABRA1, CCKAR, GAL, NPY, CRH, PDE4B, OPRM1, COMT, PDYN	429	67	9702	3.03789	1	0.136487	0.131094
DISGENET	C1257931~Mammary Neoplasms, Human	36	6.55738	0.00918964	GPI, TFRC, CXCR4, GRIK2, COMT, HIF1A, SLC5A5, GNAI2, CDH5, ADAMTS1, KDR, LEPR, SNCG, HES1, SLC16A3, JAG2, JUN, JAG1, CADM1, IGFBP5, CAV1, ARRDC3, NR2F1, ADAM10, JMJD6, EFNA1, PTPRD, SFRP1, MMP14, CENPF, ZEB1, CXCL12, VIM, ANGPTL4, ALDOA, FGF10	429	525	9702	1.55077	1	0.138279	0.132815
DISGENET	C4704874~Mammary Carcinoma, Human	36	6.55738	0.00918964	GPI, TFRC, CXCR4, GRIK2, COMT, HIF1A, SLC5A5, GNAI2, CDH5, ADAMTS1, KDR, LEPR, SNCG, HES1, SLC16A3, JAG2, JUN, JAG1, CADM1, IGFBP5, CAV1, ARRDC3, NR2F1, ADAM10, JMJD6, EFNA1, PTPRD, SFRP1, MMP14, CENPF, ZEB1, CXCL12, VIM, ANGPTL4, ALDOA, FGF10	429	525	9702	1.55077	1	0.138279	0.132815
DISGENET	C1621958~Glioblastoma Multiforme	12	2.18579	0.00969698	JAG2, JAG1, PRKCB, FAT1, CD9, HES1, GRIK2, PIK3R1, HIF1A, MET, DUSP6, VEGFA	429	111	9702	2.44491	1	0.144934	0.139207
DISGENET	C1458155~Mammary Neoplasms	36	6.55738	0.00987537	GPI, TFRC, CXCR4, GRIK2, COMT, HIF1A, SLC5A5, GNAI2, CDH5, ADAMTS1, KDR, LEPR, SNCG, HES1, SLC16A3, JAG2, JUN, JAG1, CADM1, IGFBP5, CAV1, ARRDC3, NR2F1, ADAM10, JMJD6, EFNA1, PTPRD, SFRP1, MMP14, CENPF, ZEB1, CXCL12, VIM, ANGPTL4, ALDOA, FGF10	429	527	9702	1.54488	1	0.146616	0.140823
DISGENET	C0003873~Rheumatoid Arthritis	16	2.91439	0.00995531	NCF1, CCL21, IGFBP3, TNFAIP2, BGN, CXCR4, GATA3, RGMB, VEGFA, ACAN, TAGAP, DDIT4, KIF5A, TXNIP, ACKR3, PRKCQ	429	174	9702	2.07958	1	0.146824	0.141023
DISGENET	C1335167~Ovarian Mucinous Adenocarcinoma	6	1.0929	0.0107382	SBK1, RPS6KC1, SPEG, AATK, CDK14, MYLK	429	31	9702	4.37717	1	0.153782	0.147705
DISGENET	C0025261~Memory Disorders	7	1.27505	0.0108623	GABRA5, NPY, SLC17A6, SLC17A7, MAPT, COMT, VEGFA	429	43	9702	3.68157	1	0.153782	0.147705
DISGENET	C0751293~Memory Disorder, Semantic	7	1.27505	0.0108623	GABRA5, NPY, SLC17A6, SLC17A7, MAPT, COMT, VEGFA	429	43	9702	3.68157	1	0.153782	0.147705
DISGENET	C0751292~Age-Related Memory Disorders	7	1.27505	0.0108623	GABRA5, NPY, SLC17A6, SLC17A7, MAPT, COMT, VEGFA	429	43	9702	3.68157	1	0.153782	0.147705
DISGENET	C0751295~Memory Loss	7	1.27505	0.0108623	GABRA5, NPY, SLC17A6, SLC17A7, MAPT, COMT, VEGFA	429	43	9702	3.68157	1	0.153782	0.147705
DISGENET	C0751294~Memory Disorder, Spatial	7	1.27505	0.0108623	GABRA5, NPY, SLC17A6, SLC17A7, MAPT, COMT, VEGFA	429	43	9702	3.68157	1	0.153782	0.147705
DISGENET	C0392156~Akathisia	3	0.546448	0.0109795	ADCYAP1, CACNA1C, MAPT	429	4	9702	16.9615	1	0.153782	0.147705
DISGENET	C3887612~Psychomotor Agitation	3	0.546448	0.0109795	ADCYAP1, CACNA1C, MAPT	429	4	9702	16.9615	1	0.153782	0.147705
DISGENET	C0334588~Giant Cell Glioblastoma	10	1.82149	0.0114433	JAG2, JAG1, FAT1, CD9, HES1, GRIK2, HIF1A, MET, DUSP6, VEGFA	429	84	9702	2.69231	1	0.159276	0.152982
DISGENET	C0018798~Congenital Heart Defects	7	1.27505	0.0121227	EDNRA, JAG1, GNAQ, ECE1, PITX2, HIF1A, VEGFA	429	44	9702	3.5979	1	0.165628	0.159083
DISGENET	C0233794~Memory impairment	7	1.27505	0.0121227	GABRA5, NPY, SLC17A6, SLC17A7, MAPT, COMT, VEGFA	429	44	9702	3.5979	1	0.165628	0.159083
DISGENET	C0001956~Alcohol Use Disorder	7	1.27505	0.0121227	CCKAR, NPY, PDE4B, OPRM1, COMT, PDYN, SAT1	429	44	9702	3.5979	1	0.165628	0.159083
DISGENET	C0002395~Alzheimer's Disease	11	2.00364	0.0134216	RELN, MAOB, ADAMTS1, NPY, CRH, ADAM10, UNC5C, SLC2A4, MAPT, CLU, VEGFA	429	101	9702	2.46306	1	0.182256	0.175054
DISGENET	C1321905~Minimal Brain Dysfunction	5	0.910747	0.0145205	PTPRD, GRM5, COMT, FGD1, GRM1	429	22	9702	5.13986	1	0.194802	0.187105
DISGENET	C0041671~Attention Deficit Disorder	5	0.910747	0.0145205	PTPRD, GRM5, COMT, FGD1, GRM1	429	22	9702	5.13986	1	0.194802	0.187105
DISGENET	C0011573~Endogenous depression	7	1.27505	0.0149457	RELN, CADM1, NPY, FTH1, CRH, NOS1, S100A10	429	46	9702	3.44147	1	0.199305	0.19143
DISGENET	C1145670~Respiratory Failure	4	0.728597	0.0175208	TRH, MAPT, OPRM1, PDYN	429	13	9702	6.95858	1	0.229522	0.220453
DISGENET	C0235063~Respiratory Depression	4	0.728597	0.0175208	TRH, MAPT, OPRM1, PDYN	429	13	9702	6.95858	1	0.229522	0.220453
DISGENET	C0035229~Respiratory Insufficiency	4	0.728597	0.0175208	TRH, MAPT, OPRM1, PDYN	429	13	9702	6.95858	1	0.229522	0.220453
DISGENET	C0178417~Anhedonia	5	0.910747	0.0196837	CRH, SLC17A7, ANK3, CACNA1C, COMT	429	24	9702	4.71154	1	0.253385	0.243373
DISGENET	C1142166~Brugada Syndrome (disorder)	5	0.910747	0.0196837	CACNB2, KCNJ8, AKAP9, CACNA1C, SCN1B	429	24	9702	4.71154	1	0.253385	0.243373
DISGENET	C1263846~Attention deficit hyperactivity disorder	5	0.910747	0.0196837	PTPRD, GRM5, COMT, FGD1, GRM1	429	24	9702	4.71154	1	0.253385	0.243373
DISGENET	C0021368~Inflammation	12	2.18579	0.0244638	EGR1, ZFP36, GAL, TRPA1, TFRC, EPO, CCK, GATA3, ASIC2, TAC1, ASIC1, VEGFA	429	127	9702	2.13689	1	0.311533	0.299223
DISGENET	C1319315~Adenocarcinoma of large intestine	10	1.82149	0.0254712	CAMKV, ERBB4, PRKCB, DLC1, PRKCQ, AXIN2, TNNI3K, PIK3R1, MCC, MET	429	96	9702	2.35577	1	0.311533	0.299223
DISGENET	C0269102~Endometrioma	14	2.55009	0.0256614	ITGB1, NRP1, MAOB, DUSP1, SLC1A1, FBLN1, TRH, NR2F2, NR2C2, SULF2, SST, TXNIP, CNIH3, HBEGF	429	161	9702	1.96656	1	0.311533	0.299223
DISGENET	C0014175~Endometriosis	14	2.55009	0.0256614	ITGB1, NRP1, MAOB, DUSP1, SLC1A1, FBLN1, TRH, NR2F2, NR2C2, SULF2, SST, TXNIP, CNIH3, HBEGF	429	161	9702	1.96656	1	0.311533	0.299223
DISGENET	C0024232~Lymphatic Metastasis	5	0.910747	0.0258495	RASSF2, ANXA1, GRIK2, ANGPTL4, MET	429	26	9702	4.34911	1	0.311533	0.299223
DISGENET	C0428977~Bradycardia	5	0.910747	0.0258495	CRH, TRH, PDYN, TAC1, GNAI2	429	26	9702	4.34911	1	0.311533	0.299223
DISGENET	C0027686~Pathologic Neovascularization	3	0.546448	0.0258795	KDR, CLU, VEGFA	429	6	9702	11.3077	1	0.311533	0.299223
DISGENET	C0020594~Hypoactive Sexual Desire Disorder	3	0.546448	0.0258795	GRIA1, GRIK2, GRIA3	429	6	9702	11.3077	1	0.311533	0.299223
DISGENET	C0016722~Frigidity	3	0.546448	0.0258795	GRIA1, GRIK2, GRIA3	429	6	9702	11.3077	1	0.311533	0.299223
DISGENET	C0033953~Psychosexual Disorders	3	0.546448	0.0258795	GRIA1, GRIK2, GRIA3	429	6	9702	11.3077	1	0.311533	0.299223
DISGENET	C0036902~Sexual Arousal Disorder	3	0.546448	0.0258795	GRIA1, GRIK2, GRIA3	429	6	9702	11.3077	1	0.311533	0.299223
DISGENET	C0029261~Orgasmic Disorder	3	0.546448	0.0258795	GRIA1, GRIK2, GRIA3	429	6	9702	11.3077	1	0.311533	0.299223
DISGENET	C4707243~Familial thoracic aortic aneurysm and aortic dissection	7	1.27505	0.0283542	JAG1, COL11A1, BGN, PLOD1, PKD1, PRKG1, MYLK	429	53	9702	2.98694	1	0.339488	0.326073
DISGENET	C0020542~Pulmonary Hypertension	6	1.0929	0.0301419	KCNMA1, LEPR, HIF1A, KCNK3, CBLN2, PRKG1	429	40	9702	3.39231	1	0.351721	0.337823
DISGENET	C0011265~Presenile dementia	10	1.82149	0.0303381	RELN, MAOB, ADAMTS1, NPY, CRH, ADAM10, SLC2A4, MAPT, CLU, VEGFA	429	99	9702	2.28438	1	0.351721	0.337823
DISGENET	C0750900~Alzheimer's Disease, Focal Onset	10	1.82149	0.0303381	RELN, MAOB, ADAMTS1, NPY, CRH, ADAM10, SLC2A4, MAPT, CLU, VEGFA	429	99	9702	2.28438	1	0.351721	0.337823
DISGENET	C0494463~Alzheimer Disease, Late Onset	10	1.82149	0.0303381	RELN, MAOB, ADAMTS1, NPY, CRH, ADAM10, SLC2A4, MAPT, CLU, VEGFA	429	99	9702	2.28438	1	0.351721	0.337823
DISGENET	C0546126~Acute Confusional Senile Dementia	10	1.82149	0.0303381	RELN, MAOB, ADAMTS1, NPY, CRH, ADAM10, SLC2A4, MAPT, CLU, VEGFA	429	99	9702	2.28438	1	0.351721	0.337823
DISGENET	C0750901~Alzheimer Disease, Early Onset	10	1.82149	0.0303381	RELN, MAOB, ADAMTS1, NPY, CRH, ADAM10, SLC2A4, MAPT, CLU, VEGFA	429	99	9702	2.28438	1	0.351721	0.337823
DISGENET	C0025237~Melnick-Needles Syndrome	4	0.728597	0.0311132	COL11A1, KDR, HSPG2, VEGFA	429	16	9702	5.65385	1	0.351721	0.337823
DISGENET	C4551479~Schwartz-Jampel Syndrome, Type 1	4	0.728597	0.0311132	COL11A1, KDR, HSPG2, VEGFA	429	16	9702	5.65385	1	0.351721	0.337823
DISGENET	C3541456~Spondyloepiphyseal Dysplasia Tarda, X-Linked	4	0.728597	0.0311132	COL11A1, KDR, HSPG2, VEGFA	429	16	9702	5.65385	1	0.351721	0.337823
DISGENET	C0036391~Schwartz-Jampel Syndrome	4	0.728597	0.0311132	COL11A1, KDR, HSPG2, VEGFA	429	16	9702	5.65385	1	0.351721	0.337823
DISGENET	C0038015~Spondyloepiphyseal Dysplasia	4	0.728597	0.0311132	COL11A1, KDR, HSPG2, VEGFA	429	16	9702	5.65385	1	0.351721	0.337823
DISGENET	C0276496~Familial Alzheimer Disease (FAD)	10	1.82149	0.0320954	RELN, MAOB, ADAMTS1, NPY, CRH, ADAM10, SLC2A4, MAPT, CLU, VEGFA	429	100	9702	2.26154	1	0.360992	0.346728
DISGENET	C0919267~ovarian neoplasm	12	2.18579	0.0344883	EDNRA, SPARC, ZEB1, CAV1, DLC1, GRIK2, PIK3R1, SULF1, MET, SLC5A5, OPCML, JMJD6	429	134	9702	2.02526	1	0.385957	0.370706
DISGENET	C0427086~Involuntary Movements	3	0.546448	0.0351863	OPRM1, PDYN, GRIN1	429	7	9702	9.69231	1	0.38985	0.374445
DISGENET	C0233477~Dysphoric mood	3	0.546448	0.0351863	OPRM1, COMT, PDYN	429	7	9702	9.69231	1	0.38985	0.374445
DISGENET	C3887640~Astrocytosis	4	0.728597	0.0365756	ITGB1, ITGA4, LEPR, KCNK3	429	17	9702	5.32127	1	0.399284	0.383506
DISGENET	C0432272~Van Buchem disease	4	0.728597	0.0365756	COL11A1, KDR, HSPG2, VEGFA	429	17	9702	5.32127	1	0.399284	0.383506
DISGENET	C0017639~Gliosis	4	0.728597	0.0365756	ITGB1, ITGA4, LEPR, KCNK3	429	17	9702	5.32127	1	0.399284	0.383506
DISGENET	C1136249~Mental Retardation, X-Linked	5	0.910747	0.0370514	ARHGEF9, OPHN1, IQSEC2, PCDH19, FGD1	429	29	9702	3.8992	1	0.400551	0.384723
DISGENET	C0026650~Movement Disorders	5	0.910747	0.0370514	SLC12A2, CRH, CACNA1B, OPRM1, PDYN	429	29	9702	3.8992	1	0.400551	0.384723
DISGENET	C0009404~Colorectal Neoplasms	20	3.64299	0.037435	SPARC, TFRC, PRKCB, PRKCE, IGFBP3, CHD5, ETV1, AXIN2, PTPRD, CDH5, SFRP1, GRIN2A, DLC1, SLCO2A1, NEURL1, KDR, FAT1, CD9, ACKR3, PRKD1	429	277	9702	1.63288	1	0.402743	0.386828
DISGENET	C1140680~Malignant neoplasm of ovary	12	2.18579	0.0395656	EDNRA, SPARC, ZEB1, CAV1, DLC1, GRIK2, PIK3R1, SULF1, MET, SLC5A5, OPCML, JMJD6	429	137	9702	1.98091	1	0.423618	0.406879
DISGENET	C0024809~Marijuana Abuse	5	0.910747	0.0413153	GAL, PENK, NCAM1, COMT, PDYN	429	30	9702	3.76923	1	0.440235	0.422839
DISGENET	C0006142~Malignant neoplasm of breast	60	10.929	0.0417735	GPI, TENM1, SERPINE2, TFRC, RASGRF2, CHD5, GRIK2, PLOD1, COMT, ROBO1, CDH5, EDNRA, ADAMTS1, KDR, LEPR, SLC16A3, TNS1, IGFBP5, ARRDC3, BGN, ADAM10, JMJD6, SFRP1, MMP14, ZEB1, AKAP9, ADAM12, ANGPTL4, ALDOA, SEMA3A, COL11A1, CXCR4, GATA3, HIF1A, KALRN, SLC5A5, GNAI2, ERBB4, SNCG, SLC17A6, HES1, JAG2, GABRP, FARP1, JUN, JAG1, CADM1, CAV1, KCNIP3, NR2F1, SULF2, GRIN2D, SLC8A3, EFNA1, PTPRD, CENPF, CXC…	429	1074	9702	1.26343	1	0.442998	0.425493
DISGENET	C0003123~Anorexia	4	0.728597	0.0424948	NPY, CRH, CCK, TAC1	429	18	9702	5.02564	1	0.448511	0.430788
DISGENET	C0376280~Anxiety States, Neurotic	6	1.0929	0.043172	NPY, CRH, CARTPT, CACNA1C, MAPT, PAM	429	44	9702	3.08392	1	0.449271	0.431518
DISGENET	C1279420~Anxiety neurosis (finding)	6	1.0929	0.043172	NPY, CRH, CARTPT, CACNA1C, MAPT, PAM	429	44	9702	3.08392	1	0.449271	0.431518
DISGENET	C0003469~Anxiety Disorders	6	1.0929	0.043172	NPY, CRH, CARTPT, CACNA1C, MAPT, PAM	429	44	9702	3.08392	1	0.449271	0.431518
DISGENET	C0018818~Ventricular Septal Defects	3	0.546448	0.0455672	CITED2, EPO, PCSK5	429	8	9702	8.48077	1	0.471991	0.45334
DISGENET	C0236804~Amphetamine Addiction	8	1.45719	0.0468417	SLC6A9, PDE4B, CDH13, NOS1, OPRM1, COMT, PDYN, PRKG1	429	75	9702	2.41231	1	0.478516	0.459607
DISGENET	C0236807~Amphetamine Abuse	8	1.45719	0.0468417	SLC6A9, PDE4B, CDH13, NOS1, OPRM1, COMT, PDYN, PRKG1	429	75	9702	2.41231	1	0.478516	0.459607
DISGENET	C0236733~Amphetamine-Related Disorders	8	1.45719	0.0468417	SLC6A9, PDE4B, CDH13, NOS1, OPRM1, COMT, PDYN, PRKG1	429	75	9702	2.41231	1	0.478516	0.459607
DISGENET	C0038433~Streptozotocin Diabetes	10	1.82149	0.048741	NCF1, CAV1, PRKCE, SERPINE1, LEPR, TIMP2, ATP2A2, PAX6, SLC2A4, VEGFA	429	108	9702	2.09402	1	0.487946	0.468665
DISGENET	C0011853~Diabetes Mellitus, Experimental	10	1.82149	0.048741	NCF1, CAV1, PRKCE, SERPINE1, LEPR, TIMP2, ATP2A2, PAX6, SLC2A4, VEGFA	429	108	9702	2.09402	1	0.487946	0.468665
DISGENET	C0002152~Alloxan Diabetes	10	1.82149	0.048741	NCF1, CAV1, PRKCE, SERPINE1, LEPR, TIMP2, ATP2A2, PAX6, SLC2A4, VEGFA	429	108	9702	2.09402	1	0.487946	0.468665
DISGENET	C0013366~Dyschondroplasias	4	0.728597	0.0488615	COL11A1, KDR, HSPG2, VEGFA	429	19	9702	4.76113	1	0.487946	0.468665
DISGENET	C0029422~Osteochondrodysplasias	4	0.728597	0.0488615	COL11A1, KDR, HSPG2, VEGFA	429	19	9702	4.76113	1	0.487946	0.468665
DISGENET	C0026998~Acute Myeloid Leukemia, M1	11	2.00364	0.0492986	SPARC, PXDN, PDE4B, CD9, HSPB1, TRH, ATP1B1, SGK1, MET, PVR, S100A10	429	125	9702	1.99015	1	0.487946	0.468665
DISGENET	C1879321~Acute Myeloid Leukemia (AML-M2)	11	2.00364	0.0492986	SPARC, PXDN, PDE4B, CD9, HSPB1, TRH, ATP1B1, SGK1, MET, PVR, S100A10	429	125	9702	1.99015	1	0.487946	0.468665
DISGENET	C0345967~Malignant mesothelioma	10	1.82149	0.051159	CXCL12, FGD6, FTH1, PDPN, COL12A1, LTA, VIM, MET, PTPRF, WNT3	429	109	9702	2.07481	1	0.50412	0.484199
DISGENET	C0235527~Heart Failure, Right-Sided	10	1.82149	0.0536545	ITGB1, EDNRA, MSTN, ROCK2, SERPINE1, HSPB1, ATP2A2, ADRB1, HIF1A, VEGFA	429	110	9702	2.05594	1	0.515037	0.494685
DISGENET	C0018801~Heart failure	10	1.82149	0.0536545	ITGB1, EDNRA, MSTN, ROCK2, SERPINE1, HSPB1, ATP2A2, ADRB1, HIF1A, VEGFA	429	110	9702	2.05594	1	0.515037	0.494685
DISGENET	C1959583~Myocardial Failure	10	1.82149	0.0536545	ITGB1, EDNRA, MSTN, ROCK2, SERPINE1, HSPB1, ATP2A2, ADRB1, HIF1A, VEGFA	429	110	9702	2.05594	1	0.515037	0.494685
DISGENET	C0018802~Congestive heart failure	10	1.82149	0.0536545	ITGB1, EDNRA, MSTN, ROCK2, SERPINE1, HSPB1, ATP2A2, ADRB1, HIF1A, VEGFA	429	110	9702	2.05594	1	0.515037	0.494685
DISGENET	C1961112~Heart Decompensation	10	1.82149	0.0536545	ITGB1, EDNRA, MSTN, ROCK2, SERPINE1, HSPB1, ATP2A2, ADRB1, HIF1A, VEGFA	429	110	9702	2.05594	1	0.515037	0.494685
DISGENET	C0023212~Left-Sided Heart Failure	10	1.82149	0.0536545	ITGB1, EDNRA, MSTN, ROCK2, SERPINE1, HSPB1, ATP2A2, ADRB1, HIF1A, VEGFA	429	110	9702	2.05594	1	0.515037	0.494685
DISGENET	C0026760~Multiple Epiphyseal Dysplasia	4	0.728597	0.055665	COL11A1, KDR, HSPG2, VEGFA	429	20	9702	4.52308	1	0.532043	0.511019
DISGENET	C0017181~Gastrointestinal Hemorrhage	3	0.546448	0.0569096	SLC5A6, RELN, GAL	429	9	9702	7.53846	1	0.53931	0.517999
DISGENET	C4551637~Erythrocytosis familial, 1	3	0.546448	0.0569096	EGLN2, EPO, HIF1A	429	9	9702	7.53846	1	0.53931	0.517999
DISGENET	C0027051~Myocardial Infarction	9	1.63934	0.0580936	THBD, HSD11B2, LDHA, EPO, PRKCE, LTA, TIMP2, CREM, CKB	429	95	9702	2.14251	1	0.548197	0.526535
DISGENET	C4551993~Amyotrophic Lateral Sclerosis, Familial	6	1.0929	0.0591198	GABRA1, SHC1, PENK, VIM, CLU, GRIA3	429	48	9702	2.82692	1	0.553193	0.531333
DISGENET	C1862941~Amyotrophic Lateral Sclerosis, Sporadic	6	1.0929	0.0591198	GABRA1, SHC1, PENK, VIM, CLU, GRIA3	429	48	9702	2.82692	1	0.553193	0.531333
DISGENET	C0004096~Asthma	8	1.45719	0.0623858	HSD11B2, ADCYAP1R1, TRPA1, NPY, DNAH5, PDE4B, ADCY2, VEGFA	429	80	9702	2.26154	1	0.581311	0.55834
DISGENET	C3495559~Juvenile arthritis	11	2.00364	0.0638025	EGR1, JUN, DUSP1, RASGEF1B, PLK2, CREM, CXCR4, TNIK, TFPI, CLU, HBEGF	429	131	9702	1.899	1	0.584725	0.561619
DISGENET	C4704862~Polyarthritis, Juvenile, Rheumatoid Factor Positive	11	2.00364	0.0638025	EGR1, JUN, DUSP1, RASGEF1B, PLK2, CREM, CXCR4, TNIK, TFPI, CLU, HBEGF	429	131	9702	1.899	1	0.584725	0.561619
DISGENET	C3714758~Juvenile psoriatic arthritis	11	2.00364	0.0638025	EGR1, JUN, DUSP1, RASGEF1B, PLK2, CREM, CXCR4, TNIK, TFPI, CLU, HBEGF	429	131	9702	1.899	1	0.584725	0.561619
DISGENET	C4552091~Polyarthritis, Juvenile, Rheumatoid Factor Negative	11	2.00364	0.0638025	EGR1, JUN, DUSP1, RASGEF1B, PLK2, CREM, CXCR4, TNIK, TFPI, CLU, HBEGF	429	131	9702	1.899	1	0.584725	0.561619
DISGENET	C0038356~Stomach Neoplasms	20	3.64299	0.0663795	JUN, PRKCB, CAV1, IGFBP3, SERPINE1, HSPB1, PAX6, ADRB1, AXIN2, PTPRF, PTPRG, THBD, DLC1, EEF1A2, CKB, FAT4, SLC16A3, MET, PLPP1, HBEGF	429	297	9702	1.52292	1	0.605849	0.581909
DISGENET	C1862939~AMYOTROPHIC LATERAL SCLEROSIS 1	6	1.0929	0.0681964	GABRA1, SHC1, PENK, VIM, CLU, GRIA3	429	50	9702	2.71385	1	0.619892	0.595397
DISGENET	C0040427~Tooth Abnormalities	3	0.546448	0.0691091	LRP4, PAX6, PITX2	429	10	9702	6.78462	1	0.620591	0.596068
DISGENET	C0524730~Odontome	3	0.546448	0.0691091	LRP4, PAX6, PITX2	429	10	9702	6.78462	1	0.620591	0.596068
DISGENET	C1383860~Cardiac Hypertrophy	8	1.45719	0.069388	SHC1, ROCK2, PRKCB, CAV1, ATP2A2, SLC2A4, GAS6, HIF1A	429	82	9702	2.20638	1	0.620591	0.596068
DISGENET	C0018800~Cardiomegaly	8	1.45719	0.069388	SHC1, ROCK2, PRKCB, CAV1, ATP2A2, SLC2A4, GAS6, HIF1A	429	82	9702	2.20638	1	0.620591	0.596068
DISGENET	C0024623~Malignant neoplasm of stomach	20	3.64299	0.0716848	JUN, PRKCB, CAV1, IGFBP3, SERPINE1, HSPB1, PAX6, ADRB1, AXIN2, PTPRF, PTPRG, THBD, DLC1, EEF1A2, CKB, FAT4, SLC16A3, MET, PLPP1, HBEGF	429	300	9702	1.50769	1	0.638568	0.613335
DISGENET	C0007222~Cardiovascular Diseases	5	0.910747	0.0724377	SLC12A2, VCAM1, NPY, ADRB1, APOB	429	36	9702	3.14103	1	0.642704	0.617307
DISGENET	C0027746~Nerve Degeneration	8	1.45719	0.0730583	SLC5A6, GRM4, EPO, SLC1A1, DDIT4, CD9, NOS1, GRIN2D	429	83	9702	2.1798	1	0.645639	0.620126
DISGENET	C0087031~Juvenile-Onset Still Disease	11	2.00364	0.0748564	EGR1, JUN, DUSP1, RASGEF1B, PLK2, CREM, CXCR4, TNIK, TFPI, CLU, HBEGF	429	135	9702	1.84274	1	0.658914	0.632877
DISGENET	C1262477~Weight decreased	4	0.728597	0.0785629	EPO, NPY, CRH, MAPT	429	23	9702	3.93311	1	0.686116	0.659004
DISGENET	C0266487~Etat Marbre	4	0.728597	0.0785629	SLC12A2, CRH, OPRM1, PDYN	429	23	9702	3.93311	1	0.686116	0.659004
DISGENET	C0393702~Myoclonic Astatic Epilepsy	3	0.546448	0.0820683	STXBP1, PMP22, SLC6A1	429	11	9702	6.16783	1	0.698962	0.671343
DISGENET	C2748542~CARDIAC CONDUCTION DEFECT, NONSPECIFIC (disorder)	3	0.546448	0.0820683	CACNB2, KCNJ8, SCN1B	429	11	9702	6.16783	1	0.698962	0.671343
DISGENET	C1399226~Ectopic rhythm	3	0.546448	0.0820683	CACNB2, KCNJ8, SCN1B	429	11	9702	6.16783	1	0.698962	0.671343
DISGENET	C0151879~Shortened QT interval	3	0.546448	0.0820683	CACNB2, KCNJ8, CACNA1C	429	11	9702	6.16783	1	0.698962	0.671343
DISGENET	C0348626~Other specified cardiac arrhythmias	3	0.546448	0.0820683	CACNB2, KCNJ8, SCN1B	429	11	9702	6.16783	1	0.698962	0.671343
DISGENET	C0264893~Nodal rhythm disorder	3	0.546448	0.0820683	CACNB2, KCNJ8, SCN1B	429	11	9702	6.16783	1	0.698962	0.671343
DISGENET	C0033141~Cardiomyopathies, Primary	7	1.27505	0.0830805	ITGB1, ADCYAP1, LDHA, EPO, PRKCE, RHOJ, MAPT	429	69	9702	2.29431	1	0.698962	0.671343
DISGENET	C0349204~Nonorganic psychosis	7	1.27505	0.0830805	SLC6A9, TENM4, GRIK4, ANK3, CACNA1C, OPRM1, SAT1	429	69	9702	2.29431	1	0.698962	0.671343
DISGENET	C0036529~Myocardial Diseases, Secondary	7	1.27505	0.0830805	ITGB1, ADCYAP1, LDHA, EPO, PRKCE, RHOJ, MAPT	429	69	9702	2.29431	1	0.698962	0.671343
DISGENET	C0020649~Hypotension	6	1.0929	0.0831724	GRIA1, MAOB, CRH, PDYN, TAC1, GRIN2B	429	53	9702	2.56023	1	0.698962	0.671343
DISGENET	C0376634~Craniofacial Abnormalities	12	2.18579	0.0839175	JAG2, EDNRA, FGF8, ANXA1, COL11A1, GNAQ, ECE1, PAX6, ZIC5, PITX2, HSPG2, FGD1	429	156	9702	1.73964	1	0.702572	0.67481
DISGENET	C0038505~Sturge-Weber Syndrome	2	0.364299	0.0862875	RASA1, GNAQ	429	2	9702	22.6154	1	0.711712	0.683589
DISGENET	C0008677~Bronchitis, Chronic	2	0.364299	0.0862875	NPY, VEGFA	429	2	9702	22.6154	1	0.711712	0.683589
DISGENET	C0041657~Unconscious State	2	0.364299	0.0862875	CCK, TRH	429	2	9702	22.6154	1	0.711712	0.683589
DISGENET	C0235752~Port-Wine Stain	2	0.364299	0.0862875	RASA1, GNAQ	429	2	9702	22.6154	1	0.711712	0.683589
DISGENET	C0887833~Carcinoma, Pancreatic Ductal	4	0.728597	0.0869742	JAG2, JAG1, HES1, VEGFA	429	24	9702	3.76923	1	0.712101	0.683962
DISGENET	C0037769~West Syndrome	4	0.728597	0.0869742	CDKL5, STXBP1, CRH, GRIN2B	429	24	9702	3.76923	1	0.712101	0.683962
DISGENET	C4721453~Peripheral Nervous System Diseases	6	1.0929	0.0885209	JUN, NPY, PRKCE, PMP22, CACNA1B, RHOBTB2	429	54	9702	2.51282	1	0.72211	0.693576
DISGENET	C0022658~Kidney Diseases	8	1.45719	0.0930976	SPARC, ANXA1, EPO, LEPR, ACKR3, PCSK5, CLU, GLIS2	429	88	9702	2.05594	1	0.756673	0.726773
DISGENET	C0085580~Essential Hypertension	3	0.546448	0.0956968	RGS5, ECE1, ATP1B1	429	12	9702	5.65385	1	0.761131	0.731055
DISGENET	C0525041~Neurobehavioral Manifestations	3	0.546448	0.0956968	CCK, NOS1, NTN1	429	12	9702	5.65385	1	0.761131	0.731055
DISGENET	C0004936~Mental disorders	3	0.546448	0.0956968	DTNBP1, NOS1, COMT	429	12	9702	5.65385	1	0.761131	0.731055
DISGENET	C0004930~Behavior Disorders	3	0.546448	0.0956968	DTNBP1, NOS1, COMT	429	12	9702	5.65385	1	0.761131	0.731055
DISGENET	C0376338~Diagnosis, Psychiatric	3	0.546448	0.0956968	DTNBP1, NOS1, COMT	429	12	9702	5.65385	1	0.761131	0.731055
DISGENET	C4046029~Mental Disorders, Severe	3	0.546448	0.0956968	DTNBP1, NOS1, COMT	429	12	9702	5.65385	1	0.761131	0.731055
DISGENET	C0035126~Reperfusion Injury	8	1.45719	0.09744	EFNB2, EGR1, JUN, KDR, HSPB1, VIM, EFNA5, HBEGF	429	89	9702	2.03284	1	0.770067	0.739638
DISGENET	C1708349~Hereditary Diffuse Gastric Cancer	19	3.46084	0.0975118	JUN, PRKCB, CAV1, IGFBP3, SERPINE1, HSPB1, PAX6, ADRB1, PTPRF, PTPRG, THBD, DLC1, EEF1A2, CKB, FAT4, SLC16A3, MET, PLPP1, HBEGF	429	293	9702	1.46653	1	0.770067	0.739638
DISGENET	C0027627~Neoplasm Metastasis	15	2.73224	0.0990232	ITGB1, ANXA1, EPO, CAV1, CXCR4, SLC7A11, VEGFA, MYLK, CXCL12, ACKR3, VIM, ANGPTL4, ALDOA, EZR, MET	429	217	9702	1.56328	1	0.779239	0.748448

## Sheet: Gill GO
Category	Term	Count	%	p-value	Genes	List Total	Pop Hits	Pop Total	Fold Enrichment	Bonferroni	Benjamini	FDR
DISGENET	C2239176~Liver carcinoma	56	29.9465	5.70043e-32	TOP2A, KIF14, IRS2, ENO1, KIF11, MKI67, KIF15, CDC20, PTTG1, MYC, STMN1, NUF2, NUSAP1, DLGAP5, KIF23, ASPM, SFRP1, PKM, KIFC1, BIRC5, KIF20A, MCM2, CDCA2, CDCA3, UHRF1, GSTP1, NCAPG, CDCA8, TTK, PTGS2, NCAPH, AURKB, AURKA, CCNB1, PGK1, FAM83D, RRM1, RRM2, VCAM1, UBE2C, PLK1, IGF2, NDC80, ZWINT, CENPE, ANLN, TPX2, CENPF, CXCL12, PRC1, CYP1A1, CDK1, TACC3, SPC25, EZH2, MAD2L1	156	507	9702	6.86937	5.89425e-29	5.89425e-29	5.82014e-29
DISGENET	C4704874~Mammary Carcinoma, Human	25	13.369	2.75281e-06	TOP2A, GSTP1, ENO1, MKI67, PTGS2, HIF1A, AURKA, LOXL2, STMN1, CYP1B1, CPT1A, IGFBP5, UBE2C, DIO3, MIF, JMJD6, SFRP1, CENPF, CXCL12, PRC1, FABP7, CYP1A1, BIRC5, ALDOA, EZH2	156	525	9702	2.96154	0.00284236	0.000760301	0.000750742
DISGENET	C1257931~Mammary Neoplasms, Human	25	13.369	2.75281e-06	TOP2A, GSTP1, ENO1, MKI67, PTGS2, HIF1A, AURKA, LOXL2, STMN1, CYP1B1, CPT1A, IGFBP5, UBE2C, DIO3, MIF, JMJD6, SFRP1, CENPF, CXCL12, PRC1, FABP7, CYP1A1, BIRC5, ALDOA, EZH2	156	525	9702	2.96154	0.00284236	0.000760301	0.000750742
DISGENET	C1458155~Mammary Neoplasms	25	13.369	2.9412e-06	TOP2A, GSTP1, ENO1, MKI67, PTGS2, HIF1A, AURKA, LOXL2, STMN1, CYP1B1, CPT1A, IGFBP5, UBE2C, DIO3, MIF, JMJD6, SFRP1, CENPF, CXCL12, PRC1, FABP7, CYP1A1, BIRC5, ALDOA, EZH2	156	527	9702	2.9503	0.00303659	0.000760301	0.000750742
DISGENET	C0678222~Breast Carcinoma	25	13.369	4.20574e-06	TOP2A, GSTP1, ENO1, MKI67, PTGS2, HIF1A, AURKA, LOXL2, STMN1, CYP1B1, CPT1A, IGFBP5, UBE2C, DIO3, MIF, JMJD6, SFRP1, CENPF, CXCL12, PRC1, FABP7, CYP1A1, BIRC5, ALDOA, EZH2	156	538	9702	2.88998	0.0043393	0.000869746	0.000858811
DISGENET	C0009404~Colorectal Neoplasms	16	8.55615	3.52267e-05	POSTN, FEN1, RRM2, IGF2, MKI67, PTGS2, AURKA, SFRP1, MYC, NUSAP1, CD9, CYP1B1, BIRC5, CALR, POLE, PGM1	156	277	9702	3.59234	0.0357697	0.00607074	0.00599442
DISGENET	C0029463~Osteosarcoma	7	3.74332	9.43438e-05	CCNB3, WRN, LOX, MYC, GSTP1, EZH2, VEGFA	156	47	9702	9.26268	0.0929485	0.0123124	0.0121576
DISGENET	C0033578~Prostatic Neoplasms	24	12.8342	0.000112987	TOP2A, GSTP1, PDE4D, ZBTB16, MBD1, MIF, PTGS2, BMP7, HIF1A, AURKA, JMJD6, VEGFA, CENPF, CXCL12, MYC, STMN1, CYP1A1, CD9, CYP1B1, BIRC5, IGFBP6, CALR, MAD1L1, EZH2	156	616	9702	2.42308	0.110268	0.0123124	0.0121576
DISGENET	C0376358~Malignant neoplasm of prostate	24	12.8342	0.000112987	TOP2A, GSTP1, PDE4D, ZBTB16, MBD1, MIF, PTGS2, BMP7, HIF1A, AURKA, JMJD6, VEGFA, CENPF, CXCL12, MYC, STMN1, CYP1A1, CD9, CYP1B1, BIRC5, IGFBP6, CALR, MAD1L1, EZH2	156	616	9702	2.42308	0.110268	0.0123124	0.0121576
DISGENET	C0011616~Contact Dermatitis	8	4.27807	0.000130983	HDAC4, UGT1A1, GSTP1, FTH1, CYP1A1, CYP1B1, IGFBP6, VEGFA	156	71	9702	7.00758	0.126673	0.0123124	0.0121576
DISGENET	C0162351~Contact hypersensitivity	8	4.27807	0.000130983	HDAC4, UGT1A1, GSTP1, FTH1, CYP1A1, CYP1B1, IGFBP6, VEGFA	156	71	9702	7.00758	0.126673	0.0123124	0.0121576
DISGENET	C0520572~Enzymopathy	4	2.13904	0.000600624	TPI1, KIF23, ENO1, ALDOA	156	11	9702	22.6154	0.462718	0.0517538	0.0511031
DISGENET	C0007137~Squamous cell carcinoma	9	4.81283	0.000814993	TPI1, MYC, CSNK2A2, CYP1B1, BIRC5, ENO1, PTGS2, KNSTRN, VEGFA	156	124	9702	4.51396	0.569602	0.0609962	0.0602293
DISGENET	C0017919~Glycogen Storage Disease	5	2.6738	0.000825868	LDHA, PFKL, PGK1, ALDOA, PGM1	156	27	9702	11.5171	0.574419	0.0609962	0.0602293
DISGENET	C0006142~Malignant neoplasm of breast	31	16.5775	0.00154042	HDAC4, TOP2A, PFKFB4, GSTP1, PLOD1, ENO1, MKI67, PTGS2, HIF1A, AURKA, LOXL2, STMN1, CYP1B1, CLSPN, CPT1A, IGFBP5, UBE2C, P3H2, DIO3, MIF, JMJD6, PER2, SFRP1, CENPF, CXCL12, PRC1, FABP7, CYP1A1, BIRC5, ALDOA, EZH2	156	1074	9702	1.79512	0.796893	0.106186	0.104851
DISGENET	C0032460~Polycystic Ovary Syndrome	9	4.81283	0.00213101	TOP2A, ASPM, ANLN, CCNB1, RRM2, LMNA, PDE3B, TTK, MAD2L1	156	144	9702	3.88702	0.889839	0.129615	0.127986
DISGENET	C1136382~Sclerocystic Ovaries	9	4.81283	0.00213101	TOP2A, ASPM, ANLN, CCNB1, RRM2, LMNA, PDE3B, TTK, MAD2L1	156	144	9702	3.88702	0.889839	0.129615	0.127986
DISGENET	C0027626~Neoplasm Invasiveness	10	5.34759	0.00272984	PKM, CXCL12, ZBTB16, FTH1, HMGA2, ENO1, CALR, ALDOA, HIF1A, LOXL2	156	184	9702	3.38002	0.940781	0.156814	0.154843
DISGENET	C0279626~Squamous cell carcinoma of esophagus	7	3.74332	0.00407717	CYP26B1, TPI1, CALR, PTGS2, HIF1A, LOXL2, MAD2L1	156	95	9702	4.58259	0.985366	0.203865	0.201302
DISGENET	C0205696~Anaplastic carcinoma	9	4.81283	0.00455834	PKM, MYC, GSTP1, STMN1, SLC25A10, ENO1, MIF, PTGS2, HIF1A	156	163	9702	3.43393	0.991121	0.203865	0.201302
DISGENET	C0205697~Carcinoma, Spindle-Cell	9	4.81283	0.00455834	PKM, MYC, GSTP1, STMN1, SLC25A10, ENO1, MIF, PTGS2, HIF1A	156	163	9702	3.43393	0.991121	0.203865	0.201302
DISGENET	C0205699~Carcinomatosis	9	4.81283	0.00455834	PKM, MYC, GSTP1, STMN1, SLC25A10, ENO1, MIF, PTGS2, HIF1A	156	163	9702	3.43393	0.991121	0.203865	0.201302
DISGENET	C0205698~Undifferentiated carcinoma	9	4.81283	0.00455834	PKM, MYC, GSTP1, STMN1, SLC25A10, ENO1, MIF, PTGS2, HIF1A	156	163	9702	3.43393	0.991121	0.203865	0.201302
DISGENET	C0007097~Carcinoma	9	4.81283	0.00473333	PKM, MYC, GSTP1, STMN1, SLC25A10, ENO1, MIF, PTGS2, HIF1A	156	164	9702	3.41299	0.992597	0.203865	0.201302
DISGENET	C0555198~Malignant Glioma	6	3.20856	0.0051262	TOP2A, GSTP1, FTH1, PLK1, STMN1, PTGS2	156	70	9702	5.33077	0.995078	0.203865	0.201302
DISGENET	C0259783~mixed gliomas	6	3.20856	0.0051262	TOP2A, GSTP1, FTH1, PLK1, STMN1, PTGS2	156	70	9702	5.33077	0.995078	0.203865	0.201302
DISGENET	C0151744~Myocardial Ischemia	9	4.81283	0.00718455	HADHA, VCAM1, RGCC, GSTP1, PDE4B, CALR, ALDOA, PGM1, VEGFA	156	176	9702	3.18029	0.999422	0.252969	0.249788
DISGENET	C0011570~Mental Depression	11	5.88235	0.00750944	PER2, HDAC4, LDHA, SFRP1, PDE4D, STMN1, PDE4B, PTGS2, SLC6A2, HIF1A, VEGFA	156	254	9702	2.69337	0.999588	0.252969	0.249788
DISGENET	C0038433~Streptozotocin Diabetes	7	3.74332	0.00758416	CPT1A, NCF1, AIFM1, CYP1A1, IRS2, PTGS2, VEGFA	156	108	9702	4.03098	0.999619	0.252969	0.249788
DISGENET	C0002152~Alloxan Diabetes	7	3.74332	0.00758416	CPT1A, NCF1, AIFM1, CYP1A1, IRS2, PTGS2, VEGFA	156	108	9702	4.03098	0.999619	0.252969	0.249788
DISGENET	C0011853~Diabetes Mellitus, Experimental	7	3.74332	0.00758416	CPT1A, NCF1, AIFM1, CYP1A1, IRS2, PTGS2, VEGFA	156	108	9702	4.03098	0.999619	0.252969	0.249788
DISGENET	C0009402~Colorectal Carcinoma	21	11.2299	0.00810309	POSTN, FEN1, RRM2, IGF2, NCAPG, MKI67, PTGS2, AURKA, CCNB3, TPX2, SFRP1, WRN, MYC, NUSAP1, CD9, CYP1B1, BIRC5, CALR, CDO1, POLE, PGM1	156	702	9702	1.86045	0.999778	0.261831	0.258539
DISGENET	C0205643~Carcinoma, Cribriform	7	3.74332	0.0106046	PCNA, MYC, BIRC5, ENO1, MKI67, PTGS2, VEGFA	156	116	9702	3.75298	0.999984	0.288556	0.284928
DISGENET	C0001418~Adenocarcinoma	7	3.74332	0.0106046	PCNA, MYC, BIRC5, ENO1, MKI67, PTGS2, VEGFA	156	116	9702	3.75298	0.999984	0.288556	0.284928
DISGENET	C0205641~Adenocarcinoma, Basal Cell	7	3.74332	0.0106046	PCNA, MYC, BIRC5, ENO1, MKI67, PTGS2, VEGFA	156	116	9702	3.75298	0.999984	0.288556	0.284928
DISGENET	C0205644~Carcinoma, Granular Cell	7	3.74332	0.0106046	PCNA, MYC, BIRC5, ENO1, MKI67, PTGS2, VEGFA	156	116	9702	3.75298	0.999984	0.288556	0.284928
DISGENET	C0205642~Adenocarcinoma, Oxyphilic	7	3.74332	0.0106046	PCNA, MYC, BIRC5, ENO1, MKI67, PTGS2, VEGFA	156	116	9702	3.75298	0.999984	0.288556	0.284928
DISGENET	C0205645~Adenocarcinoma, Tubular	7	3.74332	0.0106046	PCNA, MYC, BIRC5, ENO1, MKI67, PTGS2, VEGFA	156	116	9702	3.75298	0.999984	0.288556	0.284928
DISGENET	C0009375~Colonic Neoplasms	8	4.27807	0.0109575	PCNA, MYC, IGF2, BIRC5, MKI67, PTGS2, MCM2, VEGFA	156	152	9702	3.27328	0.999989	0.290514	0.286861
DISGENET	C0007131~Non-Small Cell Lung Carcinoma	8	4.27807	0.01245	RRM1, MYC, GSTP1, CD9, BIRC5, ENO1, HIF1A, VEGFA	156	156	9702	3.18935	0.999998	0.318253	0.314252
DISGENET	C0017638~Glioma	6	3.20856	0.0126193	TOP2A, GSTP1, FTH1, PLK1, STMN1, PTGS2	156	87	9702	4.28912	0.999998	0.318253	0.314252
DISGENET	C0007102~Malignant tumor of colon	8	4.27807	0.0137196	PCNA, MYC, IGF2, BIRC5, MKI67, PTGS2, MCM2, VEGFA	156	159	9702	3.12917	0.999999	0.337764	0.333517
DISGENET	C0007114~Malignant neoplasm of skin	5	2.6738	0.0144465	CSNK2A2, PTK2B, PTGS2, POLE, HIF1A	156	59	9702	5.27053	1	0.339492	0.335224
DISGENET	C0037286~Skin Neoplasms	5	2.6738	0.0144465	CSNK2A2, PTK2B, PTGS2, POLE, HIF1A	156	59	9702	5.27053	1	0.339492	0.335224
DISGENET	C0026636~Mouth Diseases	3	1.60428	0.0150685	CYP26B1, DDIT4, PTGS2	156	12	9702	15.5481	1	0.346241	0.341888
DISGENET	C0006826~Malignant Neoplasms	7	3.74332	0.0166056	WRN, UGT1A1, MYC, HMGA2, PTGS2, AURKA, VEGFA	156	128	9702	3.40114	1	0.373264	0.368571
DISGENET	C0152013~Adenocarcinoma of lung (disorder)	9	4.81283	0.0174121	TOP2A, RRM1, LDHA, RRM2, TPI1, MYC, LMNA, ENO1, ALDOA	156	206	9702	2.71714	1	0.383067	0.37825
DISGENET	C0027659~Neoplasms, Experimental	5	2.6738	0.0210076	PCNA, KIF11, HIF1A, TOB1, VEGFA	156	66	9702	4.71154	1	0.452539	0.44685
DISGENET	C0005695~Bladder Neoplasm	7	3.74332	0.0246218	HDAC4, IGFBP5, ESPL1, MYC, GSTP1, TACC3, PTGS2	156	140	9702	3.10962	1	0.519571	0.513038
DISGENET	C0005684~Malignant neoplasm of urinary bladder	7	3.74332	0.0253887	HDAC4, IGFBP5, ESPL1, MYC, GSTP1, TACC3, PTGS2	156	141	9702	3.08756	1	0.525038	0.518437
DISGENET	C0476089~Endometrial Carcinoma	5	2.6738	0.0278819	MYC, BIRC5, POLE, EZH2, VEGFA	156	72	9702	4.31891	1	0.565292	0.558185
DISGENET	C0020538~Hypertensive disease	8	4.27807	0.0325936	HSD11B2, VCAM1, NCF1, GSTP1, CYP1A1, PTGS2, SLC6A2, HIF1A	156	190	9702	2.61862	1	0.64026	0.63221
DISGENET	C0206686~Adrenocortical carcinoma	3	1.60428	0.032818	TOP2A, RRM1, IGF2	156	18	9702	10.3654	1	0.64026	0.63221
DISGENET	C0004096~Asthma	5	2.6738	0.0389139	HSD11B2, GSTP1, PDE4D, PDE4B, VEGFA	156	80	9702	3.88702	1	0.745129	0.73576
DISGENET	C0007112~Adenocarcinoma of prostate	3	1.60428	0.0399196	MYC, MAD1L1, AURKA	156	20	9702	9.32885	1	0.750489	0.741053
DISGENET	C0011581~Depressive disorder	10	5.34759	0.042023	PER2, SFRP1, PDE4D, FTH1, STMN1, PDE4B, MIF, PTGS2, SLC6A2, VEGFA	156	289	9702	2.15198	1	0.775925	0.76617
DISGENET	C0334588~Giant Cell Glioblastoma	5	2.6738	0.045242	MYC, TACC3, CD9, HIF1A, VEGFA	156	84	9702	3.70192	1	0.805883	0.795751
DISGENET	C0473935~Radiolabeled somatostatin analog study	2	1.06952	0.0471714	IGF2, HMGA2	156	3	9702	41.4615	1	0.805883	0.795751
DISGENET	C0036939~Shared Paranoid Disorder	2	1.06952	0.0471714	GSTP1, CALR	156	3	9702	41.4615	1	0.805883	0.795751
DISGENET	C3711387~Autosomal Recessive Primary Microcephaly	3	1.60428	0.0475424	ASPM, KIF14, NCAPD3	156	22	9702	8.48077	1	0.805883	0.795751
DISGENET	C0019829~Hodgkin Disease	3	1.60428	0.0475424	UGT1A1, GSTP1, CDK2	156	22	9702	8.48077	1	0.805883	0.795751
DISGENET	C0038356~Stomach Neoplasms	10	5.34759	0.0485	MYC, GSTP1, BIRC5, IRS2, ALDOB, ENO1, PTGS2, POLE, BMP7, AURKB	156	297	9702	2.09402	1	0.808854	0.798685
DISGENET	C1168401~Squamous cell carcinoma of the head and neck	4	2.13904	0.0500525	CCNA2, CCNB1, CDK2, PTGS2	156	52	9702	4.78402	1	0.821496	0.811168
DISGENET	C0024623~Malignant neoplasm of stomach	10	5.34759	0.0510911	MYC, GSTP1, BIRC5, IRS2, ALDOB, ENO1, PTGS2, POLE, BMP7, AURKB	156	300	9702	2.07308	1	0.82544	0.815062
DISGENET	C0525045~Mood Disorders	7	3.74332	0.0524053	HDAC4, LDHA, PFKL, PTGS2, SLC6A2, HIF1A, VEGFA	156	168	9702	2.59135	1	0.833648	0.823167
DISGENET	C0026640~Mouth Neoplasms	4	2.13904	0.0549134	TPI1, CYP1B1, ENO1, PTGS2	156	54	9702	4.60684	1	0.84747	0.836815
DISGENET	C0153381~Malignant neoplasm of mouth	4	2.13904	0.0549134	TPI1, CYP1B1, ENO1, PTGS2	156	54	9702	4.60684	1	0.84747	0.836815
DISGENET	C0041696~Unipolar Depression	9	4.81283	0.0557346	LDHA, ZBTB16, FTH1, DDIT4, MIF, PTGS2, SLC6A2, HIF1A, BMP7	156	259	9702	2.16112	1	0.847494	0.836839
DISGENET	C0079744~Diffuse Large B-Cell Lymphoma	4	2.13904	0.0574257	MYC, CDK2, CDK1, EZH2	156	55	9702	4.52308	1	0.860553	0.849734
DISGENET	C0003873~Rheumatoid Arthritis	7	3.74332	0.0601175	NCF1, NCF2, DDIT4, ENO1, MIF, PTGS2, VEGFA	156	174	9702	2.50199	1	0.885609	0.874475
DISGENET	C0796160~MENTAL RETARDATION, X-LINKED, SNYDER-ROBINSON TYPE	2	1.06952	0.0623986	IGF2, HMGA2	156	4	9702	31.0962	1	0.885609	0.874475
DISGENET	C0033860~Psoriasis	4	2.13904	0.0626107	PCNA, PTTG1, MKI67, VEGFA	156	57	9702	4.36437	1	0.885609	0.874475
DISGENET	C0030246~Pustulosis of Palms and Soles	4	2.13904	0.0626107	PCNA, PTTG1, MKI67, VEGFA	156	57	9702	4.36437	1	0.885609	0.874475
DISGENET	C0919267~ovarian neoplasm	6	3.20856	0.0633801	PRC1, MYC, CYP1B1, BIRC5, MKI67, JMJD6	156	134	9702	2.78473	1	0.885609	0.874475
DISGENET	C0014170~Endometrial Neoplasms	4	2.13904	0.0652823	MYC, BIRC5, EZH2, VEGFA	156	58	9702	4.28912	1	0.893496	0.882262
DISGENET	C1563937~Atherogenesis	4	2.13904	0.0680056	VCAM1, IGF2, PTGS2, VEGFA	156	59	9702	4.21643	1	0.893496	0.882262
DISGENET	C0004153~Atherosclerosis	4	2.13904	0.0680056	VCAM1, IGF2, PTGS2, VEGFA	156	59	9702	4.21643	1	0.893496	0.882262
DISGENET	C1140680~Malignant neoplasm of ovary	6	3.20856	0.068338	PRC1, MYC, CYP1B1, BIRC5, MKI67, JMJD6	156	137	9702	2.72375	1	0.893496	0.882262
DISGENET	C0027726~Nephrotic Syndrome	3	1.60428	0.0686236	HSD11B2, NCK2, NUP37	156	27	9702	6.91026	1	0.893496	0.882262
DISGENET	C0678807~prenatal alcohol exposure	2	1.06952	0.077384	IGF2, VEGFA	156	5	9702	24.8769	1	0.893496	0.882262
DISGENET	C0752308~Hypoxia-Ischemia, Brain	2	1.06952	0.077384	HIF1A, VEGFA	156	5	9702	24.8769	1	0.893496	0.882262
DISGENET	C0002938~Aneuploidy	2	1.06952	0.077384	KIF11, AURKA	156	5	9702	24.8769	1	0.893496	0.882262
DISGENET	C0752306~Anoxia-Ischemia, Brain	2	1.06952	0.077384	HIF1A, VEGFA	156	5	9702	24.8769	1	0.893496	0.882262
DISGENET	C0752304~Hypoxic-Ischemic Encephalopathy	2	1.06952	0.077384	HIF1A, VEGFA	156	5	9702	24.8769	1	0.893496	0.882262
DISGENET	C1332201~Adult Diffuse Large B-Cell Lymphoma	2	1.06952	0.077384	CDK2, EZH2	156	5	9702	24.8769	1	0.893496	0.882262
DISGENET	C0752305~Anoxic-Ischemic Encephalopathy	2	1.06952	0.077384	HIF1A, VEGFA	156	5	9702	24.8769	1	0.893496	0.882262
DISGENET	C0752307~Anoxia-Ischemia, Cerebral	2	1.06952	0.077384	HIF1A, VEGFA	156	5	9702	24.8769	1	0.893496	0.882262
DISGENET	C2063866~Depressive Disorder, Treatment-Resistant	2	1.06952	0.077384	SLC6A2, VEGFA	156	5	9702	24.8769	1	0.893496	0.882262
DISGENET	C0178540~Cerebral Hypoxia-Ischemia	2	1.06952	0.077384	HIF1A, VEGFA	156	5	9702	24.8769	1	0.893496	0.882262
DISGENET	C0023473~Myeloid Leukemia, Chronic	3	1.60428	0.0777704	PER2, GSTP1, BIRC5	156	29	9702	6.43369	1	0.893496	0.882262
DISGENET	C0270823~Petit mal status	4	2.13904	0.0915724	KCNMA1, PTK2B, PTGS2, VEGFA	156	67	9702	3.71297	1	0.950974	0.939017
DISGENET	C0751524~Simple Partial Status Epilepticus	4	2.13904	0.0915724	KCNMA1, PTK2B, PTGS2, VEGFA	156	67	9702	3.71297	1	0.950974	0.939017
DISGENET	C0311335~Grand Mal Status Epilepticus	4	2.13904	0.0915724	KCNMA1, PTK2B, PTGS2, VEGFA	156	67	9702	3.71297	1	0.950974	0.939017
DISGENET	C0751522~Status Epilepticus, Subclinical	4	2.13904	0.0915724	KCNMA1, PTK2B, PTGS2, VEGFA	156	67	9702	3.71297	1	0.950974	0.939017
DISGENET	C0751523~Non-Convulsive Status Epilepticus	4	2.13904	0.0915724	KCNMA1, PTK2B, PTGS2, VEGFA	156	67	9702	3.71297	1	0.950974	0.939017
DISGENET	C0393734~Complex Partial Status Epilepticus	4	2.13904	0.0915724	KCNMA1, PTK2B, PTGS2, VEGFA	156	67	9702	3.71297	1	0.950974	0.939017
DISGENET	C0001815~Primary Myelofibrosis	2	1.06952	0.0921314	CALR, EZH2	156	6	9702	20.7308	1	0.950974	0.939017
DISGENET	C0206624~Hepatoblastoma	2	1.06952	0.0921314	PCNA, IGF2	156	6	9702	20.7308	1	0.950974	0.939017
DISGENET	C0011849~Diabetes Mellitus	3	1.60428	0.0921507	CPT1A, NCF1, PTGS2	156	32	9702	5.83053	1	0.950974	0.939017
DISGENET	C1269683~Major Depressive Disorder	8	4.27807	0.0944459	LDHA, ZBTB16, DDIT4, PTGS2, SLC6A2, HIF1A, BMP7, VEGFA	156	243	9702	2.04748	1	0.950974	0.939017
DISGENET	C0038220~Status Epilepticus	4	2.13904	0.0947295	KCNMA1, PTK2B, PTGS2, VEGFA	156	68	9702	3.65837	1	0.950974	0.939017
DISGENET	C0027651~Neoplasms	4	2.13904	0.0947295	MYC, HMGA2, PTGS2, VEGFA	156	68	9702	3.65837	1	0.950974	0.939017
DISGENET	C0086692~Benign Neoplasm	4	2.13904	0.0947295	MYC, HMGA2, PTGS2, VEGFA	156	68	9702	3.65837	1	0.950974	0.939017
DISGENET	C0263454~Chloracne	3	1.60428	0.0971045	RPA1, CREM, TOB1	156	33	9702	5.65385	1	0.953426	0.941439
DISGENET	C1708349~Hereditary Diffuse Gastric Cancer	9	4.81283	0.0973102	MYC, GSTP1, BIRC5, IRS2, ALDOB, ENO1, PTGS2, BMP7, AURKB	156	293	9702	1.91034	1	0.953426	0.941439
DISGENET	C0032927~Precancerous Conditions	5	2.6738	0.09927	GSTP1, FTH1, IGF2, PTGS2, VEGFA	156	110	9702	2.82692	1	0.953426	0.941439
DISGENET	C0282313~Condition, Preneoplastic	5	2.6738	0.09927	GSTP1, FTH1, IGF2, PTGS2, VEGFA	156	110	9702	2.82692	1	0.953426	0.941439

## Sheet: HK GO
Category	Term	Count	%	p-value	Genes	List Total	Pop Hits	Pop Total	Fold Enrichment	Bonferroni	Benjamini	FDR
DISGENET	C0034362~Q Fever	4	3.44828	6.87587e-06	DHCR24, HMGCR, LDLR, LSS	88	5	9702	88.2	0.00612136	0.00153504	0.00151441
DISGENET	C1443892~Chronic Q Fever	4	3.44828	6.87587e-06	DHCR24, HMGCR, LDLR, LSS	88	5	9702	88.2	0.00612136	0.00153504	0.00151441
DISGENET	C0519066~Acute Q fever	4	3.44828	6.87587e-06	DHCR24, HMGCR, LDLR, LSS	88	5	9702	88.2	0.00612136	0.00153504	0.00151441
DISGENET	C2973787~Coxiella burnetii Infection	4	3.44828	6.87587e-06	DHCR24, HMGCR, LDLR, LSS	88	5	9702	88.2	0.00612136	0.00153504	0.00151441
DISGENET	C2239176~Liver carcinoma	17	14.6552	9.19373e-06	CBR1, JUN, CEBPB, CDKN1B, HSPA5, LIFR, ENO1, HMGCR, NR0B2, PKM, SCD, PGK1, DEPDC1, SCAP, PCK1, FDFT1, BCL2L1	88	507	9702	3.69675	0.00817643	0.001642	0.00161994
DISGENET	C0752307~Anoxia-Ischemia, Cerebral	3	2.58621	0.000781108	NOS2, HIF1A, VEGFA	88	5	9702	66.15	0.502322	0.0634118	0.0625597
DISGENET	C0752304~Hypoxic-Ischemic Encephalopathy	3	2.58621	0.000781108	NOS2, HIF1A, VEGFA	88	5	9702	66.15	0.502322	0.0634118	0.0625597
DISGENET	C0752305~Anoxic-Ischemic Encephalopathy	3	2.58621	0.000781108	NOS2, HIF1A, VEGFA	88	5	9702	66.15	0.502322	0.0634118	0.0625597
DISGENET	C0178540~Cerebral Hypoxia-Ischemia	3	2.58621	0.000781108	NOS2, HIF1A, VEGFA	88	5	9702	66.15	0.502322	0.0634118	0.0625597
DISGENET	C0752306~Anoxia-Ischemia, Brain	3	2.58621	0.000781108	NOS2, HIF1A, VEGFA	88	5	9702	66.15	0.502322	0.0634118	0.0625597
DISGENET	C0752308~Hypoxia-Ischemia, Brain	3	2.58621	0.000781108	NOS2, HIF1A, VEGFA	88	5	9702	66.15	0.502322	0.0634118	0.0625597
DISGENET	C0005586~Bipolar Disorder	13	11.2069	0.00106683	HSPA5, MTHFR, NR1D1, HIF1A, VEGFA, PER2, DNAJB1, LDHA, PC, NEDD4, BHLHE40, PDLIM5, PRODH	88	477	9702	3.00472	0.614491	0.0793901	0.0783233
DISGENET	C0007786~Brain Ischemia	5	4.31034	0.00200687	CEBPB, JUN, NOS2, MTHFR, HIF1A	88	60	9702	9.1875	0.833695	0.12801	0.126289
DISGENET	C0917798~Cerebral Ischemia	5	4.31034	0.00200687	CEBPB, JUN, NOS2, MTHFR, HIF1A	88	60	9702	9.1875	0.833695	0.12801	0.126289
DISGENET	C0024121~Lung Neoplasms	9	7.75862	0.00252577	JUN, CDKN1B, CYP24A1, JUND, NOS2, IRF1, MTHFR, BCL2L1, MCL1	88	265	9702	3.74434	0.895479	0.144293	0.142354
DISGENET	C0242379~Malignant neoplasm of lung	9	7.75862	0.00258532	JUN, CDKN1B, CYP24A1, JUND, NOS2, IRF1, MTHFR, BCL2L1, MCL1	88	266	9702	3.73026	0.900905	0.144293	0.142354
DISGENET	C0342257~Complications of Diabetes Mellitus	3	2.58621	0.00414822	HIF1A, NR0B2, VEGFA	88	11	9702	30.0682	0.975573	0.217904	0.214976
DISGENET	C1704417~Hyperlipoproteinemia Type IIb	3	2.58621	0.00581483	APOA4, HMGCR, LDLR	88	13	9702	25.4423	0.994526	0.28848	0.284604
DISGENET	C2711227~Steatohepatitis	5	4.31034	0.00794096	CEBPB, HHEX, NR1D1, LDLR, NR0B2	88	88	9702	6.2642	0.999191	0.343723	0.339104
DISGENET	C0015695~Fatty Liver	5	4.31034	0.00794096	CEBPB, HHEX, NR1D1, LDLR, NR0B2	88	88	9702	6.2642	0.999191	0.343723	0.339104
DISGENET	C0745103~Hyperlipoproteinemia Type IIa	3	2.58621	0.00879126	APOA4, HMGCR, LDLR	88	16	9702	20.6719	0.999624	0.343723	0.339104
DISGENET	C0027051~Myocardial Infarction	5	4.31034	0.0103419	LDHA, NOS2, HSPA5, CREM, BCL2L1	88	95	9702	5.80263	0.999907	0.343723	0.339104
DISGENET	C0020445~Hypercholesterolemia, Familial	3	2.58621	0.0110795	APOA4, HMGCR, LDLR	88	18	9702	18.375	0.999952	0.343723	0.339104
DISGENET	C0009375~Colonic Neoplasms	6	5.17241	0.0116694	CBR1, KDM5B, JUN, NOS2, MTHFR, VEGFA	88	152	9702	4.35197	0.999972	0.343723	0.339104
DISGENET	C0750901~Alzheimer Disease, Early Onset	5	4.31034	0.0119042	GAPDHS, MTHFR, DHCR24, ENO1, VEGFA	88	99	9702	5.56818	0.999977	0.343723	0.339104
DISGENET	C0546126~Acute Confusional Senile Dementia	5	4.31034	0.0119042	GAPDHS, MTHFR, DHCR24, ENO1, VEGFA	88	99	9702	5.56818	0.999977	0.343723	0.339104
DISGENET	C0011265~Presenile dementia	5	4.31034	0.0119042	GAPDHS, MTHFR, DHCR24, ENO1, VEGFA	88	99	9702	5.56818	0.999977	0.343723	0.339104
DISGENET	C0494463~Alzheimer Disease, Late Onset	5	4.31034	0.0119042	GAPDHS, MTHFR, DHCR24, ENO1, VEGFA	88	99	9702	5.56818	0.999977	0.343723	0.339104
DISGENET	C0750900~Alzheimer's Disease, Focal Onset	5	4.31034	0.0119042	GAPDHS, MTHFR, DHCR24, ENO1, VEGFA	88	99	9702	5.56818	0.999977	0.343723	0.339104
DISGENET	C0023794~Lipoidosis	3	2.58621	0.0123114	SCD, LSS, NR0B2	88	19	9702	17.4079	0.999984	0.343723	0.339104
DISGENET	C0276496~Familial Alzheimer Disease (FAD)	5	4.31034	0.0123171	GAPDHS, MTHFR, DHCR24, ENO1, VEGFA	88	100	9702	5.5125	0.999984	0.343723	0.339104
DISGENET	C0002395~Alzheimer's Disease	5	4.31034	0.0127391	GAPDHS, MTHFR, DHCR24, ENO1, VEGFA	88	101	9702	5.45792	0.999989	0.343723	0.339104
DISGENET	C0007102~Malignant tumor of colon	6	5.17241	0.0139658	CBR1, KDM5B, JUN, NOS2, MTHFR, VEGFA	88	159	9702	4.16038	0.999996	0.343723	0.339104
DISGENET	C1261473~Sarcoma	3	2.58621	0.0149452	JUN, MDM2, MCL1	88	21	9702	15.75	0.999999	0.343723	0.339104
DISGENET	C0205698~Undifferentiated carcinoma	6	5.17241	0.0154062	PKM, SCD, SLC25A10, ENO1, HIF1A, BCL2L1	88	163	9702	4.05828	0.999999	0.343723	0.339104
DISGENET	C0205699~Carcinomatosis	6	5.17241	0.0154062	PKM, SCD, SLC25A10, ENO1, HIF1A, BCL2L1	88	163	9702	4.05828	0.999999	0.343723	0.339104
DISGENET	C0205696~Anaplastic carcinoma	6	5.17241	0.0154062	PKM, SCD, SLC25A10, ENO1, HIF1A, BCL2L1	88	163	9702	4.05828	0.999999	0.343723	0.339104
DISGENET	C0205697~Carcinoma, Spindle-Cell	6	5.17241	0.0154062	PKM, SCD, SLC25A10, ENO1, HIF1A, BCL2L1	88	163	9702	4.05828	0.999999	0.343723	0.339104
DISGENET	C0004153~Atherosclerosis	4	3.44828	0.0157801	NOS2, APOA4, LDLR, VEGFA	88	59	9702	7.47458	0.999999	0.343723	0.339104
DISGENET	C1563937~Atherogenesis	4	3.44828	0.0157801	NOS2, APOA4, LDLR, VEGFA	88	59	9702	7.47458	0.999999	0.343723	0.339104
DISGENET	C0007097~Carcinoma	6	5.17241	0.0157812	PKM, SCD, SLC25A10, ENO1, HIF1A, BCL2L1	88	164	9702	4.03354	0.999999	0.343723	0.339104
DISGENET	C1257931~Mammary Neoplasms, Human	11	9.48276	0.0186727	GPI, JUN, HHEX, CDKN1B, CYP24A1, NOS2, MDM2, MTHFR, ENO1, ALDOA, HIF1A	88	525	9702	2.31	1	0.379493	0.374394
DISGENET	C4704874~Mammary Carcinoma, Human	11	9.48276	0.0186727	GPI, JUN, HHEX, CDKN1B, CYP24A1, NOS2, MDM2, MTHFR, ENO1, ALDOA, HIF1A	88	525	9702	2.31	1	0.379493	0.374394
DISGENET	C1458155~Mammary Neoplasms	11	9.48276	0.0191226	GPI, JUN, HHEX, CDKN1B, CYP24A1, NOS2, MDM2, MTHFR, ENO1, ALDOA, HIF1A	88	527	9702	2.30123	1	0.379493	0.374394
DISGENET	C0151744~Myocardial Ischemia	6	5.17241	0.0207665	IRF1, NEDD4, BHLHE40, ALDOA, PDLIM5, VEGFA	88	176	9702	3.75852	1	0.379493	0.374394
DISGENET	C0678222~Breast Carcinoma	11	9.48276	0.0217415	GPI, JUN, HHEX, CDKN1B, CYP24A1, NOS2, MDM2, MTHFR, ENO1, ALDOA, HIF1A	88	538	9702	2.25418	1	0.379493	0.374394
DISGENET	C0751523~Non-Convulsive Status Epilepticus	4	3.44828	0.0220982	JUN, JUND, NOS2, VEGFA	88	67	9702	6.58209	1	0.379493	0.374394
DISGENET	C0751524~Simple Partial Status Epilepticus	4	3.44828	0.0220982	JUN, JUND, NOS2, VEGFA	88	67	9702	6.58209	1	0.379493	0.374394
DISGENET	C0270823~Petit mal status	4	3.44828	0.0220982	JUN, JUND, NOS2, VEGFA	88	67	9702	6.58209	1	0.379493	0.374394
DISGENET	C0751522~Status Epilepticus, Subclinical	4	3.44828	0.0220982	JUN, JUND, NOS2, VEGFA	88	67	9702	6.58209	1	0.379493	0.374394
DISGENET	C0393734~Complex Partial Status Epilepticus	4	3.44828	0.0220982	JUN, JUND, NOS2, VEGFA	88	67	9702	6.58209	1	0.379493	0.374394
DISGENET	C0311335~Grand Mal Status Epilepticus	4	3.44828	0.0220982	JUN, JUND, NOS2, VEGFA	88	67	9702	6.58209	1	0.379493	0.374394
DISGENET	C0038220~Status Epilepticus	4	3.44828	0.0229716	JUN, JUND, NOS2, VEGFA	88	68	9702	6.48529	1	0.385749	0.380565
DISGENET	C0017919~Glycogen Storage Disease	3	2.58621	0.0241292	LDHA, PGK1, ALDOA	88	27	9702	12.25	1	0.385749	0.380565
DISGENET	C2937358~Cerebral Hemorrhage	3	2.58621	0.025836	HMOX2, BCL2L1, VEGFA	88	28	9702	11.8125	1	0.385749	0.380565
DISGENET	C0086565~Liver Dysfunction	4	3.44828	0.0266513	NOS2, SC5D, MTHFR, BCL2L1	88	72	9702	6.125	1	0.385749	0.380565
DISGENET	C0023895~Liver diseases	4	3.44828	0.0266513	NOS2, SC5D, MTHFR, BCL2L1	88	72	9702	6.125	1	0.385749	0.380565
DISGENET	C0006826~Malignant Neoplasms	5	4.31034	0.0277815	ATF2, CDKN1B, CITED2, MDM2, VEGFA	88	128	9702	4.30664	1	0.385749	0.380565
DISGENET	C0006142~Malignant neoplasm of breast	17	14.6552	0.0279379	GPI, ATF2, JUN, PFKFB4, CDKN1B, NOS2, MTHFR, ENO1, PLOD1, HIF1A, PER2, HHEX, CYP24A1, NEDD4, MDM2, ALDOA, PRODH	88	1074	9702	1.74511	1	0.385749	0.380565
DISGENET	C4277682~Chemical and Drug Induced Liver Injury	9	7.75862	0.028078	PC, JUND, HSPA5, BDH1, MTHFR, ENO1, PDLIM5, NR0B2, VEGFA	88	404	9702	2.45606	1	0.385749	0.380565
DISGENET	C0019193~Hepatitis, Toxic	9	7.75862	0.028078	PC, JUND, HSPA5, BDH1, MTHFR, ENO1, PDLIM5, NR0B2, VEGFA	88	404	9702	2.45606	1	0.385749	0.380565
DISGENET	C0860207~Drug-Induced Liver Disease	9	7.75862	0.028078	PC, JUND, HSPA5, BDH1, MTHFR, ENO1, PDLIM5, NR0B2, VEGFA	88	404	9702	2.45606	1	0.385749	0.380565
DISGENET	C4279912~Chemically-Induced Liver Toxicity	9	7.75862	0.028078	PC, JUND, HSPA5, BDH1, MTHFR, ENO1, PDLIM5, NR0B2, VEGFA	88	404	9702	2.45606	1	0.385749	0.380565
DISGENET	C3658290~Drug-Induced Acute Liver Injury	9	7.75862	0.028078	PC, JUND, HSPA5, BDH1, MTHFR, ENO1, PDLIM5, NR0B2, VEGFA	88	404	9702	2.45606	1	0.385749	0.380565
DISGENET	C1262760~Hepatitis, Drug-Induced	9	7.75862	0.028078	PC, JUND, HSPA5, BDH1, MTHFR, ENO1, PDLIM5, NR0B2, VEGFA	88	404	9702	2.45606	1	0.385749	0.380565
DISGENET	C0494410~Nonorganic Sleep Wake Cycle Disorders	2	1.72414	0.0440481	NFIL3, BHLHE40	88	5	9702	44.1	1	0.554013	0.546569
DISGENET	C0751760~Shift-Work Sleep Disorder	2	1.72414	0.0440481	NFIL3, BHLHE40	88	5	9702	44.1	1	0.554013	0.546569
DISGENET	C0877792~Sleep Disorders, Circadian Rhythm	2	1.72414	0.0440481	NFIL3, BHLHE40	88	5	9702	44.1	1	0.554013	0.546569
DISGENET	C0751758~Advanced Sleep Phase Syndrome	2	1.72414	0.0440481	NFIL3, BHLHE40	88	5	9702	44.1	1	0.554013	0.546569
DISGENET	C0393770~Delayed Sleep Phase Syndrome	2	1.72414	0.0440481	NFIL3, BHLHE40	88	5	9702	44.1	1	0.554013	0.546569
DISGENET	C0751759~Non-24 Hour Sleep-Wake Disorder	2	1.72414	0.0440481	NFIL3, BHLHE40	88	5	9702	44.1	1	0.554013	0.546569
DISGENET	C0008313~Cholangitis, Sclerosing	2	1.72414	0.0526248	NOS2, HIF1A	88	6	9702	36.75	1	0.652693	0.643922
DISGENET	C0018798~Congenital Heart Defects	3	2.58621	0.0589979	MTHFR, HIF1A, VEGFA	88	44	9702	7.51705	1	0.721714	0.712016
DISGENET	C0221074~Depression, Postpartum	2	1.72414	0.0611253	PER2, MTHFR	88	7	9702	31.5	1	0.729067	0.71927
DISGENET	C0029463~Osteosarcoma	3	2.58621	0.0662768	JUN, BCOR, VEGFA	88	47	9702	7.03723	1	0.729067	0.71927
DISGENET	C1269683~Major Depressive Disorder	6	5.17241	0.0669186	LDHA, DDIT4, MTHFR, PDLIM5, HIF1A, VEGFA	88	243	9702	2.72222	1	0.729067	0.71927
DISGENET	C0021364~Male infertility	3	2.58621	0.0687668	MDM2, MTHFR, ENO1	88	48	9702	6.89062	1	0.729067	0.71927
DISGENET	C4551993~Amyotrophic Lateral Sclerosis, Familial	3	2.58621	0.0687668	JUND, LDLR, BCL2L1	88	48	9702	6.89062	1	0.729067	0.71927
DISGENET	C0848676~Subfertility, Male	3	2.58621	0.0687668	MDM2, MTHFR, ENO1	88	48	9702	6.89062	1	0.729067	0.71927
DISGENET	C0917731~Male sterility	3	2.58621	0.0687668	MDM2, MTHFR, ENO1	88	48	9702	6.89062	1	0.729067	0.71927
DISGENET	C1862941~Amyotrophic Lateral Sclerosis, Sporadic	3	2.58621	0.0687668	JUND, LDLR, BCL2L1	88	48	9702	6.89062	1	0.729067	0.71927
DISGENET	C0566602~Primary sclerosing cholangitis	2	1.72414	0.0695505	NOS2, HIF1A	88	8	9702	27.5625	1	0.729067	0.71927
DISGENET	C0003873~Rheumatoid Arthritis	5	4.31034	0.0708332	DDIT4, REL, MTHFR, ENO1, VEGFA	88	174	9702	3.1681	1	0.729067	0.71927
DISGENET	C0011853~Diabetes Mellitus, Experimental	4	3.44828	0.0727265	NOS2, PCK1, BCL2L1, VEGFA	88	108	9702	4.08333	1	0.729067	0.71927
DISGENET	C0002152~Alloxan Diabetes	4	3.44828	0.0727265	NOS2, PCK1, BCL2L1, VEGFA	88	108	9702	4.08333	1	0.729067	0.71927
DISGENET	C0038433~Streptozotocin Diabetes	4	3.44828	0.0727265	NOS2, PCK1, BCL2L1, VEGFA	88	108	9702	4.08333	1	0.729067	0.71927
DISGENET	C1862939~AMYOTROPHIC LATERAL SCLEROSIS 1	3	2.58621	0.0738377	JUND, LDLR, BCL2L1	88	50	9702	6.615	1	0.729067	0.71927
DISGENET	C0235527~Heart Failure, Right-Sided	4	3.44828	0.0759275	NOS2, PCK1, HIF1A, VEGFA	88	110	9702	4.00909	1	0.729067	0.71927
DISGENET	C0018802~Congestive heart failure	4	3.44828	0.0759275	NOS2, PCK1, HIF1A, VEGFA	88	110	9702	4.00909	1	0.729067	0.71927
DISGENET	C0023212~Left-Sided Heart Failure	4	3.44828	0.0759275	NOS2, PCK1, HIF1A, VEGFA	88	110	9702	4.00909	1	0.729067	0.71927
DISGENET	C1959583~Myocardial Failure	4	3.44828	0.0759275	NOS2, PCK1, HIF1A, VEGFA	88	110	9702	4.00909	1	0.729067	0.71927
DISGENET	C1961112~Heart Decompensation	4	3.44828	0.0759275	NOS2, PCK1, HIF1A, VEGFA	88	110	9702	4.00909	1	0.729067	0.71927
DISGENET	C0018801~Heart failure	4	3.44828	0.0759275	NOS2, PCK1, HIF1A, VEGFA	88	110	9702	4.00909	1	0.729067	0.71927
DISGENET	C0011570~Mental Depression	6	5.17241	0.0776321	PER2, LDHA, NOS2, MTHFR, HIF1A, VEGFA	88	254	9702	2.60433	1	0.732269	0.722429
DISGENET	C0037116~Silicosis	2	1.72414	0.0779009	JUN, NOS2	88	9	9702	24.5	1	0.732269	0.722429
DISGENET	C0027626~Neoplasm Invasiveness	5	4.31034	0.0831019	PKM, ENO1, SEPTIN9, ALDOA, HIF1A	88	184	9702	2.99592	1	0.773021	0.762633
DISGENET	C0751956~Acute Cerebrovascular Accidents	3	2.58621	0.0843236	NOS2, IRF1, MTHFR	88	54	9702	6.125	1	0.776299	0.765867
DISGENET	C0242350~Erectile dysfunction	2	1.72414	0.0861773	BCL2L1, VEGFA	88	10	9702	22.05	1	0.785269	0.774716
DISGENET	C0030246~Pustulosis of Palms and Soles	3	2.58621	0.092467	NOS2, REL, VEGFA	88	57	9702	5.80263	1	0.825731	0.814635
DISGENET	C0033860~Psoriasis	3	2.58621	0.092467	NOS2, REL, VEGFA	88	57	9702	5.80263	1	0.825731	0.814635
DISGENET	C0520572~Enzymopathy	2	1.72414	0.0943802	ENO1, ALDOA	88	11	9702	20.0455	1	0.834471	0.823257

## Sheet: Liver GO
Category	Term	Count	%	p-value	Genes	List Total	Pop Hits	Pop Total	Fold Enrichment	Bonferroni	Benjamini	FDR
DISGENET	C0002152~Alloxan Diabetes	10	7.29927	2.93323e-06	SREBF1, NOS2, GPD2, INSR, IRS2, PPARG, PCK1, ATF3, BCL2L1, VEGFA	109	108	9702	8.24159	0.00292309	0.000959696	0.000902961
DISGENET	C0038433~Streptozotocin Diabetes	10	7.29927	2.93323e-06	SREBF1, NOS2, GPD2, INSR, IRS2, PPARG, PCK1, ATF3, BCL2L1, VEGFA	109	108	9702	8.24159	0.00292309	0.000959696	0.000902961
DISGENET	C0011853~Diabetes Mellitus, Experimental	10	7.29927	2.93323e-06	SREBF1, NOS2, GPD2, INSR, IRS2, PPARG, PCK1, ATF3, BCL2L1, VEGFA	109	108	9702	8.24159	0.00292309	0.000959696	0.000902961
DISGENET	C0151744~Myocardial Ischemia	12	8.75912	3.84648e-06	NFKBIA, DUSP1, HGF, IRF1, NEDD4, BHLHE40, F2RL1, HIVEP2, ALDOA, PDLIM5, CXCL2, VEGFA	109	176	9702	6.06881	0.00383143	0.000959696	0.000902961
DISGENET	C2239176~Liver carcinoma	18	13.1387	4.06884e-05	SREBF1, CD274, JUN, CEBPB, CDKN1B, HSPA5, HGF, GMNN, LIFR, IRS2, ENO1, EGFR, NFKBIA, PKM, DEPDC1, PPARG, PCK1, BCL2L1	109	507	9702	3.16009	0.0397944	0.0081214	0.00764128
DISGENET	C4704874~Mammary Carcinoma, Human	18	13.1387	6.299e-05	GPI, JUN, HSP90AA1, CDKN1B, NOS2, AHR, ENO1, CXCL2, HIF1A, EGFR, NFKBIA, HHEX, DDIT3, NRIP1, MDM2, ANGPTL4, ALDOA, PPARGC1B	109	525	9702	3.05174	0.0609307	0.0082382	0.00775118
DISGENET	C1257931~Mammary Neoplasms, Human	18	13.1387	6.299e-05	GPI, JUN, HSP90AA1, CDKN1B, NOS2, AHR, ENO1, CXCL2, HIF1A, EGFR, NFKBIA, HHEX, DDIT3, NRIP1, MDM2, ANGPTL4, ALDOA, PPARGC1B	109	525	9702	3.05174	0.0609307	0.0082382	0.00775118
DISGENET	C1458155~Mammary Neoplasms	18	13.1387	6.60377e-05	GPI, JUN, HSP90AA1, CDKN1B, NOS2, AHR, ENO1, CXCL2, HIF1A, EGFR, NFKBIA, HHEX, DDIT3, NRIP1, MDM2, ANGPTL4, ALDOA, PPARGC1B	109	527	9702	3.04016	0.0637828	0.0082382	0.00775118
DISGENET	C0678222~Breast Carcinoma	18	13.1387	8.52519e-05	GPI, JUN, HSP90AA1, CDKN1B, NOS2, AHR, ENO1, CXCL2, HIF1A, EGFR, NFKBIA, HHEX, DDIT3, NRIP1, MDM2, ANGPTL4, ALDOA, PPARGC1B	109	538	9702	2.978	0.0815658	0.00858367	0.00807622
DISGENET	C0006826~Malignant Neoplasms	9	6.56934	8.60087e-05	CD274, ATF2, CDKN1B, CITED2, SRF, MDM2, AHR, EGFR, VEGFA	109	128	9702	6.25846	0.0822593	0.00858367	0.00807622
DISGENET	C0028754~Obesity	10	7.29927	0.00045232	SREBF1, HSPA5, DDIT3, NAMPT, PPARG, AHR, ANGPTL4, PCK1, AFF4, PPARGC1B	109	205	9702	4.34191	0.363339	0.0401445	0.0377712
DISGENET	C0021655~Insulin Resistance	6	4.37956	0.000522925	SREBF1, INSR, IRS2, PPARG, AHR, EGFR	109	60	9702	8.90092	0.406676	0.0401445	0.0377712
DISGENET	C0920563~Insulin Sensitivity	6	4.37956	0.000522925	SREBF1, INSR, IRS2, PPARG, AHR, EGFR	109	60	9702	8.90092	0.406676	0.0401445	0.0377712
DISGENET	C0006142~Malignant neoplasm of breast	25	18.2482	0.000604726	GPI, ATF2, PFKFB4, CDKN1B, AHR, ENO1, PLOD1, HIF1A, CXCL2, EGFR, HHEX, NRIP1, STX5, PPARGC1B, JUN, HSP90AA1, NOS2, PER2, NFKBIA, PER1, DDIT3, NEDD4, MDM2, ANGPTL4, ALDOA	109	1074	9702	2.07191	0.453215	0.0421662	0.0396734
DISGENET	C0027051~Myocardial Infarction	7	5.10949	0.000644715	LDHA, NOS2, HSPA5, DDIT3, NRIP1, CREM, BCL2L1	109	95	9702	6.55857	0.47462	0.0421662	0.0396734
DISGENET	C0206726~gliosarcoma	4	2.91971	0.000676011	NFKBIA, PPARG, EGFR, VEGFA	109	16	9702	22.2523	0.490786	0.0421662	0.0396734
DISGENET	C0030297~Pancreatic Neoplasm	7	5.10949	0.000845539	NFKBIA, LDHA, PPARG, AHR, HIF1A, EGFR, BCL2L1	109	100	9702	6.23064	0.570101	0.0447225	0.0420786
DISGENET	C0346647~Malignant neoplasm of pancreas	7	5.10949	0.00093817	NFKBIA, LDHA, PPARG, AHR, HIF1A, EGFR, BCL2L1	109	102	9702	6.10847	0.608094	0.0447225	0.0420786
DISGENET	C0027626~Neoplasm Invasiveness	9	6.56934	0.00100606	PKM, HGF, AHR, ENO1, ANGPTL4, SEPTIN9, ALDOA, HIF1A, EGFR	109	184	9702	4.35371	0.63379	0.0447225	0.0420786
DISGENET	C0752304~Hypoxic-Ischemic Encephalopathy	3	2.18978	0.00120119	NOS2, HIF1A, VEGFA	109	5	9702	53.4055	0.698657	0.0447225	0.0420786
DISGENET	C0178540~Cerebral Hypoxia-Ischemia	3	2.18978	0.00120119	NOS2, HIF1A, VEGFA	109	5	9702	53.4055	0.698657	0.0447225	0.0420786
DISGENET	C0752307~Anoxia-Ischemia, Cerebral	3	2.18978	0.00120119	NOS2, HIF1A, VEGFA	109	5	9702	53.4055	0.698657	0.0447225	0.0420786
DISGENET	C0752306~Anoxia-Ischemia, Brain	3	2.18978	0.00120119	NOS2, HIF1A, VEGFA	109	5	9702	53.4055	0.698657	0.0447225	0.0420786
DISGENET	C0752305~Anoxic-Ischemic Encephalopathy	3	2.18978	0.00120119	NOS2, HIF1A, VEGFA	109	5	9702	53.4055	0.698657	0.0447225	0.0420786
DISGENET	C0752308~Hypoxia-Ischemia, Brain	3	2.18978	0.00120119	NOS2, HIF1A, VEGFA	109	5	9702	53.4055	0.698657	0.0447225	0.0420786
DISGENET	C1961112~Heart Decompensation	7	5.10949	0.00138917	NOS2, NRIP1, PPARG, PCK1, HIF1A, CXCL2, VEGFA	109	110	9702	5.66422	0.750266	0.0447225	0.0420786
DISGENET	C1959583~Myocardial Failure	7	5.10949	0.00138917	NOS2, NRIP1, PPARG, PCK1, HIF1A, CXCL2, VEGFA	109	110	9702	5.66422	0.750266	0.0447225	0.0420786
DISGENET	C0018802~Congestive heart failure	7	5.10949	0.00138917	NOS2, NRIP1, PPARG, PCK1, HIF1A, CXCL2, VEGFA	109	110	9702	5.66422	0.750266	0.0447225	0.0420786
DISGENET	C0018801~Heart failure	7	5.10949	0.00138917	NOS2, NRIP1, PPARG, PCK1, HIF1A, CXCL2, VEGFA	109	110	9702	5.66422	0.750266	0.0447225	0.0420786
DISGENET	C0023212~Left-Sided Heart Failure	7	5.10949	0.00138917	NOS2, NRIP1, PPARG, PCK1, HIF1A, CXCL2, VEGFA	109	110	9702	5.66422	0.750266	0.0447225	0.0420786
DISGENET	C0235527~Heart Failure, Right-Sided	7	5.10949	0.00138917	NOS2, NRIP1, PPARG, PCK1, HIF1A, CXCL2, VEGFA	109	110	9702	5.66422	0.750266	0.0447225	0.0420786
DISGENET	C1269683~Major Depressive Disorder	10	7.29927	0.0015157	HDAC5, LDHA, HSP90AA1, TEF, HSPA1L, DDIT4, PDLIM5, HIF1A, EGFR, VEGFA	109	243	9702	3.66293	0.779931	0.0472708	0.0444763
DISGENET	C0334588~Giant Cell Glioblastoma	6	4.37956	0.00239427	NFKBIA, BHLHE40, PPARG, HIF1A, EGFR, VEGFA	109	84	9702	6.3578	0.908585	0.0724085	0.0681278
DISGENET	C0024121~Lung Neoplasms	10	7.29927	0.00273593	CD274, JUN, CDKN1B, JUND, NOS2, IRF1, BHLHE41, EGFR, BCL2L1, MCL1	109	265	9702	3.35884	0.935054	0.0791309	0.0744529
DISGENET	C0242379~Malignant neoplasm of lung	10	7.29927	0.00280588	CD274, JUN, CDKN1B, JUND, NOS2, IRF1, BHLHE41, EGFR, BCL2L1, MCL1	109	266	9702	3.34621	0.939445	0.0791309	0.0744529
DISGENET	C0015695~Fatty Liver	6	4.37956	0.00293371	SREBF1, CEBPB, HHEX, DDIT3, NR1D1, ANGPTL4	109	88	9702	6.06881	0.946718	0.0791309	0.0744529
DISGENET	C2711227~Steatohepatitis	6	4.37956	0.00293371	SREBF1, CEBPB, HHEX, DDIT3, NR1D1, ANGPTL4	109	88	9702	6.06881	0.946718	0.0791309	0.0744529
DISGENET	C0011860~Diabetes Mellitus, Non-Insulin-Dependent	9	6.56934	0.0031907	HHEX, NOS2, GPD2, INSR, IRS2, PPARG, ATF3, EGFR, BCL2L1	109	221	9702	3.62481	0.958804	0.0837978	0.0788439
DISGENET	C0033860~Psoriasis	5	3.64964	0.00364677	NFKBIA, NOS2, REL, PPARG, VEGFA	109	57	9702	7.80782	0.973908	0.0909869	0.0856079
DISGENET	C0030246~Pustulosis of Palms and Soles	5	3.64964	0.00364677	NFKBIA, NOS2, REL, PPARG, VEGFA	109	57	9702	7.80782	0.973908	0.0909869	0.0856079
DISGENET	C1563937~Atherogenesis	5	3.64964	0.00413111	NOS2, APOA4, PPARG, AHR, VEGFA	109	59	9702	7.54315	0.983939	0.0955952	0.0899438
DISGENET	C0004153~Atherosclerosis	5	3.64964	0.00413111	NOS2, APOA4, PPARG, AHR, VEGFA	109	59	9702	7.54315	0.983939	0.0955952	0.0899438
DISGENET	C0037116~Silicosis	3	2.18978	0.0042001	JUN, NOS2, AHR	109	9	9702	29.6697	0.985012	0.0955952	0.0899438
DISGENET	C0007786~Brain Ischemia	5	3.64964	0.00438884	NFKBIA, CEBPB, JUN, NOS2, HIF1A	109	60	9702	7.41743	0.987596	0.0955952	0.0899438
DISGENET	C0917798~Cerebral Ischemia	5	3.64964	0.00438884	NFKBIA, CEBPB, JUN, NOS2, HIF1A	109	60	9702	7.41743	0.987596	0.0955952	0.0899438
DISGENET	C0546126~Acute Confusional Senile Dementia	6	4.37956	0.00486514	INSR, GAPDHS, DHCR24, PPARG, ENO1, VEGFA	109	99	9702	5.3945	0.992306	0.0955952	0.0899438
DISGENET	C0750901~Alzheimer Disease, Early Onset	6	4.37956	0.00486514	INSR, GAPDHS, DHCR24, PPARG, ENO1, VEGFA	109	99	9702	5.3945	0.992306	0.0955952	0.0899438
DISGENET	C0011265~Presenile dementia	6	4.37956	0.00486514	INSR, GAPDHS, DHCR24, PPARG, ENO1, VEGFA	109	99	9702	5.3945	0.992306	0.0955952	0.0899438
DISGENET	C0750900~Alzheimer's Disease, Focal Onset	6	4.37956	0.00486514	INSR, GAPDHS, DHCR24, PPARG, ENO1, VEGFA	109	99	9702	5.3945	0.992306	0.0955952	0.0899438
DISGENET	C0494463~Alzheimer Disease, Late Onset	6	4.37956	0.00486514	INSR, GAPDHS, DHCR24, PPARG, ENO1, VEGFA	109	99	9702	5.3945	0.992306	0.0955952	0.0899438
DISGENET	C0023903~Liver neoplasms	7	5.10949	0.00498761	JUN, EGLN3, CDKN1B, HGF, PPARG, AHR, ATF3	109	142	9702	4.38778	0.993195	0.0955952	0.0899438
DISGENET	C0345904~Malignant neoplasm of liver	7	5.10949	0.00498761	JUN, EGLN3, CDKN1B, HGF, PPARG, AHR, ATF3	109	142	9702	4.38778	0.993195	0.0955952	0.0899438
DISGENET	C0276496~Familial Alzheimer Disease (FAD)	6	4.37956	0.0050767	INSR, GAPDHS, DHCR24, PPARG, ENO1, VEGFA	109	100	9702	5.34055	0.993777	0.0955952	0.0899438
DISGENET	C0002395~Alzheimer's Disease	6	4.37956	0.00529471	INSR, GAPDHS, DHCR24, PPARG, ENO1, VEGFA	109	101	9702	5.28767	0.994999	0.0961005	0.0904192
DISGENET	C1708349~Hereditary Diffuse Gastric Cancer	10	7.29927	0.00529612	KLF6, JUN, CDKN1B, IRF1, IRS2, PPARG, AHR, ENO1, EGFR, BCL2L1	109	293	9702	3.03786	0.995006	0.0961005	0.0904192
DISGENET	C0038356~Stomach Neoplasms	10	7.29927	0.00577799	KLF6, JUN, CDKN1B, IRF1, IRS2, PPARG, AHR, ENO1, EGFR, BCL2L1	109	297	9702	2.99694	0.996921	0.102033	0.096001
DISGENET	C0024623~Malignant neoplasm of stomach	10	7.29927	0.00616119	KLF6, JUN, CDKN1B, IRF1, IRS2, PPARG, AHR, ENO1, EGFR, BCL2L1	109	300	9702	2.96697	0.997904	0.102033	0.096001
DISGENET	C0751524~Simple Partial Status Epilepticus	5	3.64964	0.00650169	MEF2C, JUN, JUND, NOS2, VEGFA	109	67	9702	6.64248	0.998511	0.102033	0.096001
DISGENET	C0270823~Petit mal status	5	3.64964	0.00650169	MEF2C, JUN, JUND, NOS2, VEGFA	109	67	9702	6.64248	0.998511	0.102033	0.096001
DISGENET	C0751522~Status Epilepticus, Subclinical	5	3.64964	0.00650169	MEF2C, JUN, JUND, NOS2, VEGFA	109	67	9702	6.64248	0.998511	0.102033	0.096001
DISGENET	C0393734~Complex Partial Status Epilepticus	5	3.64964	0.00650169	MEF2C, JUN, JUND, NOS2, VEGFA	109	67	9702	6.64248	0.998511	0.102033	0.096001
DISGENET	C0311335~Grand Mal Status Epilepticus	5	3.64964	0.00650169	MEF2C, JUN, JUND, NOS2, VEGFA	109	67	9702	6.64248	0.998511	0.102033	0.096001
DISGENET	C0751523~Non-Convulsive Status Epilepticus	5	3.64964	0.00650169	MEF2C, JUN, JUND, NOS2, VEGFA	109	67	9702	6.64248	0.998511	0.102033	0.096001
DISGENET	C0005586~Bipolar Disorder	13	9.48905	0.0066233	HDAC5, HSPA5, HSPA4, BHLHE41, NR1D1, HIF1A, VEGFA, PER2, DNAJB1, LDHA, NEDD4, BHLHE40, PDLIM5	109	477	9702	2.42583	0.998683	0.102033	0.096001
DISGENET	C0086692~Benign Neoplasm	5	3.64964	0.00684991	ATF2, CITED2, SRF, AHR, VEGFA	109	68	9702	6.54479	0.998951	0.102033	0.096001
DISGENET	C0038220~Status Epilepticus	5	3.64964	0.00684991	MEF2C, JUN, JUND, NOS2, VEGFA	109	68	9702	6.54479	0.998951	0.102033	0.096001
DISGENET	C0027651~Neoplasms	5	3.64964	0.00684991	ATF2, CITED2, SRF, AHR, VEGFA	109	68	9702	6.54479	0.998951	0.102033	0.096001
DISGENET	C0011616~Contact Dermatitis	5	3.64964	0.00796807	HSP90AA1, DUSP1, DDIT3, AHR, VEGFA	109	71	9702	6.26825	0.999659	0.113568	0.106854
DISGENET	C0162351~Contact hypersensitivity	5	3.64964	0.00796807	HSP90AA1, DUSP1, DDIT3, AHR, VEGFA	109	71	9702	6.26825	0.999659	0.113568	0.106854
DISGENET	C0041696~Unipolar Depression	9	6.56934	0.00818851	HDAC5, LDHA, HSP90AA1, TEF, HSPA1L, DDIT4, PDLIM5, HIF1A, EGFR	109	259	9702	3.09298	0.999727	0.113568	0.106854
DISGENET	C0033578~Prostatic Neoplasms	15	10.9489	0.00819326	CDKN1B, ARID4A, LIFR, AHR, HIF1A, FOXO1, EGFR, VEGFA, KLF6, XPO1, MDM2, ERF, NCOA7, ATF3, JAK1	109	616	9702	2.16743	0.999728	0.113568	0.106854
DISGENET	C0376358~Malignant neoplasm of prostate	15	10.9489	0.00819326	CDKN1B, ARID4A, LIFR, AHR, HIF1A, FOXO1, EGFR, VEGFA, KLF6, XPO1, MDM2, ERF, NCOA7, ATF3, JAK1	109	616	9702	2.16743	0.999728	0.113568	0.106854
DISGENET	C0205699~Carcinomatosis	7	5.10949	0.00960116	PKM, SLC25A10, ENO1, ANGPTL4, HIF1A, EGFR, BCL2L1	109	163	9702	3.82248	0.999934	0.126078	0.118625
DISGENET	C0205698~Undifferentiated carcinoma	7	5.10949	0.00960116	PKM, SLC25A10, ENO1, ANGPTL4, HIF1A, EGFR, BCL2L1	109	163	9702	3.82248	0.999934	0.126078	0.118625
DISGENET	C0205697~Carcinoma, Spindle-Cell	7	5.10949	0.00960116	PKM, SLC25A10, ENO1, ANGPTL4, HIF1A, EGFR, BCL2L1	109	163	9702	3.82248	0.999934	0.126078	0.118625
DISGENET	C0205696~Anaplastic carcinoma	7	5.10949	0.00960116	PKM, SLC25A10, ENO1, ANGPTL4, HIF1A, EGFR, BCL2L1	109	163	9702	3.82248	0.999934	0.126078	0.118625
DISGENET	C0007097~Carcinoma	7	5.10949	0.00987779	PKM, SLC25A10, ENO1, ANGPTL4, HIF1A, EGFR, BCL2L1	109	164	9702	3.79917	0.99995	0.128026	0.120458
DISGENET	C2930617~Pulmonary Fibrosis - from Asbestos Exposure	3	2.18978	0.0102387	NOS2, HSPA5, DDIT3	109	14	9702	19.0734	0.999965	0.129344	0.121697
DISGENET	C0003949~Asbestosis	3	2.18978	0.0102387	NOS2, HSPA5, DDIT3	109	14	9702	19.0734	0.999965	0.129344	0.121697
DISGENET	C0023467~Leukemia, Myelocytic, Acute	7	5.10949	0.0126287	HGF, IRF1, BCOR, SEPTIN9, ATP1B1, FOXO1, JAK1	109	173	9702	3.60153	0.999997	0.155322	0.146139
DISGENET	C0018798~Congenital Heart Defects	4	2.91971	0.0127619	AHR, HIF1A, AFF4, VEGFA	109	44	9702	8.09174	0.999997	0.155322	0.146139
DISGENET	C0549473~Thyroid carcinoma	4	2.91971	0.0127619	CDKN1B, NCOA4, PPARG, HIF1A	109	44	9702	8.09174	0.999997	0.155322	0.146139
DISGENET	C0003873~Rheumatoid Arthritis	7	5.10949	0.0129645	DDIT4, REL, TNFRSF14, AHR, ENO1, CXCL2, VEGFA	109	174	9702	3.58083	0.999998	0.155886	0.14667
DISGENET	C1258085~Barrett Epithelium	3	2.18978	0.0133076	HGF, PPARG, MCL1	109	16	9702	16.6892	0.999998	0.156247	0.14701
DISGENET	C0004763~Barrett Esophagus	3	2.18978	0.0133076	HGF, PPARG, MCL1	109	16	9702	16.6892	0.999998	0.156247	0.14701
DISGENET	C0021368~Inflammation	6	4.37956	0.0135545	NOS2, F2RL1, PPARG, AHR, CXCL2, VEGFA	109	127	9702	4.20516	0.999999	0.157296	0.147997
DISGENET	C0029463~Osteosarcoma	4	2.91971	0.0152549	JUN, BCOR, EGFR, VEGFA	109	47	9702	7.57525	1	0.174993	0.164648
DISGENET	C0035126~Reperfusion Injury	5	3.64964	0.0172083	JUN, NOS2, HGF, PPARG, CXCL2	109	89	9702	5.00052	1	0.195158	0.183621
DISGENET	C0027080~Myoglobinuria	2	1.45985	0.0221407	LDHA, LPIN1	109	2	9702	89.0092	1	0.248274	0.233597
DISGENET	C1261473~Sarcoma	3	2.18978	0.0224635	JUN, MDM2, MCL1	109	21	9702	12.7156	1	0.249095	0.234369
DISGENET	C0011570~Mental Depression	8	5.83942	0.023089	PER2, HDAC5, LDHA, NOS2, DUSP1, HIF1A, ATF3, VEGFA	109	254	9702	2.80344	1	0.253218	0.238248
DISGENET	C0019829~Hodgkin Disease	3	2.18978	0.0245328	NFKBIA, CD274, REL	109	22	9702	12.1376	1	0.266127	0.250394
DISGENET	C0018675~Head Neoplasms	3	2.18978	0.0288938	EGFR, BCL2L1, VEGFA	109	24	9702	11.1261	1	0.297278	0.279704
DISGENET	C0598784~Dyslipoproteinemias	3	2.18978	0.0288938	PPARG, AHR, ANGPTL4	109	24	9702	11.1261	1	0.297278	0.279704
DISGENET	C0242339~Dyslipidemias	3	2.18978	0.0288938	PPARG, AHR, ANGPTL4	109	24	9702	11.1261	1	0.297278	0.279704
DISGENET	C0751177~Cancer of Head	3	2.18978	0.0288938	EGFR, BCL2L1, VEGFA	109	24	9702	11.1261	1	0.297278	0.279704
DISGENET	C0887900~Upper Aerodigestive Tract Neoplasms	3	2.18978	0.0288938	EGFR, BCL2L1, VEGFA	109	24	9702	11.1261	1	0.297278	0.279704
DISGENET	C0007131~Non-Small Cell Lung Carcinoma	6	4.37956	0.0299495	MDM2, ENO1, HIF1A, ATF3, EGFR, VEGFA	109	156	9702	3.42343	1	0.304996	0.286966
DISGENET	C0009319~Colitis	3	2.18978	0.0311818	NOS2, NAMPT, AHR	109	25	9702	10.6811	1	0.308113	0.289898
DISGENET	C0027533~Neck Neoplasms	3	2.18978	0.0311818	EGFR, BCL2L1, VEGFA	109	25	9702	10.6811	1	0.308113	0.289898
DISGENET	C0746787~Cancer of Neck	3	2.18978	0.0311818	EGFR, BCL2L1, VEGFA	109	25	9702	10.6811	1	0.308113	0.289898
DISGENET	C0029456~Osteoporosis	4	2.91971	0.0329005	HDAC5, PKM, GPD2, ENO1	109	63	9702	5.65138	1	0.313925	0.295366
DISGENET	C0813142~Circadian Rhythm Disorders	2	1.45985	0.0330282	PPARG, AHR	109	3	9702	59.3394	1	0.313925	0.295366
DISGENET	C0236811~Chronobiology Disorders	2	1.45985	0.0330282	PPARG, AHR	109	3	9702	59.3394	1	0.313925	0.295366
DISGENET	C0887800~Psychogenic Inversion of Circadian Rhythm	2	1.45985	0.0330282	PPARG, AHR	109	3	9702	59.3394	1	0.313925	0.295366
DISGENET	C0027627~Neoplasm Metastasis	7	5.10949	0.0339768	HSP90AA1, HGF, AHR, ANGPTL4, ALDOA, EGFR, VEGFA	109	217	9702	2.87126	1	0.319895	0.300983
DISGENET	C0027659~Neoplasms, Experimental	4	2.91971	0.0370238	HGF, AHR, HIF1A, VEGFA	109	66	9702	5.3945	1	0.345324	0.324909
DISGENET	C2937358~Cerebral Hemorrhage	3	2.18978	0.0384541	HMOX2, BCL2L1, VEGFA	109	28	9702	9.5367	1	0.355344	0.334337
DISGENET	C0525045~Mood Disorders	6	4.37956	0.0393159	LDHA, HSP90AA1, HSPA4, PPARG, HIF1A, VEGFA	109	168	9702	3.1789	1	0.359975	0.338694
DISGENET	C0023473~Myeloid Leukemia, Chronic	3	2.18978	0.0410083	PER2, PER1, HSPA5	109	29	9702	9.20785	1	0.372058	0.350062
DISGENET	C0263454~Chloracne	3	2.18978	0.0518312	CDKN1B, CREM, EGFR	109	33	9702	8.09174	1	0.457465	0.43042
DISGENET	C0018671~Head and Neck Neoplasms	3	2.18978	0.0518312	EGFR, BCL2L1, VEGFA	109	33	9702	8.09174	1	0.457465	0.43042
DISGENET	C0494410~Nonorganic Sleep Wake Cycle Disorders	2	1.45985	0.0544442	NFIL3, BHLHE40	109	5	9702	35.6037	1	0.457465	0.43042
DISGENET	C0877792~Sleep Disorders, Circadian Rhythm	2	1.45985	0.0544442	NFIL3, BHLHE40	109	5	9702	35.6037	1	0.457465	0.43042
DISGENET	C0751759~Non-24 Hour Sleep-Wake Disorder	2	1.45985	0.0544442	NFIL3, BHLHE40	109	5	9702	35.6037	1	0.457465	0.43042
DISGENET	C0751760~Shift-Work Sleep Disorder	2	1.45985	0.0544442	NFIL3, BHLHE40	109	5	9702	35.6037	1	0.457465	0.43042
DISGENET	C0751758~Advanced Sleep Phase Syndrome	2	1.45985	0.0544442	NFIL3, BHLHE40	109	5	9702	35.6037	1	0.457465	0.43042
DISGENET	C0393770~Delayed Sleep Phase Syndrome	2	1.45985	0.0544442	NFIL3, BHLHE40	109	5	9702	35.6037	1	0.457465	0.43042
DISGENET	C0014859~Esophageal Neoplasms	4	2.91971	0.0560053	NOS2, ENO1, CXCL2, EGFR	109	78	9702	4.56457	1	0.457465	0.43042
DISGENET	C0546837~Malignant neoplasm of esophagus	4	2.91971	0.0560053	NOS2, ENO1, CXCL2, EGFR	109	78	9702	4.56457	1	0.457465	0.43042
DISGENET	C0024115~Lung diseases	4	2.91971	0.0560053	INSR, HIF1A, AFF4, VEGFA	109	78	9702	4.56457	1	0.457465	0.43042
DISGENET	C0151468~Thyroid Gland Follicular Adenoma	3	2.18978	0.0575834	NCOA4, PPARG, HIF1A	109	35	9702	7.62936	1	0.457465	0.43042
DISGENET	C0017636~Glioblastoma	4	2.91971	0.0577614	BHLHE40, HIF1A, EGFR, VEGFA	109	79	9702	4.50679	1	0.457465	0.43042
DISGENET	C4552091~Polyarthritis, Juvenile, Rheumatoid Factor Negative	5	3.64964	0.0582145	PER1, JUN, DUSP1, DDIT3, CREM	109	131	9702	3.3973	1	0.457465	0.43042
DISGENET	C4704862~Polyarthritis, Juvenile, Rheumatoid Factor Positive	5	3.64964	0.0582145	PER1, JUN, DUSP1, DDIT3, CREM	109	131	9702	3.3973	1	0.457465	0.43042
DISGENET	C3495559~Juvenile arthritis	5	3.64964	0.0582145	PER1, JUN, DUSP1, DDIT3, CREM	109	131	9702	3.3973	1	0.457465	0.43042
DISGENET	C3714758~Juvenile psoriatic arthritis	5	3.64964	0.0582145	PER1, JUN, DUSP1, DDIT3, CREM	109	131	9702	3.3973	1	0.457465	0.43042
DISGENET	C0020538~Hypertensive disease	6	4.37956	0.0606945	JUN, NOS2, PPARG, AHR, HIF1A, CXCL2	109	190	9702	2.81082	1	0.473228	0.445251
DISGENET	C0040136~Thyroid Neoplasm	3	2.18978	0.063546	NCOA4, PPARG, HIF1A	109	37	9702	7.21696	1	0.488357	0.459486
DISGENET	C0087031~Juvenile-Onset Still Disease	5	3.64964	0.0636136	PER1, JUN, DUSP1, DDIT3, CREM	109	135	9702	3.29664	1	0.488357	0.459486
DISGENET	C0008313~Cholangitis, Sclerosing	2	1.45985	0.0649753	NOS2, HIF1A	109	6	9702	29.6697	1	0.491766	0.462693
DISGENET	C4721507~Alveolitis, Fibrosing	4	2.91971	0.0650432	CEBPB, HGF, SKIL, CXCL2	109	83	9702	4.2896	1	0.491766	0.462693
DISGENET	C0034069~Pulmonary Fibrosis	4	2.91971	0.0688355	CEBPB, HGF, SKIL, CXCL2	109	85	9702	4.18867	1	0.516525	0.485989
DISGENET	C0993582~Arthritis, Experimental	3	2.18978	0.0728587	AHR, EGFR, VEGFA	109	40	9702	6.67569	1	0.534654	0.503046
DISGENET	C0971858~Arthritis, Collagen-Induced	3	2.18978	0.0728587	AHR, EGFR, VEGFA	109	40	9702	6.67569	1	0.534654	0.503046
DISGENET	C0003865~Arthritis, Adjuvant-Induced	3	2.18978	0.0728587	AHR, EGFR, VEGFA	109	40	9702	6.67569	1	0.534654	0.503046
DISGENET	C0007113~Rectal Carcinoma	2	1.45985	0.0753901	CDKN1B, EGFR	109	7	9702	25.4312	1	0.545213	0.512981
DISGENET	C0034885~Rectal Neoplasms	2	1.45985	0.0753901	CDKN1B, EGFR	109	7	9702	25.4312	1	0.545213	0.512981
DISGENET	C0017667~Nodular glomerulosclerosis	3	2.18978	0.0760555	MFN2, PPARG, VEGFA	109	41	9702	6.51287	1	0.546067	0.513785
DISGENET	C0566602~Primary sclerosing cholangitis	2	1.45985	0.0856901	NOS2, HIF1A	109	8	9702	22.2523	1	0.583214	0.548735
DISGENET	C0021831~Intestinal Diseases	2	1.45985	0.0856901	NOS2, DDIT3	109	8	9702	22.2523	1	0.583214	0.548735
DISGENET	C0270192~Perinatal Subarachnoid Hemorrhage	2	1.45985	0.0856901	NOS2, PPARG	109	8	9702	22.2523	1	0.583214	0.548735
DISGENET	C0751530~Subarachnoid Hemorrhage, Aneurysmal	2	1.45985	0.0856901	NOS2, PPARG	109	8	9702	22.2523	1	0.583214	0.548735
DISGENET	C0795688~Subarachnoid Hemorrhage, Intracranial	2	1.45985	0.0856901	NOS2, PPARG	109	8	9702	22.2523	1	0.583214	0.548735
DISGENET	C0472383~Subarachnoid Hemorrhage, Spontaneous	2	1.45985	0.0856901	NOS2, PPARG	109	8	9702	22.2523	1	0.583214	0.548735
DISGENET	C0278996~Malignant Head and Neck Neoplasm	3	2.18978	0.0859042	EGFR, BCL2L1, VEGFA	109	44	9702	6.06881	1	0.583214	0.548735
DISGENET	C0011881~Diabetic Nephropathy	3	2.18978	0.0859042	MFN2, PPARG, VEGFA	109	44	9702	6.06881	1	0.583214	0.548735
DISGENET	C0009375~Colonic Neoplasms	5	3.64964	0.0893598	JUN, NOS2, PPARG, EGFR, VEGFA	109	152	9702	2.92793	1	0.602575	0.566952
DISGENET	C1319315~Adenocarcinoma of large intestine	4	2.91971	0.0914044	EEF2K, TBK1, MDM2, EGFR	109	96	9702	3.70872	1	0.612226	0.576032
DISGENET	C0038525~Subarachnoid Hemorrhage	2	1.45985	0.0958763	NOS2, PPARG	109	9	9702	19.7798	1	0.631058	0.593751
DISGENET	C0238301~Cancer of Nasopharynx	2	1.45985	0.0958763	NFKBIA, EGFR	109	9	9702	19.7798	1	0.631058	0.593751
DISGENET	C0007570~Celiac Disease	3	2.18978	0.096113	CXCL11, TNFRSF14, PCK1	109	47	9702	5.68144	1	0.631058	0.593751
DISGENET	C0021364~Male infertility	3	2.18978	0.0995899	MDM2, AHR, ENO1	109	48	9702	5.56307	1	0.641231	0.603322
DISGENET	C0848676~Subfertility, Male	3	2.18978	0.0995899	MDM2, AHR, ENO1	109	48	9702	5.56307	1	0.641231	0.603322
DISGENET	C0917731~Male sterility	3	2.18978	0.0995899	MDM2, AHR, ENO1	109	48	9702	5.56307	1	0.641231	0.603322

## Sheet: Intestin GO
Category	Term	Count	%	p-value	Genes	List Total	Pop Hits	Pop Total	Fold Enrichment	Bonferroni	Benjamini	FDR
DISGENET	C0002152~Alloxan Diabetes	7	9.33333	5.59031e-05	INSR, IRS2, PPARG, PCK1, FOXO3, ATF3, VEGFA	62	108	9702	10.1425	0.0430967	0.00730005	0.00712403
DISGENET	C0011853~Diabetes Mellitus, Experimental	7	9.33333	5.59031e-05	INSR, IRS2, PPARG, PCK1, FOXO3, ATF3, VEGFA	62	108	9702	10.1425	0.0430967	0.00730005	0.00712403
DISGENET	C0038433~Streptozotocin Diabetes	7	9.33333	5.59031e-05	INSR, IRS2, PPARG, PCK1, FOXO3, ATF3, VEGFA	62	108	9702	10.1425	0.0430967	0.00730005	0.00712403
DISGENET	C0205644~Carcinoma, Granular Cell	7	9.33333	8.33762e-05	CYP26A1, APOA1, PPARG, APOE, CYP7B1, ESR2, VEGFA	62	116	9702	9.44299	0.0635913	0.00730005	0.00712403
DISGENET	C0205645~Adenocarcinoma, Tubular	7	9.33333	8.33762e-05	CYP26A1, APOA1, PPARG, APOE, CYP7B1, ESR2, VEGFA	62	116	9702	9.44299	0.0635913	0.00730005	0.00712403
DISGENET	C0205643~Carcinoma, Cribriform	7	9.33333	8.33762e-05	CYP26A1, APOA1, PPARG, APOE, CYP7B1, ESR2, VEGFA	62	116	9702	9.44299	0.0635913	0.00730005	0.00712403
DISGENET	C0205642~Adenocarcinoma, Oxyphilic	7	9.33333	8.33762e-05	CYP26A1, APOA1, PPARG, APOE, CYP7B1, ESR2, VEGFA	62	116	9702	9.44299	0.0635913	0.00730005	0.00712403
DISGENET	C0205641~Adenocarcinoma, Basal Cell	7	9.33333	8.33762e-05	CYP26A1, APOA1, PPARG, APOE, CYP7B1, ESR2, VEGFA	62	116	9702	9.44299	0.0635913	0.00730005	0.00712403
DISGENET	C0001418~Adenocarcinoma	7	9.33333	8.33762e-05	CYP26A1, APOA1, PPARG, APOE, CYP7B1, ESR2, VEGFA	62	116	9702	9.44299	0.0635913	0.00730005	0.00712403
DISGENET	C0549473~Thyroid carcinoma	5	6.66667	0.000159088	RXRA, CDKN1B, NCOA4, PPARG, HIF1A	62	44	9702	17.7823	0.11783	0.0125361	0.0122338
DISGENET	C1961112~Heart Decompensation	6	8	0.000614032	NRIP1, PPARG, PCK1, HIF1A, XDH, VEGFA	62	110	9702	8.53548	0.38369	0.0302411	0.0295119
DISGENET	C0235527~Heart Failure, Right-Sided	6	8	0.000614032	NRIP1, PPARG, PCK1, HIF1A, XDH, VEGFA	62	110	9702	8.53548	0.38369	0.0302411	0.0295119
DISGENET	C0018801~Heart failure	6	8	0.000614032	NRIP1, PPARG, PCK1, HIF1A, XDH, VEGFA	62	110	9702	8.53548	0.38369	0.0302411	0.0295119
DISGENET	C1959583~Myocardial Failure	6	8	0.000614032	NRIP1, PPARG, PCK1, HIF1A, XDH, VEGFA	62	110	9702	8.53548	0.38369	0.0302411	0.0295119
DISGENET	C0023212~Left-Sided Heart Failure	6	8	0.000614032	NRIP1, PPARG, PCK1, HIF1A, XDH, VEGFA	62	110	9702	8.53548	0.38369	0.0302411	0.0295119
DISGENET	C0018802~Congestive heart failure	6	8	0.000614032	NRIP1, PPARG, PCK1, HIF1A, XDH, VEGFA	62	110	9702	8.53548	0.38369	0.0302411	0.0295119
DISGENET	C0151468~Thyroid Gland Follicular Adenoma	4	5.33333	0.00134134	RXRA, NCOA4, PPARG, HIF1A	62	35	9702	17.8839	0.652741	0.062175	0.0606759
DISGENET	C0040136~Thyroid Neoplasm	4	5.33333	0.00157824	RXRA, NCOA4, PPARG, HIF1A	62	37	9702	16.9172	0.711955	0.0673273	0.0657039
DISGENET	C0009241~Cognition Disorders	4	5.33333	0.0017059	APP, SMAD4, APOE, NR0B2	62	38	9702	16.472	0.739563	0.0673273	0.0657039
DISGENET	C0028754~Obesity	7	9.33333	0.00174613	DDIT3, PPARG, ANGPTL4, APOE, PCK1, FOXO3, NR0B2	62	205	9702	5.34335	0.747704	0.0673273	0.0657039
DISGENET	C0027746~Nerve Degeneration	5	6.66667	0.00179426	APP, DDIT4, PPARG, APOE, XDH	62	83	9702	9.42674	0.757109	0.0673273	0.0657039
DISGENET	C0342257~Complications of Diabetes Mellitus	3	4	0.00206211	HIF1A, NR0B2, VEGFA	62	11	9702	42.6774	0.803407	0.073861	0.0720801
DISGENET	C0750901~Alzheimer Disease, Early Onset	5	6.66667	0.00341131	APP, INSR, PPARG, APOE, VEGFA	62	99	9702	7.90323	0.932303	0.0995394	0.0971394
DISGENET	C0750900~Alzheimer's Disease, Focal Onset	5	6.66667	0.00341131	APP, INSR, PPARG, APOE, VEGFA	62	99	9702	7.90323	0.932303	0.0995394	0.0971394
DISGENET	C0494463~Alzheimer Disease, Late Onset	5	6.66667	0.00341131	APP, INSR, PPARG, APOE, VEGFA	62	99	9702	7.90323	0.932303	0.0995394	0.0971394
DISGENET	C0011265~Presenile dementia	5	6.66667	0.00341131	APP, INSR, PPARG, APOE, VEGFA	62	99	9702	7.90323	0.932303	0.0995394	0.0971394
DISGENET	C0546126~Acute Confusional Senile Dementia	5	6.66667	0.00341131	APP, INSR, PPARG, APOE, VEGFA	62	99	9702	7.90323	0.932303	0.0995394	0.0971394
DISGENET	C0276496~Familial Alzheimer Disease (FAD)	5	6.66667	0.00353693	APP, INSR, PPARG, APOE, VEGFA	62	100	9702	7.82419	0.938704	0.0995394	0.0971394
DISGENET	C0002395~Alzheimer's Disease	5	6.66667	0.00366568	APP, INSR, PPARG, APOE, VEGFA	62	101	9702	7.74673	0.944638	0.0996053	0.0972037
DISGENET	C0376358~Malignant neoplasm of prostate	11	14.6667	0.00470518	RXRA, CDKN1B, STEAP4, BNIP3, MDM2, CYP7B1, HIF1A, ATF3, ESR2, JMJD6, VEGFA	62	616	9702	2.79435	0.975679	0.119603	0.116719
DISGENET	C0033578~Prostatic Neoplasms	11	14.6667	0.00470518	RXRA, CDKN1B, STEAP4, BNIP3, MDM2, CYP7B1, HIF1A, ATF3, ESR2, JMJD6, VEGFA	62	616	9702	2.79435	0.975679	0.119603	0.116719
DISGENET	C0151744~Myocardial Ischemia	6	8	0.00486255	RGCC, RAB12, ALDOA, JUNB, PGM1, VEGFA	62	176	9702	5.33468	0.978529	0.11974	0.116853
DISGENET	C1257931~Mammary Neoplasms, Human	10	13.3333	0.00519841	EFNA1, CDKN1B, DDIT3, NRIP1, MDM2, ANGPTL4, ALDOA, HIF1A, ESR2, JMJD6	62	525	9702	2.98065	0.983543	0.11996	0.117067
DISGENET	C4704874~Mammary Carcinoma, Human	10	13.3333	0.00519841	EFNA1, CDKN1B, DDIT3, NRIP1, MDM2, ANGPTL4, ALDOA, HIF1A, ESR2, JMJD6	62	525	9702	2.98065	0.983543	0.11996	0.117067
DISGENET	C1458155~Mammary Neoplasms	10	13.3333	0.00532816	EFNA1, CDKN1B, DDIT3, NRIP1, MDM2, ANGPTL4, ALDOA, HIF1A, ESR2, JMJD6	62	527	9702	2.96933	0.985151	0.11996	0.117067
DISGENET	C0004153~Atherosclerosis	4	5.33333	0.00598747	ABCA1, PPARG, APOE, VEGFA	62	59	9702	10.6091	0.991194	0.12542	0.122396
DISGENET	C1563937~Atherogenesis	4	5.33333	0.00598747	ABCA1, PPARG, APOE, VEGFA	62	59	9702	10.6091	0.991194	0.12542	0.122396
DISGENET	C0678222~Breast Carcinoma	10	13.3333	0.00608771	EFNA1, CDKN1B, DDIT3, NRIP1, MDM2, ANGPTL4, ALDOA, HIF1A, ESR2, JMJD6	62	538	9702	2.90862	0.991867	0.12542	0.122396
DISGENET	C0023794~Lipoidosis	3	4	0.00620733	SCD, PPARG, NR0B2	62	19	9702	24.708	0.992603	0.12542	0.122396
DISGENET	C0010054~Coronary Arteriosclerosis	4	5.33333	0.00783371	APOA1, ANGPTL4, ESR2, VEGFA	62	65	9702	9.62978	0.997965	0.15056	0.14693
DISGENET	C1956346~Coronary Artery Disease	4	5.33333	0.00783371	APOA1, ANGPTL4, ESR2, VEGFA	62	65	9702	9.62978	0.997965	0.15056	0.14693
DISGENET	C0023893~Liver Cirrhosis, Experimental	12	16	0.00812446	CYP26A1, APP, SMAD4, STEAP4, BDH1, INSIG2, PCK1, NR0B2, ATF3, PFKP, PCK2, VEGFA	62	774	9702	2.42611	0.998385	0.15243	0.148755
DISGENET	C0006826~Malignant Neoplasms	5	6.66667	0.00844833	ATF2, CDKN1B, CITED2, MDM2, VEGFA	62	128	9702	6.11265	0.998751	0.154821	0.151088
DISGENET	C0242339~Dyslipidemias	3	4	0.00981902	PPARG, ANGPTL4, APOE	62	24	9702	19.5605	0.99958	0.171942	0.167796
DISGENET	C0598784~Dyslipoproteinemias	3	4	0.00981902	PPARG, ANGPTL4, APOE	62	24	9702	19.5605	0.99958	0.171942	0.167796
DISGENET	C0476089~Endometrial Carcinoma	4	5.33333	0.0103696	NRIP1, AXIN1, ESR2, VEGFA	62	72	9702	8.69355	0.999729	0.177636	0.173353
DISGENET	C0345904~Malignant neoplasm of liver	5	6.66667	0.0120491	EGLN3, CDKN1B, SCD, PPARG, ATF3	62	142	9702	5.51	0.999929	0.18293	0.17852
DISGENET	C0023903~Liver neoplasms	5	6.66667	0.0120491	EGLN3, CDKN1B, SCD, PPARG, ATF3	62	142	9702	5.51	0.999929	0.18293	0.17852
DISGENET	C0017919~Glycogen Storage Disease	3	4	0.0123375	PFKL, ALDOA, PGM1	62	27	9702	17.3871	0.999944	0.18293	0.17852
DISGENET	C1704429~Hypoalphalipoproteinemia, Familial	2	2.66667	0.0125358	ABCA1, APOA1	62	2	9702	156.484	0.999952	0.18293	0.17852
DISGENET	C0342898~Apolipoprotein A-I deficiency	2	2.66667	0.0125358	ABCA1, APOA1	62	2	9702	156.484	0.999952	0.18293	0.17852
DISGENET	C0338582~Sporadic Cerebral Amyloid Angiopathy	2	2.66667	0.0125358	APP, APOE	62	2	9702	156.484	0.999952	0.18293	0.17852
DISGENET	C0268194~Phosphoenolpyruvate carboxykinase deficiency	2	2.66667	0.0125358	PCK1, PCK2	62	2	9702	156.484	0.999952	0.18293	0.17852
DISGENET	C0085220~Cerebral Amyloid Angiopathy	2	2.66667	0.0125358	APP, APOE	62	2	9702	156.484	0.999952	0.18293	0.17852
DISGENET	C0007131~Non-Small Cell Lung Carcinoma	5	6.66667	0.0165144	MDM2, FOXO3, HIF1A, ATF3, VEGFA	62	156	9702	5.01551	0.999998	0.215829	0.210625
DISGENET	C0015695~Fatty Liver	4	5.33333	0.0177787	DDIT3, ANGPTL4, CYP7B1, NR0B2	62	88	9702	7.1129	0.999999	0.215829	0.210625
DISGENET	C2711227~Steatohepatitis	4	5.33333	0.0177787	DDIT3, ANGPTL4, CYP7B1, NR0B2	62	88	9702	7.1129	0.999999	0.215829	0.210625
DISGENET	C0205699~Carcinomatosis	5	6.66667	0.0190903	SCD, ANGPTL4, HIF1A, XDH, ESR2	62	163	9702	4.80012	1	0.215829	0.210625
DISGENET	C0205697~Carcinoma, Spindle-Cell	5	6.66667	0.0190903	SCD, ANGPTL4, HIF1A, XDH, ESR2	62	163	9702	4.80012	1	0.215829	0.210625
DISGENET	C0205696~Anaplastic carcinoma	5	6.66667	0.0190903	SCD, ANGPTL4, HIF1A, XDH, ESR2	62	163	9702	4.80012	1	0.215829	0.210625
DISGENET	C0205698~Undifferentiated carcinoma	5	6.66667	0.0190903	SCD, ANGPTL4, HIF1A, XDH, ESR2	62	163	9702	4.80012	1	0.215829	0.210625
DISGENET	C0740376~Middle Cerebral Artery Thrombosis	3	4	0.0191726	XDH, JUNB, ATF3	62	34	9702	13.8074	1	0.215829	0.210625
DISGENET	C0751849~Right Middle Cerebral Artery Infarction	3	4	0.0191726	XDH, JUNB, ATF3	62	34	9702	13.8074	1	0.215829	0.210625
DISGENET	C0740391~Middle Cerebral Artery Occlusion	3	4	0.0191726	XDH, JUNB, ATF3	62	34	9702	13.8074	1	0.215829	0.210625
DISGENET	C0740392~Infarction, Middle Cerebral Artery	3	4	0.0191726	XDH, JUNB, ATF3	62	34	9702	13.8074	1	0.215829	0.210625
DISGENET	C0751845~Middle Cerebral Artery Embolus	3	4	0.0191726	XDH, JUNB, ATF3	62	34	9702	13.8074	1	0.215829	0.210625
DISGENET	C0238281~Middle Cerebral Artery Syndrome	3	4	0.0191726	XDH, JUNB, ATF3	62	34	9702	13.8074	1	0.215829	0.210625
DISGENET	C0751847~Embolic Infarction, Middle Cerebral Artery	3	4	0.0191726	XDH, JUNB, ATF3	62	34	9702	13.8074	1	0.215829	0.210625
DISGENET	C0751848~Thrombotic Infarction, Middle Cerebral Artery	3	4	0.0191726	XDH, JUNB, ATF3	62	34	9702	13.8074	1	0.215829	0.210625
DISGENET	C0751846~Left Middle Cerebral Artery Infarction	3	4	0.0191726	XDH, JUNB, ATF3	62	34	9702	13.8074	1	0.215829	0.210625
DISGENET	C0007097~Carcinoma	5	6.66667	0.0194775	SCD, ANGPTL4, HIF1A, XDH, ESR2	62	164	9702	4.77085	1	0.216172	0.21096
DISGENET	C1319315~Adenocarcinoma of large intestine	4	5.33333	0.0223476	SMAD4, EEF2K, MDM2, AXIN1	62	96	9702	6.52016	1	0.244582	0.238685
DISGENET	C0020443~Hypercholesterolemia	3	4	0.0248226	ABCA1, APOA1, APOE	62	39	9702	12.0372	1	0.267948	0.261487
DISGENET	C0752306~Anoxia-Ischemia, Brain	2	2.66667	0.0310503	HIF1A, VEGFA	62	5	9702	62.5935	1	0.309717	0.302249
DISGENET	C0752305~Anoxic-Ischemic Encephalopathy	2	2.66667	0.0310503	HIF1A, VEGFA	62	5	9702	62.5935	1	0.309717	0.302249
DISGENET	C0752308~Hypoxia-Ischemia, Brain	2	2.66667	0.0310503	HIF1A, VEGFA	62	5	9702	62.5935	1	0.309717	0.302249
DISGENET	C0752307~Anoxia-Ischemia, Cerebral	2	2.66667	0.0310503	HIF1A, VEGFA	62	5	9702	62.5935	1	0.309717	0.302249
DISGENET	C0752304~Hypoxic-Ischemic Encephalopathy	2	2.66667	0.0310503	HIF1A, VEGFA	62	5	9702	62.5935	1	0.309717	0.302249
DISGENET	C0178540~Cerebral Hypoxia-Ischemia	2	2.66667	0.0310503	HIF1A, VEGFA	62	5	9702	62.5935	1	0.309717	0.302249
DISGENET	C0006142~Malignant neoplasm of breast	13	17.3333	0.0331681	ATF2, PFKFB4, CDKN1B, HIF1A, ESR2, JMJD6, EFNA1, DDIT3, NRIP1, MDM2, ANGPTL4, ALDOA, XDH	62	1074	9702	1.89413	1	0.326706	0.318829
DISGENET	C1708349~Hereditary Diffuse Gastric Cancer	6	8	0.0365283	SMAD4, CDKN1B, BNIP3, APOA1, IRS2, PPARG	62	293	9702	3.20445	1	0.355362	0.346793
DISGENET	C0038356~Stomach Neoplasms	6	8	0.0383785	SMAD4, CDKN1B, BNIP3, APOA1, IRS2, PPARG	62	297	9702	3.16129	1	0.368437	0.359553
DISGENET	C2239176~Liver carcinoma	8	10.6667	0.0388786	CDKN1B, SCD, AXIN1, APOA1, IRS2, PPARG, PCK1, NR0B2	62	507	9702	2.46917	1	0.368437	0.359553
DISGENET	C0025149~Medulloblastoma	3	4	0.039275	AXIN1, IRS2, ESR2	62	50	9702	9.38903	1	0.368437	0.359553
DISGENET	C0024623~Malignant neoplasm of stomach	6	8	0.0398036	SMAD4, CDKN1B, BNIP3, APOA1, IRS2, PPARG	62	300	9702	3.12968	1	0.369003	0.360106
DISGENET	C0152013~Adenocarcinoma of lung (disorder)	5	6.66667	0.0402782	APOA1, ULK1, ALDOA, FOXO3, JUNB	62	206	9702	3.79815	1	0.369061	0.360162
DISGENET	C0030246~Pustulosis of Palms and Soles	3	4	0.0497671	PPARG, APOE, VEGFA	62	57	9702	8.23599	1	0.445641	0.434896
DISGENET	C0033860~Psoriasis	3	4	0.0497671	PPARG, APOE, VEGFA	62	57	9702	8.23599	1	0.445641	0.434896
DISGENET	C0014170~Endometrial Neoplasms	3	4	0.0513406	NRIP1, ESR2, VEGFA	62	58	9702	8.09399	1	0.454566	0.443606
DISGENET	C0021655~Insulin Resistance	3	4	0.0545408	INSR, IRS2, PPARG	62	60	9702	7.82419	1	0.472287	0.4609
DISGENET	C0920563~Insulin Sensitivity	3	4	0.0545408	INSR, IRS2, PPARG	62	60	9702	7.82419	1	0.472287	0.4609
DISGENET	C4551637~Erythrocytosis familial, 1	2	2.66667	0.055206	EGLN2, HIF1A	62	9	9702	34.7742	1	0.472852	0.46145
DISGENET	C0002726~Amyloidosis	2	2.66667	0.0611518	APP, APOE	62	10	9702	31.2968	1	0.518147	0.505653
DISGENET	C1269683~Major Depressive Disorder	5	6.66667	0.066165	DDIT4, HIF1A, XDH, ESR2, VEGFA	62	243	9702	3.21983	1	0.552497	0.539176
DISGENET	C0282612~Prostatic Intraepithelial Neoplasias	2	2.66667	0.0670608	CDKN1B, ESR2	62	11	9702	28.4516	1	0.552497	0.539176
DISGENET	C0086692~Benign Neoplasm	3	4	0.0680104	ATF2, CITED2, VEGFA	62	68	9702	6.9037	1	0.552497	0.539176
DISGENET	C0027651~Neoplasms	3	4	0.0680104	ATF2, CITED2, VEGFA	62	68	9702	6.9037	1	0.552497	0.539176
DISGENET	C0162351~Contact hypersensitivity	3	4	0.0733187	DDIT3, FTH1, VEGFA	62	71	9702	6.61199	1	0.583587	0.569516
DISGENET	C0011616~Contact Dermatitis	3	4	0.0733187	DDIT3, FTH1, VEGFA	62	71	9702	6.61199	1	0.583587	0.569516
DISGENET	C1704417~Hyperlipoproteinemia Type IIb	2	2.66667	0.0787692	ABCA1, APOE	62	13	9702	24.0744	1	0.620701	0.605735
DISGENET	C0269102~Endometrioma	4	5.33333	0.0804354	CYP26A1, ERRFI1, NR1D2, ESR2	62	161	9702	3.8878	1	0.621403	0.60642
DISGENET	C0014175~Endometriosis	4	5.33333	0.0804354	CYP26A1, ERRFI1, NR1D2, ESR2	62	161	9702	3.8878	1	0.621403	0.60642
DISGENET	C0024115~Lung diseases	3	4	0.0861974	INSR, HIF1A, VEGFA	62	78	9702	6.01861	1	0.659452	0.643551
DISGENET	C0525045~Mood Disorders	4	5.33333	0.0887417	PFKL, PPARG, HIF1A, VEGFA	62	168	9702	3.72581	1	0.672389	0.656177
DISGENET	C0009404~Colorectal Neoplasms	5	6.66667	0.0960521	ABCA1, SMAD4, PPARG, ESR2, PGM1	62	277	9702	2.82462	1	0.688148	0.671556
DISGENET	C3888631~Monogenic diabetes	2	2.66667	0.0960613	INSR, PPARG	62	16	9702	19.5605	1	0.688148	0.671556
DISGENET	C0004763~Barrett Esophagus	2	2.66667	0.0960613	CYP26A1, PPARG	62	16	9702	19.5605	1	0.688148	0.671556
DISGENET	C0745103~Hyperlipoproteinemia Type IIa	2	2.66667	0.0960613	ABCA1, APOE	62	16	9702	19.5605	1	0.688148	0.671556
DISGENET	C1258085~Barrett Epithelium	2	2.66667	0.0960613	CYP26A1, PPARG	62	16	9702	19.5605	1	0.688148	0.671556
DISGENET	C0206726~gliosarcoma	2	2.66667	0.0960613	PPARG, VEGFA	62	16	9702	19.5605	1	0.688148	0.671556
DISGENET	C0334588~Giant Cell Glioblastoma	3	4	0.0977365	PPARG, HIF1A, VEGFA	62	84	9702	5.58871	1	0.693841	0.677111
