# Supplementary material for: Comparative Transcriptome Analysis of Organ-Specific Adaptive Responses to Hypoxia Provides Insights to Human Diseases
Source: Genes (Basel). 2022 Jun 19;13(6):1096. doi: 10.3390/genes13061096 (PMC9222487; doi:10.3390/genes13061096)
Supplement: Supplementary file 1 [file genes-13-01096-s001.zip › Table S11.xlsx]

## Sheet: Brain KEGG
Category	Term	Count	%	p-value	Genes	List Total	Pop Hits	Pop Total	Fold Enrichment	Bonferroni	Benjamini	FDR
DISGENET	C0005586~Bipolar Disorder	48	23.4146	1.62423e-23	GRIA1, CNTNAP2, GABRB1, NLGN1, MAOB, MAOA, RASGRF1, SLC1A1, CACNA1B, ITPR1, CACNA1A, GRIK4, GRIK1, ADCY2, CACNA1C, GRIK2, ADRB2, COMT, ADCY8, CPLX2, HIF1A, GRM3, RIMS1, GRIN2A, GRM5, GRM4, CCKAR, ERBB4, PDE4B, SLC17A6, SLC17A7, NCAM1, GRIA3, NTNG2, GABRA1, CHRNB3, GABRA5, GAD1, GAD2, PDYN, GRIN2B, GRIN1, VEGFA, CACNB2, ADCYAP1, PPP2R2C, DLG4, SST	169	477	9702	5.77693	2.32914e-20	2.32914e-20	2.16834e-20
DISGENET	C0036341~Schizophrenia	57	27.8049	7.47394e-19	CNTNAP2, GABRB1, GRIK4, ATP2A2, GRIK1, GRIK2, SLC6A1, COMT, GRM1, GRM3, GRM5, GRM4, CCKAR, PDE4B, DLGAP1, NOS1, UNC5C, PDYN, CACNB2, ADCYAP1, MET, GRIA1, NLGN1, ADCYAP1R1, MAOB, MAOA, SEMA3A, SLC1A1, CACNA1B, NRXN3, CACNA1C, CPLX2, EFNB2, GRIN2A, ERBB4, NPY, SLC17A6, SLC17A7, NCAM1, CACNG2, GRIA3, KCNJ3, GRIA4, SLC12A2, NTNG2, GABRA1, JUN, HOMER1, GABRA6, GABRA5, GAD1, GAD2, GRIN2C, GRIN2B, GRIN2…	169	883	9702	3.70586	1.07176e-15	5.35881e-16	4.98885e-16
DISGENET	C0004352~Autistic Disorder	30	14.6341	7.09339e-16	GRIA1, ROBO2, SEMA5A, ROBO3, CNTNAP2, GABRB1, NLGN1, MAOB, MAOA, SERPINE1, NRXN3, CACNA1C, GRIK2, ADRB2, COMT, ROBO1, RIMS1, GRIN2A, PDE4B, GABRA1, MEF2C, NLGN4X, CADM1, ITGA4, PRKCB, GABRA5, GAD1, GRIN2B, KCNMA1, MET	169	261	9702	6.59865	9.55236e-13	3.39064e-13	3.15656e-13
DISGENET	C0001973~Alcoholic Intoxication, Chronic	29	14.1463	1.10708e-14	SEMA5A, OPRD1, CNTNAP2, GABRB1, MAOB, MAOA, NRXN3, GRIK1, PIK3R1, SLC6A1, COMT, GRM1, GRM3, CDH5, GRIN2A, CCKAR, NPY, PDE4B, NCAM1, GABRA1, NLGN4X, CHRNB3, GABRA6, GABRA5, EPHA8, GAD1, PDYN, GRIN2B, GRIN1	169	268	9702	6.21209	1.59206e-11	3.96887e-12	3.69487e-12
DISGENET	C0011570~Mental Depression	28	13.6585	2.27891e-14	GRIA1, MAOB, MAOA, SLC1A1, ATP2A2, ADRB1, CACNA1C, SLC6A1, COMT, ADCY8, CPLX2, HIF1A, GRM1, GRIN2A, NPY, STMN1, PDE4B, NCAM1, GRIA3, CHRNB3, HOMER1, GABRA6, GAD1, PDYN, GRIN2B, VEGFA, ADCYAP1, DLG4	169	254	9702	6.32847	3.26372e-11	6.5359e-12	6.08468e-12
DISGENET	C0011581~Depressive disorder	29	14.1463	7.5834e-14	GRIA1, MAOB, MAOA, SLC1A1, ATP2A2, ADRB1, CACNA1C, SLC6A1, COMT, ADCY8, CPLX2, GRM1, GRIN2A, NPY, STMN1, PDE4B, NCAM1, NOS1, GRIA3, CHRNB3, CADM1, HOMER1, GABRA6, GAD1, PDYN, GRIN2B, VEGFA, ADCYAP1, DLG4	169	289	9702	5.76069	1.08738e-10	1.81243e-11	1.68731e-11
DISGENET	C0525045~Mood Disorders	22	10.7317	9.35024e-13	GABRA1, MAOB, GABRA6, MAOA, GABRA5, GAD1, ATP2A2, GAD2, ADRB1, CACNA1C, GRIK2, COMT, ADCY8, PDYN, HIF1A, VEGFA, GRM3, GRIN2A, DLG4, SST, NPY, NCAM1	169	168	9702	7.51775	1.34083e-09	1.91546e-10	1.78323e-10
DISGENET	C0041696~Unipolar Depression	24	11.7073	9.37336e-11	CNTNAP2, MAOB, HOMER1, CADM1, MAOA, PRKCB, GAD1, SERPINE1, GRIK4, ARRB1, CACNA1C, COMT, PDYN, HIF1A, GRM1, GRM5, CCKAR, DLG4, SST, NPY, SLC17A6, NCAM1, NOS1, SGK1	169	259	9702	5.31969	1.34414e-07	1.68017e-08	1.56418e-08
DISGENET	C1269683~Major Depressive Disorder	23	11.2195	1.71153e-10	CNTNAP2, MAOB, HOMER1, MAOA, PRKCB, GAD1, SERPINE1, GAD2, GRIK4, ARRB1, CACNA1C, COMT, PDYN, HIF1A, VEGFA, GRM5, CCKAR, DLG4, SST, NPY, SLC17A6, NCAM1, SGK1	169	243	9702	5.43371	2.45433e-07	2.72703e-08	2.53876e-08
DISGENET	C0005587~Depression, Bipolar	14	6.82927	7.74047e-10	NTNG2, MAOA, GAD1, GAD2, GRIK4, ADCY2, CACNA1C, GRIK2, COMT, CPLX2, RIMS1, GRIN2A, PDE4B, NCAM1	169	79	9702	10.1736	1.10998e-06	1.10998e-07	1.03335e-07
DISGENET	C0751110~Single Seizure	14	6.82927	1.72145e-08	GABRA5, SLC1A1, SLC2A1, GAD2, GRIK1, SLC6A1, PDYN, SLC8A1, SLC8A3, ADCYAP1, SST, NPY, SLC17A7, NOS1	169	101	9702	7.95758	2.46852e-05	8.51226e-07	7.92459e-07
DISGENET	C0149958~Complex partial seizures	14	6.82927	1.72145e-08	GABRA5, SLC1A1, SLC2A1, GAD2, GRIK1, SLC6A1, PDYN, SLC8A1, SLC8A3, ADCYAP1, SST, NPY, SLC17A7, NOS1	169	101	9702	7.95758	2.46852e-05	8.51226e-07	7.92459e-07
DISGENET	C0751123~Atonic Absence Seizures	14	6.82927	1.72145e-08	GABRA5, SLC1A1, SLC2A1, GAD2, GRIK1, SLC6A1, PDYN, SLC8A1, SLC8A3, ADCYAP1, SST, NPY, SLC17A7, NOS1	169	101	9702	7.95758	2.46852e-05	8.51226e-07	7.92459e-07
DISGENET	C0270846~Epileptic drop attack	14	6.82927	1.72145e-08	GABRA5, SLC1A1, SLC2A1, GAD2, GRIK1, SLC6A1, PDYN, SLC8A1, SLC8A3, ADCYAP1, SST, NPY, SLC17A7, NOS1	169	101	9702	7.95758	2.46852e-05	8.51226e-07	7.92459e-07
DISGENET	C4505436~Generalized Absence Seizures	14	6.82927	1.72145e-08	GABRA5, SLC1A1, SLC2A1, GAD2, GRIK1, SLC6A1, PDYN, SLC8A1, SLC8A3, ADCYAP1, SST, NPY, SLC17A7, NOS1	169	101	9702	7.95758	2.46852e-05	8.51226e-07	7.92459e-07
DISGENET	C3495874~Nonepileptic Seizures	14	6.82927	1.72145e-08	GABRA5, SLC1A1, SLC2A1, GAD2, GRIK1, SLC6A1, PDYN, SLC8A1, SLC8A3, ADCYAP1, SST, NPY, SLC17A7, NOS1	169	101	9702	7.95758	2.46852e-05	8.51226e-07	7.92459e-07
DISGENET	C0234535~Clonic Seizures	14	6.82927	1.72145e-08	GABRA5, SLC1A1, SLC2A1, GAD2, GRIK1, SLC6A1, PDYN, SLC8A1, SLC8A3, ADCYAP1, SST, NPY, SLC17A7, NOS1	169	101	9702	7.95758	2.46852e-05	8.51226e-07	7.92459e-07
DISGENET	C0422850~Seizures, Somatosensory	14	6.82927	1.72145e-08	GABRA5, SLC1A1, SLC2A1, GAD2, GRIK1, SLC6A1, PDYN, SLC8A1, SLC8A3, ADCYAP1, SST, NPY, SLC17A7, NOS1	169	101	9702	7.95758	2.46852e-05	8.51226e-07	7.92459e-07
DISGENET	C0422855~Vertiginous seizure	14	6.82927	1.72145e-08	GABRA5, SLC1A1, SLC2A1, GAD2, GRIK1, SLC6A1, PDYN, SLC8A1, SLC8A3, ADCYAP1, SST, NPY, SLC17A7, NOS1	169	101	9702	7.95758	2.46852e-05	8.51226e-07	7.92459e-07
DISGENET	C0422852~Seizures, Auditory	14	6.82927	1.72145e-08	GABRA5, SLC1A1, SLC2A1, GAD2, GRIK1, SLC6A1, PDYN, SLC8A1, SLC8A3, ADCYAP1, SST, NPY, SLC17A7, NOS1	169	101	9702	7.95758	2.46852e-05	8.51226e-07	7.92459e-07
DISGENET	C0422854~Gustatory seizure	14	6.82927	1.72145e-08	GABRA5, SLC1A1, SLC2A1, GAD2, GRIK1, SLC6A1, PDYN, SLC8A1, SLC8A3, ADCYAP1, SST, NPY, SLC17A7, NOS1	169	101	9702	7.95758	2.46852e-05	8.51226e-07	7.92459e-07
DISGENET	C0751496~Seizures, Sensory	14	6.82927	1.72145e-08	GABRA5, SLC1A1, SLC2A1, GAD2, GRIK1, SLC6A1, PDYN, SLC8A1, SLC8A3, ADCYAP1, SST, NPY, SLC17A7, NOS1	169	101	9702	7.95758	2.46852e-05	8.51226e-07	7.92459e-07
DISGENET	C0234533~Generalized seizures	14	6.82927	1.72145e-08	GABRA5, SLC1A1, SLC2A1, GAD2, GRIK1, SLC6A1, PDYN, SLC8A1, SLC8A3, ADCYAP1, SST, NPY, SLC17A7, NOS1	169	101	9702	7.95758	2.46852e-05	8.51226e-07	7.92459e-07
DISGENET	C0422853~Olfactory seizure	14	6.82927	1.72145e-08	GABRA5, SLC1A1, SLC2A1, GAD2, GRIK1, SLC6A1, PDYN, SLC8A1, SLC8A3, ADCYAP1, SST, NPY, SLC17A7, NOS1	169	101	9702	7.95758	2.46852e-05	8.51226e-07	7.92459e-07
DISGENET	C4317109~Epileptic Seizures	14	6.82927	1.72145e-08	GABRA5, SLC1A1, SLC2A1, GAD2, GRIK1, SLC6A1, PDYN, SLC8A1, SLC8A3, ADCYAP1, SST, NPY, SLC17A7, NOS1	169	101	9702	7.95758	2.46852e-05	8.51226e-07	7.92459e-07
DISGENET	C0022333~Jacksonian Seizure	14	6.82927	1.72145e-08	GABRA5, SLC1A1, SLC2A1, GAD2, GRIK1, SLC6A1, PDYN, SLC8A1, SLC8A3, ADCYAP1, SST, NPY, SLC17A7, NOS1	169	101	9702	7.95758	2.46852e-05	8.51226e-07	7.92459e-07
DISGENET	C0751056~Non-epileptic convulsion	14	6.82927	1.72145e-08	GABRA5, SLC1A1, SLC2A1, GAD2, GRIK1, SLC6A1, PDYN, SLC8A1, SLC8A3, ADCYAP1, SST, NPY, SLC17A7, NOS1	169	101	9702	7.95758	2.46852e-05	8.51226e-07	7.92459e-07
DISGENET	C0270824~Visual seizure	14	6.82927	1.72145e-08	GABRA5, SLC1A1, SLC2A1, GAD2, GRIK1, SLC6A1, PDYN, SLC8A1, SLC8A3, ADCYAP1, SST, NPY, SLC17A7, NOS1	169	101	9702	7.95758	2.46852e-05	8.51226e-07	7.92459e-07
DISGENET	C0751494~Convulsive Seizures	14	6.82927	1.72145e-08	GABRA5, SLC1A1, SLC2A1, GAD2, GRIK1, SLC6A1, PDYN, SLC8A1, SLC8A3, ADCYAP1, SST, NPY, SLC17A7, NOS1	169	101	9702	7.95758	2.46852e-05	8.51226e-07	7.92459e-07
DISGENET	C0270844~Tonic Seizures	14	6.82927	1.94356e-08	GABRA5, SLC1A1, SLC2A1, GAD2, GRIK1, SLC6A1, PDYN, SLC8A1, SLC8A3, ADCYAP1, SST, NPY, SLC17A7, NOS1	169	102	9702	7.87957	2.78702e-05	8.70957e-07	8.10828e-07
DISGENET	C4316903~Absence Seizures	14	6.82927	1.94356e-08	GABRA5, SLC1A1, SLC2A1, GAD2, GRIK1, SLC6A1, PDYN, SLC8A1, SLC8A3, ADCYAP1, SST, NPY, SLC17A7, NOS1	169	102	9702	7.87957	2.78702e-05	8.70957e-07	8.10828e-07
DISGENET	C4048158~Convulsions	14	6.82927	1.94356e-08	GABRA5, SLC1A1, SLC2A1, GAD2, GRIK1, SLC6A1, PDYN, SLC8A1, SLC8A3, ADCYAP1, SST, NPY, SLC17A7, NOS1	169	102	9702	7.87957	2.78702e-05	8.70957e-07	8.10828e-07
DISGENET	C0494475~Tonic - clonic seizures	14	6.82927	2.46701e-08	GABRA5, SLC1A1, SLC2A1, GAD2, GRIK1, SLC6A1, PDYN, SLC8A1, SLC8A3, ADCYAP1, SST, NPY, SLC17A7, NOS1	169	104	9702	7.72804	3.53763e-05	1.01077e-06	9.40989e-07
DISGENET	C4317123~Myoclonic Seizures	14	6.82927	2.46701e-08	GABRA5, SLC1A1, SLC2A1, GAD2, GRIK1, SLC6A1, PDYN, SLC8A1, SLC8A3, ADCYAP1, SST, NPY, SLC17A7, NOS1	169	104	9702	7.72804	3.53763e-05	1.01077e-06	9.40989e-07
DISGENET	C0751495~Seizures, Focal	14	6.82927	2.46701e-08	GABRA5, SLC1A1, SLC2A1, GAD2, GRIK1, SLC6A1, PDYN, SLC8A1, SLC8A3, ADCYAP1, SST, NPY, SLC17A7, NOS1	169	104	9702	7.72804	3.53763e-05	1.01077e-06	9.40989e-07
DISGENET	C0014558~Uncinate Epilepsy	8	3.90244	7.9969e-08	GRM3, SLC12A2, GRM5, GRM4, NPY, SLC1A1, GRM1, VEGFA	169	23	9702	19.9681	0.000114669	2.9404e-06	2.7374e-06
DISGENET	C0393672~Epilepsy, Benign Psychomotor, Childhood	8	3.90244	7.9969e-08	GRM3, SLC12A2, GRM5, GRM4, NPY, SLC1A1, GRM1, VEGFA	169	23	9702	19.9681	0.000114669	2.9404e-06	2.7374e-06
DISGENET	C0393682~Epilepsy, Lateral Temporal	8	3.90244	7.9969e-08	GRM3, SLC12A2, GRM5, GRM4, NPY, SLC1A1, GRM1, VEGFA	169	23	9702	19.9681	0.000114669	2.9404e-06	2.7374e-06
DISGENET	C0014556~Epilepsy, Temporal Lobe	8	3.90244	7.9969e-08	GRM3, SLC12A2, GRM5, GRM4, NPY, SLC1A1, GRM1, VEGFA	169	23	9702	19.9681	0.000114669	2.9404e-06	2.7374e-06
DISGENET	C0311335~Grand Mal Status Epilepticus	11	5.36585	1.96391e-07	SLC8A3, MEF2C, GRM5, JUN, EPO, KCNMA1, ATP2A2, NOS1, SLC8A1, GRM1, VEGFA	169	67	9702	9.42524	0.000281585	6.25833e-06	5.82627e-06
DISGENET	C0751524~Simple Partial Status Epilepticus	11	5.36585	1.96391e-07	SLC8A3, MEF2C, GRM5, JUN, EPO, KCNMA1, ATP2A2, NOS1, SLC8A1, GRM1, VEGFA	169	67	9702	9.42524	0.000281585	6.25833e-06	5.82627e-06
DISGENET	C0751523~Non-Convulsive Status Epilepticus	11	5.36585	1.96391e-07	SLC8A3, MEF2C, GRM5, JUN, EPO, KCNMA1, ATP2A2, NOS1, SLC8A1, GRM1, VEGFA	169	67	9702	9.42524	0.000281585	6.25833e-06	5.82627e-06
DISGENET	C0270823~Petit mal status	11	5.36585	1.96391e-07	SLC8A3, MEF2C, GRM5, JUN, EPO, KCNMA1, ATP2A2, NOS1, SLC8A1, GRM1, VEGFA	169	67	9702	9.42524	0.000281585	6.25833e-06	5.82627e-06
DISGENET	C0393734~Complex Partial Status Epilepticus	11	5.36585	1.96391e-07	SLC8A3, MEF2C, GRM5, JUN, EPO, KCNMA1, ATP2A2, NOS1, SLC8A1, GRM1, VEGFA	169	67	9702	9.42524	0.000281585	6.25833e-06	5.82627e-06
DISGENET	C0751522~Status Epilepticus, Subclinical	11	5.36585	1.96391e-07	SLC8A3, MEF2C, GRM5, JUN, EPO, KCNMA1, ATP2A2, NOS1, SLC8A1, GRM1, VEGFA	169	67	9702	9.42524	0.000281585	6.25833e-06	5.82627e-06
DISGENET	C0038220~Status Epilepticus	11	5.36585	2.26847e-07	SLC8A3, MEF2C, GRM5, JUN, EPO, KCNMA1, ATP2A2, NOS1, SLC8A1, GRM1, VEGFA	169	68	9702	9.28663	0.000325246	7.07171e-06	6.5835e-06
DISGENET	C0024713~Manic Disorder	11	5.36585	3.44508e-07	NTNG2, RIMS1, GRIN2A, GAD1, PDE4B, GAD2, ADCY2, GRIK2, CACNA1C, COMT, CPLX2	169	71	9702	8.89424	0.000493902	1.05112e-05	9.78548e-06
DISGENET	C0338831~Manic	11	5.36585	8.45907e-07	NTNG2, RIMS1, GRIN2A, GAD1, PDE4B, GAD2, ADCY2, GRIK2, CACNA1C, COMT, CPLX2	169	78	9702	8.09604	0.0012123	2.52715e-05	2.35268e-05
DISGENET	C0036572~Seizures	17	8.29268	1.09545e-06	NTNG2, GABRA5, SLC1A1, CACNA1B, SLC2A1, GAD2, GRIK1, SLC6A1, PDYN, CACNA1E, SLC8A1, SLC8A3, ADCYAP1, SST, NPY, SLC17A7, NOS1	169	218	9702	4.47679	0.00156965	3.20588e-05	2.98455e-05
DISGENET	C0600427~Cocaine Dependence	13	6.34146	4.87236e-06	GRIA1, OPRD1, CHRNB3, HOMER1, MAOA, GAD1, GAD2, COMT, PDYN, GRIN1, GRM5, CAMK4, NPY	169	139	9702	5.36912	0.00696262	0.000139739	0.000130092
DISGENET	C0086237~Epilepsy, Cryptogenic	10	4.87805	1.12082e-05	OPRD1, SLC12A2, CNTNAP2, MEF2C, GRIN2A, NPY, SLC1A1, SLC6A1, GRIN2B, GRM1	169	82	9702	7.00101	0.0159442	0.000303256	0.00028232
DISGENET	C0751111~Awakening Epilepsy	10	4.87805	1.12082e-05	OPRD1, SLC12A2, CNTNAP2, MEF2C, GRIN2A, NPY, SLC1A1, SLC6A1, GRIN2B, GRM1	169	82	9702	7.00101	0.0159442	0.000303256	0.00028232
DISGENET	C0236018~Aura	10	4.87805	1.12082e-05	OPRD1, SLC12A2, CNTNAP2, MEF2C, GRIN2A, NPY, SLC1A1, SLC6A1, GRIN2B, GRM1	169	82	9702	7.00101	0.0159442	0.000303256	0.00028232
DISGENET	C0020538~Hypertensive disease	14	6.82927	2.46791e-05	SLC12A2, DUSP5, JUN, VCAM1, NCF1, EPO, SERPINE1, ADRB1, CACNA1C, HIF1A, SLC9A3R2, HSD11B2, EDNRA, LEPR	169	190	9702	4.23008	0.0347714	0.000655368	0.000610123
DISGENET	C0751198~Hepatic Stupor	5	2.43902	5.49052e-05	GABRA1, GABRB1, MAOB, MAOA, NOS1	169	13	9702	22.0801	0.0757162	0.00135748	0.00126377
DISGENET	C0019147~Hepatic Coma	5	2.43902	5.49052e-05	GABRA1, GABRB1, MAOB, MAOA, NOS1	169	13	9702	22.0801	0.0757162	0.00135748	0.00126377
DISGENET	C0751197~Fulminant Hepatic Failure with Cerebral Edema	5	2.43902	5.49052e-05	GABRA1, GABRB1, MAOB, MAOA, NOS1	169	13	9702	22.0801	0.0757162	0.00135748	0.00126377
DISGENET	C0019151~Hepatic Encephalopathy	5	2.43902	5.49052e-05	GABRA1, GABRB1, MAOB, MAOA, NOS1	169	13	9702	22.0801	0.0757162	0.00135748	0.00126377
DISGENET	C0014544~Epilepsy	10	4.87805	0.000109421	OPRD1, SLC12A2, CNTNAP2, MEF2C, GRIN2A, NPY, SLC1A1, SLC6A1, GRIN2B, GRM1	169	109	9702	5.26682	0.145226	0.00265948	0.00247587
DISGENET	C0205699~Carcinomatosis	12	5.85366	0.000119525	SLC12A2, ALCAM, DES, RASA1, STMN1, ENO1, PIK3R1, EZR, SGK1, HIF1A, MET, GNAI2	169	163	9702	4.22638	0.157523	0.00272062	0.0025328
DISGENET	C0205697~Carcinoma, Spindle-Cell	12	5.85366	0.000119525	SLC12A2, ALCAM, DES, RASA1, STMN1, ENO1, PIK3R1, EZR, SGK1, HIF1A, MET, GNAI2	169	163	9702	4.22638	0.157523	0.00272062	0.0025328
DISGENET	C0205698~Undifferentiated carcinoma	12	5.85366	0.000119525	SLC12A2, ALCAM, DES, RASA1, STMN1, ENO1, PIK3R1, EZR, SGK1, HIF1A, MET, GNAI2	169	163	9702	4.22638	0.157523	0.00272062	0.0025328
DISGENET	C0205696~Anaplastic carcinoma	12	5.85366	0.000119525	SLC12A2, ALCAM, DES, RASA1, STMN1, ENO1, PIK3R1, EZR, SGK1, HIF1A, MET, GNAI2	169	163	9702	4.22638	0.157523	0.00272062	0.0025328
DISGENET	C0007097~Carcinoma	12	5.85366	0.000126232	SLC12A2, ALCAM, DES, RASA1, STMN1, ENO1, PIK3R1, EZR, SGK1, HIF1A, MET, GNAI2	169	164	9702	4.20061	0.165588	0.00282838	0.00263312
DISGENET	C0033578~Prostatic Neoplasms	25	12.1951	0.000147833	ROBO2, NRP1, SERPINE1, ITPR1, PIK3R2, ADRB2, PIK3R1, SLC4A2, COMT, HIF1A, PVR, SLC5A5, ROBO1, STMN1, CD276, SLC12A2, BAD, GPX3, VEGFA, CXCL12, CLDN7, EZR, SLC26A4, MET, FGF10	169	616	9702	2.32988	0.191042	0.00315848	0.00294043
DISGENET	C0376358~Malignant neoplasm of prostate	25	12.1951	0.000147833	ROBO2, NRP1, SERPINE1, ITPR1, PIK3R2, ADRB2, PIK3R1, SLC4A2, COMT, HIF1A, PVR, SLC5A5, ROBO1, STMN1, CD276, SLC12A2, BAD, GPX3, VEGFA, CXCL12, CLDN7, EZR, SLC26A4, MET, FGF10	169	616	9702	2.32988	0.191042	0.00315848	0.00294043
DISGENET	C0013146~Drug abuse	10	4.87805	0.000165193	OPRD1, GRM5, ABLIM1, PDE1C, NPY, PRKCE, NRXN3, GRIK2, ATP1B1, GRIA4	169	115	9702	4.99202	0.210934	0.00315848	0.00294043
DISGENET	C0013222~Drug Use Disorders	10	4.87805	0.000165193	OPRD1, GRM5, ABLIM1, PDE1C, NPY, PRKCE, NRXN3, GRIK2, ATP1B1, GRIA4	169	115	9702	4.99202	0.210934	0.00315848	0.00294043
DISGENET	C0029231~Organic Mental Disorders, Substance-Induced	10	4.87805	0.000165193	OPRD1, GRM5, ABLIM1, PDE1C, NPY, PRKCE, NRXN3, GRIK2, ATP1B1, GRIA4	169	115	9702	4.99202	0.210934	0.00315848	0.00294043
DISGENET	C4316881~Prescription Drug Abuse	10	4.87805	0.000165193	OPRD1, GRM5, ABLIM1, PDE1C, NPY, PRKCE, NRXN3, GRIK2, ATP1B1, GRIA4	169	115	9702	4.99202	0.210934	0.00315848	0.00294043
DISGENET	C0038586~Substance Use Disorders	10	4.87805	0.000165193	OPRD1, GRM5, ABLIM1, PDE1C, NPY, PRKCE, NRXN3, GRIK2, ATP1B1, GRIA4	169	115	9702	4.99202	0.210934	0.00315848	0.00294043
DISGENET	C1510472~Drug Dependence	10	4.87805	0.000165193	OPRD1, GRM5, ABLIM1, PDE1C, NPY, PRKCE, NRXN3, GRIK2, ATP1B1, GRIA4	169	115	9702	4.99202	0.210934	0.00315848	0.00294043
DISGENET	C0013170~Drug habituation	10	4.87805	0.000165193	OPRD1, GRM5, ABLIM1, PDE1C, NPY, PRKCE, NRXN3, GRIK2, ATP1B1, GRIA4	169	115	9702	4.99202	0.210934	0.00315848	0.00294043
DISGENET	C0236969~Substance-Related Disorders	10	4.87805	0.000165193	OPRD1, GRM5, ABLIM1, PDE1C, NPY, PRKCE, NRXN3, GRIK2, ATP1B1, GRIA4	169	115	9702	4.99202	0.210934	0.00315848	0.00294043
DISGENET	C0038580~Substance Dependence	10	4.87805	0.000165193	OPRD1, GRM5, ABLIM1, PDE1C, NPY, PRKCE, NRXN3, GRIK2, ATP1B1, GRIA4	169	115	9702	4.99202	0.210934	0.00315848	0.00294043
DISGENET	C1257925~Mammary Carcinoma, Animal	11	5.36585	0.000172528	SLC12A2, ALCAM, DES, RASA1, STMN1, ENO1, PIK3R1, COMT, EZR, SGK1, GNAI2	169	142	9702	4.44712	0.219192	0.00321305	0.00299123
DISGENET	C0024667~Animal Mammary Neoplasms	11	5.36585	0.000172528	SLC12A2, ALCAM, DES, RASA1, STMN1, ENO1, PIK3R1, COMT, EZR, SGK1, GNAI2	169	142	9702	4.44712	0.219192	0.00321305	0.00299123
DISGENET	C0740858~Substance abuse problem	10	4.87805	0.000176466	OPRD1, GRM5, ABLIM1, PDE1C, NPY, PRKCE, NRXN3, GRIK2, ATP1B1, GRIA4	169	116	9702	4.94899	0.22359	0.00324426	0.00302029
DISGENET	C0236736~Cocaine-Related Disorders	10	4.87805	0.000188374	GRIA1, GRM5, HOMER1, NPY, GAD1, CAMK4, GAD2, COMT, PDYN, GRIN1	169	117	9702	4.90669	0.236738	0.00341934	0.00318328
DISGENET	C0009171~Cocaine Abuse	10	4.87805	0.000348843	GRIA1, GRM5, HOMER1, NPY, GAD1, CAMK4, GAD2, COMT, PDYN, GRIN1	169	127	9702	4.52034	0.393669	0.00625302	0.00582132
DISGENET	C0038587~Substance Withdrawal Syndrome	7	3.41463	0.000473701	OPRD1, GRIA1, GRIN2A, NPY, ADCY1, SLC6A1, ADCY8	169	58	9702	6.92859	0.493103	0.00818418	0.00761916
DISGENET	C0087169~Withdrawal Symptoms	7	3.41463	0.000473701	OPRD1, GRIA1, GRIN2A, NPY, ADCY1, SLC6A1, ADCY8	169	58	9702	6.92859	0.493103	0.00818418	0.00761916
DISGENET	C0086189~Drug Withdrawal Symptoms	7	3.41463	0.000473701	OPRD1, GRIA1, GRIN2A, NPY, ADCY1, SLC6A1, ADCY8	169	58	9702	6.92859	0.493103	0.00818418	0.00761916
DISGENET	C1510586~Autism Spectrum Disorders	8	3.90244	0.00065418	CNTNAP2, MEF2C, NLGN4X, DLG4, GABRA5, SLC1A1, NRXN3, GRIN2B	169	85	9702	5.40313	0.608747	0.0111678	0.0103968
DISGENET	C0751295~Memory Loss	6	2.92683	0.000829257	GABRA5, NPY, SLC17A6, SLC17A7, COMT, VEGFA	169	43	9702	8.01046	0.695672	0.0133613	0.0124389
DISGENET	C0751292~Age-Related Memory Disorders	6	2.92683	0.000829257	GABRA5, NPY, SLC17A6, SLC17A7, COMT, VEGFA	169	43	9702	8.01046	0.695672	0.0133613	0.0124389
DISGENET	C0025261~Memory Disorders	6	2.92683	0.000829257	GABRA5, NPY, SLC17A6, SLC17A7, COMT, VEGFA	169	43	9702	8.01046	0.695672	0.0133613	0.0124389
DISGENET	C0751294~Memory Disorder, Spatial	6	2.92683	0.000829257	GABRA5, NPY, SLC17A6, SLC17A7, COMT, VEGFA	169	43	9702	8.01046	0.695672	0.0133613	0.0124389
DISGENET	C0751293~Memory Disorder, Semantic	6	2.92683	0.000829257	GABRA5, NPY, SLC17A6, SLC17A7, COMT, VEGFA	169	43	9702	8.01046	0.695672	0.0133613	0.0124389
DISGENET	C0233794~Memory impairment	6	2.92683	0.000922638	GABRA5, NPY, SLC17A6, SLC17A7, COMT, VEGFA	169	44	9702	7.8284	0.733844	0.0147007	0.0136858
DISGENET	C0085762~Alcohol abuse	7	3.41463	0.00102756	GABRA1, CCKAR, MAOA, NPY, PDE4B, COMT, PDYN	169	67	9702	5.99788	0.771057	0.0161926	0.0150747
DISGENET	C0024668~Mammary Neoplasms, Experimental	10	4.87805	0.00146521	SLC12A2, ALCAM, DES, RASA1, STMN1, ENO1, PIK3R1, EZR, SGK1, GNAI2	169	155	9702	3.70376	0.877867	0.0226567	0.0210925
DISGENET	C0036337~Schizoaffective Disorder	5	2.43902	0.00146937	GRIA1, SST, NPY, CPLX2, GRIN1	169	29	9702	9.89798	0.878595	0.0226567	0.0210925
DISGENET	C0543888~Epileptic encephalopathy	5	2.43902	0.00167278	GABRA1, SLC2A1, CACNA1A, GRIN2B, GRIN1	169	30	9702	9.56805	0.909352	0.0255188	0.023757
DISGENET	C0013386~Dyskinesia, Drug-Induced	4	1.95122	0.00199098	HOMER1, GAD1, RASGRF1, PDYN	169	15	9702	15.3089	0.942611	0.0297402	0.027687
DISGENET	C0751088~Dyskinesia, Medication-Induced	4	1.95122	0.00199098	HOMER1, GAD1, RASGRF1, PDYN	169	15	9702	15.3089	0.942611	0.0297402	0.027687
DISGENET	C3887506~Hyperkinesia	5	2.43902	0.00213677	GRIA1, CNTNAP2, NPY, ADCY1, ADCY8	169	32	9702	8.97004	0.953459	0.0312667	0.0291081
DISGENET	C0751217~Hyperkinesia, Generalized	5	2.43902	0.00213677	GRIA1, CNTNAP2, NPY, ADCY1, ADCY8	169	32	9702	8.97004	0.953459	0.0312667	0.0291081
DISGENET	C0004096~Asthma	7	3.41463	0.00257308	HSD11B2, ADCYAP1R1, NPY, PDE4B, ADCY2, ADRB2, VEGFA	169	80	9702	5.02322	0.975141	0.0372707	0.0346976
DISGENET	C0018801~Heart failure	8	3.90244	0.00294225	ITGB1, EDNRA, ROCK2, SERPINE1, ATP2A2, ADRB1, HIF1A, VEGFA	169	110	9702	4.17515	0.985381	0.0401827	0.0374086
DISGENET	C0018802~Congestive heart failure	8	3.90244	0.00294225	ITGB1, EDNRA, ROCK2, SERPINE1, ATP2A2, ADRB1, HIF1A, VEGFA	169	110	9702	4.17515	0.985381	0.0401827	0.0374086
DISGENET	C0023212~Left-Sided Heart Failure	8	3.90244	0.00294225	ITGB1, EDNRA, ROCK2, SERPINE1, ATP2A2, ADRB1, HIF1A, VEGFA	169	110	9702	4.17515	0.985381	0.0401827	0.0374086
DISGENET	C0235527~Heart Failure, Right-Sided	8	3.90244	0.00294225	ITGB1, EDNRA, ROCK2, SERPINE1, ATP2A2, ADRB1, HIF1A, VEGFA	169	110	9702	4.17515	0.985381	0.0401827	0.0374086
DISGENET	C1959583~Myocardial Failure	8	3.90244	0.00294225	ITGB1, EDNRA, ROCK2, SERPINE1, ATP2A2, ADRB1, HIF1A, VEGFA	169	110	9702	4.17515	0.985381	0.0401827	0.0374086
DISGENET	C1961112~Heart Decompensation	8	3.90244	0.00294225	ITGB1, EDNRA, ROCK2, SERPINE1, ATP2A2, ADRB1, HIF1A, VEGFA	169	110	9702	4.17515	0.985381	0.0401827	0.0374086
DISGENET	C0031511~Pheochromocytoma	4	1.95122	0.00403007	EGLN1, MAOB, MAOA, COMT	169	19	9702	12.086	0.996944	0.0542397	0.0504951
DISGENET	C0009241~Cognition Disorders	5	2.43902	0.00404717	MAOA, EPO, SLC1A1, COMT, MET	169	38	9702	7.55372	0.997019	0.0542397	0.0504951
DISGENET	C0036902~Sexual Arousal Disorder	3	1.46341	0.00427117	GRIA1, GRIK2, GRIA3	169	6	9702	28.7041	0.997841	0.0546863	0.0509109
DISGENET	C0016722~Frigidity	3	1.46341	0.00427117	GRIA1, GRIK2, GRIA3	169	6	9702	28.7041	0.997841	0.0546863	0.0509109
DISGENET	C0029261~Orgasmic Disorder	3	1.46341	0.00427117	GRIA1, GRIK2, GRIA3	169	6	9702	28.7041	0.997841	0.0546863	0.0509109
DISGENET	C0033953~Psychosexual Disorders	3	1.46341	0.00427117	GRIA1, GRIK2, GRIA3	169	6	9702	28.7041	0.997841	0.0546863	0.0509109
DISGENET	C0020594~Hypoactive Sexual Desire Disorder	3	1.46341	0.00427117	GRIA1, GRIK2, GRIA3	169	6	9702	28.7041	0.997841	0.0546863	0.0509109
DISGENET	C1535926~Neurodevelopmental Disorders	7	3.41463	0.00543156	RIMS1, MEF2C, DLG4, ITPR1, DLGAP1, SLC6A1, GRIN2B	169	93	9702	4.32105	0.999594	0.0686776	0.0639363
DISGENET	C0678222~Breast Carcinoma	19	9.26829	0.00545973	JUN, CADM1, TFRC, SLC2A1, CXCR4, ENO1, GRIK2, COMT, HIF1A, SLC5A5, GNAI2, EFNA1, CDH5, DES, CXCL12, ERBB4, STMN1, LEPR, FGF10	169	538	9702	2.02743	0.999611	0.0686776	0.0639363
DISGENET	C0600272~Morphine Abuse	3	1.46341	0.00591179	GRIA1, GRIN2A, NOS1	169	7	9702	24.6036	0.999797	0.073082	0.0680366
DISGENET	C0026552~Morphine Dependence	3	1.46341	0.00591179	GRIA1, GRIN2A, NOS1	169	7	9702	24.6036	0.999797	0.073082	0.0680366
DISGENET	C0001956~Alcohol Use Disorder	5	2.43902	0.00686967	CCKAR, NPY, PDE4B, COMT, PDYN	169	44	9702	6.52367	0.999949	0.0841975	0.0783847
DISGENET	C0750970~Cytotoxic Brain Edema	3	1.46341	0.00779308	MYL9, NTN1, MYLK	169	8	9702	21.5281	0.999987	0.0908559	0.0845834
DISGENET	C0472388~Cytotoxic Cerebral Edema	3	1.46341	0.00779308	MYL9, NTN1, MYLK	169	8	9702	21.5281	0.999987	0.0908559	0.0845834
DISGENET	C0750969~Vasogenic Brain Edema	3	1.46341	0.00779308	MYL9, NTN1, MYLK	169	8	9702	21.5281	0.999987	0.0908559	0.0845834
DISGENET	C1527311~Brain Edema	3	1.46341	0.00779308	MYL9, NTN1, MYLK	169	8	9702	21.5281	0.999987	0.0908559	0.0845834
DISGENET	C0472387~Vasogenic Cerebral Edema	3	1.46341	0.00779308	MYL9, NTN1, MYLK	169	8	9702	21.5281	0.999987	0.0908559	0.0845834
DISGENET	C0006114~Cerebral Edema	3	1.46341	0.00779308	MYL9, NTN1, MYLK	169	8	9702	21.5281	0.999987	0.0908559	0.0845834
DISGENET	C1142166~Brugada Syndrome (disorder)	4	1.95122	0.00790171	CACNB2, KCNJ8, CACNA1C, SCN1B	169	24	9702	9.56805	0.999989	0.0913794	0.0850708
DISGENET	C0033975~Psychotic Disorders	7	3.41463	0.00806843	SLC12A2, CCKAR, MAOA, GRIK4, CACNA1C, CPLX2, GRIN1	169	101	9702	3.97879	0.999991	0.092561	0.0861708
DISGENET	C1257931~Mammary Neoplasms, Human	18	8.78049	0.00939859	JUN, CADM1, TFRC, SLC2A1, CXCR4, ENO1, GRIK2, COMT, HIF1A, SLC5A5, GNAI2, EFNA1, CDH5, DES, CXCL12, STMN1, LEPR, FGF10	169	525	9702	1.96828	0.999999	0.106123	0.0987962
DISGENET	C4704874~Mammary Carcinoma, Human	18	8.78049	0.00939859	JUN, CADM1, TFRC, SLC2A1, CXCR4, ENO1, GRIK2, COMT, HIF1A, SLC5A5, GNAI2, EFNA1, CDH5, DES, CXCL12, STMN1, LEPR, FGF10	169	525	9702	1.96828	0.999999	0.106123	0.0987962
DISGENET	C1458155~Mammary Neoplasms	18	8.78049	0.00973978	JUN, CADM1, TFRC, SLC2A1, CXCR4, ENO1, GRIK2, COMT, HIF1A, SLC5A5, GNAI2, EFNA1, CDH5, DES, CXCL12, STMN1, LEPR, FGF10	169	527	9702	1.96081	0.999999	0.109116	0.101583
DISGENET	C4551637~Erythrocytosis familial, 1	3	1.46341	0.0099063	EGLN2, EPO, HIF1A	169	9	9702	19.1361	0.999999	0.110121	0.102519
DISGENET	C0151744~Myocardial Ischemia	9	4.39024	0.011536	VCAM1, KCNJ8, TFRC, PRKCE, PDE4B, ADRB1, ADRB2, SLC8A1, VEGFA	169	176	9702	2.93565	1	0.126313	0.117593
DISGENET	C0023903~Liver neoplasms	8	3.90244	0.0116271	EFNB2, JUN, EGLN3, GPX3, PRKCE, SERPINE1, SLC2A1, GRIK2	169	142	9702	3.23427	1	0.126313	0.117593
DISGENET	C0345904~Malignant neoplasm of liver	8	3.90244	0.0116271	EFNB2, JUN, EGLN3, GPX3, PRKCE, SERPINE1, SLC2A1, GRIK2	169	142	9702	3.23427	1	0.126313	0.117593
DISGENET	C0020649~Hypotension	5	2.43902	0.0131464	GRIA1, MAOB, MAOA, PDYN, GRIN2B	169	53	9702	5.41588	1	0.139184	0.129575
DISGENET	C0751265~Learning Disabilities	4	1.95122	0.0133942	GRIA1, SLC17A6, SLC17A7, VEGFA	169	29	9702	7.91838	1	0.139184	0.129575
DISGENET	C0751263~Learning Disturbance	4	1.95122	0.0133942	GRIA1, SLC17A6, SLC17A7, VEGFA	169	29	9702	7.91838	1	0.139184	0.129575
DISGENET	C1330966~Developmental Academic Disorder	4	1.95122	0.0133942	GRIA1, SLC17A6, SLC17A7, VEGFA	169	29	9702	7.91838	1	0.139184	0.129575
DISGENET	C0751262~Adult Learning Disorders	4	1.95122	0.0133942	GRIA1, SLC17A6, SLC17A7, VEGFA	169	29	9702	7.91838	1	0.139184	0.129575
DISGENET	C0023186~Learning Disorders	4	1.95122	0.0133942	GRIA1, SLC17A6, SLC17A7, VEGFA	169	29	9702	7.91838	1	0.139184	0.129575
DISGENET	C0027626~Neoplasm Invasiveness	9	4.39024	0.0146085	ITGB1, CXCL12, EPO, CXCR4, NCAM1, ENO1, HIF1A, MET, MYLK	169	184	9702	2.80801	1	0.143372	0.133474
DISGENET	C1399226~Ectopic rhythm	3	1.46341	0.0147948	CACNB2, KCNJ8, SCN1B	169	11	9702	15.6568	1	0.143372	0.133474
DISGENET	C0264893~Nodal rhythm disorder	3	1.46341	0.0147948	CACNB2, KCNJ8, SCN1B	169	11	9702	15.6568	1	0.143372	0.133474
DISGENET	C2748542~CARDIAC CONDUCTION DEFECT, NONSPECIFIC (disorder)	3	1.46341	0.0147948	CACNB2, KCNJ8, SCN1B	169	11	9702	15.6568	1	0.143372	0.133474
DISGENET	C0348626~Other specified cardiac arrhythmias	3	1.46341	0.0147948	CACNB2, KCNJ8, SCN1B	169	11	9702	15.6568	1	0.143372	0.133474
DISGENET	C0151879~Shortened QT interval	3	1.46341	0.0147948	CACNB2, KCNJ8, CACNA1C	169	11	9702	15.6568	1	0.143372	0.133474
DISGENET	C2936719~Mechanical Allodynia	6	2.92683	0.0150971	PRKCE, NOS1, COMT, PDYN, GRIN2B, GRIN1	169	84	9702	4.10059	1	0.143372	0.133474
DISGENET	C0751214~Hyperalgesia, Thermal	6	2.92683	0.0150971	PRKCE, NOS1, COMT, PDYN, GRIN2B, GRIN1	169	84	9702	4.10059	1	0.143372	0.133474
DISGENET	C0751211~Hyperalgesia, Primary	6	2.92683	0.0150971	PRKCE, NOS1, COMT, PDYN, GRIN2B, GRIN1	169	84	9702	4.10059	1	0.143372	0.133474
DISGENET	C0458247~Allodynia	6	2.92683	0.0150971	PRKCE, NOS1, COMT, PDYN, GRIN2B, GRIN1	169	84	9702	4.10059	1	0.143372	0.133474
DISGENET	C0751213~Tactile Allodynia	6	2.92683	0.0150971	PRKCE, NOS1, COMT, PDYN, GRIN2B, GRIN1	169	84	9702	4.10059	1	0.143372	0.133474
DISGENET	C0020429~Hyperalgesia	6	2.92683	0.0150971	PRKCE, NOS1, COMT, PDYN, GRIN2B, GRIN1	169	84	9702	4.10059	1	0.143372	0.133474
DISGENET	C0751212~Hyperalgesia, Secondary	6	2.92683	0.0150971	PRKCE, NOS1, COMT, PDYN, GRIN2B, GRIN1	169	84	9702	4.10059	1	0.143372	0.133474
DISGENET	C0027055~Myocardial Reperfusion Injury	6	2.92683	0.0158226	TFRC, ATP2A2, ADRB1, HIF1A, SLC8A1, VEGFA	169	85	9702	4.05235	1	0.149274	0.138968
DISGENET	C0004936~Mental disorders	3	1.46341	0.0175537	MAOA, NOS1, COMT	169	12	9702	14.3521	1	0.160331	0.149262
DISGENET	C0038644~Sudden infant death syndrome	3	1.46341	0.0175537	KCNJ8, MAOA, SCN1B	169	12	9702	14.3521	1	0.160331	0.149262
DISGENET	C0376338~Diagnosis, Psychiatric	3	1.46341	0.0175537	MAOA, NOS1, COMT	169	12	9702	14.3521	1	0.160331	0.149262
DISGENET	C0004930~Behavior Disorders	3	1.46341	0.0175537	MAOA, NOS1, COMT	169	12	9702	14.3521	1	0.160331	0.149262
DISGENET	C4046029~Mental Disorders, Severe	3	1.46341	0.0175537	MAOA, NOS1, COMT	169	12	9702	14.3521	1	0.160331	0.149262
DISGENET	C4551804~Brugada Syndrome 1	3	1.46341	0.0205119	CACNB2, KCNJ8, SCN1B	169	13	9702	13.2481	1	0.186165	0.173312
DISGENET	C0271678~Diabetic Mononeuropathy	3	1.46341	0.0236617	GRM5, LEPR, SGK1	169	14	9702	12.3018	1	0.203179	0.189152
DISGENET	C0271680~Diabetic Polyneuropathies	3	1.46341	0.0236617	GRM5, LEPR, SGK1	169	14	9702	12.3018	1	0.203179	0.189152
DISGENET	C0751074~Diabetic Neuralgia	3	1.46341	0.0236617	GRM5, LEPR, SGK1	169	14	9702	12.3018	1	0.203179	0.189152
DISGENET	C0271673~Symmetric Diabetic Proximal Motor Neuropathy	3	1.46341	0.0236617	GRM5, LEPR, SGK1	169	14	9702	12.3018	1	0.203179	0.189152
DISGENET	C0271685~Diabetic Amyotrophy	3	1.46341	0.0236617	GRM5, LEPR, SGK1	169	14	9702	12.3018	1	0.203179	0.189152
DISGENET	C0271674~Asymmetric Diabetic Proximal Motor Neuropathy	3	1.46341	0.0236617	GRM5, LEPR, SGK1	169	14	9702	12.3018	1	0.203179	0.189152
DISGENET	C0271686~Diabetic Autonomic Neuropathy	3	1.46341	0.0236617	GRM5, LEPR, SGK1	169	14	9702	12.3018	1	0.203179	0.189152
DISGENET	C0393835~Diabetic Asymmetric Polyneuropathy	3	1.46341	0.0236617	GRM5, LEPR, SGK1	169	14	9702	12.3018	1	0.203179	0.189152
DISGENET	C0011882~Diabetic Neuropathies	3	1.46341	0.0236617	GRM5, LEPR, SGK1	169	14	9702	12.3018	1	0.203179	0.189152
DISGENET	C0007222~Cardiovascular Diseases	4	1.95122	0.0239741	SLC12A2, VCAM1, NPY, ADRB1	169	36	9702	6.3787	1	0.204636	0.190509
DISGENET	C0428908~Sinus Node Dysfunction (disorder)	3	1.46341	0.0269956	CACNB2, KCNJ8, SCN1B	169	15	9702	11.4817	1	0.229063	0.213249
DISGENET	C0006142~Malignant neoplasm of breast	28	13.6585	0.0295395	TFRC, MAOA, SEMA3A, SLC2A1, CXCR4, GRIK2, ENO1, COMT, HIF1A, SLC5A5, ROBO1, GNAI2, PLD2, CDH5, EDNRA, ERBB4, STMN1, LEPR, SLC17A6, GABRP, JUN, CADM1, GRIN2D, SLC8A3, EFNA1, DES, CXCL12, FGF10	169	1074	9702	1.49668	1	0.233938	0.217787
DISGENET	C0038870~Neuralgia, Supraorbital	3	1.46341	0.0305065	GRM5, CXCR4, PRKG1	169	16	9702	10.7641	1	0.233938	0.217787
DISGENET	C0751373~Paroxysmal Nerve Pain	3	1.46341	0.0305065	GRM5, CXCR4, PRKG1	169	16	9702	10.7641	1	0.233938	0.217787
DISGENET	C0234249~Neuralgia, Stump	3	1.46341	0.0305065	GRM5, CXCR4, PRKG1	169	16	9702	10.7641	1	0.233938	0.217787
DISGENET	C0278161~Ataxia, Motor	3	1.46341	0.0305065	GABRA1, SLC2A1, CACNA1A	169	16	9702	10.7641	1	0.233938	0.217787
DISGENET	C0240991~Ataxia, Sensory	3	1.46341	0.0305065	GABRA1, SLC2A1, CACNA1A	169	16	9702	10.7641	1	0.233938	0.217787
DISGENET	C0750937~Ataxia, Appendicular	3	1.46341	0.0305065	GABRA1, SLC2A1, CACNA1A	169	16	9702	10.7641	1	0.233938	0.217787
DISGENET	C0751372~Nerve Pain	3	1.46341	0.0305065	GRM5, CXCR4, PRKG1	169	16	9702	10.7641	1	0.233938	0.217787
DISGENET	C0042656~Neuralgia, Vidian	3	1.46341	0.0305065	GRM5, CXCR4, PRKG1	169	16	9702	10.7641	1	0.233938	0.217787
DISGENET	C0423711~Neuralgia, Perineal	3	1.46341	0.0305065	GRM5, CXCR4, PRKG1	169	16	9702	10.7641	1	0.233938	0.217787
DISGENET	C1257877~Pheochromocytoma, Extra-Adrenal	3	1.46341	0.0305065	MAOB, MAOA, COMT	169	16	9702	10.7641	1	0.233938	0.217787
DISGENET	C0234247~Neuralgia, Atypical	3	1.46341	0.0305065	GRM5, CXCR4, PRKG1	169	16	9702	10.7641	1	0.233938	0.217787
DISGENET	C0423712~Neuralgia, Iliohypogastric Nerve	3	1.46341	0.0305065	GRM5, CXCR4, PRKG1	169	16	9702	10.7641	1	0.233938	0.217787
DISGENET	C0520966~Abnormal coordination	3	1.46341	0.0305065	GABRA1, SLC2A1, CACNA1A	169	16	9702	10.7641	1	0.233938	0.217787
DISGENET	C0751371~Neuralgia, Ilioinguinal	3	1.46341	0.0305065	GRM5, CXCR4, PRKG1	169	16	9702	10.7641	1	0.233938	0.217787
DISGENET	C0750940~Tremor, Rubral	3	1.46341	0.0305065	GABRA1, SLC2A1, CACNA1A	169	16	9702	10.7641	1	0.233938	0.217787
DISGENET	C0027796~Neuralgia	3	1.46341	0.0305065	GRM5, CXCR4, PRKG1	169	16	9702	10.7641	1	0.233938	0.217787
DISGENET	C0427190~Ataxia, Truncal	3	1.46341	0.0305065	GABRA1, SLC2A1, CACNA1A	169	16	9702	10.7641	1	0.233938	0.217787
DISGENET	C0036529~Myocardial Diseases, Secondary	5	2.43902	0.0314218	ITGB1, ADCYAP1, EPO, PRKCE, ADRB2	169	69	9702	4.16002	1	0.238193	0.221749
DISGENET	C0033141~Cardiomyopathies, Primary	5	2.43902	0.0314218	ITGB1, ADCYAP1, EPO, PRKCE, ADRB2	169	69	9702	4.16002	1	0.238193	0.221749
DISGENET	C0020542~Pulmonary Hypertension	4	1.95122	0.0315598	KCNMA1, LEPR, HIF1A, PRKG1	169	40	9702	5.74083	1	0.238193	0.221749
DISGENET	C0017667~Nodular glomerulosclerosis	4	1.95122	0.0336303	PRKCE, SERPINE1, LEPR, VEGFA	169	41	9702	5.60081	1	0.248661	0.231494
DISGENET	C3887640~Astrocytosis	3	1.46341	0.0341873	ITGB1, ITGA4, LEPR	169	17	9702	10.1309	1	0.248661	0.231494
DISGENET	C0017639~Gliosis	3	1.46341	0.0341873	ITGB1, ITGA4, LEPR	169	17	9702	10.1309	1	0.248661	0.231494
DISGENET	C0042373~Vascular Diseases	3	1.46341	0.0341873	EPO, MYL9, MYLK	169	17	9702	10.1309	1	0.248661	0.231494
DISGENET	C0041948~Uremia	3	1.46341	0.0341873	VCAM1, EPO, SGK1	169	17	9702	10.1309	1	0.248661	0.231494
DISGENET	C0008677~Bronchitis, Chronic	2	0.97561	0.0343339	NPY, VEGFA	169	2	9702	57.4083	1	0.248661	0.231494
DISGENET	C0235752~Port-Wine Stain	2	0.97561	0.0343339	RASA1, GNAQ	169	2	9702	57.4083	1	0.248661	0.231494
DISGENET	C0038505~Sturge-Weber Syndrome	2	0.97561	0.0343339	RASA1, GNAQ	169	2	9702	57.4083	1	0.248661	0.231494
DISGENET	C0086133~Depressive Syndrome	4	1.95122	0.0357697	CADM1, NPY, NOS1, COMT	169	42	9702	5.46746	1	0.257758	0.239963
DISGENET	C0038433~Streptozotocin Diabetes	6	2.92683	0.0393159	NCF1, PRKCE, SERPINE1, LEPR, ATP2A2, VEGFA	169	108	9702	3.18935	1	0.279104	0.259835
DISGENET	C0011853~Diabetes Mellitus, Experimental	6	2.92683	0.0393159	NCF1, PRKCE, SERPINE1, LEPR, ATP2A2, VEGFA	169	108	9702	3.18935	1	0.279104	0.259835
DISGENET	C0002152~Alloxan Diabetes	6	2.92683	0.0393159	NCF1, PRKCE, SERPINE1, LEPR, ATP2A2, VEGFA	169	108	9702	3.18935	1	0.279104	0.259835
DISGENET	C0018798~Congenital Heart Defects	4	1.95122	0.040254	EDNRA, GNAQ, HIF1A, VEGFA	169	44	9702	5.21893	1	0.282891	0.263361
DISGENET	C0011881~Diabetic Nephropathy	4	1.95122	0.040254	PRKCE, SERPINE1, LEPR, VEGFA	169	44	9702	5.21893	1	0.282891	0.263361
DISGENET	C0236807~Amphetamine Abuse	5	2.43902	0.0408358	PDE4B, NOS1, COMT, PDYN, PRKG1	169	75	9702	3.82722	1	0.282891	0.263361
DISGENET	C0236733~Amphetamine-Related Disorders	5	2.43902	0.0408358	PDE4B, NOS1, COMT, PDYN, PRKG1	169	75	9702	3.82722	1	0.282891	0.263361
DISGENET	C0236804~Amphetamine Addiction	5	2.43902	0.0408358	PDE4B, NOS1, COMT, PDYN, PRKG1	169	75	9702	3.82722	1	0.282891	0.263361
DISGENET	C1621958~Glioblastoma Multiforme	6	2.92683	0.0434067	PRKCB, GRIK2, PIK3R1, HIF1A, MET, VEGFA	169	111	9702	3.10315	1	0.299256	0.278596
DISGENET	C0029463~Osteosarcoma	4	1.95122	0.0474862	JUN, GRM4, MET, VEGFA	169	47	9702	4.88581	1	0.325815	0.303321
DISGENET	C1863752~Enlarged Vestibular Aqueduct	2	0.97561	0.0510589	KCNJ10, SLC26A4	169	3	9702	38.2722	1	0.34537	0.321526
DISGENET	C3538946~DEAFNESS, AUTOSOMAL RECESSIVE 4, WITH ENLARGED VESTIBULAR AQUEDUCT	2	0.97561	0.0510589	KCNJ10, SLC26A4	169	3	9702	38.2722	1	0.34537	0.321526
DISGENET	C0271829~Pendred's syndrome	2	0.97561	0.0510589	KCNJ10, SLC26A4	169	3	9702	38.2722	1	0.34537	0.321526
DISGENET	C0018800~Cardiomegaly	5	2.43902	0.053632	ROCK2, PRKCB, ATP2A2, HIF1A, PLD2	169	82	9702	3.50051	1	0.359384	0.334573
DISGENET	C1383860~Cardiac Hypertrophy	5	2.43902	0.053632	ROCK2, PRKCB, ATP2A2, HIF1A, PLD2	169	82	9702	3.50051	1	0.359384	0.334573
DISGENET	C0041671~Attention Deficit Disorder	3	1.46341	0.0549054	GRM5, COMT, GRM1	169	22	9702	7.8284	1	0.364511	0.339346
DISGENET	C1321905~Minimal Brain Dysfunction	3	1.46341	0.0549054	GRM5, COMT, GRM1	169	22	9702	7.8284	1	0.364511	0.339346
DISGENET	C0027746~Nerve Degeneration	5	2.43902	0.0556187	GRM4, EPO, SLC1A1, NOS1, GRIN2D	169	83	9702	3.45833	1	0.367545	0.34217
DISGENET	C1708353~Hereditary Paraganglioma-Pheochromocytoma Syndrome	3	1.46341	0.0594677	EGLN1, EGLN2, MET	169	23	9702	7.48804	1	0.391177	0.364171
DISGENET	C0269102~Endometrioma	7	3.41463	0.0608226	ITGB1, NRP1, MAOB, MAOA, SST, GPX3, SLC1A1	169	161	9702	2.49601	1	0.396453	0.369083
DISGENET	C0014175~Endometriosis	7	3.41463	0.0608226	ITGB1, NRP1, MAOB, MAOA, SST, GPX3, SLC1A1	169	161	9702	2.49601	1	0.396453	0.369083
DISGENET	C0027765~nervous system disorder	4	1.95122	0.0637102	SERPINE1, SLC2A1, ADRB2, NOS1	169	53	9702	4.3327	1	0.41071	0.382355
DISGENET	C0017638~Glioma	5	2.43902	0.0639576	TFRC, STMN1, PIK3R1, SLC5A5, MYLK	169	87	9702	3.29933	1	0.41071	0.382355
DISGENET	C0178417~Anhedonia	3	1.46341	0.0641555	SLC17A7, CACNA1C, COMT	169	24	9702	7.17604	1	0.41071	0.382355
DISGENET	C1263846~Attention deficit hyperactivity disorder	3	1.46341	0.0641555	GRM5, COMT, GRM1	169	24	9702	7.17604	1	0.41071	0.382355
DISGENET	C4721453~Peripheral Nervous System Diseases	4	1.95122	0.0666337	JUN, NPY, PRKCE, CACNA1B	169	54	9702	4.25247	1	0.42266	0.39348
DISGENET	C0392156~Akathisia	2	0.97561	0.0674958	ADCYAP1, CACNA1C	169	4	9702	28.7041	1	0.42266	0.39348
DISGENET	C2936476~Chronic Liver Failure	2	0.97561	0.0674958	MAOA, NOS1	169	4	9702	28.7041	1	0.42266	0.39348
DISGENET	C0745744~End Stage Liver Disease	2	0.97561	0.0674958	MAOA, NOS1	169	4	9702	28.7041	1	0.42266	0.39348
DISGENET	C3887612~Psychomotor Agitation	2	0.97561	0.0674958	ADCYAP1, CACNA1C	169	4	9702	28.7041	1	0.42266	0.39348
DISGENET	C0004134~Ataxia	3	1.46341	0.0689632	GABRA1, SLC2A1, CACNA1A	169	25	9702	6.88899	1	0.424435	0.395133
DISGENET	C1571983~Involutional paraphrenia	3	1.46341	0.0689632	GAD1, GAD2, CACNA1C	169	25	9702	6.88899	1	0.424435	0.395133
DISGENET	C1571984~Psychosis, Involutional	3	1.46341	0.0689632	GAD1, GAD2, CACNA1C	169	25	9702	6.88899	1	0.424435	0.395133
DISGENET	C0011574~Involutional Depression	3	1.46341	0.0689632	GAD1, GAD2, CACNA1C	169	25	9702	6.88899	1	0.424435	0.395133
DISGENET	C0006826~Malignant Neoplasms	6	2.92683	0.0712784	SST, GPX3, PIK3R1, MET, SLC5A5, VEGFA	169	128	9702	2.69101	1	0.436809	0.406653
DISGENET	C0878544~Cardiomyopathies	6	2.92683	0.0750806	ITGB1, ADCYAP1, DES, EPO, PRKCE, ADRB2	169	130	9702	2.64961	1	0.458151	0.426522
DISGENET	C0557874~Global developmental delay	6	2.92683	0.0809871	NTNG2, GLRA1, GABRA5, SLC2A1, CACNA1B, CACNA1E	169	133	9702	2.58985	1	0.483685	0.450292
DISGENET	C0003873~Rheumatoid Arthritis	7	3.41463	0.0817481	NCF1, CALD1, KIF5A, CXCR4, PRKCQ, ENO1, VEGFA	169	174	9702	2.30953	1	0.483685	0.450292
DISGENET	C0027627~Neoplasm Metastasis	8	3.90244	0.0828669	ITGB1, CXCL12, EPO, CXCR4, EZR, MET, MYLK, VEGFA	169	217	9702	2.11643	1	0.483685	0.450292
DISGENET	C0919267~ovarian neoplasm	6	2.92683	0.0830098	EDNRA, SLC2A1, GRIK2, PIK3R1, MET, SLC5A5	169	134	9702	2.57052	1	0.483685	0.450292
DISGENET	C0752306~Anoxia-Ischemia, Brain	2	0.97561	0.0836498	HIF1A, VEGFA	169	5	9702	22.9633	1	0.483685	0.450292
DISGENET	C0752307~Anoxia-Ischemia, Cerebral	2	0.97561	0.0836498	HIF1A, VEGFA	169	5	9702	22.9633	1	0.483685	0.450292
DISGENET	C0178540~Cerebral Hypoxia-Ischemia	2	0.97561	0.0836498	HIF1A, VEGFA	169	5	9702	22.9633	1	0.483685	0.450292
DISGENET	C0752308~Hypoxia-Ischemia, Brain	2	0.97561	0.0836498	HIF1A, VEGFA	169	5	9702	22.9633	1	0.483685	0.450292
DISGENET	C1332347~Atypical Ductal Breast Hyperplasia	2	0.97561	0.0836498	SLC2A1, HIF1A	169	5	9702	22.9633	1	0.483685	0.450292
DISGENET	C2063866~Depressive Disorder, Treatment-Resistant	2	0.97561	0.0836498	MAOA, VEGFA	169	5	9702	22.9633	1	0.483685	0.450292
DISGENET	C0752304~Hypoxic-Ischemic Encephalopathy	2	0.97561	0.0836498	HIF1A, VEGFA	169	5	9702	22.9633	1	0.483685	0.450292
DISGENET	C0752305~Anoxic-Ischemic Encephalopathy	2	0.97561	0.0836498	HIF1A, VEGFA	169	5	9702	22.9633	1	0.483685	0.450292
DISGENET	C0007124~Noninfiltrating Intraductal Carcinoma	2	0.97561	0.0836498	SLC2A1, HIF1A	169	5	9702	22.9633	1	0.483685	0.450292
DISGENET	C1319315~Adenocarcinoma of large intestine	5	2.43902	0.0849595	ERBB4, PRKCB, PRKCQ, PIK3R1, MET	169	96	9702	2.99001	1	0.487982	0.454293
DISGENET	C0920563~Insulin Sensitivity	4	1.95122	0.0854138	GPX3, LEPR, ADRB2, PIK3R1	169	60	9702	3.82722	1	0.487982	0.454293
DISGENET	C0021655~Insulin Resistance	4	1.95122	0.0854138	GPX3, LEPR, ADRB2, PIK3R1	169	60	9702	3.82722	1	0.487982	0.454293
DISGENET	C1140680~Malignant neoplasm of ovary	6	2.92683	0.0892376	EDNRA, SLC2A1, GRIK2, PIK3R1, MET, SLC5A5	169	137	9702	2.51423	1	0.506069	0.471131
DISGENET	C0026650~Movement Disorders	3	1.46341	0.0892855	SLC12A2, CACNA1B, PDYN	169	29	9702	5.93879	1	0.506069	0.471131
DISGENET	C0007621~Neoplastic Cell Transformation	6	2.92683	0.0935213	JUN, NCF1, TFRC, SLC2A1, CXCR4, HIF1A	169	139	9702	2.47806	1	0.52799	0.491539
DISGENET	C0024809~Marijuana Abuse	3	1.46341	0.0946133	NCAM1, COMT, PDYN	169	30	9702	5.74083	1	0.532061	0.495329
DISGENET	C0002395~Alzheimer's Disease	5	2.43902	0.0979117	MAOB, NPY, UNC5C, ENO1, VEGFA	169	101	9702	2.84199	1	0.548458	0.510594
DISGENET	C1838604~EPILEPSY, CHILDHOOD ABSENCE, 1	2	0.97561	0.0995255	GABRA1, SLC2A1	169	6	9702	19.1361	1	0.553177	0.514987
DISGENET	C2362914~clinical depression	2	0.97561	0.0995255	MAOA, NPY	169	6	9702	19.1361	1	0.553177	0.514987

## Sheet: Gill KEGG
Category	Term	Count	%	p-value	Genes	List Total	Pop Hits	Pop Total	Fold Enrichment	Bonferroni	Benjamini	FDR
DISGENET	C2239176~Liver carcinoma	18	18.9474	3.98231e-07	PLK1, SLC2A1, TTK, ENO1, EGFR, CDC20, CCNB1, PKM, CXCL12, PTTG1, MYC, CYP1A1, PGK1, CDK1, PPARG, GLUL, MCM2, MAD2L1	79	507	9702	4.36012	0.00031734	0.00031739	0.000307833
DISGENET	C0017919~Glycogen Storage Disease	6	6.31579	2.07396e-06	LDHA, PFKL, PGK1, PYGM, ALDOA, PGM1	79	27	9702	27.2911	0.00165158	0.000826472	0.000801584
DISGENET	C0027626~Neoplasm Invasiveness	9	9.47368	0.000108533	PKM, CXCL12, ZBTB16, MAPK1, ACO1, ENO1, ALDOA, HIF1A, EGFR	79	184	9702	6.00702	0.0828693	0.0288335	0.0279653
DISGENET	C0009375~Colonic Neoplasms	8	8.42105	0.000210168	PCNA, MYC, ODC1, SLC2A1, PPARG, EGFR, MCM2, VEGFA	79	152	9702	6.46369	0.154242	0.041876	0.040615
DISGENET	C0007102~Malignant tumor of colon	8	8.42105	0.000277128	PCNA, MYC, ODC1, SLC2A1, PPARG, EGFR, MCM2, VEGFA	79	159	9702	6.17913	0.198205	0.0441743	0.0428441
DISGENET	C0030297~Pancreatic Neoplasm	6	6.31579	0.00122506	LDHA, MYC, PPARG, HIF1A, EGFR, ABO	79	100	9702	7.36861	0.623549	0.11445	0.111004
DISGENET	C0346647~Malignant neoplasm of pancreas	6	6.31579	0.00133852	LDHA, MYC, PPARG, HIF1A, EGFR, ABO	79	102	9702	7.22413	0.656137	0.11445	0.111004
DISGENET	C0007131~Non-Small Cell Lung Carcinoma	7	7.36842	0.0015538	MYC, MDM2, ENO1, HIF1A, EGFR, FGFR2, VEGFA	79	156	9702	5.51071	0.710425	0.11445	0.111004
DISGENET	C0525045~Mood Disorders	7	7.36842	0.00226252	LDHA, PFKL, PPARG, GLUL, HIF1A, ABO, VEGFA	79	168	9702	5.11709	0.83557	0.11445	0.111004
DISGENET	C0018671~Head and Neck Neoplasms	4	4.21053	0.00229291	MAPK1, EGFR, FGFR2, VEGFA	79	33	9702	14.8861	0.839514	0.11445	0.111004
DISGENET	C0205645~Adenocarcinoma, Tubular	6	6.31579	0.00236246	PCNA, MYC, PPARG, ENO1, EGFR, VEGFA	79	116	9702	6.35225	0.848187	0.11445	0.111004
DISGENET	C0205644~Carcinoma, Granular Cell	6	6.31579	0.00236246	PCNA, MYC, PPARG, ENO1, EGFR, VEGFA	79	116	9702	6.35225	0.848187	0.11445	0.111004
DISGENET	C0205641~Adenocarcinoma, Basal Cell	6	6.31579	0.00236246	PCNA, MYC, PPARG, ENO1, EGFR, VEGFA	79	116	9702	6.35225	0.848187	0.11445	0.111004
DISGENET	C0205643~Carcinoma, Cribriform	6	6.31579	0.00236246	PCNA, MYC, PPARG, ENO1, EGFR, VEGFA	79	116	9702	6.35225	0.848187	0.11445	0.111004
DISGENET	C0205642~Adenocarcinoma, Oxyphilic	6	6.31579	0.00236246	PCNA, MYC, PPARG, ENO1, EGFR, VEGFA	79	116	9702	6.35225	0.848187	0.11445	0.111004
DISGENET	C0001418~Adenocarcinoma	6	6.31579	0.00236246	PCNA, MYC, PPARG, ENO1, EGFR, VEGFA	79	116	9702	6.35225	0.848187	0.11445	0.111004
DISGENET	C0038356~Stomach Neoplasms	9	9.47368	0.0025642	MYC, MAPK1, PPARG, ALDOB, ENO1, POLE, SLC16A3, EGFR, FGFR2	79	297	9702	3.72152	0.870787	0.11445	0.111004
DISGENET	C0476089~Endometrial Carcinoma	5	5.26316	0.00262952	MYC, POLE, EGFR, FGFR2, VEGFA	79	72	9702	8.52848	0.877359	0.11445	0.111004
DISGENET	C0024623~Malignant neoplasm of stomach	9	9.47368	0.00272843	MYC, MAPK1, PPARG, ALDOB, ENO1, POLE, SLC16A3, EGFR, FGFR2	79	300	9702	3.6843	0.886679	0.11445	0.111004
DISGENET	C0007137~Squamous cell carcinoma	6	6.31579	0.00315553	TPI1, MYC, MAPK1, ENO1, EGFR, VEGFA	79	124	9702	5.94243	0.919454	0.121306	0.117654
DISGENET	C0520572~Enzymopathy	3	3.15789	0.00334848	TPI1, ENO1, ALDOA	79	11	9702	33.4937	0.93097	0.121306	0.117654
DISGENET	C1176475~Ductal Carcinoma	3	3.15789	0.00334848	MYC, SLC2A1, HIF1A	79	11	9702	33.4937	0.93097	0.121306	0.117654
DISGENET	C0334588~Giant Cell Glioblastoma	5	5.26316	0.00458694	MYC, PPARG, HIF1A, EGFR, VEGFA	79	84	9702	7.31013	0.974375	0.158947	0.154161
DISGENET	C0278996~Malignant Head and Neck Neoplasm	4	4.21053	0.00522462	MAPK1, EGFR, FGFR2, VEGFA	79	44	9702	11.1646	0.984624	0.173501	0.168276
DISGENET	C0152013~Adenocarcinoma of lung (disorder)	7	7.36842	0.00615288	LDHA, TPI1, MYC, ENO1, ALDOA, EGFR, FGFR2	79	206	9702	4.17316	0.992693	0.192735	0.186932
DISGENET	C0029463~Osteosarcoma	4	4.21053	0.00628748	CCNB3, MYC, EGFR, VEGFA	79	47	9702	10.4519	0.993441	0.192735	0.186932
DISGENET	C0279626~Squamous cell carcinoma of esophagus	5	5.26316	0.00708287	CYP26B1, TPI1, HIF1A, EGFR, MAD2L1	79	95	9702	6.46369	0.996535	0.202613	0.196512
DISGENET	C0206726~gliosarcoma	3	3.15789	0.00711816	PPARG, EGFR, VEGFA	79	16	9702	23.0269	0.996632	0.202613	0.196512
DISGENET	C0027627~Neoplasm Metastasis	7	7.36842	0.00787372	CXCL12, MYC, AGTR1, MAPK1, ALDOA, EGFR, VEGFA	79	217	9702	3.96162	0.998164	0.216391	0.209875
DISGENET	C1168401~Squamous cell carcinoma of the head and neck	4	4.21053	0.00832739	CCNA2, CCNB1, CDK2, EGFR	79	52	9702	9.44693	0.998725	0.218289	0.211715
DISGENET	C0007103~Malignant neoplasm of endometrium	3	3.15789	0.00898189	POLE, EGFR, FGFR2	79	18	9702	20.4684	0.999247	0.218289	0.211715
DISGENET	C0346191~Carcinoma in situ of endometrium	3	3.15789	0.00898189	POLE, EGFR, FGFR2	79	18	9702	20.4684	0.999247	0.218289	0.211715
DISGENET	C1708349~Hereditary Diffuse Gastric Cancer	8	8.42105	0.0090383	MYC, MAPK1, PPARG, ALDOB, ENO1, SLC16A3, EGFR, FGFR2	79	293	9702	3.35318	0.99928	0.218289	0.211715
DISGENET	C0030246~Pustulosis of Palms and Soles	4	4.21053	0.0107144	PCNA, PTTG1, PPARG, VEGFA	79	57	9702	8.61825	0.999813	0.243983	0.236636
DISGENET	C0033860~Psoriasis	4	4.21053	0.0107144	PCNA, PTTG1, PPARG, VEGFA	79	57	9702	8.61825	0.999813	0.243983	0.236636
DISGENET	C0007112~Adenocarcinoma of prostate	3	3.15789	0.0110389	MYC, EGFR, MAD1L1	79	20	9702	18.4215	0.999856	0.244389	0.237029
DISGENET	C1621958~Glioblastoma Multiforme	5	5.26316	0.0121036	MYC, CDK2, HIF1A, EGFR, VEGFA	79	111	9702	5.53199	0.999939	0.256657	0.248929
DISGENET	C0029459~Osteoporosis, Senile	4	4.21053	0.0128812	PKM, PNP, TPI1, ENO1	79	61	9702	8.05312	0.999967	0.256657	0.248929
DISGENET	C0001787~Osteoporosis, Age-Related	4	4.21053	0.0128812	PKM, PNP, TPI1, ENO1	79	61	9702	8.05312	0.999967	0.256657	0.248929
DISGENET	C0751406~Post-Traumatic Osteoporosis	4	4.21053	0.0128812	PKM, PNP, TPI1, ENO1	79	61	9702	8.05312	0.999967	0.256657	0.248929
DISGENET	C0029456~Osteoporosis	4	4.21053	0.0140517	PKM, PNP, TPI1, ENO1	79	63	9702	7.79747	0.999987	0.273151	0.264926
DISGENET	C0751177~Cancer of Head	3	3.15789	0.0157068	MAPK1, EGFR, VEGFA	79	24	9702	15.3513	0.999997	0.284507	0.27594
DISGENET	C0887900~Upper Aerodigestive Tract Neoplasms	3	3.15789	0.0157068	MAPK1, EGFR, VEGFA	79	24	9702	15.3513	0.999997	0.284507	0.27594
DISGENET	C0018675~Head Neoplasms	3	3.15789	0.0157068	MAPK1, EGFR, VEGFA	79	24	9702	15.3513	0.999997	0.284507	0.27594
DISGENET	C0011570~Mental Depression	7	7.36842	0.0162148	LDHA, PDE4D, PDE4B, GLUL, HIF1A, FGFR2, VEGFA	79	254	9702	3.38453	0.999998	0.287183	0.278535
DISGENET	C0746787~Cancer of Neck	3	3.15789	0.0169846	MAPK1, EGFR, VEGFA	79	25	9702	14.7372	0.999999	0.288015	0.279342
DISGENET	C0027533~Neck Neoplasms	3	3.15789	0.0169846	MAPK1, EGFR, VEGFA	79	25	9702	14.7372	0.999999	0.288015	0.279342
DISGENET	C0006826~Malignant Neoplasms	5	5.26316	0.0194741	MYC, MDM2, NT5C2, EGFR, VEGFA	79	128	9702	4.79727	1	0.323351	0.313614
DISGENET	C0022116~Ischemia	3	3.15789	0.0210717	CXCL12, PCNA, PPARG	79	28	9702	13.1582	1	0.342737	0.332416
DISGENET	C0009404~Colorectal Neoplasms	7	7.36842	0.0237352	FEN1, MYC, ODC1, PPARG, POLE, EGFR, PGM1	79	277	9702	3.10351	1	0.363606	0.352657
DISGENET	C4704874~Mammary Carcinoma, Human	10	10.5263	0.024415	CXCL12, MDM2, SLC2A1, CYP1A1, ENO1, ALDOA, HIF1A, SLC16A3, EGFR, FGFR2	79	525	9702	2.33924	1	0.363606	0.352657
DISGENET	C1257931~Mammary Neoplasms, Human	10	10.5263	0.024415	CXCL12, MDM2, SLC2A1, CYP1A1, ENO1, ALDOA, HIF1A, SLC16A3, EGFR, FGFR2	79	525	9702	2.33924	1	0.363606	0.352657
DISGENET	C1458155~Mammary Neoplasms	10	10.5263	0.0249487	CXCL12, MDM2, SLC2A1, CYP1A1, ENO1, ALDOA, HIF1A, SLC16A3, EGFR, FGFR2	79	527	9702	2.33036	1	0.363606	0.352657
DISGENET	C0376358~Malignant neoplasm of prostate	11	11.5789	0.0251222	CXCL12, MYC, PDE4D, ZBTB16, MDM2, CYP1A1, HIF1A, EGFR, MAD1L1, ABO, VEGFA	79	616	9702	2.19304	1	0.363606	0.352657
DISGENET	C0033578~Prostatic Neoplasms	11	11.5789	0.0251222	CXCL12, MYC, PDE4D, ZBTB16, MDM2, CYP1A1, HIF1A, EGFR, MAD1L1, ABO, VEGFA	79	616	9702	2.19304	1	0.363606	0.352657
DISGENET	C0017636~Glioblastoma	4	4.21053	0.0255482	MYC, HIF1A, EGFR, VEGFA	79	79	9702	6.21823	1	0.363606	0.352657
DISGENET	C0149782~Squamous cell carcinoma of lung	3	3.15789	0.0270857	PLK1, EGFR, FGFR2	79	32	9702	11.5134	1	0.374505	0.363227
DISGENET	C0008925~Cleft Palate	4	4.21053	0.0272538	TGFB3, MYC, PGM1, FGFR2	79	81	9702	6.0647	1	0.374505	0.363227
DISGENET	C0678222~Breast Carcinoma	10	10.5263	0.0280346	CXCL12, MDM2, SLC2A1, CYP1A1, ENO1, ALDOA, HIF1A, SLC16A3, EGFR, FGFR2	79	538	9702	2.28272	1	0.378705	0.367301
DISGENET	C4048328~cervical cancer	3	3.15789	0.0303217	MYC, EGFR, VEGFA	79	34	9702	10.8362	1	0.402774	0.390645
DISGENET	C1153706~Endometrial adenocarcinoma	2	2.10526	0.0317774	EGFR, FGFR2	79	4	9702	61.4051	1	0.404758	0.392569
DISGENET	C0151468~Thyroid Gland Follicular Adenoma	3	3.15789	0.0319946	NCOA4, PPARG, HIF1A	79	35	9702	10.5266	1	0.404758	0.392569
DISGENET	C0007873~Uterine Cervical Neoplasm	3	3.15789	0.0319946	MYC, EGFR, VEGFA	79	35	9702	10.5266	1	0.404758	0.392569
DISGENET	C0040136~Thyroid Neoplasm	3	3.15789	0.0354467	NCOA4, PPARG, HIF1A	79	37	9702	9.95758	1	0.414619	0.402133
DISGENET	C0153633~Malignant neoplasm of brain	3	3.15789	0.0372246	PCNA, EGFR, VEGFA	79	38	9702	9.69554	1	0.414619	0.402133
DISGENET	C0086743~Osteoarthrosis Deformans	4	4.21053	0.0387322	SLC2A1, ACO1, PPARG, ENO1	79	93	9702	5.28216	1	0.414619	0.402133
DISGENET	C0029408~Degenerative polyarthritis	4	4.21053	0.0387322	SLC2A1, ACO1, PPARG, ENO1	79	93	9702	5.28216	1	0.414619	0.402133
DISGENET	C0006118~Brain Neoplasms	3	3.15789	0.0390362	PCNA, EGFR, VEGFA	79	39	9702	9.44693	1	0.414619	0.402133
DISGENET	C0178540~Cerebral Hypoxia-Ischemia	2	2.10526	0.0395648	HIF1A, VEGFA	79	5	9702	49.1241	1	0.414619	0.402133
DISGENET	C1332347~Atypical Ductal Breast Hyperplasia	2	2.10526	0.0395648	SLC2A1, HIF1A	79	5	9702	49.1241	1	0.414619	0.402133
DISGENET	C0752305~Anoxic-Ischemic Encephalopathy	2	2.10526	0.0395648	HIF1A, VEGFA	79	5	9702	49.1241	1	0.414619	0.402133
DISGENET	C0752306~Anoxia-Ischemia, Brain	2	2.10526	0.0395648	HIF1A, VEGFA	79	5	9702	49.1241	1	0.414619	0.402133
DISGENET	C0752307~Anoxia-Ischemia, Cerebral	2	2.10526	0.0395648	HIF1A, VEGFA	79	5	9702	49.1241	1	0.414619	0.402133
DISGENET	C0007124~Noninfiltrating Intraductal Carcinoma	2	2.10526	0.0395648	SLC2A1, HIF1A	79	5	9702	49.1241	1	0.414619	0.402133
DISGENET	C0752304~Hypoxic-Ischemic Encephalopathy	2	2.10526	0.0395648	HIF1A, VEGFA	79	5	9702	49.1241	1	0.414619	0.402133
DISGENET	C0752308~Hypoxia-Ischemia, Brain	2	2.10526	0.0395648	HIF1A, VEGFA	79	5	9702	49.1241	1	0.414619	0.402133
DISGENET	C0205698~Undifferentiated carcinoma	5	5.26316	0.042015	PKM, MYC, ENO1, HIF1A, EGFR	79	163	9702	3.76718	1	0.414619	0.402133
DISGENET	C0205699~Carcinomatosis	5	5.26316	0.042015	PKM, MYC, ENO1, HIF1A, EGFR	79	163	9702	3.76718	1	0.414619	0.402133
DISGENET	C0205697~Carcinoma, Spindle-Cell	5	5.26316	0.042015	PKM, MYC, ENO1, HIF1A, EGFR	79	163	9702	3.76718	1	0.414619	0.402133
DISGENET	C0205696~Anaplastic carcinoma	5	5.26316	0.042015	PKM, MYC, ENO1, HIF1A, EGFR	79	163	9702	3.76718	1	0.414619	0.402133
DISGENET	C0007097~Carcinoma	5	5.26316	0.0428111	PKM, MYC, ENO1, HIF1A, EGFR	79	164	9702	3.74421	1	0.414619	0.402133
DISGENET	C1837218~Cleft palate, isolated	3	3.15789	0.0446667	TGFB3, MYC, FGFR2	79	42	9702	8.77215	1	0.414619	0.402133
DISGENET	C0546126~Acute Confusional Senile Dementia	4	4.21053	0.0452595	TPI1, PPARG, ENO1, VEGFA	79	99	9702	4.96203	1	0.414619	0.402133
DISGENET	C0011265~Presenile dementia	4	4.21053	0.0452595	TPI1, PPARG, ENO1, VEGFA	79	99	9702	4.96203	1	0.414619	0.402133
DISGENET	C0750901~Alzheimer Disease, Early Onset	4	4.21053	0.0452595	TPI1, PPARG, ENO1, VEGFA	79	99	9702	4.96203	1	0.414619	0.402133
DISGENET	C0494463~Alzheimer Disease, Late Onset	4	4.21053	0.0452595	TPI1, PPARG, ENO1, VEGFA	79	99	9702	4.96203	1	0.414619	0.402133
DISGENET	C0750900~Alzheimer's Disease, Focal Onset	4	4.21053	0.0452595	TPI1, PPARG, ENO1, VEGFA	79	99	9702	4.96203	1	0.414619	0.402133
DISGENET	C0276496~Familial Alzheimer Disease (FAD)	4	4.21053	0.0463974	TPI1, PPARG, ENO1, VEGFA	79	100	9702	4.91241	1	0.420213	0.407559
DISGENET	C0002395~Alzheimer's Disease	4	4.21053	0.0475496	TPI1, PPARG, ENO1, VEGFA	79	101	9702	4.86377	1	0.425809	0.412987
DISGENET	C0549473~Thyroid carcinoma	3	3.15789	0.0485773	NCOA4, PPARG, HIF1A	79	44	9702	8.37342	1	0.430179	0.417225
DISGENET	C0151744~Myocardial Ischemia	5	5.26316	0.0530301	PDE4B, COX5B, ALDOA, PGM1, VEGFA	79	176	9702	3.48892	1	0.461983	0.448071
DISGENET	C2751306~Polycystic kidney disease, type 2	2	2.10526	0.0549544	MYC, PPARG	79	7	9702	35.0886	1	0.461983	0.448071
DISGENET	C0917731~Male sterility	3	3.15789	0.0567533	MDM2, CYP1A1, ENO1	79	48	9702	7.67563	1	0.461983	0.448071
DISGENET	C0021364~Male infertility	3	3.15789	0.0567533	MDM2, CYP1A1, ENO1	79	48	9702	7.67563	1	0.461983	0.448071
DISGENET	C0848676~Subfertility, Male	3	3.15789	0.0567533	MDM2, CYP1A1, ENO1	79	48	9702	7.67563	1	0.461983	0.448071
DISGENET	C0023212~Left-Sided Heart Failure	4	4.21053	0.0585449	AGTR1, PPARG, HIF1A, VEGFA	79	110	9702	4.46582	1	0.461983	0.448071
DISGENET	C0018802~Congestive heart failure	4	4.21053	0.0585449	AGTR1, PPARG, HIF1A, VEGFA	79	110	9702	4.46582	1	0.461983	0.448071
DISGENET	C1959583~Myocardial Failure	4	4.21053	0.0585449	AGTR1, PPARG, HIF1A, VEGFA	79	110	9702	4.46582	1	0.461983	0.448071
DISGENET	C1961112~Heart Decompensation	4	4.21053	0.0585449	AGTR1, PPARG, HIF1A, VEGFA	79	110	9702	4.46582	1	0.461983	0.448071
DISGENET	C0018801~Heart failure	4	4.21053	0.0585449	AGTR1, PPARG, HIF1A, VEGFA	79	110	9702	4.46582	1	0.461983	0.448071
DISGENET	C0235527~Heart Failure, Right-Sided	4	4.21053	0.0585449	AGTR1, PPARG, HIF1A, VEGFA	79	110	9702	4.46582	1	0.461983	0.448071
DISGENET	C0024121~Lung Neoplasms	6	6.31579	0.0617843	FEN1, PCNA, MYC, MAPK1, EGFR, FGFR2	79	265	9702	2.78061	1	0.479631	0.465188
DISGENET	C0887850~Polycystic Kidney, Type 1 Autosomal Dominant Disease	2	2.10526	0.0625576	MYC, PPARG	79	8	9702	30.7025	1	0.479631	0.465188
DISGENET	C0242379~Malignant neoplasm of lung	6	6.31579	0.0625868	FEN1, PCNA, MYC, MAPK1, EGFR, FGFR2	79	266	9702	2.77015	1	0.479631	0.465188
DISGENET	C0085413~Polycystic Kidney, Autosomal Dominant	2	2.10526	0.0701005	MYC, PPARG	79	9	9702	27.2911	1	0.527076	0.511204
DISGENET	C4551637~Erythrocytosis familial, 1	2	2.10526	0.0701005	EGLN2, HIF1A	79	9	9702	27.2911	1	0.527076	0.511204
DISGENET	C0079744~Diffuse Large B-Cell Lymphoma	3	3.15789	0.0721037	MYC, CDK2, CDK1	79	55	9702	6.69873	1	0.537072	0.520899
DISGENET	C3887461~Head and Neck Carcinoma	2	2.10526	0.0775834	EGFR, FGFR2	79	10	9702	24.562	1	0.572537	0.555296
DISGENET	C0014170~Endometrial Neoplasms	3	3.15789	0.0790503	MYC, FGFR2, VEGFA	79	58	9702	6.35225	1	0.57801	0.560605
DISGENET	C0037286~Skin Neoplasms	3	3.15789	0.0814111	ODC1, POLE, HIF1A	79	59	9702	6.24458	1	0.584546	0.566944
DISGENET	C0007114~Malignant neoplasm of skin	3	3.15789	0.0814111	ODC1, POLE, HIF1A	79	59	9702	6.24458	1	0.584546	0.566944
DISGENET	C0342257~Complications of Diabetes Mellitus	2	2.10526	0.0850069	HIF1A, VEGFA	79	11	9702	22.3291	1	0.599562	0.581507
DISGENET	C0011884~Diabetic Retinopathy	2	2.10526	0.0850069	AGTR1, VEGFA	79	11	9702	22.3291	1	0.599562	0.581507
DISGENET	C0005586~Bipolar Disorder	8	8.42105	0.0881171	LDHA, PFKL, PDE10A, PDE4B, MAPK1, HIF1A, FGFR2, VEGFA	79	477	9702	2.05971	1	0.616047	0.597496
DISGENET	C0030354~Papilloma	2	2.10526	0.0923714	ODC1, EGFR	79	12	9702	20.4684	1	0.628373	0.609451
DISGENET	C0205874~Papilloma, Squamous Cell	2	2.10526	0.0923714	ODC1, EGFR	79	12	9702	20.4684	1	0.628373	0.609451
DISGENET	C0205875~Papillomatosis	2	2.10526	0.0923714	ODC1, EGFR	79	12	9702	20.4684	1	0.628373	0.609451
DISGENET	C0919267~ovarian neoplasm	4	4.21053	0.0930339	MYC, SLC2A1, MAPK1, EGFR	79	134	9702	3.66597	1	0.628373	0.609451
DISGENET	C0010054~Coronary Arteriosclerosis	3	3.15789	0.0960159	CXCL12, ABO, VEGFA	79	65	9702	5.66816	1	0.637705	0.618502
DISGENET	C1956346~Coronary Artery Disease	3	3.15789	0.0960159	CXCL12, ABO, VEGFA	79	65	9702	5.66816	1	0.637705	0.618502
DISGENET	C1140680~Malignant neoplasm of ovary	4	4.21053	0.0978311	MYC, SLC2A1, MAPK1, EGFR	79	137	9702	3.5857	1	0.643603	0.624222
DISGENET	C0027659~Neoplasms, Experimental	3	3.15789	0.0985189	PCNA, HIF1A, VEGFA	79	66	9702	5.58228	1	0.643603	0.624222

## Sheet: HK KEGG
Category	Term	Count	%	p-value	Genes	List Total	Pop Hits	Pop Total	Fold Enrichment	Bonferroni	Benjamini	FDR
DISGENET	C2239176~Liver carcinoma	14	20	3.56817e-06	JUN, CDKN1B, HGF, SLC2A1, IRS2, ENO1, HMGCR, GYS2, PKM, SCD, PGK1, PCK1, FDFT1, BCL2L1	56	507	9702	4.78402	0.00305682	0.00306149	0.0029259
DISGENET	C0017919~Glycogen Storage Disease	5	7.14286	1.47254e-05	GYS2, GYS1, LDHA, PGK1, ALDOA	56	27	9702	32.0833	0.012555	0.00631719	0.00603741
DISGENET	C1257931~Mammary Neoplasms, Human	12	17.1429	0.000142819	GPI, HSP90AA1, JUN, CDKN1B, NOS2, MDM2, SLC2A1, KDR, MTHFR, ENO1, ALDOA, HIF1A	56	525	9702	3.96	0.115336	0.0114865	0.0109778
DISGENET	C4704874~Mammary Carcinoma, Human	12	17.1429	0.000142819	GPI, HSP90AA1, JUN, CDKN1B, NOS2, MDM2, SLC2A1, KDR, MTHFR, ENO1, ALDOA, HIF1A	56	525	9702	3.96	0.115336	0.0114865	0.0109778
DISGENET	C1458155~Mammary Neoplasms	12	17.1429	0.000147703	GPI, HSP90AA1, JUN, CDKN1B, NOS2, MDM2, SLC2A1, KDR, MTHFR, ENO1, ALDOA, HIF1A	56	527	9702	3.94497	0.119036	0.0114865	0.0109778
DISGENET	C0678222~Breast Carcinoma	12	17.1429	0.000177197	GPI, HSP90AA1, JUN, CDKN1B, NOS2, MDM2, SLC2A1, KDR, MTHFR, ENO1, ALDOA, HIF1A	56	538	9702	3.86431	0.141054	0.0114865	0.0109778
DISGENET	C0546126~Acute Confusional Senile Dementia	6	8.57143	0.000232128	INSR, GAPDHS, MTHFR, DHCR24, ENO1, VEGFA	56	99	9702	10.5	0.180605	0.0114865	0.0109778
DISGENET	C0750901~Alzheimer Disease, Early Onset	6	8.57143	0.000232128	INSR, GAPDHS, MTHFR, DHCR24, ENO1, VEGFA	56	99	9702	10.5	0.180605	0.0114865	0.0109778
DISGENET	C0011265~Presenile dementia	6	8.57143	0.000232128	INSR, GAPDHS, MTHFR, DHCR24, ENO1, VEGFA	56	99	9702	10.5	0.180605	0.0114865	0.0109778
DISGENET	C0750900~Alzheimer's Disease, Focal Onset	6	8.57143	0.000232128	INSR, GAPDHS, MTHFR, DHCR24, ENO1, VEGFA	56	99	9702	10.5	0.180605	0.0114865	0.0109778
DISGENET	C0494463~Alzheimer Disease, Late Onset	6	8.57143	0.000232128	INSR, GAPDHS, MTHFR, DHCR24, ENO1, VEGFA	56	99	9702	10.5	0.180605	0.0114865	0.0109778
DISGENET	C0276496~Familial Alzheimer Disease (FAD)	6	8.57143	0.000243299	INSR, GAPDHS, MTHFR, DHCR24, ENO1, VEGFA	56	100	9702	10.395	0.188423	0.0114865	0.0109778
DISGENET	C0002395~Alzheimer's Disease	6	8.57143	0.000254875	INSR, GAPDHS, MTHFR, DHCR24, ENO1, VEGFA	56	101	9702	10.2921	0.196446	0.0114865	0.0109778
DISGENET	C0752307~Anoxia-Ischemia, Cerebral	3	4.28571	0.000312123	NOS2, HIF1A, VEGFA	56	5	9702	103.95	0.234972	0.0114865	0.0109778
DISGENET	C0519066~Acute Q fever	3	4.28571	0.000312123	DHCR24, HMGCR, LSS	56	5	9702	103.95	0.234972	0.0114865	0.0109778
DISGENET	C0034362~Q Fever	3	4.28571	0.000312123	DHCR24, HMGCR, LSS	56	5	9702	103.95	0.234972	0.0114865	0.0109778
DISGENET	C2973787~Coxiella burnetii Infection	3	4.28571	0.000312123	DHCR24, HMGCR, LSS	56	5	9702	103.95	0.234972	0.0114865	0.0109778
DISGENET	C0752304~Hypoxic-Ischemic Encephalopathy	3	4.28571	0.000312123	NOS2, HIF1A, VEGFA	56	5	9702	103.95	0.234972	0.0114865	0.0109778
DISGENET	C0178540~Cerebral Hypoxia-Ischemia	3	4.28571	0.000312123	NOS2, HIF1A, VEGFA	56	5	9702	103.95	0.234972	0.0114865	0.0109778
DISGENET	C0752305~Anoxic-Ischemic Encephalopathy	3	4.28571	0.000312123	NOS2, HIF1A, VEGFA	56	5	9702	103.95	0.234972	0.0114865	0.0109778
DISGENET	C0752306~Anoxia-Ischemia, Brain	3	4.28571	0.000312123	NOS2, HIF1A, VEGFA	56	5	9702	103.95	0.234972	0.0114865	0.0109778
DISGENET	C0752308~Hypoxia-Ischemia, Brain	3	4.28571	0.000312123	NOS2, HIF1A, VEGFA	56	5	9702	103.95	0.234972	0.0114865	0.0109778
DISGENET	C1443892~Chronic Q Fever	3	4.28571	0.000312123	DHCR24, HMGCR, LSS	56	5	9702	103.95	0.234972	0.0114865	0.0109778
DISGENET	C0038433~Streptozotocin Diabetes	6	8.57143	0.000348076	NOS2, INSR, IRS2, PCK1, BCL2L1, VEGFA	56	108	9702	9.625	0.258219	0.0114865	0.0109778
DISGENET	C0002152~Alloxan Diabetes	6	8.57143	0.000348076	NOS2, INSR, IRS2, PCK1, BCL2L1, VEGFA	56	108	9702	9.625	0.258219	0.0114865	0.0109778
DISGENET	C0011853~Diabetes Mellitus, Experimental	6	8.57143	0.000348076	NOS2, INSR, IRS2, PCK1, BCL2L1, VEGFA	56	108	9702	9.625	0.258219	0.0114865	0.0109778
DISGENET	C0006142~Malignant neoplasm of breast	16	22.8571	0.000688712	GPI, ATF2, JUN, HSP90AA1, PFKFB4, CDKN1B, NOS2, SLC2A1, MTHFR, ENO1, HIF1A, MDM2, KDR, ALDOA, PRODH, ITGA9	56	1074	9702	2.58101	0.446292	0.0218857	0.0209164
DISGENET	C0345904~Malignant neoplasm of liver	6	8.57143	0.00120954	JUN, EGLN3, CDKN1B, SCD, HGF, SLC2A1	56	142	9702	7.32042	0.645984	0.0357857	0.0342008
DISGENET	C0023903~Liver neoplasms	6	8.57143	0.00120954	JUN, EGLN3, CDKN1B, SCD, HGF, SLC2A1	56	142	9702	7.32042	0.645984	0.0357857	0.0342008
DISGENET	C0009375~Colonic Neoplasms	6	8.57143	0.00163633	JUN, NOS2, ODC1, SLC2A1, MTHFR, VEGFA	56	152	9702	6.83882	0.754663	0.0467991	0.0447264
DISGENET	C0007102~Malignant tumor of colon	6	8.57143	0.00199491	JUN, NOS2, ODC1, SLC2A1, MTHFR, VEGFA	56	159	9702	6.53774	0.819737	0.0552138	0.0527685
DISGENET	C1269683~Major Depressive Disorder	7	10	0.00241005	LDHA, HSP90AA1, DDIT4, KDR, MTHFR, HIF1A, VEGFA	56	243	9702	4.99074	0.873854	0.0646194	0.0617575
DISGENET	C0235527~Heart Failure, Right-Sided	5	7.14286	0.00342133	NOS2, EPHX2, PCK1, HIF1A, VEGFA	56	110	9702	7.875	0.947163	0.0772501	0.0738287
DISGENET	C1961112~Heart Decompensation	5	7.14286	0.00342133	NOS2, EPHX2, PCK1, HIF1A, VEGFA	56	110	9702	7.875	0.947163	0.0772501	0.0738287
DISGENET	C0023212~Left-Sided Heart Failure	5	7.14286	0.00342133	NOS2, EPHX2, PCK1, HIF1A, VEGFA	56	110	9702	7.875	0.947163	0.0772501	0.0738287
DISGENET	C0018802~Congestive heart failure	5	7.14286	0.00342133	NOS2, EPHX2, PCK1, HIF1A, VEGFA	56	110	9702	7.875	0.947163	0.0772501	0.0738287
DISGENET	C0018801~Heart failure	5	7.14286	0.00342133	NOS2, EPHX2, PCK1, HIF1A, VEGFA	56	110	9702	7.875	0.947163	0.0772501	0.0738287
DISGENET	C1959583~Myocardial Failure	5	7.14286	0.00342133	NOS2, EPHX2, PCK1, HIF1A, VEGFA	56	110	9702	7.875	0.947163	0.0772501	0.0738287
DISGENET	C0027626~Neoplasm Invasiveness	6	8.57143	0.00375339	PKM, HGF, ACO1, ENO1, ALDOA, HIF1A	56	184	9702	5.64946	0.960303	0.0825747	0.0789175
DISGENET	C0018923~Hemangiosarcoma	3	4.28571	0.00455497	JUN, KDR, VEGFA	56	18	9702	28.875	0.980101	0.0959181	0.09167
DISGENET	C0007786~Brain Ischemia	4	5.71429	0.00469529	JUN, NOS2, MTHFR, HIF1A	56	60	9702	11.55	0.982368	0.0959181	0.09167
DISGENET	C0917798~Cerebral Ischemia	4	5.71429	0.00469529	JUN, NOS2, MTHFR, HIF1A	56	60	9702	11.55	0.982368	0.0959181	0.09167
DISGENET	C0002170~Alopecia	3	4.28571	0.00507242	ODC1, MTHFR, LSS	56	19	9702	27.3553	0.987263	0.101212	0.0967298
DISGENET	C0006826~Malignant Neoplasms	5	7.14286	0.00586538	ATF2, CDKN1B, MDM2, KDR, VEGFA	56	128	9702	6.76758	0.993573	0.114375	0.109309
DISGENET	C1261473~Sarcoma	3	4.28571	0.00618429	JUN, MDM2, MCL1	56	21	9702	24.75	0.99512	0.117914	0.112691
DISGENET	C0036572~Seizures	6	8.57143	0.00764541	NOS2, GLDC, SLC2A1, MTHFR, LSS, FDFT1	56	218	9702	4.76835	0.998619	0.136955	0.13089
DISGENET	C0023895~Liver diseases	4	5.71429	0.00780156	NOS2, SC5D, MTHFR, BCL2L1	56	72	9702	9.625	0.998793	0.136955	0.13089
DISGENET	C0086565~Liver Dysfunction	4	5.71429	0.00780156	NOS2, SC5D, MTHFR, BCL2L1	56	72	9702	9.625	0.998793	0.136955	0.13089
DISGENET	C0007621~Neoplastic Cell Transformation	5	7.14286	0.00782147	JUN, NOS2, MDM2, SLC2A1, HIF1A	56	139	9702	6.23201	0.998814	0.136955	0.13089
DISGENET	C0011860~Diabetes Mellitus, Non-Insulin-Dependent	6	8.57143	0.00808735	NOS2, INSR, SLC2A1, INPPL1, IRS2, BCL2L1	56	221	9702	4.70362	0.999058	0.138779	0.132633
DISGENET	C2937358~Cerebral Hemorrhage	3	4.28571	0.0108533	KDR, BCL2L1, VEGFA	56	28	9702	18.5625	0.999914	0.182591	0.174504
DISGENET	C0007131~Non-Small Cell Lung Carcinoma	5	7.14286	0.0116186	MDM2, KDR, ENO1, HIF1A, VEGFA	56	156	9702	5.55288	0.999956	0.191707	0.183216
DISGENET	C0027055~Myocardial Reperfusion Injury	4	5.71429	0.0122705	NOS2, EPHX2, HIF1A, VEGFA	56	85	9702	8.15294	0.999975	0.194965	0.18633
DISGENET	C0030567~Parkinson Disease	4	5.71429	0.0122705	HGF, INSR, DDIT4, MTHFR	56	85	9702	8.15294	0.999975	0.194965	0.18633
DISGENET	C0205698~Undifferentiated carcinoma	5	7.14286	0.0134751	PKM, SCD, ENO1, HIF1A, BCL2L1	56	163	9702	5.31442	0.999991	0.198579	0.189784
DISGENET	C0205699~Carcinomatosis	5	7.14286	0.0134751	PKM, SCD, ENO1, HIF1A, BCL2L1	56	163	9702	5.31442	0.999991	0.198579	0.189784
DISGENET	C0205696~Anaplastic carcinoma	5	7.14286	0.0134751	PKM, SCD, ENO1, HIF1A, BCL2L1	56	163	9702	5.31442	0.999991	0.198579	0.189784
DISGENET	C0205697~Carcinoma, Spindle-Cell	5	7.14286	0.0134751	PKM, SCD, ENO1, HIF1A, BCL2L1	56	163	9702	5.31442	0.999991	0.198579	0.189784
DISGENET	C0007097~Carcinoma	5	7.14286	0.0137549	PKM, SCD, ENO1, HIF1A, BCL2L1	56	164	9702	5.28201	0.999993	0.198579	0.189784
DISGENET	C0035126~Reperfusion Injury	4	5.71429	0.0138866	JUN, NOS2, HGF, KDR	56	89	9702	7.78652	0.999994	0.198579	0.189784
DISGENET	C0525045~Mood Disorders	5	7.14286	0.014911	LDHA, HSP90AA1, MTHFR, HIF1A, VEGFA	56	168	9702	5.15625	0.999997	0.209732	0.200443
DISGENET	C0041696~Unipolar Depression	6	8.57143	0.0153144	LDHA, HSP90AA1, DDIT4, KDR, MTHFR, HIF1A	56	259	9702	4.01351	0.999998	0.211932	0.202546
DISGENET	C0024121~Lung Neoplasms	6	8.57143	0.0167554	JUN, CDKN1B, NOS2, MTHFR, BCL2L1, MCL1	56	265	9702	3.92264	0.999999	0.227962	0.217865
DISGENET	C0242379~Malignant neoplasm of lung	6	8.57143	0.0170041	JUN, CDKN1B, NOS2, MTHFR, BCL2L1, MCL1	56	266	9702	3.90789	1	0.227962	0.217865
DISGENET	C0151744~Myocardial Ischemia	5	7.14286	0.0174044	EPHX2, HGF, KDR, ALDOA, VEGFA	56	176	9702	4.92188	1	0.229737	0.219563
DISGENET	C0030297~Pancreatic Neoplasm	4	5.71429	0.0189309	LDHA, KDR, HIF1A, BCL2L1	56	100	9702	6.93	1	0.241652	0.23095
DISGENET	C0022660~Kidney Failure, Acute	4	5.71429	0.0194336	NOS2, EPHX2, MTHFR, VEGFA	56	101	9702	6.86139	1	0.241652	0.23095
DISGENET	C1565662~Acute Kidney Insufficiency	4	5.71429	0.0194336	NOS2, EPHX2, MTHFR, VEGFA	56	101	9702	6.86139	1	0.241652	0.23095
DISGENET	C2609414~Acute kidney injury	4	5.71429	0.0194336	NOS2, EPHX2, MTHFR, VEGFA	56	101	9702	6.86139	1	0.241652	0.23095
DISGENET	C0346647~Malignant neoplasm of pancreas	4	5.71429	0.0199436	LDHA, KDR, HIF1A, BCL2L1	56	102	9702	6.79412	1	0.244451	0.233624
DISGENET	C0023904~Liver Neoplasms, Experimental	4	5.71429	0.0242895	SQLE, HGF, KDR, BCL2L1	56	110	9702	6.3	1	0.281627	0.269154
DISGENET	C0019207~Hepatoma, Morris	4	5.71429	0.0242895	SQLE, HGF, KDR, BCL2L1	56	110	9702	6.3	1	0.281627	0.269154
DISGENET	C0019208~Hepatoma, Novikoff	4	5.71429	0.0242895	SQLE, HGF, KDR, BCL2L1	56	110	9702	6.3	1	0.281627	0.269154
DISGENET	C0086404~Experimental Hepatoma	4	5.71429	0.0242895	SQLE, HGF, KDR, BCL2L1	56	110	9702	6.3	1	0.281627	0.269154
DISGENET	C1708349~Hereditary Diffuse Gastric Cancer	6	8.57143	0.024678	JUN, CDKN1B, MTHFR, IRS2, ENO1, BCL2L1	56	293	9702	3.54778	1	0.282316	0.269813
DISGENET	C0018798~Congenital Heart Defects	3	4.28571	0.0256409	MTHFR, HIF1A, VEGFA	56	44	9702	11.8125	1	0.289467	0.276647
DISGENET	C0038356~Stomach Neoplasms	6	8.57143	0.0259778	JUN, CDKN1B, MTHFR, IRS2, ENO1, BCL2L1	56	297	9702	3.5	1	0.289467	0.276647
DISGENET	C0024623~Malignant neoplasm of stomach	6	8.57143	0.0269812	JUN, CDKN1B, MTHFR, IRS2, ENO1, BCL2L1	56	300	9702	3.465	1	0.296794	0.283649
DISGENET	C1332347~Atypical Ductal Breast Hyperplasia	2	2.85714	0.0280308	SLC2A1, HIF1A	56	5	9702	69.3	1	0.300631	0.287316
DISGENET	C0007124~Noninfiltrating Intraductal Carcinoma	2	2.85714	0.0280308	SLC2A1, HIF1A	56	5	9702	69.3	1	0.300631	0.287316
DISGENET	C0917731~Male sterility	3	4.28571	0.0301384	MDM2, MTHFR, ENO1	56	48	9702	10.8281	1	0.311551	0.297753
DISGENET	C0021364~Male infertility	3	4.28571	0.0301384	MDM2, MTHFR, ENO1	56	48	9702	10.8281	1	0.311551	0.297753
DISGENET	C0848676~Subfertility, Male	3	4.28571	0.0301384	MDM2, MTHFR, ENO1	56	48	9702	10.8281	1	0.311551	0.297753
DISGENET	C0027686~Pathologic Neovascularization	2	2.85714	0.0335437	KDR, VEGFA	56	6	9702	57.75	1	0.338594	0.323598
DISGENET	C0008313~Cholangitis, Sclerosing	2	2.85714	0.0335437	NOS2, HIF1A	56	6	9702	57.75	1	0.338594	0.323598
DISGENET	C0027627~Neoplasm Metastasis	5	7.14286	0.0341853	HSP90AA1, HGF, MTHFR, ALDOA, VEGFA	56	217	9702	3.99194	1	0.341058	0.325952
DISGENET	C0027765~nervous system disorder	3	4.28571	0.0361647	SLC2A1, MTHFR, PRODH	56	53	9702	9.8066	1	0.356659	0.340863
DISGENET	C0566602~Primary sclerosing cholangitis	2	2.85714	0.0444775	NOS2, HIF1A	56	8	9702	43.3125	1	0.433656	0.414449
DISGENET	C0037116~Silicosis	2	2.85714	0.0498988	JUN, NOS2	56	9	9702	38.5	1	0.479795	0.458545
DISGENET	C0005586~Bipolar Disorder	7	10	0.051892	LDHA, PC, MTHFR, PRODH, HIF1A, ITGA9, VEGFA	56	477	9702	2.54245	1	0.479795	0.458545
DISGENET	C0027659~Neoplasms, Experimental	3	4.28571	0.0537431	HGF, HIF1A, VEGFA	56	66	9702	7.875	1	0.479795	0.458545
DISGENET	C0393734~Complex Partial Status Epilepticus	3	4.28571	0.0552001	JUN, NOS2, VEGFA	56	67	9702	7.75746	1	0.479795	0.458545
DISGENET	C0751522~Status Epilepticus, Subclinical	3	4.28571	0.0552001	JUN, NOS2, VEGFA	56	67	9702	7.75746	1	0.479795	0.458545
DISGENET	C0751523~Non-Convulsive Status Epilepticus	3	4.28571	0.0552001	JUN, NOS2, VEGFA	56	67	9702	7.75746	1	0.479795	0.458545
DISGENET	C0270823~Petit mal status	3	4.28571	0.0552001	JUN, NOS2, VEGFA	56	67	9702	7.75746	1	0.479795	0.458545
DISGENET	C0751524~Simple Partial Status Epilepticus	3	4.28571	0.0552001	JUN, NOS2, VEGFA	56	67	9702	7.75746	1	0.479795	0.458545
DISGENET	C0311335~Grand Mal Status Epilepticus	3	4.28571	0.0552001	JUN, NOS2, VEGFA	56	67	9702	7.75746	1	0.479795	0.458545
DISGENET	C0242350~Erectile dysfunction	2	2.85714	0.0552898	BCL2L1, VEGFA	56	10	9702	34.65	1	0.479795	0.458545
DISGENET	C0011570~Mental Depression	5	7.14286	0.055361	LDHA, NOS2, MTHFR, HIF1A, VEGFA	56	254	9702	3.41043	1	0.479795	0.458545
DISGENET	C0038220~Status Epilepticus	3	4.28571	0.056671	JUN, NOS2, VEGFA	56	68	9702	7.64338	1	0.486237	0.464702
DISGENET	C0520572~Enzymopathy	2	2.85714	0.0606509	ENO1, ALDOA	56	11	9702	31.5	1	0.505228	0.482851
DISGENET	C0342257~Complications of Diabetes Mellitus	2	2.85714	0.0606509	HIF1A, VEGFA	56	11	9702	31.5	1	0.505228	0.482851
DISGENET	C1176475~Ductal Carcinoma	2	2.85714	0.0606509	SLC2A1, HIF1A	56	11	9702	31.5	1	0.505228	0.482851
DISGENET	C0023893~Liver Cirrhosis, Experimental	9	12.8571	0.0686881	PC, PPP1R3C, NOS2, HGF, INPPL1, HMGCR, PCK1, PRODH, VEGFA	56	774	9702	2.01453	1	0.556648	0.531995
DISGENET	C0037268~Skin Abnormalities	2	2.85714	0.0712835	LSS, FDFT1	56	13	9702	26.6538	1	0.556648	0.531995
DISGENET	C0546837~Malignant neoplasm of esophagus	3	4.28571	0.0721037	NOS2, KDR, ENO1	56	78	9702	6.66346	1	0.556648	0.531995
DISGENET	C0014859~Esophageal Neoplasms	3	4.28571	0.0721037	NOS2, KDR, ENO1	56	78	9702	6.66346	1	0.556648	0.531995
DISGENET	C0024115~Lung diseases	3	4.28571	0.0721037	INSR, HIF1A, VEGFA	56	78	9702	6.66346	1	0.556648	0.531995
DISGENET	C0003873~Rheumatoid Arthritis	4	5.71429	0.075612	DDIT4, MTHFR, ENO1, VEGFA	56	174	9702	3.98276	1	0.556648	0.531995
DISGENET	C0393835~Diabetic Asymmetric Polyneuropathy	2	2.85714	0.0765553	HGF, INSR	56	14	9702	24.75	1	0.556648	0.531995
DISGENET	C0271680~Diabetic Polyneuropathies	2	2.85714	0.0765553	HGF, INSR	56	14	9702	24.75	1	0.556648	0.531995
DISGENET	C0271685~Diabetic Amyotrophy	2	2.85714	0.0765553	HGF, INSR	56	14	9702	24.75	1	0.556648	0.531995
DISGENET	C0271678~Diabetic Mononeuropathy	2	2.85714	0.0765553	HGF, INSR	56	14	9702	24.75	1	0.556648	0.531995
DISGENET	C0751074~Diabetic Neuralgia	2	2.85714	0.0765553	HGF, INSR	56	14	9702	24.75	1	0.556648	0.531995
DISGENET	C0271674~Asymmetric Diabetic Proximal Motor Neuropathy	2	2.85714	0.0765553	HGF, INSR	56	14	9702	24.75	1	0.556648	0.531995
DISGENET	C0271673~Symmetric Diabetic Proximal Motor Neuropathy	2	2.85714	0.0765553	HGF, INSR	56	14	9702	24.75	1	0.556648	0.531995
DISGENET	C0011882~Diabetic Neuropathies	2	2.85714	0.0765553	HGF, INSR	56	14	9702	24.75	1	0.556648	0.531995
DISGENET	C0271686~Diabetic Autonomic Neuropathy	2	2.85714	0.0765553	HGF, INSR	56	14	9702	24.75	1	0.556648	0.531995
DISGENET	C3541456~Spondyloepiphyseal Dysplasia Tarda, X-Linked	2	2.85714	0.0870111	KDR, VEGFA	56	16	9702	21.6562	1	0.592504	0.566263
DISGENET	C0004763~Barrett Esophagus	2	2.85714	0.0870111	HGF, MCL1	56	16	9702	21.6562	1	0.592504	0.566263
DISGENET	C0745103~Hyperlipoproteinemia Type IIa	2	2.85714	0.0870111	EPHX2, HMGCR	56	16	9702	21.6562	1	0.592504	0.566263
DISGENET	C0025237~Melnick-Needles Syndrome	2	2.85714	0.0870111	KDR, VEGFA	56	16	9702	21.6562	1	0.592504	0.566263
DISGENET	C1258085~Barrett Epithelium	2	2.85714	0.0870111	HGF, MCL1	56	16	9702	21.6562	1	0.592504	0.566263
DISGENET	C0038015~Spondyloepiphyseal Dysplasia	2	2.85714	0.0870111	KDR, VEGFA	56	16	9702	21.6562	1	0.592504	0.566263
DISGENET	C0036391~Schwartz-Jampel Syndrome	2	2.85714	0.0870111	KDR, VEGFA	56	16	9702	21.6562	1	0.592504	0.566263
DISGENET	C4551479~Schwartz-Jampel Syndrome, Type 1	2	2.85714	0.0870111	KDR, VEGFA	56	16	9702	21.6562	1	0.592504	0.566263
DISGENET	C0432272~Van Buchem disease	2	2.85714	0.0921954	KDR, VEGFA	56	17	9702	20.3824	1	0.611613	0.584525
DISGENET	C0042373~Vascular Diseases	2	2.85714	0.0921954	HGF, MTHFR	56	17	9702	20.3824	1	0.611613	0.584525
DISGENET	C0520459~Necrotizing Enterocolitis	2	2.85714	0.0921954	NOS2, ENO1	56	17	9702	20.3824	1	0.611613	0.584525
DISGENET	C0020538~Hypertensive disease	4	5.71429	0.0926687	JUN, NOS2, INPPL1, HIF1A	56	190	9702	3.64737	1	0.611613	0.584525
DISGENET	C0038358~Gastric ulcer	2	2.85714	0.0973507	NOS2, VEGFA	56	18	9702	19.25	1	0.628486	0.600651
DISGENET	C0086743~Osteoarthrosis Deformans	3	4.28571	0.0974227	SLC2A1, ACO1, ENO1	56	93	9702	5.58871	1	0.628486	0.600651
DISGENET	C0029408~Degenerative polyarthritis	3	4.28571	0.0974227	SLC2A1, ACO1, ENO1	56	93	9702	5.58871	1	0.628486	0.600651

## Sheet: Liver KEGG
Category	Term	Count	%	p-value	Genes	List Total	Pop Hits	Pop Total	Fold Enrichment	Bonferroni	Benjamini	FDR
DISGENET	C0002152~Alloxan Diabetes	10	9.43396	3.44521e-07	SREBF1, NOS2, INSR, BAX, IRS2, PPARG, PCK1, ATF3, BCL2L1, VEGFA	85	108	9702	10.5686	0.000321731	0.000107261	0.00010106
DISGENET	C0038433~Streptozotocin Diabetes	10	9.43396	3.44521e-07	SREBF1, NOS2, INSR, BAX, IRS2, PPARG, PCK1, ATF3, BCL2L1, VEGFA	85	108	9702	10.5686	0.000321731	0.000107261	0.00010106
DISGENET	C0011853~Diabetes Mellitus, Experimental	10	9.43396	3.44521e-07	SREBF1, NOS2, INSR, BAX, IRS2, PPARG, PCK1, ATF3, BCL2L1, VEGFA	85	108	9702	10.5686	0.000321731	0.000107261	0.00010106
DISGENET	C1257931~Mammary Neoplasms, Human	18	16.9811	1.95745e-06	GPI, JUN, HSP90AA1, CDKN1B, NOS2, SLC2A1, ENO1, HIF1A, EGFR, GNAI2, NFKBIA, HHEX, DDIT3, MDM2, KDR, BAX, ALDOA, PPARGC1B	85	525	9702	3.91341	0.00182659	0.000320984	0.000302426
DISGENET	C4704874~Mammary Carcinoma, Human	18	16.9811	1.95745e-06	GPI, JUN, HSP90AA1, CDKN1B, NOS2, SLC2A1, ENO1, HIF1A, EGFR, GNAI2, NFKBIA, HHEX, DDIT3, MDM2, KDR, BAX, ALDOA, PPARGC1B	85	525	9702	3.91341	0.00182659	0.000320984	0.000302426
DISGENET	C1458155~Mammary Neoplasms	18	16.9811	2.062e-06	GPI, JUN, HSP90AA1, CDKN1B, NOS2, SLC2A1, ENO1, HIF1A, EGFR, GNAI2, NFKBIA, HHEX, DDIT3, MDM2, KDR, BAX, ALDOA, PPARGC1B	85	527	9702	3.89856	0.00192405	0.000320984	0.000302426
DISGENET	C0678222~Breast Carcinoma	18	16.9811	2.73288e-06	GPI, JUN, HSP90AA1, CDKN1B, NOS2, SLC2A1, ENO1, HIF1A, EGFR, GNAI2, NFKBIA, HHEX, DDIT3, MDM2, KDR, BAX, ALDOA, PPARGC1B	85	538	9702	3.81885	0.00254926	0.000364644	0.000343562
DISGENET	C0006142~Malignant neoplasm of breast	25	23.5849	8.16683e-06	GPI, ATF2, PFKFB4, CDKN1B, SLC2A1, ENO1, HIF1A, EGFR, GNAI2, HHEX, KDR, PRODH, PPARGC1B, JUN, HSP90AA1, NOS2, PER2, NFKBIA, PER1, DDIT3, NEDD4, MDM2, BAX, ALDOA, ITGA9	85	1074	9702	2.65692	0.00759884	0.000953478	0.000898352
DISGENET	C2239176~Liver carcinoma	16	15.0943	2.51883e-05	SREBF1, JUN, CEBPB, CDKN1B, HGF, SLC2A1, IRS2, ENO1, EGFR, GYS2, NFKBIA, PKM, SCD, PPARG, PCK1, BCL2L1	85	507	9702	3.60209	0.0232515	0.00261398	0.00246285
DISGENET	C0011860~Diabetes Mellitus, Non-Insulin-Dependent	10	9.43396	0.000117289	HHEX, NOS2, INSR, SLC2A1, INPPL1, IRS2, PPARG, ATF3, EGFR, BCL2L1	85	221	9702	5.16476	0.103766	0.00976686	0.00920218
DISGENET	C0030246~Pustulosis of Palms and Soles	6	5.66038	0.000126883	NFKBIA, NOS2, REL, TNFAIP3, PPARG, VEGFA	85	57	9702	12.0149	0.111763	0.00976686	0.00920218
DISGENET	C0033860~Psoriasis	6	5.66038	0.000126883	NFKBIA, NOS2, REL, TNFAIP3, PPARG, VEGFA	85	57	9702	12.0149	0.111763	0.00976686	0.00920218
DISGENET	C0011265~Presenile dementia	7	6.60377	0.000207318	INSR, GAPDHS, BAX, DHCR24, PPARG, ENO1, VEGFA	85	99	9702	8.07059	0.176058	0.00976686	0.00920218
DISGENET	C0494463~Alzheimer Disease, Late Onset	7	6.60377	0.000207318	INSR, GAPDHS, BAX, DHCR24, PPARG, ENO1, VEGFA	85	99	9702	8.07059	0.176058	0.00976686	0.00920218
DISGENET	C0750901~Alzheimer Disease, Early Onset	7	6.60377	0.000207318	INSR, GAPDHS, BAX, DHCR24, PPARG, ENO1, VEGFA	85	99	9702	8.07059	0.176058	0.00976686	0.00920218
DISGENET	C0750900~Alzheimer's Disease, Focal Onset	7	6.60377	0.000207318	INSR, GAPDHS, BAX, DHCR24, PPARG, ENO1, VEGFA	85	99	9702	8.07059	0.176058	0.00976686	0.00920218
DISGENET	C0546126~Acute Confusional Senile Dementia	7	6.60377	0.000207318	INSR, GAPDHS, BAX, DHCR24, PPARG, ENO1, VEGFA	85	99	9702	8.07059	0.176058	0.00976686	0.00920218
DISGENET	C0030297~Pancreatic Neoplasm	7	6.60377	0.00021904	NFKBIA, LDHA, KDR, PPARG, HIF1A, EGFR, BCL2L1	85	100	9702	7.98988	0.185032	0.00976686	0.00920218
DISGENET	C0276496~Familial Alzheimer Disease (FAD)	7	6.60377	0.00021904	INSR, GAPDHS, BAX, DHCR24, PPARG, ENO1, VEGFA	85	100	9702	7.98988	0.185032	0.00976686	0.00920218
DISGENET	C0023903~Liver neoplasms	8	7.54717	0.000219598	JUN, EGLN3, CDKN1B, SCD, HGF, SLC2A1, PPARG, ATF3	85	142	9702	6.43049	0.185456	0.00976686	0.00920218
DISGENET	C0345904~Malignant neoplasm of liver	8	7.54717	0.000219598	JUN, EGLN3, CDKN1B, SCD, HGF, SLC2A1, PPARG, ATF3	85	142	9702	6.43049	0.185456	0.00976686	0.00920218
DISGENET	C0002395~Alzheimer's Disease	7	6.60377	0.000231279	INSR, GAPDHS, BAX, DHCR24, PPARG, ENO1, VEGFA	85	101	9702	7.91077	0.194296	0.00981882	0.00925114
DISGENET	C0346647~Malignant neoplasm of pancreas	7	6.60377	0.00024405	NFKBIA, LDHA, KDR, PPARG, HIF1A, EGFR, BCL2L1	85	102	9702	7.83322	0.203852	0.00991054	0.00933755
DISGENET	C0206726~gliosarcoma	4	3.77358	0.000323228	NFKBIA, PPARG, EGFR, VEGFA	85	16	9702	28.5353	0.26062	0.0124488	0.011729
DISGENET	C0009375~Colonic Neoplasms	8	7.54717	0.000333211	JUN, NOS2, ODC1, SLC2A1, BAX, PPARG, EGFR, VEGFA	85	152	9702	6.00743	0.267485	0.0124488	0.011729
DISGENET	C0007131~Non-Small Cell Lung Carcinoma	8	7.54717	0.000390134	PXN, MDM2, KDR, ENO1, HIF1A, ATF3, EGFR, VEGFA	85	156	9702	5.85339	0.305426	0.0140148	0.0132045
DISGENET	C0007102~Malignant tumor of colon	8	7.54717	0.00043774	JUN, NOS2, ODC1, SLC2A1, BAX, PPARG, EGFR, VEGFA	85	159	9702	5.74295	0.335645	0.0151425	0.0142671
DISGENET	C0205699~Carcinomatosis	8	7.54717	0.000508328	PKM, SCD, SLC25A10, ENO1, HIF1A, EGFR, GNAI2, BCL2L1	85	163	9702	5.60202	0.378052	0.0153154	0.01443
DISGENET	C0205697~Carcinoma, Spindle-Cell	8	7.54717	0.000508328	PKM, SCD, SLC25A10, ENO1, HIF1A, EGFR, GNAI2, BCL2L1	85	163	9702	5.60202	0.378052	0.0153154	0.01443
DISGENET	C0205696~Anaplastic carcinoma	8	7.54717	0.000508328	PKM, SCD, SLC25A10, ENO1, HIF1A, EGFR, GNAI2, BCL2L1	85	163	9702	5.60202	0.378052	0.0153154	0.01443
DISGENET	C0205698~Undifferentiated carcinoma	8	7.54717	0.000508328	PKM, SCD, SLC25A10, ENO1, HIF1A, EGFR, GNAI2, BCL2L1	85	163	9702	5.60202	0.378052	0.0153154	0.01443
DISGENET	C0007097~Carcinoma	8	7.54717	0.000527322	PKM, SCD, SLC25A10, ENO1, HIF1A, EGFR, GNAI2, BCL2L1	85	164	9702	5.56786	0.388994	0.0153912	0.0145014
DISGENET	C0752304~Hypoxic-Ischemic Encephalopathy	3	2.83019	0.000728318	NOS2, HIF1A, VEGFA	85	5	9702	68.4847	0.493634	0.0179013	0.0168663
DISGENET	C0752305~Anoxic-Ischemic Encephalopathy	3	2.83019	0.000728318	NOS2, HIF1A, VEGFA	85	5	9702	68.4847	0.493634	0.0179013	0.0168663
DISGENET	C0178540~Cerebral Hypoxia-Ischemia	3	2.83019	0.000728318	NOS2, HIF1A, VEGFA	85	5	9702	68.4847	0.493634	0.0179013	0.0168663
DISGENET	C0752306~Anoxia-Ischemia, Brain	3	2.83019	0.000728318	NOS2, HIF1A, VEGFA	85	5	9702	68.4847	0.493634	0.0179013	0.0168663
DISGENET	C0752307~Anoxia-Ischemia, Cerebral	3	2.83019	0.000728318	NOS2, HIF1A, VEGFA	85	5	9702	68.4847	0.493634	0.0179013	0.0168663
DISGENET	C0752308~Hypoxia-Ischemia, Brain	3	2.83019	0.000728318	NOS2, HIF1A, VEGFA	85	5	9702	68.4847	0.493634	0.0179013	0.0168663
DISGENET	C0334588~Giant Cell Glioblastoma	6	5.66038	0.000779458	NFKBIA, BHLHE40, PPARG, HIF1A, EGFR, VEGFA	85	84	9702	8.15294	0.51727	0.018667	0.0175878
DISGENET	C0151744~Myocardial Ischemia	8	7.54717	0.000802622	NFKBIA, DUSP1, HGF, NEDD4, BHLHE40, KDR, ALDOA, VEGFA	85	176	9702	5.18824	0.52761	0.0187309	0.017648
DISGENET	C0006826~Malignant Neoplasms	7	6.60377	0.000822235	ATF2, CDKN1B, SRF, MDM2, KDR, EGFR, VEGFA	85	128	9702	6.2421	0.536191	0.0187309	0.017648
DISGENET	C0376407~Granulomatous Slack Skin	4	3.77358	0.000856162	BAX, TNFAIP3, NFKB2, MCL1	85	22	9702	20.7529	0.55067	0.0190394	0.0179386
DISGENET	C0079773~Lymphoma, T-Cell, Cutaneous	4	3.77358	0.00097846	BAX, TNFAIP3, NFKB2, MCL1	85	23	9702	19.8506	0.599214	0.0212531	0.0200243
DISGENET	C1269683~Major Depressive Disorder	9	8.49057	0.00116641	HDAC5, LDHA, HSP90AA1, HSPA1L, DDIT4, KDR, HIF1A, EGFR, VEGFA	85	243	9702	4.22745	0.663805	0.0247597	0.0233282
DISGENET	C0007621~Neoplastic Cell Transformation	7	6.60377	0.00126244	JUN, NOS2, PXN, MDM2, SLC2A1, TNFAIP3, HIF1A	85	139	9702	5.74812	0.692679	0.0262026	0.0246877
DISGENET	C0027051~Myocardial Infarction	6	5.66038	0.00135832	LDHA, NOS2, DDIT3, CREM, BAX, BCL2L1	85	95	9702	7.20892	0.719036	0.0275797	0.0259852
DISGENET	C0017919~Glycogen Storage Disease	4	3.77358	0.00157622	GYS2, GYS1, LDHA, ALDOA	85	27	9702	16.9098	0.770843	0.0313232	0.0295122
DISGENET	C2937358~Cerebral Hemorrhage	4	3.77358	0.0017544	KDR, BAX, BCL2L1, VEGFA	85	28	9702	16.3059	0.806029	0.0316794	0.0298479
DISGENET	C0007786~Brain Ischemia	5	4.71698	0.00176374	NFKBIA, CEBPB, JUN, NOS2, HIF1A	85	60	9702	9.51176	0.807717	0.0316794	0.0298479
DISGENET	C0917798~Cerebral Ischemia	5	4.71698	0.00176374	NFKBIA, CEBPB, JUN, NOS2, HIF1A	85	60	9702	9.51176	0.807717	0.0316794	0.0298479
DISGENET	C0021655~Insulin Resistance	5	4.71698	0.00176374	SREBF1, INSR, IRS2, PPARG, EGFR	85	60	9702	9.51176	0.807717	0.0316794	0.0298479
DISGENET	C0920563~Insulin Sensitivity	5	4.71698	0.00176374	SREBF1, INSR, IRS2, PPARG, EGFR	85	60	9702	9.51176	0.807717	0.0316794	0.0298479
DISGENET	C0751524~Simple Partial Status Epilepticus	5	4.71698	0.00264823	MEF2C, JUN, JUND, NOS2, VEGFA	85	67	9702	8.518	0.915983	0.0426457	0.0401801
DISGENET	C0270823~Petit mal status	5	4.71698	0.00264823	MEF2C, JUN, JUND, NOS2, VEGFA	85	67	9702	8.518	0.915983	0.0426457	0.0401801
DISGENET	C0311335~Grand Mal Status Epilepticus	5	4.71698	0.00264823	MEF2C, JUN, JUND, NOS2, VEGFA	85	67	9702	8.518	0.915983	0.0426457	0.0401801
DISGENET	C0751522~Status Epilepticus, Subclinical	5	4.71698	0.00264823	MEF2C, JUN, JUND, NOS2, VEGFA	85	67	9702	8.518	0.915983	0.0426457	0.0401801
DISGENET	C0393734~Complex Partial Status Epilepticus	5	4.71698	0.00264823	MEF2C, JUN, JUND, NOS2, VEGFA	85	67	9702	8.518	0.915983	0.0426457	0.0401801
DISGENET	C0751523~Non-Convulsive Status Epilepticus	5	4.71698	0.00264823	MEF2C, JUN, JUND, NOS2, VEGFA	85	67	9702	8.518	0.915983	0.0426457	0.0401801
DISGENET	C0038220~Status Epilepticus	5	4.71698	0.00279542	MEF2C, JUN, JUND, NOS2, VEGFA	85	68	9702	8.39273	0.926802	0.044253	0.0416944
DISGENET	C0546837~Malignant neoplasm of esophagus	5	4.71698	0.00458694	NOS2, KDR, BAX, ENO1, EGFR	85	78	9702	7.31674	0.986351	0.0702328	0.0661723
DISGENET	C0014859~Esophageal Neoplasms	5	4.71698	0.00458694	NOS2, KDR, BAX, ENO1, EGFR	85	78	9702	7.31674	0.986351	0.0702328	0.0661723
DISGENET	C0027626~Neoplasm Invasiveness	7	6.60377	0.00512993	PKM, HGF, ACO1, ENO1, ALDOA, HIF1A, EGFR	85	184	9702	4.34233	0.991801	0.07728	0.072812
DISGENET	C0011570~Mental Depression	8	7.54717	0.00633484	PER2, HDAC5, LDHA, NOS2, DUSP1, HIF1A, ATF3, VEGFA	85	254	9702	3.595	0.997356	0.0937149	0.0882967
DISGENET	C0549473~Thyroid carcinoma	4	3.77358	0.00642157	CDKN1B, NCOA4, PPARG, HIF1A	85	44	9702	10.3765	0.997563	0.0937149	0.0882967
DISGENET	C0015695~Fatty Liver	5	4.71698	0.00702595	SREBF1, CEBPB, HHEX, DDIT3, NR1D1	85	88	9702	6.48529	0.99862	0.0979488	0.0922858
DISGENET	C2711227~Steatohepatitis	5	4.71698	0.00702595	SREBF1, CEBPB, HHEX, DDIT3, NR1D1	85	88	9702	6.48529	0.99862	0.0979488	0.0922858
DISGENET	C0041696~Unipolar Depression	8	7.54717	0.00702631	HDAC5, LDHA, HSP90AA1, HSPA1L, DDIT4, KDR, HIF1A, EGFR	85	259	9702	3.5256	0.99862	0.0979488	0.0922858
DISGENET	C0035126~Reperfusion Injury	5	4.71698	0.0073089	JUN, NOS2, HGF, KDR, PPARG	85	89	9702	6.41243	0.998942	0.10039	0.0945858
DISGENET	C0024667~Animal Mammary Neoplasms	6	5.66038	0.00766178	PKM, SCD, SLC25A10, ENO1, EGFR, GNAI2	85	142	9702	4.82287	0.999241	0.10223	0.0963195
DISGENET	C1257925~Mammary Carcinoma, Animal	6	5.66038	0.00766178	PKM, SCD, SLC25A10, ENO1, EGFR, GNAI2	85	142	9702	4.82287	0.999241	0.10223	0.0963195
DISGENET	C0005586~Bipolar Disorder	11	10.3774	0.00791063	PER2, HDAC5, LDHA, NEDD4, BHLHE40, BHLHE41, NR1D1, PRODH, HIF1A, ITGA9, VEGFA	85	477	9702	2.63219	0.9994	0.102312	0.0963966
DISGENET	C0024121~Lung Neoplasms	8	7.54717	0.0079286	JUN, CDKN1B, JUND, NOS2, BHLHE41, EGFR, BCL2L1, MCL1	85	265	9702	3.44577	0.99941	0.102312	0.0963966
DISGENET	C0242379~Malignant neoplasm of lung	8	7.54717	0.00808696	JUN, CDKN1B, JUND, NOS2, BHLHE41, EGFR, BCL2L1, MCL1	85	266	9702	3.43282	0.999491	0.102312	0.0963966
DISGENET	C1258085~Barrett Epithelium	3	2.83019	0.00821562	HGF, PPARG, MCL1	85	16	9702	21.4015	0.999549	0.102312	0.0963966
DISGENET	C0004763~Barrett Esophagus	3	2.83019	0.00821562	HGF, PPARG, MCL1	85	16	9702	21.4015	0.999549	0.102312	0.0963966
DISGENET	C0086743~Osteoarthrosis Deformans	5	4.71698	0.00851583	SLC2A1, ACO1, PPARG, ENO1, GLS	85	93	9702	6.13662	0.99966	0.103296	0.0973238
DISGENET	C0029408~Degenerative polyarthritis	5	4.71698	0.00851583	SLC2A1, ACO1, PPARG, ENO1, GLS	85	93	9702	6.13662	0.99966	0.103296	0.0973238
DISGENET	C1319315~Adenocarcinoma of large intestine	5	4.71698	0.00950207	EEF2K, TBK1, MDM2, BAX, EGFR	85	96	9702	5.94485	0.999866	0.113781	0.107203
DISGENET	C0018923~Hemangiosarcoma	3	2.83019	0.0103583	JUN, KDR, VEGFA	85	18	9702	19.0235	0.99994	0.122464	0.115383
DISGENET	C0024668~Mammary Neoplasms, Experimental	6	5.66038	0.0109506	PKM, SCD, SLC25A10, ENO1, EGFR, GNAI2	85	155	9702	4.41837	0.999966	0.127227	0.119871
DISGENET	C2609414~Acute kidney injury	5	4.71698	0.011306	NOS2, BAX, PPARG, EGFR, VEGFA	85	101	9702	5.65055	0.999976	0.127227	0.119871
DISGENET	C0022660~Kidney Failure, Acute	5	4.71698	0.011306	NOS2, BAX, PPARG, EGFR, VEGFA	85	101	9702	5.65055	0.999976	0.127227	0.119871
DISGENET	C1565662~Acute Kidney Insufficiency	5	4.71698	0.011306	NOS2, BAX, PPARG, EGFR, VEGFA	85	101	9702	5.65055	0.999976	0.127227	0.119871
DISGENET	C4505456~HIV Coinfection	5	4.71698	0.0120853	HSP90AA1, SRF, ODC1, MDM2, BAX	85	103	9702	5.54083	0.999988	0.132796	0.125118
DISGENET	C0019693~HIV Infections	5	4.71698	0.0120853	HSP90AA1, SRF, ODC1, MDM2, BAX	85	103	9702	5.54083	0.999988	0.132796	0.125118
DISGENET	C0087169~Withdrawal Symptoms	4	3.77358	0.0137216	PER2, PER1, NOS2, GNAI1	85	58	9702	7.87181	0.999998	0.145637	0.137216
DISGENET	C0086189~Drug Withdrawal Symptoms	4	3.77358	0.0137216	PER2, PER1, NOS2, GNAI1	85	58	9702	7.87181	0.999998	0.145637	0.137216
DISGENET	C0038587~Substance Withdrawal Syndrome	4	3.77358	0.0137216	PER2, PER1, NOS2, GNAI1	85	58	9702	7.87181	0.999998	0.145637	0.137216
DISGENET	C1261473~Sarcoma	3	2.83019	0.0139808	JUN, MDM2, MCL1	85	21	9702	16.3059	0.999998	0.14672	0.138237
DISGENET	C1959583~Myocardial Failure	5	4.71698	0.0150814	NOS2, PPARG, PCK1, HIF1A, VEGFA	85	110	9702	5.18824	0.999999	0.148274	0.139702
DISGENET	C0235527~Heart Failure, Right-Sided	5	4.71698	0.0150814	NOS2, PPARG, PCK1, HIF1A, VEGFA	85	110	9702	5.18824	0.999999	0.148274	0.139702
DISGENET	C0023212~Left-Sided Heart Failure	5	4.71698	0.0150814	NOS2, PPARG, PCK1, HIF1A, VEGFA	85	110	9702	5.18824	0.999999	0.148274	0.139702
DISGENET	C0018802~Congestive heart failure	5	4.71698	0.0150814	NOS2, PPARG, PCK1, HIF1A, VEGFA	85	110	9702	5.18824	0.999999	0.148274	0.139702
DISGENET	C1961112~Heart Decompensation	5	4.71698	0.0150814	NOS2, PPARG, PCK1, HIF1A, VEGFA	85	110	9702	5.18824	0.999999	0.148274	0.139702
DISGENET	C0018801~Heart failure	5	4.71698	0.0150814	NOS2, PPARG, PCK1, HIF1A, VEGFA	85	110	9702	5.18824	0.999999	0.148274	0.139702
DISGENET	C0019829~Hodgkin Disease	3	2.83019	0.0152933	NFKBIA, REL, TNFAIP3	85	22	9702	15.5647	0.999999	0.148791	0.140188
DISGENET	C0205644~Carcinoma, Granular Cell	5	4.71698	0.0179934	KDR, PPARG, ENO1, EGFR, VEGFA	85	116	9702	4.91988	1	0.160735	0.151442
DISGENET	C0205643~Carcinoma, Cribriform	5	4.71698	0.0179934	KDR, PPARG, ENO1, EGFR, VEGFA	85	116	9702	4.91988	1	0.160735	0.151442
DISGENET	C0205645~Adenocarcinoma, Tubular	5	4.71698	0.0179934	KDR, PPARG, ENO1, EGFR, VEGFA	85	116	9702	4.91988	1	0.160735	0.151442
DISGENET	C0205642~Adenocarcinoma, Oxyphilic	5	4.71698	0.0179934	KDR, PPARG, ENO1, EGFR, VEGFA	85	116	9702	4.91988	1	0.160735	0.151442
DISGENET	C0001418~Adenocarcinoma	5	4.71698	0.0179934	KDR, PPARG, ENO1, EGFR, VEGFA	85	116	9702	4.91988	1	0.160735	0.151442
DISGENET	C0205641~Adenocarcinoma, Basal Cell	5	4.71698	0.0179934	KDR, PPARG, ENO1, EGFR, VEGFA	85	116	9702	4.91988	1	0.160735	0.151442
DISGENET	C0887900~Upper Aerodigestive Tract Neoplasms	3	2.83019	0.0180698	EGFR, BCL2L1, VEGFA	85	24	9702	14.2676	1	0.160735	0.151442
DISGENET	C0751177~Cancer of Head	3	2.83019	0.0180698	EGFR, BCL2L1, VEGFA	85	24	9702	14.2676	1	0.160735	0.151442
DISGENET	C0018675~Head Neoplasms	3	2.83019	0.0180698	EGFR, BCL2L1, VEGFA	85	24	9702	14.2676	1	0.160735	0.151442
DISGENET	C0746787~Cancer of Neck	3	2.83019	0.0195319	EGFR, BCL2L1, VEGFA	85	25	9702	13.6969	1	0.170494	0.160636
DISGENET	C0027533~Neck Neoplasms	3	2.83019	0.0195319	EGFR, BCL2L1, VEGFA	85	25	9702	13.6969	1	0.170494	0.160636
DISGENET	C0162351~Contact hypersensitivity	4	3.77358	0.0234655	HSP90AA1, DUSP1, DDIT3, VEGFA	85	71	9702	6.43049	1	0.201071	0.189446
DISGENET	C0011616~Contact Dermatitis	4	3.77358	0.0234655	HSP90AA1, DUSP1, DDIT3, VEGFA	85	71	9702	6.43049	1	0.201071	0.189446
DISGENET	C4704862~Polyarthritis, Juvenile, Rheumatoid Factor Positive	5	4.71698	0.02673	PER1, JUN, DUSP1, DDIT3, CREM	85	131	9702	4.35653	1	0.220937	0.208163
DISGENET	C4552091~Polyarthritis, Juvenile, Rheumatoid Factor Negative	5	4.71698	0.02673	PER1, JUN, DUSP1, DDIT3, CREM	85	131	9702	4.35653	1	0.220937	0.208163
DISGENET	C3495559~Juvenile arthritis	5	4.71698	0.02673	PER1, JUN, DUSP1, DDIT3, CREM	85	131	9702	4.35653	1	0.220937	0.208163
DISGENET	C3714758~Juvenile psoriatic arthritis	5	4.71698	0.02673	PER1, JUN, DUSP1, DDIT3, CREM	85	131	9702	4.35653	1	0.220937	0.208163
DISGENET	C0087031~Juvenile-Onset Still Disease	5	4.71698	0.0294226	PER1, JUN, DUSP1, DDIT3, CREM	85	135	9702	4.22745	1	0.241058	0.227121
DISGENET	C0017636~Glioblastoma	4	3.77358	0.0309156	BHLHE40, HIF1A, EGFR, VEGFA	85	79	9702	5.7793	1	0.251088	0.236571
DISGENET	C0018671~Head and Neck Neoplasms	3	2.83019	0.032882	EGFR, BCL2L1, VEGFA	85	33	9702	10.3765	1	0.262494	0.247318
DISGENET	C0263454~Chloracne	3	2.83019	0.032882	CDKN1B, CREM, EGFR	85	33	9702	10.3765	1	0.262494	0.247318
DISGENET	C0023893~Liver Cirrhosis, Experimental	13	12.2642	0.0338013	SREBF1, NOS2, HGF, INPPL1, DUSP16, GNAI2, GLS, VEGFA, NFKBIA, PPP1R3C, PCK1, PRODH, ATF3	85	774	9702	1.9171	1	0.267546	0.252078
DISGENET	C0151468~Thyroid Gland Follicular Adenoma	3	2.83019	0.0366465	NCOA4, PPARG, HIF1A	85	35	9702	9.78353	1	0.287629	0.270999
DISGENET	C0027055~Myocardial Reperfusion Injury	4	3.77358	0.0372256	NOS2, BAX, HIF1A, VEGFA	85	85	9702	5.37135	1	0.289739	0.272988
DISGENET	C0011581~Depressive disorder	7	6.60377	0.0389439	PER2, HDAC5, NOS2, DUSP1, NR1D1, ATF3, VEGFA	85	289	9702	2.76467	1	0.300609	0.283229
DISGENET	C0027627~Neoplasm Metastasis	6	5.66038	0.0397631	HSP90AA1, HGF, PXN, ALDOA, EGFR, VEGFA	85	217	9702	3.15598	1	0.304416	0.286816
DISGENET	C0040136~Thyroid Neoplasm	3	2.83019	0.0405684	NCOA4, PPARG, HIF1A	85	37	9702	9.25469	1	0.308056	0.290245
DISGENET	C1708349~Hereditary Diffuse Gastric Cancer	7	6.60377	0.0411978	JUN, CDKN1B, IRS2, PPARG, ENO1, EGFR, BCL2L1	85	293	9702	2.72692	1	0.310313	0.292372
DISGENET	C1332347~Atypical Ductal Breast Hyperplasia	2	1.88679	0.0425555	SLC2A1, HIF1A	85	5	9702	45.6565	1	0.315451	0.297213
DISGENET	C0007124~Noninfiltrating Intraductal Carcinoma	2	1.88679	0.0425555	SLC2A1, HIF1A	85	5	9702	45.6565	1	0.315451	0.297213
DISGENET	C0038356~Stomach Neoplasms	7	6.60377	0.0435332	JUN, CDKN1B, IRS2, PPARG, ENO1, EGFR, BCL2L1	85	297	9702	2.6902	1	0.320158	0.301648
DISGENET	C0027643~Neoplasm Recurrence, Local	3	2.83019	0.0446412	EGFR, GNAI2, VEGFA	85	39	9702	8.78009	1	0.325742	0.306909
DISGENET	C0024623~Malignant neoplasm of stomach	7	6.60377	0.0453387	JUN, CDKN1B, IRS2, PPARG, ENO1, EGFR, BCL2L1	85	300	9702	2.66329	1	0.328267	0.309288
DISGENET	C0017667~Nodular glomerulosclerosis	3	2.83019	0.0488588	KDR, PPARG, VEGFA	85	41	9702	8.35179	1	0.351032	0.330737
DISGENET	C0027686~Pathologic Neovascularization	2	1.88679	0.0508494	KDR, VEGFA	85	6	9702	38.0471	1	0.359798	0.338996
DISGENET	C0008313~Cholangitis, Sclerosing	2	1.88679	0.0508494	NOS2, HIF1A	85	6	9702	38.0471	1	0.359798	0.338996
DISGENET	C0011881~Diabetic Nephropathy	3	2.83019	0.0554433	KDR, PPARG, VEGFA	85	44	9702	7.78235	1	0.386448	0.364105
DISGENET	C0278996~Malignant Head and Neck Neoplasm	3	2.83019	0.0554433	EGFR, BCL2L1, VEGFA	85	44	9702	7.78235	1	0.386448	0.364105
DISGENET	C0525045~Mood Disorders	5	4.71698	0.0576448	LDHA, HSP90AA1, PPARG, HIF1A, VEGFA	85	168	9702	3.39706	1	0.398817	0.375759
DISGENET	C0034885~Rectal Neoplasms	2	1.88679	0.0590722	CDKN1B, EGFR	85	7	9702	32.6118	1	0.402726	0.379442
DISGENET	C0007113~Rectal Carcinoma	2	1.88679	0.0590722	CDKN1B, EGFR	85	7	9702	32.6118	1	0.402726	0.379442
DISGENET	C0029463~Osteosarcoma	3	2.83019	0.06232	JUN, EGFR, VEGFA	85	47	9702	7.28561	1	0.421789	0.397403
DISGENET	C0003873~Rheumatoid Arthritis	5	4.71698	0.0639274	DDIT4, REL, TNFAIP3, ENO1, VEGFA	85	174	9702	3.27992	1	0.424242	0.399714
DISGENET	C0848676~Subfertility, Male	3	2.83019	0.0646739	MDM2, BAX, ENO1	85	48	9702	7.13382	1	0.424242	0.399714
DISGENET	C0917731~Male sterility	3	2.83019	0.0646739	MDM2, BAX, ENO1	85	48	9702	7.13382	1	0.424242	0.399714
DISGENET	C0021364~Male infertility	3	2.83019	0.0646739	MDM2, BAX, ENO1	85	48	9702	7.13382	1	0.424242	0.399714
DISGENET	C0472383~Subarachnoid Hemorrhage, Spontaneous	2	1.88679	0.0672246	NOS2, PPARG	85	8	9702	28.5353	1	0.424242	0.399714
DISGENET	C0270192~Perinatal Subarachnoid Hemorrhage	2	1.88679	0.0672246	NOS2, PPARG	85	8	9702	28.5353	1	0.424242	0.399714
DISGENET	C0566602~Primary sclerosing cholangitis	2	1.88679	0.0672246	NOS2, HIF1A	85	8	9702	28.5353	1	0.424242	0.399714
DISGENET	C0795688~Subarachnoid Hemorrhage, Intracranial	2	1.88679	0.0672246	NOS2, PPARG	85	8	9702	28.5353	1	0.424242	0.399714
DISGENET	C0751530~Subarachnoid Hemorrhage, Aneurysmal	2	1.88679	0.0672246	NOS2, PPARG	85	8	9702	28.5353	1	0.424242	0.399714
DISGENET	C0021831~Intestinal Diseases	2	1.88679	0.0672246	NOS2, DDIT3	85	8	9702	28.5353	1	0.424242	0.399714
DISGENET	C1621958~Glioblastoma Multiforme	4	3.77358	0.0714121	BHLHE40, HIF1A, EGFR, VEGFA	85	111	9702	4.1132	1	0.447644	0.421763
DISGENET	C0238301~Cancer of Nasopharynx	2	1.88679	0.0753073	NFKBIA, EGFR	85	9	9702	25.3647	1	0.462743	0.43599
DISGENET	C0038525~Subarachnoid Hemorrhage	2	1.88679	0.0753073	NOS2, PPARG	85	9	9702	25.3647	1	0.462743	0.43599
DISGENET	C0037116~Silicosis	2	1.88679	0.0753073	JUN, NOS2	85	9	9702	25.3647	1	0.462743	0.43599
DISGENET	C0027765~nervous system disorder	3	2.83019	0.0768748	SLC2A1, PRODH, ATF3	85	53	9702	6.46082	1	0.469288	0.442155
DISGENET	C0020538~Hypertensive disease	5	4.71698	0.0823621	JUN, NOS2, INPPL1, PPARG, HIF1A	85	190	9702	3.00372	1	0.499521	0.47064
DISGENET	C0242350~Erectile dysfunction	2	1.88679	0.0833207	BCL2L1, VEGFA	85	10	9702	22.8282	1	0.501266	0.472285
DISGENET	C0376358~Malignant neoplasm of prostate	10	9.43396	0.0842599	CDKN1B, XPO1, MDM2, BAX, HIF1A, ATF3, FOXO1, EGFR, JAK1, VEGFA	85	616	9702	1.85294	1	0.501266	0.472285
DISGENET	C0033578~Prostatic Neoplasms	10	9.43396	0.0842599	CDKN1B, XPO1, MDM2, BAX, HIF1A, ATF3, FOXO1, EGFR, JAK1, VEGFA	85	616	9702	1.85294	1	0.501266	0.472285
DISGENET	C1176475~Ductal Carcinoma	2	1.88679	0.0912655	SLC2A1, HIF1A	85	11	9702	20.7529	1	0.529343	0.498738
DISGENET	C0520572~Enzymopathy	2	1.88679	0.0912655	ENO1, ALDOA	85	11	9702	20.7529	1	0.529343	0.498738
DISGENET	C0342257~Complications of Diabetes Mellitus	2	1.88679	0.0912655	HIF1A, VEGFA	85	11	9702	20.7529	1	0.529343	0.498738
DISGENET	C0007137~Squamous cell carcinoma	4	3.77358	0.0923395	HGF, ENO1, EGFR, VEGFA	85	124	9702	3.68197	1	0.529343	0.498738
DISGENET	C0004153~Atherosclerosis	3	2.83019	0.0923799	NOS2, PPARG, VEGFA	85	59	9702	5.80379	1	0.529343	0.498738
DISGENET	C1563937~Atherogenesis	3	2.83019	0.0923799	NOS2, PPARG, VEGFA	85	59	9702	5.80379	1	0.529343	0.498738
DISGENET	C0021368~Inflammation	4	3.77358	0.0974952	NOS2, TNFAIP3, PPARG, VEGFA	85	127	9702	3.595	1	0.544699	0.513207
DISGENET	C0346627~Intestinal Cancer	2	1.88679	0.0991423	CDKN1B, BAX	85	12	9702	19.0235	1	0.544699	0.513207
DISGENET	C0085580~Essential Hypertension	2	1.88679	0.0991423	NOS2, ATP1B1	85	12	9702	19.0235	1	0.544699	0.513207
DISGENET	C0030354~Papilloma	2	1.88679	0.0991423	ODC1, EGFR	85	12	9702	19.0235	1	0.544699	0.513207
DISGENET	C0021841~Intestinal Neoplasms	2	1.88679	0.0991423	CDKN1B, BAX	85	12	9702	19.0235	1	0.544699	0.513207
DISGENET	C0205874~Papilloma, Squamous Cell	2	1.88679	0.0991423	ODC1, EGFR	85	12	9702	19.0235	1	0.544699	0.513207
DISGENET	C0205875~Papillomatosis	2	1.88679	0.0991423	ODC1, EGFR	85	12	9702	19.0235	1	0.544699	0.513207

## Sheet: Intestine KEGG
Category	Term	Count	%	p-value	Genes	List Total	Pop Hits	Pop Total	Fold Enrichment	Bonferroni	Benjamini	FDR
DISGENET	C0002152~Alloxan Diabetes	6	16.2162	1.77819e-05	INSR, IRS2, PPARG, PCK1, FOXO3, VEGFA	31	108	9702	17.3871	0.0105597	0.00353859	0.0034971
DISGENET	C0038433~Streptozotocin Diabetes	6	16.2162	1.77819e-05	INSR, IRS2, PPARG, PCK1, FOXO3, VEGFA	31	108	9702	17.3871	0.0105597	0.00353859	0.0034971
DISGENET	C0011853~Diabetes Mellitus, Experimental	6	16.2162	1.77819e-05	INSR, IRS2, PPARG, PCK1, FOXO3, VEGFA	31	108	9702	17.3871	0.0105597	0.00353859	0.0034971
DISGENET	C0017919~Glycogen Storage Disease	4	10.8108	7.42307e-05	GYS1, PFKL, ALDOA, PGM1	31	27	9702	46.3656	0.0433497	0.0110789	0.010949
DISGENET	C0549473~Thyroid carcinoma	4	10.8108	0.000324396	RXRA, CDKN1B, PPARG, HIF1A	31	44	9702	28.4516	0.176091	0.0387329	0.0382787
DISGENET	C0345904~Malignant neoplasm of liver	5	13.5135	0.000896774	EGLN3, CDKN1B, SCD, SLC2A1, PPARG	31	142	9702	11.02	0.41469	0.076482	0.0755853
DISGENET	C0023903~Liver neoplasms	5	13.5135	0.000896774	EGLN3, CDKN1B, SCD, SLC2A1, PPARG	31	142	9702	11.02	0.41469	0.076482	0.0755853
DISGENET	C1708349~Hereditary Diffuse Gastric Cancer	6	16.2162	0.00186004	SMAD4, CDKN1B, BNIP3, APOA1, IRS2, PPARG	31	293	9702	6.4089	0.670929	0.123179	0.121735
DISGENET	C0038356~Stomach Neoplasms	6	16.2162	0.00197429	SMAD4, CDKN1B, BNIP3, APOA1, IRS2, PPARG	31	297	9702	6.32258	0.692665	0.123179	0.121735
DISGENET	C0024623~Malignant neoplasm of stomach	6	16.2162	0.0020633	SMAD4, CDKN1B, BNIP3, APOA1, IRS2, PPARG	31	300	9702	6.25935	0.708602	0.123179	0.121735
DISGENET	C2239176~Liver carcinoma	7	18.9189	0.00401186	CDKN1B, SCD, SLC2A1, APOA1, IRS2, PPARG, PCK1	31	507	9702	4.32105	0.909273	0.144804	0.143107
DISGENET	C1961112~Heart Decompensation	4	10.8108	0.00460798	PPARG, PCK1, HIF1A, VEGFA	31	110	9702	11.3806	0.936539	0.144804	0.143107
DISGENET	C1959583~Myocardial Failure	4	10.8108	0.00460798	PPARG, PCK1, HIF1A, VEGFA	31	110	9702	11.3806	0.936539	0.144804	0.143107
DISGENET	C0018802~Congestive heart failure	4	10.8108	0.00460798	PPARG, PCK1, HIF1A, VEGFA	31	110	9702	11.3806	0.936539	0.144804	0.143107
DISGENET	C0023212~Left-Sided Heart Failure	4	10.8108	0.00460798	PPARG, PCK1, HIF1A, VEGFA	31	110	9702	11.3806	0.936539	0.144804	0.143107
DISGENET	C0235527~Heart Failure, Right-Sided	4	10.8108	0.00460798	PPARG, PCK1, HIF1A, VEGFA	31	110	9702	11.3806	0.936539	0.144804	0.143107
DISGENET	C0018801~Heart failure	4	10.8108	0.00460798	PPARG, PCK1, HIF1A, VEGFA	31	110	9702	11.3806	0.936539	0.144804	0.143107
DISGENET	C4704874~Mammary Carcinoma, Human	7	18.9189	0.00476172	EFNA1, CDKN1B, MDM2, SLC2A1, ANGPTL4, ALDOA, HIF1A	31	525	9702	4.1729	0.942129	0.144804	0.143107
DISGENET	C1257931~Mammary Neoplasms, Human	7	18.9189	0.00476172	EFNA1, CDKN1B, MDM2, SLC2A1, ANGPTL4, ALDOA, HIF1A	31	525	9702	4.1729	0.942129	0.144804	0.143107
DISGENET	C1458155~Mammary Neoplasms	7	18.9189	0.00485107	EFNA1, CDKN1B, MDM2, SLC2A1, ANGPTL4, ALDOA, HIF1A	31	527	9702	4.15707	0.945149	0.144804	0.143107
DISGENET	C0151468~Thyroid Gland Follicular Adenoma	3	8.10811	0.00516208	RXRA, PPARG, HIF1A	31	35	9702	26.8258	0.954486	0.145586	0.143879
DISGENET	C0678222~Breast Carcinoma	7	18.9189	0.00536499	EFNA1, CDKN1B, MDM2, SLC2A1, ANGPTL4, ALDOA, HIF1A	31	538	9702	4.07207	0.959705	0.145586	0.143879
DISGENET	C0040136~Thyroid Neoplasm	3	8.10811	0.00575597	RXRA, PPARG, HIF1A	31	37	9702	25.3758	0.968135	0.149405	0.147653
DISGENET	C0268194~Phosphoenolpyruvate carboxykinase deficiency	2	5.40541	0.00617505	PCK1, PCK2	31	2	9702	312.968	0.975225	0.153604	0.151803
DISGENET	C0006826~Malignant Neoplasms	4	10.8108	0.00702156	ATF2, CDKN1B, MDM2, VEGFA	31	128	9702	9.78024	0.985104	0.167675	0.165709
DISGENET	C0007131~Non-Small Cell Lung Carcinoma	4	10.8108	0.0120459	MDM2, FOXO3, HIF1A, VEGFA	31	156	9702	8.02481	0.999279	0.241448	0.238617
DISGENET	C0006142~Malignant neoplasm of breast	9	24.3243	0.0139068	EFNA1, ATF2, PFKFB4, CDKN1B, MDM2, SLC2A1, ANGPTL4, ALDOA, HIF1A	31	1074	9702	2.62263	0.999766	0.241448	0.238617
DISGENET	C0920563~Insulin Sensitivity	3	8.10811	0.0146395	INSR, IRS2, PPARG	31	60	9702	15.6484	0.99985	0.241448	0.238617
DISGENET	C0021655~Insulin Resistance	3	8.10811	0.0146395	INSR, IRS2, PPARG	31	60	9702	15.6484	0.99985	0.241448	0.238617
DISGENET	C0525045~Mood Disorders	4	10.8108	0.0146966	PFKL, PPARG, HIF1A, VEGFA	31	168	9702	7.45161	0.999855	0.241448	0.238617
DISGENET	C0752307~Anoxia-Ischemia, Cerebral	2	5.40541	0.0153686	HIF1A, VEGFA	31	5	9702	125.187	0.999904	0.241448	0.238617
DISGENET	C0752305~Anoxic-Ischemic Encephalopathy	2	5.40541	0.0153686	HIF1A, VEGFA	31	5	9702	125.187	0.999904	0.241448	0.238617
DISGENET	C1332347~Atypical Ductal Breast Hyperplasia	2	5.40541	0.0153686	SLC2A1, HIF1A	31	5	9702	125.187	0.999904	0.241448	0.238617
DISGENET	C0752304~Hypoxic-Ischemic Encephalopathy	2	5.40541	0.0153686	HIF1A, VEGFA	31	5	9702	125.187	0.999904	0.241448	0.238617
DISGENET	C0752308~Hypoxia-Ischemia, Brain	2	5.40541	0.0153686	HIF1A, VEGFA	31	5	9702	125.187	0.999904	0.241448	0.238617
DISGENET	C0007124~Noninfiltrating Intraductal Carcinoma	2	5.40541	0.0153686	SLC2A1, HIF1A	31	5	9702	125.187	0.999904	0.241448	0.238617
DISGENET	C0178540~Cerebral Hypoxia-Ischemia	2	5.40541	0.0153686	HIF1A, VEGFA	31	5	9702	125.187	0.999904	0.241448	0.238617
DISGENET	C0752306~Anoxia-Ischemia, Brain	2	5.40541	0.0153686	HIF1A, VEGFA	31	5	9702	125.187	0.999904	0.241448	0.238617
DISGENET	C0010054~Coronary Arteriosclerosis	3	8.10811	0.0170402	APOA1, ANGPTL4, VEGFA	31	65	9702	14.4447	0.999965	0.254325	0.251343
DISGENET	C1956346~Coronary Artery Disease	3	8.10811	0.0170402	APOA1, ANGPTL4, VEGFA	31	65	9702	14.4447	0.999965	0.254325	0.251343
DISGENET	C0024115~Lung diseases	3	8.10811	0.0240004	INSR, HIF1A, VEGFA	31	78	9702	12.0372	0.999999	0.34947	0.345372
DISGENET	C0028754~Obesity	4	10.8108	0.0248195	PPARG, ANGPTL4, PCK1, FOXO3	31	205	9702	6.10669	1	0.352792	0.348655
DISGENET	C4551637~Erythrocytosis familial, 1	2	5.40541	0.0274988	EGLN2, HIF1A	31	9	9702	69.5484	1	0.373732	0.36935
DISGENET	C0334588~Giant Cell Glioblastoma	3	8.10811	0.0275448	PPARG, HIF1A, VEGFA	31	84	9702	11.1774	1	0.373732	0.36935
DISGENET	C0011860~Diabetes Mellitus, Non-Insulin-Dependent	4	10.8108	0.0301203	INSR, SLC2A1, IRS2, PPARG	31	221	9702	5.66457	1	0.39773	0.393066
DISGENET	C0342257~Complications of Diabetes Mellitus	2	5.40541	0.0335096	HIF1A, VEGFA	31	11	9702	56.9032	1	0.39773	0.393066
DISGENET	C1176475~Ductal Carcinoma	2	5.40541	0.0335096	SLC2A1, HIF1A	31	11	9702	56.9032	1	0.39773	0.393066
DISGENET	C1319315~Adenocarcinoma of large intestine	3	8.10811	0.0352199	SMAD4, EEF2K, MDM2	31	96	9702	9.78024	1	0.39773	0.393066
DISGENET	C0750900~Alzheimer's Disease, Focal Onset	3	8.10811	0.0372551	INSR, PPARG, VEGFA	31	99	9702	9.48387	1	0.39773	0.393066
DISGENET	C0011265~Presenile dementia	3	8.10811	0.0372551	INSR, PPARG, VEGFA	31	99	9702	9.48387	1	0.39773	0.393066
DISGENET	C0750901~Alzheimer Disease, Early Onset	3	8.10811	0.0372551	INSR, PPARG, VEGFA	31	99	9702	9.48387	1	0.39773	0.393066
DISGENET	C0546126~Acute Confusional Senile Dementia	3	8.10811	0.0372551	INSR, PPARG, VEGFA	31	99	9702	9.48387	1	0.39773	0.393066
DISGENET	C0494463~Alzheimer Disease, Late Onset	3	8.10811	0.0372551	INSR, PPARG, VEGFA	31	99	9702	9.48387	1	0.39773	0.393066
DISGENET	C0276496~Familial Alzheimer Disease (FAD)	3	8.10811	0.0379435	INSR, PPARG, VEGFA	31	100	9702	9.38903	1	0.39773	0.393066
DISGENET	C0030297~Pancreatic Neoplasm	3	8.10811	0.0379435	SMAD4, PPARG, HIF1A	31	100	9702	9.38903	1	0.39773	0.393066
DISGENET	C0002395~Alzheimer's Disease	3	8.10811	0.0386368	INSR, PPARG, VEGFA	31	101	9702	9.29607	1	0.39773	0.393066
DISGENET	C0376358~Malignant neoplasm of prostate	6	16.2162	0.0386404	RXRA, CDKN1B, BNIP3, MDM2, HIF1A, VEGFA	31	616	9702	3.04839	1	0.39773	0.393066
DISGENET	C0033578~Prostatic Neoplasms	6	16.2162	0.0386404	RXRA, CDKN1B, BNIP3, MDM2, HIF1A, VEGFA	31	616	9702	3.04839	1	0.39773	0.393066
DISGENET	C0346647~Malignant neoplasm of pancreas	3	8.10811	0.039335	SMAD4, PPARG, HIF1A	31	102	9702	9.20493	1	0.398016	0.39335
DISGENET	C0345967~Malignant mesothelioma	3	8.10811	0.0443563	RXRA, SLC2A1, APOA1	31	109	9702	8.61379	1	0.423051	0.418091
DISGENET	C3888631~Monogenic diabetes	2	5.40541	0.0483799	INSR, PPARG	31	16	9702	39.121	1	0.423051	0.418091
DISGENET	C0206726~gliosarcoma	2	5.40541	0.0483799	PPARG, VEGFA	31	16	9702	39.121	1	0.423051	0.418091
DISGENET	C1258085~Barrett Epithelium	2	5.40541	0.0483799	PPARG, MCL1	31	16	9702	39.121	1	0.423051	0.418091
DISGENET	C0004763~Barrett Esophagus	2	5.40541	0.0483799	PPARG, MCL1	31	16	9702	39.121	1	0.423051	0.418091
DISGENET	C0205642~Adenocarcinoma, Oxyphilic	3	8.10811	0.049604	APOA1, PPARG, VEGFA	31	116	9702	8.09399	1	0.423051	0.418091
DISGENET	C0205645~Adenocarcinoma, Tubular	3	8.10811	0.049604	APOA1, PPARG, VEGFA	31	116	9702	8.09399	1	0.423051	0.418091
DISGENET	C0205641~Adenocarcinoma, Basal Cell	3	8.10811	0.049604	APOA1, PPARG, VEGFA	31	116	9702	8.09399	1	0.423051	0.418091
DISGENET	C0205644~Carcinoma, Granular Cell	3	8.10811	0.049604	APOA1, PPARG, VEGFA	31	116	9702	8.09399	1	0.423051	0.418091
DISGENET	C0001418~Adenocarcinoma	3	8.10811	0.049604	APOA1, PPARG, VEGFA	31	116	9702	8.09399	1	0.423051	0.418091
DISGENET	C0205643~Carcinoma, Cribriform	3	8.10811	0.049604	APOA1, PPARG, VEGFA	31	116	9702	8.09399	1	0.423051	0.418091
DISGENET	C0023794~Lipoidosis	2	5.40541	0.0571957	SCD, PPARG	31	19	9702	32.944	1	0.480927	0.475288
DISGENET	C0021368~Inflammation	3	8.10811	0.0582805	APOA1, PPARG, VEGFA	31	127	9702	7.39294	1	0.483243	0.477577
DISGENET	C1261473~Sarcoma	2	5.40541	0.063029	MDM2, MCL1	31	21	9702	29.8065	1	0.515456	0.509412
DISGENET	C0242488~Acute Lung Injury	2	5.40541	0.0659325	APOA1, PPARG	31	22	9702	28.4516	1	0.531915	0.525678
DISGENET	C0007621~Neoplastic Cell Transformation	3	8.10811	0.068302	MDM2, SLC2A1, HIF1A	31	139	9702	6.7547	1	0.540657	0.534317
DISGENET	C1708353~Hereditary Paraganglioma-Pheochromocytoma Syndrome	2	5.40541	0.0688273	EGLN1, EGLN2	31	23	9702	27.2146	1	0.540657	0.534317
DISGENET	C0598784~Dyslipoproteinemias	2	5.40541	0.0717135	PPARG, ANGPTL4	31	24	9702	26.0806	1	0.548884	0.542448
DISGENET	C0242339~Dyslipidemias	2	5.40541	0.0717135	PPARG, ANGPTL4	31	24	9702	26.0806	1	0.548884	0.542448
DISGENET	C0009375~Colonic Neoplasms	3	8.10811	0.0797551	SLC2A1, PPARG, VEGFA	31	152	9702	6.17699	1	0.602706	0.595639
DISGENET	C0007102~Malignant tumor of colon	3	8.10811	0.0861578	SLC2A1, PPARG, VEGFA	31	159	9702	5.90505	1	0.62325	0.615942
DISGENET	C0020456~Hyperglycemia	2	5.40541	0.0888497	INSR, IRS2	31	30	9702	20.8645	1	0.62325	0.615942
DISGENET	C1855520~Hyperglycemia, Postprandial	2	5.40541	0.0888497	INSR, IRS2	31	30	9702	20.8645	1	0.62325	0.615942
DISGENET	C0205696~Anaplastic carcinoma	3	8.10811	0.0898857	SCD, ANGPTL4, HIF1A	31	163	9702	5.76014	1	0.62325	0.615942
DISGENET	C0205697~Carcinoma, Spindle-Cell	3	8.10811	0.0898857	SCD, ANGPTL4, HIF1A	31	163	9702	5.76014	1	0.62325	0.615942
DISGENET	C0205699~Carcinomatosis	3	8.10811	0.0898857	SCD, ANGPTL4, HIF1A	31	163	9702	5.76014	1	0.62325	0.615942
DISGENET	C0205698~Undifferentiated carcinoma	3	8.10811	0.0898857	SCD, ANGPTL4, HIF1A	31	163	9702	5.76014	1	0.62325	0.615942
DISGENET	C0007097~Carcinoma	3	8.10811	0.0908253	SCD, ANGPTL4, HIF1A	31	164	9702	5.72502	1	0.62325	0.615942
DISGENET	C0003129~Anoxemia	2	5.40541	0.0973028	APOA1, PCK2	31	33	9702	18.9677	1	0.638349	0.630864
DISGENET	C0242184~Hypoxia	2	5.40541	0.0973028	APOA1, PCK2	31	33	9702	18.9677	1	0.638349	0.630864
DISGENET	C0003130~Anoxia	2	5.40541	0.0973028	APOA1, PCK2	31	33	9702	18.9677	1	0.638349	0.630864
DISGENET	C0700292~Hypoxemia	2	5.40541	0.0973028	APOA1, PCK2	31	33	9702	18.9677	1	0.638349	0.630864
